# Supplementary material for: Asymmetric [3 + 2] photocycloadditions of cyclopropylamines with electron-rich and electron-neutral olefins
Source: Royal Society of Chemistry journal article supplement (doi:10.1039/d1sc07044d), 2022-01-01
Supplement: d1sc07044d1.pdf [file d1sc07044d1.pdf]

# Supporting Information

## Asymmetric [3 + 2] photocycloadditions of cyclopropylamines with electron-rich and electron-neutral olefins

Yating Dai,<sup>1</sup> Shuangshuang Liang,<sup>2</sup> Guangkuo Zeng,<sup>2</sup> Hongchun Huang,<sup>2</sup> Xiaowei Zhao,<sup>2,\*</sup>  
Shanshan Cao,<sup>1,\*</sup> and Zhiyong Jiang<sup>1,2,\*</sup>

<sup>†</sup>*School of Chemistry and Chemical Engineering, Henan Normal University, Xinxiang, Henan,  
P. R. China 453007*

<sup>‡</sup>*International Scientific and Technological Cooperation Base of Chiral Chemistry, Henan  
University, Kaifeng, Henan, P. R. China 475004*

## Table of Contents

|                                                 |           |
|-------------------------------------------------|-----------|
| 1. General information                          | S3-S4     |
| 2. Optimization of reaction conditions          | S5-S14    |
| 3. General experimental procedures              | S15-S18   |
| 4. Mechanism studies                            | S19-S94   |
| 5. Synthetic applications                       | S95-S97   |
| 6. Determination of the absolute configurations | S98-S136  |
| 7. Characterization of adducts                  | S137-S214 |
| 8. Copies of NMR spectra                        | S215-S314 |
| 9. Other attempted substrates                   | S315      |

## 1. General information

### General procedures and methods

Experiments involving moisture and/or air sensitive components were performed under a positive pressure of argon in oven-dried glassware equipped with a rubber septum inlet. Dried solvents and liquid reagents were transferred by oven-dried syringes or hypodermic syringe cooled to ambient temperature in a desiccator. Reaction mixtures were stirred in 10 mL sample vial with Teflon-coated magnetic stirring bars unless otherwise stated. Moisture in non-volatile reagents/compounds was removed in high *vacuo* by means of an oil pump and subsequent purging with nitrogen. Solvents were removed *in vacuo* under ~30 mmHg and heated with a water bath at 30–35 °C using rotary evaporator with aspirator. The condenser was cooled with running water at 0 °C.

All experiments were monitored by analytical thin layer chromatography (TLC). TLC was performed on pre-coated plates, 60 F<sub>254</sub>. After elution, plate was visualized under UV illumination at 254 nm for UV active material. Further visualization was achieved by staining Ce(SO<sub>4</sub>)<sub>2</sub> and anisaldehyde solution. For those using the aqueous stains, the TLC plates were heated on a hot plate.

Columns for flash chromatography (FC) contained *silica gel* 200–300 mesh. Columns were packed as slurry of *silica gel* in petroleum ether and equilibrated solution using the appropriate solvent system. The elution was assisted by applying pressure of about 2 atm with an air pump.

### Instrumentations

Proton nuclear magnetic resonance (<sup>1</sup>H NMR) and carbon NMR (<sup>13</sup>C NMR) were recorded in CDCl<sub>3</sub> otherwise stated. Chemical shifts are reported in parts per million (ppm), using the residual solvent signal as an internal standard: CDCl<sub>3</sub> (<sup>1</sup>H NMR: δ 7.26, singlet; <sup>13</sup>C NMR: δ 77.0, triplet). Multiplicities were given as: *s* (singlet), *d* (doublet), *t* (triplet), *q* (quartet), *quintet*, *m* (multiplets), *dd* (doublet of doublets), *dt* (doublet of triplets), and *br* (broad). Coupling constants (*J*) were recorded in Hertz (Hz). The number of proton atoms (*n*) for a given resonance was indicated by *n*H. The number of carbon atoms (*n*) for a given resonance was indicated by *n*C. HRMS (Analyzer: TOF) was reported in units of mass of charge ratio (*m/z*). Mass samples were dissolved in CH<sub>3</sub>CN (HPLC Grade) unless otherwise stated.

Optical rotations were recorded on a polarimeter with a sodium lamp of wavelength 589 nm and reported as follows;  ( $c = \text{g}/100 \text{ mL}$ , solvent). Melting points were determined on a melting point apparatus.

Enantiomeric excesses were determined by chiral High Performance Liquid Chromatography (HPLC) analysis. UV detection was monitored at 254 nm and 210 nm at the same time. HPLC samples were dissolved in HPLC grade isopropanol (IPA) unless otherwise stated.

### **Materials**

All commercial reagents were purchased with the highest purity grade. They were used without further purification unless specified. All solvents used, mainly petroleum ether (PE) and ethyl acetate (EtOAc) were distilled. Anhydrous dichloromethane (DCM) and  $\text{CH}_3\text{CN}$  were freshly distilled from  $\text{CaH}_2$  and stored under  $\text{N}_2$  atmosphere. THF, CPME, MTBE, and  $\text{Et}_2\text{O}$  were freshly distilled from sodium/benzophenone before use. All compounds synthesized were stored in a  $-20 \text{ }^\circ\text{C}$  freezer and light-sensitive compounds were protected with aluminium foil.



## 2. Optimization of reaction conditions

**Table S1. Control experiments for the reaction between 1e and 2a<sup>a</sup>**

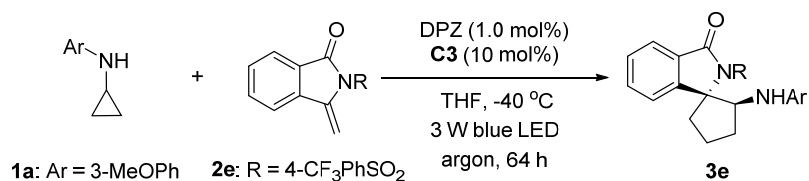

| entry | variation from the standard conditions                | yield (%) <sup>b</sup> | ee (%) <sup>c</sup> | dr <sup>d</sup> |
|-------|-------------------------------------------------------|------------------------|---------------------|-----------------|
| 1     | Rose Bengal instead of DPZ                            | 75                     | 93                  | >19:1           |
| 2     | [Ru(bpy) <sub>3</sub> ]Cl <sub>2</sub> instead of DPZ | 73                     | 92                  | >19:1           |
| 3     | toluene instead of THF                                | 30                     | 80                  | >19:1           |
| 4     | CH <sub>2</sub> Cl <sub>2</sub> instead of THF        | 45                     | 90                  | >19:1           |
| 5     | no <b>C3</b>                                          | 73                     | N.A.                | 1:2             |
| 6     | no DPZ                                                | 0 <sup>e</sup>         | N.A.                | N.A.            |
| 7     | no light                                              | 0 <sup>e</sup>         | N.A.                | N.A.            |
| 8     | under air                                             | 0 <sup>f</sup>         | N.A.                | N.A.            |

<sup>a</sup>Reactions were performed with **1e** (0.05 mmol) and **2a** (0.06 mmol). <sup>b</sup>Yields of isolated product **3e**. <sup>c</sup>Enantiomeric excesses were determined by HPLC analysis on a chiral stationary phase. <sup>d</sup>Determined by <sup>1</sup>H NMR analysis of the crude reaction mixture. <sup>e</sup>No reaction was observed. <sup>f</sup>**2a** was consumed, but **3e** was not obtained. bpy = 2,2'-bipyridine.

**Table S2. Optimization of the reaction conditions with respect to linear electron-rich terminal olefins—part I<sup>a</sup>**

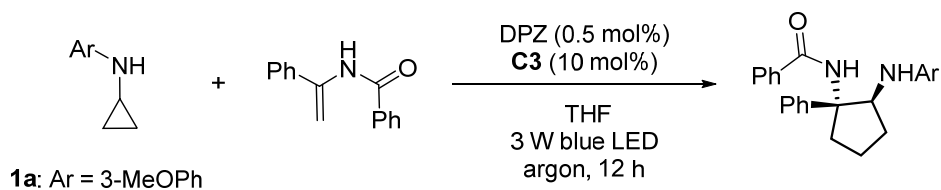

| entry | <i>T</i> (°C) | conv. (%) <sup>b</sup> | ee (%) <sup>c</sup> | dr <sup>d</sup> |
|-------|---------------|------------------------|---------------------|-----------------|
| 1     | 25            | 40                     | 50                  | 3:1             |
| 2     | 0             | 30                     | 63                  | 3.3:1           |
| 3     | -15           | 20                     | 69                  | 4:1             |
| 4     | -30           | 10                     | 77                  | 4:1             |
| 5     | -50           | <5                     | N.D.                | N.D.            |

<sup>a</sup>Reactions were performed with **1a** (0.06 mmol), olefin (0.05 mmol), DPZ (0.5 mol%) in 3.0 mL THF. <sup>b</sup>Determined by TLC analysis of the UV (254 nm) and Ce(SO<sub>4</sub>)<sub>2</sub> solution-staining signals between olefin and product. <sup>c</sup>Enantiomeric excesses were determined by HPLC analysis on a chiral stationary phase. <sup>d</sup>Determined by <sup>1</sup>H-NMR analysis of the crude reaction mixture.

**Note:** We used *N*-cyclopropyl-3-ethoxyaniline instead of *N*-cyclopropyl-3-methoxyaniline **1a** to react with several *N*-benzoyl  $\alpha$ -aryl ethenamines using 0.5 mol% DPZ, 10 mol% SPINOL CPA C3 in 3.0 mL THF as the solvent and at -40 °C. The reactions worked for 60 hours and the results are summarized as below:

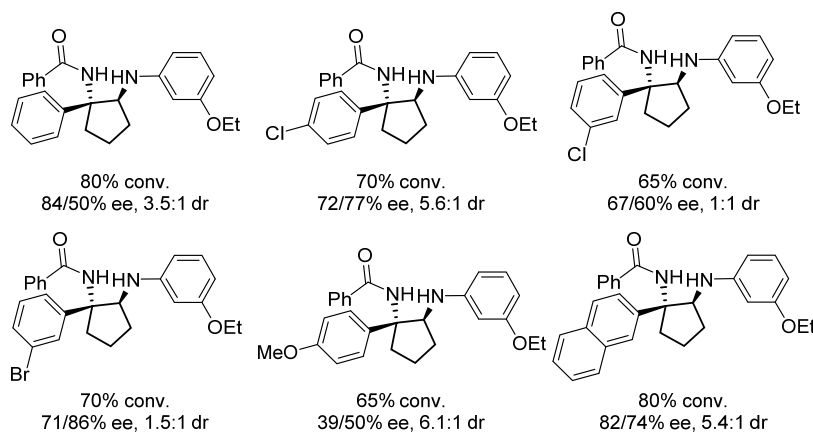

**Comments:** Given the unsatisfactory results obtained, we had to modify both *N*-protective groups of two substrates and further investigate reaction parameters to attain better results.

**Table S3. Optimization of the reaction conditions with respect to *N*-protective  $\alpha$ -phenyl**

**ethenamine–part II<sup>a</sup>**

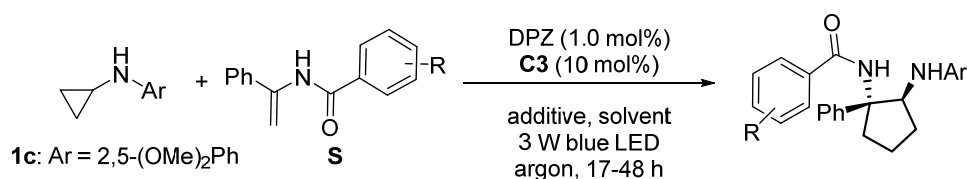

| entry           | 1c:S  | R          | additive (mol%)                       | solvent (mL)                          | <i>T</i> (°C) | conv. (%) <sup>b</sup> | ee (%) <sup>c</sup> | dr <sup>d</sup> |
|-----------------|-------|------------|---------------------------------------|---------------------------------------|---------------|------------------------|---------------------|-----------------|
| 1               | 1.2:1 | H          | --                                    | THF (3.0)                             | 25            | 25                     | 77/50               | 1:1             |
| 2               | 1.2:1 | H          | --                                    | THF (3.0)                             | -10           | 15                     | 84/59               | 1.2:1           |
| 3               | 1.2:1 | H          | --                                    | THF (3.0)                             | -20           | trace                  | N.D.                | N.D.            |
| 4               | 1.2:1 | H          | --                                    | THF (3.0)                             | -30           | N.R.                   | N.A.                | N.A.            |
| 5               | 1:1.5 | H          | --                                    | THF (3.0)                             | -10           | 25                     | 85/59               | 1.5:1           |
| 6               | 1:2   | H          | --                                    | THF (3.0)                             | -10           | 50                     | 86/59               | 1.6:1           |
| 7               | 1:3   | H          | --                                    | THF (3.0)                             | -10           | 50                     | 86/59               | 1.6:1           |
| 8               | 1:2   | H          | --                                    | Et <sub>2</sub> O (3.0)               | -10           | 30                     | 88/79               | 1:2             |
| 9               | 1:2   | H          | --                                    | CPME (3.0)                            | -10           | 10                     | 87/77               | 1:1             |
| 10              | 1:2   | H          | --                                    | MTBE (3.0)                            | -10           | 35                     | 87/77               | 1:1             |
| 11              | 1:2   | H          | --                                    | CH <sub>2</sub> Cl <sub>2</sub> (3.0) | -10           | 10                     | 80/64               | 1:1             |
| 12              | 1:2   | H          | --                                    | toluene (3.0)                         | -10           | N.R.                   | N.D.                | N.D.            |
| 13              | 1:2   | H          | --                                    | DME (3.0)                             | -10           | 50                     | 76/25               | 1:3             |
| 14              | 1:2   | H          | TBAB (20)                             | THF (3.0)                             | -10           | 55                     | 84/59               | 2.2:1           |
| 15              | 1:2   | H          | NaH <sub>2</sub> PO <sub>4</sub> (20) | THF (3.0)                             | -10           | 45                     | 86/61               | 1.6:1           |
| 16              | 1:2   | H          | Na <sub>2</sub> HPO <sub>4</sub> (20) | THF (3.0)                             | -10           | 60                     | 90/70               | 1.5:1           |
| 17              | 1:2   | H          | Na <sub>2</sub> HPO <sub>4</sub> (20) | THF (3.0)                             | -20           | 50                     | 91/72               | 2.3:1           |
| 18              | 1:2   | H          | Na <sub>2</sub> HPO <sub>4</sub> (20) | THF (3.0)                             | -30           | 40                     | 93/73               | 3.4:1           |
| 19              | 1:2   | H          | Na <sub>2</sub> HPO <sub>4</sub> (20) | THF (3.0)                             | -40           | 30                     | 91/75               | 3.2:1           |
| 20              | 1:2   | H          | Na <sub>2</sub> HPO <sub>4</sub> (40) | THF (3.0)                             | -20           | 60                     | 93/70               | 2.2:1           |
| 21              | 1:2   | H          | Na <sub>2</sub> HPO <sub>4</sub> (60) | THF (3.0)                             | -20           | 60                     | 93/75               | 1.9:1           |
| 22              | 1:2   | H          | Na <sub>2</sub> HPO <sub>4</sub> (80) | THF (3.0)                             | -20           | 50                     | 93/79               | 2.3:1           |
| 23 <sup>f</sup> | 1:2   | H          | Na <sub>2</sub> HPO <sub>4</sub> (20) | THF (3.0)                             | -20           | 50                     | 92/70               | 2.3:1           |
| 24              | 1:2   | H          | Na <sub>2</sub> HPO <sub>4</sub> (20) | THF (1.0)                             | -20           | 70                     | 96/80               | 3.5:1           |
| 25              | 1:2   | H          | Na <sub>2</sub> HPO <sub>4</sub> (20) | THF (2.0)                             | -20           | 60                     | 96/81               | 2.7:1           |
| 26              | 1:2   | H          | Na <sub>2</sub> HPO <sub>4</sub> (20) | THF (5.0)                             | -20           | 25                     | 95/75               | 1.7:1           |
| 27              | 1:2   | 2-naphthyl | Na <sub>2</sub> HPO <sub>4</sub> (20) | THF (1.0)                             | -20           | 60                     | 95/78               | 8:1             |
| 28              | 1:2   | 2-Cl       | Na <sub>2</sub> HPO <sub>4</sub> (20) | THF (1.0)                             | -20           | 70                     | 95                  | >19:1           |

<sup>a</sup>0.05 mmol scale. <sup>b</sup>Determined by TLC analysis of the UV (254 nm) and Ce(SO<sub>4</sub>)<sub>2</sub> solution-staining signals between olefin and product. <sup>c</sup>Enantiomeric excesses were determined by HPLC analysis on a chiral stationary phase. <sup>d</sup>Determined by <sup>1</sup>H-NMR analysis of the crude reaction mixture. <sup>f</sup>20 mol% **C3** was used. DME = 1,2-dimethoxyethane.



**Table S5. Optimization of the reaction conditions with respect to arylethylenes–part II<sup>a</sup>**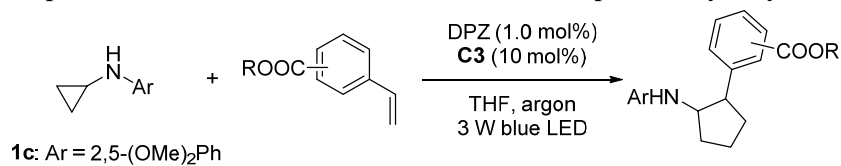

| entry | COOR              | <i>T</i> (°C) | <i>t</i> (h) | conv. (%) <sup>b</sup> | ee (%) <sup>c</sup> | dr <sup>d</sup> |
|-------|-------------------|---------------|--------------|------------------------|---------------------|-----------------|
| 1     | 3-COOMe           | -40           | 24           | 10                     | 26/47               | 1:1.6           |
| 2     | 4-COOMe           | 25            | 17           | 50                     | 23/14               | 1:1             |
| 3     | 4-COOMe           | -30           | 17           | 35                     | 77/50               | 1:1             |
| 4     | 4-COOMe           | -40           | 17           | 25                     | 68/70               | 1:1             |
| 5     | 4-COOMe           | -50           | 17           | 20                     | 71/82               | 1:1             |
| 6     | 4-COO <i>t</i> Bu | -50           | 17           | 10                     | 68/72               | 1:1             |
| 7     | 4-COOPh           | -50           | 17           | 30                     | 71/82               | 1:1             |
| 8     | 4-COOBn           | -50           | 17           | 15                     | 62/42               | 3:1             |

<sup>a</sup>Reactions were performed with **1c** (0.085 mmol), olefin (0.05 mmol), DPZ (0.5 mol%) in 1.0 mL THF. <sup>b</sup>Determined by TLC analysis of the UV (254 nm) and Ce(SO<sub>4</sub>)<sub>2</sub> solution-staining signals between olefin and product. <sup>c</sup>Enantiomeric excesses were determined by HPLC analysis on a chiral stationary phase. <sup>d</sup>Determined by <sup>1</sup>H-NMR analysis of the crude reaction mixture.

**Table S6. Optimization of the reaction conditions with respect to arythylenes–part III<sup>a</sup>**

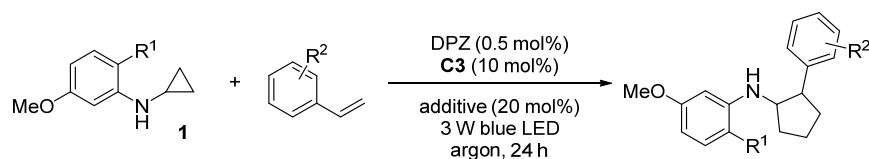

| entry | R <sup>1</sup> | R <sup>2</sup>                            | additive                         | solvent (mL)             | T (°C) | conv. (%) <sup>b</sup> | ee (%) <sup>c</sup> | dr <sup>d</sup> |
|-------|----------------|-------------------------------------------|----------------------------------|--------------------------|--------|------------------------|---------------------|-----------------|
| 1     | H              | 2-OCOPh                                   | --                               | THF (1.0)                | 25     | 25                     | 24/9                | 2:1             |
| 2     | H              | 2-OCOBn                                   | --                               | THF (1.0)                | 25     | 30                     | 28/25               | 2:1             |
| 3     | H              | 2-OCO <sup>t</sup> Bu                     | --                               | THF (1.0)                | 25     | 20                     | 11/5                | 2:1             |
| 4     | H              | 3-OCOMe                                   | --                               | THF (1.0)                | 25     | 30                     | 20/15               | 1:1             |
| 5     | H              | 4-OCOMe                                   | --                               | THF (1.0)                | 25     | 50                     | 12/13               | 1.2:1           |
| 6     | H              | 2-OCOMe                                   | --                               | THF (1.0)                | 10     | 30                     | 33/23               | 2:1             |
| 7     | H              | 2-OCOMe                                   | --                               | THF (1.0)                | -20    | 20                     | 40/25               | 2:1             |
| 8     | H              | 2-OCOMe                                   | --                               | THF (1.0)                | -30    | 15                     | 44/35               | 2:1             |
| 9     | H              | 2-OCOMe                                   | --                               | THF (1.0)                | -40    | 10                     | 46/37               | 3:1             |
| 10    | OMe            | 2-OCOMe                                   | --                               | THF (1.0)                | -40    | 20                     | 56/39               | 3:1             |
| 11    | OMe            | 2-OCOMe                                   | --                               | DCM (1.0)                | -40    | 10                     | 7/3                 | 1:1             |
| 12    | OMe            | 2-OCOMe                                   | --                               | toluene (1.0)            | -40    | 10                     | 39/37               | 2:1             |
| 13    | OMe            | 2-OCOMe                                   | --                               | CH <sub>3</sub> CN (1.0) | -40    | 10                     | 17/19               | 2:1             |
| 14    | OMe            | 2-OCOMe                                   | --                               | CPME (1.0)               | -40    | 10                     | 12/20               | 2:1             |
| 15    | OMe            | 2-OTf                                     | --                               | THF (1.0)                | -40    | 40                     | 72                  | >19:1           |
| 16    | OMe            | 3-OTf                                     | --                               | THF (1.0)                | -40    | 50                     | 74/52               | 1.6:1           |
| 17    | OMe            | 4-OTf                                     | --                               | THF (1.0)                | -40    | 50                     | 17/13               | 3:1             |
| 18    | OMe            | 2-OMs                                     | --                               | THF (1.0)                | -40    | 30                     | 63/66               | 4:1             |
| 19    | OMe            | 2-OSO <sub>2</sub> Cy                     | --                               | THF (1.0)                | -40    | N.R.                   | N.A.                | N.A.            |
| 20    | OMe            | 2-OSO <sub>2</sub> Bn                     | --                               | THF (1.0)                | -40    | 30                     | 70/68               | 4:1             |
| 21    | OMe            | 2-OTs                                     | --                               | THF (1.0)                | -40    | 30                     | 65                  | >19:1           |
| 22    | OMe            | 2-OSO <sub>2</sub> Ph(4-CF <sub>3</sub> ) | --                               | THF (1.0)                | -40    | 30                     | 66/35               | 10:1            |
| 23    | OMe            | 2-OSO <sub>2</sub> Ph(4-OMe)              | --                               | THF (1.0)                | -40    | 40                     | 70/53               | 9:1             |
| 24    | OMe            | 2-OSO <sub>2</sub> Ph(3-OMe)              | --                               | THF (1.0)                | -40    | 50                     | 70                  | >19:1           |
| 25    | OMe            | 2-OSO <sub>2</sub> Ph(2-OMe)              | --                               | THF (1.0)                | -40    | 20                     | 66/83               | 4:1             |
| 26    | OMe            | 2-OSO <sub>2</sub> Ph(2-CF <sub>3</sub> ) | --                               | THF (1.0)                | -40    | 5                      | 31/25               | 12:1            |
| 27    | OMe            | 2-OTf                                     | Li <sub>2</sub> CO <sub>3</sub>  | THF (1.0)                | -40    | 40                     | 3/3                 | 1.5:1           |
| 28    | OMe            | 2-OTf                                     | Na <sub>2</sub> CO <sub>3</sub>  | THF (1.0)                | -40    | 40                     | 49/30               | 1.5:1           |
| 29    | OMe            | 2-OTf                                     | K <sub>2</sub> CO <sub>3</sub>   | THF (1.0)                | -40    | 60                     | 0/0                 | 1.5:1           |
| 30    | OMe            | 2-OTf                                     | Cs <sub>2</sub> CO <sub>3</sub>  | THF (1.0)                | -40    | 35                     | 0/13                | 3.5:1           |
| 31    | OMe            | 2-OTf                                     | NaF                              | THF (1.0)                | -40    | 20                     | 75                  | >19:1           |
| 32    | OMe            | 2-OTf                                     | NaCl                             | THF (1.0)                | -40    | 35                     | 50                  | >19:1           |
| 33    | OMe            | 2-OTf                                     | NaBr                             | THF (1.0)                | -40    | 35                     | 72                  | >19:1           |
| 34    | OMe            | 2-OTf                                     | NaH <sub>2</sub> PO <sub>4</sub> | THF (1.0)                | -40    | 30                     | 74                  | >19:1           |
| 35    | OMe            | 2-OTf                                     | Na <sub>3</sub> PO <sub>4</sub>  | THF (1.0)                | -40    | 50                     | 2/0                 | 4:1             |
| 36    | OMe            | 2-OTf                                     | NaPF <sub>6</sub>                | THF (1.0)                | -40    | N.R.                   | N.A.                | N.A.            |
| 37    | OMe            | 2-OTf                                     | NaOAc                            | THF (1.0)                | -40    | 30                     | 1/0                 | 3.9:1           |
| 38    | OMe            | 2-OTf                                     | LiF                              | THF (1.0)                | -40    | 20                     | 73                  | >19:1           |

|                 |     |       |                                 |           |     |    |       |        |
|-----------------|-----|-------|---------------------------------|-----------|-----|----|-------|--------|
| 39              | OMe | 2-OTf | KF                              | THF (1.0) | -40 | 40 | 12/4  | 4.9:1  |
| 40              | OMe | 2-OTf | MgF <sub>2</sub>                | THF (1.0) | -40 | 30 | 76    | >19:1  |
| 41              | OMe | 2-OTf | CaF <sub>2</sub>                | THF (1.0) | -40 | 20 | 76/69 | 3.9:1  |
| 42              | OMe | 2-OTf | ZnF <sub>2</sub>                | THF (1.0) | -40 | 30 | 76    | >19:1  |
| 43              | OMe | 2-OTf | KCl                             | THF (1.0) | -40 | 40 | 76    | >19:1  |
| 44              | OMe | 2-OTf | KBr                             | THF (1.0) | -40 | 25 | 74    | >19:1  |
| 45              | OMe | 2-OTf | K <sub>2</sub> HPO <sub>4</sub> | THF (1.0) | -40 | 30 | 61/11 | 15.7/1 |
| 46              | OMe | 2-OTf | KH <sub>2</sub> PO <sub>4</sub> | THF (1.0) | -40 | 20 | 75    | >19:1  |
| 47              | OMe | 2-OTf | K <sub>3</sub> PO <sub>4</sub>  | THF (1.0) | -40 | 30 | 76    | >19:1  |
| 48              | OMe | 2-OTf | KPF <sub>6</sub>                | THF (1.0) | -40 | 30 | 53/14 | 13.3:1 |
| 49 <sup>f</sup> | OMe | 2-OTf | KCl,<br>18-crown-6              | THF (1.0) | -40 | 50 | 76    | >19:1  |
| 50              | OMe | 2-OTf | 18-crown-6                      | THF (1.0) | -40 | 30 | 75    | >19:1  |

<sup>a</sup>Reactions were performed with **1** (0.085 mmol) and olefin (0.05 mmol). <sup>b</sup>Determined by TLC analysis of the UV (254 nm) and Ce(SO<sub>4</sub>)<sub>2</sub> solution-staining signals between olefin and product. <sup>c</sup>Enantiomeric excesses were determined by HPLC analysis on a chiral stationary phase. <sup>d</sup>Determined by <sup>1</sup>H-NMR or <sup>19</sup>F-NMR analysis of the crude reaction mixture. <sup>f</sup>After careful investigation, the amount of KCl was determined to 0.55 equivalents. For 18-crown-6, 20 mol% was used.

**Comments:** The use of 0.55 equiv. of KCl and 20 mol% 18-crown-6 as additives could afford corresponding product in 76% ee and >19:1 dr. Among them, KCl is responsible for improving the enantioselectivity, and 18-crown-6 can slightly increase the chemical conversion, likely due to the ability to improve the solubility of KCl in the reaction system. Given only moderate enantioselectivity obtained, the *N*-protecting group of cyclopropyl amine has to be further modified.

**Table S7. Optimization of the reaction conditions with respect to arylenes–part IV<sup>a</sup>**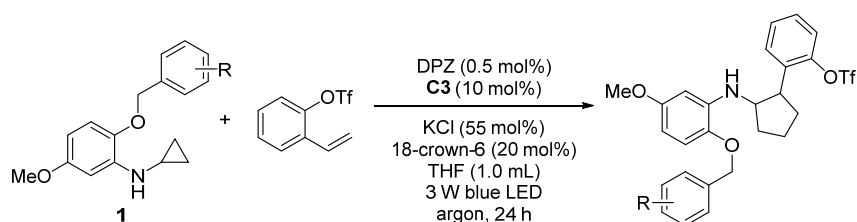

| entry | R                   | <i>T</i> (°C) | conv. (%) <sup>b</sup> | ee (%) <sup>c</sup> | dr <sup>d</sup> |
|-------|---------------------|---------------|------------------------|---------------------|-----------------|
| 1     | H                   | −40           | 40                     | 80                  | >19:1           |
| 2     | H                   | −50           | 20                     | 85                  | >19:1           |
| 3     | 2-Me                | −50           | 20                     | 86                  | >19:1           |
| 4     | 2-Et                | −50           | 20                     | 88                  | >19:1           |
| 5     | 2-OMe               | −50           | 20                     | 78                  | >19:1           |
| 6     | 2-Cl                | −50           | 20                     | 81                  | >19:1           |
| 7     | 2,6-Me <sub>2</sub> | −50           | 20                     | 93                  | >19:1           |
| 8     | 3-Me                | −50           | 20                     | 82                  | >19:1           |
| 9     | 3-Cl                | −50           | 50                     | 70                  | >19:1           |
| 10    | 3-OMe               | −50           | 20                     | 66/83               | 11:1            |
| 11    | 4-Me                | −50           | 10                     | 31/25               | 16:1            |
| 12    | 4-Cl                | −50           | 20                     | 83                  | >19:1           |
| 13    | 4-F                 | −50           | 10                     | 78                  | >19:1           |
| 14    | 4-CF <sub>3</sub>   | −50           | 20                     | 75/60               | 9:1             |

<sup>a</sup>Reactions were performed with **1** (0.085 mmol) and olefin (0.05 mmol). <sup>b</sup>Determined by TLC analysis of the UV (254 nm) and Ce(SO<sub>4</sub>)<sub>2</sub> solution-staining signals between olefin and product.

<sup>c</sup>Enantiomeric excesses were determined by HPLC analysis on a chiral stationary phase.

<sup>d</sup>Determined by <sup>19</sup>F-NMR analysis of the crude reaction mixture.

**Comments:** While excellent enantioselectivity was achieved (entry 7), the reaction was sluggish, and the conversion could not be increased through prolonging the reaction time.



**Table S8. Optimization of the reaction conditions with respect to arylethylenes–part V<sup>a</sup>**

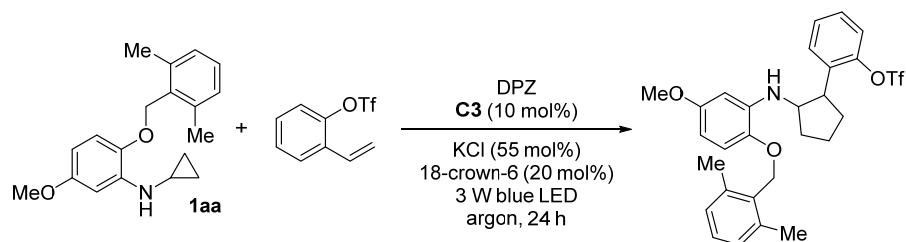

| entry           | mol% of DPZ | solvent (mL)      | <i>T</i> (°C) | conv. (%) <sup>b</sup> | ee (%) <sup>c</sup> | dr <sup>d</sup> |
|-----------------|-------------|-------------------|---------------|------------------------|---------------------|-----------------|
| 1               | 0.5         | THF (0.8)         | -50           | 50                     | 74                  | >19:1           |
| 2 <sup>e</sup>  | 0.5         | THF (1.0)         | -50           | 40                     | 78                  | >19:1           |
| 3 <sup>f</sup>  | 0.5         | THF (1.0)         | -50           | 50                     | 46                  | >19:1           |
| 4               | 0.5         | DCM (1.0)         | -50           | 20                     | 30                  | >19:1           |
| 5               | 0.5         | toluene (1.0)     | -50           | 20                     | 54                  | >19:1           |
| 6               | 0.5         | MTBE (1.0)        | -50           | N.R.                   | N.A.                | N.A.            |
| 7               | 0.5         | CPME (1.0)        | -50           | N.R.                   | N.A.                | N.A.            |
| 8               | 0.5         | 1,4-dioxane (1.0) | 10            | 20                     | 67                  | >19:1           |
| 9               | 0.5         | mesitylene (1.0)  | -50           | 10                     | 64                  | >19:1           |
| 10              | 0.5         | DME (1.0)         | -50           | 40                     | 90                  | >19:1           |
| 11              | 1.0         | THF (1.0)         | -50           | 20                     | 88                  | >19:1           |
| 12              | 1.0         | DME (1.0)         | -50           | 50                     | 87                  | >19:1           |
| 13              | 2.0         | DME (1.0)         | -50           | 60                     | 85                  | >19:1           |
| 14 <sup>e</sup> | 2.0         | DME (1.0)         | -50           | 80                     | 85                  | >19:1           |

<sup>a</sup>Reactions were performed with **1aa** (0.085 mmol) and olefin (0.05 mmol). <sup>b</sup>Determined by TLC analysis of the UV (254 nm) and Ce(SO<sub>4</sub>)<sub>2</sub> solution-staining signals between olefin and product.

<sup>c</sup>Enantiomeric excesses were determined by HPLC analysis on a chiral stationary phase.

<sup>d</sup>Determined by <sup>19</sup>F-NMR analysis of the crude reaction mixture. <sup>e</sup>2 x 3W blue LEDs. <sup>f</sup>3 x 3W blue LEDs.

**Table S9. Optimization of the reaction conditions with respect to 1,1-diaryl ethylenes<sup>a</sup>**

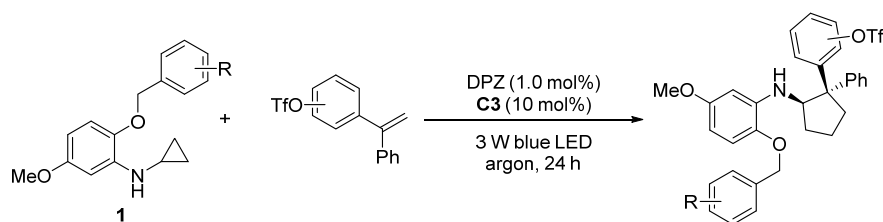

| entry          | R                   | position of OTf | solvent (mL)            | T (°C) | conv. (%) <sup>b</sup> | ee (%) <sup>c</sup> | dr <sup>d</sup> |
|----------------|---------------------|-----------------|-------------------------|--------|------------------------|---------------------|-----------------|
| 1 <sup>f</sup> | 2,6-Me <sub>2</sub> | <i>ortho</i>    | DME (2.0)               | 25     | 5                      | N.A.                | 2.6:1           |
| 2              | 2,6-Me <sub>2</sub> | <i>ortho</i>    | DME (2.0)               | -50    | <5                     | N.D.                | N.D.            |
| 3              | 2,6-Me <sub>2</sub> | <i>ortho</i>    | DME (2.0)               | -10    | 5                      | 97                  | >19:1           |
| 4              | 2,6-Me <sub>2</sub> | <i>ortho</i>    | DME (2.0)               | 25     | 20                     | 95                  | >19:1           |
| 5              | 2,6-Me <sub>2</sub> | <i>ortho</i>    | THF (2.0)               | 25     | 15                     | 92/35               | 5:1             |
| 6              | 2,6-Me <sub>2</sub> | <i>ortho</i>    | toluene (2.0)           | 25     | 20                     | 88                  | N.A.            |
| 7              | 2,6-Me <sub>2</sub> | <i>ortho</i>    | DCM (2.0)               | 25     | 20                     | 91                  | N.A.            |
| 8              | 2,6-Me <sub>2</sub> | <i>ortho</i>    | CHCl <sub>3</sub> (2.0) | 25     | N.R.                   | N.A.                | N.A.            |
| 9              | 2,6-Me <sub>2</sub> | <i>ortho</i>    | Et <sub>2</sub> O (2.0) | 25     | 10                     | 91                  | >19:1           |
| 10             | 2,6-Me <sub>2</sub> | <i>ortho</i>    | MeCN (2.0)              | 25     | 20                     | 87                  | >19:1           |
| 11             | 2,6-Me <sub>2</sub> | <i>ortho</i>    | CPME (2.0)              | 25     | 20                     | 87                  | 9:1             |
| 12             | 2,6-Me <sub>2</sub> | <i>ortho</i>    | MTBE (2.0)              | 25     | 20                     | 91                  | >19:1           |
| 14             | 2,6-Me <sub>2</sub> | <i>ortho</i>    | DME (2.0)               | 30     | 25                     | 94                  | >19:1           |
| 15             | 2,6-Me <sub>2</sub> | <i>ortho</i>    | DME (1.0)               | 35     | 30                     | 93/11               | 12:1            |
| 16             | 2,6-Me <sub>2</sub> | <i>ortho</i>    | DME (1.0)               | 40     | 40                     | 93/5                | 4:1             |
| 17             | 2,6-Me <sub>2</sub> | <i>ortho</i>    | DME (0.5)               | 35     | 50                     | 93/57               | 12:1            |
| 18             | H                   | <i>ortho</i>    | DME (0.5)               | 35     | 30                     | 91/76               | 6:1             |
| 19             | H                   | <i>meta</i>     | DME (0.5)               | 35     | 70                     | 90/85               | 3:1             |
| 20             | H                   | <i>para</i>     | DME (0.5)               | 35     | 70                     | 93/87               | 4:1             |

<sup>a</sup>Reactions were performed with **1** (0.085 mmol) and olefin (0.05 mmol). <sup>b</sup>Determined by TLC analysis of the UV (254 nm) and Ce(SO<sub>4</sub>)<sub>2</sub> solution-staining signals between olefin and product.

<sup>c</sup>Enantiomeric excesses were determined by HPLC analysis on a chiral stationary phase.

<sup>d</sup>Determined by <sup>19</sup>F-NMR analysis of the crude reaction mixture. <sup>e</sup>In the absence of **C3**.

**Comments:** For the olefins with *meta*-OTf and *para*-OTf on the aromatic ring (entries 19–20), when using *N*-protecting cyclopropyl amine **1aa** (entries 1–17) to react with them, both enantioselectivity and diastereoselectivity of products were deteriorated slightly. Meanwhile, although the diastereoselectivity of using the *ortho*-OTf olefin (entry 17) is better than that of other olefins (entries 19–20), the reaction is remarkably slower than the latter two chemical transformations.

### 3. General experimental procedures

(1)

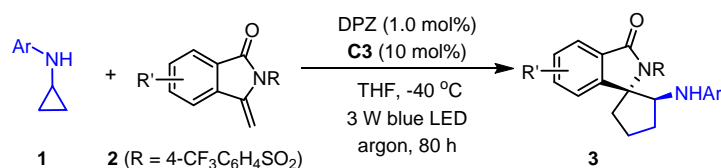

70.0  $\mu\text{L}$  (0.001 mmol, 0.01 equiv.) of DPZ solution (1.0 mg of DPZ in 200  $\mu\text{L}$  of toluene) was added into a 10 mL Schlenk tube, and then solvent was removed in *vacuo*.

For **3e–3u**: **1** (0.12 mmol, 1.2 equiv.), **2** (0.10 mmol, 1.0 equiv.), **C3** (0.01 mmol, 0.1 equiv.) and THF (2.0 mL) were sequentially added, degassed three times by freeze-pump-thaw method. The reaction mixture was stirred under an argon atmosphere at  $-40\text{ }^\circ\text{C}$ . Then irradiated by a 3 W blue LED ( $\lambda = 450\text{--}455\text{ nm}$ ) for another 80 h. The reaction mixture was directly loaded onto a short *silica gel* column, followed by gradient elution with petroleum ether/ethyl acetate (50/1–3/1 ratio). Removing the solvent in *vacuo*, afforded products **3e–3u**.

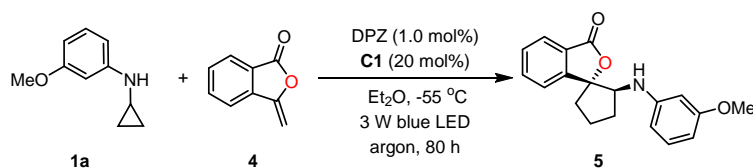

For **5**: **1a** (0.12 mmol, 1.2 equiv.), **4** (0.10 mmol, 1.0 equiv.), **C1** (0.02 mmol, 0.2 equiv.) and  $\text{Et}_2\text{O}$  (6.0 mL) were sequentially added, degassed three times by freeze-pump-thaw method. The reaction mixture was stirred under an argon atmosphere at  $-55\text{ }^\circ\text{C}$ . Then irradiated by a 3 W blue LED ( $\lambda = 450\text{--}455\text{ nm}$ ) for another 80 h. The reaction mixture was directly loaded onto a short *silica gel* column, followed by gradient elution with petroleum ether/ethyl acetate (50/1–3/1 ratio). Removing the solvent in *vacuo*, afforded products **5**.

(2)

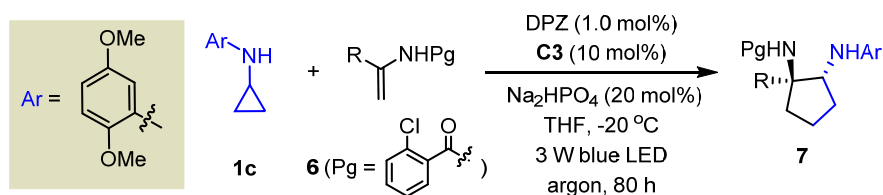

70.0  $\mu\text{L}$  (0.001 mmol, 0.01 equiv.) of DPZ solution (1.0 mg of DPZ in 200  $\mu\text{L}$  of toluene) was added into a 10 mL Schlenk tube, and then solvent was removed in *vacuo*.

For **7a–7m**: **1c** (0.10 mmol, 1.0 equiv.), **6** (0.20 mmol, 2.0 equiv), **C3** (0.01 mmol, 0.1 equiv.), NaH<sub>2</sub>PO<sub>4</sub> (0.02 mmol, 0.2 equiv.) and THF (2.0 mL) were sequentially added, degassed three times by freeze-pump-thaw method. The reaction mixture was stirred under an argon atmosphere at –20 °C. Then irradiated by a 3 W blue LED ( $\lambda = 450–455$  nm) for another 80 h. The reaction mixture was directly loaded onto a short *silica gel* column, followed by gradient elution with petroleum ether/ethyl acetate (50/1–3/1 ratio). Removing the solvent in *vacuo*, afforded products **7a–7m**.

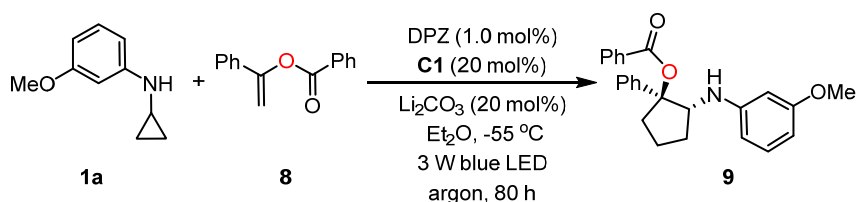

For **9**: **1a** (0.12 mmol, 1.2 equiv.), **8** (0.10 mmol, 1.0 equiv), **C1** (0.02 mmol, 0.2 equiv.), Li<sub>2</sub>CO<sub>3</sub> (0.02 mmol, 0.2 equiv.) and Et<sub>2</sub>O (4.0 mL) were sequentially added, degassed three times by freeze-pump-thaw method. The reaction mixture was stirred under an argon atmosphere at –55 °C. Then irradiated by a 3 W blue LED ( $\lambda = 450–455$  nm) for another 80 h. The reaction mixture was directly loaded onto a short *silica gel* column, followed by gradient elution with petroleum ether/ethyl acetate (50/1–3/1 ratio). Removing the solvent in *vacuo*, afforded products **9**.

(3)

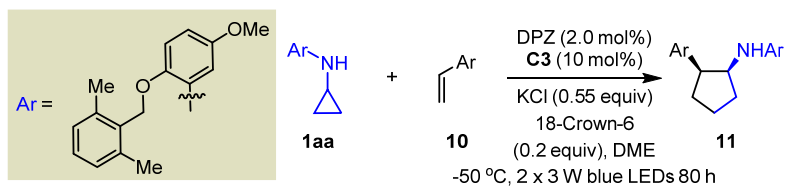

140.0  $\mu$ L (0.002 mmol, 0.02 equiv.) of DPZ solution (1.0 mg of DPZ in 200  $\mu$ L of toluene) was added into a 10 mL Schlenk tube, and then solvent was removed in *vacuo*.

For **11a–11i**: **1aa** (0.17 mmol, 1.7 equiv.), **10** (0.10 mmol, 1.0 equiv), **C3** (0.01 mmol, 0.1 equiv.), KCl (0.055 mmol, 0.55 equiv.), 18-Crown-6 (0.02 mmol, 0.2 equiv.) and DME (2.0 mL) were sequentially added, degassed three times by freeze-pump-thaw method. The reaction mixture was stirred under an argon atmosphere at –50 °C. Then irradiated by a 2  $\times$  3 W blue LED ( $\lambda = 450–455$  nm) for another 80 h. The reaction mixture was directly loaded onto a short *silica gel* column, followed by gradient elution with petroleum ether/ethyl acetate

(100/1–30/1 ratio). Removing the solvent in *vacuo*, afforded products **11a–11i**.

(4)

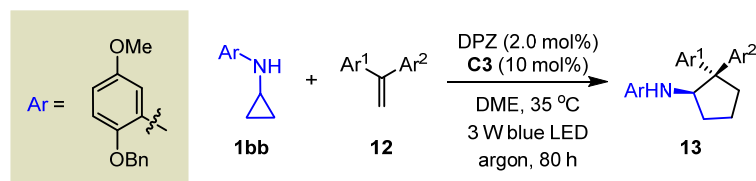

70.0  $\mu\text{L}$  (0.001 mmol, 0.01 equiv.) of DPZ solution (1.0 mg of DPZ in 200  $\mu\text{L}$  of toluene) was added into a 10 mL Schlenk tube, and then solvent was removed in *vacuo*.

For **13a–c**, **13k**, **13l**, **13z**: **1bb** (0.17 mmol, 1.7 equiv.), **10** (0.10 mmol, 1.0 equiv.), **C3** (0.01 mmol, 0.1 equiv.) and DME (1.0 mL) were sequentially added, degassed three times by freeze-pump-thaw method. The reaction mixture was stirred under an argon atmosphere at 35  $^\circ\text{C}$ . Then irradiated by a 3 W blue LED ( $\lambda = 450\text{--}455$  nm) for another 80 h. The reaction mixture was directly loaded onto a short *silica gel* column, followed by gradient elution with petroleum ether/ethyl acetate (100/1–30/1 ratio). Removing the solvent in *vacuo*, afforded products **13a–c**, **13k**, **13l**, **13z**.

140.0  $\mu\text{L}$  (0.002 mmol, 0.02 equiv.) of DPZ solution (1.0 mg of DPZ in 200  $\mu\text{L}$  of toluene) was added into a 10 mL Schlenk tube, and then solvent was removed in *vacuo*.

For **13d**, **13m**, **13n**, **13u–y**: **1bb** (0.17 mmol, 1.7 equiv.), **10** (0.10 mmol, 1.0 equiv.), **C3** (0.01 mmol, 0.1 equiv.) and DME (1.0 mL) were sequentially added, degassed three times by freeze-pump-thaw method. The reaction mixture was stirred under an argon atmosphere at 35  $^\circ\text{C}$ . Then irradiated by a 3 W blue LED ( $\lambda = 450\text{--}455$  nm) for another 80 h. The reaction mixture was directly loaded onto a short *silica gel* column, followed by gradient elution with petroleum ether/ethyl acetate (100/1–30/1 ratio). Removing the solvent in *vacuo*, afforded products **13d**, **13m**, **13n**, **13u–y**.

70.0  $\mu\text{L}$  (0.001 mmol, 0.01 equiv.) of DPZ solution (1.0 mg of DPZ in 200  $\mu\text{L}$  of toluene) was added into a 10 mL Schlenk tube, and then solvent was removed in *vacuo*.

For **13e–j**: **1bb** (0.17 mmol, 1.7 equiv.), **10** (0.10 mmol, 1.0 equiv.), **C3** (0.01 mmol, 0.1 equiv.) and DME (1.0 mL) were sequentially added, degassed three times by freeze-pump-thaw method. The reaction mixture was stirred under an argon atmosphere at 25  $^\circ\text{C}$ . Then irradiated by a 3 W blue LED ( $\lambda = 450\text{--}455$  nm) for another 80 h. The reaction mixture was directly

loaded onto a short *silica gel* column, followed by gradient elution with petroleum ether/ethyl acetate (100/1–30/1 ratio). Removing the solvent in *vacuo*, afforded products **13e–j**.

140.0  $\mu\text{L}$  (0.002 mmol, 0.02 equiv.) of DPZ solution (1.0 mg of DPZ in 200  $\mu\text{L}$  of toluene) was added into a 10 mL Schlenk tube, and then solvent was removed in *vacuo*.

For **13o–t**: **1bb** (0.17 mmol, 1.7 equiv.), **10** (0.10 mmol, 1.0 equiv), **C3** (0.01 mmol, 0.1 equiv.) and DME (1.0 mL) were sequentially added, degassed three times by freeze-pump-thaw method. The reaction mixture was stirred under an argon atmosphere at 25 °C. Then irradiated by a 3 W blue LED ( $\lambda = 450\text{--}455\text{ nm}$ ) for another 80 h. The reaction mixture was directly loaded onto a short *silica gel* column, followed by gradient elution with petroleum ether/ethyl acetate (100/1–30/1 ratio). Removing the solvent in *vacuo*, afforded products **13o–t**.

## 4. Mechanism studies

### (1) Linear effect experiments

These reactions were conducted according to the general procedure (see Section 3.1 in SI). Chiral HPLC analyses gave linear effect data (see page S209–212 for the detailed HPLC results).

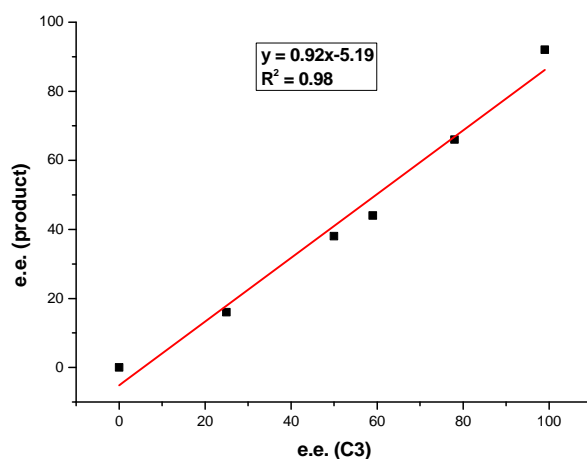

**Fig. S1.** Relationship between ee values of **C3** and **3e**.

**Comments:** From the results that determine a linear correlation between ee of CPA **C3** and ee of **3e** (Fig. S1), it could conclude that only a single molecule of the chiral phosphate is involved in the C–C bond-forming step.

### (2) Emission quenching experiments

#### The Luminescence Quenching Experiments of DPZ (excitation wavelength = 448 nm)

Emission intensities were recorded on a spectrofluorometer. **DPZ** solution was excited at 448 nm and the emission intensity at 525 nm was observed. A solution of **DPZ** ( $1.0 \times 10^{-5}$  M) was added to the appropriate amount of quencher in 3.0 mL volumetric flask under  $N_2$ . The solution was transferred to a 3.0 mL quartz cell and the emission spectrum of the sample was collected.

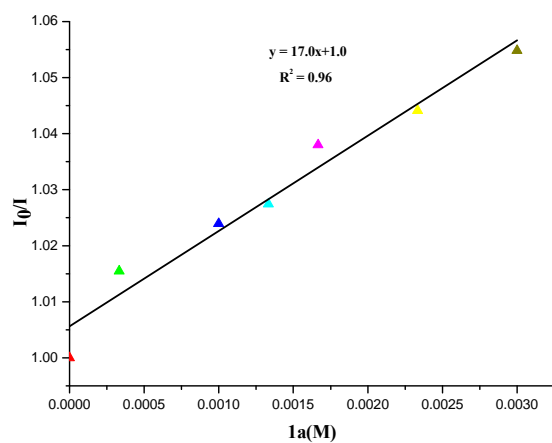

**Fig. S2.** Stern–Volmer quenching experiment of DPZ and **1a**.

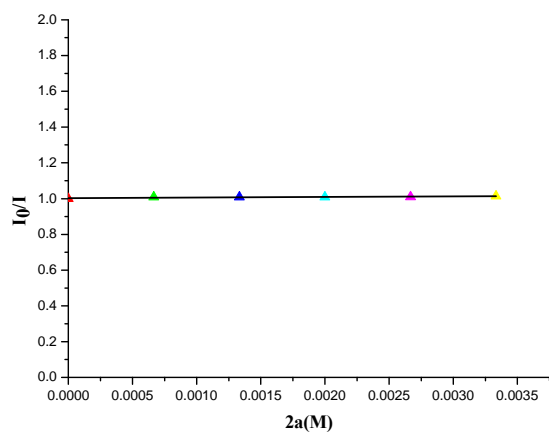

**Fig. S3.** Stern–Volmer quenching experiment of DPZ and **2e**. No quenching observed.

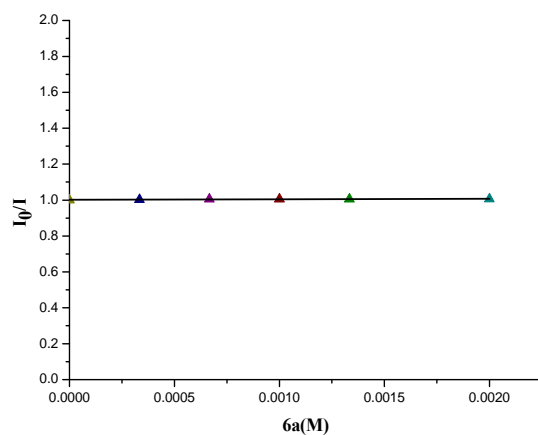

**Fig. S4.** Stern–Volmer quenching experiment of DPZ and **6a**. No quenching observed.



### (3) Cyclic voltammetry measurement

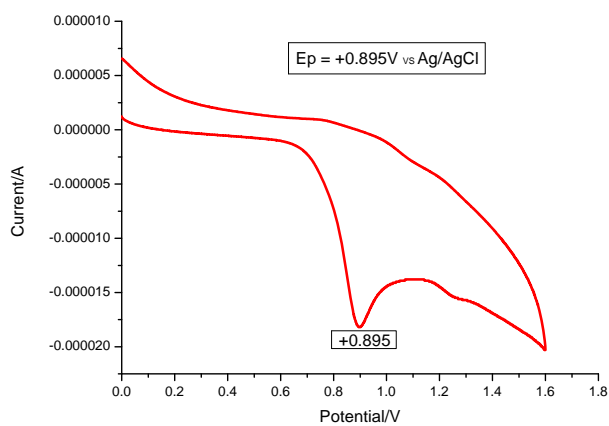

**Fig. S5.** Cyclic voltammogram of **1a** in MeCN.

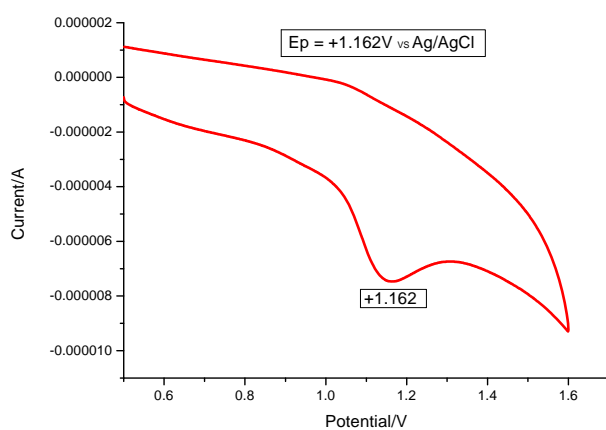

**Fig. S6.** Cyclic voltammogram of **2e** in MeCN.

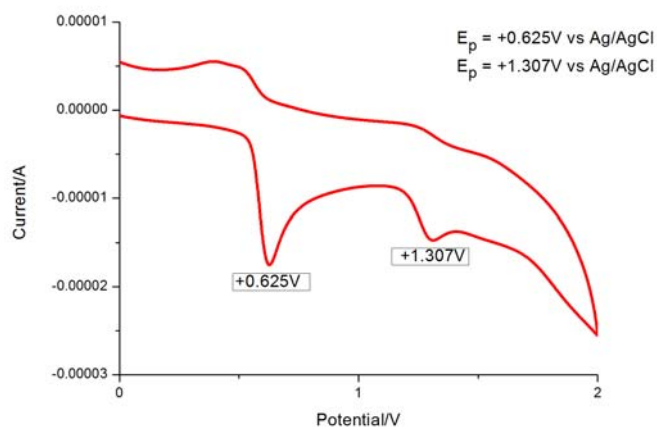

**Fig. S7.** Cyclic voltammogram of **1aa** in MeCN.

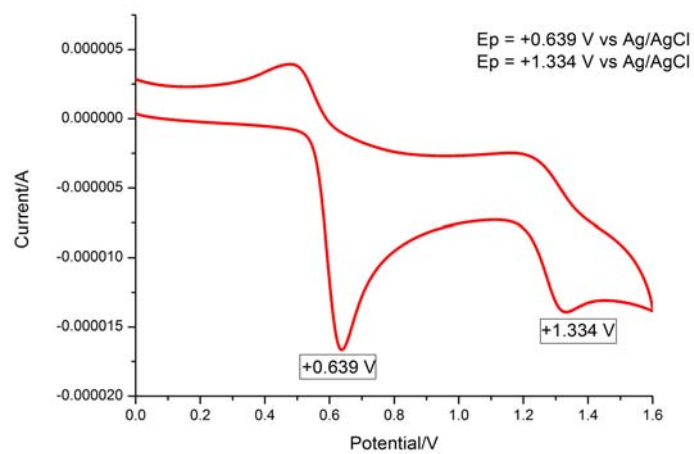

**Fig. S8.** Cyclic voltammogram of **4a** in MeCN.

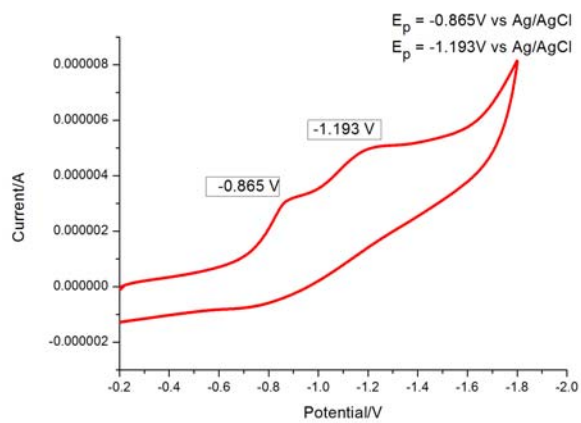

**Fig. S9.** Cyclic voltammogram of **5a** in MeCN.

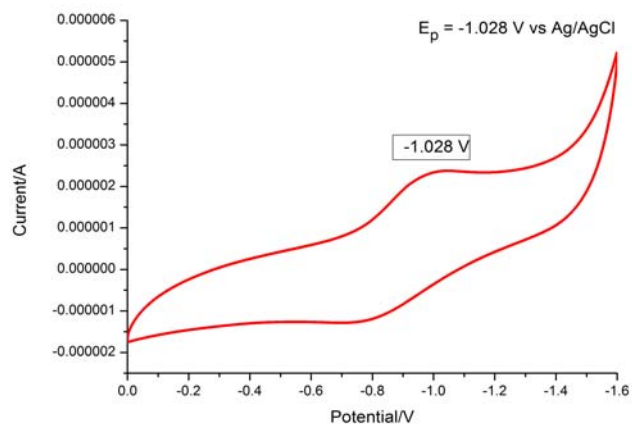

**Fig. S10.** Cyclic voltammogram of **10a** in MeCN.

#### (4) Quantum yield measurement (Blue LED)

##### Determination of the light intensity at 445 nm:

The photon flux of the spectrophotometer was determined by standard ferrioxalate actinometry. A 0.15 M solution of ferrioxalate was prepared by dissolving 2.21 g of potassium ferrioxalate hydrate in 30 mL of 0.05 M H<sub>2</sub>SO<sub>4</sub>. A buffered solution of phenanthroline was prepared by dissolving 50 mg of phenanthroline and 11.25 g of sodium acetate in 50 mL of 0.5M H<sub>2</sub>SO<sub>4</sub>. Both solutions were stored in the dark. To determine the photon flux of the spectrophotometer, 6.0 mL of the ferrioxalate solution was placed in a cuvette and irradiated for 360.0 seconds at  $\lambda = 445$  nm with an emission slit width at 10.0 nm. After irradiation, 3.0 mL irradiated solution of the ferrous ions and 0.6 mL of the phenanthroline solution was added to the cuvette. The solution was then allowed to rest for 1 h to allow the ferrous ions to completely coordinate to the phenanthroline. The absorbance of the solution was measured at 510 nm. A non-irradiated sample was also prepared and the absorbance at 510 nm measured. Conversion was calculated using eq 1.

$$\begin{aligned} \text{mol Fe}^{2+} &= \frac{V_1 \times V_3 \times \Delta A(510\text{nm})}{10^3 \times V_2 \times \epsilon(510\text{nm})} \\ &= \frac{6 \times 3.6 \times 0.959}{10^3 \times 3 \times 1 \times 11100} = 6.2277 \times 10^{-7} \text{ mol} \end{aligned} \quad (1)$$

Where  $V_1$  is the irradiated volume (6 mL),  $V_2$  is the aliquot of the irradiated solution taken for the determination of the ferrous ions (3 mL),  $V_3$  is the final volume after complexation with phenanthroline (3.6 mL),  $l$  is the optical path-length of the irradiation cell (1 cm),  $\Delta A(510\text{nm})$  is the optical difference in absorbance between the irradiated solution and that taken in the dark,  $\epsilon(510\text{nm})$  is that of the complex  $\text{Fe}(\text{phen})_3^{2+}$  ( $11100 \text{ L mol}^{-1} \text{ cm}^{-1}$ ). The photon flux can be calculated using eq 2.

$$\begin{aligned} \text{photon flux} &= \frac{\text{mol Fe}^{2+}}{t \cdot f} \\ &= \frac{6.2277 \times 10^{-6} \text{ mol}}{0.92 \times 360 \text{ s} \times 0.9968} \\ &= 1.8864 \times 10^{-9} \text{ photons/s} \end{aligned} \quad (2)$$

Where  $\phi$  is the quantum yield for the ferrioxalate actinometer (0.92 at  $\lambda = 445\text{nm}$ ),  $t$  is the time (360.0 s), and  $f$  is the fraction of light absorbed at  $\lambda = 445\text{nm}$  (0.9968, *vide infra*). The

photon flux was calculated (average of three experiments) to be  $1.8864 \times 10^{-9}$  einstein  $s^{-1}$ .

**Determination of fraction of light absorbed at 445 nm for the ferrioxalate solution:**

The absorbance of the above ferrioxalate solution at 445 nm was measured to be 2.50. The fraction of light absorbed (f) by this solution was calculated using eq 3, where A is the measured absorbance at 445 nm.

$$\begin{aligned} f &= 1 - 10^{-A} \\ &= 1 - 10^{-2.50} = 0.9968 \end{aligned} \quad (3)$$

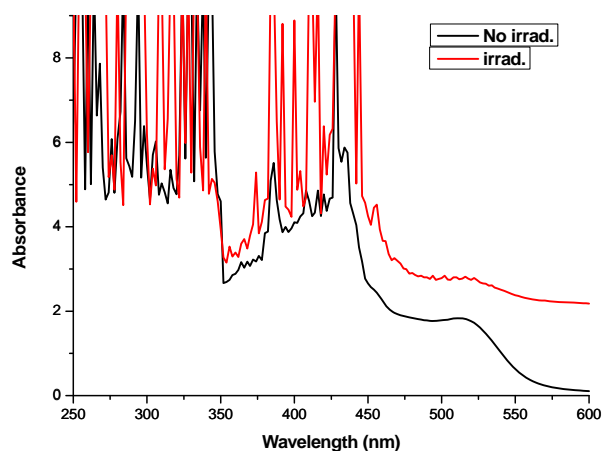

**Fig. S11.** Absorption spectra of the irradiation experiment and non-irradiation experiment

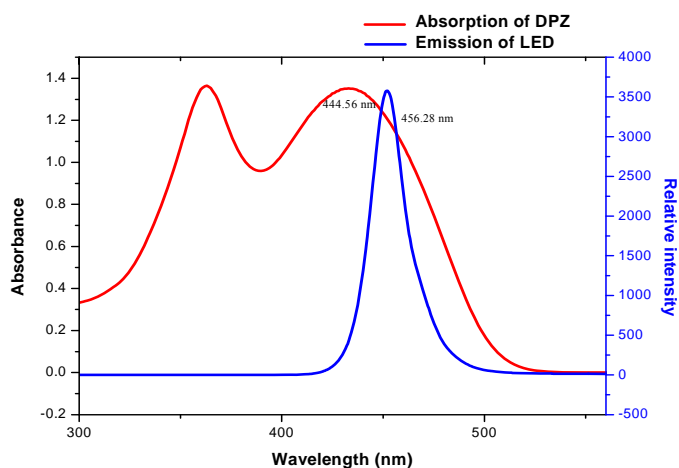

**Fig. S12.** Absorption spectra of 0.005 M solution of DPZ in THF

**Determination of the reaction quantum yield**

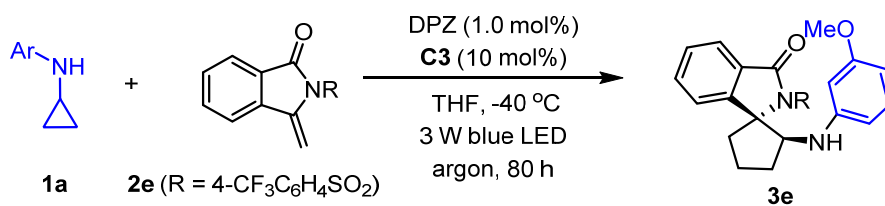

The reaction mixture was stirred and irradiated by 3W Blue LED ( $\lambda_{\text{max}} = 445 \text{ nm}$ ) for 12 h (43200 s). The yield of product was determined from the isolated compounds following chromatographic purification. The yield of **3e** was determined to be 22% ( $0.022 \times 10^{-3} \text{ mol}$  of **3e**). The reaction quantum yield ( $\Phi$ ) was determined using eq 4 where the photon flux is  $1.8864 \times 10^{-9} \text{ einstein s}^{-1}$  (determined by actinometry as described above),  $t$  is the reaction time (43200 s) and  $f$  is the fraction of incident light absorbed by the catalyst, determined using eq 3. An absorption spectrum of DPZ (0.005 M) gave an absorbance value of 1.296 at 445 nm (figure S2), indicating that the fraction of light absorbed by the photocatalyst ( $f$ ) is 0.949.

$$F = \frac{\text{mol of product}}{\text{mol of catalyst} \times H \times f} \quad (4)$$

$$12 \text{ h: } F = \frac{0.022 \times 10^{-3} \text{ mol}}{(1.8864 \times 10^{-9} \text{ einstein s}^{-1}) \times 43200 \text{ H} \times 0.949} = 0.284$$

The reaction quantum yield ( $\Phi$ ) was calculated to be 0.284.

## (5) Computation Details

All the calculations in this work were performed on the basis of density functional theory (DFT) in the Gaussian G16 package (Revision B.01).<sup>1</sup> Geometry optimizations and frequencies were calculated with the B3LYP,<sup>2</sup> dispersion-corrected with the D3 version of Grimme's dispersion with Becke-Johnson damping (B3LYP-D3(BJ))<sup>3</sup> and a basis set of 6-31G(d, p).<sup>4</sup> All of the optimized geometries had been characterized as minima (zero imaginary frequencies) or transition state structures (a single imaginary frequency) at the same level of theory. Intrinsic reaction coordinate (IRC)<sup>5</sup> calculations were also carried out to inspect whether each of the transition structures actually connected the proposed reactant and product. For the four key transition states, the solvent tetrahydrofuran ( $\epsilon = 7.43$ ) was evaluated by single-point energy calculation with SMD solvation model<sup>6</sup> using M06-2X

functional method<sup>7</sup> on the basis sets of 6-31+G(d, p). Noncovalent interactions (NCI) analysis<sup>8</sup> was employed to gain more insights into the important noncovalent interactions that are present in the key transition states. The key 3D structures were prepared using the CYL view visualization program.<sup>9</sup>

### 5.1 The radical addition and cyclization processes of substrate olefin 12c

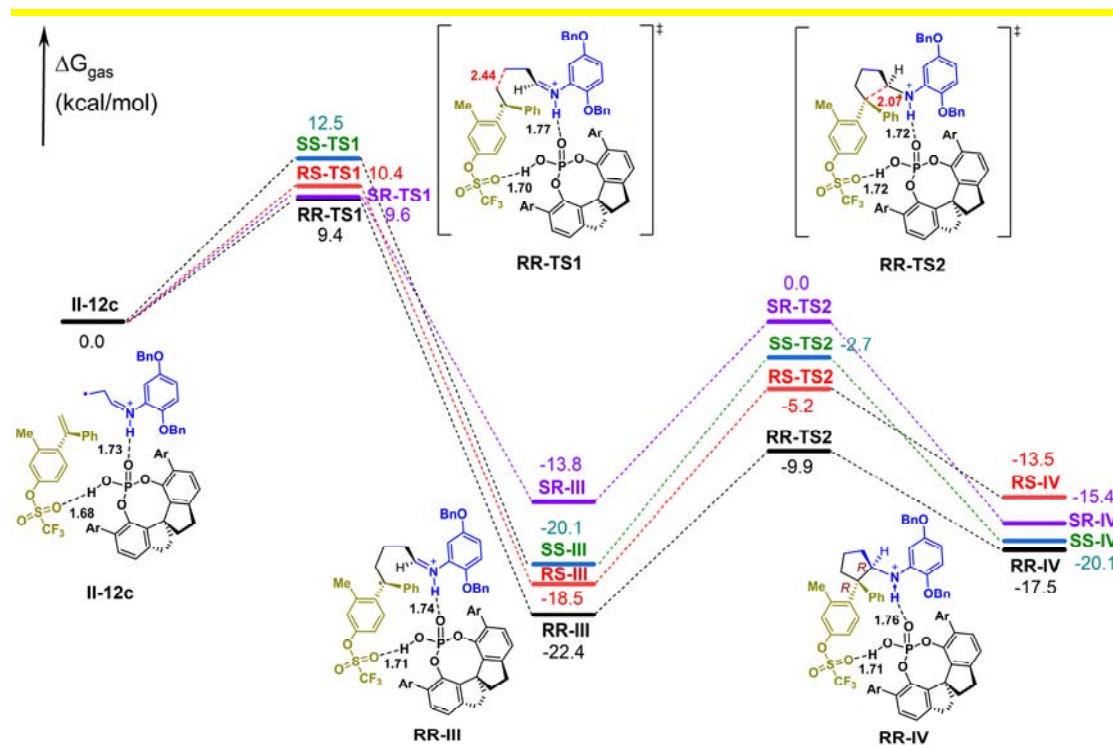

**Fig. S13.** Free energy profiles for the radical addition and cyclization processes calculated with CPA catalyst. For clarify, only the structures of RR-pathway are shown. Computational method: B3LYP-D3/6-31G(d,p) level of theory in gas phase.

### 5.2 NCI analysis for the two transition states

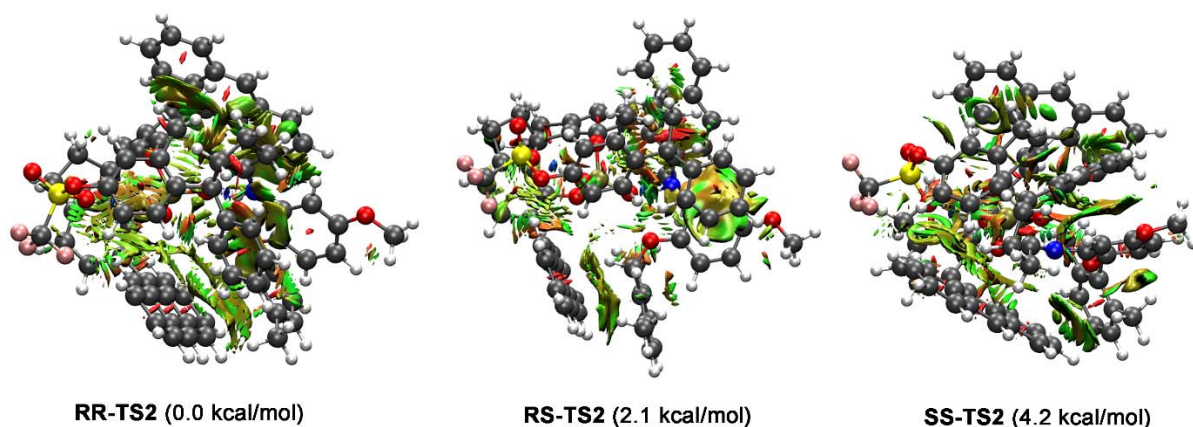

**Fig. S14.** Transition states for the major RR-TS2, minor RS-TS2 and SS-TS2 enantiomers featuring multiple noncovalent interactions (hydrogen bonds, C-H...F, C-H... $\pi$  and  $\pi$ ... $\pi$

interactions) (blue, strongly attractive; green, weakly attractive; red, strongly repulsive).  
 Computational method: SMD//M062X/6-31+G(d,p)//B3LYP-D3/6-31G(d,p) level of theory  
 in solvent tetrahydrofuran.

### 5.3 NPA charges on olefins

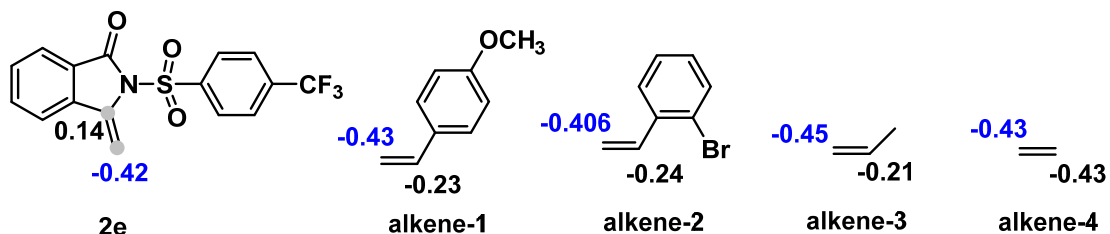

Fig. S15. Computed skeletons of five types of olefins.

Natural population analysis (NPA) charge analysis showed that the charge on the terminal carbon in **2e** (−0.42) is similar with the charge on the terminal carbon (−0.43) in electron-rich **alkene-1**, of which the poor reactivity with cyclopropylanilines as the reaction partners has been shown by Zheng and co-workers (ref. 19 in the manuscript).

### 5.4 The cascade radical addition and cyclization process of the reaction of **2d**

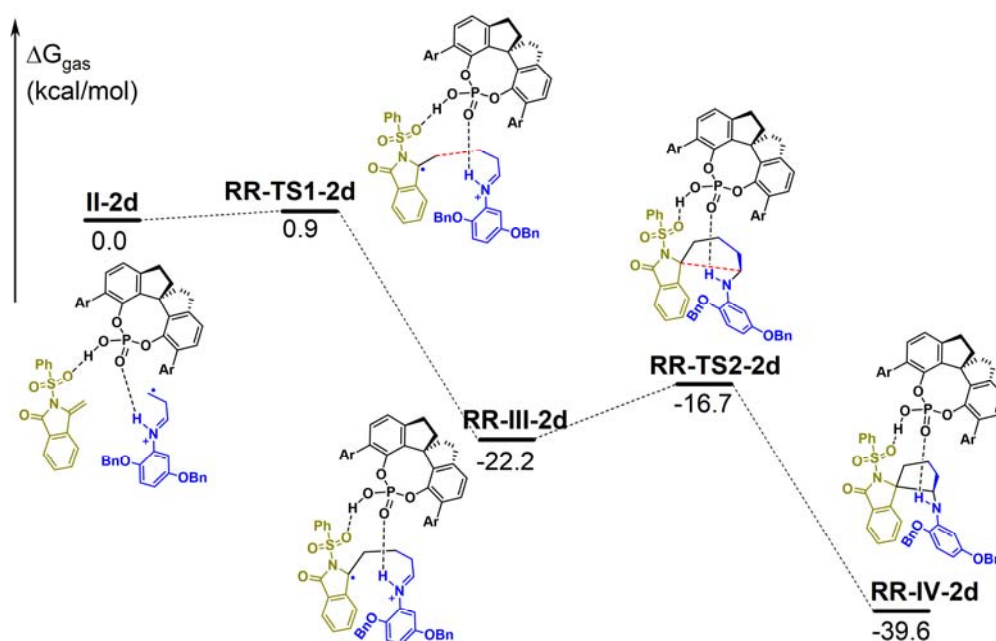

Fig. S16. Free energy profiles for the radical addition and cyclization processes of the substrate olefin **2d**.

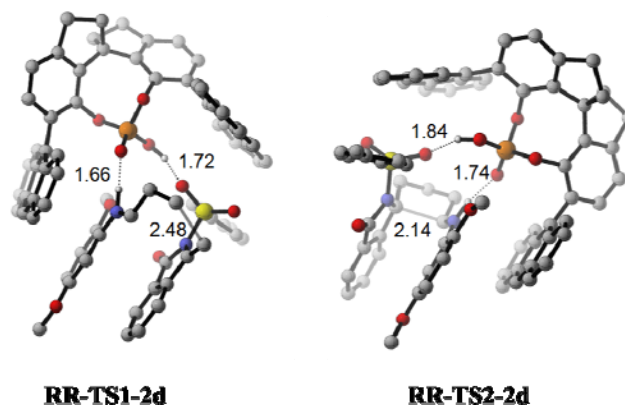

**Fig. S17.** Computed structures of the two key transition states.

To get more information about the mode of stereocontrol of the electron-rich olefins bearing heteroatom-containing and electron-withdrawing as protect groups, the radical addition and cyclization process of the substrate **2d** was investigated by DFT calculations at B3LYP-D3/6-31G(d,p) level of theory. The free energy profile for the pathway leading to favored stereoisomer product is shown in Figure S16. The energy barriers of radical addition and cyclization processes were 0.9 and 5.5 kcal/mol. DFT calculations indicate that the H-bonds O-H $\cdots$ O between the phosphate hydroxyl and the S=O oxygen of OTf and N-H $\cdots$ O between the substrate amidogen and P=O oxygen of the phosphate were present in both two transition states **RR-TS1-2d** and **RR-TS2-2d** (Fig. S17), which plays a significant role in facilitating sufficient enantiocontrol.

## 5.5 Reference

1. Frisch, M. J.; Trucks, G. W.; Schlegel, H. B.; Scuseria, G. E.; Robb, M. A.; Cheeseman, J. R.; Scalmani, G.; Barone, V.; Mennucci, B.; Petersson, G. A.; Nakatsuji, H.; Caricato, M.; Li, X.; Hratchian, H. P.; Izmaylov, A. F.; Bloino, J.; Zheng, G.; Sonnenberg, J. L.; Hada, M.; Ehara, M.; Toyota, K.; Fukuda, R.; Hasegawa, J.; Ishida, M.; Nakajima, T.; Honda, Y.; Kitao, O.; Nakai, H.; Vreven, T.; Montgomery, J. A., Jr.; Peralta, J. E.; Ogliaro, F.; Bearpark, M.; Heyd, J. J.; Brothers, E.; Kudin, K. N.; Staroverov, V. N.; Kobayashi, R.; Normand, J.; Raghavachari, K.; Rendell, A.; Burant, J. C.; Iyengar, S. S.; Tomasi, J.; Cossi, M.; Rega, N.; Millam, N. J.; Klene, M.; Knox, J. E.; Cross, J. B.; Bakken, V.; Adamo, C.; Jaramillo, J.; Gomperts, R.; Stratmann, R. E.; Yazyev, O.; Austin, A. J.; Cammi, R.; Pomelli, C.; Ochterski, J. W.; Martin, R. L.; Morokuma, K.; Zakrzewski, V. G.; Voth, G. A.; Salvador, P.; Dannenberg, J. J.; Dapprich, S.; Daniels, A. D.; Farkas, Ö.; Foresman, J. B.; Ortiz, J. V.; Cioslowski, J.; Fox, D. J. *Gaussian 16, Revision B.01*; Gaussian, Inc.: Wallingford, CT, 2016.



2. (a) Becke, A. D. *Phys. Rev. A* **1988**, *38*, 3098–3100. (b) Becke, A. D. *J. Chem. Phys.* **1993**, *98*, 5648-5652. (c) Lee, C.; Yang, W.; Parr, R. G. *Phys. Rev. B* **1988**, *37*, 785–789.
3. Grimme, S.; Antony, J.; Ehrlich, S.; Krieg, H. *J. Chem. Phys.* **2010**, *132*, 154104.
4. Hehre, W. J.; Ditchfield, R.; Pople, J. A. *J. Chem. Phys.* **1972**, *56*, 2257–2261.
5. (a) Fukui, K. A. Formulation of the Reaction Coordinate. Formulation of the reaction coordinate. *J. Phys. Chem.* **1970**, *74*, 4161–4163. (b) Fukui, K. The Path of Chemical Reactions-The IRC Approach. *Acc. Chem. Res.* **1981**, *14*, 363–368.
6. Marenich, A. V.; Cramer, C. J.; Truhlar, D. G. *J. Phys. Chem. B* **2009**, *113*, 6378–6396.
7. (a) Zhao, Y.; Truhlar, D. G. *Theor. Chem. Acc.* **2008**, *120*, 215–241; (b) Zhao, Y.; Truhlar, D. G. *Acc. Chem. Res.* **2008**, *41*, 157–167.
8. Contreras-García, J.; Johnson, E. R.; Keinan, S.; Chaudret, R.; Piquemal, J.-P.; Beratan, D. N.; Yang, W. *J. Chem. Theory Comput.* **2011**, *7*, 625–632.
9. Legault, C. Y. *CYLVIEW*, 1.0b; Université de Sherbrooke: Canada, **2009**;  
<http://www.cylview.org>.

**5.6 Cartesian coordination and energies for the all the calculated species were performed at the B3LYP-D3/6-31G(d,p) level of theory in gas phase.**

## II

Sum of electronic and thermal Free Energies= -4858.932174

|   |             |             |             |
|---|-------------|-------------|-------------|
| C | -2.42288800 | -3.14924300 | -2.11543100 |
| C | -3.93502600 | -3.10764200 | -2.50770500 |
| C | -2.52078900 | -3.08326600 | -0.60383300 |
| C | -1.59963600 | -2.16861800 | -2.93147700 |
| H | -4.26349500 | -2.06617300 | -2.53552600 |
| H | -4.11548000 | -3.54638400 | -3.49179500 |
| C | -4.65581400 | -3.85390300 | -1.36242900 |
| C | -1.42178700 | -4.27485400 | -4.05516500 |
| C | -3.74996300 | -3.60698100 | -0.17707600 |
| C | -1.60403000 | -2.66758600 | 0.34928400  |
| C | -1.11581200 | -2.79522700 | -4.09039900 |
| C | -1.31486100 | -0.82520300 | -2.72815800 |
| H | -5.66881000 | -3.47741900 | -1.19090900 |
| H | -4.74634800 | -4.92683800 | -1.57274200 |
| H | -2.26202500 | -4.51577600 | -4.71833500 |
| H | -0.57491600 | -4.88555300 | -4.38179000 |
| C | -4.00015600 | -3.80722700 | 1.17645700  |
| C | -1.81187200 | -2.87026200 | 1.72264300  |

|   |             |             |             |
|---|-------------|-------------|-------------|
| O | -0.45197500 | -1.96009500 | -0.06095200 |
| C | -0.43928500 | -2.06592500 | -5.06236500 |
| C | -0.63821500 | -0.05800300 | -3.68710300 |
| O | -1.67043400 | -0.22214800 | -1.50463200 |
| H | -4.94656900 | -4.22328900 | 1.50810300  |
| C | -3.01810400 | -3.47411500 | 2.11052900  |
| P | -0.61781400 | -0.36624300 | -0.28394800 |
| H | -0.07469200 | -2.54901800 | -5.96351100 |
| C | -0.22956500 | -0.70175500 | -4.86644400 |
| H | -3.18790200 | -3.65398700 | 3.16651500  |
| O | -1.42997300 | 0.24538100  | 0.91609200  |
| O | 0.70912600  | 0.25744000  | -0.47547200 |
| H | 0.28386500  | -0.11607500 | -5.62114200 |
| H | -2.39076800 | 0.02509400  | 0.92816700  |
| C | -1.79080300 | -4.50360700 | -2.57517700 |
| H | -0.88204100 | -4.68387300 | -1.99190400 |
| H | -2.46606500 | -5.34735900 | -2.41599400 |
| C | -1.60485600 | 0.44904700  | 5.70921200  |
| C | -0.35536900 | -0.09894100 | 5.61741800  |
| C | -0.05970600 | -1.09589100 | 4.63906900  |
| C | -1.08204600 | -1.49233800 | 3.70007600  |
| C | -2.36482700 | -0.86958300 | 3.81405100  |
| C | -2.62217200 | 0.04464800  | 4.80035100  |
| C | 1.19838000  | -1.69895300 | 4.58278200  |
| C | -0.78240200 | -2.46598200 | 2.71853100  |
| C | 0.48992700  | -3.08274400 | 2.68609700  |
| C | 1.49367200  | -2.69147200 | 3.64655600  |
| C | 2.76162700  | -3.35220500 | 3.63669400  |
| H | 3.49791500  | -3.06136600 | 4.38105400  |
| C | 3.03316500  | -4.34492600 | 2.73578800  |
| C | 2.05245600  | -4.72562900 | 1.77726500  |
| C | 0.82550900  | -4.11941700 | 1.75721100  |
| H | 1.96031200  | -1.39798300 | 5.29647500  |
| H | -1.82506300 | 1.19079900  | 6.47036300  |
| H | 0.43622500  | 0.20606800  | 6.29485200  |
| H | -3.14580200 | -1.13791700 | 3.11402700  |
| H | -3.61477900 | 0.47632200  | 4.88658500  |
| H | 3.99302500  | -4.84878100 | 2.74145300  |
| H | 2.28713900  | -5.50388800 | 1.05931300  |
| H | 0.08102200  | -4.44203700 | 1.04008500  |
| C | 3.66202600  | 2.80228100  | -3.53582800 |
| C | 2.62861800  | 3.69649600  | -3.45480200 |
| C | 1.26739600  | 3.25389500  | -3.42562900 |
| C | 0.98891600  | 1.83781800  | -3.48574100 |

|   |             |             |             |
|---|-------------|-------------|-------------|
| C | 2.10345600  | 0.94094300  | -3.52489900 |
| C | 3.39129300  | 1.40553100  | -3.56272700 |
| C | 0.20724200  | 4.16116300  | -3.35553700 |
| C | -0.35244800 | 1.39042000  | -3.49730900 |
| C | -1.41696500 | 2.31893700  | -3.41539300 |
| C | -1.12384200 | 3.73139500  | -3.34557300 |
| C | -2.20402900 | 4.66508900  | -3.27997200 |
| H | -1.96689700 | 5.72382000  | -3.22988100 |
| C | -3.50508600 | 4.23960100  | -3.28655600 |
| C | -3.79916400 | 2.84833200  | -3.36120500 |
| C | -2.79134900 | 1.92315300  | -3.42957300 |
| H | 0.41979900  | 5.22705800  | -3.32793400 |
| H | 4.68911300  | 3.15093400  | -3.56913200 |
| H | 2.82085200  | 4.76563200  | -3.43213500 |
| H | 1.91693300  | -0.12424000 | -3.51771700 |
| H | 4.21566400  | 0.70201900  | -3.59401500 |
| H | -4.31654800 | 4.95839500  | -3.23745300 |
| H | -4.83127000 | 2.51536300  | -3.36072200 |
| H | -3.03991600 | 0.87261300  | -3.49271800 |
| C | 2.84903900  | 4.51388700  | 1.29008300  |
| C | 2.22788300  | 2.89883700  | -0.35897300 |
| C | 2.74767200  | 4.28569400  | -0.19104400 |
| H | 3.44681800  | 3.85167000  | 1.90500500  |
| H | 2.18706000  | 5.21184600  | 1.78532200  |
| H | 1.15529300  | 2.74303700  | -0.36773500 |
| H | 3.69812700  | 4.41519800  | -0.71708000 |
| H | 2.02607700  | 4.96951500  | -0.64046600 |
| N | 2.90008400  | 1.79431600  | -0.39794600 |
| H | 2.29860600  | 0.95246400  | -0.48877000 |
| C | 4.27855600  | 1.49409200  | -0.43412900 |
| C | 5.31566500  | 2.39649600  | -0.20635300 |
| C | 4.55628200  | 0.14638900  | -0.75314000 |
| C | 6.64294800  | 1.97331800  | -0.34582900 |
| H | 5.14996500  | 3.41621700  | 0.10405400  |
| C | 5.87753100  | -0.25034400 | -0.92482500 |
| C | 6.92234700  | 0.65248300  | -0.72410500 |
| H | 6.07988000  | -1.27400400 | -1.21572800 |
| H | 7.94277100  | 0.31761000  | -0.85746100 |
| O | 7.57881200  | 2.92309000  | -0.09771500 |
| C | 8.95242400  | 2.56354500  | -0.21654900 |
| H | 9.19626500  | 2.25353100  | -1.23929300 |
| H | 9.51691800  | 3.46106400  | 0.03354000  |
| H | 9.21576600  | 1.76069600  | 0.48181400  |
| O | 3.48885700  | -0.68428700 | -0.92765900 |

|   |             |             |             |
|---|-------------|-------------|-------------|
| C | 3.31556300  | -1.73436000 | 0.08419100  |
| H | 3.70212100  | -1.36590300 | 1.03526600  |
| H | 2.23449000  | -1.83928800 | 0.17159000  |
| C | 3.95733800  | -3.02696200 | -0.33351000 |
| C | 5.11929900  | -3.50796100 | 0.30304200  |
| C | 3.34836300  | -3.76289400 | -1.37180000 |
| C | 5.65399700  | -4.73344700 | -0.11206100 |
| C | 3.91348200  | -4.97933000 | -1.76179900 |
| C | 5.05855300  | -5.46588200 | -1.13506900 |
| H | 6.54524200  | -5.11518900 | 0.37724000  |
| H | 3.44809200  | -5.54982000 | -2.56035600 |
| H | 5.48672600  | -6.41447600 | -1.44380000 |
| C | 2.08668300  | -3.26858100 | -2.03874200 |
| H | 1.24426600  | -3.26493700 | -1.33881300 |
| H | 2.19446300  | -2.24250600 | -2.39983900 |
| H | 1.81906100  | -3.90329800 | -2.88660200 |
| C | 5.78772800  | -2.76606300 | 1.43960500  |
| H | 5.10353600  | -2.62323300 | 2.28096700  |
| H | 6.64826900  | -3.33028100 | 1.80664700  |
| H | 6.14491600  | -1.77678500 | 1.14045300  |
| C | -2.73917800 | 2.77855300  | 2.94314000  |
| C | -1.75544600 | 3.54043500  | 2.30396900  |
| C | -1.84189400 | 3.77060900  | 0.91746900  |
| C | -2.89120900 | 3.18929800  | 0.19413800  |
| C | -3.84323700 | 2.44085700  | 0.86601000  |
| C | -3.80631100 | 2.23159400  | 2.23699600  |
| H | -2.65499100 | 2.60439700  | 4.00789100  |
| H | -2.97306000 | 3.32420700  | -0.87666600 |
| H | -4.57130900 | 1.64238500  | 2.72701500  |
| C | -0.60407600 | 4.06077100  | 3.11324500  |
| C | -0.63104600 | 5.32314400  | 3.56627900  |
| H | -1.48351000 | 5.96514200  | 3.37369100  |
| H | 0.18443200  | 5.75405300  | 4.13743900  |
| C | 0.52917500  | 3.12656900  | 3.34364900  |
| C | 1.49479400  | 3.35369500  | 4.34065500  |
| C | 0.66865100  | 1.98614400  | 2.53707700  |
| C | 2.57414300  | 2.48856700  | 4.49657900  |
| H | 1.39281100  | 4.20007500  | 5.01129600  |
| C | 1.74531600  | 1.11624600  | 2.69711800  |
| H | -0.08096000 | 1.76369800  | 1.79304600  |
| C | 2.70950400  | 1.36771800  | 3.67031800  |
| H | 3.30600400  | 2.68127400  | 5.27512100  |
| H | 1.80950000  | 0.23418400  | 2.06950500  |
| H | 3.54404200  | 0.68651600  | 3.80478700  |

|   |             |             |             |
|---|-------------|-------------|-------------|
| C | -0.84101800 | 4.63741900  | 0.19940500  |
| H | -1.21528900 | 5.66328200  | 0.10346500  |
| H | 0.09585500  | 4.69256100  | 0.75317700  |
| H | -0.65238700 | 4.26919900  | -0.81040500 |
| O | -4.91918500 | 1.90498700  | 0.09675600  |
| S | -4.93951900 | 0.30924400  | -0.21683900 |
| O | -4.96515100 | 0.08687600  | -1.64978600 |
| O | -3.99962400 | -0.39696800 | 0.66049400  |
| C | -6.63085900 | -0.08760000 | 0.46773600  |
| F | -6.82819300 | -1.39389900 | 0.30617700  |
| F | -7.55058300 | 0.60320500  | -0.18754200 |
| F | -6.65565900 | 0.21846800  | 1.76187500  |

### RR-TS1

Sum of electronic and thermal Free Energies=-4858.917167

|   |             |             |             |
|---|-------------|-------------|-------------|
| C | 2.64579700  | -1.24078500 | 3.49112400  |
| C | 4.09843100  | -0.74474500 | 3.76929300  |
| C | 2.82986900  | -1.87358700 | 2.12338000  |
| C | 1.59205100  | -0.18761300 | 3.78741600  |
| H | 4.24641100  | 0.21120300  | 3.25697400  |
| H | 4.28883500  | -0.59270200 | 4.83432200  |
| C | 5.00137000  | -1.82406000 | 3.12798400  |
| C | 1.70051100  | -1.56605600 | 5.74131100  |
| C | 4.14387800  | -2.34919200 | 1.99749600  |
| C | 1.92793000  | -2.11009700 | 1.09710700  |
| C | 1.10664900  | -0.33722200 | 5.09529200  |
| C | 1.10365100  | 0.85033200  | 3.00381900  |
| H | 5.94930200  | -1.41352200 | 2.76722400  |
| H | 5.24858700  | -2.61901500 | 3.84216600  |
| H | 2.50776200  | -1.28915000 | 6.43129800  |
| H | 0.96810200  | -2.13551000 | 6.32063400  |
| C | 4.50063600  | -3.15631000 | 0.92318500  |
| C | 2.24183400  | -2.94684600 | 0.01420700  |
| O | 0.68513100  | -1.44018900 | 1.09791800  |
| C | 0.18813700  | 0.56539400  | 5.62036600  |
| C | 0.18242400  | 1.78254000  | 3.50194400  |
| O | 1.52828300  | 0.93935800  | 1.66343100  |
| H | 5.51247900  | -3.53633800 | 0.82809600  |
| C | 3.53909200  | -3.48068900 | -0.03535700 |
| P | 0.69842500  | 0.09032100  | 0.56198200  |
| H | -0.18531400 | 0.44974600  | 6.63304000  |
| C | -0.25215800 | 1.62380700  | 4.82810200  |
| H | 3.79190900  | -4.14032600 | -0.85852000 |
| O | 1.65988200  | 0.16230100  | -0.68431000 |

|   |             |             |             |
|---|-------------|-------------|-------------|
| O | -0.67858500 | 0.55563800  | 0.29579300  |
| H | -0.96220200 | 2.34213600  | 5.22356000  |
| H | 2.62707600  | 0.12821000  | -0.50575300 |
| C | 2.24342900  | -2.34402600 | 4.52817300  |
| H | 1.44238700  | -2.95168000 | 4.09419400  |
| H | 3.07587000  | -3.00914500 | 4.76738300  |
| C | 1.80737000  | -2.40861800 | -5.13143900 |
| C | 0.71494500  | -3.13354100 | -4.74336200 |
| C | 0.50097300  | -3.46187100 | -3.37058300 |
| C | 1.43984400  | -2.99718700 | -2.37580500 |
| C | 2.55549500  | -2.22425300 | -2.82553600 |
| C | 2.73919000  | -1.95737200 | -4.15630800 |
| C | -0.60153400 | -4.22174700 | -2.97413100 |
| C | 1.23097000  | -3.32031100 | -1.01474200 |
| C | 0.10647500  | -4.08810100 | -0.62769900 |
| C | -0.82196200 | -4.54685200 | -1.63418300 |
| C | -1.93809900 | -5.34877900 | -1.24035700 |
| H | -2.61077800 | -5.70480800 | -2.01559400 |
| C | -2.14664400 | -5.67561600 | 0.07100900  |
| C | -1.23647000 | -5.22509300 | 1.06785500  |
| C | -0.14540300 | -4.47063700 | 0.72916200  |
| H | -1.29998400 | -4.57506500 | -3.72816700 |
| H | 1.96946100  | -2.17662300 | -6.17904700 |
| H | -0.00876700 | -3.48204300 | -5.47404300 |
| H | 3.26421700  | -1.85741200 | -2.09630600 |
| H | 3.61192200  | -1.40056100 | -4.47838200 |
| H | -3.00141100 | -6.27581600 | 0.36181400  |
| H | -1.41375800 | -5.48753000 | 2.10519100  |
| H | 0.55225700  | -4.16465800 | 1.49835900  |
| C | -4.46143100 | 3.12390800  | 1.68937500  |
| C | -3.65200200 | 4.19869200  | 1.43844100  |
| C | -2.25602600 | 4.16329500  | 1.75273800  |
| C | -1.70796200 | 2.97617200  | 2.36459200  |
| C | -2.58960000 | 1.87415700  | 2.59527000  |
| C | -3.91681500 | 1.94125000  | 2.26717300  |
| C | -1.42116400 | 5.25710700  | 1.50810400  |
| C | -0.34015200 | 2.93695900  | 2.71461500  |
| C | 0.49794200  | 4.04092900  | 2.44199400  |
| C | -0.06218400 | 5.22630600  | 1.83519600  |
| C | 0.78671400  | 6.34900400  | 1.59018100  |
| H | 0.35011100  | 7.23647900  | 1.14126600  |
| C | 2.11630000  | 6.31124000  | 1.91169700  |
| C | 2.67373700  | 5.14201800  | 2.50370100  |
| C | 1.89051900  | 4.04845400  | 2.76576200  |

|   |             |             |             |
|---|-------------|-------------|-------------|
| H | -1.84125700 | 6.15973500  | 1.07180000  |
| H | -5.51801100 | 3.16386500  | 1.44630300  |
| H | -4.05813000 | 5.11158500  | 1.01081100  |
| H | -2.18584500 | 0.97228600  | 3.03356500  |
| H | -4.55975800 | 1.08540500  | 2.44250800  |
| H | 2.75076300  | 7.17074900  | 1.72158600  |
| H | 3.72810400  | 5.12550900  | 2.76080300  |
| H | 2.32328800  | 3.17250300  | 3.23318900  |
| C | -1.93825700 | 4.86478000  | -2.13771600 |
| C | -2.33769300 | 2.58688200  | -1.21909900 |
| C | -2.93171000 | 3.77149800  | -1.89805300 |
| H | -1.28067900 | 5.12869000  | -1.31913000 |
| H | -2.25387800 | 5.68317100  | -2.77529800 |
| H | -1.28354000 | 2.59258900  | -0.97423400 |
| H | -3.39805900 | 3.44103900  | -2.83401300 |
| H | -3.76074600 | 4.12801200  | -1.26251000 |
| N | -2.92888700 | 1.49929600  | -0.85263100 |
| H | -2.29222200 | 0.82627900  | -0.38556400 |
| C | -4.26316100 | 1.05332800  | -0.92154500 |
| C | -5.32381700 | 1.77132600  | -1.46768000 |
| C | -4.47599000 | -0.21541000 | -0.33329200 |
| C | -6.61729400 | 1.23989700  | -1.42595100 |
| H | -5.19699800 | 2.73643300  | -1.92983200 |
| C | -5.77271400 | -0.71301400 | -0.26399500 |
| C | -6.83973100 | 0.00132600  | -0.81280000 |
| H | -5.95439000 | -1.64686000 | 0.24868200  |
| H | -7.83719300 | -0.41307600 | -0.74401900 |
| O | -7.57898100 | 2.01316100  | -1.99459900 |
| C | -8.92164500 | 1.53999600  | -1.96798500 |
| H | -9.28258200 | 1.42023400  | -0.93964200 |
| H | -9.51580700 | 2.30077000  | -2.47316900 |
| H | -9.01988400 | 0.58754200  | -2.50215400 |
| O | -3.37068200 | -0.81786300 | 0.17250000  |
| C | -3.20721300 | -2.25820000 | 0.04635500  |
| H | -3.57647900 | -2.56126900 | -0.93375600 |
| H | -2.12402300 | -2.38881900 | 0.06161100  |
| C | -3.85385400 | -3.02930600 | 1.16876300  |
| C | -4.88954200 | -3.95205700 | 0.91342100  |
| C | -3.36724700 | -2.84253100 | 2.48015500  |
| C | -5.44758800 | -4.65371200 | 1.98866600  |
| C | -3.95393900 | -3.55732200 | 3.52770800  |
| C | -4.99073600 | -4.45539600 | 3.28802700  |
| H | -6.24559500 | -5.36536100 | 1.79881500  |
| H | -3.58560900 | -3.41141400 | 4.53907600  |

|   |             |             |             |
|---|-------------|-------------|-------------|
| H | -5.43726200 | -5.00489200 | 4.11087100  |
| C | -2.19211900 | -1.93710200 | 2.75783900  |
| H | -2.07462300 | -1.76303000 | 3.83055700  |
| H | -1.26407300 | -2.38553200 | 2.38770300  |
| H | -2.28712800 | -0.97537500 | 2.25391600  |
| C | -5.38539000 | -4.25187200 | -0.48451900 |
| H | -5.76774100 | -3.36725900 | -1.00295900 |
| H | -4.58607900 | -4.66434500 | -1.10726100 |
| H | -6.19242900 | -4.98703800 | -0.45202700 |
| C | 2.27767600  | 1.59592200  | -3.69797800 |
| C | 1.46695600  | 2.48600100  | -2.97350300 |
| C | 2.00440300  | 3.11672500  | -1.82685300 |
| C | 3.31429500  | 2.81983200  | -1.43813100 |
| C | 4.07167600  | 1.92457300  | -2.17267400 |
| C | 3.58367400  | 1.30880200  | -3.31327400 |
| H | 1.86656200  | 1.10220200  | -4.57130800 |
| H | 3.73152400  | 3.27036500  | -0.54413500 |
| H | 4.20491200  | 0.62347100  | -3.87329300 |
| C | 0.07395700  | 2.70664600  | -3.47271000 |
| C | -0.36398000 | 3.96956700  | -3.76772300 |
| H | 0.31591800  | 4.81096300  | -3.71409600 |
| H | -1.25789200 | 4.12723800  | -4.35440600 |
| C | -0.81466700 | 1.52915100  | -3.62360700 |
| C | -2.03004200 | 1.59777800  | -4.34050500 |
| C | -0.52625400 | 0.32767000  | -2.95060200 |
| C | -2.93935200 | 0.54651200  | -4.31827300 |
| H | -2.26707800 | 2.47924700  | -4.92603900 |
| C | -1.44354900 | -0.71956500 | -2.91743800 |
| H | 0.40505800  | 0.22598200  | -2.41641300 |
| C | -2.66032500 | -0.61304700 | -3.58765300 |
| H | -3.86855200 | 0.63006600  | -4.87325800 |
| H | -1.20296700 | -1.61635200 | -2.36061500 |
| H | -3.37912200 | -1.42589500 | -3.55658700 |
| C | 1.22554400  | 4.04691100  | -0.93997100 |
| H | 1.85420800  | 4.41055600  | -0.12926100 |
| H | 0.83901200  | 4.91272200  | -1.47679200 |
| H | 0.37772400  | 3.53709900  | -0.47684300 |
| O | 5.39504600  | 1.64176900  | -1.73773900 |
| S | 5.58726800  | 0.48801000  | -0.59955200 |
| O | 6.51177000  | 0.96002100  | 0.40895800  |
| O | 4.29006200  | -0.08266900 | -0.23041800 |
| C | 6.46495600  | -0.79413300 | -1.64117400 |
| F | 6.75710600  | -1.83308900 | -0.86717000 |
| F | 7.56974900  | -0.26726400 | -2.14399300 |



|   |            |             |             |
|---|------------|-------------|-------------|
| F | 5.65280400 | -1.17995700 | -2.62843500 |
|---|------------|-------------|-------------|

**RR-III**

|                                              |  |  |              |
|----------------------------------------------|--|--|--------------|
| Sum of electronic and thermal Free Energies= |  |  | -4858.967942 |
|----------------------------------------------|--|--|--------------|

|   |             |             |             |
|---|-------------|-------------|-------------|
| C | 2.99730000  | -0.70879000 | 3.49986300  |
| C | 4.45732500  | -0.16107200 | 3.54309800  |
| C | 3.05901900  | -1.55292700 | 2.23851900  |
| C | 1.95347000  | 0.36902900  | 3.73955000  |
| H | 4.53145600  | 0.69711300  | 2.86760500  |
| H | 4.74814600  | 0.16768300  | 4.54358400  |
| C | 5.31767500  | -1.32562800 | 3.00085400  |
| C | 2.30877400  | -0.68025800 | 5.86272000  |
| C | 4.36466400  | -2.03673800 | 2.06558500  |
| C | 2.06828900  | -1.95469700 | 1.35366800  |
| C | 1.61793900  | 0.42529900  | 5.10119100  |
| C | 1.35620200  | 1.26592400  | 2.86191500  |
| H | 6.21368400  | -0.97362300 | 2.48079900  |
| H | 5.65479500  | -1.98820300 | 3.80727200  |
| H | 3.17890300  | -0.29108500 | 6.40662300  |
| H | 1.65760900  | -1.15506400 | 6.60218700  |
| C | 4.63374900  | -3.01156400 | 1.11185600  |
| C | 2.29913100  | -2.94812600 | 0.38795100  |
| O | 0.81497200  | -1.30528500 | 1.37760300  |
| C | 0.73851400  | 1.39031500  | 5.57876600  |
| C | 0.46896200  | 2.25544300  | 3.31042700  |
| O | 1.63466100  | 1.14848800  | 1.48513400  |
| H | 5.63810400  | -3.40276200 | 0.98725200  |
| C | 3.59467100  | -3.48504100 | 0.31067100  |
| P | 0.71876000  | 0.12575800  | 0.62394200  |
| H | 0.48041500  | 1.43194000  | 6.63230600  |
| C | 0.18469300  | 2.30399700  | 4.68475700  |
| H | 3.78277500  | -4.26606000 | -0.41805000 |
| O | 1.52455800  | 0.02981800  | -0.72667500 |
| O | -0.69448100 | 0.52332300  | 0.45912800  |
| H | -0.49832500 | 3.06863100  | 5.03904600  |
| H | 2.50571000  | 0.00038600  | -0.66065200 |
| C | 2.73579900  | -1.63685800 | 4.73461100  |
| H | 1.90822000  | -2.31149400 | 4.49188200  |
| H | 3.60523100  | -2.24962800 | 4.98151900  |
| C | 1.58434800  | -3.21211700 | -4.74333000 |
| C | 0.52571700  | -3.87717400 | -4.19026300 |
| C | 0.38685300  | -3.98915800 | -2.77336000 |

|   |             |             |             |
|---|-------------|-------------|-------------|
| C | 1.36336100  | -3.36335700 | -1.91182600 |
| C | 2.44272700  | -2.66200900 | -2.53571600 |
| C | 2.55642800  | -2.60719900 | -3.89970800 |
| C | -0.67272900 | -4.70160000 | -2.20823900 |
| C | 1.22814700  | -3.47256900 | -0.50700200 |
| C | 0.13548900  | -4.17926200 | 0.05045700  |
| C | -0.82077800 | -4.81633600 | -0.82482100 |
| C | -1.89958900 | -5.56244300 | -0.25744700 |
| H | -2.58645800 | -6.06165000 | -0.93469400 |
| C | -2.06307400 | -5.65128600 | 1.09713300  |
| C | -1.13053000 | -5.01722900 | 1.96502000  |
| C | -0.06227300 | -4.32395700 | 1.46095500  |
| H | -1.39344300 | -5.18672700 | -2.86144800 |
| H | 1.69033200  | -3.14611400 | -5.82123600 |
| H | -0.22649100 | -4.34453600 | -4.81873500 |
| H | 3.18390200  | -2.18243400 | -1.91218700 |
| H | 3.40680800  | -2.10674200 | -4.34975900 |
| H | -2.89869500 | -6.19921500 | 1.51803800  |
| H | -1.26902200 | -5.09240700 | 3.03825800  |
| H | 0.65295300  | -3.87700600 | 2.13960700  |
| C | -4.35332900 | 3.16597500  | 1.69964200  |
| C | -3.61943000 | 4.23539000  | 1.26374500  |
| C | -2.20457700 | 4.29748800  | 1.47377000  |
| C | -1.55676400 | 3.21871700  | 2.18211100  |
| C | -2.36325900 | 2.11889200  | 2.61150600  |
| C | -3.71112300 | 2.08665000  | 2.37213900  |
| C | -1.44250500 | 5.38279000  | 1.03159200  |
| C | -0.16717000 | 3.27629300  | 2.42618800  |
| C | 0.59287400  | 4.37422700  | 1.96693400  |
| C | -0.06486900 | 5.45038400  | 1.26225200  |
| C | 0.70856600  | 6.57110600  | 0.82967200  |
| H | 0.20071600  | 7.37688400  | 0.30755100  |
| C | 2.05382400  | 6.63522500  | 1.07226100  |
| C | 2.70630600  | 5.57430700  | 1.76305400  |
| C | 1.99978500  | 4.48350800  | 2.19757900  |
| H | -1.93491300 | 6.20579800  | 0.51947700  |
| H | -5.42439200 | 3.13086400  | 1.53145400  |
| H | -4.10168900 | 5.07061800  | 0.76253200  |
| H | -1.88286600 | 1.29621600  | 3.12289800  |
| H | -4.29719000 | 1.23223800  | 2.69500700  |
| H | 2.62920500  | 7.49443700  | 0.74336600  |
| H | 3.77268900  | 5.63905300  | 1.95437800  |
| H | 2.50361600  | 3.68908500  | 2.73479400  |
| C | -1.75354400 | 4.38909400  | -2.75574800 |

|   |             |             |             |
|---|-------------|-------------|-------------|
| C | -2.30199400 | 2.49430400  | -1.19357600 |
| C | -2.84807500 | 3.53306600  | -2.10617400 |
| H | -1.16737100 | 4.84015900  | -1.95311300 |
| H | -2.24025900 | 5.21853100  | -3.27825100 |
| H | -1.27922900 | 2.56952100  | -0.84551500 |
| H | -3.49636400 | 3.05727000  | -2.84659000 |
| H | -3.48825100 | 4.19262400  | -1.50618600 |
| N | -2.90414200 | 1.44326200  | -0.74115500 |
| H | -2.27975200 | 0.82550100  | -0.19144600 |
| C | -4.22428300 | 0.97131200  | -0.88441800 |
| C | -5.29481000 | 1.75573800  | -1.30400300 |
| C | -4.42181400 | -0.37350600 | -0.48991300 |
| C | -6.57921000 | 1.20743500  | -1.37067100 |
| H | -5.18070900 | 2.79838500  | -1.55328200 |
| C | -5.70901300 | -0.89828100 | -0.53935400 |
| C | -6.78092300 | -0.12151500 | -0.98560000 |
| H | -5.89197500 | -1.90368200 | -0.19463500 |
| H | -7.76905200 | -0.56261100 | -1.00788600 |
| O | -7.55223100 | 2.05555200  | -1.80064400 |
| C | -8.88664300 | 1.56467900  | -1.85751300 |
| H | -9.24207100 | 1.25667300  | -0.86688000 |
| H | -9.49498900 | 2.39366500  | -2.21803100 |
| H | -8.97331500 | 0.72136700  | -2.55314400 |
| O | -3.30545400 | -1.01572200 | -0.07899900 |
| C | -3.28383600 | -2.45190200 | 0.08927700  |
| H | -3.68413700 | -2.90855500 | -0.81770000 |
| H | -2.21686100 | -2.67102600 | 0.13642000  |
| C | -3.98254000 | -2.94563100 | 1.33333100  |
| C | -5.00810700 | -3.91018500 | 1.24859800  |
| C | -3.54136000 | -2.48178300 | 2.59128000  |
| C | -5.61408800 | -4.35948800 | 2.42782200  |
| C | -4.17432700 | -2.95129600 | 3.74535200  |
| C | -5.21014300 | -3.87831700 | 3.66874300  |
| H | -6.40615100 | -5.09981400 | 2.36617600  |
| H | -3.83931000 | -2.59166300 | 4.71396000  |
| H | -5.69218200 | -4.23440600 | 4.57384100  |
| C | -2.36921600 | -1.54116800 | 2.71597300  |
| H | -1.45259800 | -2.00628700 | 2.33913800  |
| H | -2.50613200 | -0.63003800 | 2.13549600  |
| H | -2.20004300 | -1.27232800 | 3.76207100  |
| C | -5.43934600 | -4.53008400 | -0.06308400 |
| H | -4.61429400 | -5.07290400 | -0.53375100 |
| H | -6.25133200 | -5.24132800 | 0.10191200  |
| H | -5.79308000 | -3.79836900 | -0.79708600 |

|   |             |             |             |
|---|-------------|-------------|-------------|
| C | 1.84812400  | 1.08326800  | -3.77833300 |
| C | 1.15177800  | 2.12499800  | -3.12301400 |
| C | 1.87898500  | 2.93945100  | -2.20875100 |
| C | 3.21847500  | 2.64682500  | -1.94764100 |
| C | 3.84474500  | 1.59528300  | -2.59439300 |
| C | 3.18677500  | 0.81200500  | -3.52914500 |
| H | 1.31662500  | 0.46837400  | -4.49434800 |
| H | 3.76940200  | 3.22707000  | -1.21547700 |
| H | 3.70520500  | 0.00859000  | -4.03333400 |
| C | -0.27626300 | 2.30635700  | -3.42844700 |
| C | -0.80948100 | 3.68232900  | -3.76866500 |
| H | 0.02973700  | 4.35569000  | -3.95886400 |
| H | -1.33896800 | 3.61096000  | -4.72581900 |
| C | -1.13664500 | 1.14924400  | -3.57723400 |
| C | -2.36891100 | 1.20756900  | -4.28421700 |
| C | -0.82934200 | -0.07994300 | -2.93112500 |
| C | -3.24485200 | 0.13029100  | -4.30561100 |
| H | -2.63668800 | 2.10192100  | -4.83398600 |
| C | -1.71343600 | -1.14788900 | -2.95067900 |
| H | 0.08950800  | -0.16959000 | -2.37143600 |
| C | -2.93142900 | -1.05271300 | -3.63003700 |
| H | -4.17727600 | 0.21197700  | -4.85542600 |
| H | -1.45239300 | -2.05800900 | -2.42442800 |
| H | -3.62576700 | -1.88677400 | -3.63605200 |
| C | 1.27132600  | 4.06501800  | -1.42193400 |
| H | 1.96933300  | 4.42087400  | -0.66608600 |
| H | 1.00902000  | 4.92065900  | -2.04971400 |
| H | 0.36960100  | 3.75196100  | -0.89644000 |
| O | 5.19889900  | 1.31560200  | -2.27114700 |
| S | 5.45972100  | 0.32757800  | -0.99445700 |
| O | 6.37891400  | 0.95185800  | -0.06528500 |
| O | 4.19073000  | -0.24071600 | -0.53563000 |
| C | 6.36635300  | -1.03479700 | -1.89999300 |
| F | 6.72744400  | -1.95626100 | -1.01423600 |
| F | 7.43131600  | -0.52814000 | -2.49994900 |
| F | 5.54331400  | -1.57164400 | -2.80256700 |

## RR-TS2

*B3LYP-D3/6-31G(d,p):*

Sum of electronic and thermal Free Energies=-4858.947998

*SMD//M062X/6-31+G(d,p):*

Sum of electronic and thermal Free Energies= -4856.912969

|   |            |             |            |
|---|------------|-------------|------------|
| C | 3.86073200 | -0.45431500 | 2.89963800 |
|---|------------|-------------|------------|

|   |             |             |             |
|---|-------------|-------------|-------------|
| C | 5.25079000  | 0.10817800  | 2.47346800  |
| C | 3.56874300  | -1.37844100 | 1.73115800  |
| C | 2.89188100  | 0.61526700  | 3.37496800  |
| H | 5.09537100  | 0.92333100  | 1.75971900  |
| H | 5.81766700  | 0.50102000  | 3.32090100  |
| C | 5.94283300  | -1.08139900 | 1.76604600  |
| C | 3.87269600  | -0.30149700 | 5.35803300  |
| C | 4.77560500  | -1.86585400 | 1.20723100  |
| C | 2.37031000  | -1.84675200 | 1.21325200  |
| C | 2.94366000  | 0.73406300  | 4.77232800  |
| C | 2.04191500  | 1.44910700  | 2.65729000  |
| H | 6.62944800  | -0.75541700 | 0.97884300  |
| H | 6.52789600  | -1.68447600 | 2.47091700  |
| H | 4.84302500  | 0.14664400  | 5.60759000  |
| H | 3.48298500  | -0.74971200 | 6.27639200  |
| C | 4.77271700  | -2.89821200 | 0.27674900  |
| C | 2.32868400  | -2.91973600 | 0.30926700  |
| O | 1.16749400  | -1.17940700 | 1.53221600  |
| C | 2.18242500  | 1.68968300  | 5.43495800  |
| C | 1.26568800  | 2.43011200  | 3.29454900  |
| O | 1.95685000  | 1.27199700  | 1.25833200  |
| H | 5.70354400  | -3.28286600 | -0.12697400 |
| C | 3.55386900  | -3.44258500 | -0.13285600 |
| P | 0.88326100  | 0.18862500  | 0.70388600  |
| H | 2.22040500  | 1.77655700  | 6.51627900  |
| C | 1.36143300  | 2.53426500  | 4.69127200  |
| H | 3.53478600  | -4.27715900 | -0.82575700 |
| O | 1.35126900  | -0.04049700 | -0.78350800 |
| O | -0.53071400 | 0.59478700  | 0.82215500  |
| H | 0.76628400  | 3.29349300  | 5.18747600  |
| H | 2.32062600  | -0.04630000 | -0.94406500 |
| C | 4.00313500  | -1.31149000 | 4.20442100  |
| H | 3.17094400  | -2.02197200 | 4.24418400  |
| H | 4.93268000  | -1.88428800 | 4.22182500  |
| C | -0.24196000 | -3.51771500 | -4.16072600 |
| C | -0.89731500 | -4.30041100 | -3.24943500 |
| C | -0.48689100 | -4.33813000 | -1.88125800 |
| C | 0.64209400  | -3.54085400 | -1.46172300 |
| C | 1.30287300  | -2.74813000 | -2.45110200 |
| C | 0.87343700  | -2.73467000 | -3.75131700 |
| C | -1.15129700 | -5.13164700 | -0.94353800 |
| C | 1.05454100  | -3.57272200 | -0.11039700 |
| C | 0.33056700  | -4.33240100 | 0.84101700  |
| C | -0.79338700 | -5.12954600 | 0.40692800  |

|   |             |             |             |
|---|-------------|-------------|-------------|
| C | -1.52049700 | -5.89647000 | 1.36763400  |
| H | -2.36781200 | -6.48108100 | 1.02476000  |
| C | -1.17877400 | -5.87373900 | 2.69049200  |
| C | -0.06244600 | -5.10433300 | 3.12154500  |
| C | 0.67454600  | -4.37228900 | 2.22911500  |
| H | -1.96620600 | -5.76961200 | -1.27363100 |
| H | -0.56511700 | -3.49339800 | -5.19632600 |
| H | -1.74431500 | -4.91098800 | -3.54977600 |
| H | 2.15067400  | -2.14939000 | -2.15204600 |
| H | 1.39256600  | -2.12753400 | -4.48442700 |
| H | -1.75482900 | -6.43894900 | 3.41464300  |
| H | 0.21104400  | -5.10559100 | 4.17188100  |
| H | 1.53317800  | -3.81011500 | 2.57416600  |
| C | -3.83196600 | 2.97057800  | 2.52112100  |
| C | -3.26196800 | 4.09749900  | 1.99528000  |
| C | -1.84282200 | 4.27383700  | 1.99330300  |
| C | -1.00917100 | 3.24732300  | 2.57476500  |
| C | -1.65042800 | 2.09130500  | 3.12027200  |
| C | -3.01193100 | 1.95332000  | 3.08795900  |
| C | -1.24726200 | 5.41267600  | 1.44371700  |
| C | 0.39269000  | 3.41149800  | 2.58255100  |
| C | 0.98164600  | 4.57054000  | 2.03119800  |
| C | 0.13977900  | 5.58746200  | 1.44566200  |
| C | 0.74859300  | 6.74294900  | 0.86741500  |
| H | 0.10437000  | 7.50184400  | 0.43246300  |
| C | 2.10876700  | 6.89445600  | 0.86043000  |
| C | 2.94129900  | 5.89692500  | 1.44351200  |
| C | 2.39641300  | 4.77667400  | 2.01372800  |
| H | -1.87810100 | 6.18690200  | 1.01363800  |
| H | -4.90983200 | 2.84605300  | 2.50960200  |
| H | -3.87972000 | 4.88890800  | 1.57960500  |
| H | -1.03414500 | 1.31007400  | 3.54586500  |
| H | -3.47398400 | 1.06041700  | 3.49618000  |
| H | 2.55918800  | 7.77712700  | 0.41817300  |
| H | 4.01806500  | 6.03334800  | 1.44065300  |
| H | 3.03803400  | 4.02674400  | 2.46081800  |
| C | -2.27647800 | 4.74665300  | -2.54837400 |
| C | -2.19685000 | 2.78539800  | -1.08456300 |
| C | -3.10186300 | 3.86055900  | -1.62670400 |
| H | -1.59004700 | 5.36097600  | -1.95774200 |
| H | -2.91404200 | 5.43687300  | -3.10659100 |
| H | -1.31614800 | 3.13499200  | -0.56541300 |
| H | -3.90806700 | 3.40766600  | -2.20492700 |
| H | -3.55118200 | 4.42539000  | -0.80310600 |

|   |             |             |             |
|---|-------------|-------------|-------------|
| N | -2.68389600 | 1.66142200  | -0.46810200 |
| H | -1.95135300 | 1.09500400  | -0.00768500 |
| C | -3.94141500 | 1.10794200  | -0.44513000 |
| C | -5.13706500 | 1.81533700  | -0.65983100 |
| C | -4.01974300 | -0.28705100 | -0.09712800 |
| C | -6.36722800 | 1.17498400  | -0.60725900 |
| H | -5.14436500 | 2.87822300  | -0.82345000 |
| C | -5.26646500 | -0.90746400 | -0.03198200 |
| C | -6.43186700 | -0.19844800 | -0.29718600 |
| H | -5.33068700 | -1.94088500 | 0.26687800  |
| H | -7.38339800 | -0.71005800 | -0.23249000 |
| O | -7.44941000 | 1.95960300  | -0.83944200 |
| C | -8.74577700 | 1.37696600  | -0.74192300 |
| H | -8.88141200 | 0.57749700  | -1.47956000 |
| H | -8.93279300 | 0.98322900  | 0.26382200  |
| H | -9.44904600 | 2.18239100  | -0.95080100 |
| O | -2.84315200 | -0.87696400 | 0.13941100  |
| C | -2.69057300 | -2.32008700 | 0.17546200  |
| H | -3.05258500 | -2.71026400 | -0.77501000 |
| H | -1.60667500 | -2.43373700 | 0.20276800  |
| C | -3.33385500 | -3.01824800 | 1.34899500  |
| C | -4.28048400 | -4.04278300 | 1.13179000  |
| C | -2.92715800 | -2.68898400 | 2.65806200  |
| C | -4.83435200 | -4.69900000 | 2.23631600  |
| C | -3.50709700 | -3.36492500 | 3.73548000  |
| C | -4.45784000 | -4.36014400 | 3.53170700  |
| H | -5.56496900 | -5.48556700 | 2.07260500  |
| H | -3.19670000 | -3.11010300 | 4.74447300  |
| H | -4.89831600 | -4.87617300 | 4.37919900  |
| C | -1.84955500 | -1.66786600 | 2.91480500  |
| H | -2.02983800 | -0.72585700 | 2.39762800  |
| H | -1.75562300 | -1.47081900 | 3.98598100  |
| H | -0.88074600 | -2.03336000 | 2.56134000  |
| C | -4.70234100 | -4.48333100 | -0.25356600 |
| H | -5.43236900 | -5.29282600 | -0.18838500 |
| H | -5.15972800 | -3.67825200 | -0.83941000 |
| H | -3.85299900 | -4.84942600 | -0.83638900 |
| C | 0.62953200  | 1.07487100  | -3.81274500 |
| C | 0.18557700  | 2.03804900  | -2.88352600 |
| C | 1.17245000  | 2.74430100  | -2.14498600 |
| C | 2.52125400  | 2.42966500  | -2.32753900 |
| C | 2.90169300  | 1.44983100  | -3.22748000 |
| C | 1.97369900  | 0.76590900  | -3.99251900 |
| H | -0.09608800 | 0.55831700  | -4.42565100 |

|   |             |             |             |
|---|-------------|-------------|-------------|
| H | 3.27868500  | 2.94964600  | -1.75171800 |
| H | 2.29243300  | 0.02786000  | -4.71728000 |
| C | -1.28549100 | 2.39755300  | -2.90190500 |
| C | -1.49041100 | 3.81122800  | -3.49362900 |
| H | -0.51718400 | 4.24326600  | -3.72946600 |
| H | -2.01114800 | 3.71611400  | -4.44981200 |
| C | -2.20547600 | 1.30763300  | -3.33082000 |
| C | -3.37271000 | 1.54610700  | -4.07761400 |
| C | -1.97362500 | -0.01362300 | -2.88686800 |
| C | -4.25390100 | 0.51150400  | -4.39099100 |
| H | -3.60146400 | 2.54332800  | -4.43418200 |
| C | -2.83833200 | -1.04758300 | -3.22301200 |
| H | -1.10745100 | -0.22795400 | -2.27096600 |
| C | -3.98771600 | -0.79094400 | -3.97430600 |
| H | -5.14387700 | 0.72770200  | -4.97319500 |
| H | -2.60460400 | -2.05693300 | -2.90381300 |
| H | -4.66646400 | -1.59779000 | -4.23133500 |
| C | 0.87739900  | 3.78919900  | -1.10886500 |
| H | 0.11117400  | 4.49752900  | -1.41447200 |
| H | 0.55625900  | 3.32046300  | -0.17641200 |
| H | 1.77376000  | 4.36168800  | -0.86884300 |
| O | 4.28260000  | 1.17043900  | -3.38765300 |
| S | 4.98366100  | 0.19025400  | -2.28296200 |
| O | 6.28682500  | 0.71777800  | -1.94270200 |
| O | 4.01248500  | -0.16356000 | -1.24650300 |
| C | 5.22958200  | -1.32240600 | -3.35772300 |
| F | 5.98610800  | -0.99965700 | -4.39443400 |
| F | 4.03727900  | -1.75076700 | -3.77846300 |
| F | 5.81612000  | -2.26508900 | -2.63031700 |

#### RR-IV

Sum of electronic and thermal Free Energies=-4858.960020

|   |            |             |             |
|---|------------|-------------|-------------|
| C | 4.13638800 | -2.24864900 | -1.75135900 |
| C | 5.15133700 | -2.73963400 | -0.67281800 |
| C | 4.03512800 | -0.77611800 | -1.38179000 |
| C | 2.93941400 | -3.17458500 | -1.88950300 |
| H | 4.61422600 | -2.90939300 | 0.26582800  |
| H | 5.64087000 | -3.67387600 | -0.95745300 |
| C | 6.12705400 | -1.55525600 | -0.50438100 |
| C | 4.50082800 | -3.85964200 | -3.57154800 |
| C | 5.25049200 | -0.36237800 | -0.81254100 |
| C | 3.03328300 | 0.16432000  | -1.59028800 |
| C | 3.18989100 | -4.14120600 | -2.87697900 |
| C | 1.72874500 | -3.20611200 | -1.20936300 |



|   |             |             |             |
|---|-------------|-------------|-------------|
| H | 6.54806400  | -1.50121100 | 0.50284700  |
| H | 6.96784100  | -1.62311500 | -1.20555900 |
| H | 5.29108100  | -4.52430500 | -3.20005400 |
| H | 4.44342500  | -4.00706600 | -4.65376300 |
| C | 5.50045300  | 0.98408500  | -0.57867000 |
| C | 3.25684800  | 1.53558100  | -1.37156800 |
| O | 1.75686500  | -0.25910000 | -2.00544100 |
| C | 2.27170500  | -5.15241000 | -3.13358800 |
| C | 0.76835200  | -4.19945700 | -1.46215400 |
| O | 1.44630400  | -2.17434500 | -0.29011800 |
| H | 6.44754600  | 1.30474300  | -0.15741800 |
| C | 4.51472800  | 1.92196500  | -0.88465100 |
| P | 0.71767300  | -0.85620600 | -0.90809700 |
| H | 2.47000300  | -5.90071300 | -3.89455700 |
| C | 1.07654100  | -5.18044200 | -2.41727400 |
| H | 4.69983400  | 2.97899400  | -0.72568600 |
| O | 0.71722400  | 0.11656200  | 0.34972300  |
| O | -0.60613200 | -1.07040200 | -1.51845200 |
| H | 0.34147100  | -5.95398200 | -2.61245500 |
| H | 1.54756800  | 0.13456100  | 0.86717100  |
| C | 4.76937300  | -2.39561800 | -3.17626400 |
| H | 4.24007800  | -1.72569400 | -3.86172700 |
| H | 5.82651400  | -2.12273400 | -3.18957700 |
| C | 0.53149000  | 4.98015600  | 1.38693800  |
| C | 0.26062300  | 5.26416800  | 0.07600300  |
| C | 0.80957100  | 4.47194600  | -0.98049400 |
| C | 1.68948000  | 3.37346300  | -0.65141900 |
| C | 1.93812200  | 3.11289600  | 0.73316000  |
| C | 1.37203000  | 3.87914700  | 1.71647300  |
| C | 0.50633100  | 4.73328600  | -2.31802900 |
| C | 2.24620000  | 2.58795800  | -1.68679300 |
| C | 1.93354700  | 2.86912200  | -3.03790200 |
| C | 1.04370000  | 3.96219800  | -3.35165200 |
| C | 0.74006200  | 4.24663800  | -4.71806100 |
| H | 0.05350900  | 5.05956800  | -4.93137400 |
| C | 1.29530900  | 3.51269100  | -5.72979500 |
| C | 2.18593200  | 2.44415000  | -5.42725000 |
| C | 2.49229500  | 2.13138100  | -4.12908000 |
| H | -0.16889100 | 5.54813800  | -2.56212400 |
| H | 0.11346600  | 5.59094200  | 2.18013100  |
| H | -0.37946600 | 6.09994800  | -0.19102700 |
| H | 2.58942100  | 2.29277700  | 0.99428300  |
| H | 1.56830600  | 3.64984200  | 2.75791800  |
| H | 1.06255500  | 3.74090900  | -6.76483200 |

|   |             |             |             |
|---|-------------|-------------|-------------|
| H | 2.62835400  | 1.87350500  | -6.23764500 |
| H | 3.18032500  | 1.32262600  | -3.91634400 |
| C | -4.09789800 | -3.48943400 | -3.00907500 |
| C | -4.19416000 | -3.85496200 | -1.69042500 |
| C | -3.02202900 | -4.09251700 | -0.91124400 |
| C | -1.72634200 | -3.94835500 | -1.52962500 |
| C | -1.67788400 | -3.50554000 | -2.88860600 |
| C | -2.82389800 | -3.29238000 | -3.60716400 |
| C | -3.10614000 | -4.50015100 | 0.42327500  |
| C | -0.56284400 | -4.25000400 | -0.79025500 |
| C | -0.66273900 | -4.69803700 | 0.54572100  |
| C | -1.96223300 | -4.81427100 | 1.16355900  |
| C | -2.04881700 | -5.26539200 | 2.51566100  |
| H | -3.03312300 | -5.35782900 | 2.96622200  |
| C | -0.92187900 | -5.58486700 | 3.22687700  |
| C | 0.35944400  | -5.47783100 | 2.61815000  |
| C | 0.48382300  | -5.05512200 | 1.31957900  |
| H | -4.08411100 | -4.60712400 | 0.88559500  |
| H | -4.99331800 | -3.35919200 | -3.60879800 |
| H | -5.16296200 | -3.98946100 | -1.21902100 |
| H | -0.71167400 | -3.33969500 | -3.34593500 |
| H | -2.76182200 | -2.97331100 | -4.64260200 |
| H | -1.00118300 | -5.93124600 | 4.25226300  |
| H | 1.24401800  | -5.74612700 | 3.18678900  |
| H | 1.46274700  | -4.99102600 | 0.85917600  |
| C | -4.14279700 | -1.07262000 | 4.87690000  |
| C | -3.49138300 | -0.06885700 | 2.83731900  |
| C | -3.99527200 | -1.41904300 | 3.38883700  |
| H | -5.03270100 | -0.44974300 | 5.02375400  |
| H | -4.25540100 | -1.95789700 | 5.50712800  |
| H | -4.36359200 | 0.59373600  | 2.90631300  |
| H | -4.94363700 | -1.72973200 | 2.94862800  |
| H | -3.28014700 | -2.22603400 | 3.23973600  |
| N | -3.01011600 | 0.06012600  | 1.47011300  |
| H | -2.12296500 | 0.53269500  | 1.33389100  |
| C | -3.72653400 | -0.12737900 | 0.34459300  |
| C | -4.95621600 | -0.79522100 | 0.28693100  |
| C | -3.16883800 | 0.42340400  | -0.88089200 |
| C | -5.57624100 | -1.00681400 | -0.93611100 |
| H | -5.42940300 | -1.18346500 | 1.17434900  |
| C | -3.78833800 | 0.15542200  | -2.10781900 |
| C | -4.97516600 | -0.54758300 | -2.14414900 |
| H | -3.35946500 | 0.53441700  | -3.02097000 |
| H | -5.45073600 | -0.73182700 | -3.09707800 |

|   |             |             |             |
|---|-------------|-------------|-------------|
| O | -6.74502200 | -1.67348000 | -0.89515600 |
| C | -7.50381100 | -1.84322800 | -2.09517200 |
| H | -6.96567900 | -2.46247500 | -2.81897900 |
| H | -8.41787800 | -2.35166700 | -1.79233000 |
| H | -7.75309600 | -0.87640500 | -2.54362900 |
| O | -2.12454000 | 1.21137800  | -0.68470900 |
| C | -1.37646400 | 1.78257900  | -1.80368600 |
| H | -0.56264900 | 2.29430200  | -1.29331700 |
| H | -0.96818600 | 0.94310400  | -2.35607500 |
| C | -2.16052800 | 2.72071200  | -2.67853700 |
| C | -2.87444000 | 3.79736600  | -2.11741000 |
| C | -2.09581500 | 2.54643500  | -4.07676500 |
| C | -3.52006100 | 4.69554100  | -2.97226200 |
| C | -2.75295600 | 3.46741600  | -4.89877900 |
| C | -3.45973900 | 4.53585700  | -4.35435500 |
| H | -4.07005200 | 5.52940300  | -2.54582100 |
| H | -2.70058200 | 3.34468200  | -5.97631900 |
| H | -3.96174100 | 5.24426000  | -5.00596500 |
| C | -1.32634500 | 1.40651800  | -4.70637600 |
| H | -1.40730100 | 1.45068200  | -5.79415700 |
| H | -0.26296800 | 1.44155900  | -4.45704000 |
| H | -1.69373000 | 0.42396700  | -4.38538300 |
| C | -2.95925600 | 3.99744400  | -0.62469500 |
| H | -1.99589100 | 3.83200200  | -0.13775300 |
| H | -3.28484300 | 5.01421300  | -0.39160900 |
| H | -3.67292400 | 3.31018600  | -0.15864400 |
| C | -0.13916500 | 1.21830600  | 4.42897700  |
| C | -0.94345000 | 0.29363500  | 3.72949000  |
| C | -0.30270700 | -0.83102200 | 3.15490900  |
| C | 1.08620500  | -0.96288000 | 3.29970400  |
| C | 1.83035600  | -0.02148200 | 3.97977300  |
| C | 1.23884400  | 1.09047300  | 4.55620100  |
| H | -0.61298500 | 2.07089000  | 4.89752300  |
| H | 1.58326900  | -1.82026400 | 2.85996800  |
| H | 1.83026700  | 1.82176600  | 5.09324900  |
| C | -2.46949700 | 0.51327300  | 3.89791400  |
| C | -2.86357600 | -0.28666700 | 5.19474200  |
| H | -2.06050700 | -0.99476000 | 5.41087200  |
| H | -2.94466900 | 0.36292400  | 6.06761000  |
| C | -2.79982600 | 2.01569600  | 3.93260800  |
| C | -3.74732700 | 2.54002200  | 4.81824100  |
| C | -2.25706100 | 2.87260000  | 2.96126000  |
| C | -4.13542700 | 3.87936800  | 4.74775300  |
| H | -4.20264000 | 1.90542900  | 5.57026700  |

|   |             |             |            |
|---|-------------|-------------|------------|
| C | -2.64749300 | 4.20798200  | 2.88593800 |
| H | -1.49625900 | 2.51191800  | 2.27574800 |
| C | -3.58909000 | 4.71895500  | 3.77966700 |
| H | -4.86735500 | 4.26170200  | 5.45218800 |
| H | -2.20626300 | 4.84607700  | 2.12905600 |
| H | -3.89035700 | 5.75995300  | 3.72354800 |
| C | -0.94201900 | -1.97849800 | 2.41996800 |
| H | -1.31666900 | -2.72918600 | 3.12117600 |
| H | -1.75213000 | -1.69551200 | 1.75730200 |
| H | -0.19235400 | -2.47271200 | 1.80667600 |
| O | 3.22889200  | -0.21429900 | 4.10132200 |
| S | 4.13088900  | 0.03028600  | 2.75998800 |
| O | 5.21478400  | -0.92959600 | 2.75807300 |
| O | 3.25349700  | 0.21001200  | 1.60723300 |
| C | 4.83406800  | 1.70807800  | 3.21058400 |
| F | 5.62320100  | 2.13224800  | 2.23204600 |
| F | 5.51869000  | 1.59543100  | 4.33845700 |
| F | 3.82147500  | 2.56262600  | 3.37531300 |

#### RS-TS1

Sum of electronic and thermal Free Energies = -4858.915567

|   |            |             |            |
|---|------------|-------------|------------|
| C | 2.61965700 | -0.68439600 | 3.63770800 |
| C | 4.11123200 | -0.25339200 | 3.78059100 |
| C | 2.69787800 | -1.53353900 | 2.38224500 |
| C | 1.63863500 | 0.46136500  | 3.80935800 |
| H | 4.29610200 | 0.59725800  | 3.11680600 |
| H | 4.36004700 | 0.05138200  | 4.79983600 |
| C | 4.91185700 | -1.48393700 | 3.29133800 |
| C | 1.76265200 | -0.61366100 | 5.94502200 |
| C | 3.96502500 | -2.13175300 | 2.30433000 |
| C | 1.73471300 | -1.87342600 | 1.44408400 |
| C | 1.20202600 | 0.53447500  | 5.14118700 |
| C | 1.17003300 | 1.39590900  | 2.89471600 |
| H | 5.85933600 | -1.20417700 | 2.82095100 |
| H | 5.15285400 | -2.16294200 | 4.11813300 |
| H | 2.61529700 | -0.28222000 | 6.55134200 |
| H | 1.03077500 | -1.04542800 | 6.63358700 |
| C | 4.20806700 | -3.14975000 | 1.39020100 |
| C | 1.92764000 | -2.93068400 | 0.54203900 |
| O | 0.55031300 | -1.10603400 | 1.34849500 |
| C | 0.34775100 | 1.54974700  | 5.55548100 |
| C | 0.31673700 | 2.44034200  | 3.28025200 |
| O | 1.55832600 | 1.26888100  | 1.54467600 |
| H | 5.18283800 | -3.62260300 | 1.33565900 |

|   |             |             |             |
|---|-------------|-------------|-------------|
| C | 3.17721800  | -3.56776300 | 0.54589800  |
| P | 0.67308800  | 0.31786400  | 0.57889700  |
| H | 0.01016300  | 1.60432400  | 6.58565300  |
| C | -0.07494500 | 2.49887600  | 4.62805000  |
| H | 3.33343300  | -4.39370500 | -0.13999200 |
| O | 1.62306900  | 0.14511300  | -0.66752500 |
| O | -0.66552800 | 0.83487500  | 0.22654100  |
| H | -0.73183600 | 3.30580100  | 4.93433000  |
| H | 2.57991800  | -0.00454300 | -0.50011500 |
| C | 2.20597100  | -1.59485200 | 4.84512200  |
| H | 1.35379800  | -2.21024600 | 4.53783200  |
| H | 3.01109300  | -2.26636000 | 5.15034800  |
| C | 0.83495800  | -3.11936300 | -4.53512300 |
| C | -0.15893400 | -3.82682300 | -3.91752700 |
| C | -0.18944700 | -3.96409400 | -2.49577300 |
| C | 0.83899500  | -3.32794800 | -1.70417900 |
| C | 1.85621200  | -2.59606000 | -2.39275600 |
| C | 1.85658400  | -2.50419400 | -3.75896000 |
| C | -1.18013300 | -4.71480700 | -1.85790700 |
| C | 0.81815600  | -3.46414600 | -0.30039600 |
| C | -0.19388500 | -4.22335800 | 0.33378700  |
| C | -1.20385200 | -4.87092500 | -0.46903900 |
| C | -2.18610700 | -5.68768900 | 0.16928500  |
| H | -2.93871300 | -6.16525200 | -0.44960100 |
| C | -2.18216300 | -5.86636700 | 1.52424500  |
| C | -1.19503100 | -5.22400900 | 2.32080000  |
| C | -0.23541400 | -4.43122100 | 1.74906800  |
| H | -1.93457600 | -5.21537300 | -2.45914400 |
| H | 0.85136600  | -3.02587900 | -5.61604000 |
| H | -0.94332100 | -4.30418600 | -4.49748900 |
| H | 2.63441800  | -2.11874300 | -1.81390700 |
| H | 2.64554900  | -1.95649000 | -4.26036800 |
| H | -2.93665000 | -6.48358800 | 1.99761000  |
| H | -1.20145300 | -5.37042600 | 3.39627900  |
| H | 0.52324700  | -3.97122900 | 2.37029200  |
| C | -4.28614700 | 3.90106000  | 1.43164600  |
| C | -3.41215300 | 4.88727300  | 1.05482100  |
| C | -2.01969700 | 4.79317600  | 1.36372400  |
| C | -1.53454500 | 3.63179500  | 2.07334400  |
| C | -2.48163400 | 2.61982300  | 2.42929500  |
| C | -3.81119000 | 2.75486600  | 2.12816700  |
| C | -1.11159600 | 5.76882800  | 0.94186700  |
| C | -0.15661800 | 3.51943000  | 2.36732500  |
| C | 0.75328200  | 4.50362800  | 1.91907100  |

|   |             |             |             |
|---|-------------|-------------|-------------|
| C | 0.26070100  | 5.64325400  | 1.18035800  |
| C | 1.18774600  | 6.63139500  | 0.72704700  |
| H | 0.80325400  | 7.48244000  | 0.17231200  |
| C | 2.52474200  | 6.51946600  | 0.99618300  |
| C | 3.01125800  | 5.40894700  | 1.74310900  |
| C | 2.15588200  | 4.43789900  | 2.19135300  |
| H | -1.47909100 | 6.63947100  | 0.40517300  |
| H | -5.34206500 | 3.98446800  | 1.19476700  |
| H | -3.76227100 | 5.76545800  | 0.51964100  |
| H | -2.12847700 | 1.72456300  | 2.92398100  |
| H | -4.50640500 | 1.97005300  | 2.40242500  |
| H | 3.21812700  | 7.28014900  | 0.65243300  |
| H | 4.07133700  | 5.33982700  | 1.96565700  |
| H | 2.53821400  | 3.60587100  | 2.76939700  |
| C | -1.29111400 | 4.53973400  | -2.48048100 |
| C | -2.73704900 | 2.77332700  | -1.48276100 |
| C | -1.39238200 | 3.39388800  | -1.52714700 |
| H | -2.11784300 | 4.74006400  | -3.15376300 |
| H | -0.70464500 | 5.40012600  | -2.18518600 |
| H | -3.57675800 | 3.29438900  | -1.93125000 |
| H | -1.15746000 | 3.72523000  | -0.51021600 |
| H | -0.65722700 | 2.60536700  | -1.72319600 |
| N | -2.98712800 | 1.65451800  | -0.88804900 |
| H | -2.20268400 | 1.18510200  | -0.38797800 |
| C | -4.26893700 | 1.06485800  | -0.75072800 |
| C | -5.34655900 | 1.44243900  | -1.54707400 |
| C | -4.41932800 | 0.10996000  | 0.27024300  |
| C | -6.60911300 | 0.89138000  | -1.30917800 |
| H | -5.24024800 | 2.13362200  | -2.37361700 |
| C | -5.69315200 | -0.39686800 | 0.52642000  |
| C | -6.78338600 | -0.01736800 | -0.25406200 |
| H | -5.82056400 | -1.10239700 | 1.33685300  |
| H | -7.75696400 | -0.43838700 | -0.03970700 |
| O | -7.59236100 | 1.30440400  | -2.14745500 |
| C | -8.90214300 | 0.77572300  | -1.96106500 |
| H | -9.30390500 | 1.04290700  | -0.97685300 |
| H | -9.51820800 | 1.22743600  | -2.73781400 |
| H | -8.91173500 | -0.31440600 | -2.07580600 |
| O | -3.31852600 | -0.24365100 | 0.99916900  |
| C | -2.74738800 | -1.54993300 | 0.63946700  |
| H | -2.52622800 | -1.54165700 | -0.42846600 |
| H | -1.80344500 | -1.57684800 | 1.17691700  |
| C | -3.66204400 | -2.67384100 | 1.03177900  |
| C | -4.44213100 | -3.34614300 | 0.07192700  |

|   |             |             |             |
|---|-------------|-------------|-------------|
| C | -3.78503300 | -2.98568900 | 2.40056600  |
| C | -5.34769600 | -4.32360100 | 0.50052100  |
| C | -4.69879500 | -3.96646000 | 2.79404200  |
| C | -5.48132200 | -4.63016200 | 1.85071100  |
| H | -5.95509600 | -4.84253900 | -0.23531500 |
| H | -4.79805300 | -4.20836000 | 3.84821400  |
| H | -6.19182000 | -5.38684700 | 2.16919000  |
| C | -2.95152800 | -2.26819400 | 3.43424300  |
| H | -3.21267400 | -2.59804000 | 4.44231500  |
| H | -1.88439400 | -2.46487200 | 3.28127900  |
| H | -3.09314900 | -1.18507100 | 3.37654700  |
| C | -4.34186700 | -3.03167300 | -1.40211000 |
| H | -3.32376000 | -3.17466300 | -1.77651500 |
| H | -5.00113600 | -3.68528700 | -1.97831500 |
| H | -4.63217000 | -1.99787900 | -1.61468000 |
| C | 2.46975800  | 1.04910500  | -4.04918200 |
| C | 1.81802400  | 2.09732200  | -3.37542500 |
| C | 2.47561700  | 2.72500800  | -2.29085800 |
| C | 3.73853800  | 2.25884100  | -1.90928100 |
| C | 4.32687000  | 1.20086700  | -2.57752400 |
| C | 3.72323300  | 0.58670800  | -3.66403900 |
| H | 1.96719900  | 0.57737600  | -4.88619200 |
| H | 4.24953700  | 2.70779000  | -1.06425800 |
| H | 4.21893200  | -0.22374900 | -4.18308700 |
| C | 0.45896100  | 2.47617400  | -3.87052500 |
| C | 0.19980400  | 3.76461100  | -4.24692300 |
| H | 0.99207800  | 4.50392600  | -4.23723800 |
| H | -0.67331900 | 4.02712700  | -4.82599900 |
| C | -0.60753200 | 1.44975900  | -3.87610900 |
| C | -1.86094900 | 1.69267000  | -4.48163100 |
| C | -0.45860100 | 0.25026800  | -3.15409800 |
| C | -2.90981200 | 0.78637300  | -4.35981200 |
| H | -2.01602200 | 2.58830500  | -5.07187300 |
| C | -1.51281300 | -0.65353700 | -3.03025300 |
| H | 0.47646000  | 0.03082500  | -2.66045000 |
| C | -2.74467500 | -0.39281100 | -3.62783400 |
| H | -3.85737100 | 0.99532000  | -4.84736100 |
| H | -1.35657100 | -1.56701800 | -2.46892900 |
| H | -3.56291800 | -1.09801500 | -3.53429400 |
| C | 1.87403500  | 3.80871700  | -1.43608300 |
| H | 1.30143300  | 3.36790400  | -0.61473600 |
| H | 2.65425300  | 4.41698000  | -0.97739400 |
| H | 1.21438000  | 4.46784300  | -1.98998300 |
| O | 5.59262300  | 0.73897400  | -2.12903600 |

|   |            |             |             |
|---|------------|-------------|-------------|
| S | 5.59886500 | -0.30898200 | -0.87589900 |
| O | 6.70549800 | 0.01362800  | -0.00079800 |
| O | 4.24152900 | -0.47593100 | -0.35536500 |
| C | 6.03809400 | -1.87005100 | -1.81362900 |
| F | 6.20638100 | -2.85896800 | -0.94398800 |
| F | 7.15454000 | -1.66155200 | -2.49405800 |
| F | 5.04238900 | -2.16792600 | -2.65044000 |

### RS-III

Sum of electronic and thermal Free Energies = -4858.964177

|   |             |             |             |
|---|-------------|-------------|-------------|
| C | 2.71881300  | -0.57905600 | 3.57988100  |
| C | 4.20778200  | -0.12840200 | 3.67647900  |
| C | 2.77491500  | -1.45090600 | 2.33862400  |
| C | 1.72554400  | 0.55510800  | 3.75389700  |
| H | 4.36607200  | 0.70992100  | 2.99061000  |
| H | 4.47851800  | 0.19982900  | 4.68279100  |
| C | 5.00955000  | -1.36026000 | 3.19236000  |
| C | 1.91113700  | -0.47951400 | 5.90451200  |
| C | 4.04596900  | -2.03814100 | 2.24231600  |
| C | 1.79260700  | -1.81821300 | 1.43071600  |
| C | 1.31238100  | 0.64277200  | 5.09197900  |
| C | 1.22336000  | 1.46459000  | 2.83177100  |
| H | 5.94259700  | -1.08003100 | 2.69405000  |
| H | 5.27833900  | -2.01976100 | 4.02633300  |
| H | 2.77136100  | -0.12158600 | 6.48456100  |
| H | 1.20297200  | -0.91081300 | 6.61771200  |
| C | 4.27792800  | -3.07170200 | 1.34305000  |
| C | 1.97394000  | -2.89505900 | 0.54921800  |
| O | 0.60174300  | -1.06037500 | 1.34210600  |
| C | 0.44350900  | 1.64662300  | 5.50394600  |
| C | 0.35075400  | 2.49369900  | 3.21333200  |
| O | 1.59554200  | 1.32384500  | 1.47941700  |
| H | 5.25532900  | -3.53677700 | 1.27495100  |
| C | 3.23067600  | -3.51824200 | 0.53446800  |
| P | 0.70761300  | 0.34942400  | 0.53987500  |
| H | 0.12325400  | 1.71265500  | 6.53896600  |
| C | -0.01882800 | 2.56713800  | 4.56705900  |
| H | 3.37742500  | -4.35931900 | -0.13492000 |
| O | 1.65440100  | 0.14809300  | -0.70638000 |
| O | -0.63661000 | 0.84937000  | 0.18449400  |
| H | -0.69120400 | 3.36238400  | 4.87007100  |
| H | 2.61509300  | 0.03188100  | -0.53604300 |
| C | 2.34688800  | -1.47339900 | 4.81317800  |
| H | 1.49843900  | -2.10813900 | 4.53649900  |



|   |             |             |             |
|---|-------------|-------------|-------------|
| H | 3.16937400  | -2.12614100 | 5.11271900  |
| C | 0.79128500  | -3.37932700 | -4.48875300 |
| C | -0.17987700 | -4.06537600 | -3.81362400 |
| C | -0.18788100 | -4.11424400 | -2.38584200 |
| C | 0.84031500  | -3.41359000 | -1.65020100 |
| C | 1.82968700  | -2.70109600 | -2.39759600 |
| C | 1.80879200  | -2.69497900 | -3.76709600 |
| C | -1.15668700 | -4.84042400 | -1.68883100 |
| C | 0.84848500  | -3.47316600 | -0.24070900 |
| C | -0.14033100 | -4.21133700 | 0.45342300  |
| C | -1.15588800 | -4.91508100 | -0.29320100 |
| C | -2.11570400 | -5.70756000 | 0.40689800  |
| H | -2.87326200 | -6.22690000 | -0.17092600 |
| C | -2.08406000 | -5.81298700 | 1.76900500  |
| C | -1.08948300 | -5.11820700 | 2.51007200  |
| C | -0.15118200 | -4.34607400 | 1.87812100  |
| H | -1.91137400 | -5.38806600 | -2.24718500 |
| H | 0.79288500  | -3.35483400 | -5.57353000 |
| H | -0.96231000 | -4.59321800 | -4.35096700 |
| H | 2.60182800  | -2.16838200 | -1.85988800 |
| H | 2.57883300  | -2.16661500 | -4.31726800 |
| H | -2.82162600 | -6.41240100 | 2.28950900  |
| H | -1.07292700 | -5.20716800 | 3.59169400  |
| H | 0.61345400  | -3.84616400 | 2.45956200  |
| C | -4.34415500 | 3.81163700  | 1.51619200  |
| C | -3.51604000 | 4.82951600  | 1.12364400  |
| C | -2.10837500 | 4.76625000  | 1.36537400  |
| C | -1.56358300 | 3.61346400  | 2.04382800  |
| C | -2.46543200 | 2.56966000  | 2.42214700  |
| C | -3.80821300 | 2.66690200  | 2.16991600  |
| C | -1.24192900 | 5.76712500  | 0.91114300  |
| C | -0.17439600 | 3.54322800  | 2.29402500  |
| C | 0.69197000  | 4.55012300  | 1.81223100  |
| C | 0.14208600  | 5.67512000  | 1.09192000  |
| C | 1.02484900  | 6.68881100  | 0.60726400  |
| H | 0.59791800  | 7.52754300  | 0.06491200  |
| C | 2.37212700  | 6.61797600  | 0.83577800  |
| C | 2.91461500  | 5.52492400  | 1.56993500  |
| C | 2.10333000  | 4.52744400  | 2.04217600  |
| H | -1.65331700 | 6.63471500  | 0.40133600  |
| H | -5.41082200 | 3.86804600  | 1.32393100  |
| H | -3.91307900 | 5.70559700  | 0.61843300  |
| H | -2.06645100 | 1.67930500  | 2.89016600  |
| H | -4.46804900 | 1.85497800  | 2.45261900  |

|   |             |             |             |
|---|-------------|-------------|-------------|
| H | 3.03139300  | 7.39849600  | 0.47008400  |
| H | 3.98234700  | 5.48945000  | 1.76188100  |
| H | 2.52804200  | 3.70764100  | 2.60795700  |
| C | -1.13301100 | 4.33546300  | -2.80535800 |
| C | -2.73886700 | 2.69430500  | -1.68209900 |
| C | -1.45293600 | 3.41601500  | -1.61143000 |
| H | -2.06888400 | 4.65872700  | -3.27367800 |
| H | -0.67648400 | 5.24195600  | -2.40191100 |
| H | -3.55444000 | 3.13350900  | -2.24716000 |
| H | -1.55210500 | 4.04719700  | -0.71979400 |
| H | -0.65435400 | 2.71205900  | -1.37716800 |
| N | -3.00617000 | 1.64336000  | -0.97427500 |
| H | -2.24248800 | 1.22982900  | -0.40459600 |
| C | -4.28074800 | 1.04196000  | -0.82402600 |
| C | -5.37882000 | 1.40814000  | -1.59728300 |
| C | -4.40620500 | 0.09270000  | 0.20630600  |
| C | -6.62922400 | 0.83924000  | -1.33930900 |
| H | -5.30613700 | 2.11376600  | -2.41485500 |
| C | -5.66925000 | -0.42739500 | 0.48694300  |
| C | -6.77615500 | -0.06865300 | -0.27979800 |
| H | -5.77589100 | -1.12587100 | 1.30626800  |
| H | -7.74151300 | -0.49817600 | -0.04611300 |
| O | -7.63183600 | 1.24207500  | -2.16039600 |
| C | -8.93379700 | 0.70570500  | -1.94548000 |
| H | -9.31691000 | 0.97299600  | -0.95384000 |
| H | -9.56890300 | 1.15106800  | -2.71053300 |
| H | -8.93904400 | -0.38484000 | -2.05688900 |
| O | -3.28936400 | -0.23305100 | 0.92431100  |
| C | -2.71870500 | -1.54978500 | 0.61090500  |
| H | -2.54543600 | -1.59873700 | -0.46416800 |
| H | -1.75167600 | -1.53723100 | 1.10658700  |
| C | -3.60084500 | -2.65856000 | 1.10833000  |
| C | -4.40197300 | -3.40432400 | 0.22308900  |
| C | -3.67260700 | -2.87930100 | 2.49832800  |
| C | -5.27898700 | -4.36116000 | 0.74698700  |
| C | -4.55835700 | -3.84259100 | 2.98771400  |
| C | -5.36311000 | -4.57718800 | 2.11859900  |
| H | -5.90322600 | -4.93581500 | 0.06889500  |
| H | -4.61849800 | -4.01428700 | 4.05850100  |
| H | -6.05206900 | -5.31872300 | 2.51139800  |
| C | -2.81634500 | -2.08248100 | 3.45236200  |
| H | -3.02505800 | -2.36050500 | 4.48791700  |
| H | -1.75122600 | -2.25751400 | 3.26400000  |
| H | -2.99191500 | -1.00861300 | 3.33964500  |

|   |             |             |             |
|---|-------------|-------------|-------------|
| C | -4.35317700 | -3.18979300 | -1.27128500 |
| H | -3.34925600 | -3.36517400 | -1.66981800 |
| H | -5.03570400 | -3.87568900 | -1.77883000 |
| H | -4.64427600 | -2.17034400 | -1.54273400 |
| C | 2.22622500  | 0.86282500  | -3.90765200 |
| C | 1.64422700  | 2.00317400  | -3.30746700 |
| C | 2.44166000  | 2.77040600  | -2.40354100 |
| C | 3.73139000  | 2.32761300  | -2.10631200 |
| C | 4.23844900  | 1.17713800  | -2.68790700 |
| C | 3.51355700  | 0.43906500  | -3.61042800 |
| H | 1.63895100  | 0.29692600  | -4.62044800 |
| H | 4.33792200  | 2.86572400  | -1.38617200 |
| H | 3.94671100  | -0.44031400 | -4.06934200 |
| C | 0.25406900  | 2.31834300  | -3.63590000 |
| C | -0.16965900 | 3.74091100  | -3.88504500 |
| H | 0.71294500  | 4.37271000  | -3.97480200 |
| H | -0.65353300 | 3.79451700  | -4.86687500 |
| C | -0.76387000 | 1.29559500  | -3.70008700 |
| C | -2.03605900 | 1.56684100  | -4.28025500 |
| C | -0.60401400 | 0.03279600  | -3.07216600 |
| C | -3.06414000 | 0.62984500  | -4.25063800 |
| H | -2.20523100 | 2.50505900  | -4.79508300 |
| C | -1.64219800 | -0.88740200 | -3.03219400 |
| H | 0.32715900  | -0.20435800 | -2.57952800 |
| C | -2.87943400 | -0.60133300 | -3.61907800 |
| H | -4.01343800 | 0.86121300  | -4.72411700 |
| H | -1.47985100 | -1.83828200 | -2.53935000 |
| H | -3.68382300 | -1.32757900 | -3.58728500 |
| C | 1.96136800  | 3.98369800  | -1.64691900 |
| H | 1.05428000  | 3.77846000  | -1.07866300 |
| H | 2.71321500  | 4.29847600  | -0.92416100 |
| H | 1.76044200  | 4.83971700  | -2.29515400 |
| O | 5.53459400  | 0.74689000  | -2.30850700 |
| S | 5.63646100  | -0.19738000 | -0.97521000 |
| O | 6.77726300  | 0.21890100  | -0.18772400 |
| O | 4.31237200  | -0.35416500 | -0.37141200 |
| C | 6.07644500  | -1.81375900 | -1.81445500 |
| F | 6.38438300  | -2.70787700 | -0.88255700 |
| F | 7.11053800  | -1.61354100 | -2.61671500 |
| F | 5.02647800  | -2.23751300 | -2.52047600 |

## RS-TS2

*B3LYP-D3/6-31G(d,p):*

Sum of electronic and thermal Free Energies = -4858.940436

SMD//M062X/6-3I+G(d,p):

Sum of electronic and thermal Free Energies = -4856.909512

|   |             |             |             |
|---|-------------|-------------|-------------|
| C | 4.43492600  | -2.18645100 | -1.56383100 |
| C | 5.04458900  | -3.09514800 | -0.45353900 |
| C | 4.32937700  | -0.87003700 | -0.81219100 |
| C | 3.27196700  | -2.81992000 | -2.31273600 |
| H | 4.23827400  | -3.44039300 | 0.20148400  |
| H | 5.54655800  | -3.97392400 | -0.86524300 |
| C | 5.99401300  | -2.15409800 | 0.32786000  |
| C | 5.21021300  | -3.21191200 | -3.66469700 |
| C | 5.34979700  | -0.79636600 | 0.14796700  |
| C | 3.50493700  | 0.22979400  | -1.00247300 |
| C | 3.73143400  | -3.45060200 | -3.47965300 |
| C | 1.91595000  | -2.87374500 | -2.00807800 |
| H | 6.08195200  | -2.42816300 | 1.38348700  |
| H | 7.00806200  | -2.17044400 | -0.08948300 |
| H | 5.78749400  | -4.09059400 | -3.34948200 |
| H | 5.47958300  | -3.00993800 | -4.70524600 |
| C | 5.62417200  | 0.40668800  | 0.79021300  |
| C | 3.78474300  | 1.47546600  | -0.41766100 |
| O | 2.29073500  | 0.07177400  | -1.70527900 |
| C | 2.86017900  | -4.15531200 | -4.30187500 |
| C | 1.00852500  | -3.57394100 | -2.82008200 |
| O | 1.46430500  | -2.22081600 | -0.84518800 |
| H | 6.41240600  | 0.47136300  | 1.53336300  |
| C | 4.87805000  | 1.54029700  | 0.46256200  |
| P | 1.10428400  | -0.63907700 | -0.86029500 |
| H | 3.21992500  | -4.64034800 | -5.20382600 |
| C | 1.51100700  | -4.21871000 | -3.96047900 |
| H | 5.11290500  | 2.49503300  | 0.92029700  |
| O | 1.25481100  | -0.25140200 | 0.66591300  |
| O | -0.23212800 | -0.27408300 | -1.37386900 |
| H | 0.81302100  | -4.76228200 | -4.58842400 |
| H | 2.02381400  | -0.56726600 | 1.18321800  |
| C | 5.46378900  | -2.01301000 | -2.73497100 |
| H | 5.23189200  | -1.08335000 | -3.26467900 |
| H | 6.49191500  | -1.94368300 | -2.37379900 |
| C | 1.06381200  | 4.92218800  | 2.33962300  |
| C | 1.05411700  | 5.38935800  | 1.05293400  |
| C | 1.67464100  | 4.65539100  | -0.00510600 |
| C | 2.34094300  | 3.41003200  | 0.29535100  |
| C | 2.29783600  | 2.94675100  | 1.64781500  |
| C | 1.68906900  | 3.67728000  | 2.63556200  |

|   |             |             |             |
|---|-------------|-------------|-------------|
| C | 1.62727700  | 5.10950900  | -1.32313500 |
| C | 2.98796900  | 2.69253000  | -0.73721700 |
| C | 2.93731000  | 3.17037900  | -2.07022400 |
| C | 2.22674300  | 4.39326400  | -2.36044900 |
| C | 2.13997200  | 4.85178500  | -3.71013900 |
| H | 1.58729100  | 5.76546500  | -3.90393600 |
| C | 2.73034900  | 4.15638100  | -4.72913700 |
| C | 3.46396700  | 2.97047300  | -4.44475600 |
| C | 3.57058400  | 2.50044400  | -3.16304600 |
| H | 1.09215000  | 6.02658600  | -1.55061300 |
| H | 0.59801400  | 5.49346500  | 3.13631400  |
| H | 0.57291500  | 6.33047100  | 0.80521400  |
| H | 2.75469900  | 1.99590300  | 1.88117900  |
| H | 1.68468300  | 3.30092200  | 3.65364100  |
| H | 2.65725500  | 4.51108600  | -5.75215600 |
| H | 3.95118400  | 2.43812400  | -5.25553000 |
| H | 4.14909000  | 1.60633400  | -2.96868400 |
| C | -3.20815900 | -0.81075100 | -3.99316200 |
| C | -3.66662100 | -1.87366900 | -3.26331400 |
| C | -2.76826600 | -2.87318100 | -2.77937700 |
| C | -1.35571500 | -2.73352500 | -3.04786600 |
| C | -0.92772300 | -1.62240700 | -3.83737100 |
| C | -1.82227100 | -0.69390500 | -4.29542400 |
| C | -3.22420000 | -3.98210000 | -2.05987600 |
| C | -0.45335800 | -3.68720300 | -2.53055000 |
| C | -0.92614200 | -4.80485000 | -1.80653600 |
| C | -2.34528700 | -4.95765300 | -1.57976900 |
| C | -2.81068600 | -6.08942700 | -0.84250100 |
| H | -3.88076800 | -6.20096400 | -0.69090900 |
| C | -1.93380400 | -7.01447800 | -0.34205200 |
| C | -0.53393500 | -6.85726000 | -0.54992300 |
| C | -0.04744100 | -5.79064200 | -1.25863200 |
| H | -4.29108500 | -4.09640000 | -1.88198900 |
| H | -3.90121900 | -0.05774700 | -4.35470400 |
| H | -4.72561700 | -1.98129000 | -3.04760700 |
| H | 0.12750500  | -1.51656200 | -4.05785400 |
| H | -1.47329100 | 0.14679400  | -4.88565000 |
| H | -2.30026700 | -7.87191200 | 0.21322300  |
| H | 0.15092400  | -7.59514200 | -0.14461300 |
| H | 1.01910400  | -5.68055100 | -1.41585600 |
| C | -1.82808800 | -3.67310900 | 1.85835800  |
| C | -2.73394100 | -1.77144100 | 0.59675700  |
| C | -1.51703500 | -2.63856400 | 0.75166700  |
| H | -1.98036500 | -4.66914300 | 1.43852900  |

|   |             |             |             |
|---|-------------|-------------|-------------|
| H | -0.98526900 | -3.73803400 | 2.55071100  |
| H | -3.67058500 | -2.27998800 | 0.39238300  |
| H | -1.25525500 | -3.10659800 | -0.19350600 |
| H | -0.67215100 | -2.01058500 | 1.03823000  |
| N | -2.61037500 | -0.57652200 | -0.03870300 |
| H | -1.66083700 | -0.25674200 | -0.28762100 |
| C | -3.63984600 | 0.29597900  | -0.32920500 |
| C | -4.96232000 | -0.11287500 | -0.50782200 |
| C | -3.30287000 | 1.68442900  | -0.36615400 |
| C | -5.96662900 | 0.83116500  | -0.68431700 |
| H | -5.22944000 | -1.15980200 | -0.50481700 |
| C | -4.31823800 | 2.62049700  | -0.54513000 |
| C | -5.64041700 | 2.20116800  | -0.69549900 |
| H | -4.08210900 | 3.67417200  | -0.58707000 |
| H | -6.40922100 | 2.94942300  | -0.83813100 |
| O | -7.22025400 | 0.33558900  | -0.85026400 |
| C | -8.29906200 | 1.25625400  | -0.96136600 |
| H | -8.19703400 | 1.89159200  | -1.84872100 |
| H | -9.19986200 | 0.65045900  | -1.05540900 |
| H | -8.37544700 | 1.88731800  | -0.06760400 |
| O | -1.99560500 | 1.93858800  | -0.16216100 |
| C | -1.51612200 | 3.27302300  | 0.11436900  |
| H | -2.01495500 | 3.62339500  | 1.01988000  |
| H | -0.46411000 | 3.10313100  | 0.35002400  |
| C | -1.65720800 | 4.26250400  | -1.01622600 |
| C | -2.16951100 | 5.54923500  | -0.74447100 |
| C | -1.20950300 | 3.92694400  | -2.31019600 |
| C | -2.24384200 | 6.48217800  | -1.78380600 |
| C | -1.31957200 | 4.88200300  | -3.32666500 |
| C | -1.83069800 | 6.15021200  | -3.07149000 |
| H | -2.63320600 | 7.47471000  | -1.57778800 |
| H | -0.97347300 | 4.62581100  | -4.32313700 |
| H | -1.90071900 | 6.88191100  | -3.87046500 |
| C | -0.59503100 | 2.58825400  | -2.62399900 |
| H | 0.10124900  | 2.26470300  | -1.84967500 |
| H | -1.34191200 | 1.79465800  | -2.70564200 |
| H | -0.04229300 | 2.63692200  | -3.56469800 |
| C | -2.63123600 | 5.95755800  | 0.63793400  |
| H | -2.97689600 | 6.99340700  | 0.63338000  |
| H | -3.46243300 | 5.33885100  | 0.99798400  |
| H | -1.82898600 | 5.87844500  | 1.37856600  |
| C | -1.32977800 | 0.09807200  | 2.63338100  |
| C | -1.91926500 | -1.02493600 | 3.23733900  |
| C | -1.31341600 | -1.53530500 | 4.41737500  |

|   |             |             |            |
|---|-------------|-------------|------------|
| C | -0.07226600 | -1.02226700 | 4.81757300 |
| C | 0.52525100  | 0.00523200  | 4.10433500 |
| C | -0.11367700 | 0.62510200  | 3.04724400 |
| H | -1.79225800 | 0.55040700  | 1.77036100 |
| H | 0.42604300  | -1.42681600 | 5.69114400 |
| H | 0.34593500  | 1.45072000  | 2.52338500 |
| C | -3.12648800 | -1.67104600 | 2.59068900 |
| C | -3.10696400 | -3.20159100 | 2.58622000 |
| H | -3.19328300 | -3.62670800 | 3.58397200 |
| H | -3.97364200 | -3.57184400 | 2.03601800 |
| C | -4.40885000 | -0.94350600 | 2.65255700 |
| C | -5.63834400 | -1.58588700 | 2.36927700 |
| C | -4.45196800 | 0.44396400  | 2.92066100 |
| C | -6.83040900 | -0.87680200 | 2.32758700 |
| H | -5.66435600 | -2.65167600 | 2.17904100 |
| C | -5.64602300 | 1.15314900  | 2.86535100 |
| H | -3.54269800 | 0.96544000  | 3.18631700 |
| C | -6.84103400 | 0.50112500  | 2.56190000 |
| H | -7.75563800 | -1.39696300 | 2.10372900 |
| H | -5.64334800 | 2.21923100  | 3.06747000 |
| H | -7.77392800 | 1.05408100  | 2.52420900 |
| C | -1.93833100 | -2.56944700 | 5.32750200 |
| H | -3.02491800 | -2.47075900 | 5.36935000 |
| H | -1.69740700 | -3.59359900 | 5.02424400 |
| H | -1.55744800 | -2.43997700 | 6.34296000 |
| O | 1.82159500  | 0.46354500  | 4.47575700 |
| S | 3.05020100  | -0.53298200 | 4.04854100 |
| O | 3.12486600  | -1.68522000 | 4.92743400 |
| O | 3.08671000  | -0.71379500 | 2.59488600 |
| C | 4.41623500  | 0.66933100  | 4.49124000 |
| F | 5.56304900  | 0.08818100  | 4.15011800 |
| F | 4.38627400  | 0.90530400  | 5.79325000 |
| F | 4.26110100  | 1.80052300  | 3.81285400 |

#### RS-IV

Sum of electronic and thermal Free Energies=-4858.953653

|   |            |             |             |
|---|------------|-------------|-------------|
| C | 4.13638800 | -2.24864900 | -1.75135900 |
| C | 5.15133700 | -2.73963400 | -0.67281800 |
| C | 4.03512800 | -0.77611800 | -1.38179000 |
| C | 2.93941400 | -3.17458500 | -1.88950300 |
| H | 4.61422600 | -2.90939300 | 0.26582800  |
| H | 5.64087000 | -3.67387600 | -0.95745300 |
| C | 6.12705400 | -1.55525600 | -0.50438100 |
| C | 4.50082800 | -3.85964200 | -3.57154800 |

|   |             |             |             |
|---|-------------|-------------|-------------|
| C | 5.25049200  | -0.36237800 | -0.81254100 |
| C | 3.03328300  | 0.16432000  | -1.59028800 |
| C | 3.18989100  | -4.14120600 | -2.87697900 |
| C | 1.72874500  | -3.20611200 | -1.20936300 |
| H | 6.54806400  | -1.50121100 | 0.50284700  |
| H | 6.96784100  | -1.62311500 | -1.20555900 |
| H | 5.29108100  | -4.52430500 | -3.20005400 |
| H | 4.44342500  | -4.00706600 | -4.65376300 |
| C | 5.50045300  | 0.98408500  | -0.57867000 |
| C | 3.25684800  | 1.53558100  | -1.37156800 |
| O | 1.75686500  | -0.25910000 | -2.00544100 |
| C | 2.27170500  | -5.15241000 | -3.13358800 |
| C | 0.76835200  | -4.19945700 | -1.46215400 |
| O | 1.44630400  | -2.17434500 | -0.29011800 |
| H | 6.44754600  | 1.30474300  | -0.15741800 |
| C | 4.51472800  | 1.92196500  | -0.88465100 |
| P | 0.71767300  | -0.85620600 | -0.90809700 |
| H | 2.47000300  | -5.90071300 | -3.89455700 |
| C | 1.07654100  | -5.18044200 | -2.41727400 |
| H | 4.69983400  | 2.97899400  | -0.72568600 |
| O | 0.71722400  | 0.11656200  | 0.34972300  |
| O | -0.60613200 | -1.07040200 | -1.51845200 |
| H | 0.34147100  | -5.95398200 | -2.61245500 |
| H | 1.54756800  | 0.13456100  | 0.86717100  |
| C | 4.76937300  | -2.39561800 | -3.17626400 |
| H | 4.24007800  | -1.72569400 | -3.86172700 |
| H | 5.82651400  | -2.12273400 | -3.18957700 |
| C | 0.53149000  | 4.98015600  | 1.38693800  |
| C | 0.26062300  | 5.26416800  | 0.07600300  |
| C | 0.80957100  | 4.47194600  | -0.98049400 |
| C | 1.68948000  | 3.37346300  | -0.65141900 |
| C | 1.93812200  | 3.11289600  | 0.73316000  |
| C | 1.37203000  | 3.87914700  | 1.71647300  |
| C | 0.50633100  | 4.73328600  | -2.31802900 |
| C | 2.24620000  | 2.58795800  | -1.68679300 |
| C | 1.93354700  | 2.86912200  | -3.03790200 |
| C | 1.04370000  | 3.96219800  | -3.35165200 |
| C | 0.74006200  | 4.24663800  | -4.71806100 |
| H | 0.05350900  | 5.05956800  | -4.93137400 |
| C | 1.29530900  | 3.51269100  | -5.72979500 |
| C | 2.18593200  | 2.44415000  | -5.42725000 |
| C | 2.49229500  | 2.13138100  | -4.12908000 |
| H | -0.16889100 | 5.54813800  | -2.56212400 |
| H | 0.11346600  | 5.59094200  | 2.18013100  |



|   |             |             |             |
|---|-------------|-------------|-------------|
| H | -0.37946600 | 6.09994800  | -0.19102700 |
| H | 2.58942100  | 2.29277700  | 0.99428300  |
| H | 1.56830600  | 3.64984200  | 2.75791800  |
| H | 1.06255500  | 3.74090900  | -6.76483200 |
| H | 2.62835400  | 1.87350500  | -6.23764500 |
| H | 3.18032500  | 1.32262600  | -3.91634400 |
| C | -4.09789800 | -3.48943400 | -3.00907500 |
| C | -4.19416000 | -3.85496200 | -1.69042500 |
| C | -3.02202900 | -4.09251700 | -0.91124400 |
| C | -1.72634200 | -3.94835500 | -1.52962500 |
| C | -1.67788400 | -3.50554000 | -2.88860600 |
| C | -2.82389800 | -3.29238000 | -3.60716400 |
| C | -3.10614000 | -4.50015100 | 0.42327500  |
| C | -0.56284400 | -4.25000400 | -0.79025500 |
| C | -0.66273900 | -4.69803700 | 0.54572100  |
| C | -1.96223300 | -4.81427100 | 1.16355900  |
| C | -2.04881700 | -5.26539200 | 2.51566100  |
| H | -3.03312300 | -5.35782900 | 2.96622200  |
| C | -0.92187900 | -5.58486700 | 3.22687700  |
| C | 0.35944400  | -5.47783100 | 2.61815000  |
| C | 0.48382300  | -5.05512200 | 1.31957900  |
| H | -4.08411100 | -4.60712400 | 0.88559500  |
| H | -4.99331800 | -3.35919200 | -3.60879800 |
| H | -5.16296200 | -3.98946100 | -1.21902100 |
| H | -0.71167400 | -3.33969500 | -3.34593500 |
| H | -2.76182200 | -2.97331100 | -4.64260200 |
| H | -1.00118300 | -5.93124600 | 4.25226300  |
| H | 1.24401800  | -5.74612700 | 3.18678900  |
| H | 1.46274700  | -4.99102600 | 0.85917600  |
| C | -4.14279700 | -1.07262000 | 4.87690000  |
| C | -3.49138300 | -0.06885700 | 2.83731900  |
| C | -3.99527200 | -1.41904300 | 3.38883700  |
| H | -5.03270100 | -0.44974300 | 5.02375400  |
| H | -4.25540100 | -1.95789700 | 5.50712800  |
| H | -4.36359200 | 0.59373600  | 2.90631300  |
| H | -4.94363700 | -1.72973200 | 2.94862800  |
| H | -3.28014700 | -2.22603400 | 3.23973600  |
| N | -3.01011600 | 0.06012600  | 1.47011300  |
| H | -2.12296500 | 0.53269500  | 1.33389100  |
| C | -3.72653400 | -0.12737900 | 0.34459300  |
| C | -4.95621600 | -0.79522100 | 0.28693100  |
| C | -3.16883800 | 0.42340400  | -0.88089200 |
| C | -5.57624100 | -1.00681400 | -0.93611100 |
| H | -5.42940300 | -1.18346500 | 1.17434900  |

|   |             |             |             |
|---|-------------|-------------|-------------|
| C | -3.78833800 | 0.15542200  | -2.10781900 |
| C | -4.97516600 | -0.54758300 | -2.14414900 |
| H | -3.35946500 | 0.53441700  | -3.02097000 |
| H | -5.45073600 | -0.73182700 | -3.09707800 |
| O | -6.74502200 | -1.67348000 | -0.89515600 |
| C | -7.50381100 | -1.84322800 | -2.09517200 |
| H | -6.96567900 | -2.46247500 | -2.81897900 |
| H | -8.41787800 | -2.35166700 | -1.79233000 |
| H | -7.75309600 | -0.87640500 | -2.54362900 |
| O | -2.12454000 | 1.21137800  | -0.68470900 |
| C | -1.37646400 | 1.78257900  | -1.80368600 |
| H | -0.56264900 | 2.29430200  | -1.29331700 |
| H | -0.96818600 | 0.94310400  | -2.35607500 |
| C | -2.16052800 | 2.72071200  | -2.67853700 |
| C | -2.87444000 | 3.79736600  | -2.11741000 |
| C | -2.09581500 | 2.54643500  | -4.07676500 |
| C | -3.52006100 | 4.69554100  | -2.97226200 |
| C | -2.75295600 | 3.46741600  | -4.89877900 |
| C | -3.45973900 | 4.53585700  | -4.35435500 |
| H | -4.07005200 | 5.52940300  | -2.54582100 |
| H | -2.70058200 | 3.34468200  | -5.97631900 |
| H | -3.96174100 | 5.24426000  | -5.00596500 |
| C | -1.32634500 | 1.40651800  | -4.70637600 |
| H | -1.40730100 | 1.45068200  | -5.79415700 |
| H | -0.26296800 | 1.44155900  | -4.45704000 |
| H | -1.69373000 | 0.42396700  | -4.38538300 |
| C | -2.95925600 | 3.99744400  | -0.62469500 |
| H | -1.99589100 | 3.83200200  | -0.13775300 |
| H | -3.28484300 | 5.01421300  | -0.39160900 |
| H | -3.67292400 | 3.31018600  | -0.15864400 |
| C | -0.13916500 | 1.21830600  | 4.42897700  |
| C | -0.94345000 | 0.29363500  | 3.72949000  |
| C | -0.30270700 | -0.83102200 | 3.15490900  |
| C | 1.08620500  | -0.96288000 | 3.29970400  |
| C | 1.83035600  | -0.02148200 | 3.97977300  |
| C | 1.23884400  | 1.09047300  | 4.55620100  |
| H | -0.61298500 | 2.07089000  | 4.89752300  |
| H | 1.58326900  | -1.82026400 | 2.85996800  |
| H | 1.83026700  | 1.82176600  | 5.09324900  |
| C | -2.46949700 | 0.51327300  | 3.89791400  |
| C | -2.86357600 | -0.28666700 | 5.19474200  |
| H | -2.06050700 | -0.99476000 | 5.41087200  |
| H | -2.94466900 | 0.36292400  | 6.06761000  |
| C | -2.79982600 | 2.01569600  | 3.93260800  |

|   |             |             |            |
|---|-------------|-------------|------------|
| C | -3.74732700 | 2.54002200  | 4.81824100 |
| C | -2.25706100 | 2.87260000  | 2.96126000 |
| C | -4.13542700 | 3.87936800  | 4.74775300 |
| H | -4.20264000 | 1.90542900  | 5.57026700 |
| C | -2.64749300 | 4.20798200  | 2.88593800 |
| H | -1.49625900 | 2.51191800  | 2.27574800 |
| C | -3.58909000 | 4.71895500  | 3.77966700 |
| H | -4.86735500 | 4.26170200  | 5.45218800 |
| H | -2.20626300 | 4.84607700  | 2.12905600 |
| H | -3.89035700 | 5.75995300  | 3.72354800 |
| C | -0.94201900 | -1.97849800 | 2.41996800 |
| H | -1.31666900 | -2.72918600 | 3.12117600 |
| H | -1.75213000 | -1.69551200 | 1.75730200 |
| H | -0.19235400 | -2.47271200 | 1.80667600 |
| O | 3.22889200  | -0.21429900 | 4.10132200 |
| S | 4.13088900  | 0.03028600  | 2.75998800 |
| O | 5.21478400  | -0.92959600 | 2.75807300 |
| O | 3.25349700  | 0.21001200  | 1.60723300 |
| C | 4.83406800  | 1.70807800  | 3.21058400 |
| F | 5.62320100  | 2.13224800  | 2.23204600 |
| F | 5.51869000  | 1.59543100  | 4.33845700 |
| F | 3.82147500  | 2.56262600  | 3.37531300 |

### SS-TS1

Sum of electronic and thermal Free Energies=-4858.912181

|   |             |             |             |
|---|-------------|-------------|-------------|
| C | 0.53809800  | -4.92618200 | -2.44002800 |
| C | -0.12165400 | -2.69140800 | -2.85077300 |
| C | -0.47622100 | -3.76939700 | -0.41981700 |
| H | 1.50193700  | -4.74545000 | -1.95328000 |
| H | 0.22130700  | -5.94218500 | -2.19391200 |
| C | 0.66154500  | -4.66379900 | -3.95602800 |
| C | -0.48453000 | -3.85315200 | -1.93931000 |
| C | -2.26841200 | -5.26185400 | -0.98070400 |
| C | 0.43138800  | -3.17246400 | -4.04829500 |
| C | -0.28154400 | -1.32204500 | -2.69519800 |
| C | -1.39364100 | -4.68881700 | 0.11078200  |
| C | 0.33186600  | -3.05110800 | 0.45493100  |
| H | 1.63265500  | -4.96261100 | -4.36076700 |
| H | -0.10109300 | -5.21481400 | -4.52054000 |
| H | -2.01613400 | -6.31150500 | -1.17476100 |
| H | -3.32911700 | -5.22927700 | -0.71428200 |
| C | 0.71923900  | -2.30414300 | -5.09646300 |
| C | -0.00976900 | -0.41711600 | -3.73250100 |
| O | -0.70725600 | -0.81560100 | -1.45941200 |

|   |             |             |             |
|---|-------------|-------------|-------------|
| C | -1.40056700 | -4.96910800 | 1.47373900  |
| C | 0.36904500  | -3.31694100 | 1.83295000  |
| O | 1.11715800  | -1.99432600 | -0.05907900 |
| H | 1.13838700  | -2.67897600 | -6.02499400 |
| C | 0.47267500  | -0.93880400 | -4.94195300 |
| P | 0.36719800  | -0.58441300 | -0.27070400 |
| H | -2.09820700 | -5.69248500 | 1.88376200  |
| C | -0.49521000 | -4.31807600 | 2.31080800  |
| H | 0.68157200  | -0.25154600 | -5.75486500 |
| O | 1.50607200  | 0.33218400  | -0.84545400 |
| O | -0.37592600 | -0.02026200 | 0.88548000  |
| H | -0.46710300 | -4.55731300 | 3.36798100  |
| H | 2.39898800  | -0.05039300 | -1.00595100 |
| C | -1.93893100 | -4.36824900 | -2.19721000 |
| H | -2.62245000 | -3.51621200 | -2.22952900 |
| H | -2.02302700 | -4.89023200 | -3.15291100 |
| C | 3.09292400  | 3.72023200  | -3.55481200 |
| C | 1.82471400  | 4.21061600  | -3.39545400 |
| C | 0.69282300  | 3.33744300  | -3.39405500 |
| C | 0.89908400  | 1.91749000  | -3.55277100 |
| C | 2.24269200  | 1.45014800  | -3.69830400 |
| C | 3.29964900  | 2.32028000  | -3.71207600 |
| C | -0.60579400 | 3.83135000  | -3.23820700 |
| C | -0.21437900 | 1.04738700  | -3.54963400 |
| C | -1.52163600 | 1.56136300  | -3.39193600 |
| C | -1.71478800 | 2.98224400  | -3.22404800 |
| C | -3.04089700 | 3.49150700  | -3.06037800 |
| H | -3.16971900 | 4.56391800  | -2.94160600 |
| C | -4.12489500 | 2.65731300  | -3.07560300 |
| C | -3.94088600 | 1.26075600  | -3.27536600 |
| C | -2.68623200 | 0.73276200  | -3.42852400 |
| H | -0.75680100 | 4.90209700  | -3.13475000 |
| H | 3.94378900  | 4.39386500  | -3.56648300 |
| H | 1.65291200  | 5.27742900  | -3.28326300 |
| H | 2.42110300  | 0.38688200  | -3.79298400 |
| H | 4.30573200  | 1.93995700  | -3.84047800 |
| H | -5.12575300 | 3.05364400  | -2.94407500 |
| H | -4.81012100 | 0.61299100  | -3.31988200 |
| H | -2.56170700 | -0.32968500 | -3.59947900 |
| C | -0.18371100 | -0.55604500 | 6.19448400  |
| C | 1.16232000  | -0.60787200 | 5.95815800  |
| C | 1.68681900  | -1.28071700 | 4.81130500  |
| C | 0.77915800  | -1.91006700 | 3.88218200  |
| C | -0.61889400 | -1.80572700 | 4.15871100  |

|   |             |             |             |
|---|-------------|-------------|-------------|
| C | -1.08299400 | -1.16888500 | 5.27883500  |
| C | 3.06112100  | -1.34179500 | 4.57679000  |
| C | 1.29367500  | -2.60203400 | 2.75824600  |
| C | 2.69215400  | -2.67437600 | 2.54891800  |
| C | 3.58532400  | -2.01594000 | 3.47305700  |
| C | 4.99611400  | -2.07846900 | 3.25079000  |
| H | 5.65007600  | -1.57235700 | 3.95571100  |
| C | 5.51239600  | -2.76599400 | 2.18876200  |
| C | 4.63935500  | -3.45312200 | 1.29891200  |
| C | 3.28300300  | -3.41149200 | 1.47447600  |
| H | 3.74060400  | -0.86741300 | 5.28007500  |
| H | -0.56934300 | -0.04687700 | 7.07147100  |
| H | 1.86399500  | -0.14329700 | 6.64477300  |
| H | -1.31760200 | -2.24203600 | 3.46350400  |
| H | -2.15181100 | -1.11709200 | 5.46351800  |
| H | 6.58272400  | -2.79932600 | 2.01927400  |
| H | 5.06057900  | -4.01111700 | 0.47031100  |
| H | 2.64127800  | -3.95989900 | 0.79672700  |
| C | -0.22511100 | 5.21001300  | -0.24860700 |
| C | -1.20654400 | 2.96242200  | 0.26187500  |
| C | -1.43733900 | 4.42710500  | 0.14221500  |
| H | 0.47500000  | 4.76996500  | -0.94512300 |
| H | -0.31984200 | 6.28920400  | -0.27227200 |
| H | -0.18762600 | 2.58804600  | 0.27404400  |
| H | -2.26263200 | 4.58161600  | -0.57300300 |
| H | -1.82227900 | 4.77584900  | 1.11313200  |
| N | -2.10464800 | 2.03325000  | 0.35244300  |
| H | -1.70067800 | 1.07870600  | 0.46614500  |
| C | -3.51689500 | 2.06329700  | 0.32381100  |
| C | -4.29174300 | 3.21314900  | 0.46184400  |
| C | -4.13301600 | 0.80668500  | 0.10465000  |
| C | -5.68015800 | 3.14036400  | 0.31251400  |
| H | -3.86653500 | 4.17508900  | 0.69752400  |
| C | -5.51435600 | 0.74879000  | -0.05042500 |
| C | -6.28619700 | 1.90857500  | 0.03721400  |
| H | -5.99150700 | -0.20872200 | -0.21654500 |
| H | -7.35917800 | 1.83333000  | -0.08357100 |
| O | -6.34011000 | 4.32029000  | 0.45297700  |
| C | -7.75960100 | 4.31049800  | 0.34615900  |
| H | -8.21314300 | 3.66809100  | 1.11009500  |
| H | -8.07768400 | 5.34051700  | 0.50392300  |
| H | -8.08366600 | 3.97904600  | -0.64775000 |
| O | -3.29877500 | -0.25717300 | 0.09570800  |
| C | -3.59536800 | -1.41189900 | -0.71262800 |

|   |             |             |             |
|---|-------------|-------------|-------------|
| H | -3.88667100 | -1.06062700 | -1.70090100 |
| H | -2.62084300 | -1.88932400 | -0.80070400 |
| C | -4.59573900 | -2.38992900 | -0.14855000 |
| C | -5.56451800 | -2.95244200 | -1.00629500 |
| C | -4.48499500 | -2.82672900 | 1.18616800  |
| C | -6.40951800 | -3.95215800 | -0.51186600 |
| C | -5.34819700 | -3.82613200 | 1.64521400  |
| C | -6.30386100 | -4.39009600 | 0.80493700  |
| H | -7.15424500 | -4.38921000 | -1.17021700 |
| H | -5.26187900 | -4.16559900 | 2.67333300  |
| H | -6.96398400 | -5.16846700 | 1.17435000  |
| C | -3.46561100 | -2.24164100 | 2.12944600  |
| H | -2.49143000 | -2.11041100 | 1.65455000  |
| H | -3.77223900 | -1.25349900 | 2.48802600  |
| H | -3.34266900 | -2.89368300 | 2.99683600  |
| C | -5.71236500 | -2.51799500 | -2.44871500 |
| H | -4.81463700 | -2.72453400 | -3.04202600 |
| H | -6.54244400 | -3.04602300 | -2.92241200 |
| H | -5.91595600 | -1.44427900 | -2.53462900 |
| C | 2.70852800  | 3.09451200  | 0.44096800  |
| C | 2.32970400  | 3.06538900  | 1.79335700  |
| C | 3.00147100  | 2.17534800  | 2.66903200  |
| C | 3.97672300  | 1.32081500  | 2.14217400  |
| C | 4.31703300  | 1.38849200  | 0.79856300  |
| C | 3.71465200  | 2.28413600  | -0.06993300 |
| H | 2.20771400  | 3.77148900  | -0.23848700 |
| H | 4.49802900  | 0.61903100  | 2.78067900  |
| H | 3.97762500  | 2.34290700  | -1.11511300 |
| C | 1.27774700  | 4.01124400  | 2.25420000  |
| C | 1.26469700  | 5.28070100  | 1.75492000  |
| H | 2.10237500  | 5.66388600  | 1.18497500  |
| H | 0.53526800  | 6.00742800  | 2.08697100  |
| C | 0.15292100  | 3.54047600  | 3.09396800  |
| C | -0.60634800 | 4.43752200  | 3.87152600  |
| C | -0.25680000 | 2.19718600  | 3.04766500  |
| C | -1.75933000 | 4.01671400  | 4.52662000  |
| H | -0.28044800 | 5.46679300  | 3.97686400  |
| C | -1.42094400 | 1.78152700  | 3.68907400  |
| H | 0.30364700  | 1.47508100  | 2.46738400  |
| C | -2.18227400 | 2.68774000  | 4.42490700  |
| H | -2.32626500 | 4.72485100  | 5.12300400  |
| H | -1.72109000 | 0.74485800  | 3.60382600  |
| H | -3.08806700 | 2.36338300  | 4.92750300  |
| C | 2.75031400  | 2.16275800  | 4.15597000  |

|   |            |             |             |
|---|------------|-------------|-------------|
| H | 3.61219500 | 1.74616000  | 4.68136200  |
| H | 2.57214000 | 3.17279200  | 4.53265400  |
| H | 1.87719400 | 1.56073100  | 4.41839000  |
| O | 5.40098100 | 0.55380800  | 0.39711500  |
| S | 5.34162000 | -0.39223100 | -0.91490800 |
| O | 6.07920500 | -1.60518100 | -0.64477900 |
| O | 3.99306700 | -0.41849400 | -1.49096100 |
| C | 6.40734300 | 0.61443000  | -2.08826900 |
| F | 6.18034100 | 0.16767500  | -3.32201200 |
| F | 7.67861700 | 0.44990500  | -1.76384600 |
| F | 6.08734400 | 1.90738200  | -2.01729900 |

### SS-III

Sum of electronic and thermal Free Energies= -4858.961725

|   |             |             |             |
|---|-------------|-------------|-------------|
| C | 0.45565500  | 3.49333900  | -2.48501100 |
| C | -0.55375600 | 4.48306500  | -3.15569500 |
| C | 0.07539100  | 2.20156300  | -3.19054200 |
| C | 0.45068600  | 3.66947100  | -0.97361300 |
| H | -1.51734200 | 4.40013800  | -2.64270800 |
| H | -0.22205100 | 5.52114000  | -3.08315700 |
| C | -0.68904200 | 3.97407100  | -4.60571700 |
| C | 2.24419900  | 5.03731800  | -1.79044600 |
| C | -0.47933800 | 2.48553500  | -4.44875000 |
| C | 0.22848000  | 0.87445500  | -2.81476900 |
| C | 1.36912000  | 4.66838700  | -0.61408500 |
| C | -0.34625100 | 3.10484700  | 0.01591200  |
| H | -1.65784600 | 4.21539300  | -5.05220000 |
| H | 0.07868100  | 4.41166800  | -5.25620600 |
| H | 1.98993500  | 6.03297100  | -2.17395600 |
| H | 3.30445200  | 5.05606000  | -1.52145400 |
| C | -0.78145900 | 1.46084100  | -5.33975300 |
| C | -0.05922000 | -0.18440900 | -3.68913200 |
| O | 0.66807400  | 0.57355300  | -1.51837700 |
| C | 1.38039500  | 5.18018100  | 0.67921900  |
| C | -0.36483700 | 3.59323900  | 1.33269200  |
| O | -1.13478800 | 1.97707500  | -0.30902200 |
| H | -1.20132200 | 1.68326000  | -6.31575200 |
| C | -0.54644600 | 0.13742800  | -4.96487500 |
| P | -0.38646700 | 0.55101200  | -0.28795600 |
| H | 2.07431400  | 5.96823500  | 0.95418100  |
| C | 0.49018900  | 4.67081200  | 1.62390800  |
| H | -0.76616000 | -0.67156800 | -5.65332200 |
| O | -1.53203200 | -0.45492300 | -0.66858200 |
| O | 0.38444500  | 0.19597000  | 0.93015300  |

|   |             |             |             |
|---|-------------|-------------|-------------|
| H | 0.47160900  | 5.08244500  | 2.62679300  |
| H | -2.41710200 | -0.11007200 | -0.92829700 |
| C | 1.91696300  | 3.93502000  | -2.82168500 |
| H | 2.58858300  | 3.08402100  | -2.68003700 |
| H | 2.01751400  | 4.26528800  | -3.85794000 |
| C | -3.18590500 | -4.23308300 | -2.92029600 |
| C | -1.92167400 | -4.70244500 | -2.68551500 |
| C | -0.78465500 | -3.84398600 | -2.80429900 |
| C | -0.98196100 | -2.45857900 | -3.15971700 |
| C | -2.32262400 | -2.00868200 | -3.37213900 |
| C | -3.38379500 | -2.86752100 | -3.27161000 |
| C | 0.51123700  | -4.32071700 | -2.58917500 |
| C | 0.13701700  | -1.60423300 | -3.28251000 |
| C | 1.44206500  | -2.10024800 | -3.06065700 |
| C | 1.62684400  | -3.48765600 | -2.70581500 |
| C | 2.95153800  | -3.98404800 | -2.49965300 |
| H | 3.07522900  | -5.03344100 | -2.24576300 |
| C | 4.04127200  | -3.16918700 | -2.63880700 |
| C | 3.86505000  | -1.80650600 | -3.00681400 |
| C | 2.61210900  | -1.29210300 | -3.21334700 |
| H | 0.65558300  | -5.36931600 | -2.34185400 |
| H | -4.04044700 | -4.89780500 | -2.84350600 |
| H | -1.75628300 | -5.74351600 | -2.42296100 |
| H | -2.49564200 | -0.96817700 | -3.61376700 |
| H | -4.38715600 | -2.50366200 | -3.45615600 |
| H | 5.04063400  | -3.55735000 | -2.47641800 |
| H | 4.73731000  | -1.17632600 | -3.14144000 |
| H | 2.49404300  | -0.25957400 | -3.51921600 |
| C | 0.35263100  | 1.59780500  | 6.07123400  |
| C | -0.99803900 | 1.57061800  | 5.85910000  |
| C | -1.56363400 | 2.03624500  | 4.63177100  |
| C | -0.69301000 | 2.52994300  | 3.59160000  |
| C | 0.71313600  | 2.50532700  | 3.84752000  |
| C | 1.21633700  | 2.07610000  | 5.04712700  |
| C | -2.94401700 | 2.02478300  | 4.42504300  |
| C | -1.25136700 | 3.02135400  | 2.38541500  |
| C | -2.65516700 | 3.03094000  | 2.20561500  |
| C | -3.51029200 | 2.50517900  | 3.24370000  |
| C | -4.92698300 | 2.50112700  | 3.05049800  |
| H | -5.55207000 | 2.09504900  | 3.84106400  |
| C | -5.48346500 | 3.00604200  | 1.90901300  |
| C | -4.64809900 | 3.56875600  | 0.90298700  |
| C | -3.28762100 | 3.58174500  | 1.04678300  |
| H | -3.59438300 | 1.64894800  | 5.21056100  |



|   |             |             |             |
|---|-------------|-------------|-------------|
| H | 0.76915200  | 1.25081000  | 7.01105100  |
| H | -1.67267000 | 1.20310600  | 6.62684000  |
| H | 1.38745500  | 2.83959000  | 3.07553900  |
| H | 2.28947700  | 2.08632400  | 5.21347100  |
| H | -6.55787500 | 2.99037800  | 1.76397000  |
| H | -5.10164200 | 3.98527200  | 0.01097700  |
| H | -2.67446600 | 4.03260800  | 0.27686300  |
| C | 0.01426600  | -5.02798500 | 0.76021600  |
| C | 1.19608800  | -2.80001100 | 0.73209400  |
| C | 1.35006300  | -4.27533800 | 0.84761700  |
| H | -0.52491100 | -4.65110000 | -0.11159600 |
| H | 0.23076200  | -6.08081200 | 0.55234800  |
| H | 0.19751900  | -2.37907200 | 0.67403600  |
| H | 2.01333300  | -4.60633000 | 0.03980500  |
| H | 1.86807700  | -4.49581700 | 1.78987900  |
| N | 2.13077700  | -1.90550200 | 0.67218800  |
| H | 1.76668000  | -0.93020100 | 0.65133300  |
| C | 3.53945400  | -1.98031200 | 0.62448800  |
| C | 4.28553000  | -3.14912100 | 0.75639600  |
| C | 4.18006800  | -0.74737100 | 0.35504600  |
| C | 5.67001200  | -3.11381900 | 0.56456200  |
| H | 3.83851900  | -4.10154600 | 0.98978900  |
| C | 5.55704000  | -0.72666000 | 0.16063400  |
| C | 6.30184700  | -1.90337000 | 0.25147000  |
| H | 6.04795100  | 0.21702700  | -0.04379200 |
| H | 7.37249100  | -1.86020700 | 0.09866300  |
| O | 6.30129300  | -4.31044000 | 0.69209700  |
| C | 7.71709400  | -4.34161500 | 0.54365300  |
| H | 8.21055500  | -3.70743500 | 1.28931300  |
| H | 8.01026800  | -5.37923800 | 0.69971400  |
| H | 8.02104900  | -4.02604800 | -0.46165500 |
| O | 3.38124600  | 0.34984300  | 0.34597000  |
| C | 3.52288500  | 1.31892900  | -0.72075600 |
| H | 3.66911400  | 0.77291500  | -1.65098700 |
| H | 2.53779800  | 1.78208800  | -0.75798300 |
| C | 4.57612200  | 2.37465400  | -0.50571100 |
| C | 5.49207100  | 2.67557100  | -1.53489500 |
| C | 4.56368000  | 3.13237700  | 0.68281800  |
| C | 6.37905800  | 3.74392200  | -1.36093600 |
| C | 5.46463500  | 4.19169700  | 0.82204100  |
| C | 6.36604800  | 4.50113400  | -0.19303300 |
| H | 7.08354800  | 3.98153700  | -2.15233700 |
| H | 5.45298000  | 4.77886000  | 1.73572200  |
| H | 7.05754500  | 5.32932400  | -0.07431900 |

|   |             |             |             |
|---|-------------|-------------|-------------|
| C | 3.60748300  | 2.81369900  | 1.80278000  |
| H | 2.61466800  | 2.55851900  | 1.42823900  |
| H | 3.94989500  | 1.95153300  | 2.38407200  |
| H | 3.51199400  | 3.66642800  | 2.47875900  |
| C | 5.54357700  | 1.88310500  | -2.82291200 |
| H | 4.61263500  | 1.95360500  | -3.39650900 |
| H | 6.34789600  | 2.24885800  | -3.46445100 |
| H | 5.72934000  | 0.81977900  | -2.63570100 |
| C | -2.76269200 | -3.08485400 | 0.82698200  |
| C | -2.22085700 | -2.78632500 | 2.10525100  |
| C | -2.85093000 | -1.74075400 | 2.85771900  |
| C | -3.85937600 | -0.98410800 | 2.25355800  |
| C | -4.31109900 | -1.29323900 | 0.97862400  |
| C | -3.80141600 | -2.36705400 | 0.26185300  |
| H | -2.35143400 | -3.89343100 | 0.23928400  |
| H | -4.33287800 | -0.17372800 | 2.79401000  |
| H | -4.16900500 | -2.62766300 | -0.71868100 |
| C | -1.11060300 | -3.58332800 | 2.59366600  |
| C | -0.89134300 | -4.96637000 | 2.02060700  |
| H | -1.84901100 | -5.42935100 | 1.76625000  |
| H | -0.43937900 | -5.60567900 | 2.78277100  |
| C | -0.06862100 | -3.05637900 | 3.46618300  |
| C | 0.69615800  | -3.89908800 | 4.31155000  |
| C | 0.30956900  | -1.69355200 | 3.40070100  |
| C | 1.78125200  | -3.40984000 | 5.02888700  |
| H | 0.42031800  | -4.94071700 | 4.43050100  |
| C | 1.41250600  | -1.21705800 | 4.09610900  |
| H | -0.21859700 | -1.01966500 | 2.73881100  |
| C | 2.15697100  | -2.06778600 | 4.91584900  |
| H | 2.33686700  | -4.07807800 | 5.67953500  |
| H | 1.68914800  | -0.17652500 | 3.98221200  |
| H | 3.01710800  | -1.69251100 | 5.46100900  |
| C | -2.56824900 | -1.48503000 | 4.31824600  |
| H | -3.46165000 | -1.07909900 | 4.79841400  |
| H | -2.28862500 | -2.40653700 | 4.83250300  |
| H | -1.75807000 | -0.77000500 | 4.47452100  |
| O | -5.41152100 | -0.52875700 | 0.49578000  |
| S | -5.34716600 | 0.25687600  | -0.92156800 |
| O | -6.05142000 | 1.51276100  | -0.79378400 |
| O | -4.00350700 | 0.17650300  | -1.50543900 |
| C | -6.45220500 | -0.85077400 | -1.96220100 |
| F | -6.20065400 | -0.57999200 | -3.24135100 |
| F | -7.71587000 | -0.58981900 | -1.67381200 |
| F | -6.19176000 | -2.13656700 | -1.72074300 |

**SS-TS2***B3LYP-D3/6-31G(d,p):*

Sum of electronic and thermal Free Energies = -4858.9471

*SMD//M062X/6-31+G(d,p):*

Sum of electronic and thermal Free Energies = -4856.906278

|   |             |             |             |
|---|-------------|-------------|-------------|
| C | -3.46281200 | 2.30641900  | 2.07118100  |
| C | -4.90891700 | 1.73097200  | 2.22476700  |
| C | -3.35933000 | 2.39039900  | 0.56089300  |
| C | -2.47844800 | 1.54477700  | 2.94305200  |
| H | -4.87019200 | 0.64479700  | 2.10019600  |
| H | -5.33583900 | 1.94366000  | 3.20742000  |
| C | -5.70104900 | 2.35874400  | 1.05792000  |
| C | -3.16498900 | 3.45327000  | 4.22018600  |
| C | -4.63598600 | 2.54547500  | 0.00234400  |
| C | -2.25219300 | 2.36973100  | -0.27355100 |
| C | -2.40951500 | 2.14427600  | 4.21089000  |
| C | -1.75212500 | 0.38252400  | 2.71366700  |
| H | -6.51629500 | 1.71698100  | 0.71006000  |
| H | -6.14974500 | 3.31821500  | 1.34384100  |
| H | -4.12093200 | 3.34902700  | 4.74840900  |
| H | -2.61159400 | 4.25176800  | 4.72348500  |
| C | -4.78355300 | 2.80085600  | -1.35634800 |
| C | -2.36422100 | 2.58630500  | -1.65916500 |
| O | -0.99512300 | 2.06706800  | 0.28346900  |
| C | -1.70182100 | 1.54213100  | 5.24529400  |
| C | -1.06184700 | -0.27351800 | 3.74231000  |
| O | -1.66936600 | -0.14350000 | 1.40733700  |
| H | -5.76784100 | 2.95037800  | -1.78932200 |
| C | -3.64952000 | 2.85213300  | -2.16449600 |
| P | -0.56342900 | 0.51680900  | 0.42473100  |
| H | -1.65405400 | 2.00475800  | 6.22618300  |
| C | -1.06395300 | 0.32534500  | 5.01313500  |
| H | -3.75052900 | 3.06088400  | -3.22361100 |
| O | -0.86743000 | -0.20801400 | -0.94361000 |
| O | 0.86171700  | 0.41334500  | 0.81421900  |
| H | -0.53973800 | -0.17737100 | 5.81836700  |
| H | -1.82042600 | -0.38818500 | -1.09923300 |
| C | -3.37997800 | 3.72619700  | 2.71806400  |
| H | -2.50922200 | 4.24659700  | 2.30532000  |
| H | -4.26446600 | 4.33015600  | 2.50354800  |
| C | -1.36521300 | -0.12849800 | -5.96372500 |
| C | -0.26388000 | 0.65735200  | -5.75482500 |

|   |             |             |             |
|---|-------------|-------------|-------------|
| C | -0.17566700 | 1.52566100  | -4.62247900 |
| C | -1.27465000 | 1.58718900  | -3.68713500 |
| C | -2.38703400 | 0.71781500  | -3.92760900 |
| C | -2.43760800 | -0.09523100 | -5.03026600 |
| C | 0.96210500  | 2.30600700  | -4.40057100 |
| C | -1.20496200 | 2.48247900  | -2.58694300 |
| C | -0.05334300 | 3.28144300  | -2.39303900 |
| C | 1.06310100  | 3.15884900  | -3.30142400 |
| C | 2.23889600  | 3.94030500  | -3.07850000 |
| H | 3.07104500  | 3.82523700  | -3.76718700 |
| C | 2.30485500  | 4.82306500  | -2.03747900 |
| C | 1.18937700  | 4.98564900  | -1.16928400 |
| C | 0.05247300  | 4.24697000  | -1.34404900 |
| H | 1.78491200  | 2.25979400  | -5.10964600 |
| H | -1.42623100 | -0.77128300 | -6.83593300 |
| H | 0.56424900  | 0.64552300  | -6.45801600 |
| H | -3.20632900 | 0.70178000  | -3.22218500 |
| H | -3.30839500 | -0.72304600 | -5.19438400 |
| H | 3.19672400  | 5.41783000  | -1.87372800 |
| H | 1.24843300  | 5.70083800  | -0.35885300 |
| H | -0.78912400 | 4.39904600  | -0.68156700 |
| C | 3.70060600  | -2.06569000 | 4.59112000  |
| C | 2.93836200  | -3.16975100 | 4.32081800  |
| C | 1.56761400  | -3.04364100 | 3.93473900  |
| C | 0.97601500  | -1.72916400 | 3.86235000  |
| C | 1.82393400  | -0.60153400 | 4.10392400  |
| C | 3.13807300  | -0.76338700 | 4.45811200  |
| C | 0.78424000  | -4.16329400 | 3.64704000  |
| C | -0.39952800 | -1.59507100 | 3.56752500  |
| C | -1.17972800 | -2.73706000 | 3.26284200  |
| C | -0.56492500 | -4.04300800 | 3.30039900  |
| C | -1.35821400 | -5.19610500 | 3.01179100  |
| H | -0.87981300 | -6.17055500 | 3.04961200  |
| C | -2.68847400 | -5.08174900 | 2.70823500  |
| C | -3.30256800 | -3.79754500 | 2.68095900  |
| C | -2.57547500 | -2.66898900 | 2.95505800  |
| H | 1.23009800  | -5.15263400 | 3.70548000  |
| H | 4.73726400  | -2.17524500 | 4.89334800  |
| H | 3.36112400  | -4.16731600 | 4.39406200  |
| H | 1.40637000  | 0.39128700  | 4.00023600  |
| H | 3.75872900  | 0.10830200  | 4.64208800  |
| H | -3.28090400 | -5.96610200 | 2.49666900  |
| H | -4.35605800 | -3.70796800 | 2.43968600  |
| H | -3.07101800 | -1.70768600 | 2.94286800  |

|   |             |             |             |
|---|-------------|-------------|-------------|
| C | 2.02387900  | -2.14399400 | -4.70206700 |
| C | 1.92220300  | -0.73124200 | -2.65864700 |
| C | 2.50714600  | -0.84658400 | -4.05391000 |
| H | 0.99278500  | -2.03057800 | -5.04329600 |
| H | 2.61579400  | -2.38565100 | -5.58936100 |
| H | 0.86779100  | -0.47900000 | -2.63631200 |
| H | 2.16890400  | 0.02334400  | -4.62064900 |
| H | 3.59474900  | -0.80380500 | -4.03752500 |
| N | 2.57559600  | -0.00167800 | -1.68910400 |
| H | 1.98544900  | 0.46039000  | -0.99101900 |
| C | 3.89919200  | -0.03471700 | -1.30909300 |
| C | 4.84346200  | -0.92210700 | -1.84145800 |
| C | 4.27259800  | 0.81822500  | -0.21341100 |
| C | 6.09174700  | -1.06523200 | -1.25393400 |
| H | 4.59326100  | -1.60352900 | -2.63524800 |
| C | 5.53556300  | 0.66034900  | 0.35623100  |
| C | 6.43738400  | -0.27467000 | -0.14102600 |
| H | 5.83861400  | 1.27635100  | 1.19055900  |
| H | 7.40776600  | -0.36984200 | 0.32835100  |
| O | 6.89323200  | -2.00909700 | -1.80498000 |
| C | 8.12041100  | -2.31880200 | -1.15229300 |
| H | 7.94603400  | -2.64883700 | -0.12145100 |
| H | 8.56460800  | -3.13243000 | -1.72477600 |
| H | 8.80425400  | -1.46246800 | -1.15361300 |
| O | 3.35642600  | 1.73529000  | 0.15160900  |
| C | 3.28987100  | 2.19707100  | 1.53359300  |
| H | 2.53024200  | 1.57695000  | 2.00354600  |
| H | 4.24629600  | 2.00466400  | 2.02377000  |
| C | 2.96072100  | 3.66611000  | 1.60476500  |
| C | 3.83845700  | 4.61156200  | 1.03098100  |
| C | 1.82881000  | 4.09756000  | 2.32520200  |
| C | 3.56989300  | 5.97376500  | 1.18416400  |
| C | 1.59027700  | 5.47166400  | 2.45440700  |
| C | 2.45257100  | 6.40721700  | 1.89411500  |
| H | 4.24936900  | 6.69915300  | 0.74649900  |
| H | 0.71896300  | 5.80355800  | 3.01123600  |
| H | 2.25779500  | 7.46885500  | 2.00993000  |
| C | 0.88370900  | 3.13775100  | 3.00699600  |
| H | -0.03235500 | 3.64917700  | 3.30737900  |
| H | 0.60372700  | 2.30684100  | 2.36194000  |
| H | 1.32632400  | 2.71744100  | 3.91823400  |
| C | 5.05940400  | 4.19128800  | 0.25124200  |
| H | 4.78266500  | 3.66354500  | -0.66537700 |
| H | 5.65987400  | 5.06160400  | -0.02245100 |

|   |             |             |             |
|---|-------------|-------------|-------------|
| H | 5.70354500  | 3.52109700  | 0.82985300  |
| C | -0.69279300 | -2.44055600 | -2.83498200 |
| C | 0.26312800  | -2.96488000 | -1.93888800 |
| C | -0.22265300 | -3.69377300 | -0.81388300 |
| C | -1.59426700 | -3.64445300 | -0.51992900 |
| C | -2.47435900 | -3.02161800 | -1.38334300 |
| C | -2.05629100 | -2.48347100 | -2.59000000 |
| H | -0.37674000 | -1.92902800 | -3.73202600 |
| H | -1.97252300 | -4.12522900 | 0.37360200  |
| H | -2.75970600 | -2.04655800 | -3.28308900 |
| C | 1.72534700  | -2.77797600 | -2.24964900 |
| C | 2.15403300  | -3.25495700 | -3.64487000 |
| H | 1.57915200  | -4.14030300 | -3.93292800 |
| H | 3.20482000  | -3.54844900 | -3.61436500 |
| C | 2.67837300  | -2.98455200 | -1.13140400 |
| C | 3.79462300  | -3.84173800 | -1.21304600 |
| C | 2.48876300  | -2.26774500 | 0.06792200  |
| C | 4.68700400  | -3.95749600 | -0.15202900 |
| H | 3.95886300  | -4.44833700 | -2.09527400 |
| C | 3.40305200  | -2.34849600 | 1.10611800  |
| H | 1.63604400  | -1.61011500 | 0.17497100  |
| C | 4.51173800  | -3.19171800 | 1.00205100  |
| H | 5.52721700  | -4.63932900 | -0.23439200 |
| H | 3.25206200  | -1.74465500 | 1.99012100  |
| H | 5.21705600  | -3.26201400 | 1.82368300  |
| C | 0.59784800  | -4.61384200 | 0.06275500  |
| H | -0.04977600 | -5.40848700 | 0.43853500  |
| H | 1.42117200  | -5.07101100 | -0.48480800 |
| H | 1.02380600  | -4.10580900 | 0.92913800  |
| O | -3.85166600 | -2.97938700 | -1.02796300 |
| S | -4.47147900 | -1.53601500 | -0.58067600 |
| O | -5.07649500 | -1.64350800 | 0.73256100  |
| O | -3.54360900 | -0.45510200 | -0.91440600 |
| C | -5.83251600 | -1.40098900 | -1.85238000 |
| F | -5.27839800 | -1.34823700 | -3.06546700 |
| F | -6.49032200 | -0.27069400 | -1.61029400 |
| F | -6.64598800 | -2.44042200 | -1.76547400 |

#### SS-IV

Sum of electronic and thermal Free Energies = -4858.958892

|   |            |            |            |
|---|------------|------------|------------|
| C | 0.24434900 | 4.11369500 | 1.57519900 |
| C | 1.34453300 | 5.05757600 | 2.16248700 |
| C | 0.20297700 | 3.04761500 | 2.66505800 |
| C | 0.51605900 | 3.80919200 | 0.11138100 |

|   |             |             |             |
|---|-------------|-------------|-------------|
| H | 2.32740500  | 4.64078400  | 1.91992000  |
| H | 1.28949800  | 6.06437200  | 1.74174000  |
| C | 1.11737600  | 5.00862700  | 3.68872400  |
| C | -1.02406500 | 5.63898400  | 0.09948700  |
| C | 0.59100200  | 3.60579800  | 3.89551600  |
| C | -0.15620800 | 1.70694100  | 2.63944900  |
| C | -0.09825600 | 4.76165300  | -0.71344300 |
| C | 1.35218700  | 2.86628500  | -0.46791400 |
| H | 2.03047400  | 5.19900700  | 4.25985000  |
| H | 0.38151200  | 5.75760700  | 4.00744900  |
| H | -0.60211700 | 6.64503800  | 0.21445900  |
| H | -2.00530800 | 5.75391000  | -0.36902100 |
| C | 0.50551700  | 2.86964100  | 5.07281100  |
| C | -0.29176900 | 0.94646700  | 3.81092600  |
| O | -0.38851000 | 1.06023400  | 1.42191600  |
| C | 0.20119600  | 4.81077100  | -2.07308600 |
| C | 1.73977900  | 2.93154800  | -1.81256500 |
| O | 1.82778700  | 1.81463000  | 0.32271500  |
| H | 0.80446400  | 3.30820600  | 6.01975600  |
| C | 0.03205500  | 1.55515500  | 5.02943700  |
| P | 0.84121500  | 0.54103500  | 0.50257600  |
| H | -0.27679300 | 5.54450100  | -2.71423400 |
| C | 1.14520000  | 3.92569900  | -2.60350500 |
| H | -0.06805300 | 0.97900800  | 5.94335300  |
| O | 1.72553900  | -0.32543700 | 1.48800100  |
| O | 0.26152700  | -0.06485300 | -0.71561200 |
| H | 1.43246900  | 3.99657500  | -3.64743300 |
| H | 2.62569900  | -0.47636000 | 1.12223600  |
| C | -1.10045300 | 4.90618200  | 1.45998200  |
| H | -1.93343100 | 4.20028300  | 1.45576600  |
| H | -1.25139900 | 5.58150000  | 2.30517100  |
| C | 1.73230300  | -3.80879600 | 4.26471700  |
| C | 0.40628600  | -4.00378100 | 3.98919800  |
| C | -0.47949600 | -2.89440200 | 3.82167300  |
| C | 0.04647600  | -1.55274200 | 3.93355700  |
| C | 1.43793700  | -1.39887500 | 4.22637100  |
| C | 2.25071900  | -2.48751000 | 4.39134700  |
| C | -1.83746800 | -3.08186500 | 3.54652800  |
| C | -0.81043200 | -0.45107000 | 3.73186300  |
| C | -2.18055700 | -0.65570800 | 3.44212300  |
| C | -2.70246500 | -1.99904700 | 3.36128900  |
| C | -4.09376900 | -2.18863100 | 3.09496700  |
| H | -4.47917000 | -3.20334900 | 3.06275900  |
| C | -4.92969900 | -1.12384800 | 2.89831000  |

|   |             |             |             |
|---|-------------|-------------|-------------|
| C | -4.41987300 | 0.20228600  | 2.98044900  |
| C | -3.09468800 | 0.42663900  | 3.25158100  |
| H | -2.23075900 | -4.09360700 | 3.48811900  |
| H | 2.39420800  | -4.65899100 | 4.39447600  |
| H | -0.00046400 | -5.00710100 | 3.90056700  |
| H | 1.84304100  | -0.39777400 | 4.29905000  |
| H | 3.30350300  | -2.34779100 | 4.61094400  |
| H | -5.98261400 | -1.28393300 | 2.69216400  |
| H | -5.09654700 | 1.04188600  | 2.85541200  |
| H | -2.72384300 | 1.44020900  | 3.34618200  |
| C | 2.26336100  | -1.05479500 | -5.13234400 |
| C | 3.51044400  | -0.83266300 | -4.61573800 |
| C | 3.73534200  | 0.20289900  | -3.65764200 |
| C | 2.62303400  | 1.01668400  | -3.22396600 |
| C | 1.33272800  | 0.72466000  | -3.76412300 |
| C | 1.16264300  | -0.26549300 | -4.69553000 |
| C | 5.00992800  | 0.44727200  | -3.14488000 |
| C | 2.84593800  | 2.05614200  | -2.29813300 |
| C | 4.14750400  | 2.30373100  | -1.79595300 |
| C | 5.24418500  | 1.47367600  | -2.22656800 |
| C | 6.55022200  | 1.70915700  | -1.70088500 |
| H | 7.35703800  | 1.06027200  | -2.02478300 |
| C | 6.77703900  | 2.71621100  | -0.80266300 |
| C | 5.70440600  | 3.55520700  | -0.39365600 |
| C | 4.43675400  | 3.35905100  | -0.87537700 |
| H | 5.83973600  | -0.17747900 | -3.46132200 |
| H | 2.10598000  | -1.83118200 | -5.87398200 |
| H | 4.36081500  | -1.42677100 | -4.93869800 |
| H | 0.48732500  | 1.30578600  | -3.42247700 |
| H | 0.17871600  | -0.46140200 | -5.10591300 |
| H | 7.77359500  | 2.88526000  | -0.40772100 |
| H | 5.89640900  | 4.36516000  | 0.30330100  |
| H | 3.63826500  | 4.02108400  | -0.56418500 |
| C | -2.00131300 | -5.55169600 | 0.27384700  |
| C | -2.06918200 | -3.20892300 | 0.04236300  |
| C | -2.99400100 | -4.39112600 | 0.33856900  |
| H | -1.31016800 | -5.50789300 | 1.12377500  |
| H | -2.48793200 | -6.52951500 | 0.29190100  |
| H | -1.44359700 | -3.10519000 | 0.92732700  |
| H | -3.51952700 | -4.28458100 | 1.28815500  |
| H | -3.72720400 | -4.54400800 | -0.45332700 |
| N | -2.61664200 | -1.86489600 | -0.13124500 |
| H | -1.90678300 | -1.13080500 | -0.10271300 |
| C | -3.86361600 | -1.41553900 | -0.35018800 |



|   |             |             |             |
|---|-------------|-------------|-------------|
| C | -5.01856700 | -2.20631800 | -0.50626800 |
| C | -4.02803000 | 0.03458800  | -0.38123600 |
| C | -6.26682900 | -1.62695900 | -0.64411200 |
| H | -4.97172300 | -3.27871800 | -0.51404700 |
| C | -5.30234100 | 0.59709000  | -0.51389300 |
| C | -6.41573300 | -0.21128900 | -0.64234400 |
| H | -5.40506000 | 1.67121400  | -0.55714800 |
| H | -7.39073300 | 0.24307100  | -0.75877700 |
| O | -7.30037500 | -2.48248000 | -0.77551800 |
| C | -8.62218300 | -1.96733700 | -0.94571200 |
| H | -8.69864900 | -1.36368100 | -1.85618900 |
| H | -9.26626000 | -2.84084000 | -1.03534900 |
| H | -8.93260500 | -1.37479200 | -0.07839500 |
| O | -2.89805000 | 0.72303200  | -0.28292600 |
| C | -2.89324300 | 2.11496300  | 0.15074900  |
| H | -3.39975300 | 2.13578300  | 1.11391300  |
| H | -1.83362800 | 2.28460700  | 0.31423300  |
| C | -3.44779000 | 3.13168700  | -0.81015400 |
| C | -4.39239800 | 4.07773000  | -0.35665900 |
| C | -2.92860700 | 3.20390700  | -2.11712300 |
| C | -4.80578600 | 5.08816900  | -1.23185700 |
| C | -3.36675900 | 4.22702000  | -2.96232500 |
| C | -4.29662200 | 5.16617700  | -2.52549400 |
| H | -5.52970400 | 5.82137300  | -0.88968700 |
| H | -2.96609600 | 4.28651100  | -3.96978000 |
| H | -4.62440600 | 5.95858700  | -3.19085400 |
| C | -1.93214400 | 2.19238300  | -2.61413500 |
| H | -1.13037200 | 2.00639900  | -1.89577900 |
| H | -2.41302300 | 1.22812800  | -2.79320000 |
| H | -1.47983700 | 2.52992700  | -3.54846300 |
| C | -4.95973700 | 4.04934600  | 1.04643600  |
| H | -4.19413900 | 4.23658400  | 1.80722000  |
| H | -5.72545700 | 4.81891100  | 1.16211100  |
| H | -5.42409900 | 3.08659300  | 1.28917600  |
| C | 0.87914100  | -3.19065100 | 0.23625800  |
| C | 0.32721700  | -3.36490200 | -1.03908800 |
| C | 1.21450600  | -3.44621900 | -2.14371200 |
| C | 2.58110000  | -3.22727900 | -1.93227300 |
| C | 3.07302500  | -3.04344900 | -0.65110800 |
| C | 2.24560600  | -3.05993900 | 0.45432400  |
| H | 0.26161900  | -3.17538700 | 1.12241400  |
| H | 3.27008300  | -3.24199700 | -2.76835200 |
| H | 2.63274500  | -2.96655200 | 1.45976000  |
| C | -1.16741700 | -3.70894100 | -1.18195700 |

|   |             |             |             |
|---|-------------|-------------|-------------|
| C | -1.25722900 | -5.27831300 | -1.04323000 |
| H | -0.26066200 | -5.71981800 | -1.05470200 |
| H | -1.80444000 | -5.71402900 | -1.88015200 |
| C | -1.84560400 | -3.12745100 | -2.42714600 |
| C | -2.91541600 | -3.77373500 | -3.05762400 |
| C | -1.50703400 | -1.83557400 | -2.85977100 |
| C | -3.61708800 | -3.16646700 | -4.10129300 |
| H | -3.22233900 | -4.76577400 | -2.74877100 |
| C | -2.20213700 | -1.23492000 | -3.90763300 |
| H | -0.69547700 | -1.29877300 | -2.37936000 |
| C | -3.26138100 | -1.89280400 | -4.53431900 |
| H | -4.43799300 | -3.69712000 | -4.57325000 |
| H | -1.91169500 | -0.24498900 | -4.24008100 |
| H | -3.79711700 | -1.41892700 | -5.35057000 |
| C | 0.79743600  | -3.82872700 | -3.54538400 |
| H | 1.66044100  | -4.21459100 | -4.09243400 |
| H | 0.02445000  | -4.59943600 | -3.54670300 |
| H | 0.40243800  | -2.97674900 | -4.10104800 |
| O | 4.48131900  | -2.95035800 | -0.49482400 |
| S | 5.15586800  | -1.53732900 | -0.04985000 |
| O | 6.32720700  | -1.32020300 | -0.86968700 |
| O | 4.12788600  | -0.51356200 | 0.14911000  |
| C | 5.76265000  | -2.01527400 | 1.65189200  |
| F | 6.48277100  | -1.00712400 | 2.12805200  |
| F | 6.49598600  | -3.11533800 | 1.57919900  |
| F | 4.70703700  | -2.22453000 | 2.44934500  |

### SR-TS1

Sum of electronic and thermal Free Energies = -4858.916863

|   |             |             |             |
|---|-------------|-------------|-------------|
| C | -0.74026100 | -0.65998800 | -4.09332400 |
| C | 0.21130700  | -1.00240900 | -5.28611300 |
| C | -0.23611500 | 0.73349600  | -3.73422600 |
| C | -0.80033400 | -1.82604800 | -3.12126100 |
| H | 1.16665300  | -1.35413500 | -4.88325300 |
| H | -0.19659300 | -1.78993000 | -5.92339000 |
| C | 0.41286300  | 0.34189400  | -6.01067300 |
| C | -2.65963400 | -2.11394400 | -4.60701200 |
| C | 0.31945700  | 1.33519900  | -4.87649700 |
| C | -0.27035400 | 1.46017300  | -2.54697000 |
| C | -1.80655300 | -2.71940100 | -3.51742900 |
| C | 0.01111200  | -2.15958900 | -2.04514600 |
| H | 1.36825000  | 0.40322300  | -6.53951500 |
| H | -0.37446400 | 0.51803800  | -6.75416700 |
| H | -2.46033300 | -2.59347700 | -5.57327700 |

|   |             |             |             |
|---|-------------|-------------|-------------|
| H | -3.72772900 | -2.22850000 | -4.40229700 |
| C | 0.73268700  | 2.66186600  | -4.85668900 |
| C | 0.14897300  | 2.80017700  | -2.49032800 |
| O | -0.70551200 | 0.83261400  | -1.36387900 |
| C | -1.90433000 | -3.97289700 | -2.92258500 |
| C | -0.06851700 | -3.40657500 | -1.40378300 |
| O | 0.91665400  | -1.18727700 | -1.56793600 |
| H | 1.14944700  | 3.12510200  | -5.74550100 |
| C | 0.62182600  | 3.38906600  | -3.67389500 |
| P | 0.33104100  | -0.10277200 | -0.52946400 |
| H | -2.66263100 | -4.67861100 | -3.24656400 |
| C | -1.01923000 | -4.31613600 | -1.90075800 |
| H | 0.94021600  | 4.42539900  | -3.63955000 |
| O | 1.59575500  | 0.79226800  | -0.24389900 |
| O | -0.38785100 | -0.63420800 | 0.65275100  |
| H | -1.07440300 | -5.29820600 | -1.44429100 |
| H | 2.44880300  | 0.54144900  | -0.66227200 |
| C | -2.21690200 | -0.63472500 | -4.60498300 |
| H | -2.82885300 | -0.07135800 | -3.89947100 |
| H | -2.30503300 | -0.15340900 | -5.58137400 |
| C | 3.82322500  | 4.92034900  | 0.45712400  |
| C | 2.64064700  | 5.34117100  | 1.00193000  |
| C | 1.38906600  | 4.93546200  | 0.44330400  |
| C | 1.37915400  | 4.04177100  | -0.69234800 |
| C | 2.63984200  | 3.61536600  | -1.21562800 |
| C | 3.81731000  | 4.05336400  | -0.67226700 |
| C | 0.17733500  | 5.39321200  | 0.96972800  |
| C | 0.14568400  | 3.62411600  | -1.24489300 |
| C | -1.07011600 | 4.08284100  | -0.69066900 |
| C | -1.04817000 | 4.99445600  | 0.43090500  |
| C | -2.28798300 | 5.45330300  | 0.97932500  |
| H | -2.25583600 | 6.14121800  | 1.81934900  |
| C | -3.48616100 | 5.03742000  | 0.46160300  |
| C | -3.51052100 | 4.14765600  | -0.65059100 |
| C | -2.34515700 | 3.69576000  | -1.21081900 |
| H | 0.18976900  | 6.08095700  | 1.81135600  |
| H | 4.76839500  | 5.24808200  | 0.87781800  |
| H | 2.63027200  | 6.00896600  | 1.85840600  |
| H | 2.65605600  | 2.93429000  | -2.05609000 |
| H | 4.75718600  | 3.73622700  | -1.10555100 |
| H | -4.42181700 | 5.38010600  | 0.89147700  |
| H | -4.46467800 | 3.83383300  | -1.05900200 |
| H | -2.37612800 | 3.03930600  | -2.07059500 |
| C | -0.89167300 | -5.09437800 | 3.43444500  |

|   |             |             |             |
|---|-------------|-------------|-------------|
| C | 0.46664700  | -5.06138400 | 3.27944400  |
| C | 1.06143500  | -4.61981500 | 2.05727100  |
| C | 0.21476000  | -4.18506100 | 0.97162100  |
| C | -1.19673300 | -4.20014400 | 1.19832600  |
| C | -1.73152100 | -4.65537900 | 2.37419000  |
| C | 2.44789700  | -4.61718700 | 1.89146500  |
| C | 0.80137400  | -3.78240100 | -0.25439600 |
| C | 2.20693300  | -3.81030900 | -0.41258600 |
| C | 3.04043900  | -4.22496200 | 0.69105400  |
| C | 4.46052200  | -4.25070000 | 0.52571300  |
| H | 5.06984200  | -4.56810900 | 1.36778000  |
| C | 5.03842500  | -3.90207000 | -0.66285400 |
| C | 4.21871100  | -3.53319700 | -1.76711000 |
| C | 2.85656100  | -3.49055000 | -1.64637800 |
| H | 3.07947800  | -4.94978700 | 2.71078900  |
| H | -1.33105000 | -5.44143500 | 4.36370600  |
| H | 1.12413500  | -5.38437300 | 4.08137600  |
| H | -1.85594000 | -3.84723000 | 0.42145200  |
| H | -2.80931700 | -4.66176000 | 2.50522600  |
| H | 6.11649600  | -3.91438900 | -0.77883400 |
| H | 4.68632700  | -3.28077100 | -2.71143500 |
| H | 2.25340600  | -3.22836900 | -2.50617300 |
| C | -0.33379300 | 2.68290900  | 3.62376200  |
| C | -1.65314300 | 2.14419900  | 1.83351300  |
| C | -0.22265500 | 2.14497400  | 2.22444600  |
| H | -0.94524900 | 2.12249100  | 4.32130600  |
| H | -0.28103800 | 3.75707300  | 3.77189200  |
| H | -2.16954000 | 3.09164700  | 1.74632100  |
| H | 0.19540000  | 1.14183600  | 2.18975200  |
| H | 0.35961300  | 2.80439300  | 1.58290400  |
| N | -2.36908300 | 1.05564100  | 1.74664200  |
| H | -1.86954800 | 0.16004000  | 1.65286400  |
| C | -3.78075000 | 1.00130400  | 1.66001000  |
| C | -4.57263800 | 2.10111000  | 1.97903200  |
| C | -4.36434300 | -0.21119000 | 1.25137800  |
| C | -5.96078900 | 2.02136200  | 1.84022000  |
| H | -4.14951800 | 3.02997000  | 2.33707000  |
| C | -5.75102800 | -0.29013600 | 1.15918600  |
| C | -6.55370400 | 0.81528700  | 1.43831600  |
| H | -6.19579300 | -1.22495500 | 0.84185700  |
| H | -7.62816500 | 0.72636000  | 1.34584800  |
| O | -6.63819400 | 3.16157800  | 2.13338000  |
| C | -8.06022400 | 3.13798600  | 2.05005000  |
| H | -8.48784700 | 2.40558800  | 2.74428100  |

|   |             |             |             |
|---|-------------|-------------|-------------|
| H | -8.39158600 | 4.13765300  | 2.32925000  |
| H | -8.39639000 | 2.91425100  | 1.03083800  |
| O | -3.55721100 | -1.27811400 | 0.95074100  |
| C | -3.21901500 | -1.37730800 | -0.47263400 |
| H | -2.65146500 | -0.49179900 | -0.74803300 |
| H | -2.54283100 | -2.22592000 | -0.51985800 |
| C | -4.41173000 | -1.57221200 | -1.36806000 |
| C | -4.91079200 | -0.50492300 | -2.14192900 |
| C | -5.02998700 | -2.83949000 | -1.42345300 |
| C | -5.97465300 | -0.74301900 | -3.02046800 |
| C | -6.09722100 | -3.03967300 | -2.30238500 |
| C | -6.55871200 | -2.00256200 | -3.11095400 |
| H | -6.35207400 | 0.07363900  | -3.62885700 |
| H | -6.57097500 | -4.01581700 | -2.34930800 |
| H | -7.38233500 | -2.17284400 | -3.79732500 |
| C | -4.57030900 | -3.97034900 | -0.53509400 |
| H | -3.60964300 | -4.37406400 | -0.86929700 |
| H | -4.44157400 | -3.63577400 | 0.49772200  |
| H | -5.29287100 | -4.78939100 | -0.54530900 |
| C | -4.37730700 | 0.90294900  | -2.01158100 |
| H | -4.72873700 | 1.36476600  | -1.08316700 |
| H | -3.28735100 | 0.94724300  | -1.98966400 |
| H | -4.72243300 | 1.52339100  | -2.84273400 |
| C | 3.06172600  | 1.39775000  | 2.56789400  |
| C | 2.62139300  | 0.36888900  | 3.42172600  |
| C | 3.19370800  | -0.92237000 | 3.28253300  |
| C | 4.12449700  | -1.13700400 | 2.25956700  |
| C | 4.52267900  | -0.09165500 | 1.44114300  |
| C | 4.02761100  | 1.19510100  | 1.59371700  |
| H | 2.62476500  | 2.38517300  | 2.65051100  |
| H | 4.56332700  | -2.11514500 | 2.10907400  |
| H | 4.33779600  | 2.01126500  | 0.95870600  |
| C | 1.60723200  | 0.68890000  | 4.45228700  |
| C | 1.54386800  | 1.95015300  | 4.98132100  |
| H | 2.32790600  | 2.67615900  | 4.80097900  |
| H | 0.85211400  | 2.18146300  | 5.78066500  |
| C | 0.49726300  | -0.24221400 | 4.75198600  |
| C | -0.10118500 | -0.28042300 | 6.02342600  |
| C | -0.09013500 | -0.98266400 | 3.71182600  |
| C | -1.26907600 | -1.00879900 | 6.23708200  |
| H | 0.36087200  | 0.25193600  | 6.84876200  |
| C | -1.28006800 | -1.67539000 | 3.91671000  |
| H | 0.35716900  | -0.99054300 | 2.72591100  |
| C | -1.87354100 | -1.69213800 | 5.17973900  |

|   |             |             |             |
|---|-------------|-------------|-------------|
| H | -1.71041800 | -1.03731500 | 7.22840500  |
| H | -1.73489800 | -2.19892500 | 3.08519500  |
| H | -2.79530400 | -2.24195400 | 5.34210200  |
| C | 2.88961800  | -2.06422100 | 4.22139600  |
| H | 3.71353100  | -2.78125000 | 4.21554600  |
| H | 2.74801800  | -1.71288000 | 5.24540300  |
| H | 1.98037900  | -2.59664900 | 3.93253000  |
| O | 5.53968100  | -0.40055000 | 0.49514500  |
| S | 5.39283800  | -0.02790500 | -1.07636400 |
| O | 5.97791400  | -1.09025100 | -1.86286700 |
| O | 4.06139700  | 0.51250100  | -1.36662800 |
| C | 6.59973900  | 1.40790500  | -1.16391500 |
| F | 6.34329200  | 2.08458100  | -2.28196700 |
| F | 7.83358300  | 0.93370400  | -1.18394900 |
| F | 6.44195600  | 2.21117600  | -0.11049200 |

### SR-III

Sum of electronic and thermal Free Energies = -4858.95422

|   |             |            |             |
|---|-------------|------------|-------------|
| C | 0.41713900  | 4.07517900 | -1.05457000 |
| C | -0.62963300 | 5.23738100 | -1.09671800 |
| C | -0.13799700 | 3.17589900 | -2.15118900 |
| C | 0.66231700  | 3.63815200 | 0.38299600  |
| H | -1.51220600 | 4.93384500 | -0.52434500 |
| H | -0.24150800 | 6.15741300 | -0.65480200 |
| C | -0.99459500 | 5.37073000 | -2.58852300 |
| C | 2.35322100  | 5.26391800 | -0.11484500 |
| C | -0.84563700 | 3.95145600 | -3.08456300 |
| C | -0.02656300 | 1.80786900 | -2.37012900 |
| C | 1.67004600  | 4.43523800 | 0.94708500  |
| C | 0.00110300  | 2.72255400 | 1.19239100  |
| H | -2.00293200 | 5.76342600 | -2.74753900 |
| H | -0.30460600 | 6.04535100 | -3.11061500 |
| H | 2.06890500  | 6.32016300 | -0.03074000 |
| H | 3.44193700  | 5.21506500 | -0.03692700 |
| C | -1.33165500 | 3.38535600 | -4.25783400 |
| C | -0.51548400 | 1.19920200 | -3.53772200 |
| O | 0.57271300  | 1.00516700 | -1.38731600 |
| C | 1.91154900  | 4.39934300 | 2.31610700  |
| C | 0.21154700  | 2.65783600 | 2.58065200  |
| O | -0.90365600 | 1.82050300 | 0.58684500  |
| H | -1.86524600 | 3.99040800 | -4.98413100 |
| C | -1.14268400 | 2.02337500 | -4.48618100 |
| P | -0.28930500 | 0.50824600 | -0.11203000 |
| H | 2.67485600  | 5.03230200 | 2.75707000  |

|   |             |             |             |
|---|-------------|-------------|-------------|
| C | 1.15717300  | 3.54749000  | 3.12100700  |
| H | -1.51823900 | 1.56702200  | -5.39564400 |
| O | -1.57950400 | -0.21042200 | -0.66336400 |
| O | 0.60012500  | -0.34289600 | 0.71998700  |
| H | 1.31204100  | 3.54023400  | 4.19403800  |
| H | -2.44737900 | 0.24234800  | -0.57103500 |
| C | 1.82596700  | 4.64121500  | -1.42423200 |
| H | 2.47589100  | 3.81529300  | -1.72195000 |
| H | 1.78166300  | 5.34648900  | -2.25699600 |
| C | -4.02208800 | -2.54831800 | -4.09742600 |
| C | -2.81593800 | -3.14526000 | -4.34559100 |
| C | -1.59645900 | -2.40548200 | -4.25134500 |
| C | -1.64284800 | -1.00871900 | -3.88680000 |
| C | -2.92545400 | -0.43380900 | -3.62036300 |
| C | -4.07217400 | -1.17356500 | -3.73163500 |
| C | -0.36032000 | -3.01623200 | -4.47978300 |
| C | -0.43935700 | -0.26933800 | -3.78912500 |
| C | 0.80526600  | -0.91030200 | -3.98941500 |
| C | 0.83899200  | -2.31586900 | -4.32588800 |
| C | 2.10107600  | -2.97543000 | -4.44658600 |
| H | 2.10691900  | -4.03573600 | -4.68325300 |
| C | 3.27344900  | -2.28981400 | -4.27624400 |
| C | 3.24471900  | -0.89166000 | -4.01250600 |
| C | 2.05550000  | -0.22575100 | -3.87997400 |
| H | -0.32955900 | -4.06852100 | -4.74950000 |
| H | -4.94285400 | -3.11674900 | -4.18036200 |
| H | -2.76217500 | -4.19270500 | -4.62828300 |
| H | -2.98481900 | 0.60269100  | -3.31595800 |
| H | -5.03049800 | -0.70821100 | -3.53796400 |
| H | 4.22702000  | -2.79972600 | -4.36670100 |
| H | 4.18181400  | -0.35142400 | -3.93131000 |
| H | 2.04771300  | 0.84019400  | -3.69232300 |
| C | 1.50993600  | -0.96356400 | 6.07553000  |
| C | 0.14235500  | -0.94649900 | 6.04897200  |
| C | -0.57070600 | -0.05696200 | 5.18715700  |
| C | 0.16468600  | 0.81700100  | 4.30388100  |
| C | 1.59108600  | 0.73477500  | 4.34240700  |
| C | 2.24078100  | -0.10452500 | 5.20960400  |
| C | -1.96611500 | -0.00263800 | 5.20355800  |
| C | -0.53687800 | 1.72087100  | 3.46631800  |
| C | -1.94875000 | 1.79346200  | 3.53160000  |
| C | -2.67041200 | 0.90415000  | 4.41118400  |
| C | -4.09636500 | 0.98898600  | 4.47798400  |
| H | -4.62013000 | 0.31075600  | 5.14632100  |

|   |             |             |             |
|---|-------------|-------------|-------------|
| C | -4.78309500 | 1.91120100  | 3.73897700  |
| C | -4.07264300 | 2.82119000  | 2.90576700  |
| C | -2.70986900 | 2.76111100  | 2.80327200  |
| H | -2.51430400 | -0.66004300 | 5.87301600  |
| H | 2.03868000  | -1.63245000 | 6.74645600  |
| H | -0.43261400 | -1.59884500 | 6.69975100  |
| H | 2.16206400  | 1.35485500  | 3.67122500  |
| H | 3.32629800  | -0.12974700 | 5.22016700  |
| H | -5.86486800 | 1.96717500  | 3.79034600  |
| H | -4.62460800 | 3.56560100  | 2.34491300  |
| H | -2.19055400 | 3.47756700  | 2.17969700  |
| C | -0.50056700 | -4.57239400 | -1.36792400 |
| C | 1.60730300  | -3.21754000 | -0.87001700 |
| C | 0.15515900  | -3.19567900 | -1.14777500 |
| H | -1.25963600 | -4.43740700 | -2.14080400 |
| H | 0.23477300  | -5.26087900 | -1.79879100 |
| H | 2.21305800  | -4.03343500 | -1.25842700 |
| H | -0.37282400 | -2.58324500 | -0.41827500 |
| H | 0.08545700  | -2.64438300 | -2.09285000 |
| N | 2.23956000  | -2.24510200 | -0.30459500 |
| H | 1.68281000  | -1.42937200 | 0.05493700  |
| C | 3.65702100  | -2.16387100 | -0.19468800 |
| C | 4.42761900  | -3.28985900 | 0.05776400  |
| C | 4.24511000  | -0.90284800 | -0.41099400 |
| C | 5.82351600  | -3.18533300 | 0.07254900  |
| H | 3.96499800  | -4.24212900 | 0.28690000  |
| C | 5.63550400  | -0.81042100 | -0.40060800 |
| C | 6.42139800  | -1.94196000 | -0.16676800 |
| H | 6.10984000  | 0.15083700  | -0.55642700 |
| H | 7.49826900  | -1.83435500 | -0.15518600 |
| O | 6.49374800  | -4.33704100 | 0.33786600  |
| C | 7.91524500  | -4.28616100 | 0.39253200  |
| H | 8.26047900  | -3.60582000 | 1.18006500  |
| H | 8.24153400  | -5.30014700 | 0.62165000  |
| H | 8.34149000  | -3.97600000 | -0.56897900 |
| O | 3.38336800  | 0.12556900  | -0.60714100 |
| C | 3.82782600  | 1.28050700  | -1.31688500 |
| H | 4.40104200  | 0.94290500  | -2.18441400 |
| H | 2.89809200  | 1.71812600  | -1.68759800 |
| C | 4.62248300  | 2.32188300  | -0.55408700 |
| C | 5.33260200  | 3.25135000  | -1.34879900 |
| C | 4.62297000  | 2.44386400  | 0.84824000  |
| C | 6.05052800  | 4.27834300  | -0.73148100 |
| C | 5.36212500  | 3.48400200  | 1.42849800  |



|   |             |             |             |
|---|-------------|-------------|-------------|
| C | 6.07370600  | 4.39399400  | 0.65564100  |
| H | 6.59373400  | 4.98891800  | -1.34719600 |
| H | 5.36696900  | 3.57621500  | 2.51052700  |
| H | 6.63701100  | 5.19170200  | 1.12924400  |
| C | 3.86741300  | 1.51810200  | 1.76969500  |
| H | 2.82595300  | 1.38876600  | 1.47191900  |
| H | 4.31655300  | 0.52095600  | 1.80907300  |
| H | 3.89205600  | 1.92811400  | 2.78051900  |
| C | 5.31888000  | 3.17104100  | -2.85875600 |
| H | 4.30160700  | 3.19476800  | -3.26673300 |
| H | 5.86461100  | 4.01161800  | -3.29182500 |
| H | 5.78947200  | 2.25131400  | -3.22767800 |
| C | -3.08786300 | -3.08880100 | -0.08617000 |
| C | -2.40498200 | -3.38282800 | 1.12223200  |
| C | -2.87542100 | -2.74842900 | 2.31460900  |
| C | -3.85706100 | -1.75761000 | 2.21307300  |
| C | -4.42910600 | -1.45256500 | 0.98608500  |
| C | -4.09230400 | -2.14237200 | -0.17041200 |
| H | -2.80196500 | -3.58020200 | -1.00499900 |
| H | -4.20306500 | -1.23462500 | 3.09598400  |
| H | -4.56040100 | -1.93241000 | -1.12022700 |
| C | -1.27190000 | -4.29097000 | 1.06655900  |
| C | -1.17211200 | -5.22972000 | -0.11038500 |
| H | -2.16389900 | -5.59105400 | -0.39205200 |
| H | -0.60129400 | -6.11469000 | 0.17156100  |
| C | -0.04969400 | -4.08808400 | 1.82791600  |
| C | 0.93358100  | -5.10556600 | 1.94129100  |
| C | 0.29148200  | -2.81202600 | 2.33338200  |
| C | 2.17064000  | -4.85796700 | 2.52735100  |
| H | 0.71598000  | -6.11008400 | 1.59782900  |
| C | 1.53810000  | -2.56127200 | 2.88792600  |
| H | -0.39054500 | -1.98465600 | 2.20197300  |
| C | 2.48641900  | -3.58066600 | 2.99730300  |
| H | 2.89037600  | -5.66621900 | 2.61748400  |
| H | 1.77253000  | -1.55694800 | 3.21258200  |
| H | 3.46033600  | -3.38035000 | 3.43179900  |
| C | -2.42088300 | -3.16096600 | 3.69385500  |
| H | -3.24601900 | -3.05007900 | 4.40221100  |
| H | -2.09414700 | -4.20236900 | 3.70529500  |
| H | -1.58893100 | -2.55426700 | 4.05930000  |
| O | -5.45616000 | -0.46704500 | 0.98690100  |
| S | -5.37198800 | 0.82742800  | 0.01012300  |
| O | -5.90005900 | 1.97618500  | 0.71162800  |
| O | -4.08842300 | 0.86964200  | -0.69760600 |

|   |             |             |             |
|---|-------------|-------------|-------------|
| C | -6.67768100 | 0.36255200  | -1.25887900 |
| F | -6.47322800 | 1.11538200  | -2.33846800 |
| F | -7.87494500 | 0.59901900  | -0.75053300 |
| F | -6.57663300 | -0.92583300 | -1.59073000 |

**SR-TS2**

*B3LYP-D3/6-31G(d,p):*

Sum of electronic and thermal Free Energies = -4858.932184

*SMD//M062X/6-31+G(d,p):*

Sum of electronic and thermal Free Energies = -4856.90246

|   |             |             |             |
|---|-------------|-------------|-------------|
| C | 0.98856100  | 3.85619800  | 2.71163000  |
| C | 2.26644600  | 4.63097200  | 3.17351100  |
| C | 1.17485200  | 2.54846800  | 3.46905500  |
| C | 0.83167900  | 3.95493300  | 1.20415500  |
| H | 3.11374900  | 4.30165900  | 2.56328400  |
| H | 2.16034500  | 5.71094100  | 3.04831000  |
| C | 2.47373900  | 4.19117100  | 4.63616600  |
| C | -0.51312000 | 5.71518000  | 2.11429000  |
| C | 1.93086800  | 2.78094700  | 4.63033800  |
| C | 0.70497100  | 1.26226100  | 3.22956000  |
| C | 0.09289300  | 5.09956500  | 0.87384600  |
| C | 1.37504200  | 3.18768400  | 0.18360000  |
| H | 3.52096500  | 4.23361400  | 4.94906200  |
| H | 1.90926300  | 4.82748300  | 5.32931300  |
| H | -0.00558500 | 6.65180500  | 2.37560500  |
| H | -1.57144500 | 5.95577900  | 1.97610400  |
| C | 2.12260600  | 1.77502700  | 5.57062400  |
| C | 0.86159900  | 0.22928200  | 4.16478700  |
| O | 0.07808500  | 0.96154600  | 2.00732900  |
| C | 0.00446300  | 5.52240600  | -0.44822700 |
| C | 1.34779800  | 3.60346200  | -1.15801000 |
| O | 1.95730700  | 1.95005100  | 0.51563400  |
| H | 2.70246800  | 1.96119800  | 6.46920600  |
| C | 1.56401200  | 0.51819900  | 5.34538500  |
| P | 0.96732400  | 0.68616800  | 0.69408200  |
| H | -0.55581600 | 6.41520400  | -0.70743700 |
| C | 0.66887600  | 4.80129700  | -1.44107400 |
| H | 1.69004700  | -0.27391600 | 6.07547300  |
| O | 1.98708800  | -0.44347800 | 1.12677400  |
| O | 0.06425400  | 0.40702700  | -0.45194000 |
| H | 0.65638900  | 5.15632700  | -2.46568000 |
| H | 2.75969600  | -0.49017900 | 0.51769700  |
| C | -0.28221600 | 4.63105800  | 3.19145200  |

|   |             |             |             |
|---|-------------|-------------|-------------|
| H | -1.13032500 | 3.94067300  | 3.22385100  |
| H | -0.15703800 | 5.04018100  | 4.19629300  |
| C | 2.93409400  | -4.47723200 | 3.68757500  |
| C | 1.58908200  | -4.68489100 | 3.82899200  |
| C | 0.68098400  | -3.58527300 | 3.91792500  |
| C | 1.20285400  | -2.23945900 | 3.89862400  |
| C | 2.61633500  | -2.07122700 | 3.75436300  |
| C | 3.45016600  | -3.15109100 | 3.63831500  |
| C | -0.70144100 | -3.78384100 | 3.97529000  |
| C | 0.31231100  | -1.14231200 | 3.97030700  |
| C | -1.08583500 | -1.35738300 | 3.94353300  |
| C | -1.59574000 | -2.71013400 | 3.94079800  |
| C | -3.00832000 | -2.92198700 | 3.88027800  |
| H | -3.37532300 | -3.94477800 | 3.88299100  |
| C | -3.87919800 | -1.86805800 | 3.81475200  |
| C | -3.38177800 | -0.53398900 | 3.83431400  |
| C | -2.03684900 | -0.28849000 | 3.91494800  |
| H | -1.09154900 | -4.79806000 | 4.00512200  |
| H | 3.61266400  | -5.32086600 | 3.61028600  |
| H | 1.18316200  | -5.69190700 | 3.86085700  |
| H | 3.01565300  | -1.06672400 | 3.70098100  |
| H | 4.51556100  | -2.99764100 | 3.49930500  |
| H | -4.94712400 | -2.04431500 | 3.73856700  |
| H | -4.08004300 | 0.29593000  | 3.79383100  |
| H | -1.67855500 | 0.73229900  | 3.94860200  |
| C | -0.02468400 | 1.43127900  | -5.67755100 |
| C | 1.31018700  | 1.17102000  | -5.53047200 |
| C | 2.03435000  | 1.63966700  | -4.39062600 |
| C | 1.33714300  | 2.37561500  | -3.36113800 |
| C | -0.06154000 | 2.60335100  | -3.55119400 |
| C | -0.71493400 | 2.16353100  | -4.67199700 |
| C | 3.40348800  | 1.39855200  | -4.25696700 |
| C | 2.04809600  | 2.84058700  | -2.22863900 |
| C | 3.44474700  | 2.62618000  | -2.13119800 |
| C | 4.12640800  | 1.88397100  | -3.16544600 |
| C | 5.53424000  | 1.66960600  | -3.06334700 |
| H | 6.02579600  | 1.09625400  | -3.84295500 |
| C | 6.24682600  | 2.16552300  | -2.00725700 |
| C | 5.58669300  | 2.92113900  | -1.00008600 |
| C | 4.23749600  | 3.14519400  | -1.06093400 |
| H | 3.92248300  | 0.83737700  | -5.02941100 |
| H | -0.55898900 | 1.08741600  | -6.55733700 |
| H | 1.85383500  | 0.61511900  | -6.28884600 |
| H | -0.59790800 | 3.15272700  | -2.78932200 |

|   |             |             |             |
|---|-------------|-------------|-------------|
| H | -1.77377400 | 2.36795200  | -4.79761800 |
| H | 7.31446400  | 1.98798400  | -1.93618700 |
| H | 6.16397400  | 3.33218700  | -0.17791200 |
| H | 3.76097200  | 3.74426700  | -0.29563000 |
| C | -0.19218500 | -4.48270400 | 0.55878200  |
| C | -1.63379800 | -2.63684400 | -0.00875400 |
| C | -0.32421300 | -2.94600000 | 0.65962100  |
| H | 0.85672400  | -4.76505400 | 0.46281600  |
| H | -0.56302800 | -4.94986100 | 1.47355200  |
| H | -2.42819300 | -3.29411600 | 0.31861100  |
| H | 0.50264800  | -2.42465500 | 0.17784100  |
| H | -0.35581100 | -2.60627100 | 1.69358500  |
| N | -2.10409900 | -1.37540700 | -0.20461800 |
| H | -1.42814000 | -0.61738000 | -0.40066700 |
| C | -3.46030100 | -1.06859700 | -0.16260100 |
| C | -4.37108400 | -1.85695000 | 0.55504100  |
| C | -3.93030400 | 0.08760700  | -0.84810000 |
| C | -5.72301000 | -1.53817100 | 0.58542600  |
| H | -4.03626300 | -2.67910200 | 1.17056000  |
| C | -5.29271200 | 0.38608800  | -0.82509400 |
| C | -6.18820300 | -0.41711400 | -0.12258600 |
| H | -5.66219100 | 1.26316500  | -1.33647200 |
| H | -7.23637700 | -0.14797000 | -0.11438700 |
| O | -6.50253100 | -2.35116400 | 1.34878100  |
| C | -7.89121300 | -2.04990700 | 1.45101100  |
| H | -8.05388200 | -1.05759400 | 1.88752100  |
| H | -8.38484000 | -2.10416600 | 0.47373100  |
| H | -8.31243800 | -2.80846500 | 2.10993900  |
| O | -2.98539100 | 0.80586600  | -1.48158400 |
| C | -3.34422400 | 2.04918500  | -2.10966600 |
| H | -2.40311100 | 2.36722300  | -2.55342100 |
| H | -4.03666600 | 1.82580200  | -2.92535900 |
| C | -3.90745700 | 3.11998500  | -1.19704100 |
| C | -3.41457600 | 3.30978700  | 0.10919700  |
| C | -4.90733500 | 3.97368400  | -1.71275800 |
| C | -3.95534100 | 4.33961500  | 0.88831800  |
| C | -5.41379600 | 4.99623300  | -0.90545100 |
| C | -4.94766900 | 5.17783800  | 0.39306300  |
| H | -3.58382800 | 4.47802300  | 1.89973700  |
| H | -6.18030800 | 5.65383600  | -1.30415200 |
| H | -5.35213200 | 5.97278000  | 1.01171800  |
| C | -5.43984100 | 3.82584500  | -3.12136300 |
| H | -5.91886200 | 2.85264600  | -3.28732000 |
| H | -6.18878600 | 4.59297000  | -3.32781300 |

|   |             |             |             |
|---|-------------|-------------|-------------|
| H | -4.65158900 | 3.92754100  | -3.87552600 |
| C | -2.33432900 | 2.44847000  | 0.70891400  |
| H | -1.54803700 | 2.20359400  | -0.00336200 |
| H | -1.87501100 | 2.95889400  | 1.55310100  |
| H | -2.72824600 | 1.49920800  | 1.08773200  |
| C | 1.20983900  | -4.18862600 | -2.12021100 |
| C | 0.10877600  | -3.30926300 | -2.18775000 |
| C | 0.34399000  | -1.98209100 | -2.63562000 |
| C | 1.67213200  | -1.53773900 | -2.75930700 |
| C | 2.72130100  | -2.41905100 | -2.56332600 |
| C | 2.51238600  | -3.77003700 | -2.32459000 |
| H | 1.05181900  | -5.23129200 | -1.88447500 |
| H | 1.87478600  | -0.50351900 | -3.00558300 |
| H | 3.34692100  | -4.45560000 | -2.25522100 |
| C | -1.20564500 | -3.79825900 | -1.64420500 |
| C | -1.04284700 | -4.95863100 | -0.65397700 |
| H | -0.61400600 | -5.83539100 | -1.14839000 |
| H | -2.03290800 | -5.28266500 | -0.32561600 |
| C | -2.39084500 | -3.81059100 | -2.52876200 |
| C | -2.24982500 | -3.63518300 | -3.91974600 |
| C | -3.68907800 | -4.03109600 | -2.02319500 |
| C | -3.35499400 | -3.66433300 | -4.76279600 |
| H | -1.25903300 | -3.49604200 | -4.33579400 |
| C | -4.79501000 | -4.04496600 | -2.86416100 |
| H | -3.84428000 | -4.17717800 | -0.96133800 |
| C | -4.63450400 | -3.85959300 | -4.23901700 |
| H | -3.21739600 | -3.53945400 | -5.83196300 |
| H | -5.78383100 | -4.20147200 | -2.44565600 |
| H | -5.49757300 | -3.87508200 | -4.89652600 |
| C | -0.73757700 | -1.00616500 | -3.01172400 |
| H | -0.51080200 | -0.01418800 | -2.62717700 |
| H | -0.78251800 | -0.93095900 | -4.10376000 |
| H | -1.72502800 | -1.30081100 | -2.66893800 |
| O | 4.06795300  | -1.97939900 | -2.65562500 |
| S | 4.78478600  | -1.35012500 | -1.33476600 |
| O | 6.15792600  | -1.10292000 | -1.70521500 |
| O | 3.93038400  | -0.32649900 | -0.72816300 |
| C | 4.77658000  | -2.76964100 | -0.09492800 |
| F | 3.54412900  | -2.94335600 | 0.38569500  |
| F | 5.59330500  | -2.42518900 | 0.89496700  |
| F | 5.20454600  | -3.88798500 | -0.67064700 |

#### SR-IV

Sum of electronic and thermal Free Energies = -4858.956759

|   |             |             |             |
|---|-------------|-------------|-------------|
| C | -1.17609900 | -4.18003900 | -1.81832400 |
| C | -2.46196900 | -4.77651200 | -2.47598500 |
| C | -1.64936000 | -4.01829200 | -0.38199900 |
| C | -0.61029700 | -3.05048400 | -2.65873200 |
| H | -3.14187700 | -3.95294800 | -2.71693900 |
| H | -2.24352800 | -5.31440400 | -3.40133700 |
| C | -3.08203600 | -5.66237900 | -1.37608200 |
| C | 0.56672300  | -5.02074800 | -3.33419100 |
| C | -2.65247600 | -4.96306100 | -0.10629500 |
| C | -1.20013300 | -3.20544000 | 0.64981300  |
| C | 0.29397500  | -3.55759300 | -3.60421400 |
| C | -0.90837000 | -1.69521300 | -2.66162200 |
| H | -4.16943800 | -5.74448700 | -1.46138800 |
| H | -2.68304600 | -6.68385200 | -1.41384700 |
| H | 0.04654200  | -5.65643200 | -4.06124200 |
| H | 1.62968100  | -5.27217600 | -3.39892400 |
| C | -3.12231000 | -5.14575600 | 1.18922100  |
| C | -1.59275300 | -3.41861900 | 1.97956100  |
| O | -0.35521600 | -2.11102300 | 0.36546500  |
| C | 0.80768100  | -2.72870300 | -4.59747900 |
| C | -0.42085200 | -0.83057900 | -3.65673500 |
| O | -1.72352500 | -1.19921200 | -1.63832800 |
| H | -3.90070400 | -5.87301000 | 1.39801000  |
| C | -2.55918600 | -4.40204700 | 2.22780900  |
| P | -1.03488700 | -0.76723100 | -0.23571500 |
| H | 1.48419900  | -3.11940500 | -5.35148300 |
| C | 0.42742600  | -1.38547000 | -4.63044600 |
| H | -2.86664800 | -4.57380000 | 3.25396200  |
| O | -2.31458900 | -0.52407600 | 0.65477200  |
| O | -0.02965100 | 0.31290900  | -0.33574700 |
| H | 0.79320800  | -0.73869100 | -5.42046500 |
| H | -2.98137100 | 0.02728700  | 0.18192300  |
| C | -0.00242100 | -5.20973000 | -1.91133500 |
| H | 0.75878600  | -4.94302300 | -1.16981500 |
| H | -0.32884100 | -6.23091500 | -1.70321800 |
| C | -2.74723100 | 0.28900500  | 5.44914000  |
| C | -1.49368200 | -0.15053200 | 5.77828800  |
| C | -0.84286100 | -1.16381400 | 5.00755400  |
| C | -1.52749900 | -1.72464700 | 3.86552800  |
| C | -2.83612400 | -1.23515200 | 3.55948600  |
| C | -3.42506600 | -0.26549800 | 4.32637700  |
| C | 0.43132800  | -1.62655500 | 5.34334300  |
| C | -0.90218900 | -2.74191000 | 3.11595100  |
| C | 0.37092200  | -3.23300600 | 3.49108000  |

|   |             |             |             |
|---|-------------|-------------|-------------|
| C | 1.05217800  | -2.65029700 | 4.62201000  |
| C | 2.32913400  | -3.16497700 | 5.00542300  |
| H | 2.83106600  | -2.71396100 | 5.85665400  |
| C | 2.89411100  | -4.21981600 | 4.33962400  |
| C | 2.21599400  | -4.81168300 | 3.23669000  |
| C | 1.00288000  | -4.32955800 | 2.82237900  |
| H | 0.94059700  | -1.19979200 | 6.20343400  |
| H | -3.23628700 | 1.04907200  | 6.05036800  |
| H | -0.97464700 | 0.25085100  | 6.64400800  |
| H | -3.35302800 | -1.64496200 | 2.70185000  |
| H | -4.42220700 | 0.08303600  | 4.08240500  |
| H | 3.85498900  | -4.61449700 | 4.65455300  |
| H | 2.67096900  | -5.64810700 | 2.71642300  |
| H | 0.49846000  | -4.79230700 | 1.98323900  |
| C | 2.06828700  | 3.72414300  | -3.79217000 |
| C | 0.74010500  | 4.02036000  | -3.93535300 |
| C | -0.25569500 | 2.99742400  | -3.88395900 |
| C | 0.15087900  | 1.62130000  | -3.71889500 |
| C | 1.54640700  | 1.36545400  | -3.54034300 |
| C | 2.47135800  | 2.37835600  | -3.57520000 |
| C | -1.61371500 | 3.30630900  | -3.97944100 |
| C | -0.82771600 | 0.59893500  | -3.73117600 |
| C | -2.19788100 | 0.92383600  | -3.88672100 |
| C | -2.59392200 | 2.30912800  | -3.97610200 |
| C | -3.97732500 | 2.63527600  | -4.10327700 |
| H | -4.25926700 | 3.68289700  | -4.14601000 |
| C | -4.92744300 | 1.65371100  | -4.18086700 |
| C | -4.53880200 | 0.28766400  | -4.14540000 |
| C | -3.22307300 | -0.06459400 | -4.00267800 |
| H | -1.91581300 | 4.34506000  | -4.08565500 |
| H | 2.81421500  | 4.51122100  | -3.82964900 |
| H | 0.41406900  | 5.04582100  | -4.08351100 |
| H | 1.86785800  | 0.34772900  | -3.37057900 |
| H | 3.52257200  | 2.15104500  | -3.43748100 |
| H | -5.97603200 | 1.91417200  | -4.27147400 |
| H | -5.29625100 | -0.48449600 | -4.23467900 |
| H | -2.94950600 | -1.11175200 | -3.99286800 |
| C | 1.25008300  | 1.63861500  | 4.35915400  |
| C | 2.15027700  | 1.96601500  | 2.11602800  |
| C | 1.58229500  | 0.88372400  | 3.05949400  |
| H | 0.29398100  | 1.30515900  | 4.75967700  |
| H | 2.00151200  | 1.44782200  | 5.13005800  |
| H | 3.16640000  | 2.20993700  | 2.43026600  |
| H | 0.67788500  | 0.45918900  | 2.61292900  |

|   |             |             |             |
|---|-------------|-------------|-------------|
| H | 2.28834100  | 0.06444900  | 3.20041000  |
| N | 2.24390800  | 1.42486500  | 0.77201900  |
| H | 1.45636900  | 0.83808900  | 0.45378700  |
| C | 3.34222000  | 1.43177900  | -0.00893900 |
| C | 4.36253000  | 2.39505200  | 0.07917400  |
| C | 3.49885300  | 0.33698200  | -0.95279100 |
| C | 5.49272100  | 2.29772100  | -0.71764300 |
| H | 4.25283700  | 3.25773500  | 0.72009300  |
| C | 4.65964200  | 0.24398100  | -1.72930000 |
| C | 5.64797600  | 1.20697400  | -1.62136200 |
| H | 4.79218900  | -0.59517800 | -2.39789500 |
| H | 6.53930300  | 1.11937300  | -2.22850900 |
| O | 6.39955900  | 3.28520500  | -0.58360700 |
| C | 7.57271300  | 3.27819700  | -1.39875500 |
| H | 7.31671400  | 3.32147500  | -2.46284400 |
| H | 8.12520300  | 4.17505000  | -1.12256800 |
| H | 8.18983900  | 2.39564000  | -1.19938100 |
| O | 2.51706900  | -0.54834600 | -0.92387200 |
| C | 2.61284100  | -1.84057400 | -1.56394100 |
| H | 1.62490400  | -2.26138400 | -1.37929900 |
| H | 2.71093100  | -1.69027400 | -2.63953800 |
| C | 3.70309300  | -2.72120700 | -1.00208300 |
| C | 3.88405400  | -2.83009700 | 0.39338300  |
| C | 4.49042900  | -3.48449100 | -1.88965100 |
| C | 4.85664700  | -3.71224100 | 0.87604500  |
| C | 5.45068800  | -4.35561800 | -1.36574400 |
| C | 5.63509600  | -4.47164400 | 0.00851900  |
| H | 4.99330600  | -3.80071500 | 1.94931800  |
| H | 6.05590900  | -4.94683600 | -2.04629600 |
| H | 6.38263800  | -5.15370300 | 0.40126900  |
| C | 4.32394400  | -3.39859800 | -3.39084000 |
| H | 3.31398400  | -3.66809300 | -3.71245600 |
| H | 4.51619500  | -2.38941500 | -3.77728600 |
| H | 5.02294800  | -4.07187600 | -3.89097700 |
| C | 3.09496700  | -2.01253400 | 1.38689500  |
| H | 2.03135400  | -1.96418500 | 1.14584600  |
| H | 3.19694300  | -2.43281400 | 2.38618500  |
| H | 3.46637000  | -0.98445200 | 1.42496400  |
| C | -1.25026000 | 2.71318500  | 2.62385100  |
| C | -0.16193600 | 3.04697500  | 1.80170400  |
| C | -0.40661400 | 3.25792100  | 0.42373000  |
| C | -1.72520400 | 3.22832600  | -0.05085800 |
| C | -2.77067100 | 2.97026800  | 0.81742200  |
| C | -2.55854100 | 2.66858200  | 2.15201400  |



|   |             |            |             |
|---|-------------|------------|-------------|
| H | -1.10075000 | 2.50109100 | 3.67270100  |
| H | -1.92783400 | 3.42479900 | -1.09847200 |
| H | -3.38463400 | 2.43891300 | 2.81242500  |
| C | 1.24013900  | 3.22867700 | 2.41363100  |
| C | 1.23840300  | 3.13371700 | 3.97409800  |
| H | 0.41128500  | 3.70332700 | 4.40174000  |
| H | 2.15104300  | 3.61509000 | 4.33061400  |
| C | 1.85282300  | 4.59530100 | 2.06888500  |
| C | 1.05031600  | 5.68036100 | 1.69145400  |
| C | 3.21972200  | 4.84288700 | 2.27060600  |
| C | 1.59956000  | 6.94215900 | 1.46628000  |
| H | -0.01603400 | 5.54057900 | 1.56499200  |
| C | 3.77568200  | 6.09971500 | 2.03747100  |
| H | 3.87027200  | 4.05908100 | 2.64498400  |
| C | 2.96744900  | 7.15726200 | 1.62287600  |
| H | 0.94992300  | 7.75990700 | 1.17020300  |
| H | 4.83929500  | 6.25114300 | 2.19244200  |
| H | 3.39534700  | 8.13768300 | 1.44134500  |
| C | 0.65831300  | 3.53399500 | -0.60554600 |
| H | 0.74328400  | 2.67216900 | -1.26882900 |
| H | 0.38207900  | 4.39440200 | -1.21838800 |
| H | 1.63514700  | 3.74093800 | -0.18160000 |
| O | -4.10748300 | 3.15044600 | 0.36406700  |
| S | -4.89240200 | 1.97655800 | -0.43090800 |
| O | -5.85131700 | 2.60877700 | -1.30686400 |
| O | -3.94826500 | 0.95594500 | -0.89670300 |
| C | -5.84279200 | 1.18705400 | 0.97285200  |
| F | -4.97414800 | 0.52065400 | 1.74615600  |
| F | -6.72390600 | 0.33937800 | 0.45936500  |
| F | -6.45545900 | 2.11724500 | 1.69006600  |

## (6) Control Experiments

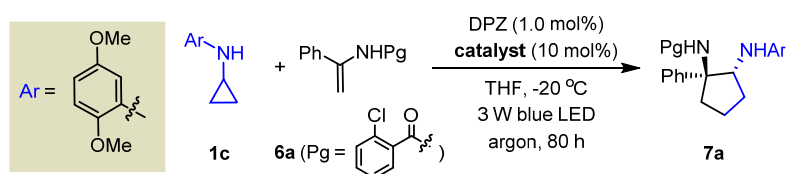

**C3** as the catalyst, with  $\text{Na}_2\text{HPO}_4$ : **7a**: 77% yield, 95% ee (0.1 mmol scale)

**C3** as the catalyst, no  $\text{Na}_2\text{HPO}_4$ : **7a**: 37% yield, 93% ee (0.1 mmol scale)

**C3Na** as the catalyst, no  $\text{Na}_2\text{HPO}_4$ : **7a**: 68% yield, 0% ee (0.1 mmol scale)

As the above equation shown, the reaction of **1c** with **6a** could afford product **7a** in 77% yield with 95% ee (also see Table 3 in the manuscript). We then attempted it under the established reaction conditions but without  $\text{Na}_2\text{HPO}_4$ . It was found that **7a** was obtained in 37% yield with 93% ee. The reaction was also evaluated with sodium salt of CPA **C3** (i.e., **C3Na**), leading to **7a** in

68% yield with 0% ee. The results indicate that  $\text{Na}_2\text{HPO}_4$  can promote the transformation but roughly does not affect the enantiocontrol effect of catalyst. Furthermore, the generation of **C3Na** when **C3** in the presence of  $\text{Na}_2\text{HPO}_4$  might be excluded.

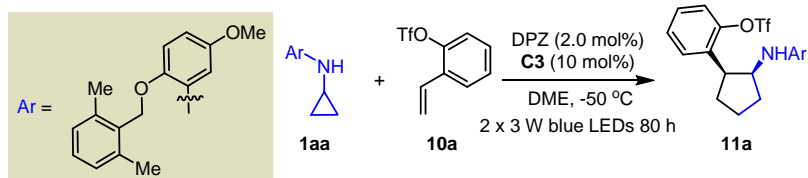

With KCl (0.55 equiv), 18-Crown-6 (0.2 equiv): **11a**: 84% yield, 80% ee, >19:1 dr  
 No KCl (0.55 equiv), 18-Crown-6 (0.2 equiv): **11a**: 62% yield, 80% ee, >19:1 dr

As the above equation shown,, the reaction of **1aa** with **10a** could afford product **11a** in 84% yield with 80% ee and >19:1 dr (also see Table 4 in the manuscript). We then attempted it under the established reaction conditions but without additives (i.e., KCl and 18-Crown-6). It was found that **11a** was obtained in 62% yield with 80% ee and >19:1 dr. The results indicate that the additives are useful to the acceleration of chemical transformations.

## 5. Synthetic applications

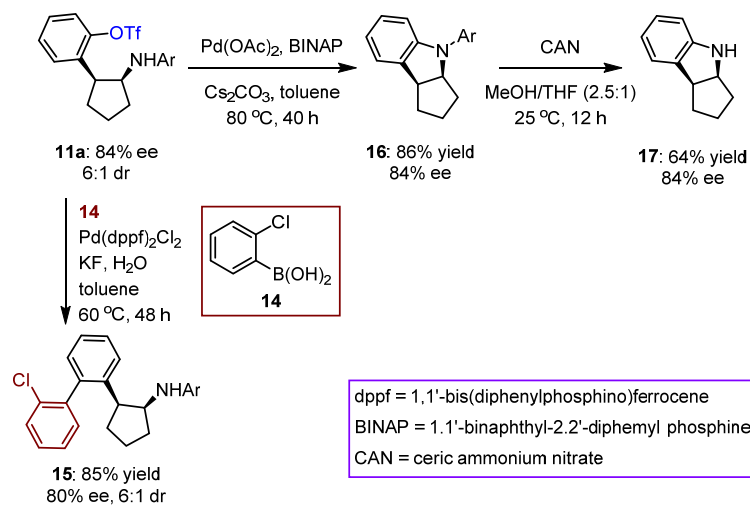

**15:** To a mixture of **11a** (61.1 mg, 0.1 mmol, 1.0 equiv.), KF (17.4 mg, 0.3 mmol, 3.0 equiv.), **14** (17.2 mg, 0.11 mmol, 1.1 equiv.), Pd(dppf)<sub>2</sub>Cl<sub>2</sub> (7.31 mg, 0.01 mmol, 10 mol %) was added 3.0 mL toluene at room temperature under argon atmosphere. H<sub>2</sub>O (0.3 mL) was added subsequently. The reaction mixture was warmed to 60 °C and stirred for 48 h. The reaction was quenched with sat. NaCl water solution and extracted with EA (3 × 4 mL). The combined organic phase was washed with brine, dried over Na<sub>2</sub>SO<sub>4</sub>, evaporated to give the crude products. The residue was purified by flash chromatography (*silica gel*, 30:1 hexanes/EtOAc) to give product **15**.

**16:** To a mixture of **11a** (54.9 mg, 0.1 mmol, 1.0 equiv.), Cs<sub>2</sub>CO<sub>3</sub> (97.7 mg, 0.3 mmol, 3.0 equiv.), BINAP (12.4 mg, 0.02 mmol, 20 mol%) and Pd(OAc)<sub>2</sub> (2.24 mg, 0.01 mmol, 10 mol%) was added 3.0 mL toluene at room temperature under argon atmosphere. The reaction mixture was warmed to 80 °C and stirred for 40 h. The reaction was quenched with sat. NaCl water solution and extracted with EA (3 × 4 mL). The combined organic phase was washed with brine, dried over Na<sub>2</sub>SO<sub>4</sub>, evaporated to give the crude products. The residue was purified by flash chromatography (*silica gel*, 30:1 hexanes/EtOAc) to give product **16**.

**17:** To a solution of CAN (438.4 mg, 0.8 mmol, 2.0 equiv.) in MeOH (1.0 mL) under an atmosphere of N<sub>2</sub> at 0 °C was added a solution of **16** (159.6 mg, 0.4 mmol, 1.0 equiv.) in MeOH/THF (v/v = 2:1, 4 mL) through a pressure-equalizing addition funnel over 30 min. The mixture was allowed to stir at 0 °C for an additional 30 min upon until 1.0 M HCl (2 mL) was

added. The resulting solution was allowed to warm to 25 °C and stirred for 12 h. After removal of solvent by evaporation, the resulting mixture was washed with 5.0 mL CH<sub>2</sub>Cl<sub>2</sub> for three times. The combined organic portion was then washed with 1.0 M aqueous HCl (3 x 5 mL). The combined aqueous layers were neutralized with solid Na<sub>2</sub>CO<sub>3</sub> until pH ≈ 7. The aqueous layer was washed with CH<sub>2</sub>Cl<sub>2</sub> (4 x 5 mL). The combined organic phase was washed with brine, dried over Na<sub>2</sub>SO<sub>4</sub>, evaporated to give the crude product. The residue was purified by flash chromatography (*silica gel*, 10:1 hexanes/EtOAc) to give product **17**.

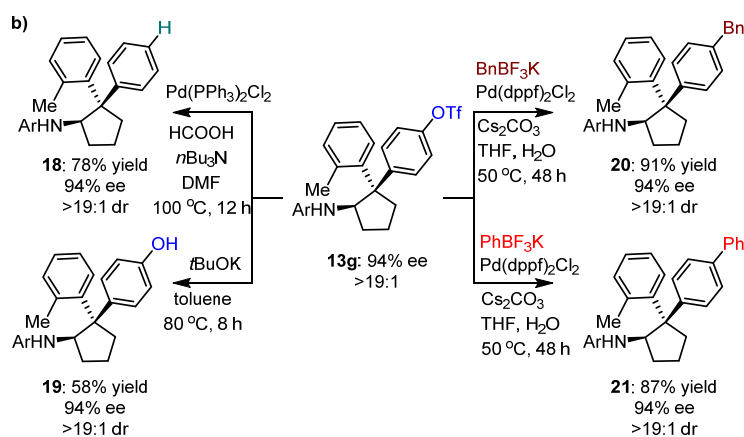

**18:** To a solution of **13g** (61.1 mg, 0.1 mmol, 1.0 equiv.) in DMF (3 mL) and formic acid (7.7 μL, 0.4 mmol, 4.0 equiv.) were added Pd(PPh<sub>3</sub>)<sub>2</sub>Cl<sub>2</sub> (3.5 mg, 0.005 mmol, 5 mol%) and tributylamine (142.9 μL, 0.6 mmol, 6.0 equiv.) at room temperature. After this mixture was stirred for 12 h at 100 °C under argon, the reaction was quenched with water (3 mL) and the resulting mixture was extracted with Et<sub>2</sub>O (3 mL) for three times. The combined organic layers were washed with brine (3 mL), dried with Na<sub>2</sub>SO<sub>4</sub> and concentrated. The resulting residue was purified by flash column chromatography (hexane/AcOEt, 30:1) on *silica gel* to give product **18**.

**19:** To a solution of **13g** (61.1 mg, 0.1 mmol, 1.0 equiv.) in toluene (3 mL) was added *t*-BuOK (33.6 mg, 0.3 mmol, 3.0 equiv.). The suspension was heated at 80 °C (oil bath temp) during 8 h. The crude mixture was quenched with ethyl acetate (3 mL) and a saturated aqueous solution of ammonium chloride (3 mL). The aqueous layer was extracted with ethyl acetate (2 × 10 mL). Organic layers were then combined, dried over MgSO<sub>4</sub>, evaporated to give the crude product. The residue was purified by flash chromatography (*silica gel*, 5:1 hexanes/EtOAc) to afford product **19**.

**20:** To a mixture of **13g** (61.1 mg, 0.1 mmol, 1.0 equiv.), Cs<sub>2</sub>CO<sub>3</sub> (97.7 mg, 0.3 mmol, 3.0 equiv.), BnBF<sub>3</sub>K (19.8 mg, 0.1 mmol, 1.0 equiv.), Pd(dppf)<sub>2</sub>Cl<sub>2</sub> (7.31 mg, 0.01 mmol, 10 mol %) was added 3.0 mL THF at room temperature under argon atmosphere. H<sub>2</sub>O (0.3 mL) was added subsequently. The reaction mixture was warmed to 50 °C and stirred 48 h. The reaction was quenched with sat. NaCl water solution and extracted with EA (3 × 4 mL). The combined organic phase was washed with brine, dried over Na<sub>2</sub>SO<sub>4</sub>, evaporated to give the crude products. The residue was purified by flash chromatography (*silica gel*, 30:1 hexanes/EtOAc) to give **20**.

**21:** To a mixture of **13g** (61.1 mg, 0.1 mmol, 1.0 equiv.), Cs<sub>2</sub>CO<sub>3</sub> (97.7 mg, 0.3 mmol, 3.0 equiv.), PhBF<sub>3</sub>K (18.4 mg, 0.1 mmol, 1.0 equiv.), Pd(dppf)<sub>2</sub>Cl<sub>2</sub> (7.31 mg, 0.01 mmol, 10 mol %) was added 3.0 mL THF at room temperature under argon atmosphere. H<sub>2</sub>O (0.3 mL) was added subsequently. The reaction mixture was warmed to 50 °C and stirred 48 h. The reaction was quenched with sat. NaCl water solution and extracted with EA (3 × 4 mL). The combined organic phase was washed with brine, dried over Na<sub>2</sub>SO<sub>4</sub>, evaporated to give the crude products. The residue was purified by flash chromatography (*silica gel*, 30:1 hexanes/EtOAc) to give **21**.

## 6. Determination of the absolute configurations

(1) Absolute configurations of **3** and **5** are determined by X-ray structure analysis of the product **3f**.

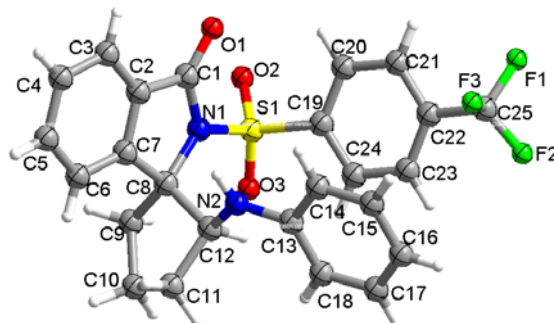

**Fig. S18.** Absolute configuration of **3f** (CCDC 2080352).

*Displacement ellipsoids are drawn at the 30% probability level.*

*(Solvent: ethyl acetate/hexane = 1:10)*

**Table S10** Crystal data and structure refinement for **3f**.

|                                        |                                                                                |
|----------------------------------------|--------------------------------------------------------------------------------|
| Identification code                    | <b>3f</b>                                                                      |
| Empirical formula                      | C <sub>25</sub> H <sub>21</sub> F <sub>3</sub> N <sub>2</sub> O <sub>3</sub> S |
| Formula weight                         | 486.50                                                                         |
| Temperature/K                          | 293(2)                                                                         |
| Crystal system                         | monoclinic                                                                     |
| Space group                            | P2 <sub>1</sub> /c                                                             |
| a/Å                                    | 15.2479(2)                                                                     |
| b/Å                                    | 19.58181(19)                                                                   |
| c/Å                                    | 16.7407(3)                                                                     |
| $\alpha$ /°                            | 90                                                                             |
| $\beta$ /°                             | 116.0951(19)                                                                   |
| $\gamma$ /°                            | 90                                                                             |
| Volume/Å <sup>3</sup>                  | 4488.94(12)                                                                    |
| Z                                      | 8                                                                              |
| $\rho_{\text{calc}}/\text{cm}^3$       | 1.440                                                                          |
| $\mu/\text{mm}^{-1}$                   | 1.779                                                                          |
| F(000)                                 | 2016.0                                                                         |
| Crystal size/mm <sup>3</sup>           | 0.15 × 0.12 × 0.1                                                              |
| Radiation                              | CuK $\alpha$ ( $\lambda$ = 1.54184)                                            |
| 2 $\theta$ range for data collection/° | 7.414 to 134.158                                                               |
| Index ranges                           | -13 ≤ h ≤ 18, -23 ≤ k ≤ 23, -19 ≤ l ≤ 20                                       |
| Reflections collected                  | 36582                                                                          |
| Independent reflections                | 8004 [ $R_{\text{int}}$ = 0.0313, $R_{\text{sigma}}$ = 0.0211]                 |

Data/restraints/parameters 8004/0/613  
 Goodness-of-fit on  $F^2$  1.039  
 Final R indexes [ $I \geq 2\sigma(I)$ ]  $R_1 = 0.0474$ ,  $wR_2 = 0.1294$   
 Final R indexes [all data]  $R_1 = 0.0557$ ,  $wR_2 = 0.1377$   
 Largest diff. peak/hole /  $e \text{ \AA}^{-3}$  0.34/-0.31

**Table S11 Fractional Atomic Coordinates ( $\times 10^4$ ) and Equivalent Isotropic Displacement Parameters ( $\text{\AA}^2 \times 10^3$ ) for 3f.  $U_{eq}$  is defined as 1/3 of the trace of the orthogonalised  $U_{ij}$  tensor.**

| Atom | x           | y          | z          | U(eq)     |
|------|-------------|------------|------------|-----------|
| C1   | 491.7(15)   | 6955.4(10) | 2739.4(14) | 44.9(4)   |
| C2   | 750.3(15)   | 7142.7(10) | 3665.3(14) | 44.9(4)   |
| C3   | 1505.0(18)  | 7559.7(11) | 4223.2(17) | 56.2(5)   |
| C4   | 1580(2)     | 7692.5(12) | 5057.3(18) | 65.6(6)   |
| C5   | 914(2)      | 7414.1(13) | 5319.6(18) | 68.5(7)   |
| C6   | 161(2)      | 7000.1(12) | 4761.1(17) | 61.5(6)   |
| C7   | 83.2(16)    | 6856.7(10) | 3920.8(15) | 47.2(5)   |
| C8   | -659.1(15)  | 6423.7(10) | 3189.0(14) | 46.1(4)   |
| C9   | -1714.8(17) | 6590.2(13) | 3017.3(18) | 61.7(6)   |
| C10  | -1982(2)    | 6049.7(17) | 3532(2)    | 80.4(8)   |
| C11  | -1121(2)    | 5571.6(13) | 3967.3(18) | 64.5(6)   |
| C12  | -547.6(15)  | 5652.0(10) | 3416.6(15) | 48.2(5)   |
| C13  | 764.4(17)   | 4777.3(11) | 3767.5(14) | 49.9(5)   |
| C14  | 1746.9(19)  | 4661.2(13) | 4005.3(17) | 63.4(6)   |
| C15  | 2091(3)     | 4010.5(16) | 4002(2)    | 86.6(9)   |
| C16  | 1467(3)     | 3465.2(15) | 3749(2)    | 91.9(10)  |
| C17  | 494(3)      | 3572.4(13) | 3502(2)    | 79.0(8)   |
| C18  | 136(2)      | 4219.5(12) | 3512.0(16) | 61.9(6)   |
| C19  | -178.1(15)  | 5620.1(11) | 1349.1(13) | 46.7(4)   |
| C20  | 589.0(19)   | 5776.7(13) | 1156(2)    | 66.3(7)   |
| C21  | 1187.3(19)  | 5260.1(14) | 1134(2)    | 74.8(8)   |
| C22  | 1020.6(18)  | 4593.6(13) | 1303.7(16) | 60.3(6)   |
| C23  | 233(2)      | 4439.8(13) | 1459.4(18) | 66.6(6)   |
| C24  | -378.2(19)  | 4952.8(12) | 1474.2(16) | 59.6(6)   |
| C25  | 1724(2)     | 4045.5(18) | 1345(2)    | 84.3(9)   |
| F1   | 2089.7(17)  | 4150.6(12) | 760.2(16)  | 115.7(7)  |
| F2   | 1341.5(18)  | 3440.2(10) | 1161.4(18) | 124.2(8)  |
| F3   | 2488.3(17)  | 4029.6(16) | 2121.0(16) | 156.4(13) |
| N1   | -385.7(12)  | 6584.3(9)  | 2447.4(11) | 45.6(4)   |
| N2   | 454.7(14)   | 5441.6(9)  | 3794.3(14) | 58.5(5)   |
| O1   | 923.3(11)   | 7084.0(8)  | 2302.3(10) | 55.4(4)   |

|      |             |            |            |           |
|------|-------------|------------|------------|-----------|
| O2   | -942.4(13)  | 6823.6(9)  | 840.0(11)  | 64.0(4)   |
| O3   | -1828.6(11) | 5985.7(9)  | 1312.0(12) | 64.3(4)   |
| S1   | -936.4(4)   | 6283.4(3)  | 1406.9(3)  | 48.65(15) |
| C1'  | 5446.1(15)  | 6856.6(10) | 2357.4(15) | 46.7(5)   |
| C2'  | 5685.1(15)  | 7135.7(10) | 3241.7(15) | 48.4(5)   |
| C3'  | 6427.4(18)  | 7588.7(12) | 3731.0(18) | 62.7(6)   |
| C4'  | 6502(2)     | 7803.6(14) | 4541.8(19) | 72.1(7)   |
| C5'  | 5843(2)     | 7571.2(13) | 4843.0(18) | 68.5(7)   |
| C6'  | 5104.1(19)  | 7119.8(12) | 4352.3(16) | 59.4(6)   |
| C7'  | 5032.4(15)  | 6892.6(10) | 3541.6(14) | 45.3(4)   |
| C8'  | 4299.0(14)  | 6409.7(10) | 2870.2(13) | 42.7(4)   |
| C9'  | 3235.5(15)  | 6605.0(11) | 2643.0(16) | 52.9(5)   |
| C10' | 3011.5(19)  | 6231.5(15) | 3339.2(18) | 67.9(7)   |
| C11' | 3829.8(17)  | 5709.2(13) | 3802.9(16) | 57.8(5)   |
| C12' | 4373.9(14)  | 5670.5(10) | 3219.7(14) | 44.8(4)   |
| C13' | 5579.4(16)  | 4725.5(10) | 3743.4(13) | 47.0(5)   |
| C14' | 4864.6(18)  | 4226.7(11) | 3553.7(16) | 56.7(5)   |
| C15' | 5125(2)     | 3543.0(12) | 3668.6(18) | 70.6(7)   |
| C16' | 6073(3)     | 3345.8(13) | 3980(2)    | 82.3(9)   |
| C17' | 6785(2)     | 3832.9(14) | 4167(2)    | 76.8(8)   |
| C18' | 6544.2(18)  | 4520.7(12) | 4046.0(16) | 59.5(6)   |
| C19' | 4929.3(16)  | 5394.3(11) | 1249.0(14) | 48.3(5)   |
| C20' | 5712.0(19)  | 5532.1(12) | 1064.5(19) | 63.2(6)   |
| C21' | 6386.9(19)  | 5025.0(13) | 1196(2)    | 67.3(7)   |
| C22' | 6281.7(16)  | 4392.2(12) | 1508.9(16) | 55.7(5)   |
| C23' | 5472.7(18)  | 4252.7(12) | 1652.2(17) | 58.5(6)   |
| C24' | 4794.2(17)  | 4753.8(11) | 1520.3(15) | 53.7(5)   |
| C25' | 7064(2)     | 3862.0(15) | 1737(2)    | 71.1(7)   |
| F1'  | 7639.9(16)  | 3854.2(16) | 2604.3(15) | 139.4(10) |
| F2'  | 7648.1(14)  | 3975.2(9)  | 1351.1(17) | 105.7(7)  |
| F3'  | 6725.0(13)  | 3241.1(8)  | 1502.0(14) | 89.1(5)   |
| N1'  | 4588.9(12)  | 6470.7(8)  | 2121.5(11) | 44.2(4)   |
| N2'  | 5357.9(13)  | 5418.6(9)  | 3617.5(13) | 51.7(4)   |
| O1'  | 5878.4(12)  | 6935.2(8)  | 1908.1(12) | 59.2(4)   |
| O2'  | 4057.9(14)  | 6522.9(9)  | 486.4(11)  | 67.7(5)   |
| O3'  | 3223.4(11)  | 5747.5(9)  | 1093.3(11) | 61.1(4)   |
| S1'  | 4093.8(4)   | 6055.7(3)  | 1149.7(3)  | 49.46(15) |

**Table S12 Anisotropic Displacement Parameters ( $\text{\AA}^2 \times 10^3$ ) for 3f. The Anisotropic displacement factor exponent takes the form:  $-2\pi^2[h^2a^{*2}U_{11}+2hka^*b^*U_{12}+\dots]$ .**



| Atom | U <sub>11</sub> | U <sub>22</sub> | U <sub>33</sub> | U <sub>23</sub> | U <sub>13</sub> | U <sub>12</sub> |
|------|-----------------|-----------------|-----------------|-----------------|-----------------|-----------------|
| C1   | 47.3(11)        | 38.8(9)         | 52.7(11)        | 8.5(8)          | 25.8(9)         | 3.7(8)          |
| C2   | 50.3(11)        | 36.9(9)         | 51.7(11)        | 3.2(8)          | 26.4(9)         | 2.6(8)          |
| C3   | 61.4(13)        | 42.7(11)        | 67.9(14)        | -3.3(10)        | 31.5(11)        | -6.1(9)         |
| C4   | 76.1(16)        | 51.9(13)        | 66.8(15)        | -16.7(11)       | 29.5(13)        | -8.6(11)        |
| C5   | 93.1(19)        | 57.8(14)        | 61.9(15)        | -16.4(12)       | 40.9(14)        | -1.9(13)        |
| C6   | 80.2(16)        | 56.5(13)        | 64.9(14)        | -9.1(11)        | 47.6(13)        | -5.3(12)        |
| C7   | 54.5(12)        | 38.6(10)        | 56.1(12)        | 0.1(9)          | 31.2(10)        | 3.9(8)          |
| C8   | 49.5(11)        | 46.4(10)        | 51.2(11)        | 2.4(9)          | 30.3(9)         | 0.4(8)          |
| C9   | 53.0(13)        | 68.1(14)        | 75.9(16)        | 1.7(12)         | 39.4(12)        | 3.7(11)         |
| C10  | 68.4(17)        | 96(2)           | 100(2)          | 11.7(17)        | 57.7(17)        | -2.3(15)        |
| C11  | 76.7(16)        | 64.7(14)        | 64.3(15)        | 2.1(12)         | 42.1(13)        | -15.6(12)       |
| C12  | 49.6(11)        | 46.0(11)        | 51.5(11)        | 0.4(9)          | 24.5(9)         | -7.6(9)         |
| C13  | 61.6(13)        | 42.1(10)        | 45.6(11)        | 5.1(8)          | 23.1(10)        | -2.6(9)         |
| C14  | 65.9(15)        | 53.4(13)        | 68.8(15)        | 4.1(11)         | 27.8(12)        | -0.3(11)        |
| C15  | 88(2)           | 70.8(18)        | 104(2)          | 10.9(17)        | 44.9(19)        | 20.4(16)        |
| C16  | 128(3)          | 51.9(15)        | 105(2)          | 7.1(15)         | 59(2)           | 17.3(17)        |
| C17  | 121(3)          | 44.2(13)        | 75.9(18)        | -3.6(12)        | 47.4(18)        | -16.7(15)       |
| C18  | 77.0(16)        | 49.6(12)        | 59.8(14)        | -0.3(10)        | 30.6(12)        | -11.7(11)       |
| C19  | 47.7(11)        | 49.4(11)        | 42.7(10)        | -3.7(8)         | 19.8(9)         | -3.3(9)         |
| C20  | 67.7(15)        | 53.7(13)        | 92.3(19)        | -12.6(12)       | 48.8(14)        | -14.6(11)       |
| C21  | 57.1(14)        | 71.7(16)        | 107(2)          | -29.8(16)       | 46.6(15)        | -15.7(12)       |
| C22  | 57.1(13)        | 61.4(14)        | 52.9(13)        | -18.1(11)       | 15.5(10)        | 1.1(11)         |
| C23  | 89.0(18)        | 52.9(13)        | 66.2(15)        | -0.3(11)        | 41.7(14)        | 0.4(12)         |
| C24  | 72.3(15)        | 53.5(12)        | 65.6(14)        | -4.4(11)        | 41.7(12)        | -8.5(11)        |
| C25  | 74.8(18)        | 93(2)           | 72.5(18)        | -25.3(16)       | 20.9(15)        | 19.0(16)        |
| F1   | 117.8(16)       | 116.9(16)       | 133.0(18)       | -30.8(14)       | 73.9(15)        | 21.0(13)        |
| F2   | 130.3(18)       | 70.3(12)        | 176(2)          | -21.0(13)       | 71.4(17)        | 17.7(12)        |
| F3   | 109.8(17)       | 203(3)          | 97.5(16)        | -41.5(17)       | -8.0(13)        | 83.7(18)        |
| N1   | 45.3(9)         | 48.9(9)         | 46.7(9)         | 3.0(7)          | 24.1(7)         | -1.0(7)         |
| N2   | 54.2(11)        | 40.9(9)         | 73.4(13)        | -2.6(9)         | 21.8(9)         | -6.7(8)         |
| O1   | 58.1(9)         | 61.6(9)         | 55.8(9)         | 8.3(7)          | 33.6(7)         | -5.7(7)         |
| O2   | 75.0(11)        | 61.1(10)        | 49.9(9)         | 12.3(7)         | 22.0(8)         | 8.0(8)          |
| O3   | 44.3(8)         | 78.2(11)        | 65.8(10)        | -4.8(8)         | 20.0(7)         | -4.1(7)         |
| S1   | 44.9(3)         | 52.9(3)         | 45.6(3)         | 3.3(2)          | 17.4(2)         | 1.3(2)          |
| C1'  | 49.2(11)        | 36.8(9)         | 58.6(12)        | 5.0(9)          | 27.8(10)        | 2.7(8)          |
| C2'  | 47.7(11)        | 38.7(10)        | 59.0(12)        | -1.6(9)         | 23.6(10)        | 0.8(8)          |
| C3'  | 55.7(13)        | 52.6(13)        | 78.5(17)        | -8.6(12)        | 28.4(12)        | -9.8(10)        |
| C4'  | 66.8(15)        | 59.4(14)        | 75.8(17)        | -17.5(13)       | 18.3(13)        | -11.9(12)       |
| C5'  | 81.2(17)        | 61.1(14)        | 56.1(14)        | -13.7(11)       | 23.7(13)        | -3.1(13)        |

|      |          |          |           |           |          |           |
|------|----------|----------|-----------|-----------|----------|-----------|
| C6'  | 68.9(15) | 56.2(13) | 57.1(13)  | -4.1(10)  | 31.4(12) | -1.8(11)  |
| C7'  | 47.3(11) | 37.0(9)  | 50.6(11)  | 0.9(8)    | 20.6(9)  | 3.7(8)    |
| C8'  | 45.6(10) | 40.5(10) | 44.8(10)  | 0.6(8)    | 22.4(9)  | 1.0(8)    |
| C9'  | 47.6(11) | 51.0(11) | 61.1(13)  | 1.3(10)   | 24.9(10) | 7.0(9)    |
| C10' | 55.9(14) | 90.4(19) | 66.2(15)  | 6.5(13)   | 34.8(12) | 8.2(13)   |
| C11' | 59.5(13) | 61.8(13) | 61.1(14)  | 6.2(11)   | 34.8(11) | -4.0(11)  |
| C12' | 44.1(10) | 40.9(10) | 50.0(11)  | 1.9(8)    | 21.2(9)  | -2.3(8)   |
| C13' | 54.7(12) | 40.8(10) | 44.4(11)  | 4.5(8)    | 20.6(9)  | 0.2(9)    |
| C14' | 63.9(14) | 47.4(11) | 55.1(13)  | 3.5(10)   | 22.7(11) | -5.8(10)  |
| C15' | 96(2)    | 44.4(12) | 67.5(16)  | 0.2(11)   | 32.2(15) | -12.0(13) |
| C16' | 112(2)   | 42.9(13) | 82.7(19)  | 9.4(13)   | 34.4(18) | 14.7(14)  |
| C17' | 82.2(19) | 58.0(15) | 82.6(19)  | 10.6(13)  | 29.3(15) | 20.6(14)  |
| C18' | 60.3(13) | 52.2(12) | 62.5(14)  | 7.0(10)   | 23.8(11) | 5.2(10)   |
| C19' | 54.2(12) | 46.3(11) | 48.3(11)  | -8.2(9)   | 26.1(10) | -4.6(9)   |
| C20' | 76.1(16) | 46.6(12) | 85.3(17)  | -7.8(11)  | 52.3(14) | -9.7(11)  |
| C21' | 64.5(15) | 57.7(13) | 99(2)     | -21.7(13) | 53.1(15) | -16.0(11) |
| C22' | 51.3(12) | 52.4(12) | 62.1(13)  | -16.3(10) | 23.9(10) | -6.4(10)  |
| C23' | 64.2(14) | 47.5(11) | 68.8(15)  | -2.1(10)  | 33.9(12) | -3.0(10)  |
| C24' | 56.4(12) | 52.2(12) | 60.5(13)  | -4.0(10)  | 33.0(11) | -5.5(10)  |
| C25' | 56.6(14) | 72.1(16) | 79.7(18)  | -18.9(14) | 25.4(13) | -2.2(12)  |
| F1'  | 92.5(14) | 193(3)   | 93.0(15)  | -30.0(15) | 4.2(11)  | 56.7(15)  |
| F2'  | 89.0(12) | 74.6(11) | 186(2)    | -16.9(12) | 89.9(15) | 1.7(9)    |
| F3'  | 87.0(11) | 54.7(8)  | 129.1(15) | 3.9(9)    | 50.6(11) | 8.8(8)    |
| N1'  | 50.3(9)  | 39.3(8)  | 46.1(9)   | 0.7(7)    | 24.2(8)  | -0.3(7)   |
| N2'  | 45.1(9)  | 38.2(8)  | 67.2(11)  | 4.0(8)    | 20.4(8)  | -2.7(7)   |
| O1'  | 66.0(10) | 54.0(9)  | 71.8(10)  | 1.0(8)    | 43.3(9)  | -5.5(7)   |
| O2'  | 85.2(12) | 67.1(10) | 49.3(9)   | 8.9(8)    | 28.2(8)  | 8.1(9)    |
| O3'  | 48.4(8)  | 68.6(10) | 61.9(10)  | -11.1(8)  | 20.3(7)  | -4.3(7)   |
| S1'  | 51.8(3)  | 49.9(3)  | 45.5(3)   | -0.4(2)   | 20.3(2)  | 1.5(2)    |

**Table S13 Bond Lengths for 3f.**

| Atom | Atom | Length/Å | Atom | Atom | Length/Å |
|------|------|----------|------|------|----------|
| C1   | C2   | 1.468(3) | C1'  | C2'  | 1.466(3) |
| C1   | N1   | 1.408(3) | C1'  | N1'  | 1.408(3) |
| C1   | O1   | 1.206(2) | C1'  | O1'  | 1.208(3) |
| C2   | C3   | 1.385(3) | C2'  | C3'  | 1.387(3) |
| C2   | C7   | 1.383(3) | C2'  | C7'  | 1.381(3) |
| C3   | C4   | 1.375(4) | C3'  | C4'  | 1.377(4) |
| C4   | C5   | 1.383(4) | C4'  | C5'  | 1.385(4) |
| C5   | C6   | 1.380(4) | C5'  | C6'  | 1.383(4) |

|     |     |            |      |      |            |
|-----|-----|------------|------|------|------------|
| C6  | C7  | 1.387(3)   | C6'  | C7'  | 1.386(3)   |
| C7  | C8  | 1.510(3)   | C7'  | C8'  | 1.517(3)   |
| C8  | C9  | 1.540(3)   | C8'  | C9'  | 1.542(3)   |
| C8  | C12 | 1.549(3)   | C8'  | C12' | 1.547(3)   |
| C8  | N1  | 1.506(2)   | C8'  | N1'  | 1.506(2)   |
| C9  | C10 | 1.529(4)   | C9'  | C10' | 1.536(3)   |
| C10 | C11 | 1.513(4)   | C10' | C11' | 1.534(4)   |
| C11 | C12 | 1.532(3)   | C11' | C12' | 1.536(3)   |
| C12 | N2  | 1.434(3)   | C12' | N2'  | 1.435(3)   |
| C13 | C14 | 1.389(3)   | C13' | C14' | 1.392(3)   |
| C13 | C18 | 1.391(3)   | C13' | C18' | 1.388(3)   |
| C13 | N2  | 1.391(3)   | C13' | N2'  | 1.392(3)   |
| C14 | C15 | 1.379(4)   | C14' | C15' | 1.385(3)   |
| C15 | C16 | 1.368(5)   | C15' | C16' | 1.359(4)   |
| C16 | C17 | 1.369(5)   | C16' | C17' | 1.374(4)   |
| C17 | C18 | 1.383(4)   | C17' | C18' | 1.387(3)   |
| C19 | C20 | 1.378(3)   | C19' | C20' | 1.385(3)   |
| C19 | C24 | 1.379(3)   | C19' | C24' | 1.380(3)   |
| C19 | S1  | 1.770(2)   | C19' | S1'  | 1.772(2)   |
| C20 | C21 | 1.373(4)   | C20' | C21' | 1.376(4)   |
| C21 | C22 | 1.383(4)   | C21' | C22' | 1.382(4)   |
| C22 | C23 | 1.369(4)   | C22' | C23' | 1.383(3)   |
| C22 | C25 | 1.497(4)   | C22' | C25' | 1.499(4)   |
| C23 | C24 | 1.378(4)   | C23' | C24' | 1.372(3)   |
| C25 | F1  | 1.339(4)   | C25' | F1'  | 1.325(4)   |
| C25 | F2  | 1.297(4)   | C25' | F2'  | 1.329(3)   |
| C25 | F3  | 1.309(4)   | C25' | F3'  | 1.312(3)   |
| N1  | S1  | 1.6733(18) | N1'  | S1'  | 1.6723(17) |
| O2  | S1  | 1.4184(17) | O2'  | S1'  | 1.4211(17) |
| O3  | S1  | 1.4233(17) | O3'  | S1'  | 1.4229(17) |

**Table S14 Bond Angles for 3f.**

| Atom | Atom | Atom | Angle/°    | Atom | Atom | Atom | Angle/°    |
|------|------|------|------------|------|------|------|------------|
| N1   | C1   | C2   | 105.57(16) | N1'  | C1'  | C2'  | 105.73(17) |
| O1   | C1   | C2   | 128.6(2)   | O1'  | C1'  | C2'  | 128.3(2)   |
| O1   | C1   | N1   | 125.9(2)   | O1'  | C1'  | N1'  | 126.0(2)   |
| C3   | C2   | C1   | 128.09(19) | C3'  | C2'  | C1'  | 127.6(2)   |
| C7   | C2   | C1   | 109.44(18) | C7'  | C2'  | C1'  | 109.87(18) |
| C7   | C2   | C3   | 122.4(2)   | C7'  | C2'  | C3'  | 122.5(2)   |
| C4   | C3   | C2   | 118.0(2)   | C4'  | C3'  | C2'  | 118.0(2)   |

|     |     |     |            |      |      |      |            |
|-----|-----|-----|------------|------|------|------|------------|
| C3  | C4  | C5  | 120.2(2)   | C3'  | C4'  | C5'  | 120.0(2)   |
| C6  | C5  | C4  | 121.6(2)   | C6'  | C5'  | C4'  | 121.7(2)   |
| C5  | C6  | C7  | 118.7(2)   | C5'  | C6'  | C7'  | 118.7(2)   |
| C2  | C7  | C6  | 119.0(2)   | C2'  | C7'  | C6'  | 119.1(2)   |
| C2  | C7  | C8  | 111.54(18) | C2'  | C7'  | C8'  | 111.07(18) |
| C6  | C7  | C8  | 129.5(2)   | C6'  | C7'  | C8'  | 129.8(2)   |
| C7  | C8  | C9  | 112.41(18) | C7'  | C8'  | C9'  | 112.38(17) |
| C7  | C8  | C12 | 112.71(17) | C7'  | C8'  | C12' | 113.29(16) |
| C9  | C8  | C12 | 104.19(17) | C9'  | C8'  | C12' | 102.71(16) |
| N1  | C8  | C7  | 99.84(16)  | N1'  | C8'  | C7'  | 100.17(15) |
| N1  | C8  | C9  | 116.57(18) | N1'  | C8'  | C9'  | 115.90(17) |
| N1  | C8  | C12 | 111.48(16) | N1'  | C8'  | C12' | 112.90(15) |
| C10 | C9  | C8  | 105.3(2)   | C10' | C9'  | C8'  | 104.80(18) |
| C11 | C10 | C9  | 108.0(2)   | C11' | C10' | C9'  | 107.37(18) |
| C10 | C11 | C12 | 104.5(2)   | C10' | C11' | C12' | 104.93(18) |
| C11 | C12 | C8  | 102.61(17) | C11' | C12' | C8'  | 102.92(16) |
| N2  | C12 | C8  | 111.67(16) | N2'  | C12' | C8'  | 112.67(16) |
| N2  | C12 | C11 | 119.0(2)   | N2'  | C12' | C11' | 117.96(18) |
| C14 | C13 | C18 | 118.0(2)   | C18' | C13' | C14' | 118.6(2)   |
| C14 | C13 | N2  | 118.8(2)   | C18' | C13' | N2'  | 119.0(2)   |
| C18 | C13 | N2  | 123.1(2)   | N2'  | C13' | C14' | 122.4(2)   |
| C15 | C14 | C13 | 121.0(3)   | C15' | C14' | C13' | 119.9(2)   |
| C16 | C15 | C14 | 120.6(3)   | C16' | C15' | C14' | 121.3(3)   |
| C15 | C16 | C17 | 119.2(3)   | C15' | C16' | C17' | 119.4(2)   |
| C16 | C17 | C18 | 121.2(3)   | C16' | C17' | C18' | 120.6(3)   |
| C17 | C18 | C13 | 120.1(3)   | C17' | C18' | C13' | 120.2(2)   |
| C20 | C19 | C24 | 120.9(2)   | C20' | C19' | S1'  | 119.42(17) |
| C20 | C19 | S1  | 119.47(17) | C24' | C19' | C20' | 121.2(2)   |
| C24 | C19 | S1  | 119.58(17) | C24' | C19' | S1'  | 119.33(17) |
| C21 | C20 | C19 | 119.0(2)   | C21' | C20' | C19' | 118.8(2)   |
| C20 | C21 | C22 | 120.4(2)   | C20' | C21' | C22' | 120.3(2)   |
| C21 | C22 | C25 | 119.6(3)   | C21' | C22' | C23' | 120.3(2)   |
| C23 | C22 | C21 | 120.2(2)   | C21' | C22' | C25' | 120.4(2)   |
| C23 | C22 | C25 | 120.2(3)   | C23' | C22' | C25' | 119.3(2)   |
| C22 | C23 | C24 | 120.0(2)   | C24' | C23' | C22' | 119.9(2)   |
| C23 | C24 | C19 | 119.4(2)   | C23' | C24' | C19' | 119.5(2)   |
| F1  | C25 | C22 | 112.1(3)   | F1'  | C25' | C22' | 110.9(2)   |
| F2  | C25 | C22 | 113.9(3)   | F1'  | C25' | F2'  | 105.8(3)   |
| F2  | C25 | F1  | 104.8(2)   | F2'  | C25' | C22' | 112.9(3)   |
| F2  | C25 | F3  | 109.0(3)   | F3'  | C25' | C22' | 113.7(2)   |

|     |     |     |            |      |      |      |            |
|-----|-----|-----|------------|------|------|------|------------|
| F3  | C25 | C22 | 111.7(2)   | F3'  | C25' | F1'  | 107.6(3)   |
| F3  | C25 | F1  | 104.7(3)   | F3'  | C25' | F2'  | 105.5(2)   |
| C1  | N1  | C8  | 112.77(16) | C1'  | N1'  | C8'  | 112.67(16) |
| C1  | N1  | S1  | 120.55(14) | C1'  | N1'  | S1'  | 119.99(14) |
| C8  | N1  | S1  | 126.18(14) | C8'  | N1'  | S1'  | 126.80(13) |
| C13 | N2  | C12 | 124.45(19) | C13' | N2'  | C12' | 122.68(17) |
| N1  | S1  | C19 | 105.94(9)  | N1'  | S1'  | C19' | 105.40(9)  |
| O2  | S1  | C19 | 108.83(10) | O2'  | S1'  | C19' | 108.83(11) |
| O2  | S1  | N1  | 106.65(10) | O2'  | S1'  | N1'  | 107.05(10) |
| O2  | S1  | O3  | 120.41(11) | O2'  | S1'  | O3'  | 120.46(11) |
| O3  | S1  | C19 | 107.99(10) | O3'  | S1'  | C19' | 107.90(10) |
| O3  | S1  | N1  | 106.12(9)  | O3'  | S1'  | N1'  | 106.22(9)  |

**Table S15 Torsion Angles for 3f.**

| A  | B  | C   | D   | Angle/°     | A   | B   | C    | D    | Angle/°     |
|----|----|-----|-----|-------------|-----|-----|------|------|-------------|
| C1 | C2 | C3  | C4  | 176.7(2)    | C1' | C2' | C3'  | C4'  | 177.9(2)    |
| C1 | C2 | C7  | C6  | -176.6(2)   | C1' | C2' | C7'  | C6'  | -177.16(19) |
| C1 | C2 | C7  | C8  | 2.5(2)      | C1' | C2' | C7'  | C8'  | 1.0(2)      |
| C1 | N1 | S1  | C19 | 69.81(17)   | C1' | N1' | S1'  | C19' | 68.42(16)   |
| C1 | N1 | S1  | O2  | -46.02(18)  | C1' | N1' | S1'  | O2'  | -47.34(18)  |
| C1 | N1 | S1  | O3  | -175.55(15) | C1' | N1' | S1'  | O3'  | -177.25(15) |
| C2 | C1 | N1  | C8  | -8.4(2)     | C2' | C1' | N1'  | C8'  | -6.8(2)     |
| C2 | C1 | N1  | S1  | 179.23(13)  | C2' | C1' | N1'  | S1'  | -178.93(13) |
| C2 | C3 | C4  | C5  | -0.1(4)     | C2' | C3' | C4'  | C5'  | -0.5(4)     |
| C2 | C7 | C8  | C9  | -131.22(19) | C2' | C7' | C8'  | C9'  | -128.36(19) |
| C2 | C7 | C8  | C12 | 111.40(19)  | C2' | C7' | C8'  | C12' | 115.77(19)  |
| C2 | C7 | C8  | N1  | -7.0(2)     | C2' | C7' | C8'  | N1'  | -4.7(2)     |
| C3 | C2 | C7  | C6  | 1.0(3)      | C3' | C2' | C7'  | C6'  | 1.5(3)      |
| C3 | C2 | C7  | C8  | -179.83(19) | C3' | C2' | C7'  | C8'  | 179.7(2)    |
| C3 | C4 | C5  | C6  | -0.1(4)     | C3' | C4' | C5'  | C6'  | 0.5(4)      |
| C4 | C5 | C6  | C7  | 0.7(4)      | C4' | C5' | C6'  | C7'  | 0.5(4)      |
| C5 | C6 | C7  | C2  | -1.2(3)     | C5' | C6' | C7'  | C2'  | -1.5(3)     |
| C5 | C6 | C7  | C8  | 179.9(2)    | C5' | C6' | C7'  | C8'  | -179.3(2)   |
| C6 | C7 | C8  | C9  | 47.8(3)     | C6' | C7' | C8'  | C9'  | 49.6(3)     |
| C6 | C7 | C8  | C12 | -69.6(3)    | C6' | C7' | C8'  | C12' | -66.3(3)    |
| C6 | C7 | C8  | N1  | 172.0(2)    | C6' | C7' | C8'  | N1'  | 173.2(2)    |
| C7 | C2 | C3  | C4  | -0.4(3)     | C7' | C2' | C3'  | C4'  | -0.5(4)     |
| C7 | C8 | C9  | C10 | -97.8(2)    | C7' | C8' | C9'  | C10' | -88.4(2)    |
| C7 | C8 | C12 | C11 | 84.1(2)     | C7' | C8' | C12' | C11' | 79.6(2)     |
| C7 | C8 | C12 | N2  | -44.4(2)    | C7' | C8' | C12' | N2'  | -48.5(2)    |

|              |             |                  |             |
|--------------|-------------|------------------|-------------|
| C7 C8 N1 C1  | 9.4(2)      | C7' C8' N1' C1'  | 7.1(2)      |
| C7 C8 N1 S1  | -178.74(14) | C7' C8' N1' S1'  | 178.57(13)  |
| C8 C9 C10C11 | -1.6(3)     | C8' C9' C10'C11' | -12.9(3)    |
| C8 C12N2 C13 | -155.5(2)   | C8' C12'N2' C13' | -160.99(19) |
| C8 N1 S1 C19 | -101.45(17) | C8' N1' S1' C19' | -102.49(17) |
| C8 N1 S1 O2  | 142.72(17)  | C8' N1' S1' O2'  | 141.74(16)  |
| C8 N1 S1 O3  | 13.19(19)   | C8' N1' S1' O3'  | 11.84(19)   |
| C9 C8 C12C11 | -38.0(2)    | C9' C8' C12'C11' | -41.9(2)    |
| C9 C8 C12N2  | -166.59(19) | C9' C8' C12'N2'  | -169.97(18) |
| C9 C8 N1 C1  | 130.7(2)    | C9' C8' N1' C1'  | 128.23(18)  |
| C9 C8 N1 S1  | -57.4(2)    | C9' C8' N1' S1'  | -60.3(2)    |
| C9 C10C11C12 | -22.3(3)    | C9' C10'C11'C12' | -13.1(3)    |
| C10C11C12C8  | 37.0(3)     | C10'C11'C12'C8'  | 33.9(2)     |
| C10C11C12N2  | 160.8(2)    | C10'C11'C12'N2'  | 158.6(2)    |
| C11C12N2 C13 | 85.3(3)     | C11'C12'N2' C13' | 79.3(3)     |
| C12C8 C9 C10 | 24.5(3)     | C12'C8' C9' C10' | 33.7(2)     |
| C12C8 N1 C1  | -109.87(19) | C12'C8' N1' C1'  | -113.69(18) |
| C12C8 N1 S1  | 62.0(2)     | C12'C8' N1' S1'  | 57.8(2)     |
| C13C14C15C16 | 1.1(5)      | C13'C14'C15'C16' | 1.1(4)      |
| C14C13C18C17 | 0.1(4)      | C14'C13'C18'C17' | -0.9(4)     |
| C14C13N2 C12 | 168.0(2)    | C14'C13'N2' C12' | -4.9(3)     |
| C14C15C16C17 | -0.3(5)     | C14'C15'C16'C17' | -1.3(5)     |
| C15C16C17C18 | -0.6(5)     | C15'C16'C17'C18' | 0.4(5)      |
| C16C17C18C13 | 0.7(4)      | C16'C17'C18'C13' | 0.8(4)      |
| C18C13C14C15 | -1.0(4)     | C18'C13'C14'C15' | 0.0(3)      |
| C18C13N2 C12 | -11.9(4)    | C18'C13'N2' C12' | 173.3(2)    |
| C19C20C21C22 | 0.0(4)      | C19'C20'C21'C22' | -0.2(4)     |
| C20C19C24C23 | 4.0(4)      | C20'C19'C24'C23' | 3.2(4)      |
| C20C19S1 N1  | -86.0(2)    | C20'C19'S1' N1'  | -85.0(2)    |
| C20C19S1 O2  | 28.3(2)     | C20'C19'S1' O2'  | 29.5(2)     |
| C20C19S1 O3  | 160.6(2)    | C20'C19'S1' O3'  | 161.79(19)  |
| C20C21C22C23 | 2.7(4)      | C20'C21'C22'C23' | 3.1(4)      |
| C20C21C22C25 | -175.4(3)   | C20'C21'C22'C25' | -174.0(2)   |
| C21C22C23C24 | -2.0(4)     | C21'C22'C23'C24' | -2.9(4)     |
| C21C22C25F1  | -35.7(4)    | C21'C22'C25'F1'  | 98.1(3)     |
| C21C22C25F2  | -154.5(3)   | C21'C22'C25'F2'  | -20.4(4)    |
| C21C22C25F3  | 81.5(4)     | C21'C22'C25'F3'  | -140.6(3)   |
| C22C23C24C19 | -1.3(4)     | C22'C23'C24'C19' | -0.3(4)     |
| C23C22C25F1  | 146.2(3)    | C23'C22'C25'F1'  | -79.0(3)    |
| C23C22C25F2  | 27.4(4)     | C23'C22'C25'F2'  | 162.5(2)    |

|                 |             |                     |             |
|-----------------|-------------|---------------------|-------------|
| C23 C22 C25 F3  | -96.6(4)    | C23' C22' C25' F3'  | 42.3(4)     |
| C24 C19 C20 C21 | -3.3(4)     | C24' C19' C20' C21' | -3.0(4)     |
| C24 C19 S1 N1   | 95.71(19)   | C24' C19' S1' N1'   | 94.11(19)   |
| C24 C19 S1 O2   | -149.95(19) | C24' C19' S1' O2'   | -151.36(18) |
| C24 C19 S1 O3   | -17.6(2)    | C24' C19' S1' O3'   | -19.1(2)    |
| C25 C22 C23 C24 | 176.0(2)    | C25' C22' C23' C24' | 174.3(2)    |
| N1 C1 C2 C3     | -173.9(2)   | N1' C1' C2' C3'     | -175.1(2)   |
| N1 C1 C2 C7     | 3.5(2)      | N1' C1' C2' C7'     | 3.5(2)      |
| N1 C8 C9 C10    | 147.8(2)    | N1' C8' C9' C10'    | 157.27(19)  |
| N1 C8 C12 C11   | -164.56(18) | N1' C8' C12' C11'   | -167.42(17) |
| N1 C8 C12 N2    | 66.9(2)     | N1' C8' C12' N2'    | 64.5(2)     |
| N2 C13 C14 C15  | 179.0(3)    | N2' C13' C14' C15'  | 178.2(2)    |
| N2 C13 C18 C17  | -179.9(2)   | N2' C13' C18' C17'  | -179.2(2)   |
| O1 C1 C2 C3     | 6.1(4)      | O1' C1' C2' C3'     | 4.6(4)      |
| O1 C1 C2 C7     | -176.5(2)   | O1' C1' C2' C7'     | -176.8(2)   |
| O1 C1 N1 C8     | 171.59(19)  | O1' C1' N1' C8'     | 173.46(19)  |
| O1 C1 N1 S1     | -0.8(3)     | O1' C1' N1' S1'     | 1.3(3)      |
| S1 C19 C20 C21  | 178.4(2)    | S1' C19' C20' C21'  | 176.1(2)    |
| S1 C19 C24 C23  | -177.77(19) | S1' C19' C24' C23'  | -175.89(18) |

**Table S16 Hydrogen Atom Coordinates ( $\text{\AA}\times 10^4$ ) and Isotropic Displacement Parameters ( $\text{\AA}^2\times 10^3$ ) for 3f.**

| Atom | <i>x</i> | <i>y</i> | <i>z</i> | U(eq) |
|------|----------|----------|----------|-------|
| H3   | 1948     | 7744     | 4039     | 67    |
| H4   | 2080     | 7970     | 5446     | 79    |
| H5   | 975      | 7508     | 5886     | 82    |
| H6   | -285     | 6821     | 4945     | 74    |
| H9A  | -1753    | 7045     | 3230     | 74    |
| H9B  | -2151    | 6566     | 2387     | 74    |
| H10A | -2128    | 6266     | 3981     | 97    |
| H10B | -2554    | 5797     | 3131     | 97    |
| H11A | -1339    | 5104     | 3949     | 77    |
| H11B | -723     | 5700     | 4582     | 77    |
| H12  | -898     | 5399     | 2860     | 58    |
| H14  | 2179     | 5028     | 4169     | 76    |
| H15  | 2753     | 3942     | 4173     | 104   |
| H16  | 1700     | 3027     | 3745     | 110   |
| H17  | 67       | 3203     | 3323     | 95    |
| H18  | -526     | 4282     | 3348     | 74    |
| H20  | 700      | 6225     | 1042     | 80    |

|      |      |      |      |    |
|------|------|------|------|----|
| H21  | 1707 | 5359 | 1004 | 90 |
| H23  | 111  | 3989 | 1555 | 80 |
| H24  | -921 | 4850 | 1568 | 72 |
| H2   | 894  | 5747 | 4055 | 70 |
| H3'  | 6862 | 7743 | 3518 | 75 |
| H4'  | 6996 | 8105 | 4887 | 87 |
| H5'  | 5899 | 7723 | 5390 | 82 |
| H6'  | 4664 | 6972 | 4562 | 71 |
| H9'A | 3172 | 7095 | 2684 | 63 |
| H9'B | 2796 | 6457 | 2047 | 63 |
| H10C | 2988 | 6554 | 3769 | 81 |
| H10D | 2385 | 6002 | 3054 | 81 |
| H11C | 3561 | 5267 | 3838 | 69 |
| H11D | 4264 | 5859 | 4400 | 69 |
| H12' | 3992 | 5377 | 2710 | 54 |
| H14' | 4213 | 4352 | 3350 | 68 |
| H15' | 4641 | 3213 | 3530 | 85 |
| H16' | 6238 | 2885 | 4065 | 99 |
| H17' | 7434 | 3700 | 4377 | 92 |
| H18' | 7031 | 4846 | 4168 | 71 |
| H20' | 5780 | 5959 | 856  | 76 |
| H21' | 6916 | 5109 | 1073 | 81 |
| H23' | 5389 | 3820 | 1838 | 70 |
| H24' | 4247 | 4663 | 1613 | 64 |
| H2'  | 5830 | 5708 | 3785 | 62 |

(2) Absolute configurations of **7** and **9** are determined by *X*-ray structure analysis of the product **7I**.

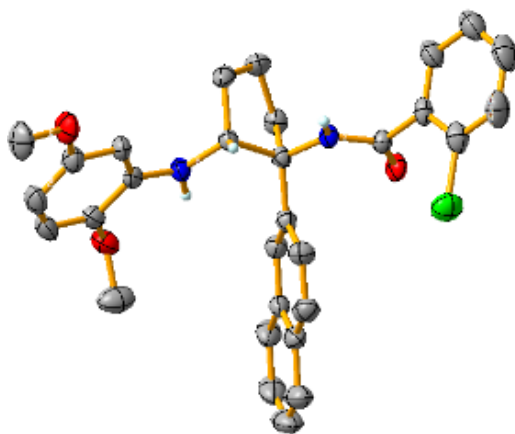

**Fig. S19.** Absolute configuration of **7I** (CCDC 2080353).



Displacement ellipsoids are drawn at the 30% probability level.

(Solvent: THF)

**Table S17 Crystal data and structure refinement for 7I.**

|                                             |                                                                 |
|---------------------------------------------|-----------------------------------------------------------------|
| Identification code                         | <b>7I</b>                                                       |
| Empirical formula                           | C <sub>30</sub> H <sub>29</sub> ClN <sub>2</sub> O <sub>3</sub> |
| Formula weight                              | 501.00                                                          |
| Temperature/K                               | 293(2)                                                          |
| Crystal system                              | orthorhombic                                                    |
| Space group                                 | P2 <sub>1</sub> 2 <sub>1</sub> 2 <sub>1</sub>                   |
| a/Å                                         | 12.3663(3)                                                      |
| b/Å                                         | 16.7129(3)                                                      |
| c/Å                                         | 25.3786(5)                                                      |
| α/°                                         | 90                                                              |
| β/°                                         | 90                                                              |
| γ/°                                         | 90                                                              |
| Volume/Å <sup>3</sup>                       | 5245.20(18)                                                     |
| Z                                           | 8                                                               |
| ρ <sub>calc</sub> /g/cm <sup>3</sup>        | 1.269                                                           |
| μ/mm <sup>-1</sup>                          | 1.558                                                           |
| F(000)                                      | 2112.0                                                          |
| Crystal size/mm <sup>3</sup>                | 0.16 × 0.09 × 0.06                                              |
| Radiation                                   | CuKα (λ = 1.54184)                                              |
| 2θ range for data collection/°              | 6.966 to 134.156                                                |
| Index ranges                                | -12 ≤ h ≤ 14, -19 ≤ k ≤ 12, -30 ≤ l ≤ 30                        |
| Reflections collected                       | 19920                                                           |
| Independent reflections                     | 9353 [R <sub>int</sub> = 0.0420, R <sub>sigma</sub> = 0.0626]   |
| Data/restraints/parameters                  | 9353/4/677                                                      |
| Goodness-of-fit on F <sup>2</sup>           | 1.022                                                           |
| Final R indexes [I ≥ 2σ (I)]                | R <sub>1</sub> = 0.0576, wR <sub>2</sub> = 0.1329               |
| Final R indexes [all data]                  | R <sub>1</sub> = 0.0870, wR <sub>2</sub> = 0.1549               |
| Largest diff. peak/hole / e Å <sup>-3</sup> | 0.20/-0.19                                                      |
| Flack parameter                             | -0.013(19)                                                      |

**Table S18 Fractional Atomic Coordinates (×10<sup>4</sup>) and Equivalent Isotropic Displacement Parameters (Å<sup>2</sup>×10<sup>3</sup>) for 7I. U<sub>eq</sub> is defined as 1/3 of the trace of the orthogonalised U<sub>ij</sub> tensor.**

| Atom | x       | y       | z       | U(eq)  |
|------|---------|---------|---------|--------|
| C1   | 4282(6) | 7083(5) | 3517(4) | 103(2) |
| C2   | 3745(7) | 7620(6) | 3812(4) | 122(3) |
| C3   | 4268(7) | 8098(6) | 4178(4) | 115(3) |
| C4   | 5364(6) | 8019(5) | 4247(3) | 96(2)  |

|      |            |            |            |          |
|------|------------|------------|------------|----------|
| C5   | 5959(5)    | 7467(4)    | 3953(2)    | 68.9(15) |
| C6   | 5421(5)    | 6992(4)    | 3579(3)    | 77.8(17) |
| C7   | 6018(5)    | 6430(4)    | 3283(3)    | 81.0(18) |
| C8   | 7106(5)    | 6354(3)    | 3356(2)    | 68.3(15) |
| C9   | 7666(4)    | 6829(3)    | 3730(2)    | 54.8(12) |
| C10  | 7097(5)    | 7372(3)    | 4012(2)    | 63.8(14) |
| C11  | 8886(4)    | 6699(3)    | 3798.5(19) | 51.6(11) |
| C12  | 9150(4)    | 5910(3)    | 4097.8(19) | 53.9(12) |
| C13  | 10355(5)   | 6006(3)    | 4247(2)    | 66.6(14) |
| C14  | 10594(5)   | 6911(4)    | 4230(3)    | 78.1(17) |
| C15  | 9502(5)    | 7316(3)    | 4126(2)    | 62.8(13) |
| C16  | 9385(4)    | 7190(3)    | 2912(2)    | 57.3(12) |
| C17  | 10074(5)   | 7036(3)    | 2435(2)    | 66.5(15) |
| C18  | 9668(7)    | 6797(4)    | 1957(3)    | 86.3(19) |
| C19  | 10319(9)   | 6711(5)    | 1519(3)    | 110(3)   |
| C20  | 11404(10)  | 6883(6)    | 1559(4)    | 121(3)   |
| C21  | 11842(8)   | 7105(5)    | 2023(4)    | 112(3)   |
| C22  | 11188(6)   | 7195(4)    | 2462(3)    | 90(2)    |
| C23  | 8268(4)    | 5112(3)    | 4796.7(19) | 58.7(13) |
| C24  | 7419(5)    | 5076(4)    | 5167(2)    | 68.1(15) |
| C25  | 7156(6)    | 4367(5)    | 5404(3)    | 89(2)    |
| C26  | 7718(6)    | 3675(5)    | 5292(3)    | 89(2)    |
| C27  | 8579(6)    | 3708(4)    | 4944(2)    | 78.3(17) |
| C28  | 8854(5)    | 4427(3)    | 4699(2)    | 66.0(14) |
| C29  | 5822(7)    | 5861(6)    | 5131(4)    | 128(3)   |
| C30  | 8933(8)    | 2300(4)    | 5003(3)    | 119(3)   |
| CI1  | 8330.4(19) | 6543.3(14) | 1906.2(9)  | 107.1(7) |
| CI1A | 11831(19)  | 7248(15)   | 2965(8)    | 107.1(7) |
| N1   | 9406(4)    | 6620(2)    | 3280.9(16) | 52.1(10) |
| N2   | 8471(4)    | 5841(3)    | 4559.4(18) | 64.6(12) |
| O1   | 8873(3)    | 7817(2)    | 2965.0(15) | 73.0(11) |
| O2   | 6902(4)    | 5797(3)    | 5282.7(19) | 90.6(13) |
| O3   | 9228(4)    | 3068(3)    | 4807(2)    | 98.7(15) |
| C1'  | 3186(5)    | 5470(5)    | 4642(2)    | 88(2)    |
| C2'  | 2966(7)    | 5449(6)    | 5172(3)    | 107(3)   |
| C3'  | 2352(8)    | 4844(8)    | 5385(3)    | 120(3)   |
| C4'  | 1940(7)    | 4252(6)    | 5075(3)    | 104(3)   |
| C5'  | 2137(5)    | 4251(4)    | 4523(2)    | 75.1(17) |
| C6'  | 2770(5)    | 4869(4)    | 4302(2)    | 67.7(15) |
| C7'  | 2905(4)    | 4891(4)    | 3754(2)    | 63.3(14) |

|      |          |            |            |          |
|------|----------|------------|------------|----------|
| C8'  | 2461(4)  | 4333(3)    | 3428(2)    | 56.7(12) |
| C9'  | 1862(5)  | 3707(3)    | 3660(2)    | 69.2(15) |
| C10' | 1707(6)  | 3665(4)    | 4181(3)    | 84.1(18) |
| C11' | 2513(4)  | 4388(3)    | 2826(2)    | 56.8(12) |
| C12' | 3278(5)  | 3769(3)    | 2555(2)    | 65.3(14) |
| C13' | 3371(6)  | 4091(4)    | 1993(2)    | 85.5(19) |
| C14' | 3157(7)  | 4996(4)    | 2023(3)    | 95(2)    |
| C15' | 2949(5)  | 5176(3)    | 2601(2)    | 69.1(15) |
| C16' | 574(4)   | 4694(3)    | 2717(2)    | 56.8(12) |
| C17' | -488(5)  | 4454(3)    | 2473(2)    | 65.7(14) |
| C18' | -685(5)  | 4409(4)    | 1938(2)    | 77.0(16) |
| C19' | -1698(7) | 4222(4)    | 1740(3)    | 97(2)    |
| C20' | -2534(6) | 4088(5)    | 2084(4)    | 105(2)   |
| C21' | -2364(6) | 4133(5)    | 2615(4)    | 101(2)   |
| C22' | -1348(6) | 4312(4)    | 2811(3)    | 89.3(19) |
| C23' | 4646(4)  | 3124(4)    | 3142(2)    | 67.0(14) |
| C24' | 5372(5)  | 3293(4)    | 3548(2)    | 76.8(17) |
| C25' | 5733(7)  | 2704(5)    | 3876(3)    | 101(2)   |
| C26' | 5388(7)  | 1915(5)    | 3809(3)    | 101(2)   |
| C27' | 4673(6)  | 1740(4)    | 3425(3)    | 90(2)    |
| C28' | 4318(5)  | 2336(4)    | 3084(3)    | 79.6(18) |
| C29' | 6163(10) | 4356(6)    | 4032(3)    | 160(5)   |
| C30' | 4400(8)  | 399(5)     | 3723(4)    | 125(3)   |
| Cl   | -1267(8) | 3994(6)    | 3471(3)    | 92.0(7)  |
| Cl1' | 338(2)   | 4588.4(14) | 1470.3(8)  | 92.0(7)  |
| N1'  | 1436(4)  | 4241(2)    | 2606.1(17) | 58.4(11) |
| N2'  | 4333(4)  | 3741(3)    | 2819(2)    | 77.4(14) |
| O1'  | 625(3)   | 5277(2)    | 3012.9(15) | 70.8(10) |
| O2'  | 5663(4)  | 4094(3)    | 3578.2(18) | 97.5(15) |
| O3'  | 4270(5)  | 979(3)     | 3331(3)    | 128(2)   |

**Table S19 Anisotropic Displacement Parameters ( $\text{\AA}^2 \times 10^3$ ) for 7l. The Anisotropic displacement factor exponent takes the form:  $-2\pi^2[h^2a^2U_{11}+2hka*b*U_{12}+...]$ .**

| Atom | U <sub>11</sub> | U <sub>22</sub> | U <sub>33</sub> | U <sub>23</sub> | U <sub>13</sub> | U <sub>12</sub> |
|------|-----------------|-----------------|-----------------|-----------------|-----------------|-----------------|
| C1   | 66(4)           | 100(5)          | 143(7)          | 31(5)           | -5(5)           | 0(4)            |
| C2   | 65(5)           | 131(8)          | 171(10)         | 43(7)           | 19(6)           | 21(5)           |
| C3   | 94(6)           | 131(7)          | 119(7)          | 31(6)           | 41(5)           | 52(6)           |
| C4   | 88(5)           | 117(5)          | 82(4)           | 17(4)           | 26(4)           | 43(5)           |
| C5   | 66(3)           | 78(4)           | 63(3)           | 20(3)           | 13(3)           | 13(3)           |
| C6   | 62(4)           | 80(4)           | 92(4)           | 25(4)           | 4(3)            | 6(3)            |

|      |          |           |           |           |           |          |
|------|----------|-----------|-----------|-----------|-----------|----------|
| C7   | 70(4)    | 75(4)     | 98(5)     | 3(3)      | -15(4)    | -10(3)   |
| C8   | 66(3)    | 58(3)     | 80(4)     | -7(3)     | -4(3)     | -1(3)    |
| C9   | 60(3)    | 51(3)     | 54(3)     | 7(2)      | 3(2)      | 4(2)     |
| C10  | 71(3)    | 63(3)     | 57(3)     | 4(3)      | 0(3)      | 6(3)     |
| C11  | 55(3)    | 46(2)     | 54(3)     | 3(2)      | 4(2)      | 1(2)     |
| C12  | 59(3)    | 53(3)     | 50(3)     | 7(2)      | 6(2)      | 4(2)     |
| C13  | 61(3)    | 76(3)     | 63(3)     | 8(3)      | 4(3)      | 20(3)    |
| C14  | 64(3)    | 91(4)     | 79(4)     | 7(3)      | -13(3)    | -8(3)    |
| C15  | 76(4)    | 52(3)     | 61(3)     | -5(2)     | -1(3)     | -2(3)    |
| C16  | 62(3)    | 50(3)     | 60(3)     | 5(2)      | 0(3)      | 0(3)     |
| C17  | 92(4)    | 53(3)     | 55(3)     | 13(2)     | 9(3)      | 5(3)     |
| C18  | 112(5)   | 69(4)     | 78(4)     | 8(3)      | 11(4)     | 6(4)     |
| C19  | 162(9)   | 104(6)    | 63(4)     | -3(4)     | 12(5)     | -2(6)    |
| C20  | 147(9)   | 128(7)    | 88(6)     | 5(5)      | 47(6)     | 16(7)    |
| C21  | 104(6)   | 111(6)    | 123(7)    | 27(5)     | 35(6)     | 1(5)     |
| C22  | 87(5)    | 91(5)     | 92(5)     | 17(4)     | 30(4)     | 5(4)     |
| C23  | 56(3)    | 74(3)     | 47(3)     | 12(2)     | -3(2)     | -4(3)    |
| C24  | 59(3)    | 82(4)     | 64(3)     | 2(3)      | 3(3)      | -2(3)    |
| C25  | 79(4)    | 107(5)    | 81(4)     | 17(4)     | 18(4)     | -24(4)   |
| C26  | 96(5)    | 85(5)     | 87(5)     | 25(4)     | 4(4)      | -28(4)   |
| C27  | 86(5)    | 71(4)     | 79(4)     | 19(3)     | -5(4)     | -7(3)    |
| C28  | 66(3)    | 68(3)     | 64(3)     | 22(3)     | 5(3)      | -3(3)    |
| C29  | 90(6)    | 155(8)    | 139(7)    | -30(6)    | -4(5)     | 30(6)    |
| C30  | 166(9)   | 70(5)     | 121(6)    | 28(4)     | 7(6)      | -18(5)   |
| C11  | 99.5(14) | 121.5(16) | 100.4(14) | -19.4(12) | -15.1(12) | -4.9(13) |
| C11A | 99.5(14) | 121.5(16) | 100.4(14) | -19.4(12) | -15.1(12) | -4.9(13) |
| N1   | 61(3)    | 42(2)     | 53(2)     | 3.5(18)   | 7(2)      | 8(2)     |
| N2   | 67(3)    | 68(3)     | 59(3)     | 12(2)     | 14(2)     | 10(3)    |
| O1   | 89(3)    | 52(2)     | 77(3)     | 15.9(18)  | 10(2)     | 16(2)    |
| O2   | 67(3)    | 103(3)    | 102(3)    | -1(3)     | 18(2)     | -2(3)    |
| O3   | 119(4)   | 64(2)     | 113(4)    | 29(2)     | 5(3)      | -1(3)    |
| C1'  | 70(4)    | 123(6)    | 72(4)     | -32(4)    | -12(3)    | 2(4)     |
| C2'  | 88(5)    | 165(8)    | 68(4)     | -37(5)    | -16(4)    | 18(5)    |
| C3'  | 110(7)   | 196(10)   | 54(4)     | -10(5)    | 4(4)      | 47(7)    |
| C4'  | 105(6)   | 146(7)    | 60(4)     | 24(4)     | 9(4)      | 30(5)    |
| C5'  | 68(4)    | 97(5)     | 60(3)     | 10(3)     | 2(3)      | 23(4)    |
| C6'  | 55(3)    | 95(4)     | 53(3)     | -8(3)     | -4(3)     | 12(3)    |
| C7'  | 56(3)    | 74(3)     | 59(3)     | -6(3)     | 1(2)      | -8(3)    |
| C8'  | 60(3)    | 52(3)     | 58(3)     | -4(2)     | -2(2)     | 0(2)     |
| C9'  | 80(4)    | 60(3)     | 68(3)     | 4(3)      | -2(3)     | -7(3)    |

|      |           |           |          |           |          |          |
|------|-----------|-----------|----------|-----------|----------|----------|
| C10' | 94(5)     | 77(4)     | 81(4)    | 18(3)     | 14(4)    | 2(4)     |
| C11' | 61(3)     | 55(3)     | 55(3)    | -10(2)    | -3(2)    | -1(2)    |
| C12' | 59(3)     | 65(3)     | 71(3)    | -17(3)    | -5(3)    | 2(3)     |
| C13' | 84(4)     | 107(5)    | 65(4)    | -26(3)    | 7(3)     | 3(4)     |
| C14' | 130(6)    | 88(4)     | 67(4)    | 3(3)      | 26(4)    | -7(4)    |
| C15' | 84(4)     | 65(3)     | 59(3)    | -1(3)     | 8(3)     | -9(3)    |
| C16' | 66(3)     | 47(3)     | 57(3)    | -5(2)     | -5(3)    | 8(3)     |
| C17' | 69(3)     | 58(3)     | 70(3)    | -12(3)    | -4(3)    | 12(3)    |
| C18' | 83(4)     | 78(4)     | 70(4)    | 4(3)      | -18(3)   | 5(3)     |
| C19' | 97(5)     | 106(5)    | 88(5)    | 7(4)      | -33(4)   | 0(5)     |
| C20' | 74(5)     | 123(6)    | 119(7)   | 2(5)      | -20(5)   | 2(5)     |
| C21' | 73(5)     | 115(6)    | 116(6)   | -11(5)    | 11(4)    | 5(4)     |
| C22' | 77(4)     | 100(5)    | 91(5)    | -19(4)    | 1(4)     | 11(4)    |
| C23' | 47(3)     | 86(4)     | 68(3)    | -17(3)    | 3(3)     | 6(3)     |
| C24' | 62(3)     | 98(5)     | 70(4)    | -15(3)    | 1(3)     | -16(3)   |
| C25' | 90(5)     | 117(6)    | 95(5)    | 3(5)      | -26(4)   | -11(5)   |
| C26' | 97(5)     | 99(5)     | 108(6)   | 6(4)      | -27(5)   | 2(5)     |
| C27' | 77(4)     | 76(4)     | 116(6)   | -16(4)    | -5(4)    | 7(4)     |
| C28' | 68(4)     | 76(4)     | 95(5)    | -24(3)    | -19(3)   | 12(3)    |
| C29' | 222(13)   | 143(8)    | 116(7)   | 1(6)      | -59(8)   | -75(9)   |
| C30' | 116(7)    | 89(5)     | 169(9)   | -7(6)     | 38(6)    | 7(5)     |
| C1   | 108.4(16) | 104.0(15) | 63.5(10) | 11.0(10)  | -5.3(11) | -8.6(13) |
| C11' | 108.4(16) | 104.0(15) | 63.5(10) | 11.0(10)  | -5.3(11) | -8.6(13) |
| N1'  | 67(3)     | 50(2)     | 58(2)    | -14.4(19) | -7(2)    | 5(2)     |
| N2'  | 60(3)     | 74(3)     | 98(4)    | -13(3)    | -12(3)   | -5(3)    |
| O1'  | 86(3)     | 56(2)     | 71(2)    | -18.7(18) | -7(2)    | 15(2)    |
| O2'  | 97(3)     | 110(4)    | 85(3)    | -13(3)    | -11(3)   | -40(3)   |
| O3'  | 133(5)    | 78(3)     | 173(6)   | -8(4)     | -48(4)   | 10(3)    |

**Table S20 Bond Lengths for 7l.**

| Atom | Atom | Length/Å  | Atom | Atom | Length/Å  |
|------|------|-----------|------|------|-----------|
| C1   | C2   | 1.345(12) | C1'  | C2'  | 1.373(10) |
| C1   | C6   | 1.426(9)  | C1'  | C6'  | 1.419(8)  |
| C2   | C3   | 1.384(12) | C2'  | C3'  | 1.375(12) |
| C3   | C4   | 1.374(10) | C3'  | C4'  | 1.363(12) |
| C4   | C5   | 1.396(9)  | C4'  | C5'  | 1.422(8)  |
| C5   | C6   | 1.405(9)  | C5'  | C6'  | 1.412(9)  |
| C5   | C10  | 1.426(8)  | C5'  | C10' | 1.411(9)  |
| C6   | C7   | 1.411(9)  | C6'  | C7'  | 1.403(7)  |
| C7   | C8   | 1.364(8)  | C7'  | C8'  | 1.362(7)  |

|     |      |           |      |      |           |
|-----|------|-----------|------|------|-----------|
| C8  | C9   | 1.419(7)  | C8'  | C9'  | 1.411(7)  |
| C9  | C10  | 1.354(7)  | C8'  | C11' | 1.532(7)  |
| C9  | C11  | 1.534(7)  | C9'  | C10' | 1.338(8)  |
| C11 | C12  | 1.556(6)  | C11' | C12' | 1.560(7)  |
| C11 | C15  | 1.527(7)  | C11' | C15' | 1.533(7)  |
| C11 | N1   | 1.469(6)  | C11' | N1'  | 1.464(7)  |
| C12 | C13  | 1.546(7)  | C12' | C13' | 1.529(8)  |
| C12 | N2   | 1.446(6)  | C12' | N2'  | 1.468(7)  |
| C13 | C14  | 1.543(8)  | C13' | C14' | 1.536(9)  |
| C14 | C15  | 1.533(8)  | C14' | C15' | 1.519(8)  |
| C16 | C17  | 1.504(8)  | C16' | C17' | 1.507(8)  |
| C16 | N1   | 1.336(6)  | C16' | N1'  | 1.338(6)  |
| C16 | O1   | 1.232(6)  | C16' | O1'  | 1.232(5)  |
| C17 | C18  | 1.371(9)  | C17' | C18' | 1.379(8)  |
| C17 | C22  | 1.404(9)  | C17' | C22' | 1.388(9)  |
| C18 | C19  | 1.381(10) | C18' | C19' | 1.386(9)  |
| C18 | Cl1  | 1.712(8)  | C18' | Cl1' | 1.761(7)  |
| C19 | C20  | 1.376(12) | C19' | C20' | 1.373(11) |
| C20 | C21  | 1.348(12) | C20' | C21' | 1.364(11) |
| C21 | C22  | 1.385(10) | C21' | C22' | 1.384(10) |
| C22 | Cl1A | 1.506(18) | C22' | Cl1  | 1.759(10) |
| C23 | C24  | 1.412(7)  | C23' | C24' | 1.395(8)  |
| C23 | C28  | 1.377(7)  | C23' | C28' | 1.387(8)  |
| C23 | N2   | 1.382(7)  | C23' | N2'  | 1.374(8)  |
| C24 | C25  | 1.367(9)  | C24' | C25' | 1.364(9)  |
| C24 | O2   | 1.396(8)  | C24' | O2'  | 1.388(7)  |
| C25 | C26  | 1.379(10) | C25' | C26' | 1.395(10) |
| C26 | C27  | 1.386(9)  | C26' | C27' | 1.349(10) |
| C27 | C28  | 1.394(7)  | C27' | C28' | 1.389(9)  |
| C27 | O3   | 1.382(8)  | C27' | O3'  | 1.386(8)  |
| C29 | O2   | 1.393(9)  | C29' | O2'  | 1.378(8)  |
| C30 | O3   | 1.423(7)  | C30' | O3'  | 1.400(10) |

**Table S21 Bond Angles for 7l.**

| Atom | Atom | Atom | Angle/°  | Atom | Atom | Atom | Angle/°  |
|------|------|------|----------|------|------|------|----------|
| C2   | C1   | C6   | 119.9(9) | C2'  | C1'  | C6'  | 120.3(8) |
| C1   | C2   | C3   | 121.9(8) | C1'  | C2'  | C3'  | 120.9(8) |
| C4   | C3   | C2   | 119.5(8) | C4'  | C3'  | C2'  | 120.9(7) |
| C3   | C4   | C5   | 120.9(8) | C3'  | C4'  | C5'  | 120.4(8) |
| C4   | C5   | C6   | 119.1(6) | C6'  | C5'  | C4'  | 119.0(7) |

|     |     |      |           |      |      |      |          |
|-----|-----|------|-----------|------|------|------|----------|
| C4  | C5  | C10  | 122.5(7)  | C10' | C5'  | C4'  | 122.8(7) |
| C6  | C5  | C10  | 118.4(6)  | C10' | C5'  | C6'  | 118.2(5) |
| C5  | C6  | C1   | 118.8(7)  | C5'  | C6'  | C1'  | 118.5(6) |
| C5  | C6  | C7   | 119.3(6)  | C7'  | C6'  | C1'  | 122.8(6) |
| C7  | C6  | C1   | 122.0(7)  | C7'  | C6'  | C5'  | 118.6(5) |
| C8  | C7  | C6   | 120.4(6)  | C8'  | C7'  | C6'  | 122.5(6) |
| C7  | C8  | C9   | 121.4(6)  | C7'  | C8'  | C9'  | 117.7(5) |
| C8  | C9  | C11  | 118.5(5)  | C7'  | C8'  | C11' | 123.2(5) |
| C10 | C9  | C8   | 118.5(5)  | C9'  | C8'  | C11' | 118.9(5) |
| C10 | C9  | C11  | 123.1(5)  | C10' | C9'  | C8'  | 121.8(6) |
| C9  | C10 | C5   | 122.1(6)  | C9'  | C10' | C5'  | 121.1(6) |
| C9  | C11 | C12  | 112.4(4)  | C8'  | C11' | C12' | 115.2(4) |
| C15 | C11 | C9   | 117.2(4)  | C8'  | C11' | C15' | 115.9(4) |
| C15 | C11 | C12  | 101.6(4)  | C15' | C11' | C12' | 101.1(4) |
| N1  | C11 | C9   | 110.0(4)  | N1'  | C11' | C8'  | 109.3(4) |
| N1  | C11 | C12  | 105.5(4)  | N1'  | C11' | C12' | 105.8(4) |
| N1  | C11 | C15  | 109.2(4)  | N1'  | C11' | C15' | 108.8(5) |
| C13 | C12 | C11  | 103.6(4)  | C13' | C12' | C11' | 102.9(5) |
| N2  | C12 | C11  | 110.0(4)  | N2'  | C12' | C11' | 111.1(4) |
| N2  | C12 | C13  | 111.7(4)  | N2'  | C12' | C13' | 111.7(5) |
| C14 | C13 | C12  | 106.2(4)  | C12' | C13' | C14' | 106.6(5) |
| C15 | C14 | C13  | 105.6(5)  | C15' | C14' | C13' | 105.8(5) |
| C11 | C15 | C14  | 103.6(4)  | C14' | C15' | C11' | 104.4(5) |
| N1  | C16 | C17  | 115.5(4)  | N1'  | C16' | C17' | 117.2(4) |
| O1  | C16 | C17  | 121.6(5)  | O1'  | C16' | C17' | 120.4(5) |
| O1  | C16 | N1   | 122.8(5)  | O1'  | C16' | N1'  | 122.4(5) |
| C18 | C17 | C16  | 123.6(6)  | C18' | C17' | C16' | 125.0(6) |
| C18 | C17 | C22  | 117.3(6)  | C18' | C17' | C22' | 117.7(6) |
| C22 | C17 | C16  | 118.9(6)  | C22' | C17' | C16' | 117.3(5) |
| C17 | C18 | C19  | 121.9(8)  | C17' | C18' | C19' | 121.9(7) |
| C17 | C18 | C11  | 119.6(6)  | C17' | C18' | C11' | 121.8(5) |
| C19 | C18 | C11  | 118.4(7)  | C19' | C18' | C11' | 116.3(5) |
| C20 | C19 | C18  | 119.2(8)  | C20' | C19' | C18' | 119.1(7) |
| C21 | C20 | C19  | 120.9(9)  | C21' | C20' | C19' | 120.2(7) |
| C20 | C21 | C22  | 119.9(9)  | C20' | C21' | C22' | 120.5(8) |
| C17 | C22 | C11A | 124.8(12) | C17' | C22' | C1   | 126.7(6) |
| C21 | C22 | C17  | 120.8(8)  | C21' | C22' | C17' | 120.6(7) |
| C21 | C22 | C11A | 112.4(12) | C21' | C22' | C1   | 109.2(7) |
| C28 | C23 | C24  | 118.4(5)  | C28' | C23' | C24' | 117.4(6) |
| C28 | C23 | N2   | 124.0(5)  | N2'  | C23' | C24' | 118.1(6) |

|     |     |     |          |      |      |      |          |
|-----|-----|-----|----------|------|------|------|----------|
| N2  | C23 | C24 | 117.6(5) | N2'  | C23' | C28' | 124.5(6) |
| C25 | C24 | C23 | 120.5(6) | C25' | C24' | C23' | 120.9(6) |
| C25 | C24 | O2  | 123.1(6) | C25' | C24' | O2'  | 125.3(6) |
| O2  | C24 | C23 | 116.3(5) | O2'  | C24' | C23' | 113.8(6) |
| C24 | C25 | C26 | 121.0(6) | C24' | C25' | C26' | 120.6(7) |
| C25 | C26 | C27 | 119.1(6) | C27' | C26' | C25' | 119.5(7) |
| C26 | C27 | C28 | 120.4(6) | C26' | C27' | C28' | 120.1(7) |
| O3  | C27 | C26 | 125.2(6) | C26' | C27' | O3'  | 124.0(7) |
| O3  | C27 | C28 | 114.5(6) | O3'  | C27' | C28' | 115.9(7) |
| C23 | C28 | C27 | 120.6(5) | C23' | C28' | C27' | 121.5(6) |
| C16 | N1  | C11 | 123.6(4) | C16' | N1'  | C11' | 123.3(4) |
| C23 | N2  | C12 | 122.0(5) | C23' | N2'  | C12' | 123.2(5) |
| C29 | O2  | C24 | 116.6(6) | C29' | O2'  | C24' | 118.0(6) |
| C27 | O3  | C30 | 117.5(6) | C27' | O3'  | C30' | 118.2(7) |

**Table S22 Hydrogen Bonds for 7l.**

| D   | H    | A               | d(D-H)/Å | d(H-A)/Å | d(D-A)/Å | D-H-A/° |
|-----|------|-----------------|----------|----------|----------|---------|
| N1  | H1A  | O1 <sup>1</sup> | 0.82(4)  | 1.98(4)  | 2.786(5) | 173(4)  |
| N2  | H2A  | O2              | 0.84(3)  | 2.27(5)  | 2.673(6) | 109(4)  |
| N1' | H1'A | O1 <sup>2</sup> | 0.85(3)  | 1.97(3)  | 2.812(5) | 167(6)  |

<sup>1</sup>1+X,+Y,+Z; <sup>2</sup>1-X,-1/2+Y,1/2-Z

**Table S23 Torsion Angles for 7l.**

| A  | B  | C   | D   | Angle/°   | A   | B   | C    | D    | Angle/°   |
|----|----|-----|-----|-----------|-----|-----|------|------|-----------|
| C1 | C2 | C3  | C4  | -0.7(14)  | C1' | C2' | C3'  | C4'  | -0.3(13)  |
| C1 | C6 | C7  | C8  | -179.4(6) | C1' | C6' | C7'  | C8'  | -176.9(6) |
| C2 | C1 | C6  | C5  | 0.3(11)   | C2' | C1' | C6'  | C5'  | -0.6(10)  |
| C2 | C1 | C6  | C7  | 179.2(7)  | C2' | C1' | C6'  | C7'  | 175.5(6)  |
| C2 | C3 | C4  | C5  | 0.3(12)   | C2' | C3' | C4'  | C5'  | -0.2(13)  |
| C3 | C4 | C5  | C6  | 0.4(10)   | C3' | C4' | C5'  | C6'  | 0.3(10)   |
| C3 | C4 | C5  | C10 | 179.7(6)  | C3' | C4' | C5'  | C10' | -178.2(7) |
| C4 | C5 | C6  | C1  | -0.6(9)   | C4' | C5' | C6'  | C1'  | 0.1(9)    |
| C4 | C5 | C6  | C7  | -179.6(6) | C4' | C5' | C6'  | C7'  | -176.2(6) |
| C4 | C5 | C10 | C9  | 179.2(6)  | C4' | C5' | C10' | C9'  | 176.4(6)  |
| C5 | C6 | C7  | C8  | -0.5(10)  | C5' | C6' | C7'  | C8'  | -0.8(9)   |
| C6 | C1 | C2  | C3  | 0.4(13)   | C6' | C1' | C2'  | C3'  | 0.7(12)   |
| C6 | C5 | C10 | C9  | -1.5(8)   | C6' | C5' | C10' | C9'  | -2.2(10)  |
| C6 | C7 | C8  | C9  | 0.3(10)   | C6' | C7' | C8'  | C9'  | -1.2(9)   |
| C7 | C8 | C9  | C10 | -0.7(9)   | C6' | C7' | C8'  | C11' | 174.3(5)  |



|                 |            |                     |           |
|-----------------|------------|---------------------|-----------|
| C7 C8 C9 C11    | 178.8(5)   | C7' C8' C9' C10'    | 1.6(9)    |
| C8 C9 C10C5     | 1.3(8)     | C7' C8' C11'C12'    | 108.7(6)  |
| C8 C9 C11C12    | -73.7(6)   | C7' C8' C11'C15'    | -9.0(8)   |
| C8 C9 C11C15    | 169.0(5)   | C7' C8' C11'N1'     | -132.3(5) |
| C8 C9 C11N1     | 43.6(6)    | C8' C9' C10'C5'     | 0.2(10)   |
| C9 C11C12C13    | -166.0(4)  | C8' C11'C12'C13'    | -167.0(5) |
| C9 C11C12N2     | -46.5(6)   | C8' C11'C12'N2'     | -47.3(6)  |
| C9 C11C15C14    | 166.5(4)   | C8' C11'C15'C14'    | 167.2(5)  |
| C9 C11N1 C16    | 60.2(6)    | C8' C11'N1' C16'    | 60.2(6)   |
| C10C5 C6 C1     | 180.0(6)   | C9' C8' C11'C12'    | -75.8(6)  |
| C10C5 C6 C7     | 1.1(9)     | C9' C8' C11'C15'    | 166.6(5)  |
| C10C9 C11C12    | 105.7(6)   | C9' C8' C11'N1'     | 43.2(6)   |
| C10C9 C11C15    | -11.5(7)   | C10'C5' C6' C1'     | 178.7(6)  |
| C10C9 C11N1     | -137.0(5)  | C10'C5' C6' C7'     | 2.5(9)    |
| C11C9 C10C5     | -178.2(5)  | C11'C8' C9' C10'    | -174.2(6) |
| C11C12C13C14    | 21.3(5)    | C11'C12'C13'C14'    | 25.6(7)   |
| C11C12N2 C23    | 158.2(5)   | C11'C12'N2' C23'    | 105.4(6)  |
| C12C11C15C14    | 43.5(5)    | C12'C11'C15'C14'    | 42.0(6)   |
| C12C11N1 C16    | -178.3(5)  | C12'C11'N1' C16'    | -175.2(5) |
| C12C13C14C15    | 5.4(6)     | C12'C13'C14'C15'    | 0.1(8)    |
| C13C12N2 C23    | -87.3(6)   | C13'C12'N2' C23'    | -140.3(6) |
| C13C14C15C11    | -30.6(6)   | C13'C14'C15'C11'    | -26.5(8)  |
| C15C11C12C13    | -39.9(5)   | C15'C11'C12'C13'    | -41.3(5)  |
| C15C11C12N2     | 79.7(5)    | C15'C11'C12'N2'     | 78.4(6)   |
| C15C11N1 C16    | -69.7(6)   | C15'C11'N1' C16'    | -67.3(6)  |
| C16C17C18C19    | 175.8(6)   | C16'C17'C18'C19'    | -176.8(6) |
| C16C17C18C11    | -7.9(8)    | C16'C17'C18'C11'    | 3.2(8)    |
| C16C17C22C21    | -176.2(6)  | C16'C17'C22'C21'    | 176.3(6)  |
| C16C17C22C11A   | 21.2(15)   | C16'C17'C22'CI      | -27.0(10) |
| C17C16N1 C11    | 173.0(5)   | C17'C16'N1' C11'    | -178.4(5) |
| C17C18C19C20    | -1.1(12)   | C17'C18'C19'C20'    | 1.0(11)   |
| C18C17C22C21    | -0.4(10)   | C18'C17'C22'C21'    | -0.2(10)  |
| C18C17C22C11A   | -163.0(13) | C18'C17'C22'CI      | 156.6(6)  |
| C18C19C20C21    | 2.3(14)    | C18'C19'C20'C21'    | -0.6(12)  |
| C19C20C21 C22   | -2.6(14)   | C19'C20'C21'C22'    | -0.2(13)  |
| C20C21 C22 C17  | 1.6(12)    | C20'C21'C22'C17'    | 0.6(12)   |
| C20C21 C22 C11A | 166.2(13)  | C20'C21'C22'CI      | -159.8(8) |
| C22C17C18C19    | 0.2(10)    | C22'C17'C18'C19'    | -0.6(10)  |
| C22C17C18C11    | 176.5(5)   | C22'C17'C18'C11'    | 179.3(5)  |
| C23 C24 C25 C26 | 0.7(10)    | C23' C24' C25' C26' | 0.5(12)   |

|                 |           |                     |           |
|-----------------|-----------|---------------------|-----------|
| C23 C24 O2 C29  | 114.1(7)  | C23' C24' O2' C29'  | 164.9(7)  |
| C24 C23 C28 C27 | 2.9(9)    | C24' C23' C28' C27' | 1.7(9)    |
| C24 C23 N2 C12  | -166.3(5) | C24' C23' N2' C12'  | -150.8(5) |
| C24 C25 C26 C27 | 1.6(11)   | C24' C25' C26' C27' | -1.5(13)  |
| C25 C24 O2 C29  | -67.6(9)  | C25' C24' O2' C29'  | -14.7(11) |
| C25 C26 C27 C28 | -1.8(11)  | C25' C26' C27' C28' | 2.6(13)   |
| C25 C26 C27 O3  | 178.2(7)  | C25' C26' C27' O3'  | -179.1(8) |
| C26 C27 C28 C23 | -0.5(10)  | C26' C27' C28' C23' | -2.8(11)  |
| C26 C27 O3 C30  | 5.8(10)   | C26' C27' O3' C30'  | 15.7(12)  |
| C28 C23 C24 C25 | -3.0(9)   | C28' C23' C24' C25' | -0.6(10)  |
| C28 C23 C24 O2  | 175.4(5)  | C28' C23' C24' O2'  | 179.8(5)  |
| C28 C23 N2 C12  | 14.8(9)   | C28' C23' N2' C12'  | 31.4(9)   |
| C28 C27 O3 C30  | -174.2(6) | C28' C27' O3' C30'  | -166.0(7) |
| C11 C18 C19 C20 | -177.5(7) | C11' C18' C19' C20' | -179.0(6) |
| N1 C11 C12 C13  | 74.1(5)   | N1' C11' C12' C13'  | 72.1(5)   |
| N1 C11 C12 N2   | -166.4(4) | N1' C11' C12' N2'   | -168.2(5) |
| N1 C11 C15 C14  | -67.7(5)  | N1' C11' C15' C14'  | -69.1(6)  |
| N1 C16 C17 C18  | 103.8(7)  | N1' C16' C17' C18'  | -60.5(8)  |
| N1 C16 C17 C22  | -80.7(7)  | N1' C16' C17' C22'  | 123.3(6)  |
| N2 C12 C13 C14  | -97.0(5)  | N2' C12' C13' C14'  | -93.6(6)  |
| N2 C23 C24 C25  | 178.0(6)  | N2' C23' C24' C25'  | -178.5(6) |
| N2 C23 C24 O2   | -3.7(8)   | N2' C23' C24' O2'   | 1.9(8)    |
| N2 C23 C28 C27  | -178.2(6) | N2' C23' C28' C27'  | 179.5(6)  |
| O1 C16 C17 C18  | -79.0(8)  | O1' C16' C17' C18'  | 120.7(6)  |
| O1 C16 C17 C22  | 96.6(7)   | O1' C16' C17' C22'  | -55.5(8)  |
| O1 C16 N1 C11   | -4.2(8)   | O1' C16' N1' C11'   | 0.4(8)    |
| O2 C24 C25 C26  | -177.5(6) | O2' C24' C25' C26'  | -179.9(7) |
| O3 C27 C28 C23  | 179.5(5)  | O3' C27' C28' C23'  | 178.8(6)  |

**Table S24 Hydrogen Atom Coordinates ( $\text{\AA}\times 10^4$ ) and Isotropic Displacement Parameters ( $\text{\AA}^2\times 10^3$ ) for 7l.**

| Atom | x    | y    | z    | U(eq) |
|------|------|------|------|-------|
| H1   | 3911 | 6773 | 3272 | 123   |
| H2   | 3001 | 7673 | 3769 | 147   |
| H3   | 3880 | 8469 | 4375 | 138   |
| H4   | 5716 | 8337 | 4494 | 115   |
| H7   | 5668 | 6109 | 3036 | 97    |
| H8   | 7488 | 5982 | 3156 | 82    |
| H10  | 7462 | 7693 | 4253 | 77    |
| H12  | 9050 | 5447 | 3866 | 65    |

|      |          |          |          |        |
|------|----------|----------|----------|--------|
| H13A | 10488    | 5794     | 4597     | 80     |
| H13B | 10811    | 5722     | 3998     | 80     |
| H14A | 10896    | 7091     | 4562     | 94     |
| H14B | 11103    | 7034     | 3951     | 94     |
| H15A | 9128     | 7429     | 4453     | 75     |
| H15B | 9596     | 7811     | 3931     | 75     |
| H18  | 8932     | 6690     | 1928     | 104    |
| H19  | 10027    | 6540     | 1201     | 132    |
| H20  | 11841    | 6845     | 1262     | 145    |
| H21  | 12581    | 7199     | 2048     | 135    |
| H22  | 11491    | 7361     | 2779     | 108    |
| H25  | 6589     | 4352     | 5645     | 107    |
| H26  | 7521     | 3193     | 5449     | 107    |
| H28  | 9437     | 4444     | 4468     | 79     |
| H29A | 5765     | 5785     | 4757     | 192    |
| H29B | 5555     | 6382     | 5222     | 192    |
| H29C | 5404     | 5460     | 5310     | 192    |
| H30A | 9378     | 1899     | 4840     | 179    |
| H30B | 8188     | 2197     | 4922     | 179    |
| H30C | 9035     | 2287     | 5377     | 179    |
| H1A  | 9710(30) | 6210(20) | 3195(16) | 29(11) |
| H2A  | 7970(30) | 6180(20) | 4600(20) | 52(15) |
| H1'  | 3610     | 5879     | 4505     | 106    |
| H2'  | 3237     | 5849     | 5390     | 129    |
| H3'  | 2215     | 4840     | 5745     | 144    |
| H4'  | 1528     | 3847     | 5225     | 124    |
| H7'  | 3314     | 5302     | 3607     | 76     |
| H9'  | 1567     | 3313     | 3445     | 83     |
| H10' | 1310     | 3243     | 4321     | 101    |
| H12' | 2944     | 3238     | 2553     | 78     |
| H13C | 2843     | 3835     | 1765     | 103    |
| H13D | 4087     | 3989     | 1853     | 103    |
| H14C | 3779     | 5293     | 1897     | 114    |
| H14D | 2534     | 5139     | 1811     | 114    |
| H15C | 2422     | 5601     | 2639     | 83     |
| H15D | 3612     | 5332     | 2778     | 83     |
| H18' | -121     | 4508     | 1705     | 92     |
| H19' | -1809    | 4187     | 1378     | 116    |
| H20' | -3219    | 3967     | 1956     | 127    |
| H21' | -2934    | 4044     | 2846     | 122    |

|      |          |          |          |         |
|------|----------|----------|----------|---------|
| H22' | -1240    | 4336     | 3174     | 107     |
| H25' | 6212     | 2829     | 4146     | 121     |
| H26' | 5650     | 1514     | 4028     | 122     |
| H28' | 3850     | 2202     | 2811     | 96      |
| H29D | 6168     | 4930     | 4038     | 241     |
| H29E | 6893     | 4161     | 4041     | 241     |
| H29F | 5776     | 4159     | 4333     | 241     |
| H30D | 4115     | -102     | 3602     | 187     |
| H30E | 4021     | 562      | 4035     | 187     |
| H30F | 5155     | 338      | 3802     | 187     |
| H1'A | 1400(60) | 3770(20) | 2470(20) | 100(20) |
| H2'A | 4560(60) | 4200(30) | 2920(30) | 120(30) |

**Table S25 Atomic Occupancy for 7I.**

| Atom | Occupancy | Atom | Occupancy | Atom | Occupancy |
|------|-----------|------|-----------|------|-----------|
| H18  | 0.087(3)  | H22  | 0.913(3)  | Cl1  | 0.913(3)  |
| Cl1A | 0.087(3)  | H18' | 0.197(3)  | H22' | 0.803(3)  |
| Cl   | 0.197(3)  | Cl1' | 0.803(3)  |      |           |

(3) Absolute configurations of **11**, **15**, **16** and **17** are determined by X-ray structure analysis of the product **15**.

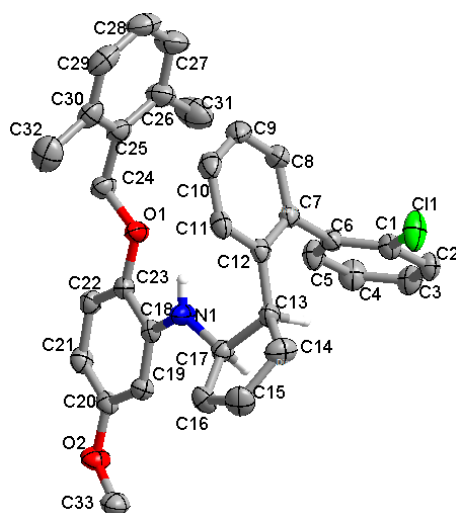

**Fig. S20.** Absolute configuration of **15** (CCDC 2080354).

*Displacement ellipsoids are drawn at the 30% probability level.*

*(Solvent: diethyl ether/hexane = 5:1)*

**Table S26 Crystal data and structure refinement for 20210476.**

|                     |                                                   |
|---------------------|---------------------------------------------------|
| Identification code | 20210476                                          |
| Empirical formula   | C <sub>33</sub> H <sub>34</sub> ClNO <sub>2</sub> |
| Formula weight      | 512.06                                            |
| Temperature/K       | 293(2)                                            |

|                                             |                                                                |
|---------------------------------------------|----------------------------------------------------------------|
| Crystal system                              | monoclinic                                                     |
| Space group                                 | P2 <sub>1</sub>                                                |
| a/Å                                         | 11.1324(7)                                                     |
| b/Å                                         | 7.5493(6)                                                      |
| c/Å                                         | 16.7445(13)                                                    |
| $\alpha$ /°                                 | 90                                                             |
| $\beta$ /°                                  | 90.526(7)                                                      |
| $\gamma$ /°                                 | 90                                                             |
| Volume/Å <sup>3</sup>                       | 1407.18(18)                                                    |
| Z                                           | 2                                                              |
| $\rho_{\text{calc}}/\text{g}/\text{cm}^3$   | 1.209                                                          |
| $\mu/\text{mm}^{-1}$                        | 1.423                                                          |
| F(000)                                      | 544.0                                                          |
| Crystal size/mm <sup>3</sup>                | 0.13 × 0.11 × 0.1                                              |
| Radiation                                   | CuK $\alpha$ ( $\lambda$ = 1.54184)                            |
| 2 $\theta$ range for data collection/°      | 7.942 to 145.108                                               |
| Index ranges                                | -13 ≤ h ≤ 12, -9 ≤ k ≤ 8, -18 ≤ l ≤ 20                         |
| Reflections collected                       | 12005                                                          |
| Independent reflections                     | 4982 [ $R_{\text{int}}$ = 0.0351, $R_{\text{sigma}}$ = 0.0427] |
| Data/restraints/parameters                  | 4982/6/350                                                     |
| Goodness-of-fit on F <sup>2</sup>           | 1.022                                                          |
| Final R indexes [ $I \geq 2\sigma(I)$ ]     | $R_1$ = 0.0505, $wR_2$ = 0.1279                                |
| Final R indexes [all data]                  | $R_1$ = 0.0629, $wR_2$ = 0.1415                                |
| Largest diff. peak/hole / e Å <sup>-3</sup> | 0.12/-0.26                                                     |
| Flack parameter                             | 0.018(14)                                                      |

**Table S27 Fractional Atomic Coordinates ( $\times 10^4$ ) and Equivalent Isotropic Displacement Parameters ( $\text{\AA}^2 \times 10^3$ ) for 20210476.  $U_{\text{eq}}$  is defined as 1/3 of of the trace of the orthogonalised  $U_{ij}$  tensor.**

| Atom | x       | y       | z       | U(eq)    |
|------|---------|---------|---------|----------|
| C1   | 6889(3) | 3880(6) | 2353(2) | 60.5(9)  |
| C2   | 7668(4) | 5291(6) | 2234(3) | 66.5(10) |
| C3   | 7226(4) | 6970(6) | 2297(3) | 73.0(12) |
| C4   | 6047(5) | 7266(7) | 2467(3) | 81.4(13) |
| C5   | 5287(4) | 5852(6) | 2586(3) | 74.1(12) |
| C6   | 5687(3) | 4106(6) | 2531(2) | 56.2(8)  |
| C7   | 4872(3) | 2589(5) | 2701(2) | 55.8(9)  |
| C8   | 4710(4) | 2060(7) | 3486(3) | 73.6(12) |
| C9   | 3956(4) | 680(8)  | 3683(3) | 81.5(14) |
| C10  | 3327(4) | -151(7) | 3101(3) | 78.8(13) |
| C11  | 3467(4) | 336(7)  | 2311(3) | 70.6(11) |

|      |            |            |            |          |
|------|------------|------------|------------|----------|
| C12  | 4241(3)    | 1702(6)    | 2092(2)    | 54.5(8)  |
| C13  | 4330(3)    | 2298(6)    | 1232(2)    | 61.5(10) |
| C14  | 4530(40)   | 1060(40)   | 527(17)    | 86(4)    |
| C15  | 3610(40)   | 1340(100)  | -120(30)   | 86(4)    |
| C16  | 2860(20)   | 2920(30)   | 162(14)    | 75(3)    |
| C17  | 3298(3)    | 3555(6)    | 949(2)     | 57.0(9)  |
| C18  | 1816(3)    | 5561(5)    | 1587(2)    | 51.3(8)  |
| C19  | 1544(3)    | 6553(6)    | 903(2)     | 55.0(8)  |
| C20  | 788(3)     | 8011(5)    | 943(2)     | 57.1(9)  |
| C21  | 310(4)     | 8530(6)    | 1661(3)    | 64.4(10) |
| C22  | 585(4)     | 7554(6)    | 2347(2)    | 62.4(10) |
| C23  | 1316(3)    | 6105(6)    | 2316(2)    | 55.5(9)  |
| C24  | 1035(4)    | 5335(7)    | 3686(3)    | 71.8(11) |
| C25  | 1440(4)    | 3981(7)    | 4284(2)    | 69.9(11) |
| C26  | 2352(5)    | 4407(9)    | 4831(3)    | 88.3(15) |
| C27  | 2666(7)    | 3190(11)   | 5408(3)    | 110(2)   |
| C28  | 2120(7)    | 1597(11)   | 5454(4)    | 108(2)   |
| C29  | 1254(6)    | 1113(9)    | 4905(4)    | 101(2)   |
| C30  | 900(5)     | 2318(8)    | 4308(3)    | 81.4(14) |
| C31  | 2998(8)    | 6155(12)   | 4796(5)    | 136(3)   |
| C32  | -43(6)     | 1816(12)   | 3702(4)    | 115(2)   |
| C33  | 805(5)     | 8378(8)    | -473(3)    | 83.4(14) |
| Cl1  | 7453.0(11) | 1743.4(19) | 2245.6(12) | 103.1(5) |
| N1   | 2510(3)    | 4069(6)    | 1583(2)    | 70.1(10) |
| O1   | 1662(3)    | 5074(5)    | 2963.6(16) | 72.3(8)  |
| O2   | 455(3)     | 9002(5)    | 291.2(19)  | 78.9(9)  |
| C14A | 4260(30)   | 680(20)    | 661(12)    | 86(4)    |
| C15A | 3730(30)   | 1530(60)   | -70(20)    | 86(4)    |
| C16A | 2607(13)   | 2290(20)   | 339(9)     | 75(3)    |

**Table S28 Anisotropic Displacement Parameters ( $\text{\AA}^2 \times 10^3$ ) for 20210476. The Anisotropic displacement factor exponent takes the form:  $-2\pi^2[h^2a^{*2}U_{11}+2hka^*b^*U_{12}+\dots]$ .**

| Atom | $U_{11}$ | $U_{22}$ | $U_{33}$ | $U_{23}$ | $U_{13}$ | $U_{12}$ |
|------|----------|----------|----------|----------|----------|----------|
| C1   | 57(2)    | 53(2)    | 72(2)    | -1.2(18) | -0.8(16) | 1.0(17)  |
| C2   | 55(2)    | 63(3)    | 82(3)    | -4(2)    | 0.9(17)  | -8.4(18) |
| C3   | 73(3)    | 53(3)    | 93(3)    | -1(2)    | 3(2)     | -13(2)   |
| C4   | 82(3)    | 51(3)    | 112(4)   | 0(2)     | 3(3)     | 2(2)     |
| C5   | 58(2)    | 62(3)    | 102(3)   | -1(2)    | 4(2)     | 6(2)     |
| C6   | 54.2(18) | 57(2)    | 57.0(19) | 1.6(16)  | -4.6(14) | -1.1(16) |
| C7   | 44.5(17) | 56(2)    | 66(2)    | 6.7(17)  | 0.3(14)  | 2.3(15)  |

|      |          |         |           |          |          |          |
|------|----------|---------|-----------|----------|----------|----------|
| C8   | 66(2)    | 88(4)   | 66(2)     | 11(2)    | -5.7(18) | -4(2)    |
| C9   | 72(3)    | 95(4)   | 78(3)     | 35(3)    | 6(2)     | 0(3)     |
| C10  | 60(2)    | 74(3)   | 102(3)    | 25(3)    | 2(2)     | -10(2)   |
| C11  | 50.4(19) | 61(3)   | 100(3)    | 4(2)     | -9.6(19) | -6.2(17) |
| C12  | 43.9(15) | 51(2)   | 68(2)     | 2.4(17)  | -1.2(14) | 6.7(16)  |
| C13  | 50.2(18) | 72(3)   | 62(2)     | -3.8(18) | 1.7(15)  | 7.0(17)  |
| C14  | 115(14)  | 71(10)  | 73(7)     | -4(7)    | 15(5)    | 26(7)    |
| C15  | 95(6)    | 86(10)  | 78(4)     | -34(5)   | -4(5)    | -5(6)    |
| C16  | 72(6)    | 77(10)  | 77(7)     | -7(5)    | -15(5)   | -2(5)    |
| C17  | 58.6(19) | 58(2)   | 54.4(19)  | 2.6(17)  | 5.6(15)  | 5.9(17)  |
| C18  | 45.3(16) | 53(2)   | 55.8(19)  | 0.0(15)  | -0.8(13) | 2.3(14)  |
| C19  | 59.2(18) | 53(2)   | 52.5(18)  | -1.8(16) | -1.2(14) | 4.0(17)  |
| C20  | 54.4(19) | 48(2)   | 69(2)     | 7.8(16)  | -5.7(16) | 0.5(15)  |
| C21  | 60(2)    | 53(2)   | 80(3)     | 1.4(19)  | 5.1(18)  | 8.5(18)  |
| C22  | 55(2)    | 70(3)   | 62(2)     | -4.6(19) | 6.9(16)  | 7.7(18)  |
| C23  | 45.2(16) | 65(3)   | 56(2)     | 3.6(16)  | 1.8(14)  | 1.6(15)  |
| C24  | 77(3)    | 83(3)   | 55(2)     | 0(2)     | 11.4(18) | 9(2)     |
| C25  | 75(3)    | 83(3)   | 52(2)     | 3(2)     | 12.2(17) | 4(2)     |
| C26  | 102(4)   | 98(4)   | 65(3)     | 6(2)     | -9(2)    | -8(3)    |
| C27  | 136(6)   | 127(6)  | 67(3)     | 18(3)    | -13(3)   | 0(5)     |
| C28  | 140(5)   | 114(5)  | 69(3)     | 30(3)    | 18(3)    | 16(5)    |
| C29  | 119(5)   | 86(4)   | 99(4)     | 9(3)     | 47(4)    | -2(3)    |
| C30  | 85(3)    | 88(4)   | 71(3)     | -8(2)    | 24(2)    | -3(3)    |
| C31  | 158(7)   | 120(7)  | 129(6)    | 9(5)     | -49(5)   | -30(5)   |
| C32  | 112(4)   | 108(5)  | 125(5)    | -29(4)   | 11(4)    | -16(4)   |
| C33  | 94(3)    | 87(4)   | 70(3)     | 20(2)    | -2(2)    | 14(3)    |
| Cl1  | 64.0(6)  | 57.8(6) | 187.9(16) | -3.0(9)  | 16.0(7)  | 5.0(6)   |
| N1   | 78(2)    | 79(3)   | 53.5(19)  | 12.7(18) | 10.7(15) | 27(2)    |
| O1   | 69.4(17) | 95(2)   | 52.5(15)  | 11.9(14) | 9.0(12)  | 24.8(16) |
| O2   | 94(2)    | 66(2)   | 75.8(19)  | 15.9(16) | -3.1(15) | 20.0(17) |
| C14A | 115(14)  | 71(10)  | 73(7)     | -4(7)    | 15(5)    | 26(7)    |
| C15A | 95(6)    | 86(10)  | 78(4)     | -34(5)   | -4(5)    | -5(6)    |
| C16A | 72(6)    | 77(10)  | 77(7)     | -7(5)    | -15(5)   | -2(5)    |

**Table S29 Bond Lengths for 20210476.**

| Atom | Atom | Length/Å | Atom | Atom | Length/Å |
|------|------|----------|------|------|----------|
| C1   | C2   | 1.389(6) | C18  | C19  | 1.400(5) |
| C1   | C6   | 1.384(5) | C18  | C23  | 1.407(5) |
| C1   | Cl1  | 1.740(4) | C18  | N1   | 1.366(5) |
| C2   | C3   | 1.364(7) | C19  | C20  | 1.388(6) |

|     |      |           |      |      |           |
|-----|------|-----------|------|------|-----------|
| C3  | C4   | 1.364(7)  | C20  | C21  | 1.377(6)  |
| C4  | C5   | 1.378(7)  | C20  | O2   | 1.371(5)  |
| C5  | C6   | 1.394(6)  | C21  | C22  | 1.396(6)  |
| C6  | C7   | 1.490(5)  | C22  | C23  | 1.365(6)  |
| C7  | C8   | 1.389(6)  | C23  | O1   | 1.386(5)  |
| C7  | C12  | 1.403(5)  | C24  | C25  | 1.497(7)  |
| C8  | C9   | 1.380(7)  | C24  | O1   | 1.416(5)  |
| C9  | C10  | 1.350(8)  | C25  | C26  | 1.398(7)  |
| C10 | C11  | 1.382(7)  | C25  | C30  | 1.393(8)  |
| C11 | C12  | 1.395(6)  | C26  | C27  | 1.376(9)  |
| C12 | C13  | 1.512(6)  | C26  | C31  | 1.504(10) |
| C13 | C14  | 1.52(2)   | C27  | C28  | 1.350(11) |
| C13 | C17  | 1.561(5)  | C28  | C29  | 1.375(10) |
| C13 | C14A | 1.555(16) | C29  | C30  | 1.405(9)  |
| C14 | C15  | 1.49(2)   | C30  | C32  | 1.503(8)  |
| C15 | C16  | 1.53(5)   | C33  | O2   | 1.422(6)  |
| C16 | C17  | 1.48(2)   | C14A | C15A | 1.50(2)   |
| C17 | N1   | 1.437(5)  | C15A | C16A | 1.54(3)   |
| C17 | C16A | 1.592(15) |      |      |           |

**Table S30 Bond Angles for 20210476.**

| Atom | Atom | Atom | Angle/°  | Atom | Atom | Atom | Angle/°  |
|------|------|------|----------|------|------|------|----------|
| C2   | C1   | C11  | 118.0(3) | N1   | C17  | C16A | 110.0(6) |
| C6   | C1   | C2   | 122.8(4) | C19  | C18  | C23  | 118.0(3) |
| C6   | C1   | C11  | 119.1(3) | N1   | C18  | C19  | 123.7(3) |
| C3   | C2   | C1   | 118.4(4) | N1   | C18  | C23  | 118.2(3) |
| C4   | C3   | C2   | 121.1(4) | C20  | C19  | C18  | 120.8(3) |
| C3   | C4   | C5   | 119.8(5) | C21  | C20  | C19  | 120.5(4) |
| C4   | C5   | C6   | 121.7(4) | O2   | C20  | C19  | 123.6(4) |
| C1   | C6   | C5   | 116.2(4) | O2   | C20  | C21  | 115.9(4) |
| C1   | C6   | C7   | 122.5(4) | C20  | C21  | C22  | 119.0(4) |
| C5   | C6   | C7   | 121.2(4) | C23  | C22  | C21  | 121.2(4) |
| C8   | C7   | C6   | 119.1(4) | C22  | C23  | C18  | 120.5(3) |
| C8   | C7   | C12  | 118.8(4) | C22  | C23  | O1   | 125.5(3) |
| C12  | C7   | C6   | 122.0(3) | O1   | C23  | C18  | 113.9(3) |
| C9   | C8   | C7   | 121.9(5) | O1   | C24  | C25  | 109.2(4) |
| C10  | C9   | C8   | 119.4(4) | C26  | C25  | C24  | 119.5(5) |
| C9   | C10  | C11  | 120.3(4) | C30  | C25  | C24  | 120.5(4) |
| C10  | C11  | C12  | 121.6(4) | C30  | C25  | C26  | 120.0(5) |
| C7   | C12  | C13  | 120.8(4) | C25  | C26  | C31  | 121.4(6) |



|      |     |      |           |      |      |      |          |
|------|-----|------|-----------|------|------|------|----------|
| C11  | C12 | C7   | 117.9(4)  | C27  | C26  | C25  | 118.9(6) |
| C11  | C12 | C13  | 121.1(4)  | C27  | C26  | C31  | 119.7(6) |
| C12  | C13 | C14  | 124.6(14) | C28  | C27  | C26  | 121.6(6) |
| C12  | C13 | C17  | 114.6(3)  | C27  | C28  | C29  | 120.7(6) |
| C12  | C13 | C14A | 110.4(8)  | C28  | C29  | C30  | 119.6(6) |
| C14  | C13 | C17  | 104.3(19) | C25  | C30  | C29  | 119.1(5) |
| C14A | C13 | C17  | 104.9(12) | C25  | C30  | C32  | 120.5(6) |
| C15  | C14 | C13  | 112(4)    | C29  | C30  | C32  | 120.4(6) |
| C14  | C15 | C16  | 105(4)    | C18  | N1   | C17  | 125.1(4) |
| C17  | C16 | C15  | 111(2)    | C23  | O1   | C24  | 117.1(3) |
| C13  | C17 | C16A | 100.3(6)  | C20  | O2   | C33  | 117.5(4) |
| C16  | C17 | C13  | 107.8(10) | C15A | C14A | C13  | 101(2)   |
| N1   | C17 | C13  | 113.1(3)  | C14A | C15A | C16A | 96(2)    |
| N1   | C17 | C16  | 123.4(10) | C15A | C16A | C17  | 97.0(18) |

**Table S31 Torsion Angles for 20210476.**

| A  | B   | C   | D    | Angle/°   | A   | B   | C    | D    | Angle/°   |
|----|-----|-----|------|-----------|-----|-----|------|------|-----------|
| C1 | C2  | C3  | C4   | -0.5(7)   | C17 | C13 | C14A | C15A | 28.0(17)  |
| C1 | C6  | C7  | C8   | 93.2(5)   | C18 | C19 | C20  | C21  | 1.3(6)    |
| C1 | C6  | C7  | C12  | -88.3(5)  | C18 | C19 | C20  | O2   | -177.8(4) |
| C2 | C1  | C6  | C5   | -0.1(6)   | C18 | C23 | O1   | C24  | -169.0(4) |
| C2 | C1  | C6  | C7   | -176.6(4) | C19 | C18 | C23  | C22  | 0.3(6)    |
| C2 | C3  | C4  | C5   | 0.7(8)    | C19 | C18 | C23  | O1   | -178.3(3) |
| C3 | C4  | C5  | C6   | -0.6(8)   | C19 | C18 | N1   | C17  | 16.8(7)   |
| C4 | C5  | C6  | C1   | 0.3(7)    | C19 | C20 | C21  | C22  | -0.8(6)   |
| C4 | C5  | C6  | C7   | 176.9(5)  | C19 | C20 | O2   | C33  | 6.9(6)    |
| C5 | C6  | C7  | C8   | -83.2(5)  | C20 | C21 | C22  | C23  | 0.1(7)    |
| C5 | C6  | C7  | C12  | 95.3(5)   | C21 | C20 | O2   | C33  | -172.2(4) |
| C6 | C1  | C2  | C3   | 0.1(6)    | C21 | C22 | C23  | C18  | 0.2(6)    |
| C6 | C7  | C8  | C9   | 179.2(4)  | C21 | C22 | C23  | O1   | 178.6(4)  |
| C6 | C7  | C12 | C11  | -177.9(4) | C22 | C23 | O1   | C24  | 12.5(6)   |
| C6 | C7  | C12 | C13  | -2.2(5)   | C23 | C18 | C19  | C20  | -1.0(6)   |
| C7 | C8  | C9  | C10  | -2.1(8)   | C23 | C18 | N1   | C17  | -165.1(4) |
| C7 | C12 | C13 | C14  | 134(2)    | C24 | C25 | C26  | C27  | 176.1(5)  |
| C7 | C12 | C13 | C17  | -95.8(4)  | C24 | C25 | C26  | C31  | -4.3(9)   |
| C7 | C12 | C13 | C14A | 146.0(13) | C24 | C25 | C30  | C29  | -176.5(4) |
| C8 | C7  | C12 | C11  | 0.7(6)    | C24 | C25 | C30  | C32  | 3.8(7)    |
| C8 | C7  | C12 | C13  | 176.3(4)  | C25 | C24 | O1   | C23  | 173.9(4)  |
| C8 | C9  | C10 | C11  | 2.2(8)    | C25 | C26 | C27  | C28  | 0.5(11)   |
| C9 | C10 | C11 | C12  | -0.9(8)   | C26 | C25 | C30  | C29  | 2.4(7)    |

|         |      |      |            |      |      |      |      |            |
|---------|------|------|------------|------|------|------|------|------------|
| C10C11  | C12  | C7   | -0.5(6)    | C26  | C25  | C30  | C32  | -177.3(5)  |
| C10C11  | C12  | C13  | -176.2(4)  | C26  | C27  | C28  | C29  | 2.2(11)    |
| C11C12  | C13  | C14  | -51(2)     | C27  | C28  | C29  | C30  | -2.5(10)   |
| C11C12  | C13  | C17  | 79.7(5)    | C28  | C29  | C30  | C25  | 0.2(8)     |
| C11C12  | C13  | C14A | -38.4(13)  | C28  | C29  | C30  | C32  | 179.9(6)   |
| C12C7   | C8   | C9   | 0.6(7)     | C30  | C25  | C26  | C27  | -2.8(9)    |
| C12C13  | C14  | C15  | 128(3)     | C30  | C25  | C26  | C31  | 176.8(6)   |
| C12C13  | C17  | C16  | -133.9(10) | C31  | C26  | C27  | C28  | -179.1(8)  |
| C12C13  | C17  | N1   | 6.0(5)     | C11  | C1   | C2   | C3   | 178.4(4)   |
| C12C13  | C17  | C16A | -111.1(7)  | C11  | C1   | C6   | C5   | -178.3(3)  |
| C12C13  | C14A | C15A | 151.9(14)  | C11  | C1   | C6   | C7   | 5.1(5)     |
| C13C14  | C15  | C16  | 5(5)       | N1   | C17  | C16A | C15A | -162.7(16) |
| C13C17  | N1   | C18  | 156.4(4)   | N1   | C18  | C19  | C20  | 177.0(4)   |
| C13C17  | C16A | C15A | -43.3(17)  | N1   | C18  | C23  | C22  | -177.9(4)  |
| C13C14A | C15A | C16A | -56(3)     | N1   | C18  | C23  | O1   | 3.6(5)     |
| C14C13  | C17  | C16  | 5.6(14)    | O1   | C24  | C25  | C26  | 94.7(6)    |
| C14C13  | C17  | N1   | 145.5(13)  | O1   | C24  | C25  | C30  | -86.3(5)   |
| C14C15  | C16  | C17  | -1(5)      | O2   | C20  | C21  | C22  | 178.3(4)   |
| C15C16  | C17  | C13  | -3(3)      | C14A | C13  | C17  | N1   | 127.2(8)   |
| C15C16  | C17  | N1   | -138(3)    | C14A | C13  | C17  | C16A | 10.1(8)    |
| C16C17  | N1   | C18  | -70.8(13)  | C14A | C15A | C16A | C17  | 62(2)      |
| C17C13  | C14  | C15  | -7(3)      | C16A | C17  | N1   | C18  | -92.4(8)   |

**Table S32 Hydrogen Atom Coordinates ( $\text{\AA}\times 10^4$ ) and Isotropic Displacement Parameters ( $\text{\AA}^2\times 10^3$ ) for 20210476.**

| Atom | x    | y     | z    | U(eq) |
|------|------|-------|------|-------|
| H2   | 8471 | 5096  | 2114 | 80    |
| H3   | 7737 | 7929  | 2222 | 88    |
| H4   | 5757 | 8418  | 2502 | 98    |
| H5   | 4487 | 6067  | 2707 | 89    |
| H8   | 5121 | 2653  | 3892 | 88    |
| H9   | 3882 | 325   | 4212 | 98    |
| H10  | 2797 | -1055 | 3231 | 95    |
| H11  | 3036 | -262  | 1917 | 85    |
| H13  | 5043 | 3060  | 1231 | 74    |
| H13A | 5102 | 2896  | 1157 | 74    |
| H14A | 5320 | 1269  | 312  | 103   |
| H14B | 4491 | -153  | 710  | 103   |
| H15A | 3106 | 294   | -180 | 104   |
| H15B | 3990 | 1591  | -623 | 104   |

|      |          |          |          |        |
|------|----------|----------|----------|--------|
| H16A | 2922     | 3870     | -226     | 90     |
| H16B | 2028     | 2576     | 200      | 90     |
| H17  | 3719     | 4657     | 820      | 68     |
| H17A | 3620     | 4597     | 675      | 68     |
| H19  | 1875     | 6232     | 416      | 66     |
| H21  | -189     | 9516     | 1689     | 77     |
| H22  | 264      | 7897     | 2834     | 75     |
| H24A | 178      | 5221     | 3591     | 86     |
| H24B | 1193     | 6515     | 3890     | 86     |
| H27  | 3268     | 3472     | 5775     | 132    |
| H28  | 2332     | 817      | 5862     | 129    |
| H29  | 904      | -5       | 4929     | 121    |
| H31A | 3095     | 6500     | 4248     | 204    |
| H31B | 3773     | 6043     | 5047     | 204    |
| H31C | 2538     | 7038     | 5069     | 204    |
| H32A | -706     | 2625     | 3735     | 172    |
| H32B | -319     | 634      | 3807     | 172    |
| H32C | 292      | 1867     | 3176     | 172    |
| H33A | 460      | 9122     | -880     | 125    |
| H33B | 527      | 7185     | -545     | 125    |
| H33C | 1665     | 8407     | -511     | 125    |
| H1   | 2560(40) | 3640(60) | 2020(30) | 53(11) |
| H14C | 5044     | 183      | 558      | 103    |
| H14D | 3737     | -242     | 869      | 103    |
| H15C | 3524     | 671      | -483     | 104    |
| H15D | 4240     | 2443     | -288     | 104    |
| H16C | 2143     | 1384     | 609      | 90     |
| H16D | 2094     | 2941     | -28      | 90     |

**Table S33 Atomic Occupancy for 20210476.**

| <b>Atom</b> | <b>Occupancy</b> | <b>Atom</b> | <b>Occupancy</b> | <b>Atom</b> | <b>Occupancy</b> |
|-------------|------------------|-------------|------------------|-------------|------------------|
| H13         | 0.408(19)        | H13A        | 0.592(19)        | C14         | 0.408(19)        |
| H14A        | 0.408(19)        | H14B        | 0.408(19)        | C15         | 0.408(19)        |
| H15A        | 0.408(19)        | H15B        | 0.408(19)        | C16         | 0.408(19)        |
| H16A        | 0.408(19)        | H16B        | 0.408(19)        | H17         | 0.408(19)        |
| H17A        | 0.592(19)        | C14A        | 0.592(19)        | H14C        | 0.592(19)        |
| H14D        | 0.592(19)        | C15A        | 0.592(19)        | H15C        | 0.592(19)        |
| H15D        | 0.592(19)        | C16A        | 0.592(19)        | H16C        | 0.592(19)        |
| H16D        | 0.592(19)        |             |                  |             |                  |

(4) Absolute configurations of **13**, **18**, **19**, **20** and **21** are determined by *X*-ray structure analysis of the product **13m**.

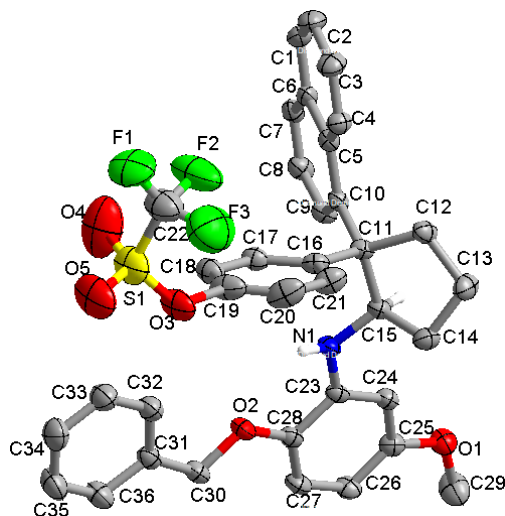

**Fig. S21.** Absolute configuration of **13m** (CCDC 2080355).

*Displacement ellipsoids are drawn at the 30% probability level.*

*(Solvent: diethyl ether/hexane = 1:1)*

**Table S34** Crystal data and structure refinement for **13m**.

|                                        |                                                                  |
|----------------------------------------|------------------------------------------------------------------|
| Identification code                    | <b>13m</b>                                                       |
| Empirical formula                      | C <sub>36</sub> H <sub>32</sub> F <sub>3</sub> NO <sub>5</sub> S |
| Formula weight                         | 647.68                                                           |
| Temperature/K                          | 293(2)                                                           |
| Crystal system                         | monoclinic                                                       |
| Space group                            | C2                                                               |
| <i>a</i> /Å                            | 29.3277(9)                                                       |
| <i>b</i> /Å                            | 7.49483(19)                                                      |
| <i>c</i> /Å                            | 18.2663(6)                                                       |
| $\alpha$ /°                            | 90                                                               |
| $\beta$ /°                             | 124.382(5)                                                       |
| $\gamma$ /°                            | 90                                                               |
| Volume/Å <sup>3</sup>                  | 3313.6(2)                                                        |
| <i>Z</i>                               | 4                                                                |
| $\rho_{\text{calc}}$ /cm <sup>3</sup>  | 1.298                                                            |
| $\mu$ /mm <sup>-1</sup>                | 1.378                                                            |
| <i>F</i> (000)                         | 1352.0                                                           |
| Crystal size/mm <sup>3</sup>           | 0.16 × 0.1 × 0.07                                                |
| Radiation                              | CuK $\alpha$ ( $\lambda$ = 1.54184)                              |
| 2 $\theta$ range for data collection/° | 7.304 to 141.744                                                 |

|                                             |                                                               |
|---------------------------------------------|---------------------------------------------------------------|
| Index ranges                                | -35 ≤ h ≤ 27, -7 ≤ k ≤ 9, -22 ≤ l ≤ 22                        |
| Reflections collected                       | 15762                                                         |
| Independent reflections                     | 5649 [R <sub>int</sub> = 0.0287, R <sub>sigma</sub> = 0.0295] |
| Data/restraints/parameters                  | 5649/89/446                                                   |
| Goodness-of-fit on F <sup>2</sup>           | 1.043                                                         |
| Final R indexes [I ≥ 2σ(I)]                 | R <sub>1</sub> = 0.0518, wR <sub>2</sub> = 0.1436             |
| Final R indexes [all data]                  | R <sub>1</sub> = 0.0580, wR <sub>2</sub> = 0.1521             |
| Largest diff. peak/hole / e Å <sup>-3</sup> | 0.25/-0.28                                                    |
| Flack parameter                             | -0.006(15)                                                    |

**Table S35 Fractional Atomic Coordinates (×10<sup>4</sup>) and Equivalent Isotropic Displacement Parameters (Å<sup>2</sup>×10<sup>3</sup>) for 13m. U<sub>eq</sub> is defined as 1/3 of of the trace of the orthogonalised U<sub>ij</sub> tensor.**

| Atom | x          | y        | z           | U(eq)     |
|------|------------|----------|-------------|-----------|
| S1   | 8549.0(10) | 3574(7)  | 10124.1(17) | 142.0(14) |
| S1A  | 8448(3)    | 5103(17) | 9846(5)     | 142.0(14) |
| F1   | 8349(4)    | 5621(16) | 11061(6)    | 186(4)    |
| F2   | 7681(4)    | 5050(20) | 9798(8)     | 226(6)    |
| F3   | 8222(7)    | 6623(18) | 9815(10)    | 250(6)    |
| F1A  | 8428(12)   | 4260(40) | 11203(16)   | 186(4)    |
| F2A  | 7731(11)   | 3580(60) | 10040(20)   | 226(6)    |
| F3A  | 8478(16)   | 2110(30) | 10410(20)   | 250(6)    |
| O1   | 5709.0(12) | -2066(4) | 2670.2(18)  | 71.0(8)   |
| O2   | 7502.2(9)  | -1740(4) | 6150.8(17)  | 61.2(7)   |
| O3   | 8362(4)    | 3495(19) | 9186(8)     | 110(4)    |
| O4   | 8262(6)    | 2000(20) | 10308(9)    | 240(7)    |
| O5   | 9115(3)    | 3777(19) | 10679(6)    | 182(5)    |
| O3A  | 8253(12)   | 4130(60) | 9020(20)    | 110(4)    |
| O4A  | 8483(13)   | 6980(30) | 10260(20)   | 240(7)    |
| O5A  | 9072(8)    | 4780(40) | 10371(18)   | 182(5)    |
| N1   | 6612.3(12) | 265(4)   | 5594(2)     | 54.1(7)   |
| C1   | 5203.9(17) | 1551(7)  | 7592(3)     | 68.3(11)  |
| C2   | 5328(2)    | 3220(8)  | 7915(3)     | 79.6(13)  |
| C3   | 5644(2)    | 4335(7)  | 7747(3)     | 77.3(12)  |
| C4   | 5819.9(17) | 3741(6)  | 7236(3)     | 62.5(9)   |
| C5   | 5679.4(13) | 2019(5)  | 6850(2)     | 50.0(7)   |
| C6   | 5372.0(13) | 879(5)   | 7055(2)     | 54.3(8)   |
| C7   | 5248.3(13) | -866(5)  | 6736(3)     | 59.2(9)   |
| C8   | 5405.9(15) | -1493(6) | 6218(3)     | 62.1(9)   |
| C9   | 5692.1(13) | -383(5)  | 5980(2)     | 54.2(8)   |
| C10  | 5834.6(12) | 1335(5)  | 6280(2)     | 46.9(7)   |

|      |            |           |           |           |
|------|------------|-----------|-----------|-----------|
| C11  | 6158.4(13) | 2513(5)   | 6039(2)   | 49.0(7)   |
| C12  | 5834.8(17) | 4267(6)   | 5559(3)   | 63.0(9)   |
| C13  | 5876(2)    | 4623(6)   | 4772(3)   | 75.4(12)  |
| C14  | 6283.9(17) | 3259(6)   | 4851(3)   | 65.0(10)  |
| C15  | 6205.5(13) | 1662(5)   | 5293(2)   | 49.8(7)   |
| C16  | 6736.5(14) | 2857(6)   | 6867(2)   | 56.5(9)   |
| C17  | 6994.3(15) | 1561(6)   | 7519(3)   | 61.9(9)   |
| C18  | 7519.1(17) | 1777(8)   | 8284(3)   | 79.5(13)  |
| C19  | 7780.9(18) | 3389(10)  | 8386(3)   | 94.8(19)  |
| C20  | 7552(2)    | 4684(10)  | 7768(4)   | 99.3(19)  |
| C21  | 7026(2)    | 4442(7)   | 7005(3)   | 79.1(13)  |
| C22  | 8230(5)    | 5300(20)  | 10302(9)  | 140(4)    |
| C23  | 6617.8(12) | -818(5)   | 4978(2)   | 48.2(7)   |
| C24  | 6181.0(13) | -917(5)   | 4098(2)   | 52.2(8)   |
| C25  | 6185.8(15) | -2090(5)  | 3512(2)   | 57.5(8)   |
| C26  | 6644.7(16) | -3116(6)  | 3792(3)   | 62.9(9)   |
| C27  | 7090.9(15) | -3010(6)  | 4669(3)   | 60.8(9)   |
| C28  | 7084.8(13) | -1917(5)  | 5271(2)   | 51.2(8)   |
| C29  | 5691(3)    | -3137(9)  | 2014(3)   | 102.4(19) |
| C30  | 7982.8(14) | -2768(6)  | 6468(3)   | 61.6(10)  |
| C31  | 8401.6(15) | -2396(6)  | 7430(3)   | 60.4(9)   |
| C32  | 8318.1(17) | -1221(7)  | 7922(3)   | 76.2(12)  |
| C33  | 8718(2)    | -978(9)   | 8812(3)   | 91.0(16)  |
| C34  | 9205(2)    | -1874(10) | 9224(3)   | 98.5(17)  |
| C35  | 9297(2)    | -3044(9)  | 8736(4)   | 99.3(18)  |
| C36  | 8901.0(18) | -3290(8)  | 7861(3)   | 81.9(13)  |
| C22A | 8287(12)   | 3770(30)  | 10457(19) | 140(4)    |

**Table S36 Anisotropic Displacement Parameters ( $\text{\AA}^2 \times 10^3$ ) for 13m. The Anisotropic displacement factor exponent takes the form:  $-2\pi^2[h^2a^2U_{11}+2hka*b*U_{12}+\dots]$ .**

| Atom | U <sub>11</sub> | U <sub>22</sub> | U <sub>33</sub> | U <sub>23</sub> | U <sub>13</sub> | U <sub>12</sub> |
|------|-----------------|-----------------|-----------------|-----------------|-----------------|-----------------|
| S1   | 84.0(12)        | 209(4)          | 76.1(13)        | -36.7(18)       | 10.5(10)        | -3(2)           |
| S1A  | 84.0(12)        | 209(4)          | 76.1(13)        | -36.7(18)       | 10.5(10)        | -3(2)           |
| F1   | 182(5)          | 253(11)         | 121(4)          | -85(7)          | 85(4)           | -26(8)          |
| F2   | 122(4)          | 357(15)         | 174(7)          | -104(10)        | 70(5)           | 21(8)           |
| F3   | 278(12)         | 216(10)         | 285(13)         | 15(9)           | 177(10)         | 29(9)           |
| F1A  | 182(5)          | 253(11)         | 121(4)          | -85(7)          | 85(4)           | -26(8)          |
| F2A  | 122(4)          | 357(15)         | 174(7)          | -104(10)        | 70(5)           | 21(8)           |
| F3A  | 278(12)         | 216(10)         | 285(13)         | 15(9)           | 177(10)         | 29(9)           |
| O1   | 70.8(16)        | 67.2(19)        | 65.2(15)        | -13.4(14)       | 32.5(13)        | 1.8(14)         |

|     |          |          |          |           |          |           |
|-----|----------|----------|----------|-----------|----------|-----------|
| O2  | 47.4(11) | 65.3(18) | 69.5(14) | -5.0(13)  | 32.2(11) | 9.4(11)   |
| O3  | 51(5)    | 159(12)  | 87(5)    | -39(6)    | 18(4)    | -11(4)    |
| O4  | 201(11)  | 234(11)  | 152(7)   | -9(8)     | 20(7)    | -78(10)   |
| O5  | 93(3)    | 254(13)  | 112(7)   | -63(7)    | 5(4)     | -1(6)     |
| O3A | 51(5)    | 159(12)  | 87(5)    | -39(6)    | 18(4)    | -11(4)    |
| O4A | 201(11)  | 234(11)  | 152(7)   | -9(8)     | 20(7)    | -78(10)   |
| O5A | 93(3)    | 254(13)  | 112(7)   | -63(7)    | 5(4)     | -1(6)     |
| N1  | 46.0(14) | 60(2)    | 57.1(15) | -4.8(14)  | 29.5(13) | 7.8(13)   |
| C1  | 67(2)    | 85(3)    | 68(2)    | 16(2)     | 47.9(18) | 11(2)     |
| C2  | 94(3)    | 93(4)    | 78(3)    | 2(2)      | 65(2)    | 13(3)     |
| C3  | 99(3)    | 74(3)    | 76(2)    | -10(2)    | 59(2)    | 3(2)      |
| C4  | 73(2)    | 57(2)    | 71(2)    | 0.2(18)   | 48.6(18) | 0.5(18)   |
| C5  | 46.7(15) | 52(2)    | 51.7(15) | 4.6(14)   | 28.0(13) | 6.8(13)   |
| C6  | 46.0(15) | 62(2)    | 59.2(18) | 13.7(16)  | 31.9(14) | 9.4(15)   |
| C7  | 48.4(16) | 56(2)    | 74(2)    | 15.2(18)  | 34.9(16) | 4.1(15)   |
| C8  | 55.1(18) | 49(2)    | 85(2)    | 0.2(18)   | 41.4(18) | -2.1(15)  |
| C9  | 50.1(16) | 48(2)    | 70(2)    | -4.7(16)  | 37.0(16) | -0.4(14)  |
| C10 | 38.3(13) | 46.6(19) | 54.9(15) | 1.1(14)   | 25.9(12) | 3.0(12)   |
| C11 | 48.5(15) | 46(2)    | 60.8(17) | -4.5(15)  | 36.1(14) | -1.2(14)  |
| C12 | 72(2)    | 50(2)    | 84(2)    | 6.9(19)   | 54(2)    | 9.4(18)   |
| C13 | 108(3)   | 54(3)    | 84(3)    | 12(2)     | 66(3)    | 15(2)     |
| C14 | 76(2)    | 65(3)    | 74(2)    | -1.3(19)  | 53.9(19) | -3.6(19)  |
| C15 | 47.9(15) | 50(2)    | 57.3(16) | -2.1(15)  | 33.1(13) | 3.9(13)   |
| C16 | 54.8(17) | 62(2)    | 63.9(19) | -13.5(17) | 40.5(16) | -10.1(16) |
| C17 | 53.4(18) | 66(3)    | 67(2)    | -11.0(19) | 33.8(16) | -5.5(17)  |
| C18 | 58(2)    | 104(4)   | 67(2)    | -16(2)    | 29.6(18) | 2(2)      |
| C19 | 58(2)    | 149(6)   | 77(3)    | -49(3)    | 37(2)    | -34(3)    |
| C20 | 96(3)    | 117(5)   | 94(3)    | -40(3)    | 59(3)    | -62(4)    |
| C21 | 86(3)    | 76(3)    | 84(3)    | -21(2)    | 54(2)    | -34(2)    |
| C22 | 116(5)   | 175(9)   | 121(6)   | -33(7)    | 62(5)    | 10(6)     |
| C23 | 46.9(15) | 45.4(19) | 62.9(17) | -1.1(15)  | 37.4(14) | -2.7(13)  |
| C24 | 47.7(15) | 49(2)    | 65.2(18) | -0.6(15)  | 35.2(15) | 2.1(14)   |
| C25 | 61.7(19) | 51(2)    | 65.7(19) | -5.4(17)  | 39.5(16) | -5.3(16)  |
| C26 | 69(2)    | 54(2)    | 68(2)    | -12.4(18) | 41.0(18) | 2.4(18)   |
| C27 | 58.3(18) | 52(2)    | 79(2)    | -3.4(18)  | 43.4(18) | 8.3(16)   |
| C28 | 47.9(15) | 49(2)    | 62.8(18) | -1.1(15)  | 34.8(14) | -1.5(13)  |
| C29 | 100(4)   | 96(4)    | 78(3)    | -30(3)    | 30(3)    | 9(3)      |
| C30 | 50.3(17) | 62(3)    | 76(2)    | 0.7(18)   | 37.4(17) | 9.3(16)   |
| C31 | 51.9(17) | 59(2)    | 75(2)    | 6.0(18)   | 38.3(17) | 2.7(16)   |
| C32 | 61(2)    | 90(4)    | 76(2)    | 2(2)      | 37.5(19) | 11(2)     |

|      |        |        |        |        |       |       |
|------|--------|--------|--------|--------|-------|-------|
| C33  | 81(3)  | 114(5) | 75(3)  | -4(3)  | 42(2) | 12(3) |
| C34  | 75(3)  | 121(5) | 73(3)  | 6(3)   | 26(2) | 9(3)  |
| C35  | 72(3)  | 105(5) | 91(3)  | 5(3)   | 28(3) | 28(3) |
| C36  | 60(2)  | 83(3)  | 88(3)  | -7(3)  | 34(2) | 12(2) |
| C22A | 116(5) | 175(9) | 121(6) | -33(7) | 62(5) | 10(6) |

**Table S37 Bond Lengths for 13m.**

| Atom | Atom | Length/Å  | Atom | Atom | Length/Å |
|------|------|-----------|------|------|----------|
| S1   | O3   | 1.476(14) | C7   | C8   | 1.350(6) |
| S1   | O4   | 1.591(14) | C8   | C9   | 1.413(5) |
| S1   | O5   | 1.380(9)  | C9   | C10  | 1.369(5) |
| S1   | C22  | 1.731(13) | C10  | C11  | 1.532(4) |
| S1A  | O3A  | 1.47(4)   | C11  | C12  | 1.568(5) |
| S1A  | O4A  | 1.574(17) | C11  | C15  | 1.580(4) |
| S1A  | O5A  | 1.534(18) | C11  | C16  | 1.527(5) |
| S1A  | C22A | 1.75(2)   | C12  | C13  | 1.533(5) |
| F1   | C22  | 1.248(14) | C13  | C14  | 1.517(6) |
| F2   | C22  | 1.343(16) | C14  | C15  | 1.532(5) |
| F3   | C22  | 1.322(19) | C16  | C17  | 1.385(6) |
| F1A  | C22A | 1.24(3)   | C16  | C21  | 1.398(6) |
| F2A  | C22A | 1.36(4)   | C17  | C18  | 1.385(6) |
| F3A  | C22A | 1.389(18) | C18  | C19  | 1.387(9) |
| O1   | C25  | 1.376(5)  | C19  | C20  | 1.345(9) |
| O1   | C29  | 1.418(6)  | C20  | C21  | 1.387(7) |
| O2   | C28  | 1.370(4)  | C23  | C24  | 1.380(5) |
| O2   | C30  | 1.412(4)  | C23  | C28  | 1.419(5) |
| O3   | C19  | 1.496(10) | C24  | C25  | 1.390(5) |
| O3A  | C19  | 1.33(4)   | C25  | C26  | 1.374(5) |
| N1   | C15  | 1.443(4)  | C26  | C27  | 1.386(5) |
| N1   | C23  | 1.395(4)  | C27  | C28  | 1.379(5) |
| C1   | C2   | 1.343(7)  | C30  | C31  | 1.495(6) |
| C1   | C6   | 1.415(5)  | C31  | C32  | 1.376(6) |
| C2   | C3   | 1.404(7)  | C31  | C36  | 1.383(6) |
| C3   | C4   | 1.371(5)  | C32  | C33  | 1.378(6) |
| C4   | C5   | 1.416(6)  | C33  | C34  | 1.358(8) |
| C5   | C6   | 1.437(5)  | C34  | C35  | 1.381(8) |
| C5   | C10  | 1.446(5)  | C35  | C36  | 1.358(7) |
| C6   | C7   | 1.394(6)  |      |      |          |

**Table S38 Bond Angles for 13m.**



| Atom | Atom | Atom | Angle/°   | Atom | Atom | Atom | Angle/°   |
|------|------|------|-----------|------|------|------|-----------|
| O3   | S1   | O4   | 108.8(8)  | C17  | C16  | C11  | 119.6(3)  |
| O3   | S1   | C22  | 111.2(6)  | C17  | C16  | C21  | 117.4(4)  |
| O4   | S1   | C22  | 96.3(9)   | C21  | C16  | C11  | 123.0(4)  |
| O5   | S1   | O3   | 111.1(7)  | C16  | C17  | C18  | 122.8(5)  |
| O5   | S1   | O4   | 119.1(8)  | C17  | C18  | C19  | 116.9(5)  |
| O5   | S1   | C22  | 109.4(7)  | O3A  | C19  | C18  | 135(2)    |
| O3A  | S1A  | O4A  | 145(2)    | O3A  | C19  | C20  | 102.3(19) |
| O3A  | S1A  | O5A  | 101.4(17) | C18  | C19  | O3   | 114.6(8)  |
| O3A  | S1A  | C22A | 106(2)    | C20  | C19  | O3   | 122.4(8)  |
| O4A  | S1A  | C22A | 99.9(15)  | C20  | C19  | C18  | 122.7(4)  |
| O5A  | S1A  | O4A  | 96.3(13)  | C19  | C20  | C21  | 119.6(5)  |
| O5A  | S1A  | C22A | 99.6(13)  | C20  | C21  | C16  | 120.6(5)  |
| C25  | O1   | C29  | 117.8(3)  | F1   | C22  | S1   | 120.7(12) |
| C28  | O2   | C30  | 116.9(3)  | F1   | C22  | F2   | 105.2(11) |
| S1   | O3   | C19  | 127.4(10) | F1   | C22  | F3   | 119.3(15) |
| C19  | O3A  | S1A  | 136(3)    | F2   | C22  | S1   | 109.6(10) |
| C23  | N1   | C15  | 119.8(3)  | F3   | C22  | S1   | 104.0(10) |
| C2   | C1   | C6   | 121.4(4)  | F3   | C22  | F2   | 94.8(13)  |
| C1   | C2   | C3   | 120.5(4)  | N1   | C23  | C28  | 118.8(3)  |
| C4   | C3   | C2   | 120.3(5)  | C24  | C23  | N1   | 123.0(3)  |
| C3   | C4   | C5   | 121.3(4)  | C24  | C23  | C28  | 118.1(3)  |
| C4   | C5   | C6   | 117.4(3)  | C23  | C24  | C25  | 121.6(3)  |
| C4   | C5   | C10  | 124.1(3)  | O1   | C25  | C24  | 114.0(3)  |
| C6   | C5   | C10  | 118.4(3)  | C26  | C25  | O1   | 125.9(3)  |
| C1   | C6   | C5   | 119.0(4)  | C26  | C25  | C24  | 120.1(3)  |
| C7   | C6   | C1   | 120.9(4)  | C25  | C26  | C27  | 119.0(3)  |
| C7   | C6   | C5   | 120.1(3)  | C28  | C27  | C26  | 121.9(3)  |
| C8   | C7   | C6   | 120.5(3)  | O2   | C28  | C23  | 114.8(3)  |
| C7   | C8   | C9   | 120.6(4)  | O2   | C28  | C27  | 126.0(3)  |
| C10  | C9   | C8   | 122.1(3)  | C27  | C28  | C23  | 119.2(3)  |
| C5   | C10  | C11  | 120.1(3)  | O2   | C30  | C31  | 110.4(3)  |
| C9   | C10  | C5   | 118.2(3)  | C32  | C31  | C30  | 123.8(3)  |
| C9   | C10  | C11  | 121.7(3)  | C32  | C31  | C36  | 117.4(4)  |
| C10  | C11  | C12  | 111.5(3)  | C36  | C31  | C30  | 118.8(4)  |
| C10  | C11  | C15  | 112.7(3)  | C31  | C32  | C33  | 120.6(4)  |
| C12  | C11  | C15  | 100.2(3)  | C34  | C33  | C32  | 121.1(5)  |
| C16  | C11  | C10  | 109.6(3)  | C33  | C34  | C35  | 119.0(5)  |
| C16  | C11  | C12  | 113.2(3)  | C36  | C35  | C34  | 119.9(5)  |
| C16  | C11  | C15  | 109.5(2)  | C35  | C36  | C31  | 122.1(5)  |

|     |     |     |          |     |      |     |           |
|-----|-----|-----|----------|-----|------|-----|-----------|
| C13 | C12 | C11 | 109.1(3) | F1A | C22A | S1A | 119(2)    |
| C14 | C13 | C12 | 105.6(3) | F1A | C22A | F2A | 101(2)    |
| C13 | C14 | C15 | 103.4(3) | F1A | C22A | F3A | 116(3)    |
| N1  | C15 | C11 | 114.8(3) | F2A | C22A | S1A | 112(3)    |
| N1  | C15 | C14 | 115.5(3) | F2A | C22A | F3A | 106(3)    |
| C14 | C15 | C11 | 104.5(3) | F3A | C22A | S1A | 102.4(17) |

**Table S39 Torsion Angles for 13m.**

| A      | B       | C   | D   | Angle/°    | A   | B   | C   | D   | Angle/°   |
|--------|---------|-----|-----|------------|-----|-----|-----|-----|-----------|
| S1     | O3      | C19 | C18 | -69.9(12)  | C10 | C5  | C6  | C1  | -178.2(3) |
| S1     | O3      | C19 | C20 | 116.7(12)  | C10 | C5  | C6  | C7  | 2.5(5)    |
| S1A    | O3A     | C19 | C18 | -82(4)     | C10 | C11 | C12 | C13 | -136.7(4) |
| S1A    | O3A     | C19 | C20 | 96(4)      | C10 | C11 | C15 | N1  | -77.8(4)  |
| O1     | C25     | C26 | C27 | -178.9(4)  | C10 | C11 | C15 | C14 | 154.6(3)  |
| O2     | C30     | C31 | C32 | 0.5(6)     | C10 | C11 | C16 | C17 | 32.4(4)   |
| O2     | C30     | C31 | C36 | 179.7(4)   | C10 | C11 | C16 | C21 | -147.7(3) |
| O3     | S1      | C22 | F1  | -177.5(13) | C11 | C12 | C13 | C14 | -7.6(5)   |
| O3     | S1      | C22 | F2  | 60.2(15)   | C11 | C16 | C17 | C18 | 179.6(3)  |
| O3     | S1      | C22 | F3  | -40.2(14)  | C11 | C16 | C21 | C20 | -179.8(4) |
| O3     | C19     | C20 | C21 | 174.7(7)   | C12 | C11 | C15 | N1  | 163.6(3)  |
| O4     | S1      | O3  | C19 | 50.8(15)   | C12 | C11 | C15 | C14 | 36.0(3)   |
| O4     | S1      | C22 | F1  | 69.6(14)   | C12 | C11 | C16 | C17 | 157.6(3)  |
| O4     | S1      | C22 | F2  | -52.8(12)  | C12 | C11 | C16 | C21 | -22.5(4)  |
| O4     | S1      | C22 | F3  | -153.1(11) | C12 | C13 | C14 | C15 | 30.5(5)   |
| O5     | S1      | O3  | C19 | -176.2(11) | C13 | C14 | C15 | N1  | -169.4(3) |
| O5     | S1      | C22 | F1  | -54.4(15)  | C13 | C14 | C15 | C11 | -42.3(4)  |
| O5     | S1      | C22 | F2  | -176.7(11) | C15 | N1  | C23 | C24 | -15.5(5)  |
| O5     | S1      | C22 | F3  | 83.0(12)   | C15 | N1  | C23 | C28 | 166.7(3)  |
| O3AS1A | C22AF1A |     |     | 177(2)     | C15 | C11 | C12 | C13 | -17.3(4)  |
| O3AS1A | C22AF2A |     |     | -65(2)     | C15 | C11 | C16 | C17 | -91.6(4)  |
| O3AS1A | C22AF3A |     |     | 48(3)      | C15 | C11 | C16 | C21 | 88.3(4)   |
| O3AC19 | C20     | C21 |     | -176.3(18) | C16 | C11 | C12 | C13 | 99.2(4)   |
| O4AS1A | O3A     | C19 |     | -84(6)     | C16 | C11 | C15 | N1  | 44.4(4)   |
| O4AS1A | C22AF1A |     |     | -26(3)     | C16 | C11 | C15 | C14 | -83.2(3)  |
| O4AS1A | C22AF2A |     |     | 92(2)      | C16 | C17 | C18 | C19 | 1.1(6)    |
| O4AS1A | C22AF3A |     |     | -155(2)    | C17 | C16 | C21 | C20 | 0.1(6)    |
| O5AS1A | O3A     | C19 |     | 156(4)     | C17 | C18 | C19 | O3  | -175.3(7) |
| O5AS1A | C22AF1A |     |     | 72(3)      | C17 | C18 | C19 | O3A | 175(2)    |
| O5AS1A | C22AF2A |     |     | -170(2)    | C17 | C18 | C19 | C20 | -1.9(7)   |
| O5AS1A | C22AF3A |     |     | -57(3)     | C18 | C19 | C20 | C21 | 1.8(8)    |

|    |     |     |     |           |      |     |     |     |           |
|----|-----|-----|-----|-----------|------|-----|-----|-----|-----------|
| N1 | C23 | C24 | C25 | -176.0(3) | C19  | C20 | C21 | C16 | -0.8(8)   |
| N1 | C23 | C28 | O2  | -2.4(4)   | C21  | C16 | C17 | C18 | -0.3(6)   |
| N1 | C23 | C28 | C27 | 179.1(3)  | C22  | S1  | O3  | C19 | -54.0(15) |
| C1 | C2  | C3  | C4  | 1.2(7)    | C23  | N1  | C15 | C11 | 167.5(3)  |
| C1 | C6  | C7  | C8  | 179.4(4)  | C23  | N1  | C15 | C14 | -70.7(4)  |
| C2 | C1  | C6  | C5  | -0.4(6)   | C23  | C24 | C25 | O1  | 177.6(3)  |
| C2 | C1  | C6  | C7  | 178.9(4)  | C23  | C24 | C25 | C26 | -3.6(6)   |
| C2 | C3  | C4  | C5  | 1.5(7)    | C24  | C23 | C28 | O2  | 179.8(3)  |
| C3 | C4  | C5  | C6  | -3.5(5)   | C24  | C23 | C28 | C27 | 1.2(5)    |
| C3 | C4  | C5  | C10 | 177.7(4)  | C24  | C25 | C26 | C27 | 2.4(6)    |
| C4 | C5  | C6  | C1  | 2.9(5)    | C25  | C26 | C27 | C28 | 0.6(6)    |
| C4 | C5  | C6  | C7  | -176.4(3) | C26  | C27 | C28 | O2  | 179.2(4)  |
| C4 | C5  | C10 | C9  | 177.2(3)  | C26  | C27 | C28 | C23 | -2.4(6)   |
| C4 | C5  | C10 | C11 | -1.7(5)   | C28  | O2  | C30 | C31 | 178.7(3)  |
| C5 | C6  | C7  | C8  | -1.3(5)   | C28  | C23 | C24 | C25 | 1.7(5)    |
| C5 | C10 | C11 | C12 | -58.9(4)  | C29  | O1  | C25 | C24 | 176.1(4)  |
| C5 | C10 | C11 | C15 | -170.6(3) | C29  | O1  | C25 | C26 | -2.7(7)   |
| C5 | C10 | C11 | C16 | 67.2(4)   | C30  | O2  | C28 | C23 | -178.2(3) |
| C6 | C1  | C2  | C3  | -1.7(7)   | C30  | O2  | C28 | C27 | 0.2(5)    |
| C6 | C5  | C10 | C9  | -1.5(4)   | C30  | C31 | C32 | C33 | 178.3(5)  |
| C6 | C5  | C10 | C11 | 179.5(3)  | C30  | C31 | C36 | C35 | -178.8(5) |
| C6 | C7  | C8  | C9  | -0.9(6)   | C31  | C32 | C33 | C34 | 0.6(9)    |
| C7 | C8  | C9  | C10 | 1.9(6)    | C32  | C31 | C36 | C35 | 0.5(8)    |
| C8 | C9  | C10 | C5  | -0.6(5)   | C32  | C33 | C34 | C35 | 0.1(10)   |
| C8 | C9  | C10 | C11 | 178.3(3)  | C33  | C34 | C35 | C36 | -0.5(11)  |
| C9 | C10 | C11 | C12 | 122.2(3)  | C34  | C35 | C36 | C31 | 0.3(10)   |
| C9 | C10 | C11 | C15 | 10.4(4)   | C36  | C31 | C32 | C33 | -0.9(7)   |
| C9 | C10 | C11 | C16 | -111.7(4) | C22A | S1A | O3A | C19 | 53(4)     |

**Table S40 Hydrogen Atom Coordinates ( $\text{\AA}\times 10^4$ ) and Isotropic Displacement Parameters ( $\text{\AA}^2\times 10^3$ ) for 13m.**

| Atom | x        | y       | z        | U(eq)  |
|------|----------|---------|----------|--------|
| H1   | 6923(18) | 510(60) | 6080(30) | 58(11) |
| H1A  | 5003     | 820     | 7724     | 82     |
| H2   | 5205     | 3641    | 8253     | 95     |
| H3   | 5734     | 5481    | 7983     | 93     |
| H4   | 6036     | 4484    | 7141     | 75     |
| H7   | 5056     | -1605   | 6881     | 71     |
| H8   | 5325     | -2665   | 6016     | 74     |
| H9   | 5787     | -834    | 5609     | 65     |

|      |      |       |      |     |
|------|------|-------|------|-----|
| H12A | 5450 | 4141  | 5351 | 76  |
| H12B | 5991 | 5262  | 5970 | 76  |
| H13A | 5519 | 4480  | 4216 | 90  |
| H13B | 6008 | 5825  | 4801 | 90  |
| H14A | 6659 | 3707  | 5215 | 78  |
| H14B | 6199 | 2940  | 4272 | 78  |
| H15  | 5846 | 1133  | 4851 | 60  |
| H17  | 6807 | 500   | 7439 | 74  |
| H18  | 7688 | 882   | 8710 | 95  |
| H20  | 7744 | 5735  | 7853 | 119 |
| H21  | 6866 | 5342  | 6581 | 95  |
| H24  | 5876 | -182  | 3892 | 63  |
| H26  | 6656 | -3870 | 3398 | 75  |
| H27  | 7403 | -3695 | 4858 | 73  |
| H29A | 5348 | -2939 | 1452 | 154 |
| H29B | 5720 | -4372 | 2174 | 154 |
| H29C | 5993 | -2824 | 1972 | 154 |
| H30A | 8137 | -2485 | 6132 | 74  |
| H30B | 7888 | -4026 | 6387 | 74  |
| H32  | 7989 | -585  | 7652 | 91  |
| H33  | 8653 | -187  | 9136 | 109 |
| H34  | 9472 | -1704 | 9826 | 118 |
| H35  | 9629 | -3661 | 9007 | 119 |
| H36  | 8968 | -4085 | 7540 | 98  |

**Table S41 Atomic Occupancy for 13m.**

| <b>Atom</b> | <b>Occupancy</b> | <b>Atom</b> | <b>Occupancy</b> | <b>Atom</b> | <b>Occupancy</b> |
|-------------|------------------|-------------|------------------|-------------|------------------|
| S1          | 0.718(4)         | S1A         | 0.282(4)         | F1          | 0.718(4)         |
| F2          | 0.718(4)         | F3          | 0.718(4)         | F1A         | 0.282(4)         |
| F2A         | 0.282(4)         | F3A         | 0.282(4)         | O3          | 0.718(4)         |
| O4          | 0.718(4)         | O5          | 0.718(4)         | O3A         | 0.282(4)         |
| O4A         | 0.282(4)         | O5A         | 0.282(4)         | C22         | 0.718(4)         |
| C22A        | 0.282(4)         |             |                  |             |                  |

## 7. Characterization of adducts

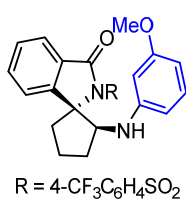

**3e**: white solid; Mp 76.5 - 77.7 °C; 49.0 mg, 95% yield; 94% ee; dr > 19:1;  $[\alpha]_D^{22} +104.8$  (*c* 1.0, CHCl<sub>3</sub>); <sup>1</sup>H NMR (300 MHz, CDCl<sub>3</sub>) δ 8.15 (d, *J* = 8.2 Hz, 2H), 7.80 (d, *J* = 7.7 Hz, 1H), 7.74 (t, *J* = 7.5 Hz, 1H), 7.86 – 7.44 (m, 4H), 6.99 (t, *J* = 8.1 Hz, 1H), 6.27 (d, *J* = 8.1 Hz, 1H), 6.01 (d, *J* = 8.1 Hz, 1H), 5.95 (s, 1H), 5.16 (dd, *J* = 10.7, 7.8 Hz, 1H), 3.70 (s, 3H), 3.21 – 3.07 (m, 1H), 2.76 – 2.61 (m, 1H), 2.40 – 2.22 (m, 2H), 2.16 – 2.06 (m, 1H), 1.86 – 1.74 (m, 1H); <sup>13</sup>C NMR (75 MHz, CDCl<sub>3</sub>) δ 166.7, 160.8, 148.4, 147.8, 142.5, 135.1 (q, *J* = 33.2 Hz), 134.7, 130.1, 129.4, 129.1, 126.7 (q, *J* = 273.6 Hz), 125.8 (q, *J* = 3.5 Hz), 125.2, 122.6, 106.6, 103.6, 99.8, 79.1, 59.8, 55.1, 34.8, 31.0, 19.9; <sup>19</sup>F NMR (376 MHz, CDCl<sub>3</sub>) δ –63.3; HRMS (ESI) *m/z* 539.1224 (M+Na<sup>+</sup>), calc. for C<sub>26</sub>H<sub>23</sub>F<sub>3</sub>N<sub>2</sub>O<sub>4</sub>SNa<sup>+</sup> 539.1223.

The ee was determined by HPLC analysis: CHIRALPAK IA (4.6 mm i.d. x 250 mm); Hexane/2-propanol = 80/20; flow rate: 1.0 mL/min; 25 °C; 210 nm; retention time: 14.0 min (minor) and 26.9 min (major).

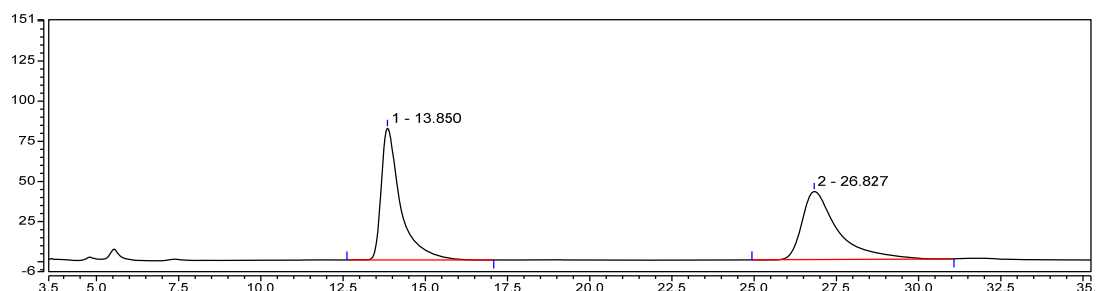

| Entry | Retention Time | Area    | Height | %Area |
|-------|----------------|---------|--------|-------|
| 1     | 13.850         | 55.4073 | 82.06  | 50.95 |
| 2     | 26.827         | 53.3420 | 42.46  | 49.05 |

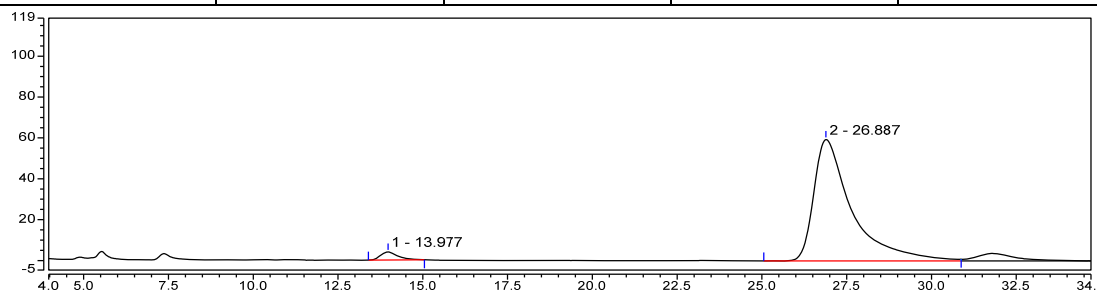

| Entry | Retention Time | Area    | Height | %Area |
|-------|----------------|---------|--------|-------|
| 1     | 13.977         | 2.3475  | 3.95   | 2.95  |
| 2     | 26.887         | 77.2458 | 59.41  | 97.05 |

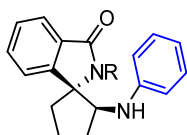

R = 4-CF<sub>3</sub>C<sub>6</sub>H<sub>4</sub>SO<sub>2</sub>

**3f**: white solid; Mp 93.5 - 94.3 °C; 45.2 mg, 93% yield; 90% ee; dr > 19:1;

$[\alpha]_D^{22}$  -38.5 (*c* 1.0, CHCl<sub>3</sub>); <sup>1</sup>H NMR (300 MHz, CDCl<sub>3</sub>) δ 8.12 (d, *J* = 8.2

Hz, 2H), 7.83 – 7.67 (m, 2H), 7.60 – 7.38 (m, 4H), 7.09 (t, *J* = 7.8 Hz, 2H),

6.71 (t, *J* = 7.3 Hz, 1H), 6.41 (d, *J* = 7.9 Hz, 2H), 5.20 (dd, *J* = 10.9, 7.7 Hz,

1H), 3.21 – 3.06 (m, 1H), 2.74 – 2.62 (m, 1H), 2.40 – 2.20 (m, 2H), 2.18 – 2.04 (m, 1H), 1.87

– 1.72 (m, 1H); <sup>13</sup>C NMR (75 MHz, CDCl<sub>3</sub>) δ 166.6, 148.4, 146.3, 142.4, 135.1 (q, *J* = 33.2

Hz), 134.7, 129.4, 129.3, 129.0, 128.2, 125.7 (q, *J* = 3.6 Hz, 1H), 125.7, 125.6, 125.1, 123.0

(q, *J* = 273.2 Hz), 122.6, 118.4, 113.6, 79.1, 59.6, 34.8, 30.9, 19.8; <sup>19</sup>F NMR (376 MHz,

CDCl<sub>3</sub>) δ -63.4; HRMS (ESI) *m/z* 509.1115 (M+Na<sup>+</sup>), calc. for C<sub>25</sub>H<sub>21</sub>F<sub>3</sub>N<sub>2</sub>O<sub>3</sub>SNa<sup>+</sup> 509.1117.

The ee was determined by HPLC analysis: CHIRAL INB (4.6 mm i.d. x 250 mm);

Hexane/2-propanol = 85/15; flow rate: 1.0 mL/min; 25 °C; 254 nm; retention time: 14.4 min

(major) and 18.7 min (minor).

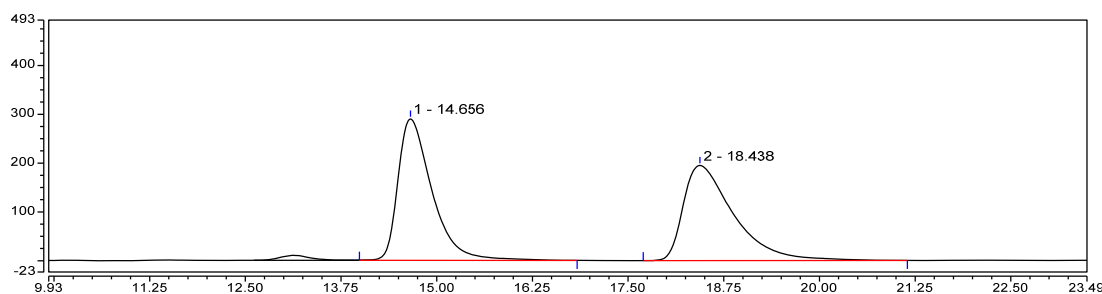

| Entry | Retention Time | Area     | Height | %Area |
|-------|----------------|----------|--------|-------|
| 1     | 14.656         | 149.3852 | 289.67 | 50.17 |
| 2     | 18.438         | 148.3553 | 194.88 | 49.83 |

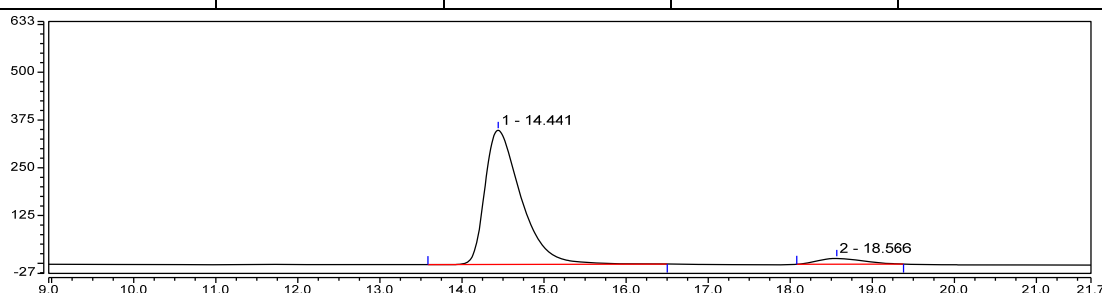

| Entry | Retention Time | Area     | Height | %Area |
|-------|----------------|----------|--------|-------|
| 1     | 14.441         | 178.5643 | 351.18 | 94.89 |
| 2     | 18.566         | 9.6174   | 15.21  | 5.11  |

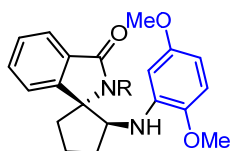

R = 4-CF<sub>3</sub>C<sub>6</sub>H<sub>4</sub>SO<sub>2</sub>

**3g**: white solid; Mp 75.0 – 76.1 °C; 43.7 mg, 80% yield; 94% ee; dr >

19:1; [α]<sub>D</sub><sup>22</sup> +41.9 (c 1.0, CHCl<sub>3</sub>); <sup>1</sup>H NMR (300 MHz, Chloroform-*d*) δ

8.15 (d, *J* = 8.3 Hz, 2H), 7.78 (d, *J* = 7.6 Hz, 1H), 7.72 (td, *J* = 7.6, 1.2

Hz, 1H), 7.58 – 7.47 (m, 4H), 6.45 (d, *J* = 8.6 Hz, 1H), 6.31 (d, *J* = 2.8

Hz, 1H), 6.11 (dd, *J* = 8.6, 2.8 Hz, 1H), 5.13 – 4.99 (m, 1H), 3.75 (s, 3H), 3.39 (d, *J* = 9.4 Hz,

1H), 3.31 (s, 3H), 3.20 – 3.08 (m, 1H), 2.74 – 2.61 (m, 1H), 2.41 – 2.24 (m, 2H), 2.17 – 2.06

(m, 1H), 1.90 – 1.76 (m, 1H); <sup>13</sup>C NMR (75 MHz, CDCl<sub>3</sub>) δ 166.7, 154.8, 148.6, 142.5, 141.2,

137.6, δ 134.9 (q, *J* = 33.0 Hz), 134.5, 129.2, 128.9, 128.0, δ 125.6 (q, *J* = 3.5 Hz), 124.8,

122.7, 110.7, 99.9, 98.9, 79.2, 59.9, 56.0, 55.5, 35.1, 31.5, 20.2; <sup>19</sup>F NMR (376 MHz, CD<sub>2</sub>Cl<sub>2</sub>)

δ –63.6; HRMS (ESI) *m/z* 547.1505 (M+H<sup>+</sup>), calc. for C<sub>27</sub>H<sub>26</sub>F<sub>3</sub>N<sub>2</sub>O<sub>5</sub>S<sup>+</sup> 547.1509.

The ee was determined by HPLC analysis: CHIRAL MQ (x 2) (4.6 mm i.d. x 250 mm);

Hexane/2-propanol = 50/50; flow rate: 1.0 mL/min; 25 °C; 254 nm; retention time: 9.8 min

(minor) and 17.2 min (major).

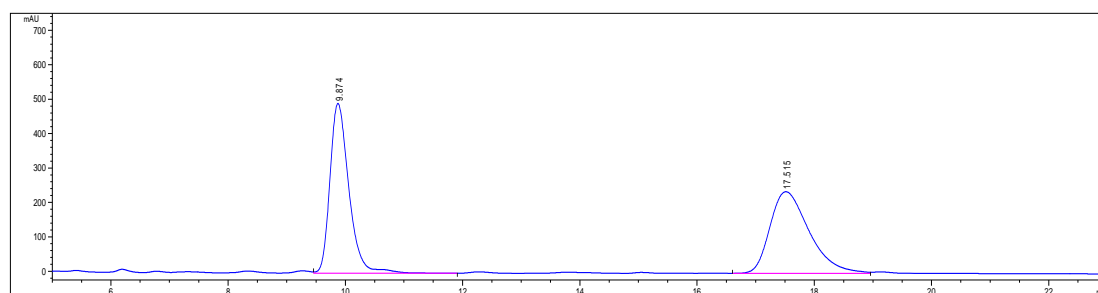

| Entry | Retention Time | Area    | Height | %Area  |
|-------|----------------|---------|--------|--------|
| 1     | 9.874          | 11067.4 | 492.2  | 50.043 |
| 2     | 17.515         | 11048.5 | 237.3  | 49.957 |

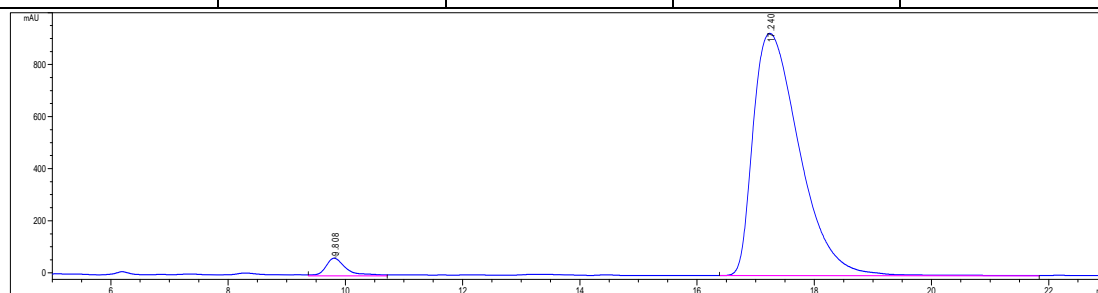

| Entry | Retention Time | Area    | Height | %Area  |
|-------|----------------|---------|--------|--------|
| 1     | 9.808          | 1666.1  | 67.8   | 3.158  |
| 2     | 17.24          | 51092.4 | 931.2  | 96.842 |

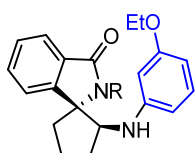

**3h**: white solid; Mp 76.3 – 77.2; 44.0 mg, 83% yield; 90% ee; dr > 19:1;

$[\alpha]_D^{22}$  +23.2 (*c* 1.0, CHCl<sub>3</sub>); <sup>1</sup>H NMR (300 MHz, Chloroform-*d*) δ 8.14 (d, *J* = 8.2 Hz, 2H), 7.87 – 7.78 (m, 1H), 7.73 (t, *J* = 7.5 Hz, 1H), 7.53 (dt, *J* =

R = 4-CF<sub>3</sub>C<sub>6</sub>H<sub>4</sub>SO<sub>2</sub> 10.6, 6.5 Hz, 4H), 6.98 (t, *J* = 8.1 Hz, 1H), 6.26 (dd, *J* = 8.2, 2.2 Hz, 1H), 6.07 – 5.91 (m, 2H), 5.15 (dd, *J* = 11.0, 7.6 Hz, 1H), 3.93 (q, *J* = 7.0 Hz, 2H), 3.24 – 3.06 (m, 1H), 2.74 – 2.65 (m, 1H), 2.40 – 2.21 (m, 2H), 2.18 – 2.06 (m, 1H), 1.92 – 1.72 (m, 1H), 1.35 (t, *J* = 7.0 Hz, 3H); <sup>13</sup>C NMR (75 MHz, CDCl<sub>3</sub>) δ 166.6, 160.2, 148.4, 147.8, 142.4, δ 135.1 (q, *J* = 32.9 Hz), 134.7, 130.0, 129.4, 129.0, 128.2, δ 125.7 (q, *J* = 3.7 Hz), 125.1, δ 123.1 (q, *J* = 273.2 Hz), 122.6, 106.4, 104.0, 100.3, 79.0, 63.2, 59.6, 34.7, 30.8, 19.8, 14.8; <sup>19</sup>F NMR (376 MHz, CDCl<sub>3</sub>) δ –63.3; HRMS (ESI) *m/z* 531.1555 (M+H<sup>+</sup>), calc. for C<sub>27</sub>H<sub>26</sub>F<sub>3</sub>N<sub>2</sub>O<sub>4</sub>S<sup>+</sup> 531.1560.

The ee was determined by HPLC analysis: CHIRALPAK IC (4.6 mm i.d. x 250 mm); Hexane/2-propanol = 70/30; flow rate: 1.0 mL/min; 25 °C; 210 nm; retention time: 12.2 min (minor) and 14.7 min (major).

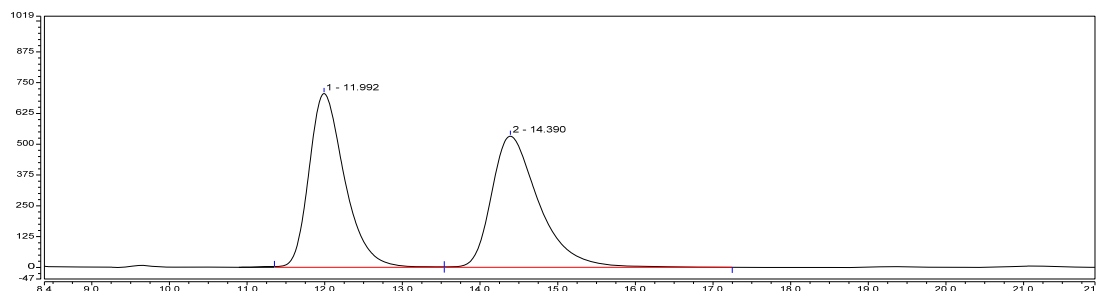

| Entry | Retention Time | Area     | Height | %Area |
|-------|----------------|----------|--------|-------|
| 1     | 11.992         | 374.3872 | 704.87 | 49.93 |
| 2     | 14.390         | 375.4092 | 531.92 | 50.07 |

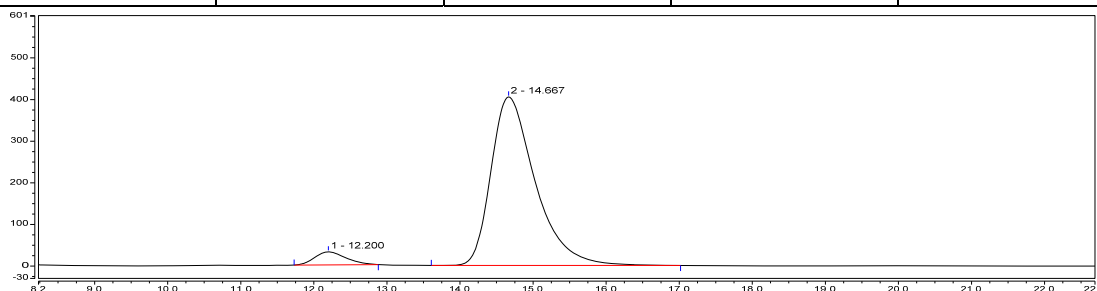

| Entry | Retention Time | Area     | Height | %Area |
|-------|----------------|----------|--------|-------|
| 1     | 12.200         | 15.3530  | 31.20  | 5.13  |
| 2     | 14.667         | 283.8473 | 404.57 | 94.87 |



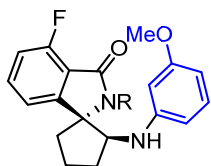

**3i**: white solid; Mp 94.7 - 95.7 °C; 47.0 mg, 88% yield; 95% ee; dr > 19:1;

$[\alpha]_D^{22} +43.5$  (c 1.0, CHCl<sub>3</sub>); <sup>1</sup>H NMR (300 MHz, CDCl<sub>3</sub>) δ 8.16 (d, *J* = 8.3 Hz, 2H), 7.71 (td, *J* = 8.0, 4.9 Hz, 1H), 7.54 (d, *J* = 8.3 Hz, 2H), 7.31 (d, *J*

*R* = 4-CF<sub>3</sub>C<sub>6</sub>H<sub>4</sub>SO<sub>2</sub> = 7.8 Hz, 1H), 7.15 (t, *J* = 8.6 Hz, 1H), 7.00 (t, *J* = 8.1 Hz, 1H), 6.29 (d, *J* = 8.1 Hz, 1H), 6.08 – 5.94 (m, 2H), 5.17 (dd, *J* = 10.9, 7.7 Hz, 1H), 3.71 (s, 3H), 3.16 – 3.05 (m, 1H), 2.68 (dt, *J* = 12.9, 6.4 Hz, 1H), 2.29 (dt, *J* = 15.1, 10.6 Hz, 2H), 2.09 (d, *J* = 11.4 Hz, 1H), 1.81 (dd, *J* = 21.4, 11.1 Hz, 1H); <sup>13</sup>C NMR (75 MHz, CDCl<sub>3</sub>) δ 163.4 (d, *J* = 2.6 Hz), 160.9, 159.5 (d, *J* = 265.8 Hz), 151.1, 142.2, 136.7 (d, *J* = 8.2 Hz), 135.3 (q, *J* = 33.1 Hz), 130.2, 129.3, 125.8 (q, *J* = 3.7 Hz), 123.1 (q, *J* = 273.2 Hz), 118.6 (d, *J* = 4.4 Hz), 116.6 (d, *J* = 18.7 Hz), 116.1 (d, *J* = 12.5 Hz), 106.8, 104.0, 100.0, 78.8, 60.4, 55.2, 35.4, 31.3, 20.1; <sup>19</sup>F NMR (376 MHz, CD<sub>2</sub>Cl<sub>2</sub>) δ –63.6, –115.8; HRMS (ESI) *m/z* 557.1127 (M+Na<sup>+</sup>), calc. for C<sub>26</sub>H<sub>22</sub>F<sub>4</sub>N<sub>2</sub>O<sub>4</sub>SNa<sup>+</sup> 557.1129.

The ee was determined by HPLC analysis: CHIRALPAK IA (4.6 mm i.d. x 250 mm); Hexane/2-propanol = 80/20; flow rate: 1.0 mL/min; 25 °C; 254 nm; retention time: 15.8 min (minor) and 25.5 min (major).

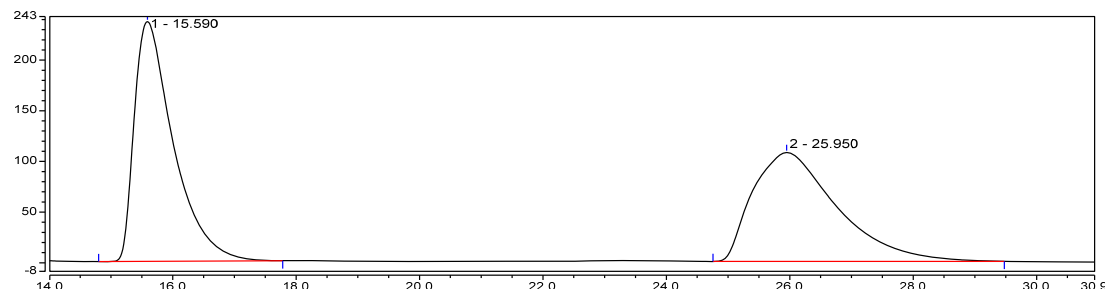

| Entry | Retention Time | Area     | Height | %Area |
|-------|----------------|----------|--------|-------|
| 1     | 15.590         | 173.7018 | 236.63 | 50.58 |
| 2     | 25.950         | 169.6993 | 107.49 | 49.42 |

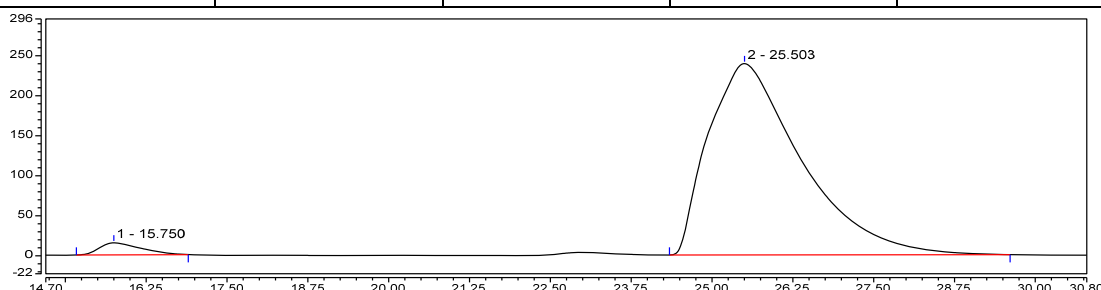

| Entry | Retention Time | Area     | Height | %Area |
|-------|----------------|----------|--------|-------|
| 1     | 15.750         | 11.2075  | 15.10  | 2.75  |
| 2     | 25.503         | 397.0699 | 238.95 | 97.25 |

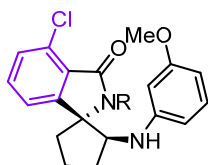

**3j**: white solid; Mp 131.5 - 132.7 °C; 53.4 mg, 97% yield; 93% ee; dr > 19:1;  $[\alpha]_D^{22} +37.7$  (c 1.0, CHCl<sub>3</sub>); <sup>1</sup>H NMR (300 MHz, CDCl<sub>3</sub>) δ 8.17 (d, *J* = 8.2 Hz, 2H), 7.67 7.51 (m, 3H), 7.44 (t, *J* = 8.3 Hz, 2H), 6.99 (t, *J* = 8.1 Hz, 1H), 6.28 (d, *J* = 8.3 Hz, 1H), 6.05 (d, *J* = 8.1 Hz, 1H), 5.99 (s, 1H), 5.24 – 5.12 (m, 1H), 3.71 (s, 3H), 3.18 – 3.04 (m, 1H), 2.74 – 2.64 (m, 1H), 2.40 – 2.21 (m, 2H), 2.14 – 2.03 (m, 1H), 1.87 – 1.73 (m, 1H); <sup>13</sup>C NMR (75 MHz, CDCl<sub>3</sub>) δ 164.1, 160.8, 151.1, 147.6, 142.2, 135.2 (q, *J* = 33.5 Hz), 135.0, 133.3, 131.0, 130.1, 129.2, 125.8 (q, *J* = 3.6 Hz), 124.4, 123.0 (q, *J* = 273.2 Hz), 121.0, 106.7, 104.0, 100.0, 77.6, 60.4, 55.1, 35.5, 31.5, 20.2; <sup>19</sup>F NMR (376 MHz, CD<sub>2</sub>Cl<sub>2</sub>) δ –63.6; HRMS (ESI) *m/z* 573.0832 (M+Na<sup>+</sup>), calc. for C<sub>26</sub>H<sub>22</sub>ClF<sub>3</sub>N<sub>2</sub>O<sub>4</sub>SNa<sup>+</sup> 573.0833.

The ee was determined by HPLC analysis: CHIRALPAK IA (4.6 mm i.d. x 250 mm); Hexane/2-propanol = 80/20; flow rate: 1.0 mL/min; 25 °C; 254 nm; retention time: 16.7 min (minor) and 26.9 min (major).

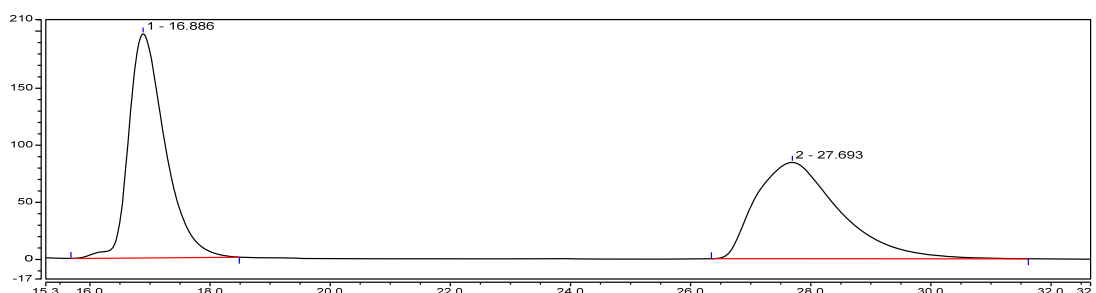

| Entry | Retention Time | Area     | Height | %Area |
|-------|----------------|----------|--------|-------|
| 1     | 16.886         | 137.6585 | 196.19 | 50.28 |
| 2     | 27.693         | 136.1017 | 84.44  | 49.72 |

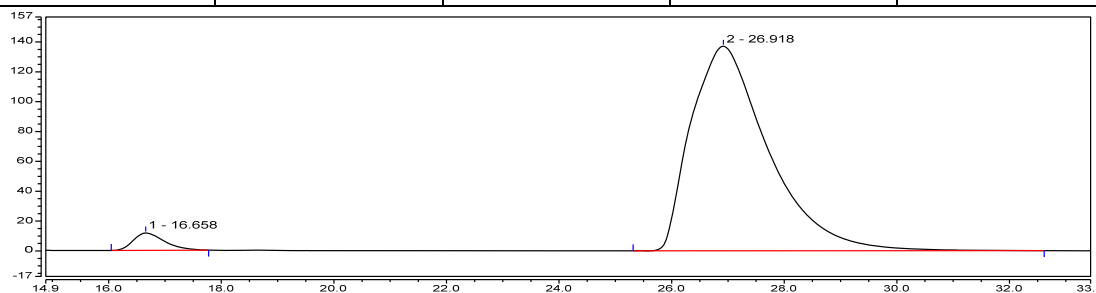

| Entry | Retention Time | Area     | Height | %Area |
|-------|----------------|----------|--------|-------|
| 1     | 16.658         | 7.4436   | 11.63  | 3.31  |
| 2     | 26.918         | 217.5616 | 136.99 | 96.69 |

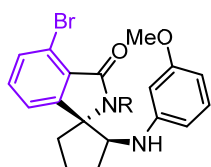

**3k**: white solid; Mp 78.1 - 79.7 °C; 54.0 mg, 91% yield; 95% ee; dr > 19:1;  $[\alpha]_D^{22}$  +19.3 (*c* 1.0, CHCl<sub>3</sub>); <sup>1</sup>H NMR (300 MHz, CDCl<sub>3</sub>) δ 8.17 (d, *J* = 8.3 Hz, 2H), 7.66 (d, *J* = 7.6 Hz, 1H), 7.59 – 7.45 (m, 4H), 7.00 (t, *J* = 8.1 Hz, 1H), 6.29 (dd, *J* = 8.2, 2.1 Hz, 1H), 6.09 – 5.96 (m, 2H), 5.18 (dd, *J* = 11.0, 7.6 Hz, 1H), 3.71 (s, 3H), 3.16 – 3.03 (m, 1H), 2.69 (dt, *J* = 13.2, 6.6 Hz, 1H), 2.39 – 2.20 (m, 2H), 2.16 – 2.02 (m, 1H), 1.85 – 1.70 (m, 1H); <sup>13</sup>C NMR (75 MHz, CDCl<sub>3</sub>) δ 160.8, 151.3, 142.2, 135.2 (q, *J* = 33.1 Hz), 135.0, 134.4, 130.1, 129.2, 125.9 (q, *J* = 3.6 Hz), 123.1 (q, *J* = 273.3 Hz), 121.6, 120.8, 106.8, 104.0, 100.1 (q, *J* = 12.6 Hz), 77.3, 60.5, 55.1, 35.5, 31.4, 20.2; <sup>19</sup>F NMR (376 MHz, CD<sub>2</sub>Cl<sub>2</sub>) δ –63.6; HRMS (ESI) *m/z* 617.0325 (M+Na<sup>+</sup>), calc. for C<sub>26</sub>H<sub>22</sub>BrF<sub>3</sub>N<sub>2</sub>O<sub>4</sub>SNa<sup>+</sup> 617.0328.

The ee was determined by HPLC analysis: CHIRALPAK IA (4.6 mm i.d. x 250 mm); Hexane/2-propanol = 80/20; flow rate: 1.0 mL/min; 25 °C; 254 nm; retention time: 19.9 min (minor) and 29.1 min (major).

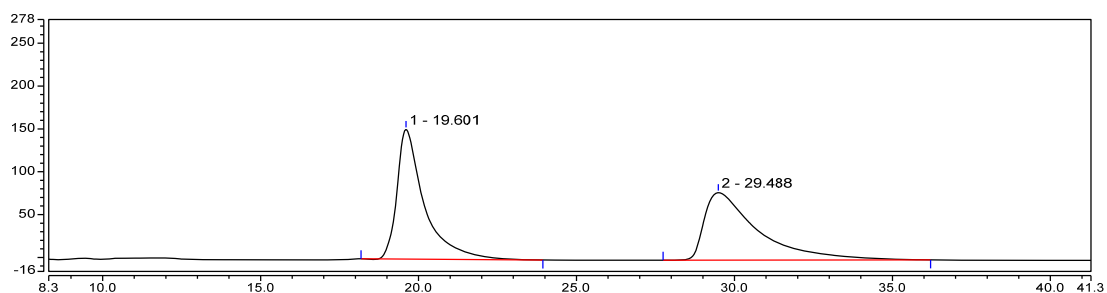

| Entry | Retention Time | Area     | Height | %Area |
|-------|----------------|----------|--------|-------|
| 1     | 19.601         | 151.6313 | 151.25 | 49.48 |
| 2     | 29.488         | 154.8043 | 78.81  | 50.52 |

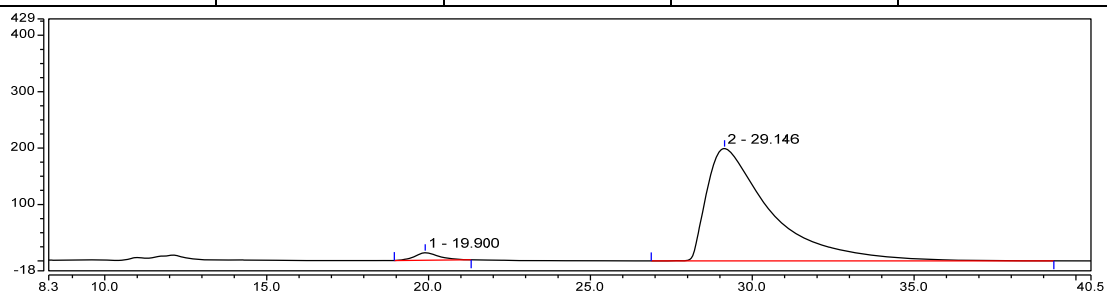

| Entry | Retention Time | Area     | Height | %Area |
|-------|----------------|----------|--------|-------|
| 1     | 19.900         | 11.6405  | 13.31  | 2.50  |
| 2     | 29.146         | 453.6229 | 198.79 | 97.50 |

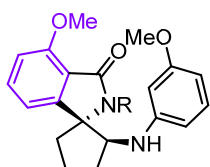

**31**: white solid; Mp 129.5 - 130.7 °C; 48.0 mg, 88% yield; 94% ee; dr > 19:1;  $[\alpha]_D^{22} +25.0$  (*c* 1.0, CHCl<sub>3</sub>); <sup>1</sup>H NMR (300 MHz, CDCl<sub>3</sub>) δ 8.12 (d, *J* = 8.3 Hz, 2H), 7.65 (t, *J* = 8.0 Hz, 1H), 7.48 (d, *J* = 8.3 Hz, 2H), 7.10-6.90 (m, 3H), 6.27 (dd, *J* = 8.2, 1.7 Hz, 1H), 6.04 (d, *J* = 8.0 Hz, 1H), 5.98 (s, 1H), 5.14 (dd, *J* = 10.9, 7.7 Hz, 1H), 3.92 (s, 3H), 3.71 (s, 3H), 3.20 – 3.05 (m, 1H), 2.70 – 2.59 (m, 6.3 Hz, 1H), 2.36 – 2.19 (m, 2H), 2.12 – 2.01 (m, 1H), 1.86 – 1.72 (m, 1H); <sup>13</sup>C NMR (75 MHz, CDCl<sub>3</sub>) δ 165.1, 160.9, 158.6, 151.3, 148.0, 142.6, 136.4, 134.8 (q, *J* = 32.8 Hz), 130.1, 129.2, 125.7 (q, *J* = 3.7 Hz), 123.1 (q, *J* = 272.9 Hz), 115.5, 114.2, 111.2, 106.5, 103.5, 99.8, 77.8, 60.0, 56.1, 55.1, 35.2, 31.0, 19.9; <sup>19</sup>F NMR (376 MHz, CDCl<sub>3</sub>) δ -63.4; HRMS (ESI) *m/z* 569.1328 (M+Na<sup>+</sup>), calc. for C<sub>27</sub>H<sub>25</sub>F<sub>3</sub>N<sub>2</sub>O<sub>5</sub>SNa<sup>+</sup> 569.1328.

The ee was determined by HPLC analysis: CHIRALPAK IF (4.6 mm i.d. x 250 mm); Hexane/2-propanol = 60/40; flow rate: 1.0 mL/min; 25 °C; 254 nm; retention time: 7.3 min (minor) and 16.7 min (major).

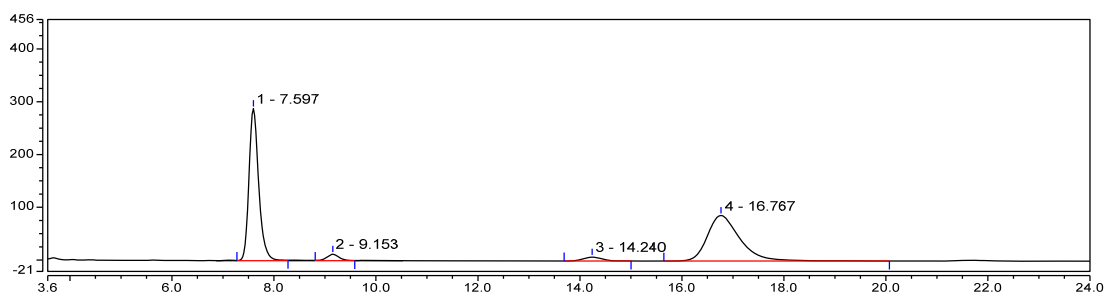

| Entry | Retention Time | Area    | Height | %Area |
|-------|----------------|---------|--------|-------|
| 1     | 7.597          | 64.0107 | 287.97 | 47.58 |
| 2     | 9.153          | 3.4743  | 12.28  | 2.58  |
| 3     | 14.240         | 3.1777  | 7.46   | 2.36  |
| 4     | 16.767         | 63.8573 | 86.27  | 47.47 |

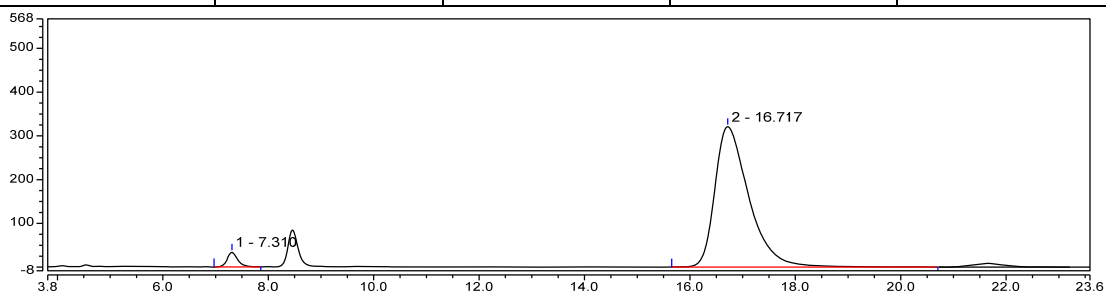

| Entry | Retention Time | Area     | Height | %Area |
|-------|----------------|----------|--------|-------|
| 1     | 7.310          | 7.7192   | 33.16  | 3.11  |
| 2     | 16.717         | 240.1969 | 320.95 | 96.89 |

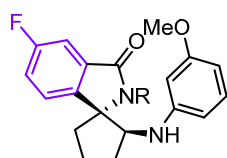

**3m**: white solid; Mp 58.1 - 59.3 °C; 49.7 mg, 93% yield; 93% ee; dr > 19:1;  $[\alpha]_D^{22} +66.6$  (*c* 1.0, CHCl<sub>3</sub>); <sup>1</sup>H NMR (300 MHz, CDCl<sub>3</sub>) δ 8.15 (d, *J* = 8.3 Hz, 2H), 7.59 – 7.47 (m, 3H), 7.47 – 7.37 (m, 2H), 6.99 (t, *J* = 8.1 Hz, 1H), 6.28 (dd, *J* = 8.2, 1.7 Hz, 1H), 6.02 (d, *J* = 8.1 Hz, 1H), 5.96 (s, 1H), 5.14 (dd, *J* = 10.8, 7.7 Hz, 1H), 3.71 (s, 3H), 3.21 – 3.05 (m, 1H), 2.76 – 2.65 (m, 1H), 2.37 – 2.18 (m, 2H), 2.15 – 2.04 (m, 1H), 1.83 – 1.69 (m, 1H); <sup>13</sup>C NMR (75 MHz, CDCl<sub>3</sub>) δ 165.6 (d, *J* = 3.6 Hz), 163.0 (d, *J* = 251.4 Hz), 147.6, 144.0 (d, *J* = 2.6 Hz), 142.2, 135.3 (q, *J* = 33.4 Hz), 130.4 (d, *J* = 8.7 Hz), 130.2, 129.1, 125.8 (q, *J* = 3.5 Hz), 124.5 (d, *J* = 8.2 Hz), 123.0 (q, *J* = 273.2 Hz), 122.4 (d, *J* = 23.6 Hz), 111.6 (d, *J* = 23.5 Hz), 106.6, 103.8, 99.8, 79.1, 59.8, 55.1, 34.8, 31.1, 19.9; <sup>19</sup>F NMR (376 MHz, CD<sub>2</sub>Cl<sub>2</sub>) δ –63.6, –111.6; HRMS (ESI) *m/z* 557.1127 (M+Na<sup>+</sup>), calc. for C<sub>26</sub>H<sub>22</sub>F<sub>4</sub>N<sub>2</sub>O<sub>4</sub>SNa<sup>+</sup> 557.1129.

The ee was determined by HPLC analysis: CHIRALPAK IA (4.6 mm i.d. x 250 mm); Hexane/2-propanol = 80/20; flow rate: 1.0 mL/min; 25 °C; 254 nm; retention time: 11.7 min (minor) and 24.6 min (major).

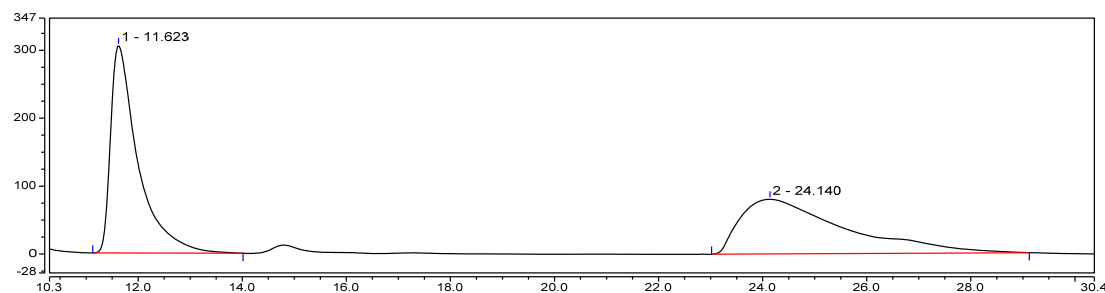

| Entry | Retention Time | Area     | Height | %Area |
|-------|----------------|----------|--------|-------|
| 1     | 11.623         | 185.4204 | 304.99 | 49.90 |
| 2     | 24.140         | 186.1569 | 80.59  | 50.10 |

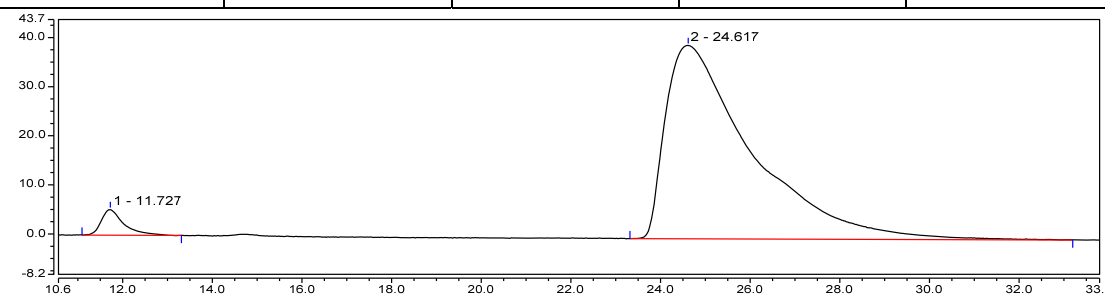

| Entry | Retention Time | Area    | Height | %Area |
|-------|----------------|---------|--------|-------|
| 1     | 11.727         | 3.0399  | 5.22   | 3.36  |
| 2     | 24.617         | 87.5161 | 39.38  | 96.64 |

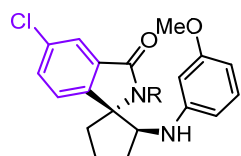

**3n**: white solid; Mp 131.5 - 132.7 °C; 46.2 mg, 84% yield; 92% ee; dr > 19:1;  $[\alpha]_D^{22} +88.1$  (c 1.0, CHCl<sub>3</sub>); <sup>1</sup>H NMR (300 MHz, CDCl<sub>3</sub>) δ 8.14 (d, *J* = 8.2 Hz, 2H), 7.73 (s, 1H), 7.70 – 7.63 (m, 1H), 7.53 (d, *J* = 8.4 Hz, 2H), 7.46 (d, *J* = 8.2 Hz, 1H), 6.99 (t, *J* = 8.1 Hz, 1H), 6.28 (d, *J* = 8.2 Hz, 1H), 6.03 (d, *J* = 8.0 Hz, 1H), 5.96 (s, 1H), 5.15 (dd, *J* = 10.6, 7.8 Hz, 1H), 3.71 (s, 3H), 3.20 – 3.06 (m, 1H), 2.74 – 2.65 (m, 1H), 2.28 – 2.18 (m, 2H), 2.16 – 2.04 (m, 1H), 1.83 – 1.69 (m, 1H); <sup>13</sup>C NMR (75 MHz, CDCl<sub>3</sub>) δ 165.3, 160.8, 147.6, 146.5, 142.1, 135.8, 135.3 (q, *J* = 33.3 Hz), 134.7, 130.1, 129.9, 129.1, 125.8 (q, *J* = 3.6 Hz), 125.0, 124.0, 123.0 (q, *J* = 273.2 Hz), 106.6, 103.8, 99.8, 79.1, 59.9, 55.1, 34.8, 31.1, 19.9; <sup>19</sup>F NMR (376 MHz, CD<sub>2</sub>Cl<sub>2</sub>) δ –63.6; HRMS (ESI) *m/z* 573.0832 (M+Na<sup>+</sup>), calc. for C<sub>26</sub>H<sub>22</sub>ClF<sub>3</sub>N<sub>2</sub>O<sub>4</sub>SNa<sup>+</sup> 573.0833.

The ee was determined by HPLC analysis: CHIRALPAK IA (4.6 mm i.d. x 250 mm); Hexane/2-propanol = 80/20; flow rate: 1.0 mL/min; 25 °C; 254 nm; retention time: 11.8 min (minor) and 26.8 min (major).

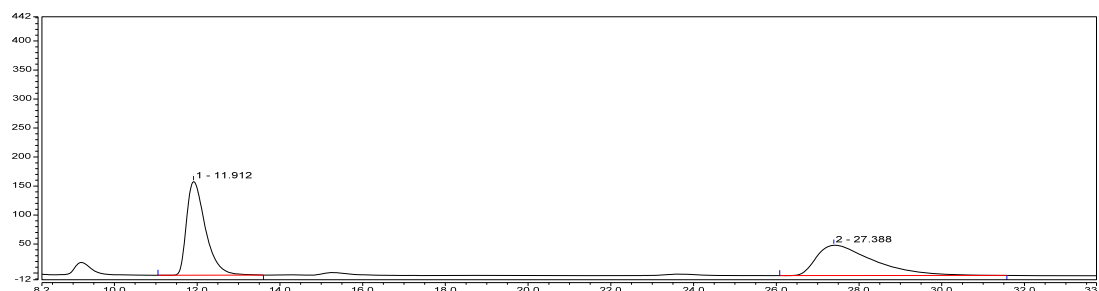

| Entry | Retention Time | Area    | Height | %Area |
|-------|----------------|---------|--------|-------|
| 1     | 11.912         | 85.2078 | 161.44 | 50.47 |
| 2     | 27.388         | 83.6139 | 52.49  | 49.53 |

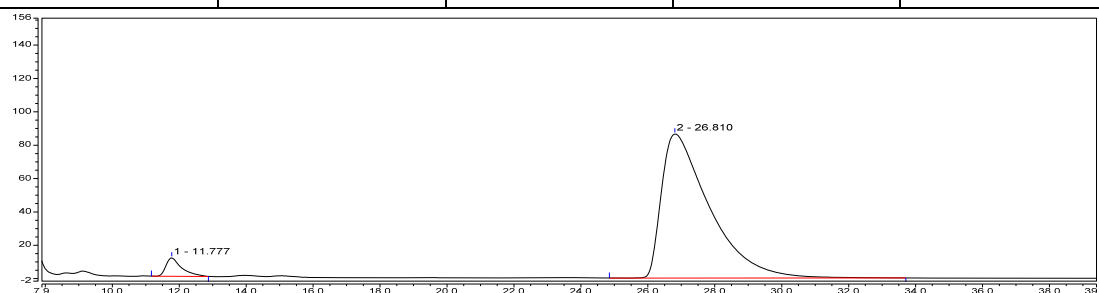

| Entry | Retention Time | Area     | Height | %Area |
|-------|----------------|----------|--------|-------|
| 1     | 11.777         | 5.9420   | 11.09  | 3.98  |
| 2     | 26.810         | 143.4316 | 86.43  | 96.02 |

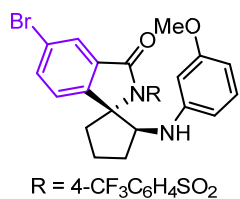

**30**: white solid; Mp 147.5 - 148.7 °C; 55.8 mg, 94% yield; 93% ee; dr > 19:1; [ $\alpha$ ]<sub>D</sub><sup>22</sup> +93.9 (*c* 1.0, CHCl<sub>3</sub>); <sup>1</sup>H NMR (300 MHz, CDCl<sub>3</sub>)  $\delta$  8.15 (d, *J* = 8.2 Hz, 2H), 7.90 (s, 1H), 7.82 (d, *J* = 8.2 Hz, 1H), 7.53 (d, *J* = 8.3 Hz, 2H), 7.40 (d, *J* = 8.3 Hz, 1H), 6.99 (t, *J* = 8.1 Hz, 1H), 6.29 (d, *J* = 8.0 Hz, 1H), 6.03 (d, *J* = 8.3 Hz, 1H), 5.97 (s, 1H), 5.15 (dd, *J* = 10.5, 7.9 Hz, 1H), 3.71 (s, 3H), 3.17 – 3.04 (m, 1H), 2.73 – 2.63 (m, 1H), 2.40 – 2.19 (m, 2H), 2.16 – 2.02 (m, 1H), 1.82 – 1.70 (m, 1H); <sup>13</sup>C NMR (75 MHz, CDCl<sub>3</sub>)  $\delta$  165.2, 160.9, 147.6, 147.1, 142.2, 137.5, 135.3 (q, *J* = 33.2 Hz), 130.2, 130.1, 129.1, 128.1, 125.8 (q, *J* = 3.7 Hz), 124.2, 123.5, 123.0 (q, *J* = 273.3 Hz), 106.6, 103.9, 99.9, 79.2, 60.0, 55.1, 34.9, 31.2, 20.0; <sup>19</sup>F NMR (376 MHz, CD<sub>2</sub>Cl<sub>2</sub>)  $\delta$  -63.6; HRMS (ESI) *m/z* 617.0327 (M+Na<sup>+</sup>), calc. for C<sub>26</sub>H<sub>22</sub>BrF<sub>3</sub>N<sub>2</sub>O<sub>4</sub>SNa<sup>+</sup> 617.0328.

The ee was determined by HPLC analysis: CHIRALPAK IF (4.6 mm i.d. x 250 mm); Hexane/2-propanol = 60/40; flow rate: 1.0 mL/min; 25 °C; 254 nm; Retention Time: 9.7 min (minor) and 19.3 min (major).

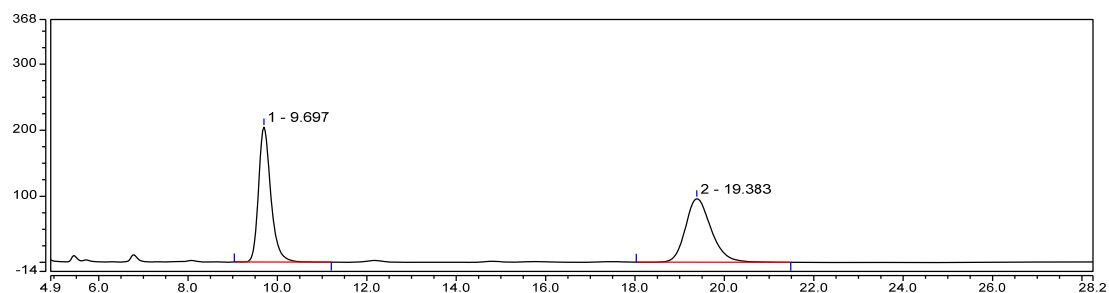

| Entry | Retention Time | Area    | Height | %Area |
|-------|----------------|---------|--------|-------|
| 1     | 9.697          | 65.2896 | 204.26 | 50.44 |
| 2     | 19.383         | 64.1469 | 96.14  | 49.56 |

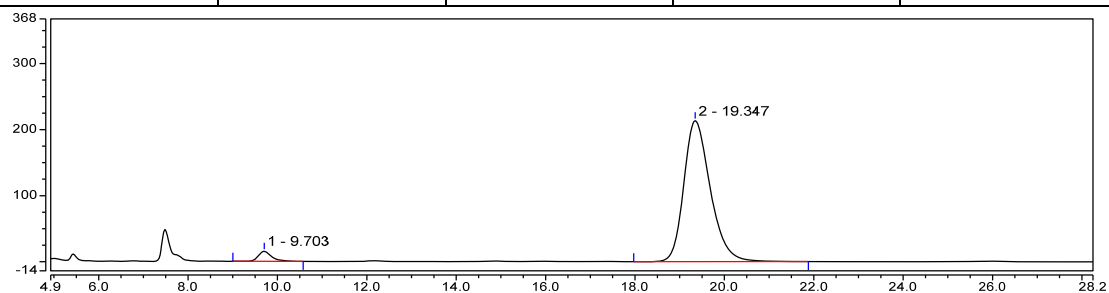

| Entry | Retention Time | Area     | Height | %Area |
|-------|----------------|----------|--------|-------|
| 1     | 9.703          | 5.3039   | 15.13  | 3.50  |
| 2     | 19.347         | 146.3268 | 213.37 | 96.50 |

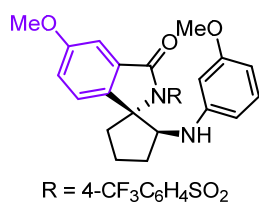

**3p**: white solid; Mp 80.6 - 81.8 °C; 43.1 mg, 79% yield; 93% ee; dr > 19:1;  $[\alpha]_D^{22} +116.3$  (*c* 1.0, CHCl<sub>3</sub>); <sup>1</sup>H NMR (300 MHz, CDCl<sub>3</sub>) δ 8.17 (d, *J* = 7.9 Hz, 2H), 7.53 (d, *J* = 7.8 Hz, 2H), 7.44 (d, *J* = 8.3 Hz, 1H), 7.36 – 7.25 (m, 2H), 7.04 (t, *J* = 7.9 Hz, 1H), 6.31 (d, *J* = 8.0 Hz, 1H), 6.06 (d, *J* = 7.9 Hz, 1H), 5.99 (s, 1H), 5.15 (t, *J* = 9.0 Hz, 1H), 3.88 (s, 3H), 3.75 (s, 3H), 3.27 – 3.11 (m, 1H), 2.76 – 2.66 (m, 1H), 2.42 – 2.21 (m, 2H), 2.19 – 2.08 (m, 1H), 1.86 – 1.70 (m, 1H); <sup>13</sup>C NMR (75 MHz, CDCl<sub>3</sub>) δ 166.7, 160.8, 160.6, 147.8, 142.4, 140.5, 135.0 (q, *J* = 33.1 Hz), 130.1, 129.5, 129.0, 125.7 (q, *J* = 3.6 Hz), 123.6, 123.4, 123.0 (q, *J* = 273.4 Hz), 106.9, 106.4, 103.4, 99.6, 78.8, 59.3, 55.7, 55.0, 34.5, 30.7, 19.6; <sup>19</sup>F NMR (376 MHz, CDCl<sub>3</sub>) δ –63.3; HRMS (ESI) *m/z* 569.1329 (M+Na<sup>+</sup>), calc. for C<sub>27</sub>H<sub>25</sub>F<sub>3</sub>N<sub>2</sub>O<sub>5</sub>SNa<sup>+</sup> 569.1328.

The ee was determined by HPLC analysis: CHIRALPAK IA (4.6 mm i.d. x 250 mm); Hexane/2-propanol = 80/20; flow rate: 1.0 mL/min; 25 °C; 254 nm; retention time: 16.6 min (minor) and 26.2 min (major).

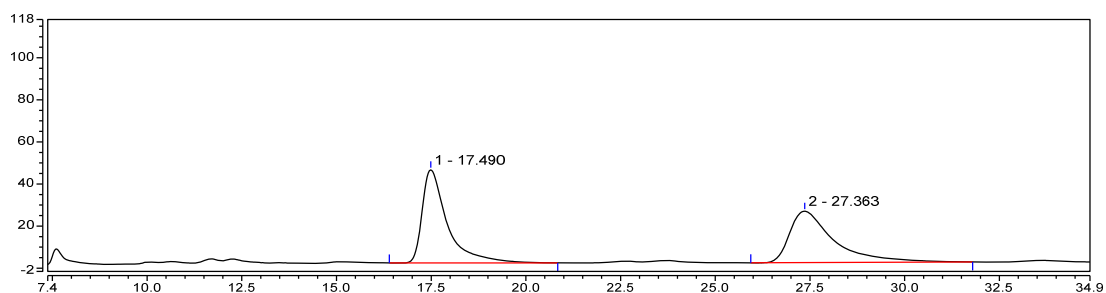

| Entry | Retention Time | Area    | Height | %Area |
|-------|----------------|---------|--------|-------|
| 1     | 17.490         | 34.0310 | 44.24  | 50.65 |
| 2     | 27.363         | 33.1595 | 24.43  | 49.35 |

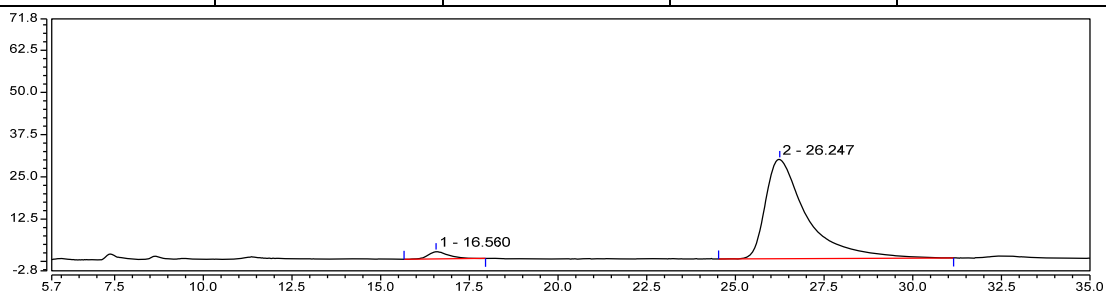

| Entry | Retention Time | Area    | Height | %Area |
|-------|----------------|---------|--------|-------|
| 1     | 16.560         | 1.4178  | 2.14   | 3.44  |
| 2     | 26.247         | 39.7706 | 29.39  | 96.56 |



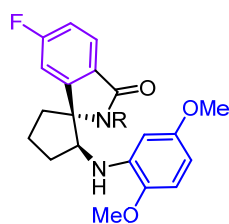

**3q**: white solid; Mp 71.6-72.9 °C; 52.4 mg, 93% yield; 95% ee; dr > 19:1;  $[\alpha]_D^{22} +28.1$  (*c* 1.0, CHCl<sub>3</sub>); <sup>1</sup>H NMR (300 MHz, Chloroform-*d*) δ 8.16 (d, *J* = 8.2 Hz, 2H), 7.74 (dd, *J* = 8.4, 5.0 Hz, 1H), 7.55 (d, *J* = 8.3 Hz, 2H), 7.20 (td, *J* = 8.6, 6.3 Hz, 2H), 6.47 (d, *J* = 8.7 Hz, 1H), 6.29 (d, *J* = 2.7 Hz, 1H), 6.14 (dd, *J* = 8.7, 2.8 Hz, 1H), 5.09 (t, *J* = 9.1 Hz, 1H), 3.73 (s, 3H), 3.40 (s, 3H), 3.11 (t, *J* = 12.3 Hz, 1H), 2.70 (d, *J* = 11.1 Hz, 1H), 2.42 – 2.20 (m, 2H), 2.18 – 2.03 (m, 1H), 1.82 (d, *J* = 10.7 Hz, 1H); <sup>13</sup>C NMR (75 MHz, CDCl<sub>3</sub>) δ 166.5 (d, *J* = 256.4 Hz), 165.5, 154.7, δ 151.0 (d, *J* = 9.4 Hz), δ 141.8 (d, *J* = 83.3 Hz), δ 135.1 (q, *J* = 33.1 Hz), 129.0, δ 127.1 (d, *J* = 10.2 Hz), δ 125.7 (q, *J* = 3.7 Hz), δ 124.1 (d, *J* = 2.2 Hz), δ 123.0 (q, *J* = 273.2 Hz), 117.4, 117.1, 110.6, 110.2, 100.8, 99.4, δ 78.9 (d, *J* = 2.7 Hz), 60.5, 55.9, 55.6, 35.5, 31.7, 20.5; <sup>19</sup>F NMR (376 MHz, CD<sub>2</sub>Cl<sub>2</sub>) δ –63.6, –102.0; HRMS (ESI) *m/z* 565.1411 (M+H<sup>+</sup>), calc. for C<sub>27</sub>H<sub>25</sub>F<sub>4</sub>N<sub>2</sub>O<sub>5</sub>S<sup>+</sup> 565.1415.

The ee was determined by HPLC analysis: CHIRAL MQ (x 2) (4.6 mm i.d. x 250 mm); Hexane/2-propanol = 80/20; flow rate: 1.0 mL/min; 25 °C; 210 nm; retention time: 15.2 min (minor) and 25.3 min (major).

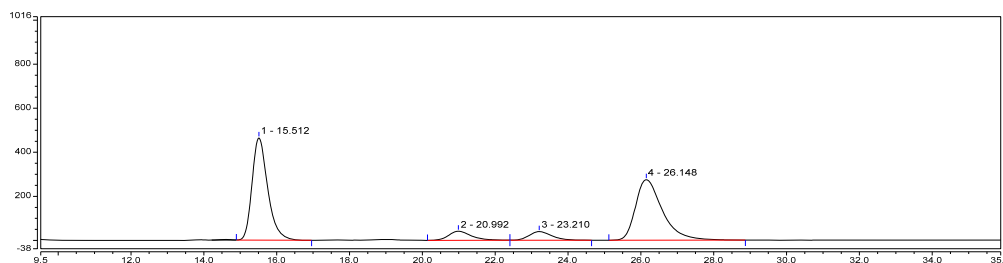

| Entry | Retention Time | Area     | Height | %Area |
|-------|----------------|----------|--------|-------|
| 1     | 15.512         | 232.2256 | 464.48 | 44.22 |
| 2     | 20.992         | 30.2680  | 41.61  | 5.76  |
| 3     | 23.210         | 28.1793  | 39.38  | 5.37  |
| 4     | 26.148         | 234.5174 | 275.13 | 44.65 |

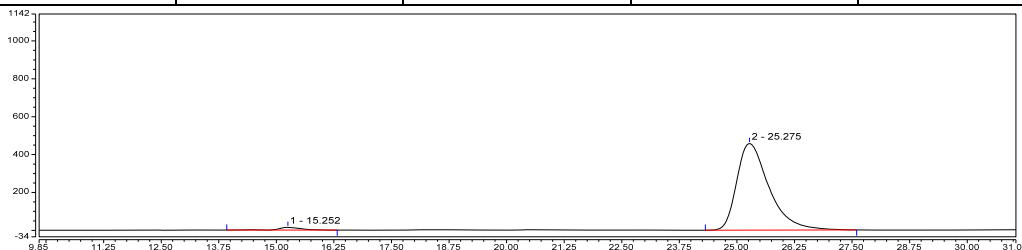

| Entry | Retention Time | Area     | Height | %Area |
|-------|----------------|----------|--------|-------|
| 1     | 15.252         | 8.6932   | 15.02  | 2.29  |
| 2     | 25.275         | 370.9612 | 457.61 | 97.71 |

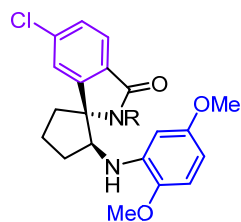

**3r**: white solid; Mp 74.5-75.4 °C; 52.8 mg, 91% yield; 91% ee; dr > 19:1;  $[\alpha]_D^{22} +108.0$  (c 1.0, CHCl<sub>3</sub>); <sup>1</sup>H NMR (300 MHz, Chloroform-*d*) δ 8.17 (d, *J* = 8.2 Hz, 2H), 7.64 (d, *J* = 8.1 Hz, 1H), 7.57 (d, *J* = 8.3 Hz, 2H), 7.54 – 7.49 (m, 1H), 7.45 (dd, *J* = 8.2, 1.6 Hz, 1H), 6.45 (d, *J* = 8.7 Hz, 1H), 6.28 (d, *J* = 2.8 Hz, 1H), 6.12 (dd, *J* = 8.7, 2.8 Hz, 1H), 5.08 (dd, *J* = 10.5, 7.5 Hz, 1H), 3.73 (s, 3H), 3.40 (s, 3H), 3.16 – 3.02 (m, 1H), 2.80 – 2.63 (m, 1H), 2.43 – 2.23 (m, 2H), 2.20 – 2.03 (m, 1H), 1.95 – 1.73 (m, 1H); <sup>13</sup>C NMR (75 MHz, CDCl<sub>3</sub>) δ 165.6, 154.6, 150.0, 142.2, 140.9, δ 135.1 (q, *J* = 33.0 Hz), 129.8, 129.0, 126.4, 125.8, 125.8, 125.7, 125.7, 123.2, δ 123.0 (q, *J* = 273.1 Hz), 110.5, 100.8, 99.3, 79.1, 60.6, 55.9, 55.5, 35.7, 31.9, 20.7; <sup>19</sup>F NMR (376 MHz, CDCl<sub>3</sub>) δ –63.3; HRMS (ESI) *m/z* 581.1114 (M+H<sup>+</sup>), calc. for C<sub>27</sub>H<sub>25</sub>ClF<sub>3</sub>N<sub>2</sub>O<sub>5</sub>S<sup>+</sup> 581.1119.

The ee was determined by HPLC analysis: CHIRAL MQ (x 2) (4.6 mm i.d. x 250 mm); Hexane/2-propanol = 80/20; flow rate: 1.0 mL/min; 25 °C; 210 nm; retention time: 15.3 min (minor) and 26.2 min (major).

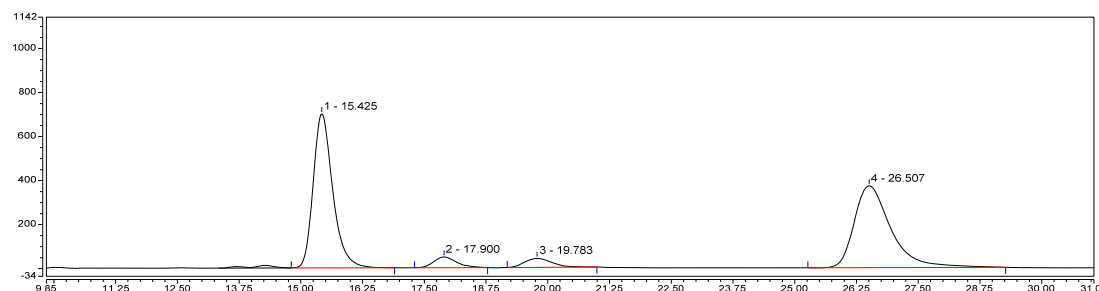

| Entry | Retention Time | Area     | Height | %Area |
|-------|----------------|----------|--------|-------|
| 1     | 15.425         | 320.8035 | 700.38 | 46.32 |
| 2     | 17.900         | 26.3091  | 49.03  | 3.80  |
| 3     | 19.783         | 26.4540  | 41.36  | 3.82  |
| 4     | 26.507         | 319.0217 | 372.28 | 46.06 |

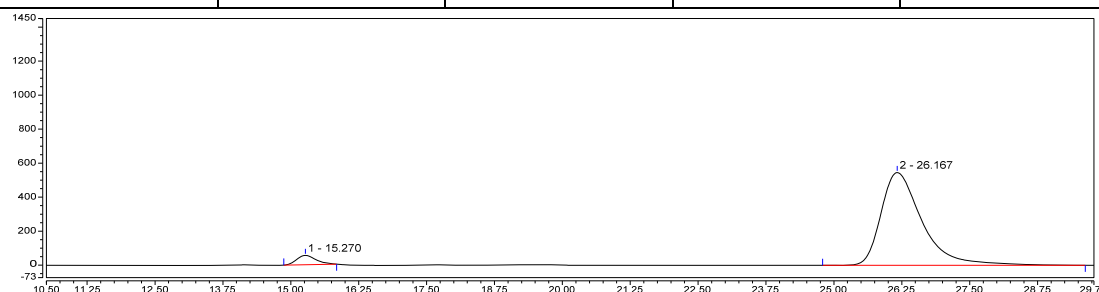

| Entry | Retention Time | Area     | Height   | %Area |
|-------|----------------|----------|----------|-------|
| 1     | 15.270         | 8.6932   | 22.3982  | 4.48  |
| 2     | 26.167         | 370.9612 | 477.4711 | 95.52 |

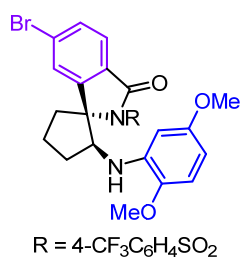

**3s**: white solid; Mp 72.6-73.3 °C; 46.8 mg, 75% yield; 90% ee; dr > 19:1;  $[\alpha]_D^{22} +46.3$  (*c* 1.0, CHCl<sub>3</sub>); <sup>1</sup>H NMR (300 MHz, Chloroform-*d*) δ 8.18 (d, *J* = 8.2 Hz, 2H), 7.68 (d, *J* = 1.4 Hz, 1H), 7.64 – 7.53 (m, 4H), 6.44 (d, *J* = 8.7 Hz, 1H), 6.27 (d, *J* = 2.8 Hz, 1H), 6.12 (dd, *J* = 8.7, 2.8 Hz, 1H), 5.15 – 5.0 (m, 1H), 3.73 (s, 3H), 3.41 (s, 3H), 3.16 – 3.02 (m, 1H), 2.74 – 2.62 (m, 1H), 2.43 – 2.21 (m, 2H), 2.18 – 2.06 (m, 1H), 1.91 – 1.76 (m, 1H); <sup>13</sup>C NMR (75 MHz, CDCl<sub>3</sub>) δ 165.7, 154.6, 150.1, 142.2, 141.1, 136.8, 135.1 (q, *J* = 33.0 Hz), 132.6, 129.4, 129.0, 126.8, 126.1, 125.8, 125.7 (q, *J* = 3.6 Hz), 123.0 (q, *J* = 273.2 Hz), 110.4, 100.6, 99.2, 79.1, 60.6, 55.9, 55.5, 35.8, 32.0, 20.8; <sup>19</sup>F NMR (565 MHz, CDCl<sub>3</sub>) δ –63.3; HRMS (ESI) *m/z* 625.0608 (M+H<sup>+</sup>), calc. for C<sub>27</sub>H<sub>25</sub>BrF<sub>3</sub>N<sub>2</sub>O<sub>5</sub>S<sup>+</sup> 625.0614.

The ee was determined by HPLC analysis: CHIRAL MQ (x 2) (4.6 mm i.d. x 250 mm); Hexane/2-propanol = 80/20; flow rate: 1.0 mL/min; 25 °C; 210 nm; retention time: 15.2 min (minor) and 26.1 min (major).

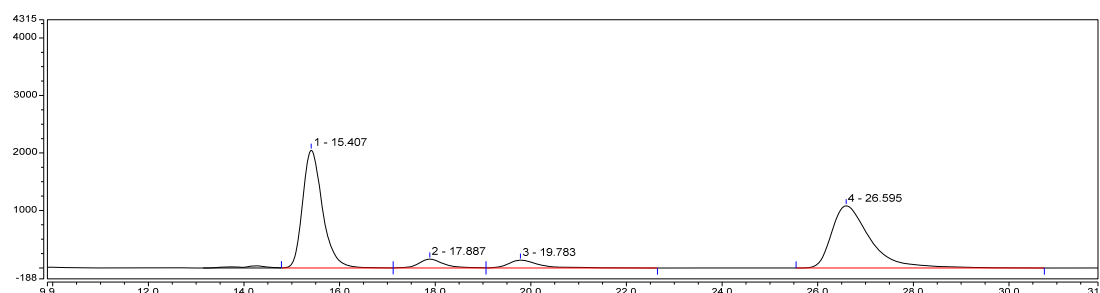

| Entry | Retention Time | Area      | Height  | %Area |
|-------|----------------|-----------|---------|-------|
| 1     | 15.407         | 986.7145  | 2046.76 | 45.08 |
| 2     | 17.887         | 91.7346   | 153.58  | 4.19  |
| 3     | 19.783         | 103.2292  | 136.53  | 4.72  |
| 4     | 26.595         | 1007.3232 | 1081.41 | 46.02 |

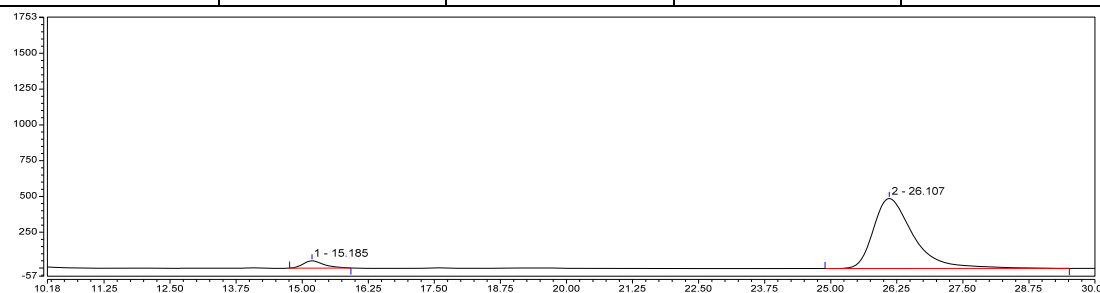

| Entry | Retention Time | Area     | Height | %Area |
|-------|----------------|----------|--------|-------|
| 1     | 15.185         | 22.9570  | 50.35  | 5.08  |
| 2     | 26.107         | 428.8944 | 488.89 | 94.92 |

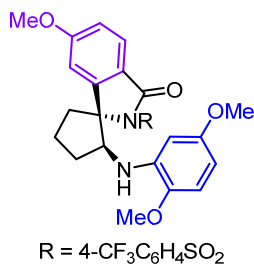

**3t**: white solid; Mp 68.1 - 69.4 °C; 50.1 mg, 87% yield; 91% ee; dr > 19:1;  $[\alpha]_D^{22}$  +101.6 (*c* 1.0, CHCl<sub>3</sub>); <sup>1</sup>H NMR (300 MHz, Methylene Chloride-*d*<sub>2</sub>) δ 8.14 (d, *J* = 8.2 Hz, 2H), 7.62 (d, *J* = 8.4 Hz, 1H), 7.57 (d, *J* = 8.3 Hz, 2H), 7.00 (dd, *J* = 8.5, 2.1 Hz, 1H), 6.96 (d, *J* = 2.1 Hz, 1H), 6.45 (d, *J* = 8.7 Hz, 1H), 6.28 (d, *J* = 2.8 Hz, 1H), 6.08 (dd, *J* = 8.7, 2.8 Hz, 1H), 5.09 – 4.93 (m, 1H), 3.90 (s, 3H), 3.71 (s, 3H), 3.57 (s, 1H), 3.35 (s, 3H), 3.11 – 2.98 (m, 1H), 2.69 – 2.56 (m, 1H), 2.39 – 2.22 (m, 2H), 2.15 – 2.01 (m, 1H), 1.93 – 1.73 (m, 1H); <sup>13</sup>C NMR (75 MHz, CD<sub>2</sub>Cl<sub>2</sub>) δ 165.7, 164.5, 154.4, 150.6, 142.5, 140.7, 137.2, 134.1 (q, *J* = 32.9 Hz), 128.4, 125.7, 125.2 (q, *J* = 3.7 Hz), 122.8 (q, *J* = 273.1 Hz), 119.8, 115.0, 110.2, 107.4, 99.5, 98.4, 78.5, 60.2, 55.5, 55.5, 54.9, 35.0, 31.3, 20.1; <sup>19</sup>F NMR (376 MHz, CD<sub>2</sub>Cl<sub>2</sub>) δ -63.6; HRMS (ESI) *m/z* 577.1609 (M+H<sup>+</sup>), calc. for C<sub>28</sub>H<sub>28</sub>F<sub>3</sub>N<sub>2</sub>O<sub>6</sub>S<sup>+</sup> 577.1615.

The ee was determined by HPLC analysis: Lux Cellulose-1 (4.6 mm i.d. x 250 mm); Hexane/2-propanol = 50/50 flow rate: 1.0 mL/min; 25 °C; 210 nm; retention time: 7.5 min (major) and 9.9 min (minor).

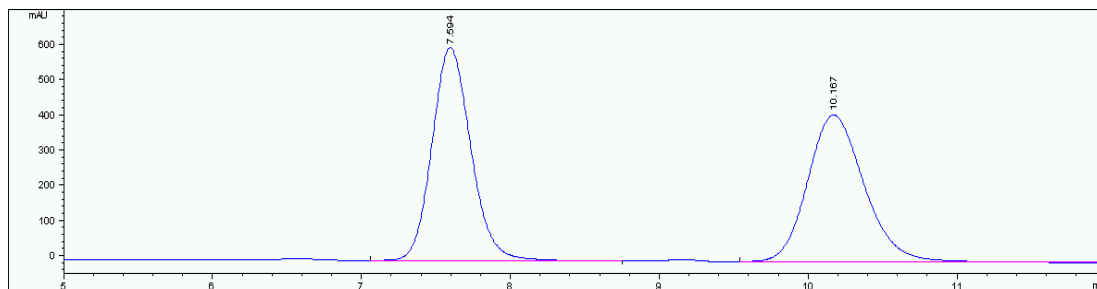

| Entry | Retention Time | Area    | Height | %Area  |
|-------|----------------|---------|--------|--------|
| 1     | 7.594          | 11216.3 | 607.4  | 50.188 |
| 2     | 10.167         | 11132.5 | 418.2  | 49.812 |

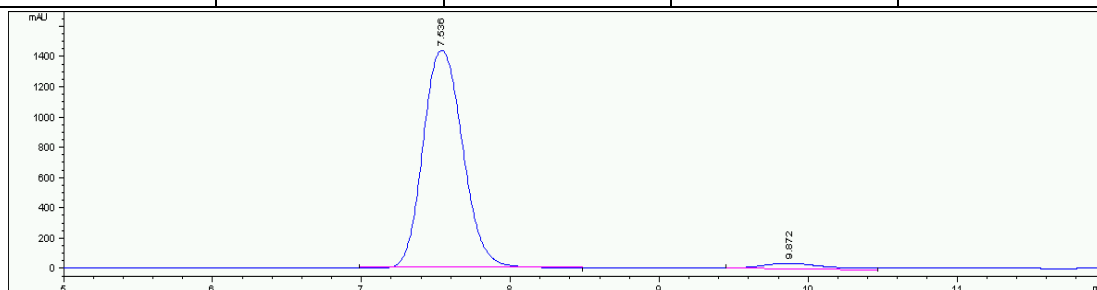

| Entry | Retention Time | Area    | Height | %Area  |
|-------|----------------|---------|--------|--------|
| 1     | 7.536          | 26411.8 | 1434   | 95.370 |
| 2     | 9.872          | 1282.2  | 40.3   | 4.630  |

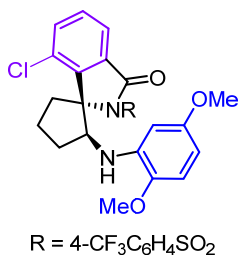

**3u**: white solid; Mp 73.5 - 74.9 °C; 41.8 mg, 82% yield; 97% ee; dr > 19:1; [ $\alpha$ ]<sub>D</sub><sup>22</sup> +20.9 (*c* 1.0, CHCl<sub>3</sub>); <sup>1</sup>H NMR (300 MHz, Chloroform-*d*)  $\delta$  8.17 (d, *J* = 8.2 Hz, 2H), 7.68 – 7.53 (m, 3H), 7.52 – 7.37 (m, 2H), 6.47 (d, *J* = 8.6 Hz, 1H), 6.31 (d, *J* = 2.8 Hz, 1H), 6.13 (dd, *J* = 8.7, 2.8 Hz, 1H), 5.15 – 5.01 (m, 1H), 3.74 (s, 3H), 3.38 (s, 3H), 3.17 – 3.02 (m, 1H), 2.75 – 2.57 (m, 1H), 2.43 – 2.22 (m, 2H), 2.13 – 2.04 (m, 1H), 1.90 – 1.76 (m, 1H); <sup>13</sup>C NMR (75 MHz, CDCl<sub>3</sub>)  $\delta$  164.2, 154.7, 151.3, 142.2, 141.2, 137.4, 135.3, 134.8, 132.9, 130.8, 129.2, 125.8 (q, *J* = 3.5 Hz), 124.1, 123.0 (q, *J* = 273.1 Hz), 121.1, 110.7, 100.4, 99.3, 77.8, 60.9, 55.9, 55.6, 35.7, 32.1, 20.6; <sup>19</sup>F NMR (376 MHz, CD<sub>2</sub>Cl<sub>2</sub>)  $\delta$  -63.6; HRMS (ESI) *m/z* 581.1111 (M+H<sup>+</sup>), calc. for C<sub>28</sub>H<sub>28</sub>F<sub>3</sub>N<sub>2</sub>O<sub>6</sub>S<sup>+</sup> 581.1119.

The ee was determined by HPLC analysis: Lux i-Amylose-1 (4.6 mm i.d. x 250 mm); Hexane/2-propanol = 75/25 flow rate: 1.0 mL/min; 25 °C; 210 nm; retention time: 12.3 min (major) and 14.7 min (minor).

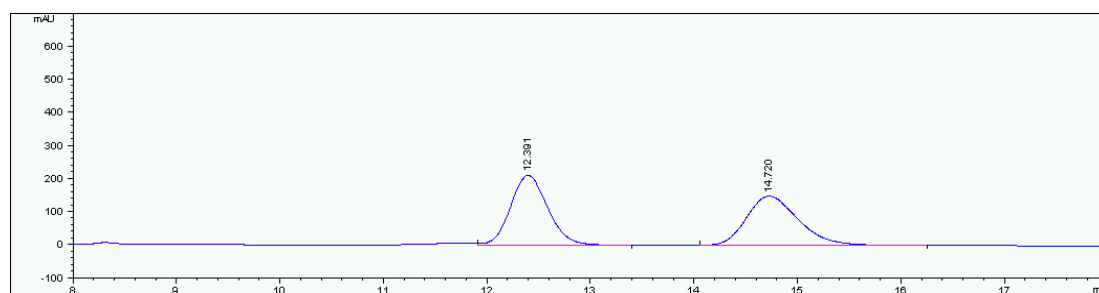

| Entry | Retention Time | Area   | Height | %Area  |
|-------|----------------|--------|--------|--------|
| 1     | 12.391         | 5362.2 | 211.9  | 50.639 |
| 2     | 14.72          | 5226.7 | 149.4  | 49.361 |

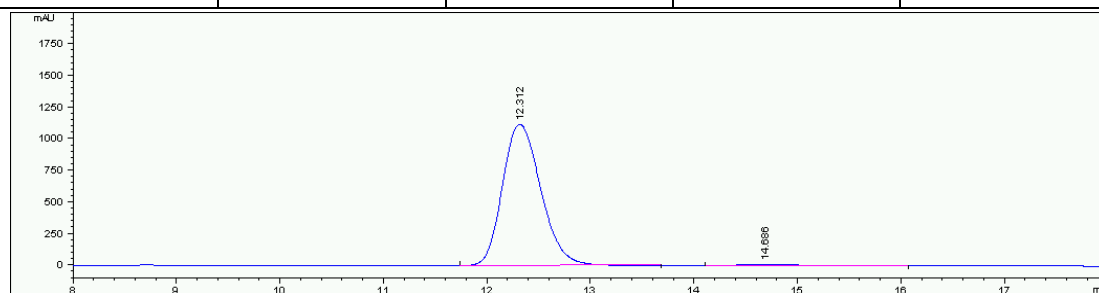

| Entry | Retention Time | Area  | Height | %Area  |
|-------|----------------|-------|--------|--------|
| 1     | 12.312         | 28900 | 1117.4 | 98.416 |
| 2     | 14.686         | 465.2 | 13.5   | 1.584  |

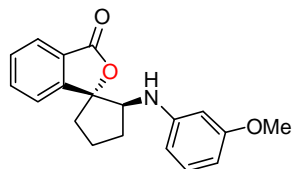

**5**: white solid; Mp 86.5 - 87.4 °C; 20.1 mg, 65% yield, 76% ee;

dr > 19:1;  $[\alpha]_D^{22}$  -35.6 (*c* 1.0, CHCl<sub>3</sub>); <sup>1</sup>H NMR (300 MHz, CDCl<sub>3</sub>)

δ 7.81 (d, *J* = 7.2 Hz, 1H), 7.52 – 7.37 (m, 3H), 6.84 (t, *J* = 8.1 Hz,

1H), 6.21 – 6.04 (m, 1H), 5.83 (d, *J* = 7.9 Hz, 1H), 5.72 (s, 1H), 4.09 (t, *J* = 6.5 Hz, 1H), 3.58

(s, 3H), 2.73 – 2.54 (m, 1H), 2.37 – 2.18 (m, 2H), 2.15 – 1.99 (m, 2H), 1.84 – 1.68 (m, 1H).

<sup>13</sup>C NMR (75 MHz, CDCl<sub>3</sub>) δ 169.9 (s, 1H), 160.5 (s, 2H), 149.9 (s, 2H), 148.2 (s, 2H), 133.9

(s, 4H), 129.7 (s, 4H), 129.2 (s, 3H), 126.6 (s, 1H), 125.4 (s, 4H), 123.5 (s, 4H), 106.1 (s, 4H),

103.7 (s, 4H), 98.8 (s, 4H), 95.9 (s, 2H), 63.3 (s, 4H), 55.0 (s, 4H), 37.5 (s, 4H), 33.8 (s, 4H),

21.6 (s, 3H). HRMS (ESI) *m/z* 332.1255 (M+Na<sup>+</sup>), calc. for C<sub>19</sub>H<sub>19</sub>NO<sub>3</sub>Na<sup>+</sup> 332.1257.

The ee was determined by HPLC analysis: CHIRAL AD-H (4.0 mm i.d. x 100 mm);

Hexane/2-propanol = 90/10; flow rate: 1.0 mL/min; 25 °C; 230 nm; retention time: 20.7 min

(major) and 23.0 min (minor).

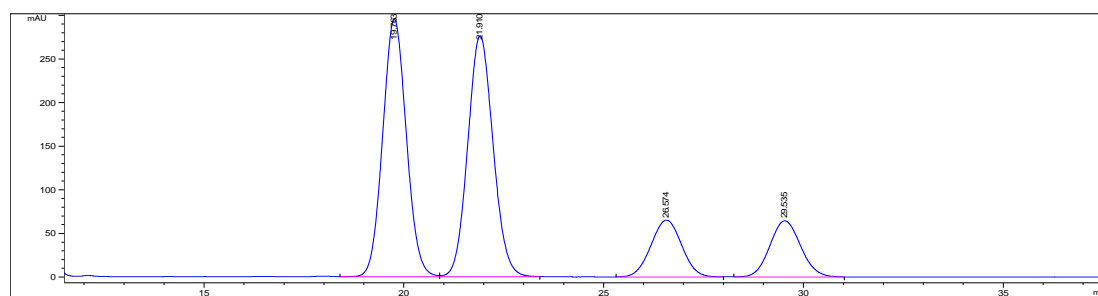

| Entry | Retention Time | Area    | Height | %Area  |
|-------|----------------|---------|--------|--------|
| 1     | 19.763         | 12159.1 | 295.3  | 38.879 |
| 2     | 21.91          | 12183.6 | 276.2  | 38.958 |
| 3     | 26.574         | 3477.4  | 65.1   | 11.119 |
| 4     | 29.535         | 3454    | 64.4   | 11.044 |

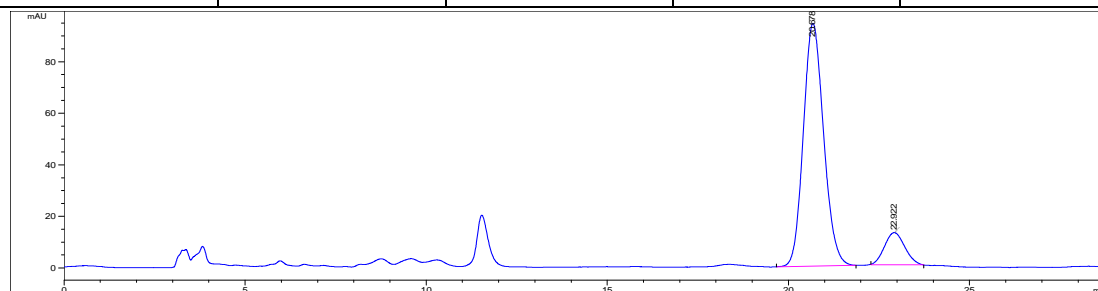

| Entry | Retention Time | Area   | Height | %Area  |
|-------|----------------|--------|--------|--------|
| 1     | 20.678         | 3636.9 | 93.9   | 87.768 |
| 2     | 22.922         | 506.9  | 12.8   | 12.232 |

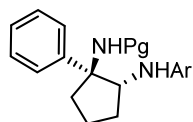

PG = 2-ClC<sub>6</sub>H<sub>4</sub>CO  
Ar = 2,5-(OMe)<sub>2</sub>Ph

**7a**: white solid; Mp 127.2 - 128.9 °C; 34.6 mg, 77% yield; 95% ee; dr >

19:1; [α]<sub>D</sub><sup>22</sup> -14.8 (*c* 1.0, CHCl<sub>3</sub>); <sup>1</sup>H NMR (300 MHz, Methylene

Chloride-*d*<sub>2</sub>) δ 7.54 – 7.46 (m, 3H), 7.46 – 7.40 (m, 2H), 7.40 – 7.33 (m,

3H), 7.33 – 7.27 (m, 1H), 6.99 (s, 1H), 6.59 (d, *J* = 8.7 Hz, 1H), 6.29 (d, *J* =

2.8 Hz, 1H), 6.10 (dd, *J* = 8.7, 2.8 Hz, 1H), 4.19 – 4.07 (m, 1H), 3.80 (d, *J* = 9.7 Hz, 1H),

3.68 (s, 3H), 3.60 (s, 3H), 3.05 – 2.90 (m, 1H), 2.60 – 2.46 (m, 1H), 2.22 – 2.11 (m, 1H), 2.10

– 1.94 (m, 2H), 1.44 – 1.32 (m, 1H); <sup>13</sup>C NMR (75 MHz, CD<sub>2</sub>Cl<sub>2</sub>) δ 165.0, 154.3, 141.2,

140.0, 137.7, 135.3, 130.6, 130.0, 129.6, 129.2, 127.7, 126.9, 126.6, 126.6, 110.1, 98.7, 98.0,

67.2, 61.2, 55.6, 54.9, 34.6, 28.1, 19.4; HRMS (ESI) *m/z* 451.1777 (M+H<sup>+</sup>), calc. for

C<sub>26</sub>H<sub>28</sub>ClN<sub>2</sub>O<sub>3</sub><sup>+</sup> 451.1783.

The ee was determined by HPLC analysis: CHIRALPAK IF (4.6 mm i.d. x 250 mm);

Hexane/2-propanol = 70/30; flow rate: 1.0 mL/min; 25 °C; 210 nm; retention time: 14.4 min

(major) and 16.0 min (minor).

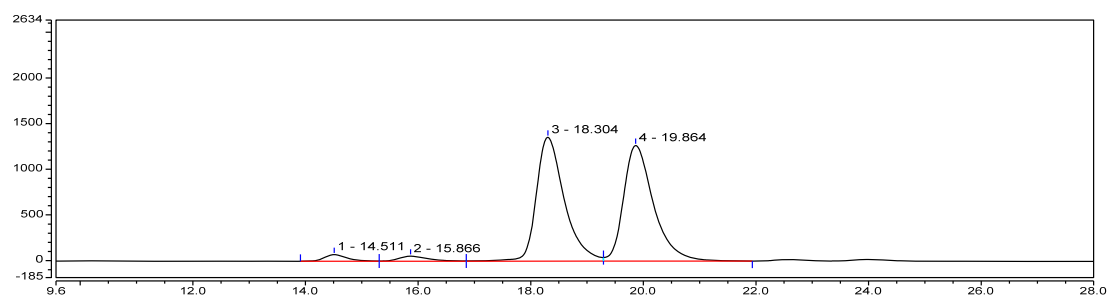

| Entry | Retention Time | Area     | Height  | %Area |
|-------|----------------|----------|---------|-------|
| 1     | 14.511         | 33.9225  | 72.50   | 2.08  |
| 2     | 15.866         | 33.6626  | 55.53   | 2.07  |
| 3     | 18.304         | 780.1998 | 1356.51 | 47.94 |
| 4     | 19.864         | 779.5285 | 1265.88 | 47.90 |

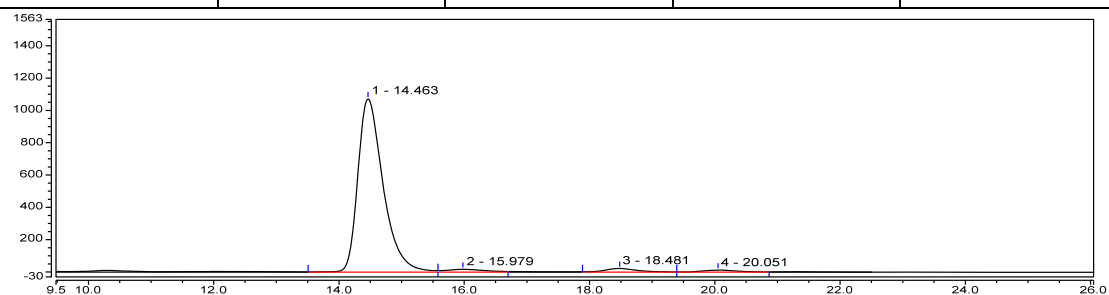

| Entry | Retention Time | Area     | Height  | %Area |
|-------|----------------|----------|---------|-------|
| 1     | 14.463         | 501.1897 | 1072.43 | 93.54 |
| 2     | 15.979         | 12.5353  | 17.54   | 2.34  |
| 3     | 18.481         | 13.6520  | 22.72   | 2.55  |
| 4     | 20.051         | 8.4155   | 12.91   | 1.57  |

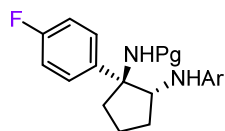

PG = 2-ClC<sub>6</sub>H<sub>4</sub>CO  
Ar = 2,5-(OMe)<sub>2</sub>Ph

**7b**: white solid; Mp 95.1 - 96.7 °C; 36.5 mg, 78% yield; 91% ee; dr > 19:1;  $[\alpha]_D^{22}$  +28.4 (*c* 1.0, CHCl<sub>3</sub>); <sup>1</sup>H NMR (300 MHz, Methylene Chloride-*d*<sub>2</sub>) δ 7.50 – 7.42 (m, 3H), 7.38 – 7.25 (m, 3H), 7.14 – 6.98 (m, 3H), 6.59 (d, *J* = 8.7 Hz, 1H), 6.29 (d, *J* = 2.8 Hz, 1H), 6.11 (dd, *J* = 8.7, 2.8 Hz, 1H), 4.12 (dd, *J* = 9.5, 6.3 Hz, 1H), 3.67 (s, 3H), 3.61 (s, 3H), 2.99 – 2.87 (m, 1H), 2.56 – 2.43 (m, 1H), 2.23 – 2.10 (m, 1H), 2.08 – 1.93 (m, 2H), 1.38 – 1.30 (m, 1H); <sup>13</sup>C NMR (75 MHz, CD<sub>2</sub>Cl<sub>2</sub>) δ 165.1, δ 161.6 (d, *J* = 245.4 Hz), 154.3, 141.3, 137.4, 135.8 (d, *J* = 3.2 Hz), 135.1, 130.7, 130.0, 129.6, 129.2, 128.4 (d, *J* = 8.1 Hz), 126.6, 114.3 (d, *J* = 21.2 Hz), 110.0, 99.0, 98.3, 66.9, 61.3, 55.5, 54.9, 34.7, 28.1, 19.2; <sup>19</sup>F NMR (565 MHz, CDCl<sub>3</sub>) δ –116.1; HRMS (ESI) *m/z* 469.1685 (M+H<sup>+</sup>), calc. for C<sub>26</sub>H<sub>27</sub>ClFN<sub>2</sub>O<sub>3</sub><sup>+</sup> 469.1689.

The ee was determined by HPLC analysis: CHIRALPAK IF (4.6 mm i.d. x 250 mm); Hexane/2-propanol = 60/40; flow rate: 1.0 mL/min; 25 °C; 210 nm; retention time: 9.4 min (major) and 11.7 min (minor).

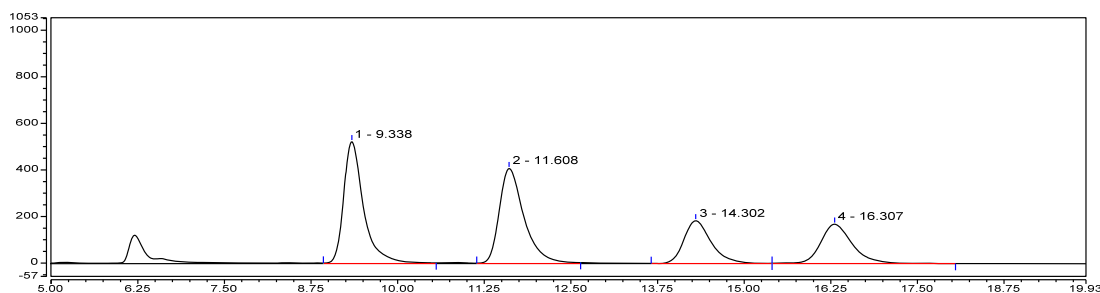

| Entry | Retention Time | Area     | Height | %Area |
|-------|----------------|----------|--------|-------|
| 1     | 9.338          | 176.1650 | 523.38 | 33.90 |
| 2     | 11.608         | 169.6291 | 408.16 | 32.64 |
| 3     | 14.302         | 84.5760  | 183.87 | 16.28 |
| 4     | 16.307         | 89.2707  | 169.04 | 17.18 |

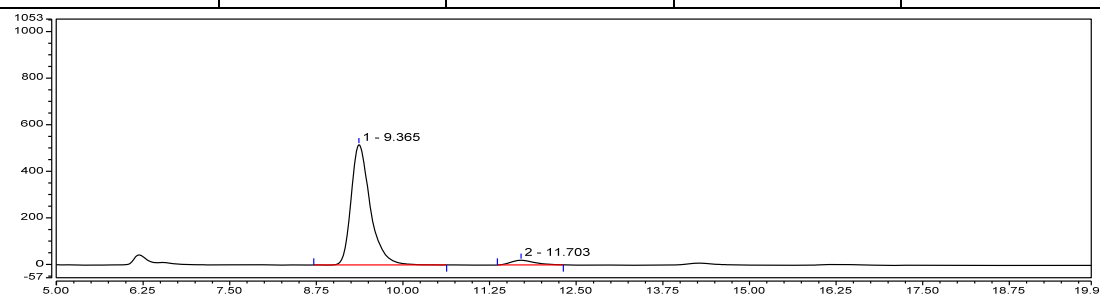

| Entry | Retention Time | Area     | Height | %Area |
|-------|----------------|----------|--------|-------|
| 1     | 9.365          | 164.5292 | 527.31 | 95.36 |
| 2     | 11.703         | 8.0115   | 13.7   | 4.64  |



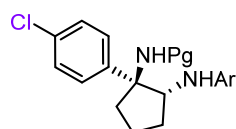

PG = 2-ClC<sub>6</sub>H<sub>4</sub>CO  
Ar = 2,5-(OMe)<sub>2</sub>Ph

**7c**: white solid; Mp 79.6-80.2 °C; 40.2 mg, 83% yield; 92% ee; dr >

19:1; [ $\alpha$ ]<sub>D</sub><sup>22</sup> +9.7 (*c* 1.0, CHCl<sub>3</sub>); <sup>1</sup>H NMR (300 MHz, Methylene

Chloride-*d*<sub>2</sub>)  $\delta$  7.49 (dd, *J* = 7.1, 1.8 Hz, 1H), 7.46 – 7.32 (m, 6H), 7.32

– 7.25 (m, 1H), 6.96 (s, 1H), 6.59 (d, *J* = 8.6 Hz, 1H), 6.27 (d, *J* = 2.8

Hz, 1H), 6.11 (dd, *J* = 8.7, 2.8 Hz, 1H), 4.20 – 4.05 (m, 1H), 3.80 – 3.59 (m, 7H), 3.00 – 2.85

(m, 1H), 2.54 – 2.42 (m, 1H), 2.24 – 2.11 (m, 1H), 2.09 – 1.89 (m, 2H), 1.44 – 1.29 (m, 1H);

<sup>13</sup>C NMR (75 MHz, CD<sub>2</sub>Cl<sub>2</sub>)  $\delta$  165.0, 154.4, 141.3, 138.8, 137.6, 135.1, 132.7, 130.8, 130.1,

129.6, 129.3, 128.3, 127.7, 126.6, 110.2, 99.1, 98.3, 67.1, 61.4, 55.6, 55.0, 34.7, 28.4, 19.3;

HRMS (ESI) *m/z* 485.1389 (M+H<sup>+</sup>), calc. for C<sub>26</sub>H<sub>27</sub>Cl<sub>2</sub>N<sub>2</sub>O<sub>3</sub><sup>+</sup> 485.1393.

The ee was determined by HPLC analysis: CHIRALPAK IG (4.6 mm i.d. x 250 mm);

Hexane/2-propanol = 50/50; flow rate: 1.0 mL/min; 25 °C; 210 nm; retention time: 9.9 min

(major) and 14.9 min (minor).

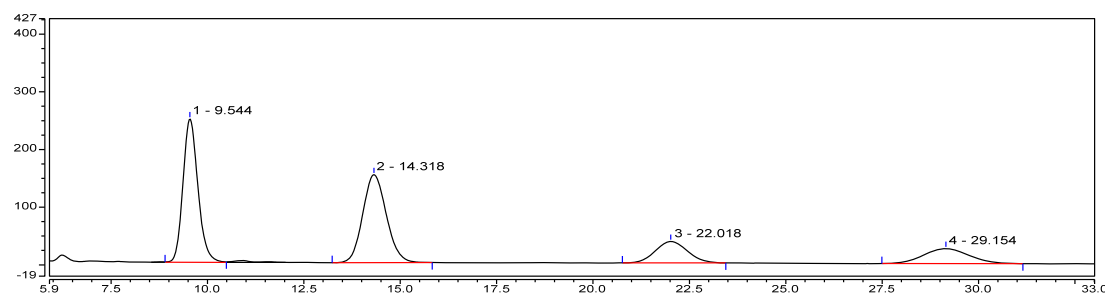

| Entry | Retention Time | Area     | Height | %Area |
|-------|----------------|----------|--------|-------|
| 1     | 9.544          | 111.9148 | 248.48 | 38.36 |
| 2     | 14.318         | 108.1226 | 152.40 | 37.06 |
| 3     | 22.018         | 35.9756  | 37.24  | 12.33 |
| 4     | 29.154         | 35.7082  | 25.98  | 12.24 |

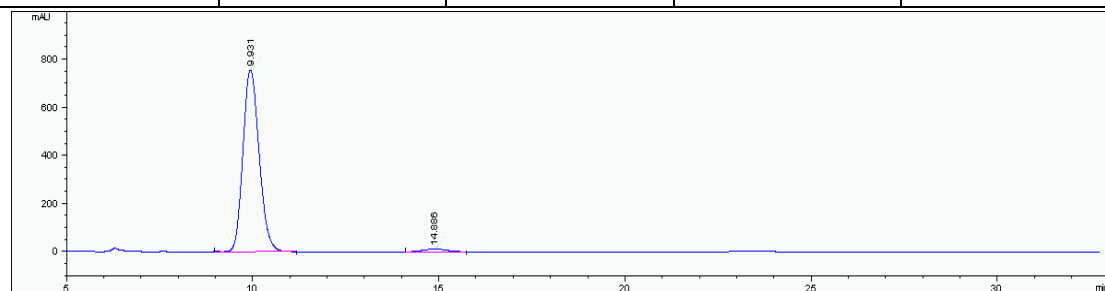

| Entry | Retention Time | Area    | Height | %Area  |
|-------|----------------|---------|--------|--------|
| 1     | 9.931          | 23254.6 | 760.6  | 95.869 |
| 2     | 14.886         | 1002.2  | 16.7   | 4.131  |

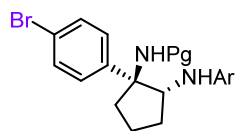

PG = 2-ClC<sub>6</sub>H<sub>4</sub>CO  
Ar = 2,5-(OMe)<sub>2</sub>Ph

**7d**: white solid; Mp 75.2 - 76.6 °C; 42.8 mg, 81% yield; 91% ee; dr >

19:1; [ $\alpha$ ]<sub>D</sub><sup>22</sup> +18.1 (*c* 1.0, CHCl<sub>3</sub>); <sup>1</sup>H NMR (300 MHz, Methylene

Chloride-*d*<sub>2</sub>)  $\delta$  7.55 – 7.46 (m, 3H), 7.40 – 7.32 (m, 4H), 7.31 – 7.24 (m,

1H), 7.05 (s, 1H), 6.60 (d, *J* = 8.7 Hz, 1H), 6.29 (d, *J* = 2.8 Hz, 1H),

6.12 (dd, *J* = 8.7, 2.8 Hz, 1H), 4.11 (dd, *J* = 9.7, 6.3 Hz, 1H), 3.67 (s, 3H), 3.61 (s, 3H), 2.99 –

2.87 (m, 1H), 2.53 – 2.41 (m, 1H), 2.22 – 2.10 (m, 1H), 2.05 – 1.90 (m, 2H), 1.37 – 1.27 (m,

1H); <sup>13</sup>C NMR (75 MHz, CD<sub>2</sub>Cl<sub>2</sub>)  $\delta$  165.0, 154.2, 141.2, 139.2, 135.0, 130.7, 130.7, 130.0,

129.6, 129.2, 128.6, 126.6, 120.9, 110.1, 99.3, 98.4, 67.0, 61.4, 55.5, 54.9, 34.7, 28.1, 19.2;

HRMS (ESI) *m/z* 529.0886 (M+H<sup>+</sup>), calc. for C<sub>26</sub>H<sub>27</sub>BrClN<sub>2</sub>O<sub>3</sub><sup>+</sup> 529.0888.

The ee was determined by HPLC analysis: CHIRALPAK IF (4.6 mm i.d. x 250 mm);

Hexane/2-propanol = 50/50; flow rate: 1.0 mL/min; 25 °C; 210 nm; retention time: 8.5 min

(major) and 11.6 min (minor).

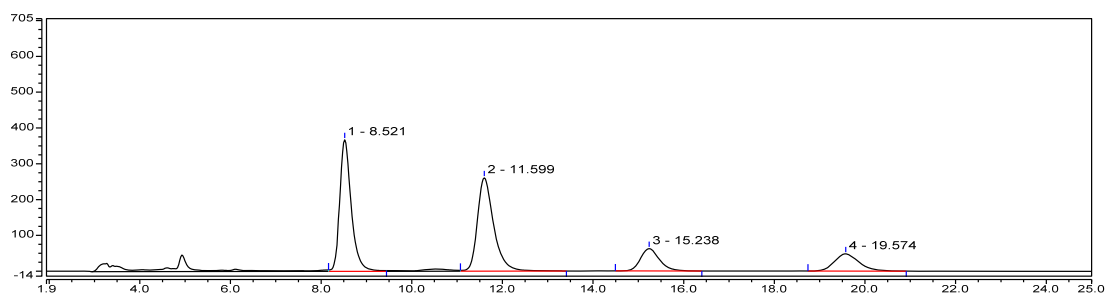

| Entry | Retention Time | Area     | Height | %Area |
|-------|----------------|----------|--------|-------|
| 1     | 8.521          | 108.4658 | 367.56 | 39.13 |
| 2     | 11.599         | 108.3417 | 260.56 | 39.08 |
| 3     | 15.238         | 30.1985  | 62.54  | 10.89 |
| 4     | 19.574         | 30.2029  | 48.08  | 10.90 |

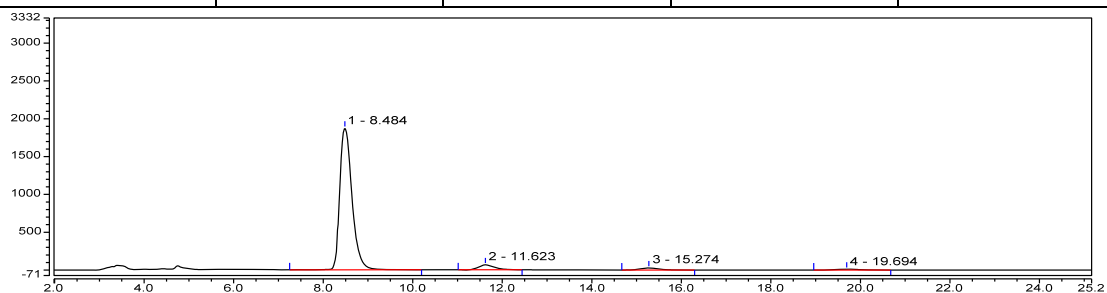

| Entry | Retention Time | Area     | Height  | %Area |
|-------|----------------|----------|---------|-------|
| 1     | 8.484          | 592.1098 | 1871.82 | 92.72 |
| 2     | 11.623         | 26.3369  | 65.11   | 4.12  |
| 3     | 15.274         | 13.0332  | 26.66   | 2.04  |
| 4     | 19.694         | 7.1301   | 11.48   | 1.12  |

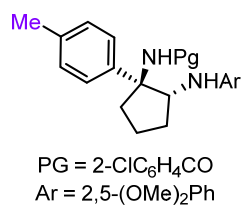

**7e**: white solid; Mp 74.8 - 75.9 °C; 34.8 mg, 75% yield; 94% ee; dr > 19:1;  $[\alpha]_D^{22} +20.1$  (*c* 1.0, CHCl<sub>3</sub>); <sup>1</sup>H NMR (300 MHz, Methylene Chloride-*d*<sub>2</sub>) δ 7.49 (dd, *J* = 7.5, 1.8 Hz, 1H), 7.39 – 7.32 (m, 4H), 7.29 (dd, *J* = 7.1, 2.4 Hz, 1H), 7.22 (d, *J* = 8.0 Hz, 2H), 6.90 (s, 1H), 6.58 (d, *J* = 8.6 Hz, 1H), 6.27 (d, *J* = 2.8 Hz, 1H), 6.08 (dd, *J* = 8.6, 2.8 Hz, 1H), 4.15 – 4.03 (m, 1H), 3.82 (d, *J* = 9.8 Hz, 1H), 3.67 (s, 3H), 3.60 (s, 3H), 3.00 – 2.89 (m, 1H), 2.54 – 2.43 (m, 1H), 2.37 (s, 3H), 2.20 – 2.10 (m, 1H), 2.07 – 1.94 (m, 2H), 1.35 – 1.25 (m, 1H); <sup>13</sup>C NMR (75 MHz, CD<sub>2</sub>Cl<sub>2</sub>) δ 165.0, 154.4, 141.2, 137.8, 137.0, 136.7, 135.4, 130.6, 130.0, 129.6, 129.2, 128.4, 126.6, 126.5, 110.2, 98.7, 98.0, 66.9, 61.2, 55.6, 54.9, 34.6, 28.0, 20.3, 19.3; HRMS (ESI) *m/z* 465.1937 (M+H<sup>+</sup>), calc. for C<sub>27</sub>H<sub>30</sub>ClN<sub>2</sub>O<sub>3</sub><sup>+</sup> 465.1939.

The ee was determined by HPLC analysis: CHIRALPAK IF (4.6 mm i.d. x 250 mm); Hexane/2-propanol = 60/40; flow rate: 1.0 mL/min; 25 °C; 210 nm; retention time: 12.0 min (major) and 15.4 min (minor).

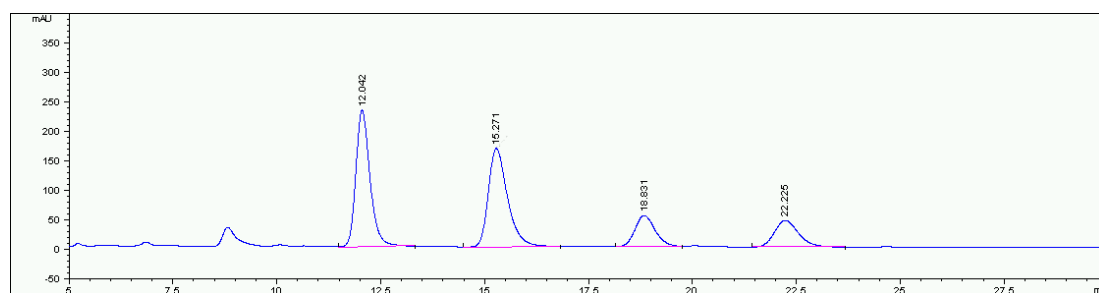

| Entry | Retention Time | Area   | Height | %Area  |
|-------|----------------|--------|--------|--------|
| 1     | 12.042         | 5599.4 | 233.2  | 37.738 |
| 2     | 15.271         | 5590.5 | 168.6  | 37.678 |
| 3     | 18.831         | 1806.6 | 52.9   | 12.176 |
| 4     | 22.225         | 1841   | 45.3   | 12.408 |

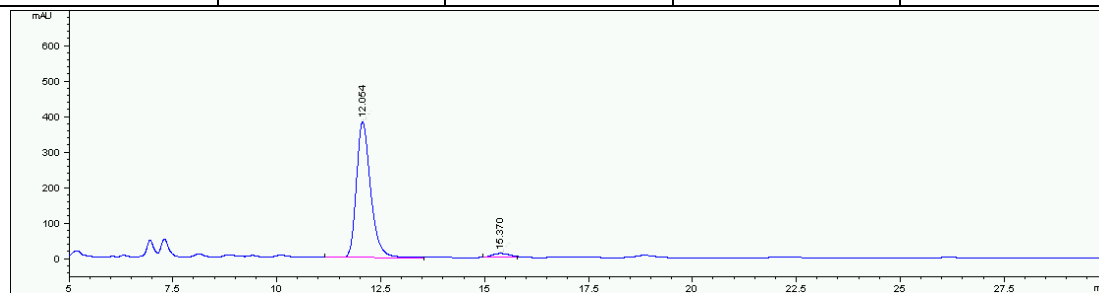

| Entry | Retention Time | Area   | Height | %Area  |
|-------|----------------|--------|--------|--------|
| 1     | 12.054         | 9189.7 | 382.5  | 96.851 |
| 2     | 15.37          | 298.8  | 10.5   | 3.149  |

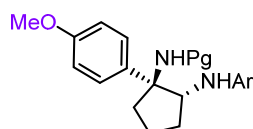

PG = 2-ClC<sub>6</sub>H<sub>4</sub>CO  
Ar = 2,5-(OMe)<sub>2</sub>Ph

**7f**: white solid; Mp 76.5 - 77.7 °C; 33.6 mg, 70% yield; 85% ee; dr >

19:1;  $[\alpha]_D^{22}$  +104.8 (*c* 1.0, CHCl<sub>3</sub>); <sup>1</sup>H NMR (300 MHz, Chloroform-d)

δ 7.48 (dd, *J* = 7.0, 2.1 Hz, 1H), 7.26 – 7.12 (m, 4H), 7.04 – 6.90 (m, 3H), 6.77 (dd, *J* = 7.8, 2.2 Hz, 1H), 6.51 (d, *J* = 8.6 Hz, 1H), 6.26 (d, *J*

= 2.8 Hz, 1H), 6.04 (dd, *J* = 8.7, 2.8 Hz, 1H), 4.15 – 4.04 (m, 1H), 3.70 (s, 3H), 3.62 (s, 3H),

3.54 (s, 3H), 3.02 – 2.88 (m, 1H), 2.53 – 2.38 (m, 1H), 2.13 – 2.01 (m, 1H), 1.99 – 1.85 (m,

2H), 1.40 – 1.24 (m, 1H); <sup>13</sup>C NMR (75 MHz, CD<sub>2</sub>Cl<sub>2</sub>) δ 165.4, 154.8, 141.7, 138.3, 137.4,

137.2, 135.8, 131.0, 130.5, 130.0, 129.7, 128.9, 127.0, 126.9, 110.6, 99.1, 98.4, 67.4, 61.6,

56.1, 55.4, 35.1, 28.4, 20.7, 19.8; HRMS (ESI) *m/z* 481.1885 (M+H<sup>+</sup>), calc. for

C<sub>27</sub>H<sub>30</sub>ClN<sub>2</sub>O<sub>4</sub><sup>+</sup> 481.1889.

The ee was determined by HPLC analysis: CHIRALPAK IG (4.6 mm i.d. x 250 mm) x 2;

Hexane/2-propanol = 95/5; flow rate: 1.0 mL/min; 25 °C; 210 nm; retention time: 41.5 min

(minor) and 44.1 min (major).

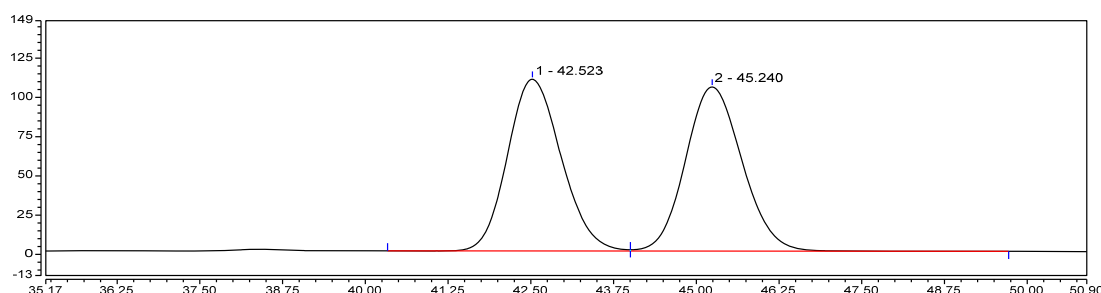

| Entry | Retention Time | Area     | Height | %Area |
|-------|----------------|----------|--------|-------|
| 1     | 42.523         | 103.0916 | 109.43 | 49.86 |
| 2     | 45.240         | 103.6894 | 104.59 | 50.14 |

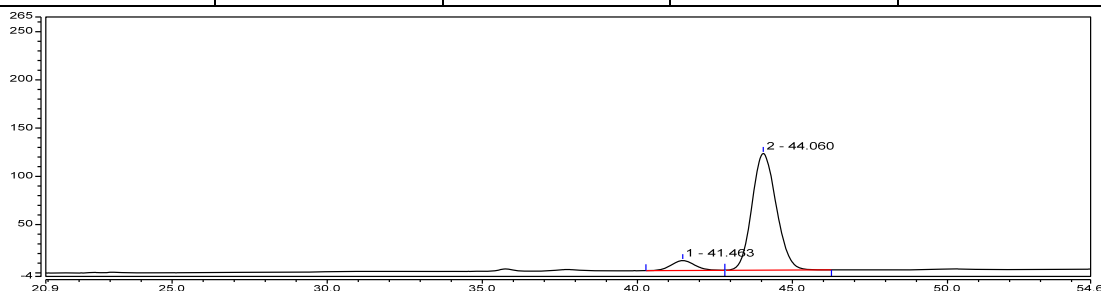

| Entry | Retention Time | Area     | Height | %Area |
|-------|----------------|----------|--------|-------|
| 1     | 41.463         | 9.0922   | 10.32  | 7.62  |
| 2     | 44.060         | 110.2388 | 120.97 | 92.38 |

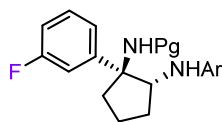

PG = 2-ClC<sub>6</sub>H<sub>4</sub>CO  
Ar = 2,5-(OMe)<sub>2</sub>Ph

**7g**: white solid; Mp 65.8 - 66.9 °C; 34.6 mg, 74% yield; 95% ee; dr =

14:1;  $[\alpha]_D^{22}$  +11.6 (*c* 1.0, CHCl<sub>3</sub>); <sup>1</sup>H NMR (300 MHz, Methylene

Chloride-*d*<sub>2</sub>) δ 7.52 – 7.46 (m, 1H), 7.42 – 7.33 (m, 3H), 7.32 – 7.25 (m,

2H), 7.20 (dt,  $J = 10.9, 2.2$  Hz, 1H), 7.09 – 6.99 (m, 2H), 6.61 (d,  $J = 8.7$  Hz, 1H), 6.28 (d,  $J = 2.8$  Hz, 1H), 6.11 (dd,  $J = 8.6, 2.8$  Hz, 1H), 4.20 4.06 (m, 1H), 3.79 (d,  $J = 10.3$  Hz, 1H), 3.68 (s, 3H), 3.63 (s, 3H), 3.02 – 2.89 (m, 1H), 2.56 – 2.43 (m, 1H), 2.24 – 2.12 (m, 1H), 2.08 – 1.94 (m, 2H), 1.43 – 1.33 (m, 1H);  $^{13}\text{C}$  NMR (75 MHz,  $\text{CD}_2\text{Cl}_2$ )  $\delta$  165.1, 162.4 (d,  $J = 244.6$  Hz), 154.3, 143.0 (d,  $J = 6.6$  Hz), 141.2, 137.5, 134.9, 130.8, 130.0, 129.6, 129.3, 129.1 (d,  $J = 8.3$  Hz), 126.6, 122.4 (d,  $J = 2.8$  Hz), 114.0, 113.8 (d,  $J = 3.2$  Hz), 113.5, 110.1, 99.0, 98.2, 67.2 (d,  $J = 1.6$  Hz), 61.4, 55.5, 54.9, 34.7, 28.2, 19.3;  $^{19}\text{F}$  NMR (376 MHz,  $\text{CD}_2\text{Cl}_2$ )  $\delta$  –113.8; HRMS (ESI)  $m/z$  469.1686 ( $\text{M}+\text{H}^+$ ), calc. for  $\text{C}_{26}\text{H}_{27}\text{ClFN}_2\text{O}_3^+$  469.1689.

The ee was determined by HPLC analysis: CHIRALPAK IG (4.6 mm i.d. x 250 mm); Hexane/2-propanol = 60/40; flow rate: 1.0 mL/min; 25 °C; 210 nm; retention time: 11.0 min (major) and 14.9 min (minor).

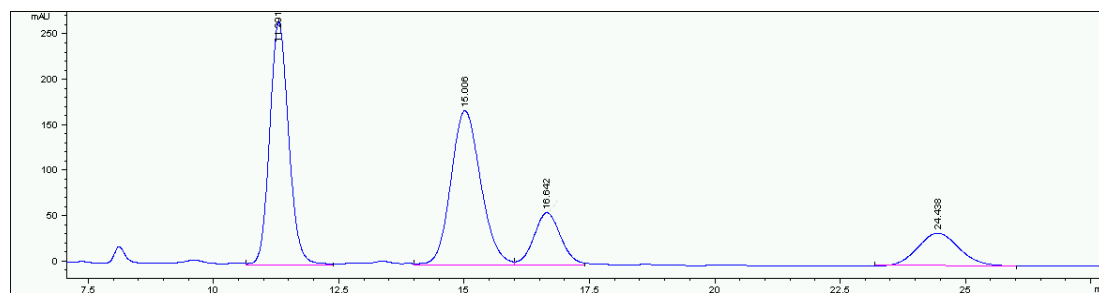

| Entry | Retention Time | Area   | Height | %Area  |
|-------|----------------|--------|--------|--------|
| 1     | 11.291         | 7107.4 | 267.7  | 38.332 |
| 2     | 15.006         | 7127.3 | 170.7  | 38.439 |
| 3     | 16.642         | 2216.2 | 58.4   | 11.952 |
| 4     | 24.438         | 2090.9 | 36.1   | 11.277 |

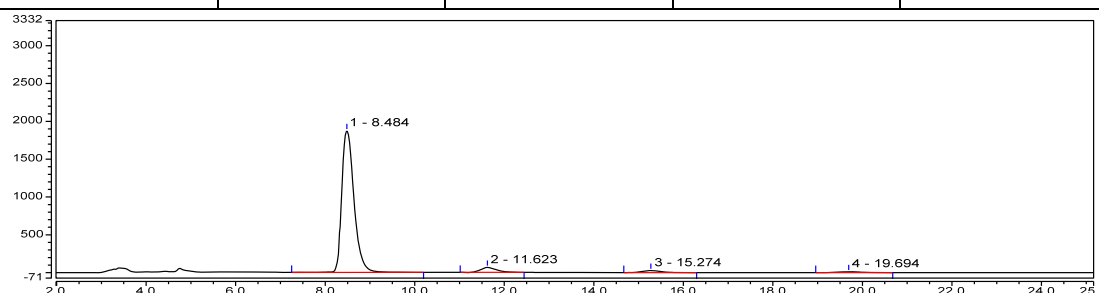

| Entry | Retention Time | Area    | Height | %Area  |
|-------|----------------|---------|--------|--------|
| 1     | 11.048         | 32569.6 | 1114   | 91.090 |
| 2     | 14.93          | 861     | 18.7   | 2.408  |
| 3     | 16.678         | 1937.6  | 50.2   | 5.419  |
| 4     | 24.332         | 387.2   | 6.5    | 1.083  |

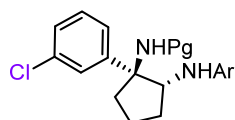

PG = 2-ClC<sub>6</sub>H<sub>4</sub>CO  
Ar = 2,5-(OMe)<sub>2</sub>Ph

**7h**: white solid; Mp 67.9 - 68.9 °C; 38.2 mg, 79% yield; 94% ee; dr =

15:1; [ $\alpha$ ]<sub>D</sub><sup>22</sup> -13.1 (*c* 1.0, CHCl<sub>3</sub>); <sup>1</sup>H NMR (300 MHz, Methylene

Chloride-*d*<sub>2</sub>)  $\delta$  7.53 – 7.46 (m, 2H), 7.41 – 7.33 (m, 4H), 7.32 – 7.25 (m,

2H), 6.96 (s, 1H), 6.60 (d, *J* = 8.7 Hz, 1H), 6.27 (d, *J* = 2.8 Hz, 1H),

6.10 (dd, *J* = 8.6, 2.9 Hz, 1H), 4.19 – 4.06 (m, 1H), 3.77 (d, *J* = 10.5 Hz, 1H), 3.67 (s, 3H),

3.64 (s, 2.80H), 3.36 (s, 0.20H), 3.02 – 2.89 (m, 1H), 2.54 – 2.40 (m, 1H), 2.24 – 2.11 (m 1H),

2.08 – 1.94 (m, 2H), 1.41 – 1.29 (m, 1H); <sup>13</sup>C NMR (75 MHz, CD<sub>2</sub>Cl<sub>2</sub>)  $\delta$  165.1, 154.4, 142.4,

141.2, 137.5, 135.0, 133.8, 130.8, 130.1, 129.7, 129.3, 129.0, 127.0, 127.0, 126.7, 125.0,

110.2, 99.1, 98.2, 67.2, 61.4, 55.7, 55.0, 34.7, 28.3, 19.3; HRMS (ESI) *m/z* 485.1389 (M+H<sup>+</sup>),

calc. for C<sub>26</sub>H<sub>27</sub>Cl<sub>2</sub>N<sub>2</sub>O<sub>3</sub><sup>+</sup> 485.1393.

The ee was determined by HPLC analysis: CHIRAL MQ (x 2) (4.6 mm i.d. x 250 mm);

Hexane/2-propanol = 70/30; flow rate: 1.0 mL/min; 25 °C; 210 nm; retention time: 8.4 min

(minor) and 9.2 min (major).

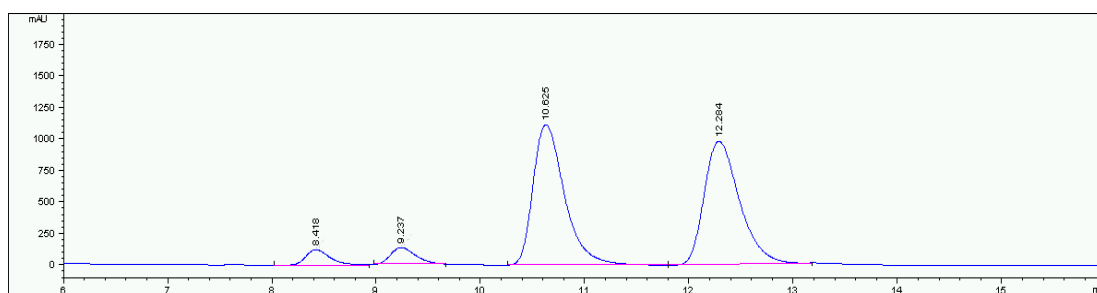

| Entry | Retention Time | Area    | Height | %Area  |
|-------|----------------|---------|--------|--------|
| 1     | 8.418          | 2240.2  | 127.8  | 4.360  |
| 2     | 9.237          | 2180.1  | 131.9  | 4.243  |
| 3     | 10.625         | 23570.2 | 1116.1 | 45.876 |
| 4     | 12.284         | 23388   | 981.4  | 45.521 |

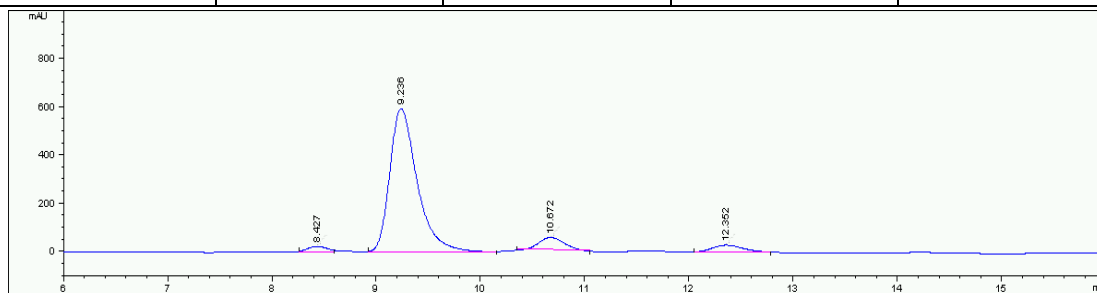

| Entry | Retention Time | Area    | Height | %Area  |
|-------|----------------|---------|--------|--------|
| 1     | 8.427          | 351.2   | 25.4   | 2.728  |
| 2     | 9.236          | 11082.6 | 596.4  | 86.097 |
| 3     | 10.672         | 860.1   | 51.4   | 6.682  |
| 4     | 12.352         | 578.4   | 28.6   | 4.493  |

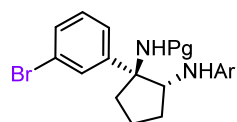

PG = 2-ClC<sub>6</sub>H<sub>4</sub>CO  
Ar = 2,5-(OMe)<sub>2</sub>Ph

**7i**: white solid; Mp 89.7 - 90.3 °C; 42.8 mg, 81% yield; 95% ee; dr = 17:1;  $[\alpha]_D^{22}$  +17.2 (*c* 1.0, CHCl<sub>3</sub>); <sup>1</sup>H NMR (300 MHz, Methylene Chloride-*d*<sub>2</sub>) δ 7.67 – 7.61 (m, 1H), 7.52 – 7.44 (m, 2H), 7.43 – 7.33 (m, 3H), 7.33 – 7.24 (m, 2H), 6.97 (s, 1H), 6.60 (d, *J* = 8.6 Hz, 1H), 6.26 (d, *J* = 2.8 Hz, 1H), 6.10 (dd, *J* = 8.6, 2.8 Hz, 1H), 4.18 – 4.04 (m, 1H), 3.78 (d, *J* = 10.0 Hz, 1H), 3.67 (s, 3H), 3.65 (s, 2.83H), 3.36 (s, 0.17H), 3.02 – 2.86 (m, 1H), 2.56 – 2.34 (m, 1H), 2.23 – 2.11 (m, 1H), 2.09 – 1.92 (m, 2H), 1.39 – 1.27 (m, 1H); <sup>13</sup>C NMR (75 MHz, CD<sub>2</sub>Cl<sub>2</sub>) δ 165.1, 154.3, 142.6, 141.2, 137.4, 135.0, 130.8, 130.0, 129.9, 129.9, 129.6, 129.2, 129.2, 126.6, 125.4, 122.0, 110.1, 99.0, 98.1, 67.1, 61.3, 55.6, 54.9, 34.6, 28.2, 19.3; HRMS (ESI) *m/z* 529.0883 (M+H<sup>+</sup>), calc. for C<sub>26</sub>H<sub>27</sub>BrClN<sub>2</sub>O<sub>3</sub><sup>+</sup> 529.0888.

The ee was determined by HPLC analysis: CHIRAL MQ (x 2) (4.6 mm i.d. x 250 mm); Hexane/2-propanol = 70/30; flow rate: 1.0 mL/min; 25 °C; 210 nm; retention time: 8.9 min (minor) and 9.7 min (major).

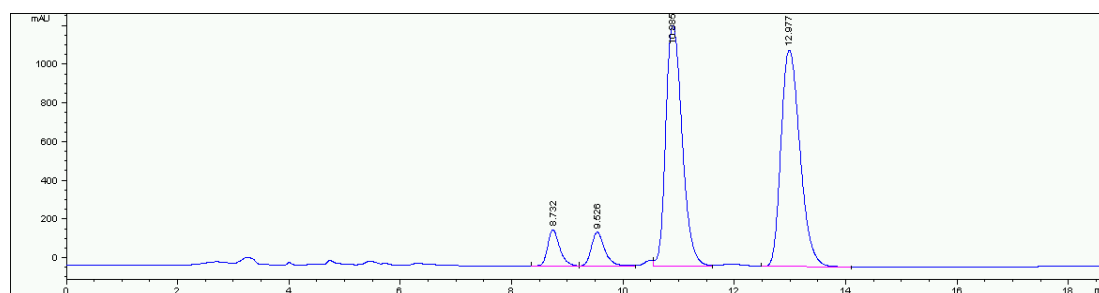

| Entry | Retention Time | Area    | Height | %Area  |
|-------|----------------|---------|--------|--------|
| 1     | 8.732          | 2905.4  | 189    | 4.977  |
| 2     | 9.526          | 3076.3  | 177.7  | 5.270  |
| 3     | 10.885         | 25720   | 1246.2 | 44.061 |
| 4     | 12.977         | 26671.6 | 1121   | 45.691 |

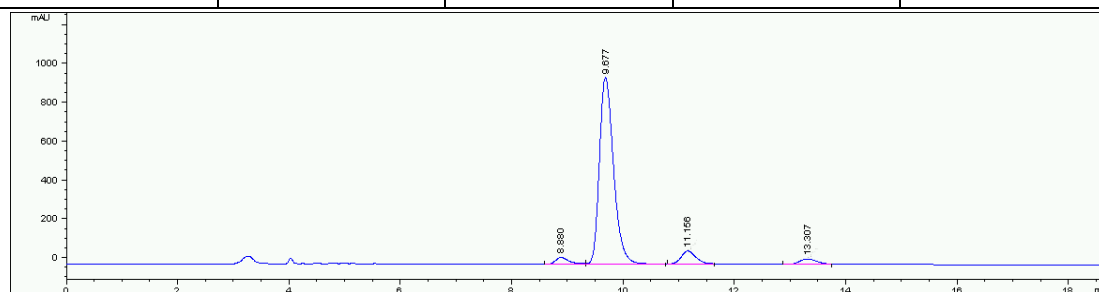

| Entry | Retention Time | Area    | Height | %Area  |
|-------|----------------|---------|--------|--------|
| 1     | 8.88           | 615.7   | 35.5   | 3.130  |
| 2     | 9.677          | 17062.4 | 961.2  | 86.753 |
| 3     | 11.156         | 1336.8  | 69.2   | 6.797  |
| 4     | 13.307         | 653     | 29.2   | 3.320  |

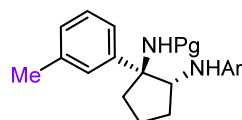

PG = 2-ClC<sub>6</sub>H<sub>4</sub>CO  
Ar = 2,5-(OMe)<sub>2</sub>Ph

**7j**: white solid; Mp 151.7 - 152.3 °C; 30.6 mg, 66% yield; 94% ee; dr = 18:1;  $[\alpha]_D^{22}$  -9.2 (*c* 1.0, CHCl<sub>3</sub>); <sup>1</sup>H NMR (300 MHz, Methylene Chloride-*d*<sub>2</sub>) δ 7.54 – 7.45(m, 1H), 7.38 – 7.32 (m, 2H), 7.32 – 7.22 (m, 4H), 7.21 – 7.10 (m, 1H), 6.91 (s, 1H), 6.58 (d, *J* = 8.6 Hz, 1H), 6.27 (d, *J* = 2.8 Hz, 1H), 6.08 (dd, *J* = 8.6, 2.9 Hz, 1H), 4.09 (td, *J* = 9.8, 6.2 Hz, 1H), 3.84 (d, *J* = 9.9 Hz, 1H), 3.67 (s, 3H), 3.60 (s, 2.84H), 3.30 (s, 0.16H), 3.05 – 2.89 (m, 1H), 2.56 – 2.43 (m, 1H), 2.39 (s, 3H), 2.21 – 2.11 (m, 1H), 2.09 – 1.94 (m, 2H), 1.38 – 1.28 (m, 1H); <sup>13</sup>C NMR (75 MHz, CD<sub>2</sub>Cl<sub>2</sub>) δ 165.0, 154.4, 141.2, 140.0, 137.8, 137.5, 135.4, 130.6, 130.1, 129.6, 129.2, 127.7, 127.6, 127.4, 126.6, 123.6, 110.2, 98.7, 98.0, 67.0, 61.1, 55.6, 54.9, 34.6, 28.0, 21.0, 19.4; HRMS (ESI) *m/z* 465.1936 (M+H<sup>+</sup>), calc. for C<sub>27</sub>H<sub>30</sub>ClN<sub>2</sub>O<sub>3</sub><sup>+</sup> 465.1939.

The ee was determined by HPLC analysis: CHIRAL INB (x 2) (4.6 mm i.d. x 250 mm); Hexane/2-propanol = 80/20; flow rate: 1.0 mL/min; 25 °C; 210 nm; retention time: 19.1 min (minor) and 20.4 min (major).

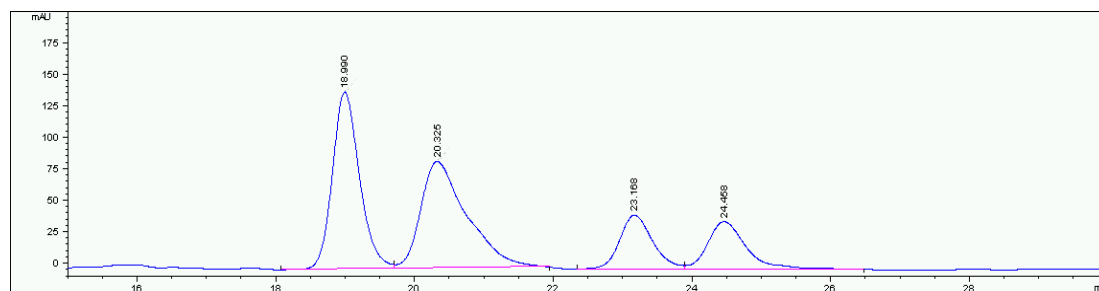

| Entry | Retention Time | Area   | Height | %Area  |
|-------|----------------|--------|--------|--------|
| 1     | 18.99          | 3798.4 | 140.2  | 35.825 |
| 2     | 20.325         | 3860.3 | 84.3   | 36.409 |
| 3     | 23.168         | 1448.4 | 43.2   | 13.661 |
| 4     | 24.458         | 1495.5 | 38     | 14.105 |

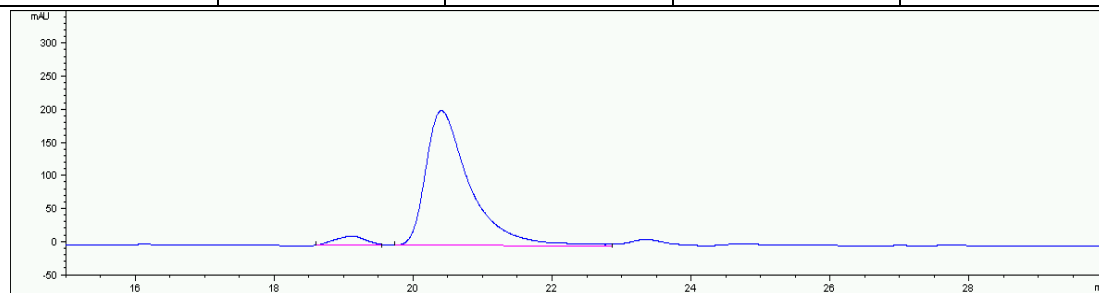

| Entry | Retention Time | Area   | Height | %Area  |
|-------|----------------|--------|--------|--------|
| 1     | 19.111         | 466.2  | 14.6   | 4.902  |
| 2     | 20.402         | 9045.8 | 204.5  | 95.098 |



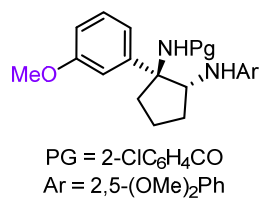

**7k**: white solid; Mp 145.0 - 146.6 °C; 33.6 mg, 70% yield; 85% ee; dr = 16:1;  $[\alpha]_D^{22}$  -12.3 (*c* 1.0, CHCl<sub>3</sub>); <sup>1</sup>H NMR (300 MHz, Chloroform-*d*) δ 7.55 (dd, *J* = 7.0, 2.1 Hz, 1H), 7.34 – 7.21 (m, 4H), 7.12 – 6.97 (m, 3H), 6.84 (dd, *J* = 7.7, 2.2 Hz, 1H), 6.58 (d, *J* = 8.6 Hz, 1H), 6.33 (d, *J* = 2.8 Hz, 1H), 6.11 (dd, *J* = 8.7, 2.8 Hz, 1H), 4.15 (dd, *J* = 10.2, 6.2 Hz, 1H), 3.85 – 3.72 (m, 4H), 3.69 (s, 3H), 3.61 (s, 2.82H), 3.33 (s, 0.18H), 3.10 – 2.95 (m, 1H), 2.59 – 2.44 (m, 1H), 2.18 – 2.08 (m, 1H), 2.06 – 1.94 (m, 2H), 1.46 – 1.30 (m, 1H); <sup>13</sup>C NMR (75 MHz, CDCl<sub>3</sub>) δ 165.5, 159.5, 154.7, 141.7, 141.6, 135.2, 131.1, 130.5, 130.2, 130.1, 129.1, 127.0, 119.3, 112.9, 112.9, 110.6, 98.6, 67.6, 61.5, 56.0, 55.5, 55.1, 35.0, 28.2, 19.8; HRMS (ESI) *m/z* 481.1884 (M+H<sup>+</sup>), calc. for C<sub>27</sub>H<sub>30</sub>ClN<sub>2</sub>O<sub>4</sub><sup>+</sup> 481.1889.

The ee was determined by HPLC analysis: CHIRAL MQ (x 2) (4.6 mm i.d. x 250 mm); Hexane/2-propanol = 60/40; flow rate: 1.0 mL/min; 25 °C; 210 nm; retention time: 9.9 min (minor) and 11.8 min (major).

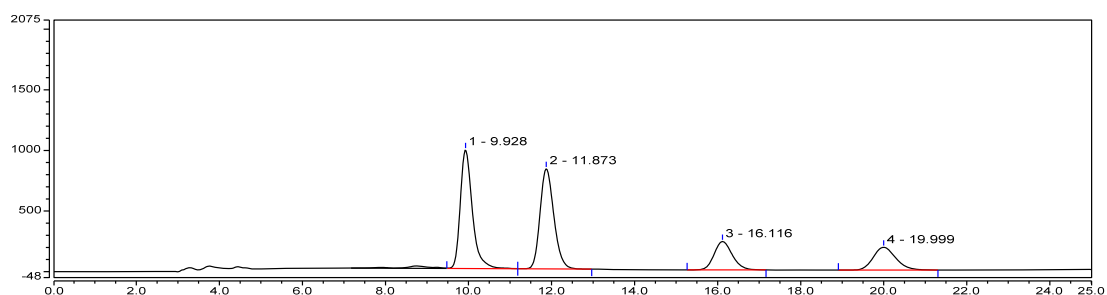

| Entry | Retention Time | Area     | Height | %Area |
|-------|----------------|----------|--------|-------|
| 1     | 9.928          | 332.6943 | 979.17 | 37.52 |
| 2     | 11.873         | 317.8988 | 825.87 | 35.85 |
| 3     | 16.116         | 118.2555 | 233.89 | 13.34 |
| 4     | 19.999         | 117.8002 | 187.98 | 13.29 |

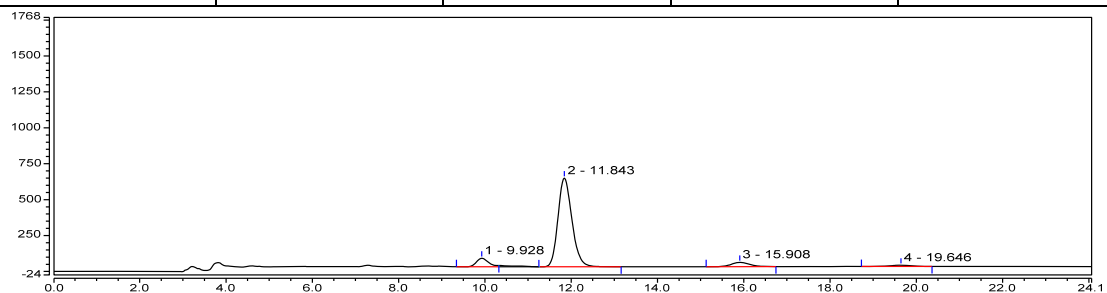

| Entry | Retention Time | Area     | Height | %Area |
|-------|----------------|----------|--------|-------|
| 1     | 9.928          | 19.1229  | 59.40  | 7.07  |
| 2     | 11.843         | 231.4137 | 617.64 | 85.61 |
| 3     | 15.908         | 14.7764  | 30.12  | 5.47  |
| 4     | 19.646         | 4.9919   | 8.75   | 1.85  |

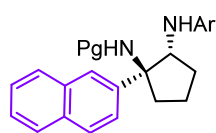

PG = 2-ClC<sub>6</sub>H<sub>4</sub>CO  
Ar = 2,5-(OMe)<sub>2</sub>Ph

**7I**: white solid; Mp 177.7 - 178.2 °C; 40.5 mg, 81% yield; 93% ee; dr > 19:1;  $[\alpha]_D^{22} +11.5$  (c 1.0, CHCl<sub>3</sub>); <sup>1</sup>H NMR (300 MHz, Methylene Chloride-*d*<sub>2</sub>) δ 7.96 (d, *J* = 2.0 Hz, 1H), 7.92 – 7.82 (m, 3H), 7.62 (dd, *J* = 8.7, 2.0 Hz, 1H), 7.56 – 7.48(m, 3H), 7.40 – 7.24 (m, 3H), 7.06 (s, 1H), 6.55 (d, *J* = 8.6 Hz, 1H), 6.32 (d, *J* = 2.8 Hz, 1H), 6.09 (dd, *J* = 8.6, 2.8 Hz, 1H), 4.23 (m, 1H), 3.86 (s, 1H), 3.68 (s, 3H), 3.47 (s, 3H), 3.20 – 3.06 (m, 1H), 2.69 – 2.55 (m, 1H), 2.24 – 2.05 (m, 3H), 1.50 – 1.37 (m, 1H); <sup>13</sup>C NMR (75 MHz, CDCl<sub>3</sub>) δ 165.5, 154.7, 141.6, 138.1, 137.6, 135.2, 133.1, 132.7, 131.2, 130.6, 130.2, 130.1, 128.3, 127.8, 127.4, 127.0, 126.3, 126.0, 125.9, 125.0, 110.5, 99.3, 98.6, 67.9, 61.8, 55.9, 55.5, 34.9, 28.6, 19.9; HRMS (ESI) *m/z* 501.1935 (M+H<sup>+</sup>), calc. for C<sub>30</sub>H<sub>30</sub>ClN<sub>2</sub>O<sub>3</sub><sup>+</sup> 501.1939.

The ee was determined by HPLC analysis: CHIRALPAK IF (4.6 mm i.d. x 250 mm); Hexane/2-propanol = 60/40; flow rate: 1.0 mL/min; 25 °C; 210 nm; retention time: 14.8 min (major) and 17.8 min (minor).

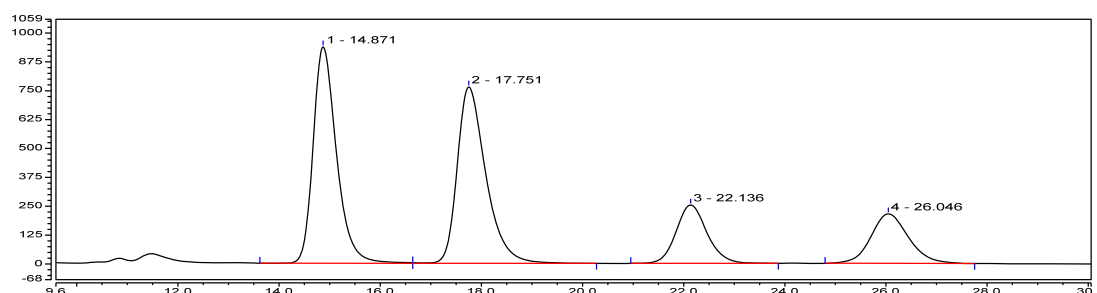

| Entry | Retention Time | Area     | Height | %Area |
|-------|----------------|----------|--------|-------|
| 1     | 14.871         | 501.4384 | 936.70 | 36.74 |
| 2     | 17.751         | 499.8335 | 763.70 | 36.63 |
| 3     | 22.136         | 179.4012 | 252.80 | 13.15 |
| 4     | 26.046         | 184.0268 | 214.23 | 13.48 |

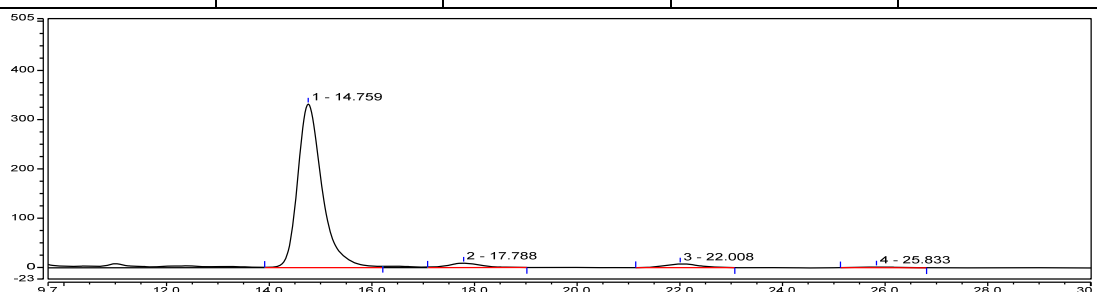

| Entry | Retention Time | Area     | Height | %Area |
|-------|----------------|----------|--------|-------|
| 1     | 14.759         | 182.8219 | 331.95 | 93.18 |
| 2     | 17.788         | 6.4814   | 9.01   | 3.30  |
| 3     | 22.008         | 5.6387   | 7.56   | 2.87  |
| 4     | 25.833         | 1.2655   | 1.64   | 0.64  |

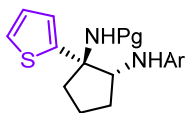

**7m**: white solid; Mp 56.1 - 57.0 °C; 36.0 mg, 79% yield; 93% ee; dr > 19:1;

$[\alpha]_D^{22}$  -10.4 (*c* 1.0, CHCl<sub>3</sub>); <sup>1</sup>H NMR (300 MHz, Methylene Chloride-*d*<sub>2</sub>) δ

PG = 2-ClC<sub>6</sub>H<sub>4</sub>CO  
Ar = 2,5-(OMe)<sub>2</sub>Ph

7.54 – 7.49 (m, 1H), 7.37 – 7.32 (m, 2H), 7.32 – 7.27 (m, 2H), 7.10 (dd, *J* =

3.6, 1.3 Hz, 1H), 7.05 (dd, *J* = 5.0, 3.6 Hz, 1H), 6.90 (s, 1H), 6.61 (d, *J* =

8.6 Hz, 1H), 6.28 (d, *J* = 2.7 Hz, 1H), 6.14 – 6.06 (m, 1H), 4.19 – 4.08 (m, 2H), 3.66 (s, 3H),

3.65 (s, 3H), 2.97 – 2.86 (m, 1H), 2.60 – 2.50 (m, 1H), 2.26 – 2.16 (m, 1H), 2.05 – 1.96 (m,

2H), 1.49 – 1.38 (m, 1H); <sup>13</sup>C NMR (75 MHz, CD<sub>2</sub>Cl<sub>2</sub>) δ 165.2, 154.4, 144.9, 141.3, 137.8,

135.2, 130.7, 130.0, 129.6, 129.2, 126.6, 126.4, 124.8, 124.2, 110.3, 99.0, 98.1, 65.9, 61.3,

55.7, 54.9, 36.6, 27.8, 18.8; HRMS (ESI) *m/z* 457.1340 (M+H<sup>+</sup>), calc. for C<sub>24</sub>H<sub>26</sub>ClN<sub>2</sub>O<sub>3</sub>S<sup>+</sup>

457.1347.

The ee was determined by HPLC analysis: CHIRALPAK IF (4.6 mm i.d. x 250 mm);

Hexane/2-propanol = 60/40; flow rate: 1.0 mL/min; 25 °C; 210 nm; retention time: 14.8 min

(major) and 17.8 min (minor).

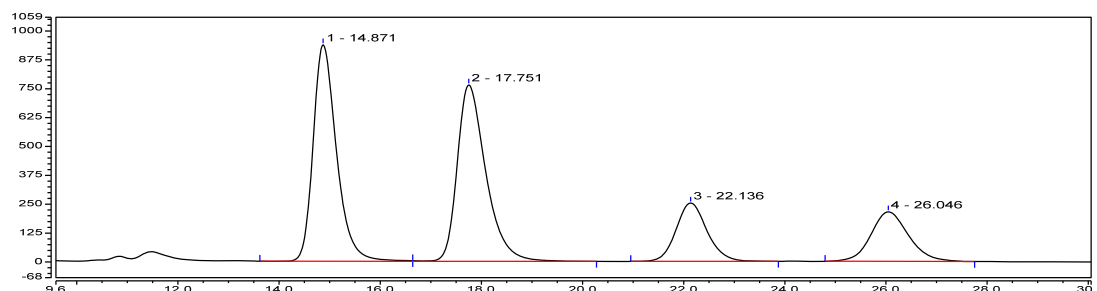

| Entry | Retention Time | Area     | Height | %Area |
|-------|----------------|----------|--------|-------|
| 1     | 14.871         | 501.4384 | 936.70 | 36.74 |
| 2     | 17.751         | 499.8335 | 763.70 | 36.63 |
| 3     | 22.136         | 179.4012 | 252.80 | 13.15 |
| 4     | 26.046         | 184.0268 | 214.23 | 13.48 |

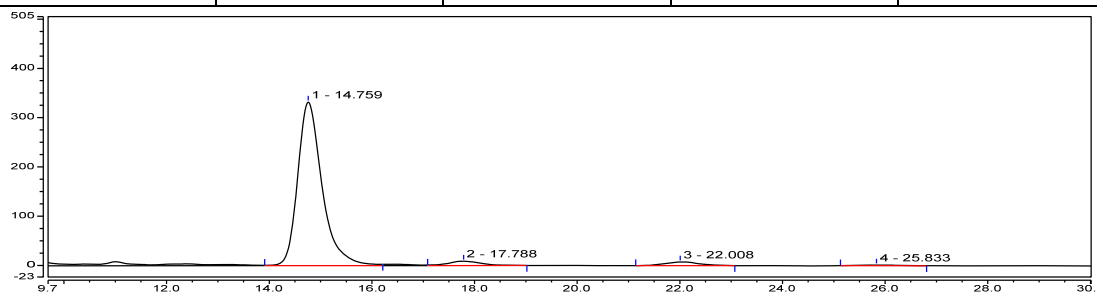

| Entry | Retention Time | Area     | Height | %Area |
|-------|----------------|----------|--------|-------|
| 1     | 14.759         | 182.8219 | 331.95 | 93.18 |
| 2     | 17.788         | 6.4814   | 9.01   | 3.30  |
| 3     | 22.008         | 5.6387   | 7.56   | 2.87  |
| 4     | 25.833         | 1.2655   | 1.64   | 0.64  |

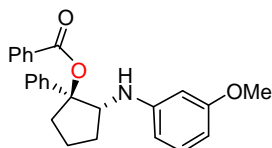

**9**: yellow solid; Mp 83.2 - 83.9 °C; 23.2 mg, 60% yield; 80% ee; dr

= 7:1;  $[\alpha]_D^{22} +15.3$  (*c* 1.0, CHCl<sub>3</sub>); <sup>1</sup>H NMR (300 MHz, CDCl<sub>3</sub>) δ

7.99 (dd, *J* = 23.6, 7.6 Hz, 2H), 7.54 (t, *J* = 7.4 Hz, 1H), 7.40 (d, *J* =

7.6 Hz, 2H), 7.38 – 7.25 (m, 5H), 7.07 (dt, *J* = 34.4, 8.1 Hz, 1H), 6.45 4.01 (m, 3H), 4.47 (dd,

*J* = 9.9, 6.5 Hz, 1H), 3.75 (d, *J* = 35.2 Hz, 3H), 3.17 – 3.03 (m, 1H), 2.57 – 2.42 (m, 1H), 2.20

– 1.82 (m, 3H), 1.58 – 1.39 (m, 1H); <sup>13</sup>C NMR (75 MHz, CDCl<sub>3</sub>) δ 165.5, 160.8, 148.6, 139.0,

132.8, 130.6, 129.9, 129.8, 128.2, 128.2, 127.8, 126.4, 107.0, 102.4, 100.0, 91.8, 62.3, 55.1,

34.1, 28.5, 19.2; HRMS (ESI) *m/z* 410.1725 (M+Na<sup>+</sup>), calc. for C<sub>25</sub>H<sub>25</sub>NO<sub>3</sub>Na 410.1727.

The ee was determined by HPLC analysis: CHIRAL AD-H (4.0 mm i.d. x 100 mm);

Hexane/2-propanol = 95/5; flow rate: 1.0 mL/min; 25 °C; 230 nm; retention time: 9.8 min

(major) and 14.1 min (minor).

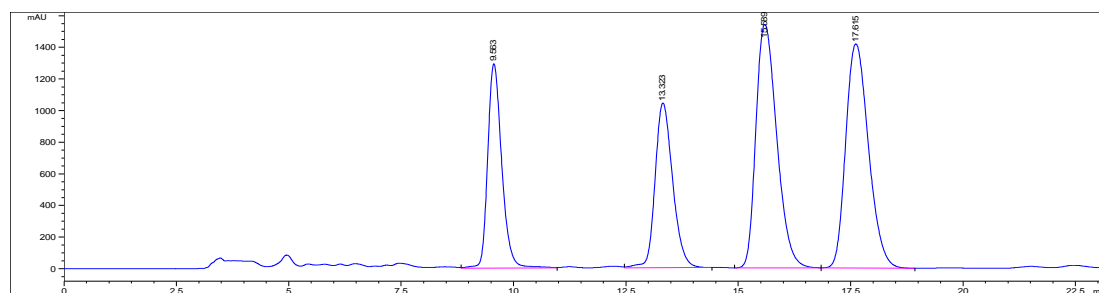

| Entry | Retention Time | Area    | Height | %Area  |
|-------|----------------|---------|--------|--------|
| 1     | 9.563          | 28044.9 | 1292.7 | 17.973 |
| 2     | 13.323         | 28254.2 | 1041.2 | 18.107 |
| 3     | 15.589         | 49777.9 | 1541   | 31.900 |
| 4     | 17.615         | 49964.4 | 1418.8 | 32.020 |

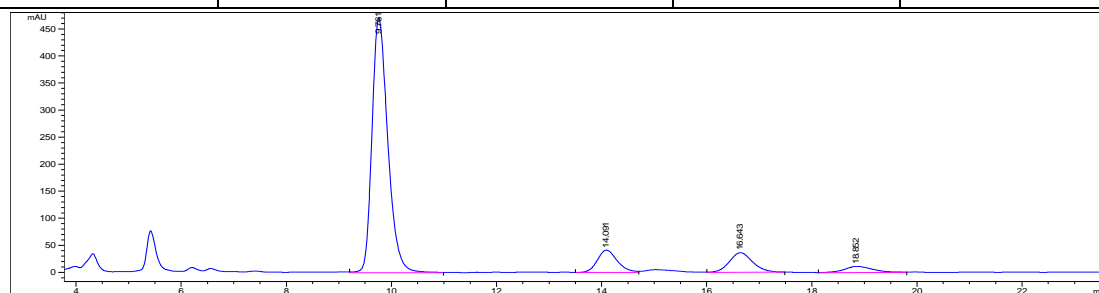

| Entry | Retention Time | Area   | Height | %Area  |
|-------|----------------|--------|--------|--------|
| 1     | 9.761          | 9844.6 | 471.3  | 78.807 |
| 2     | 14.091         | 1090.4 | 41.2   | 8.729  |
| 3     | 16.643         | 1119.8 | 36.2   | 8.964  |
| 4     | 18.852         | 437.2  | 11.5   | 3.500  |

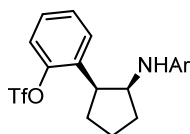

Ar = 2-OCH<sub>2</sub>-(2,6-Me<sub>2</sub>-Ph)-5-OMePh

**11a**: yellow oil; 43.9 mg, 80% yield; 84% ee; dr > 19:1; [ $\alpha$ ]<sub>D</sub><sup>22</sup> -24.5 (*c* 1.0, CHCl<sub>3</sub>); <sup>1</sup>H NMR (300 MHz, Chloroform-*d*)  $\delta$  7.24 – 7.18 (m, 2H), 7.13 – 7.07 (m, 4H), 6.91 – 6.84 (m, 1H), 6.73 – 6.67 (m, 1H), 6.12 (d, *J* = 7.4 Hz, 2H), 4.83 (s, 2H), 4.02 – 3.96 (m, 1H), 3.71 (s, 3H), 3.61 – 3.55 (m, 1H), 2.26 (s, 6H), 2.22 – 2.17 (m, 1H), 2.06 – 1.99 (m, 2H), 1.93 – 1.70 (m, 3H); <sup>13</sup>C NMR (75 MHz, CDCl<sub>3</sub>)  $\delta$  154.8, 148.1, 140.9, 138.2, 133.3, 133.2, 129.6, 128.3, 128.2, 128.1, 128.0, 121.0, 118.5 (q, *J* = 320.1 Hz), 111.5, 99.6, 98.5, 65.6, 55.5, 42.8, 33.2, 29.6, 22.7, 19.5; <sup>19</sup>F NMR (376 MHz, Chloroform-*d*)  $\delta$  -73.9; HRMS (ESI) *m/z* 550.1866 (M+H<sup>+</sup>), calc. for C<sub>28</sub>H<sub>31</sub>F<sub>3</sub>NO<sub>5</sub>S<sup>+</sup> 550.1870.

The ee was determined by HPLC analysis: CHIRALPAK IG (x 2) (4.6 mm i.d. x 250 mm); Hexane/2-propanol = 97/3; flow rate: 1.0 mL/min; 25 °C; 210 nm; retention time: 11.4 min (major) and 13.0 min (minor).

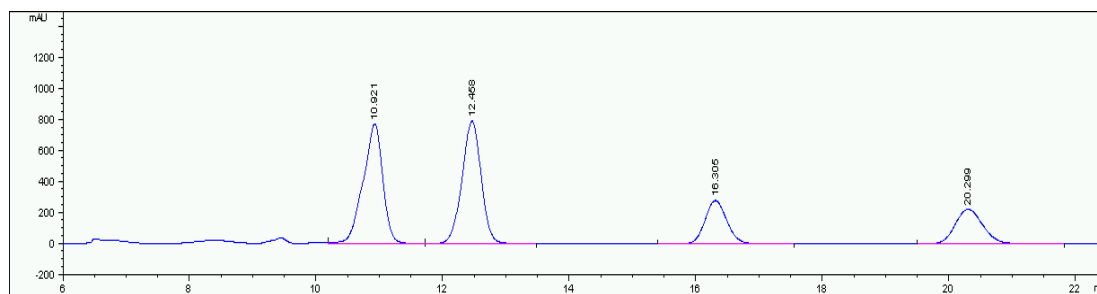

| Entry | Retention Time | Area    | Height | %Area  |
|-------|----------------|---------|--------|--------|
| 1     | 10.921         | 16915.8 | 772.7  | 35.634 |
| 2     | 12.458         | 16742   | 792.3  | 35.268 |
| 3     | 16.305         | 6866.8  | 281.4  | 14.465 |
| 4     | 20.299         | 6946.6  | 224.3  | 14.633 |

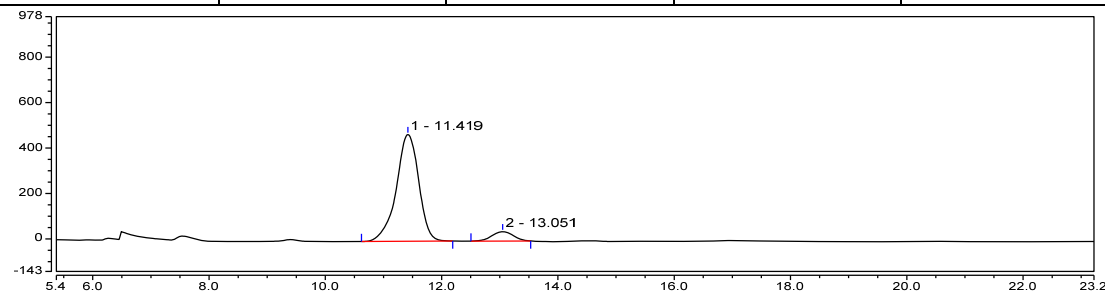

| Entry | Retention Time | Area     | Height | %Area |
|-------|----------------|----------|--------|-------|
| 1     | 11.419         | 210.1115 | 469.58 | 92.23 |
| 2     | 13.051         | 17.6986  | 40.99  | 7.77  |

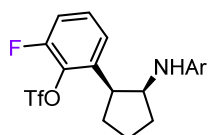

Ar = 2-OCH<sub>2</sub>-(2,6-Me<sub>2</sub>-Ph)-5-OMePh

**11b**: yellow oil; 42.5 mg, 75% yield; 83% ee; dr > 19:1; [ $\alpha$ ]<sub>D</sub><sup>22</sup> –26.8 (*c* 1.0, CHCl<sub>3</sub>); <sup>1</sup>H NMR (300 MHz, Chloroform-*d*)  $\delta$  7.22 (dd, *J* = 8.2, 6.7 Hz, 1H), 7.10 (d, *J* = 7.5 Hz, 2H), 6.96 – 6.85 (m, 2H), 6.81 – 6.72 (m, 1H), 6.70 (d, *J* = 8.5 Hz, 1H), 6.15 – 6.02 (m, 2H), 4.84 (s, 2H), 4.06 – 3.99 (m, 1H), 3.94 (s, 1H), 3.71 (s, 3H), 3.64 – 3.54 (m, 1H), 2.28 (s, 6H), 2.24 – 2.16 (m, 1H), 2.09 – 2.01 (m, 1H), 2.00 – 1.86 (m, 2H), 1.84 – 1.69 (m, 2H); <sup>13</sup>C NMR (75 MHz, CDCl<sub>3</sub>)  $\delta$  154.8, 153.5 (d, *J* = 252.4 Hz), 140.6, 138.5, 138.2, 136.7 (d, *J* = 0.9 Hz), 135.3 (d, *J* = 13.4 Hz), 133.4, 128.4 (d, *J* = 7.9 Hz), 128.3, 128.1, 124.4 (d, *J* = 3.4 Hz), 118.5 (q, *J* = 320.5 Hz), 115.2 (d, *J* = 18.7 Hz), 111.4, 99.0, 97.9, 65.5, 55.9, 55.4, 42.9 (d, *J* = 1.8 Hz), 33.6, 30.1, 22.7, 19.5; <sup>19</sup>F NMR (376 MHz, Chloroform-*d*)  $\delta$  –73.0, –126.3; HRMS (ESI) *m/z* 568.1771 (M+H<sup>+</sup>), calc. for C<sub>28</sub>H<sub>30</sub>F<sub>4</sub>NO<sub>5</sub>S<sup>+</sup> 568.1775.

The ee was determined by HPLC analysis: CHIRALPAK IG (x 2) (4.6 mm i.d. x 250 mm); Hexane/2-propanol = 98/2; flow rate: 1.0 mL/min; 25 °C; 210 nm; retention time: 12.1 min (major) and 13.2 min (minor).

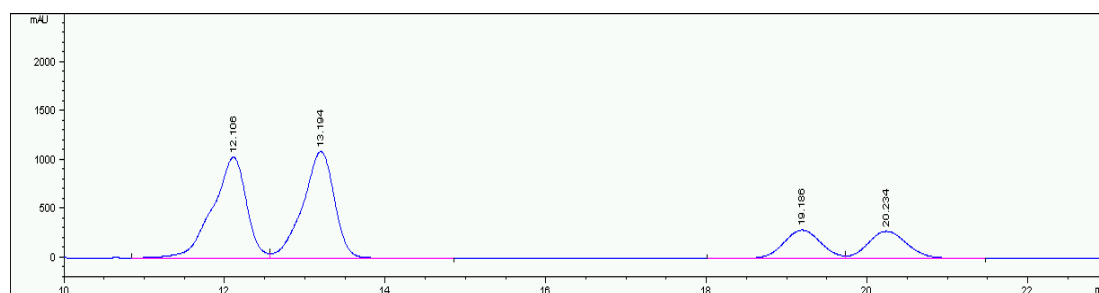

| Entry | Retention Time | Area    | Height | %Area  |
|-------|----------------|---------|--------|--------|
| 1     | 12.106         | 30622.1 | 1037.1 | 38.388 |
| 2     | 13.194         | 30258.5 | 1096.7 | 37.932 |
| 3     | 19.186         | 9452.6  | 291.9  | 11.850 |
| 4     | 20.234         | 9437.8  | 279.8  | 11.831 |

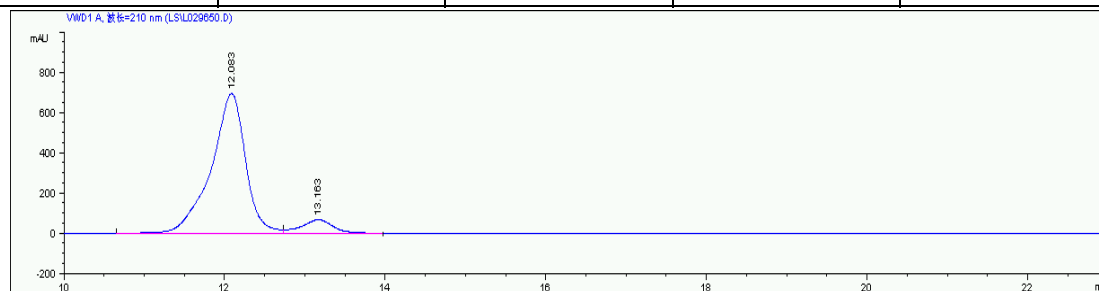

| Entry | Retention Time | Area    | Height | %Area  |
|-------|----------------|---------|--------|--------|
| 1     | 12.083         | 20795.2 | 696.1  | 91.443 |
| 2     | 13.163         | 1945.9  | 68.6   | 8.557  |

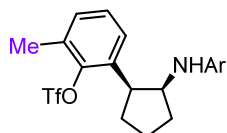

Ar = 2-OCH<sub>2</sub>-(2,6-Me<sub>2</sub>-Ph)-5-OMePh

**11c**: yellow oil; 41.1 mg, 73% yield; 83% ee; dr > 19:1; [ $\alpha$ ]<sub>D</sub><sup>22</sup> -23.5 (*c* 1.0, CHCl<sub>3</sub>); <sup>1</sup>H NMR (300 MHz, Chloroform-*d*)  $\delta$  7.24 – 7.18 (m, 1H), 7.09 (d, *J* = 7.6 Hz, 2H), 7.06 – 7.01 (m, 1H), 6.96 – 6.90 (m, 1H), 6.76 – 6.66 (m, 2H), 6.10 (d, *J* = 7.4 Hz, 2H), 4.83 (d, *J* = 1.7 Hz, 2H), 4.00 – 3.93 (m, 1H), 3.71 (s, 3H), 3.68 – 3.58 (m, 1H), 2.28 (d, *J* = 6.3 Hz, 9H), 2.16 (dt, *J* = 9.0, 5.2 Hz, 1H), 2.07 – 1.98 (m, 2H), 1.93 – 1.72 (m, 3H); <sup>13</sup>C NMR (75 MHz, CDCl<sub>3</sub>)  $\delta$  154.8, 146.3, 141.0, 138.1, 133.9, 133.3, 131.4, 130.6, 128.3, 128.1, 127.7, 127.2, 118.6 (q, *J* = 319.9 Hz), 111.4, 99.4, 98.6, 65.6, 56.2, 55.4, 43.0, 33.2, 30.0, 22.7, 19.5, 17.3; <sup>19</sup>F NMR (376 MHz, Chloroform-*d*)  $\delta$  -73.4; HRMS (ESI) *m/z* 564.2023 (M+H<sup>+</sup>), calc. for C<sub>29</sub>H<sub>33</sub>F<sub>3</sub>NO<sub>5</sub>S<sup>+</sup> 564.2026.

The ee was determined by HPLC analysis: CHIRALPAK IG (x 2) (4.6 mm i.d. x 250 mm); Hexane/2-propanol = 95/5; flow rate: 1.0 mL/min; 25 °C; 210 nm; retention time: 9.2 min (major) and 10.5 min (minor).

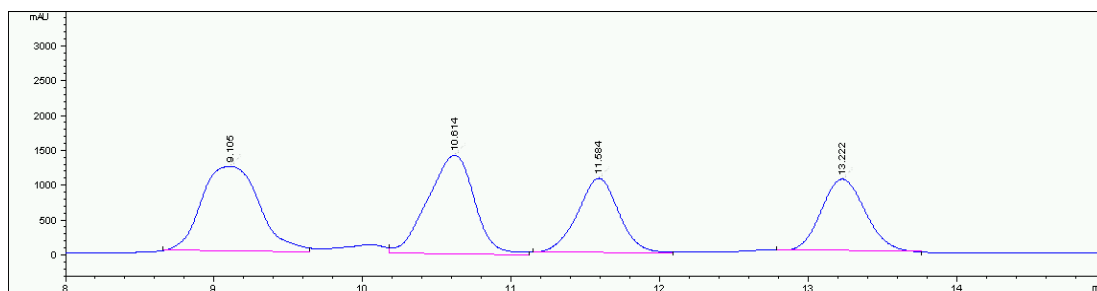

| Entry | Retention Time | Area    | Height | %Area  |
|-------|----------------|---------|--------|--------|
| 1     | 9.105          | 32824.8 | 1219.4 | 31.046 |
| 2     | 10.614         | 30914.3 | 1417.6 | 29.239 |
| 3     | 11.584         | 21120.2 | 1074.7 | 19.976 |
| 4     | 13.222         | 20870.6 | 1026.4 | 19.740 |

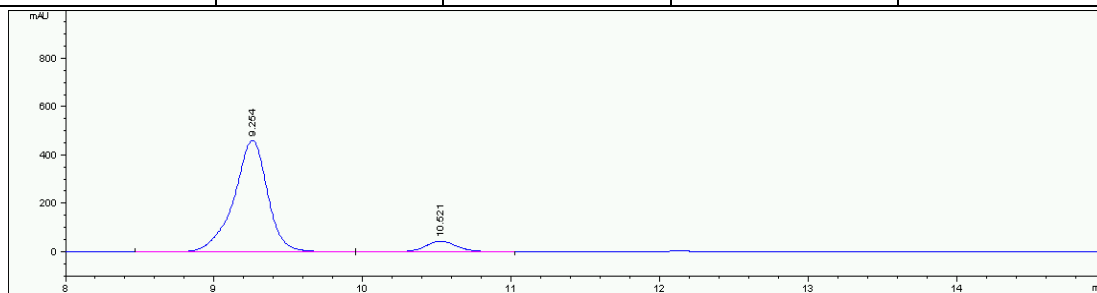

| Entry | Retention Time | Area   | Height | %Area  |
|-------|----------------|--------|--------|--------|
| 1     | 9.254          | 7385.3 | 463.2  | 90.881 |
| 2     | 10.521         | 741.1  | 46     | 9.119  |

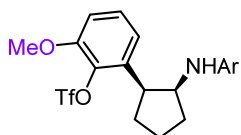

Ar = 2-OCH<sub>2</sub>-(2,6-Me<sub>2</sub>-Ph)-5-OMePh

**11d**: yellow oil; 37.0 mg, 64% yield; 80% ee; dr > 19:1; [ $\alpha$ ]<sub>D</sub><sup>22</sup> -49.2 (*c* 1.0, CHCl<sub>3</sub>); <sup>1</sup>H NMR (300 MHz, Chloroform-*d*)  $\delta$  7.30 – 7.22 (m, 1H), 7.14 (d, *J* = 7.5 Hz, 2H), 6.82 – 6.68 (m, 4H), 6.11 (d, *J* = 7.3 Hz, 2H), 4.87 (s, 2H), 4.11 – 3.96 (m, 2H), 3.85 (s, 3H), 3.75 (s, 3H), 3.60 (q, *J* = 8.5 Hz, 1H), 2.32 (s, 6H), 2.21 (d, *J* = 8.8 Hz, 1H), 2.09 – 1.98 (m, 2H), 1.96 – 1.67 (m, 3H); <sup>13</sup>C NMR (75 MHz, CDCl<sub>3</sub>)  $\delta$  154.8, 150.8, 140.7, 138.8, 138.2, 137.5, 134.7, 133.5, 128.2, 128.1, 128.0, 120.4, 118.7 (q, *J* = 320.6 Hz), 111.5, 111.1, 98.7, 97.6, 65.5, 55.9, 55.7, 55.4, 43.0, 33.4, 29.5, 22.6, 19.6; <sup>19</sup>F NMR (376 MHz, Chloroform-*d*)  $\delta$  -72.8; HRMS (ESI) *m/z* 580.1981 (M+H<sup>+</sup>), calc. for C<sub>29</sub>H<sub>33</sub>F<sub>3</sub>NO<sub>6</sub>S<sup>+</sup> 580.1975.

The ee was determined by HPLC analysis: CHIRAL INB (x 2) (4.6 mm i.d. x 250 mm); Hexane/2-propanol = 95/5; flow rate: 1.0 mL/min; 25 °C; 210 nm; retention time: 17.0 min (major) and 20.8 min (minor).

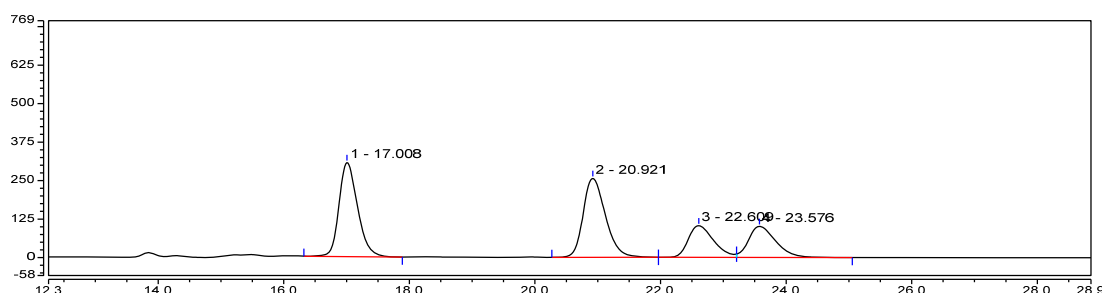

| Entry | Retention Time | Area     | Height | %Area |
|-------|----------------|----------|--------|-------|
| 1     | 17.008         | 105.3286 | 305.67 | 34.00 |
| 2     | 20.921         | 105.6075 | 256.68 | 34.09 |
| 3     | 22.609         | 48.1638  | 102.92 | 15.55 |
| 4     | 23.576         | 50.6478  | 101.07 | 16.35 |

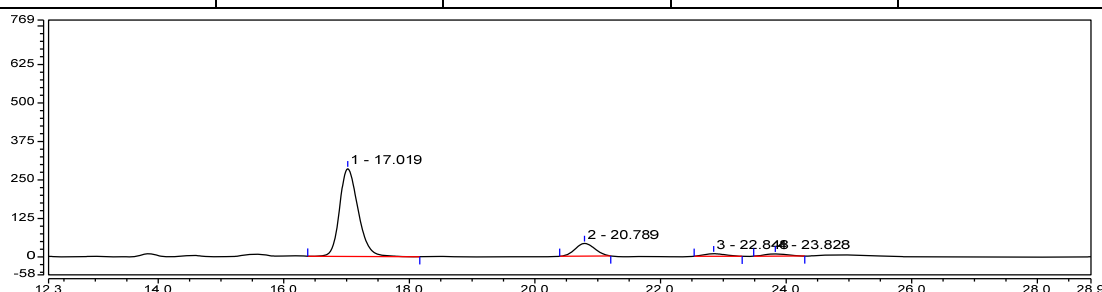

| Entry | Retention Time | Area    | Height | %Area |
|-------|----------------|---------|--------|-------|
| 1     | 17.019         | 97.4785 | 284.54 | 82.17 |
| 2     | 20.789         | 15.0304 | 41.18  | 12.67 |
| 3     | 22.848         | 3.2060  | 8.14   | 2.70  |
| 4     | 23.828         | 2.9205  | 7.43   | 2.46  |



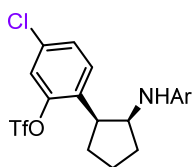

Ar = 2-OCH<sub>2</sub>-(2,6-Me<sub>2</sub>-Ph)-5-OMePh

**11e**: yellow oil; 40.8 mg, 72% yield; 83% ee; dr > 19:1; [ $\alpha$ ]<sub>D</sub><sup>22</sup> -29.5 (*c* 1.0, CHCl<sub>3</sub>); <sup>1</sup>H NMR (300 MHz, Chloroform-*d*)  $\delta$  7.35 – 7.27 (m, 1H), 7.22 – 7.09 (m, 4H), 6.88 (dd, *J* = 8.4, 2.1 Hz, 1H), 6.76 (d, *J* = 8.5 Hz, 1H), 6.22 – 6.00 (m, 2H), 4.92 (s, 2H), 4.00 (d, *J* = 23.3 Hz, 2H), 3.77 (s, 3H), 3.56 (q, *J* = 7.6, 7.1 Hz, 1H), 2.33 (s, 6H), 2.28 – 2.19 (m, 1H), 2.10 – 1.75 (m, 5H). <sup>13</sup>C NMR (75 MHz, CDCl<sub>3</sub>)  $\delta$  154.9, 147.8, 140.8, 138.5, 138.1, 133.3, 133.0, 132.4, 130.4, 128.4, 128.2, 121.5, 118.5 (q, *J* = 320.2 Hz), 111.4, 99.0, 98.0, 65.6, 55.8, 55.5, 42.6, 33.4, 29.7, 22.5, 19.4; <sup>19</sup>F NMR (376 MHz, Chloroform-*d*)  $\delta$  -73.7; HRMS (ESI) *m/z* 586.1772 (M+H<sup>+</sup>), calc. for C<sub>28</sub>H<sub>30</sub>ClF<sub>3</sub>NO<sub>5</sub>S<sup>+</sup> 586.1775.

The ee was determined by HPLC analysis: CHIRALCEL OD-H (x 2) (4.6 mm i.d. x 250 mm); Hexane/2-propanol = 98/2; flow rate: 1.0 mL/min; 25 °C; 210 nm; retention time: 11.0 min (minor) and 11.6 min (major).

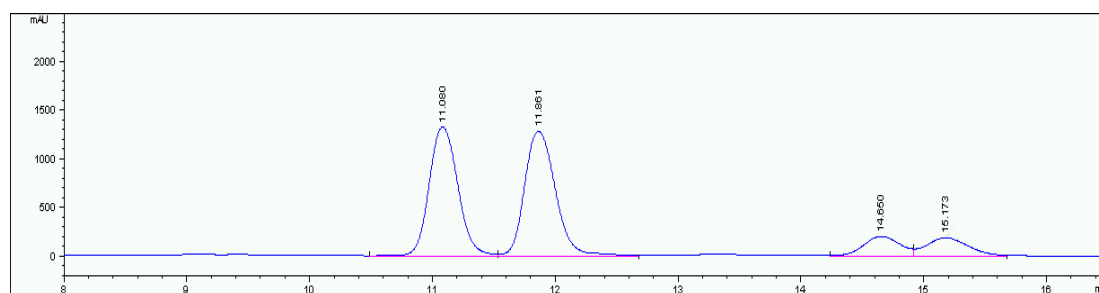

| Entry | Retention Time | Area    | Height | %Area  |
|-------|----------------|---------|--------|--------|
| 1     | 11.08          | 21971.1 | 1332.2 | 40.904 |
| 2     | 11.861         | 22690.9 | 1287.5 | 42.244 |
| 3     | 14.65          | 4426    | 207.1  | 8.240  |
| 4     | 15.173         | 4625.6  | 192.7  | 8.612  |

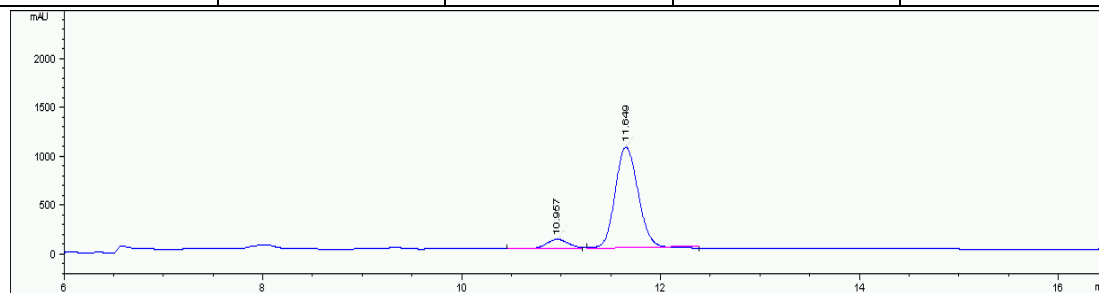

| Entry | Retention Time | Area    | Height | %Area  |
|-------|----------------|---------|--------|--------|
| 1     | 10.957         | 1830.5  | 103.4  | 9.858  |
| 2     | 11.649         | 16737.3 | 1036   | 90.142 |

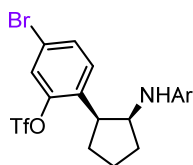

Ar = 2-OCH<sub>2</sub>-(2,6-Me<sub>2</sub>-Ph)-5-OMePh

**11f**: yellow oil; 46.4 mg, 74% yield; 85% ee; dr > 19:1; [ $\alpha$ ]<sub>D</sub><sup>22</sup> -56.5 (*c* 1.0, CHCl<sub>3</sub>); <sup>1</sup>H NMR (300 MHz, Chloroform-*d*)  $\delta$  7.35 – 7.25(m, 2H), 7.19 (d, *J* = 7.5 Hz, 2H), 7.10 – 6.99 (m, 2H), 6.76 (d, *J* = 8.5 Hz, 1H), 6.24 – 6.06 (m, 2H), 4.92 (s, 2H), 4.09 – 4.07 (m, 1H), 3.97 (s, 1H), 3.76 (s, 3H), 3.55 (dt, *J* = 10.1, 7.0 Hz, 1H), 2.34 (s, 6H), 2.27 – 2.15 (m, 1H), 2.08 – 1.72 (m, 5H); <sup>13</sup>C NMR (75 MHz, Chloroform-*d*)  $\delta$  154.8, 147.8, 140.8, 138.4, 138.1, 133.3, 132.9, 131.1, 130.7, 128.4, 128.2, 124.3, 120.4, 118.5 (q, *J* = 320.3 Hz), 111.4, 99.0, 98.0, 65.6, 55.8, 55.5, 42.7, 33.3, 29.6, 22.4, 19.4; <sup>19</sup>F NMR (376 MHz, Chloroform-*d*)  $\delta$  -73.7; HRMS (ESI) *m/z* 628.0970 (M+H<sup>+</sup>), calc. for C<sub>28</sub>H<sub>30</sub>BrF<sub>3</sub>NO<sub>5</sub>S<sup>+</sup> 628.0975.

The ee was determined by HPLC analysis: CHIRALCEL OD-H (x 2) (4.6 mm i.d. x 250 mm); Hexane/2-propanol = 97/3; flow rate: 1.0 mL/min; 25 °C; 210 nm; retention time: 15.6min (minor) and 16.7 min (major).

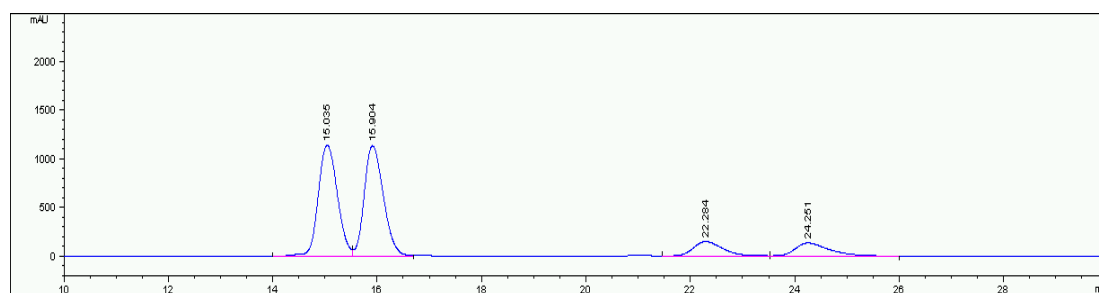

| Entry | Retention Time | Area    | Height | %Area  |
|-------|----------------|---------|--------|--------|
| 1     | 15.035         | 29400.1 | 1144   | 40.831 |
| 2     | 15.904         | 29266.4 | 1140.4 | 40.645 |
| 3     | 22.284         | 6521.2  | 154.3  | 9.057  |
| 4     | 24.251         | 6817.5  | 139.5  | 9.468  |

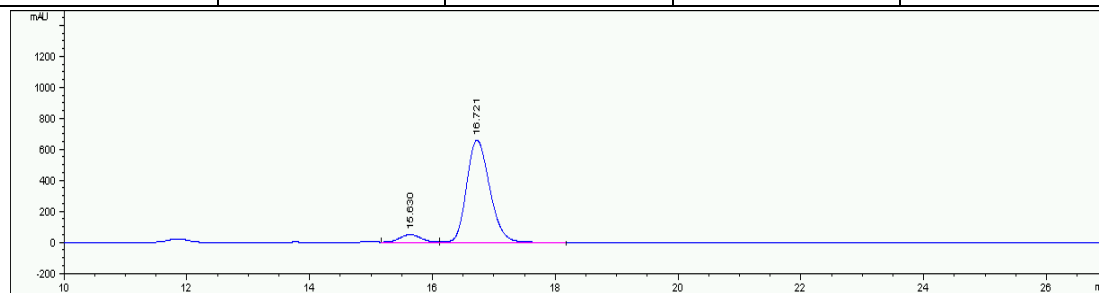

| Entry | Retention Time | Area    | Height | %Area  |
|-------|----------------|---------|--------|--------|
| 1     | 15.63          | 1392.7  | 53.4   | 7.367  |
| 2     | 16.721         | 17512.7 | 663.2  | 92.633 |

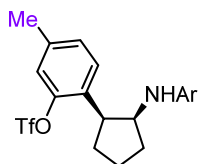

**11g**: yellow oil; 38.3 mg, 68% yield; 84% ee; dr > 19:1;  $[\alpha]_D^{22}$   $-7.8$  ( $c$  1.0,  $\text{CHCl}_3$ );  $^1\text{H}$  NMR (300 MHz,  $\text{Chloroform-}d$ )  $\delta$  7.22 (dd,  $J = 8.3, 6.8$  Hz, 1H), 7.10 (d,  $J = 7.5$  Hz, 2H), 7.02

Ar = 2-OCH<sub>2</sub>-(2,6-Me<sub>2</sub>-Ph)-5-OMePh (d,  $J = 8.0$  Hz, 1H), 6.96 – 6.90 (m, 1H), 6.72 – 6.62 (m, 2H), 6.13 – 6.03 (m 2H), 4.84 (s, 2H), 4.03 – 3.87 (m, 2H), 3.71 (s, 3H), 3.51 (q,  $J = 8.3$  Hz, 1H), 2.32– 3.22 (m, 9H), 2.16 (d,  $J = 7.1$  Hz, 1H), 2.03 – 1.93 (m, 2H), 1.90 – 1.67 (m, 3H);  $^{13}\text{C}$  NMR (75 MHz,  $\text{CDCl}_3$ )  $\delta$  154.8, 147.9, 141.0, 138.4, 138.1, 133.3, 129.8, 129.3, 128.8, 128.3, 128.1, 121.6, 118.5 (q,  $J = 320.1$  Hz), 111.6, 98.7, 65.6, 56.3, 55.5, 42.65, 32.9, 29.4, 22.5, 20.8, 19.4;  $^{19}\text{F}$  NMR (376 MHz,  $\text{Chloroform-}d$ )  $\delta$   $-74.0$ ; HRMS (ESI)  $m/z$  564.2023 ( $\text{M}+\text{H}^+$ ), calc. for  $\text{C}_{29}\text{H}_{33}\text{F}_3\text{NO}_5\text{S}^+$  564.2026.

The ee was determined by HPLC analysis: CHIRAL INB (x 2) (4.6 mm i.d. x 250 mm); Hexane/2-propanol = 97/3; flow rate: 1.0 mL/min; 25 °C; 210 nm; retention time: 14.2 min (minor) and 14.9 min (major).

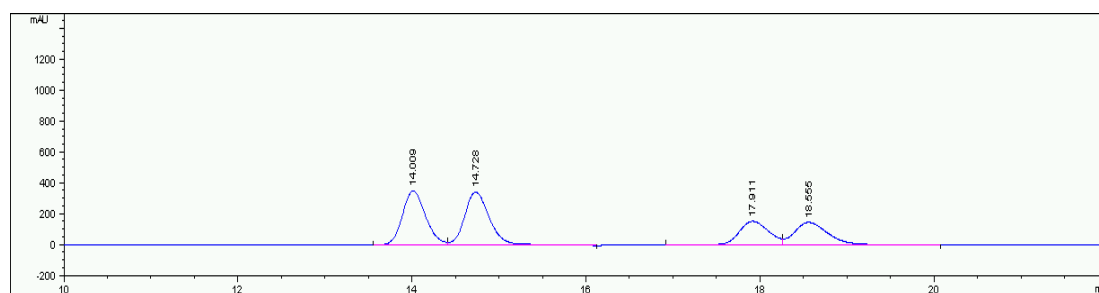

| Entry | Retention Time | Area   | Height | %Area  |
|-------|----------------|--------|--------|--------|
| 1     | 14.009         | 6671.4 | 353.6  | 30.516 |
| 2     | 14.728         | 7061.7 | 346.7  | 32.302 |
| 3     | 17.911         | 3896.7 | 156.1  | 17.824 |
| 4     | 18.555         | 4232   | 149.2  | 19.358 |

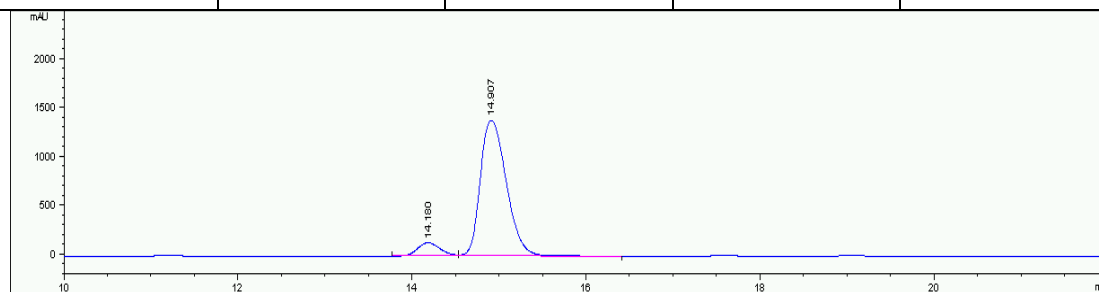

| Entry | Retention Time | Area    | Height | %Area  |
|-------|----------------|---------|--------|--------|
| 1     | 14.18          | 2624.4  | 139.8  | 8.207  |
| 2     | 14.907         | 29352.7 | 1394.3 | 91.793 |

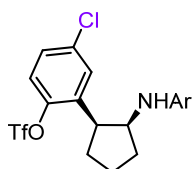

**11h**: yellow oil; 38.9 mg, 66% yield; 75% ee; dr > 19:1;  $[\alpha]_D^{22}$  -28.8 (*c* 1.0, CHCl<sub>3</sub>); <sup>1</sup>H NMR (300 MHz, Chloroform-*d*) δ 7.30 (d, *J* = 2.7 Hz, 1H), 7.25 – 7.20 (m, 1H), 7.16 – 7.08 (m, 3H), 7.03 (d, *J* = 8.8 Hz, 1H), 6.74 (d, *J* = 8.5 Hz, 1H), 6.17 – 6.02 (m, 2H), 4.92 (s, 2H), 4.14 (s, 1H), 3.98 (s, 1H), 3.73 (s, 3H), 3.57 (dt, *J* = 9.6, 7.0 Hz, 1H), 2.35 (s, 6H), 2.31 – 2.21 (m, 1H), 2.16 – 2.07 (m, 1H), 2.00 – 1.87 (m, 2H), 1.82 – 1.68 (m, 2H); <sup>13</sup>C NMR (75 MHz, CDCl<sub>3</sub>) δ 154.9, 146.4, 140.5, 138.6, 138.1, 136.1, 133.7, 133.3, 130.1, 128.4, 128.2, 127.9, 122.0, 118.5 (q, *J* = 320.2 Hz), 112.2, 99.4, 97.9, 66.0, 56.0, 55.4, 42.7, 33.7, 30.2, 22.5, 19.5; <sup>19</sup>F NMR (376 MHz, Chloroform-*d*) δ -72.9; HRMS (ESI) *m/z* 590.0771 (M+H<sup>+</sup>), calc. for C<sub>28</sub>H<sub>30</sub>ClF<sub>3</sub>NO<sub>5</sub>S<sup>+</sup> 590.0777.

The ee was determined by HPLC analysis: CHIRAL MD (x 2) (4.6 mm i.d. x 250 mm); Hexane/2-propanol = 98/2; flow rate: 1.0 mL/min; 25 °C; 210 nm; retention time: 7.5 min (major) and 8.6 min (minor).

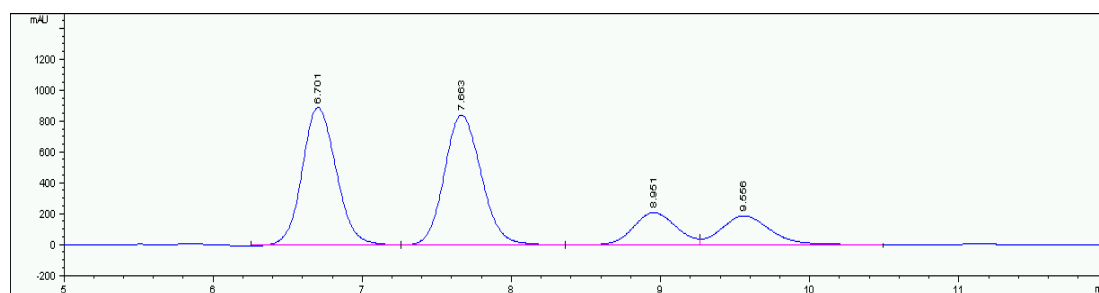

| Entry | Retention Time | Area    | Height | %Area  |
|-------|----------------|---------|--------|--------|
| 1     | 6.701          | 14299   | 894.6  | 37.430 |
| 2     | 7.663          | 14769.6 | 847.3  | 38.662 |
| 3     | 8.951          | 4439.7  | 213.8  | 11.622 |
| 4     | 9.556          | 4693.3  | 193.6  | 12.286 |

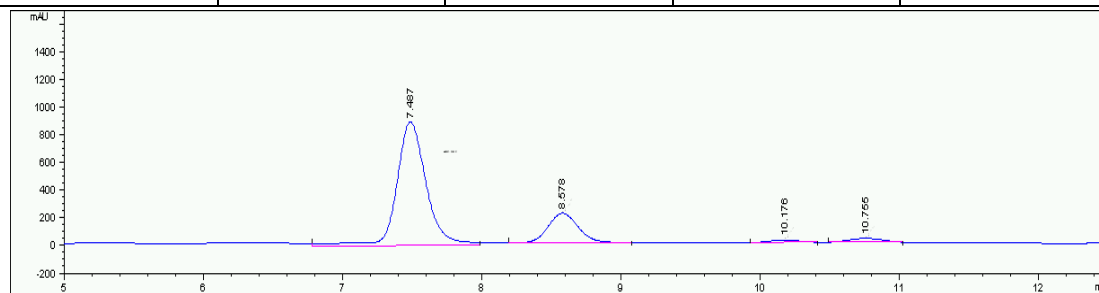

| Entry | Retention Time | Area    | Height | %Area  |
|-------|----------------|---------|--------|--------|
| 1     | 7.487          | 13465.1 | 895.9  | 77.646 |
| 2     | 8.578          | 3214.9  | 214    | 18.539 |
| 3     | 10.176         | 242.4   | 16.2   | 1.398  |
| 4     | 10.755         | 419.1   | 26.5   | 2.417  |

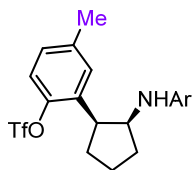

Ar = 2-OCH<sub>2</sub>-(2,6-Me<sub>2</sub>-Ph)-5-OMePh

**11i**: yellow oil; 37.7 mg, 67% yield; 83% ee; dr > 19:1; [ $\alpha$ ]<sub>D</sub><sup>22</sup> +4.3 (*c* 1.0, CHCl<sub>3</sub>); <sup>1</sup>H NMR (300 MHz, Chloroform-*d*)  $\delta$  7.21 – 7.16 (m, 1H), 7.10 – 7.04 (m, 3H), 6.96 – 6.85 (m, 2H), 6.71 (d, *J* = 8.6 Hz, 1H), 6.23 – 6.07 (m, 2H), 4.83 (s, 2H), 4.06 – 3.98 (m, 1H), 3.73 – 3.68 (m, 3H), 3.58 – 3.49 (m, 1H), 2.25 (d, *J* = 2.0 Hz, 6H), 2.22 – 2.16 (m, 1H), 2.04 (s, 5H), 1.97 – 1.89 (m, 1H), 1.86 – 1.71 (m, 2H); <sup>13</sup>C NMR (75 MHz, CDCl<sub>3</sub>)  $\delta$  154.8, 146.2, 140.7, 138.7, 138.1, 138.1, 133.2, 133.0, 130.3, 128.5, 128.3, 128.2, 120.6, 111.6, 98.7, 97.9, 65.7, 55.6, 55.4, 42.7, 33.4, 29.6, 22.6, 20.8, 19.4; <sup>19</sup>F NMR (376 MHz, Chloroform-*d*)  $\delta$  –73.9; HRMS (ESI) *m/z* 564.2021 (M+H<sup>+</sup>), calc. for C<sub>29</sub>H<sub>33</sub>F<sub>3</sub>NO<sub>5</sub>S<sup>+</sup> 564.2026.

The ee was determined by HPLC analysis: CHIRALCEL OD-H (x 2) (4.6 mm i.d. x 250 mm); Hexane/2-propanol = 98/2; flow rate: 1.0 mL/min; 25 °C; 210 nm; retention time: 14.7 min (major) and 17.1 min (minor).

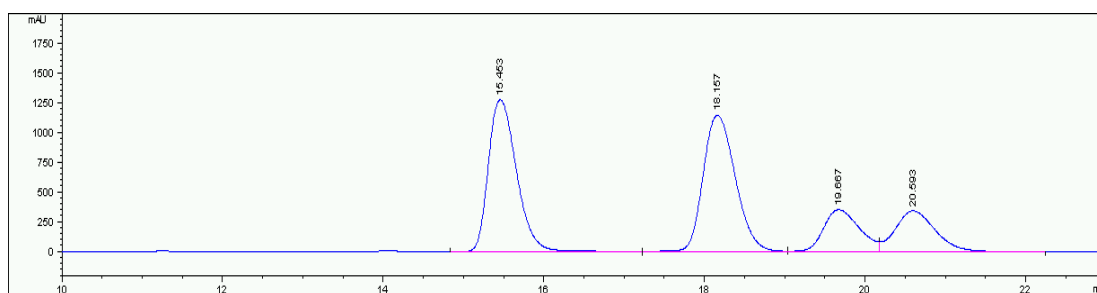

| Entry | Retention Time | Area    | Height | %Area  |
|-------|----------------|---------|--------|--------|
| 1     | 15.453         | 31637.8 | 1277.4 | 36.201 |
| 2     | 18.157         | 32292.1 | 1148.6 | 36.949 |
| 3     | 19.667         | 11203   | 355.7  | 12.819 |
| 4     | 20.593         | 12262.8 | 345.9  | 14.031 |

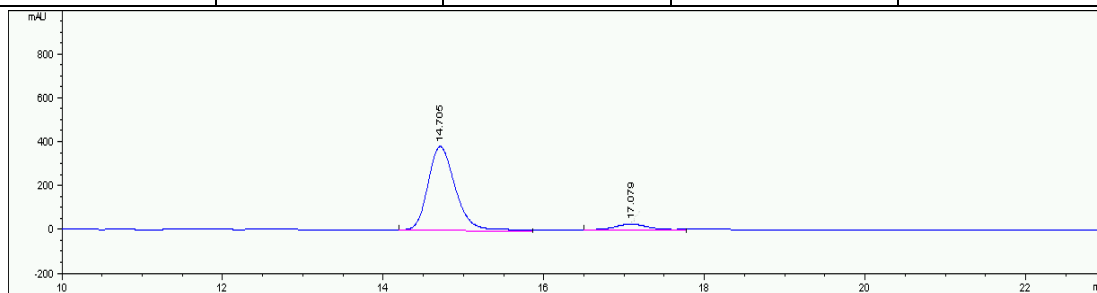

| Entry | Retention Time | Area   | Height | %Area  |
|-------|----------------|--------|--------|--------|
| 1     | 14.705         | 9396.1 | 386.2  | 91.335 |
| 2     | 17.079         | 891.4  | 28.6   | 8.665  |

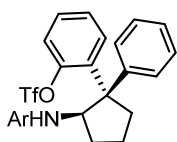

Ar = 2-OBn-5-OMePh

**13a**: white solid; Mp 80.6 - 81.8 °C; 37.6 mg, 63% yield; 92% ee; dr = 6:1;  $[\alpha]_D^{22}$  -16.3 (*c* 1.0, CHCl<sub>3</sub>); <sup>1</sup>H NMR (300 MHz, Chloroform-*d*) δ 7.63 (dd, *J* = 6.1, 3.5 Hz, 1H), 7.33 – 7.27 (m, 5H), 7.26 – 7.23 (m, 1H), 7.15 – 6.95 (m, 7H), 6.72 (d, *J* = 8.6 Hz, 1H), 6.41 (d, *J* = 2.8 Hz, 1H), 6.13 (dd, *J* = 8.7, 2.8 Hz, 1H), 4.89 – 4.73 (m, 2H), 4.33 – 4.19 (m, 1H), 4.08 (d, *J* = 10.1 Hz, 1H), 3.79 (d, *J* = 3.0 Hz, 3H), 3.20 – 3.07 (m, 1H), 2.35 – 2.23 (m, 1H), 2.15 – 1.98 (m, 2H), 1.93 – 1.82 (m, 1H), 1.32 – 1.20 (m, 1H); <sup>13</sup>C NMR (75 MHz, CDCl<sub>3</sub>) δ 155.1, 149.1, 141.4, 140.8, 140.8, 138.3, 136.8, 129.0, 128.3, 128.2, 128.1, 127.9, 127.8, 127.7, 127.5, 126.8, 120.6, δ 118.0 (q, *J* = 319.8 Hz), 111.8, 98.2, 97.8, 71.0, 58.2, 55.5, 54.1, 36.2, 28.0, 19.6; <sup>19</sup>F NMR (376 MHz, Chloroform-*d*) δ -74.4, -74.8; HRMS (ESI) *m/z* 598.1864 (M+H<sup>+</sup>), calc. for C<sub>32</sub>H<sub>31</sub>NO<sub>5</sub>S<sup>+</sup> 598.1870.

The ee was determined by HPLC analysis: CHIRALPAK IF (4.6 mm i.d. x 250 mm); Hexane/2-propanol = 98/2; flow rate: 1.0 mL/min; 25 °C; 210 nm; retention time: 7.1 min (major) and 7.7 min (minor).

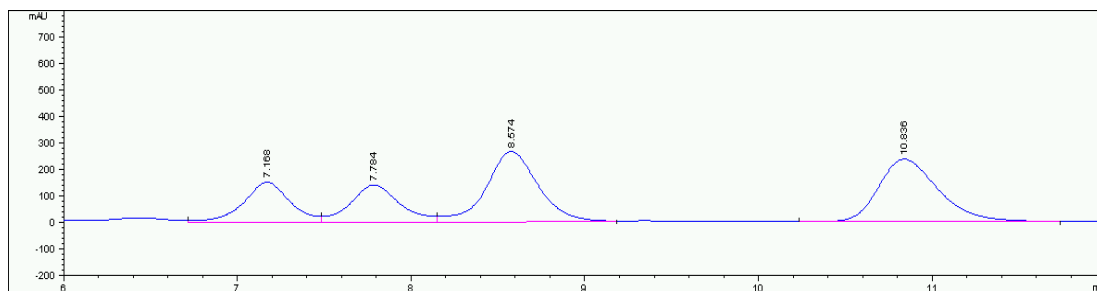

| Entry | Retention Time | Area   | Height | %Area  |
|-------|----------------|--------|--------|--------|
| 1     | 7.168          | 2849.1 | 152.2  | 16.791 |
| 2     | 7.784          | 2806.2 | 141.7  | 16.538 |
| 3     | 8.574          | 5653.7 | 267.7  | 33.319 |
| 4     | 10.836         | 5659.1 | 236    | 33.352 |

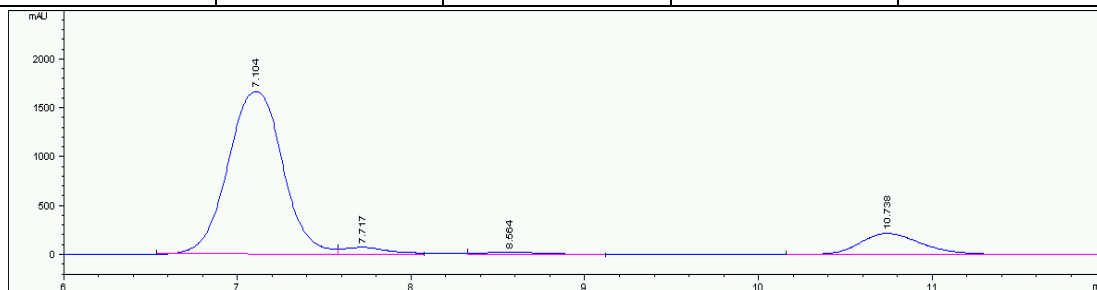

| Entry | Retention Time | Area    | Height | %Area  |
|-------|----------------|---------|--------|--------|
| 1     | 7.104          | 36407.2 | 1662.4 | 83.193 |
| 2     | 7.717          | 1443.5  | 75.6   | 3.299  |
| 3     | 8.564          | 585.5   | 21.2   | 1.338  |

|   |        |      |       |        |
|---|--------|------|-------|--------|
| 4 | 10.738 | 5326 | 215.1 | 12.170 |
|---|--------|------|-------|--------|

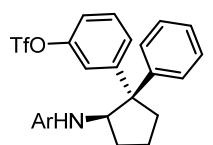

Ar = 2-OBn-5-OMePh

**13b**: yellow oil; 47.8 mg, 80% yield; 91% ee; dr = 3:1;  $[\alpha]_D^{22}$   $-39.0$  ( $c$  1.0,  $\text{CHCl}_3$ );  $^1\text{H NMR}$  (300 MHz,  $\text{Chloroform-}d$ )  $\delta$  7.54 – 7.41 (m, 7H), 7.39 – 7.28 (m, 4H), 7.26 – 7.05 (m, 3H), 6.89 (dd,  $J$  = 8.6, 2.2 Hz, 1H), 6.64 – 6.55 (m, 1H), 6.32 (dd,  $J$  = 8.7, 2.6 Hz, 1H), 5.07 – 4.90 (m, 2H), 4.65 – 4.43 (m, 1H), 4.34 – 4.13 (m, 1H), 3.96 (s, 3H), 3.01 – 2.77 (m, 1H), 2.56 – 2.37 (m, 2H), 2.20 – 2.06 (m, 1H), 2.03 – 1.88 (m, 1H), 1.65 – 1.57 (m, 1H);  $^{13}\text{C NMR}$  (75 MHz,  $\text{CDCl}_3$ )  $\delta$  155.1, 155.1, 151.9, 149.5, 149.4, 147.8, 147.3, 142.9, 140.8, 138.4, 137.0, 129.8, 129.5, 129.4, 128.6, 128.4, 128.3, 128.3, 128.2, 127.8, 127.7, 127.6, 127.5, 127.1, 127.0, 126.7, 126.3, 121.0, 120.5, 119.0, 118.8, 118.8 (q,  $J$  = 321.1 Hz), 112.0, 111.9, 98.3, 98.2, 98.2, 71.0, 58.6, 57.4, 57.1, 55.4, 37.7, 29.8, 29.4, 26.9, 19.8;  $^{19}\text{F NMR}$  (376 MHz,  $\text{CDCl}_3$ )  $\delta$   $-72.77$ ,  $-72.78$ ; HRMS (ESI)  $m/z$  598.1863 ( $\text{M}+\text{H}^+$ ), calc. for  $\text{C}_{32}\text{H}_{31}\text{NO}_5\text{S}^+$  598.1870.

The ee was determined by HPLC analysis: Lux Amylose-1 (4.6 mm i.d. x 250 mm); Hexane/2-propanol = 99/1; flow rate: 1.0 mL/min; 25 °C; 210 nm; retention time: 10.9 min (minor) and 11.9 min (major).

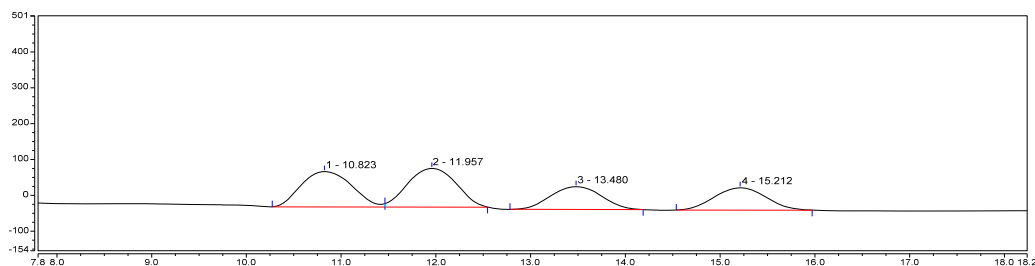

| Entry | Retention Time | Area    | Height | %Area |
|-------|----------------|---------|--------|-------|
| 1     | 10.823         | 60.8956 | 98.00  | 29.93 |
| 2     | 11.957         | 63.7310 | 107.33 | 31.32 |
| 3     | 13.480         | 39.5368 | 63.35  | 19.43 |
| 4     | 15.212         | 39.3250 | 61.93  | 19.33 |

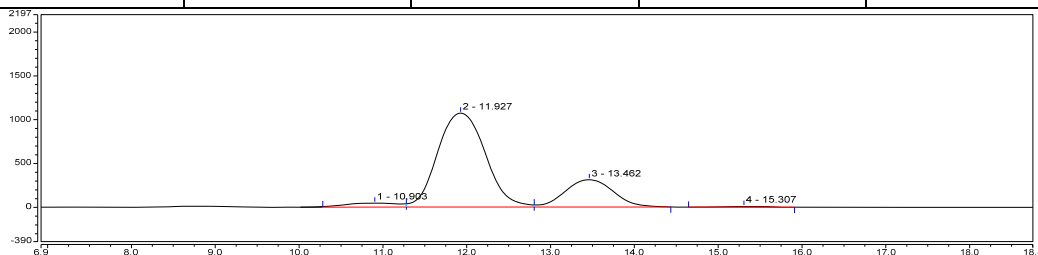

| Entry | Retention Time | Area     | Height  | %Area |
|-------|----------------|----------|---------|-------|
| 1     | 10.903         | 33.6268  | 45.39   | 3.53  |
| 2     | 11.927         | 705.2760 | 1070.66 | 74.08 |

|   |        |          |        |       |
|---|--------|----------|--------|-------|
| 3 | 13.462 | 208.0867 | 311.16 | 21.86 |
| 4 | 15.307 | 5.1017   | 8.68   | 0.54  |

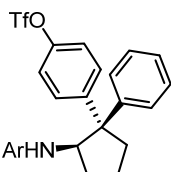

**13c:** white solid; Mp 66.5 - 67.8 °C; 49.0 mg, 82% yield; 97% ee; dr = 4:1;  $[\alpha]_D^{22}$  -32.8 (*c* 1.0, CHCl<sub>3</sub>); <sup>1</sup>H NMR (300 MHz, Chloroform-d) δ 7.50 – 7.45 (m, 3H), 7.44 – 7.40 (m, 1H), 7.39 – 7.34 (d, *J* = 1.8 Hz, 3H), 7.34 – 7.25 (m, 5H), 7.24 – 7.17 (m, 1H), 7.02 – 6.99 (m, 1H), 6.86 (d, *J* = 8.6 Hz, 1H), 6.53 (d, *J* = 2.7 Hz, 1H), 6.29 (dd, *J* = 8.6, 2.8 Hz, 1H), 5.00 – 4.87 (m, 2H), 4.58 – 4.41 (m, 1H), 4.34 – 4.10 (m, 1H), 3.93 (s, 3H), 2.96 – 2.77 (m, 1H), 2.49 – 2.34 (m, 2H), 2.16 – 2.02 (m, 1H), 2.00 – 1.88 (m, 1H), 1.60 – 1.48 (m, 1H); <sup>13</sup>C NMR (75 MHz, CDCl<sub>3</sub>) δ 155.2, 147.9, 147.8, 145.1, 140.9, 138.5, 137.0, 130.6, 128.5, 128.5, 128.1, 127.9, 127.2, 126.3, 120.7, 118.7 (q, *J* = 320.7 Hz), 111.8, 98.3, 98.1, 71.2, 58.5, 57.2, 55.6, 37.9, 29.8, 20.0; <sup>19</sup>F NMR (376 MHz, CDCl<sub>3</sub>) δ -72.9, -73.0; HRMS (ESI) *m/z* 598.1865 (M+H<sup>+</sup>), calc. for C<sub>32</sub>H<sub>31</sub>F<sub>3</sub>NO<sub>5</sub>S<sup>+</sup> 598.1870.

The ee was determined by HPLC analysis: CHIRALPAK IG (4.6 mm i.d. x 250 mm); Hexane/2-propanol = 95/5; flow rate: 1.0 mL/min; 25 °C; 210 nm; retention time: 6.8 min (major) and 7.4min (minor).

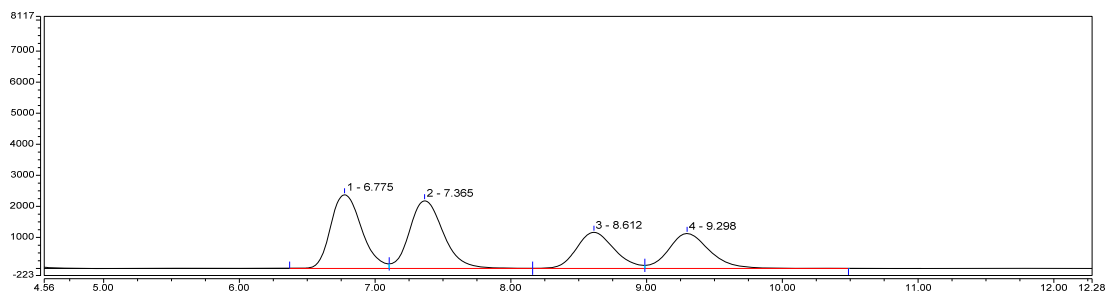

| Entry | Retention Time | Area     | Height  | %Area |
|-------|----------------|----------|---------|-------|
| 1     | 6.775          | 625.1848 | 2370.68 | 30.93 |
| 2     | 7.365          | 629.4244 | 2177.47 | 31.14 |
| 3     | 8.612          | 374.5081 | 1162.74 | 18.53 |
| 4     | 9.298          | 392.3369 | 1124.92 | 19.41 |

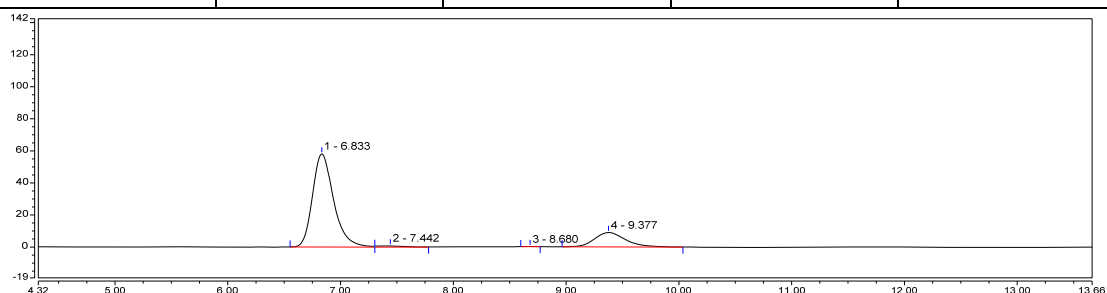

| Entry | Retention Time | Area    | Height | %Area |
|-------|----------------|---------|--------|-------|
| 1     | 6.833          | 12.5999 | 58.15  | 80.60 |



|   |       |        |      |       |
|---|-------|--------|------|-------|
| 2 | 7.442 | 0.1882 | 0.76 | 1.20  |
| 3 | 8.680 | 0.0070 | 0.07 | 0.04  |
| 4 | 9.377 | 2.8379 | 8.95 | 18.15 |

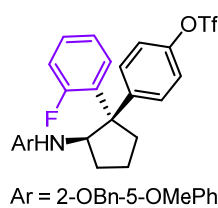

**13d**: white solid; Mp 66.8 - 68.9 °C; 53.5 mg, 87% yield; 93% ee; dr > 19:1;  $[\alpha]_D^{22}$  -82.7 (*c* 1.0, CHCl<sub>3</sub>); <sup>1</sup>H NMR (300 MHz, Chloroform-*d*) δ 7.43 (t, *J* = 7.7 Hz, 1H), 7.37 – 7.27 (m, 3H), 7.21 – 7.11 (m, 3H), 7.06 (d, *J* = 7.6 Hz, 3H), 6.92 – 6.76 (m, 3H), 6.70 (d, *J* = 8.1 Hz, 1H), 6.42 – 6.35 (m, 1H), 6.17 – 6.05 (m, 1H), 4.85 – 4.71 (m, 2H), 4.38 – 4.21 (m, 1H), 3.92 (d, *J* = 9.5 Hz, 1H), 3.76 (s, 3H), 3.04 – 2.89 (m, 1H), 2.35 – 2.21 (m, 1H), 2.17 – 2.03 (m, 1H), 2.03 – 1.88 (m, 1H), 1.85 – 1.71 (m, 1H), 1.27 – 1.14 (m, 1H); <sup>13</sup>C NMR (75 MHz, CDCl<sub>3</sub>) δ 161.0 (d, *J* = 248.3 Hz), 155.2, 148.0, 143.5, 141.0, 138.3, 136.9, 135.2 (d, *J* = 13.0 Hz), 129.7, 128.5, 128.2, 128.1, 127.4 (d, *J* = 4.6 Hz), 124.0 (d, *J* = 3.3 Hz), 120.7, 118.7 (q, *J* = 320.8 Hz), 116.2 (d, *J* = 22.4 Hz), 111.8, 98.3, 98.1, 71.3, 58.1, 55.6, 53.7, 36.2, 36.2, 28.7, 19.6; <sup>19</sup>F NMR (376 MHz, CDCl<sub>3</sub>) δ -73.0, -109.2; HRMS (ESI) *m/z* 616.1771 (M+H<sup>+</sup>), calc. for C<sub>32</sub>H<sub>30</sub>F<sub>4</sub>NO<sub>5</sub>S<sup>+</sup> 616.1775.

The ee was determined by HPLC analysis: CHIRALPAK IG (4.6 mm i.d. x 250 mm); Hexane/2-propanol = 90/10; flow rate: 1.0 mL/min; 25 °C; 210 nm; retention time: 7.0 min (minor) and 9.6 min (major).

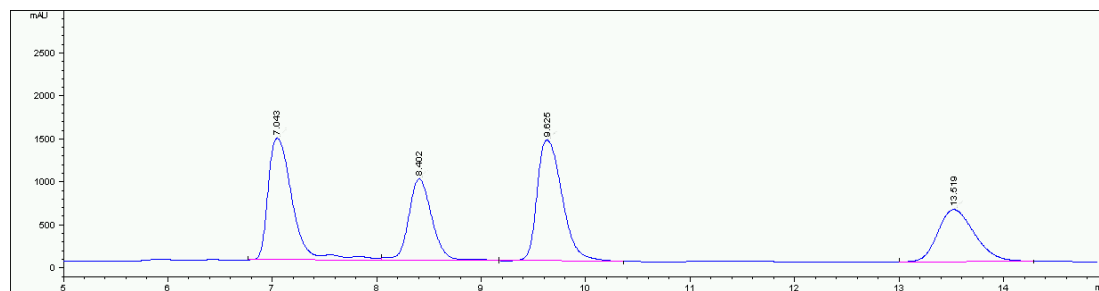

| Entry | Retention Time | Area    | Height | %Area  |
|-------|----------------|---------|--------|--------|
| 1     | 7.043          | 22946.1 | 1410   | 29.867 |
| 2     | 8.402          | 14953   | 948.8  | 19.463 |
| 3     | 9.625          | 23801.9 | 1411   | 30.980 |
| 4     | 13.519         | 15127.9 | 611.4  | 19.690 |

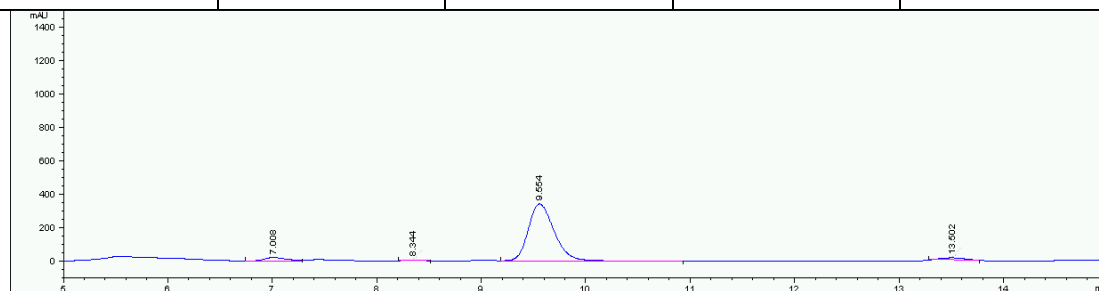

| Entry | Retention Time | Area   | Height | %Area  |
|-------|----------------|--------|--------|--------|
| 1     | 7.008          | 393.8  | 23.1   | 5.803  |
| 2     | 8.344          | 64.1   | 5.1    | 0.945  |
| 3     | 9.554          | 6080.7 | 343.9  | 89.607 |
| 4     | 13.502         | 247.4  | 14.5   | 3.646  |

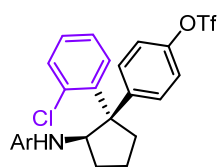

**13e**: yellow oil; 42.3 mg, 67% yield; 94% ee; dr > 19:1;  $[\alpha]_D^{22}$   $-30.0$  ( $c$  1.0,  $\text{CHCl}_3$ );  $^1\text{H NMR}$  (300 MHz, Chloroform- $d$ )  $\delta$  7.43 (d,  $J$  = 7.9 Hz, 1H), 7.29 (d,  $J$  = 6.8 Hz, 3H), 7.24 – 7.17 (m, 2H), 7.16 – 7.10 (m, 3H), 6.99 (d,  $J$  = 8.4 Hz, 2H), 6.78 (d,  $J$  = 8.4 Hz, 2H), 6.69 (d,  $J$  = 8.6 Hz, 1H), 6.39 (d,  $J$  = 2.7 Hz, 1H), 6.12 (dd,  $J$  = 8.6, 2.7 Hz, 1H), 4.84 – 4.67 (m, 2H), 4.28 (dd,  $J$  = 11.4, 6.3 Hz, 1H), 3.93 (s, 1H), 3.76 (s, 3H), 3.38 – 3.16 (m, 1H), 2.34 – 2.20 (m, 1H), 2.09 – 1.88 (m, 2H), 1.88 – 1.69 (m, 1H), 1.22 – 1.10 (m, 1H);  $^{13}\text{C NMR}$  (75 MHz,  $\text{CDCl}_3$ )  $\delta$  155.1, 147.9, 145.1, 143.2, 140.9, 138.0, 136.7, 134.6, 131.4, 129.8, 128.4, 128.2, 128.1, 128.1, 127.9, 126.7, 120.6, 118.6 (q,  $J$  = 320.7 Hz), 111.6, 98.3, 98.1, 71.2, 58.2, 56.2, 55.5, 35.6, 28.3, 19.4;  $^{19}\text{F NMR}$  (376 MHz,  $\text{CDCl}_3$ )  $\delta$   $-72.9$ ; HRMS (ESI)  $m/z$  632.1470 ( $\text{M}+\text{H}^+$ ), calc. for  $\text{C}_{32}\text{H}_{30}\text{ClF}_3\text{NO}_5\text{S}^+$  632.1480.

The ee was determined by HPLC analysis: CHIRAL MQ (x 2) (4.6 mm i.d. x 250 mm); Hexane/2-propanol = 98/2; flow rate: 1.0 mL/min; 25 °C; 210 nm; retention time: 6.3 min (major) and 7.2min (minor).

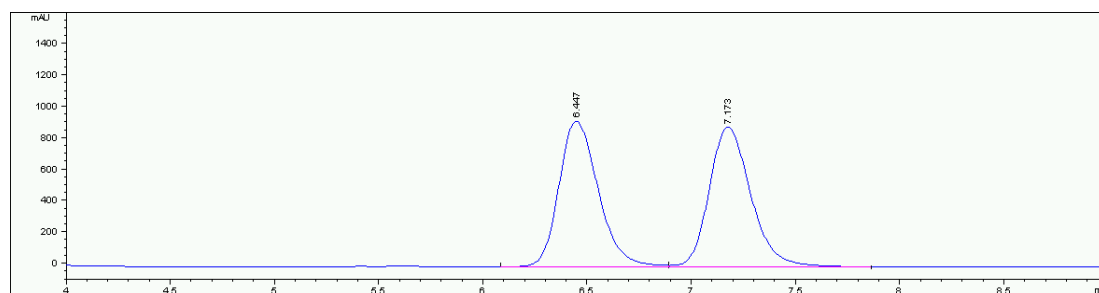

| Entry | Retention Time | Area    | Height | %Area  |
|-------|----------------|---------|--------|--------|
| 1     | 6.447          | 12288   | 930.1  | 49.696 |
| 2     | 7.173          | 12438.2 | 890.3  | 50.304 |

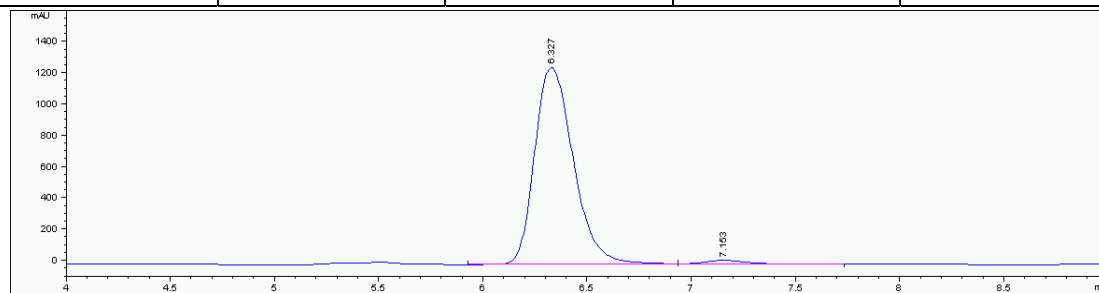

| Entry | Retention Time | Area    | Height | %Area  |
|-------|----------------|---------|--------|--------|
| 1     | 6.327          | 12288   | 930.1  | 49.696 |
| 2     | 7.193          | 12438.2 | 890.3  | 50.304 |

|   |       |         |      |        |
|---|-------|---------|------|--------|
| 1 | 6.327 | 16451.6 | 1261 | 96.963 |
| 2 | 7.153 | 515.3   | 28   | 3.037  |

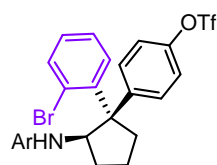

**13f**: white solid; Mp 75.4 - 77.5 °C; 47.9 mg, 71% yield; 94% ee; dr > 19:1;  $[\alpha]_D^{22}$  -13.0 (*c* 1.0, CHCl<sub>3</sub>); <sup>1</sup>H NMR (300 MHz, Chloroform-*d*) δ 7.43 (t, *J* = 6.7 Hz, 2H), 7.30 (d, *J* = 6.6 Hz, 3H), 7.22 (d, *J* = 7.9 Hz, 1H), 7.18 – 7.09 (m, 2H), 7.09 – 6.91 (m, 3H), 6.79 (d, *J* = 8.3 Hz, 2H), 6.70 (d, *J* = 8.5 Hz, 1H), 6.39 (d, *J* = 2.9 Hz, 1H), 6.12 (dd, *J* = 8.7, 2.9 Hz, 1H), 4.86 – 4.68 (m, 2H), 4.30 (dd, *J* = 11.6, 6.3 Hz, 1H), 3.93 (s, 1H), 3.77 (s, 3H), 3.50 – 3.30 (m, 1H), 2.37 – 2.21 (m, 1H), 2.11 – 1.91 (m, 2H), 1.87 – 1.71 (m, 1H), 1.26 – 1.14 (m, 1H); <sup>13</sup>C NMR (75 MHz, CDCl<sub>3</sub>) δ 155.2, 148.0, 146.7, 143.2, 141.0, 138.1, 136.8, 135.2, 130.2, 128.7, 128.5, 128.3, 128.2, 128.2, 127.4, 124.7, 120.6, 118.8 (q, *J* = 320.8 Hz), 111.7, 98.4, 98.2, 71.3, 58.4, 57.3, 55.6, 35.8, 28.4, 19.5; <sup>19</sup>F NMR (376 MHz, CDCl<sub>3</sub>) δ -72.8; HRMS (ESI) *m/z* 676.0966 (M+H<sup>+</sup>), calc. for C<sub>32</sub>H<sub>30</sub>BrF<sub>3</sub>NO<sub>5</sub>S<sup>+</sup> 676.0975.

The ee was determined by HPLC analysis: CHIRALCEL OD-H (4.6 mm i.d. x 250 mm); Hexane/2-propanol = 80/20; flow rate: 1.0 mL/min; 25 °C; 210 nm; retention time: 9.6 min (minor) and 15.5min (major).

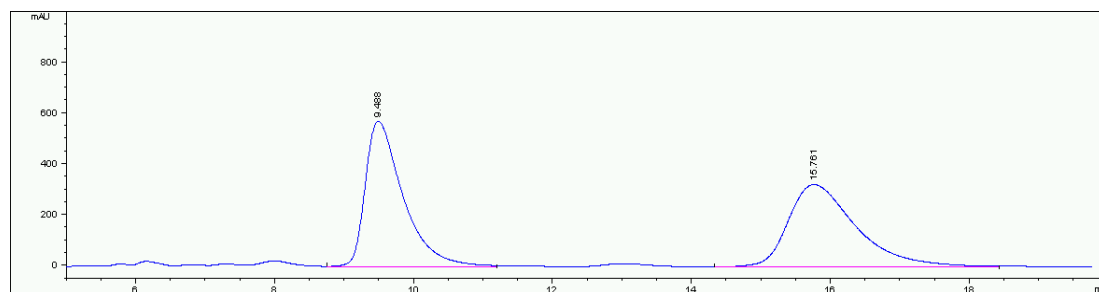

| Entry | Retention Time | Area    | Height | %Area  |
|-------|----------------|---------|--------|--------|
| 1     | 9.488          | 21906.7 | 573.5  | 49.724 |
| 2     | 15.761         | 22149.6 | 324.7  | 50.276 |

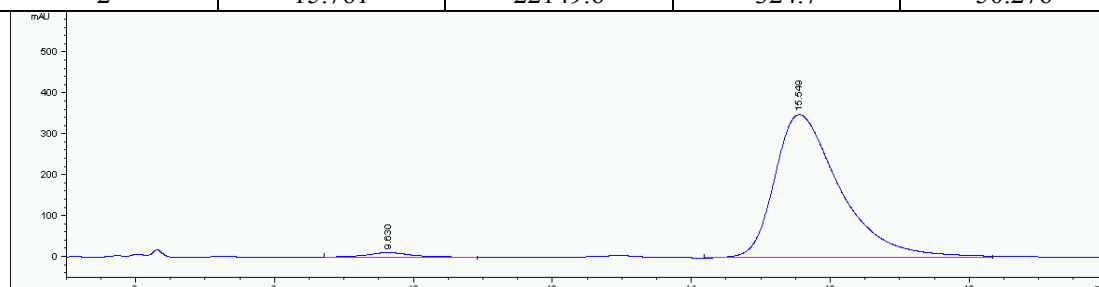

| Entry | Retention Time | Area    | Height | %Area  |
|-------|----------------|---------|--------|--------|
| 1     | 9.63           | 769.6   | 12.9   | 3.226  |
| 2     | 15.549         | 23084.4 | 350.5  | 96.774 |

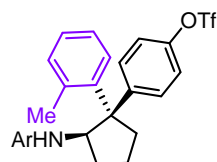

**13g**: white solid; Mp 104.4 - 105.8 °C; 45.8 mg, 75% yield; 94% ee; dr > 19:1;  $[\alpha]_D^{22}$   $-5.7$  ( $c$  1.0,  $\text{CHCl}_3$ );  $^1\text{H}$  NMR (300 MHz,  $\text{Chloroform-}d$ )  $\delta$  7.42 (dd,  $J = 5.7, 3.7$  Hz, 1H), 7.34 (d,  $J = 6.7$  Hz, 3H), 7.18 (td,  $J = 5.8, 2.6$  Hz, 4H), 7.12 – 6.96 (m, 3H), 6.81 (d,  $J = 8.4$  Hz, 2H), 6.74 (d,  $J = 8.5$  Hz, 1H), 6.46 (d,  $J = 2.8$  Hz, 1H), 6.24 – 6.10 (m, 1H), 4.87 – 4.74 (m, 2H), 4.38 (dd,  $J = 11.3, 6.3$  Hz, 1H), 4.06 (s, 1H), 3.82 (s, 3H), 3.00 (td,  $J = 9.4, 4.7$  Hz, 1H), 2.34 (dt,  $J = 13.7, 7.3$  Hz, 1H), 2.12 (td,  $J = 10.7, 9.1, 6.3$  Hz, 1H), 2.06 – 1.83 (m, 2H), 1.77 (s, 3H), 1.31 – 1.24 (m, 1H);  $^{13}\text{C}$  NMR (75 MHz,  $\text{CDCl}_3$ )  $\delta$  155.1, 147.9, 146.1, 144.3, 141.0, 138.0, 136.9, 136.8, 132.3, 129.9, 128.4, 128.1, 126.6, 126.3, 125.8, 120.7, 118.6 (q,  $J = 320.8$  Hz, 1H), 111.6, 98.4, 98.1, 71.2, 58.6, 56.2, 55.5, 36.2, 28.4, 21.7, 19.6;  $^{19}\text{F}$  NMR (376 MHz,  $\text{CDCl}_3$ )  $\delta$   $-72.9$ ; HRMS (ESI)  $m/z$  612.2018 ( $\text{M}+\text{H}^+$ ), calc. for  $\text{C}_{33}\text{H}_{33}\text{F}_3\text{NO}_5\text{S}^+$  612.2026.

The ee was determined by HPLC analysis: CHIRAL INB (4.6 mm i.d. x 250 mm); Hexane/2-propanol = 95/5; flow rate: 1.0 mL/min; 25 °C; 210 nm; retention time: 10.1 min (minor) and 20.8min (major).

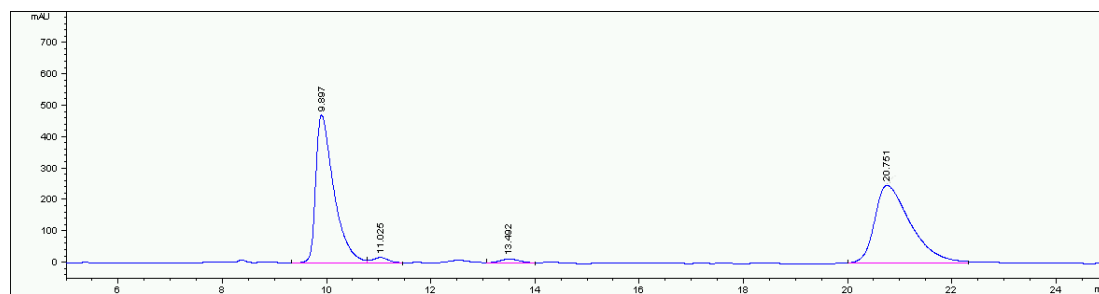

| Entry | Retention Time | Area    | Height | %Area  |
|-------|----------------|---------|--------|--------|
| 1     | 9.897          | 11564.1 | 472.8  | 47.340 |
| 2     | 11.025         | 458.3   | 19.5   | 1.876  |
| 3     | 13.492         | 454.6   | 14.7   | 1.861  |
| 4     | 20.751         | 11951   | 247.9  | 48.923 |

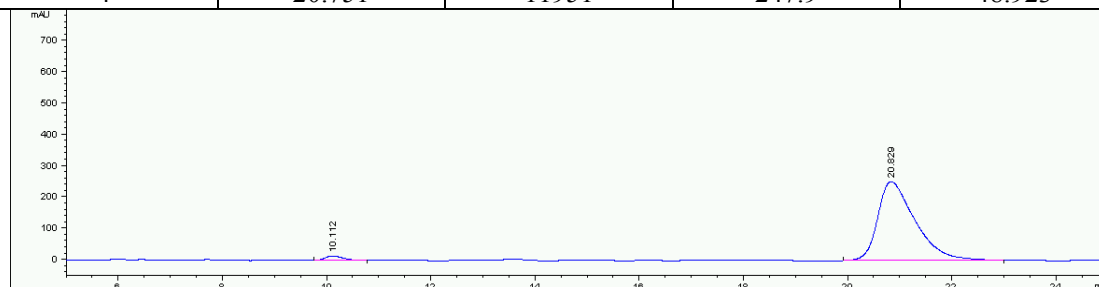

| Entry | Retention Time | Area    | Height | %Area  |
|-------|----------------|---------|--------|--------|
| 1     | 10.112         | 395.8   | 15.2   | 3.021  |
| 2     | 20.829         | 12704.1 | 252.5  | 96.979 |

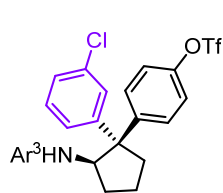

**13h**: yellow oil; 33.3 mg, 60% yield; 92% ee; dr = 5:1;  $[\alpha]_D^{22}$   $-3.5$  ( $c$  1.0,  $\text{CHCl}_3$ );  $^1\text{H}$  NMR (300 MHz,  $\text{Chloroform-}d$ )  $\delta$  7.90 (d,  $J$  = 2.2 Hz, 1H), 7.37 – 7.27 (m, 3H), 7.25 – 7.15 (m, 4H), 6.81 (t,  $J$  = 8.3 Hz, 1H), 6.51 (d,  $J$  = 8.2 Hz, 2H), 4.77 (dd,  $J$  = 9.9, 6.2 Hz, 1H), 3.77 (s, 6H), 3.21 (s, 1H), 2.76 – 2.64 (m, 1H), 2.30 – 2.16 (m, 1H), 1.95 – 1.81 (m, 2H), 1.80 – 1.68 (m, 1H), 1.37 – 1.28 (m, 1H);  $^{13}\text{C}$  NMR (75 MHz,  $\text{CDCl}_3$ )  $\delta$  151.4, 151.0, 148.1, 144.8, 134.1, 131.3, 129.5, 128.0, 126.6, 126.2, 126.1, 120.5, 120.4, 118.8 (q,  $J$  = 320.9 Hz), 104.6, 60.5, 57.1, 55.8, 38.7, 30.6, 19.4;  $^{19}\text{F}$  NMR (376 MHz,  $\text{CDCl}_3$ )  $\delta$   $-72.9$ ,  $-72.9$ ;  $^{19}\text{F}$  NMR (376 MHz,  $\text{CDCl}_3$ )  $\delta$   $-72.88$ ,  $-72.91$ ; HRMS (ESI)  $m/z$  556.1163 ( $\text{M}+\text{H}^+$ ), calc. for  $\text{C}_{26}\text{H}_{26}\text{ClF}_3\text{NO}_5\text{S}^+$  556.1167.

The ee was determined by HPLC analysis: CHIRAL INB (x 2) (4.6 mm i.d. x 250 mm); Hexane/2-propanol = 98/2; flow rate: 1.0 mL/min; 25 °C; 210 nm; retention time: 8.9 min (major) and 13.4 min (minor).

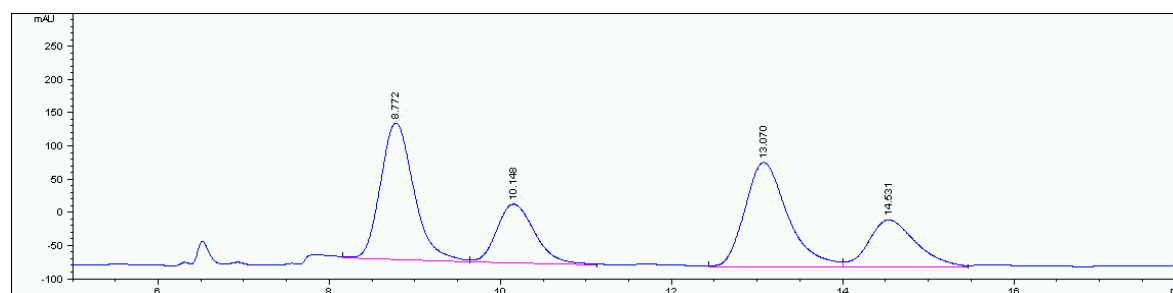

| Entry | Retention Time | Area   | Height | %Area  |
|-------|----------------|--------|--------|--------|
| 1     | 8.772          | 5649.8 | 206.6  | 33.895 |
| 2     | 10.148         | 2775.8 | 88.9   | 16.653 |
| 3     | 13.07          | 5501   | 157.7  | 33.002 |
| 4     | 14.531         | 2742   | 71.2   | 16.450 |

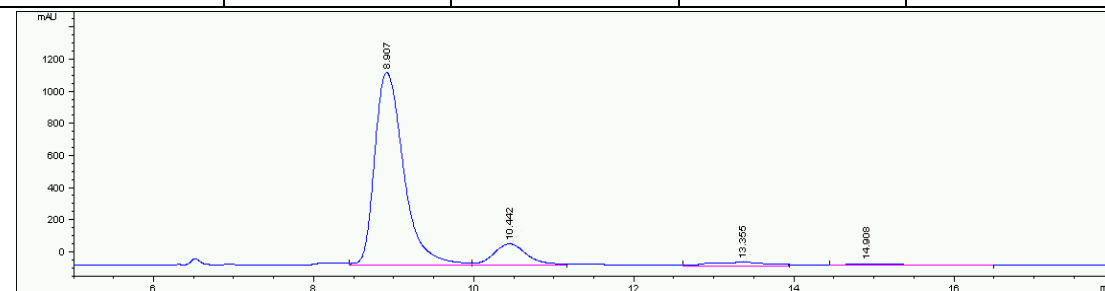

| Entry | Retention Time | Area    | Height | %Area  |
|-------|----------------|---------|--------|--------|
| 1     | 8.907          | 30151.6 | 1200.2 | 84.634 |
| 2     | 10.442         | 3831.4  | 132    | 10.755 |
| 3     | 13.355         | 1265    | 24.1   | 3.551  |
| 4     | 14.908         | 378     | 7.5    | 1.061  |

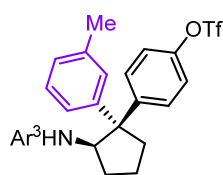

**13i**: yellow oil; 35.3 mg, 66% yield; 94% ee; dr = 6:1;  $[\alpha]_D^{22}$   $-14.8$  ( $c$  1.0,  $\text{CHCl}_3$ );  $^1\text{H NMR}$  (300 MHz,  $\text{Chloroform-}d$ )  $\delta$  7.46–7.40 (m, 1H), 7.38–7.27 (m, 3H), 7.23–7.13 (m, 3H), 7.02 (d,  $J$  = 7.4 Hz, 1H), 6.77 (t,  $J$  = 8.3 Hz, 1H), 6.49 (d,  $J$  = 8.3 Hz, 2H), 4.88 (dd,  $J$  = 9.0, 6.1 Hz, 1H), 3.75 (s, 6H), 2.77–2.63 (m, 1H), 2.38–2.24 (m, 4H), 1.97–1.82 (m, 2H), 1.80–1.65 (m, 1H), 1.44–1.34 (m, 1H);  $^{13}\text{C NMR}$  (75 MHz,  $\text{CDCl}_3$ )  $\delta$  151.00, 148.6, 147.8, 145.8, 137.6, 131.2, 128.3, 128.1, 126.6, 124.8, 120.1, 119.9, 104.7, 60.8, 57.4, 55.8, 38.4, 30.8, 21.7, 19.6;  $^{19}\text{F NMR}$  (376 MHz,  $\text{CDCl}_3$ )  $\delta$   $-72.92$ ,  $-72.95$ ; HRMS (ESI)  $m/z$  536.1708 ( $\text{M}+\text{H}^+$ ), calc. for  $\text{C}_{27}\text{H}_{29}\text{F}_3\text{NO}_5\text{S}^+$  536.1713.

The ee was determined by HPLC analysis: CHIRAL INB (x 2) (4.6 mm i.d. x 250 mm); Hexane/2-propanol = 98/2; flow rate: 1.0 mL/min; 25 °C; 210 nm; retention time: 12.4 min (major) and 14.6 min (minor).

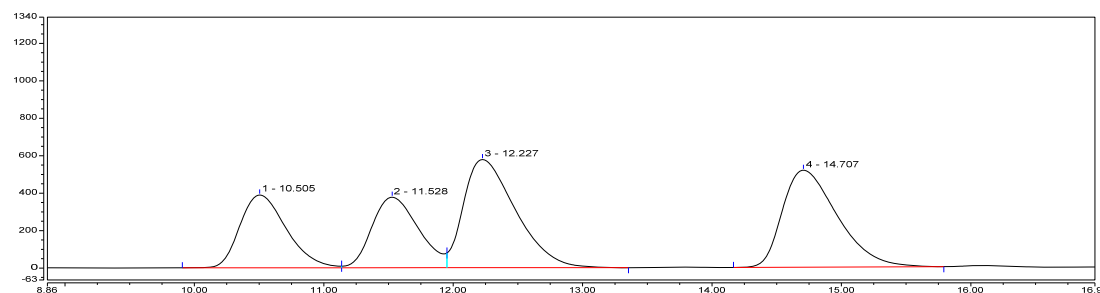

| Entry | Retention Time | Area     | Height   | %Area |
|-------|----------------|----------|----------|-------|
| 1     | 10.505         | 161.1304 | 161.1304 | 19.14 |
| 2     | 11.528         | 156.6051 | 156.6051 | 18.61 |
| 3     | 12.227         | 268.7861 | 268.7861 | 31.94 |
| 4     | 14.707         | 255.1242 | 255.1242 | 30.31 |

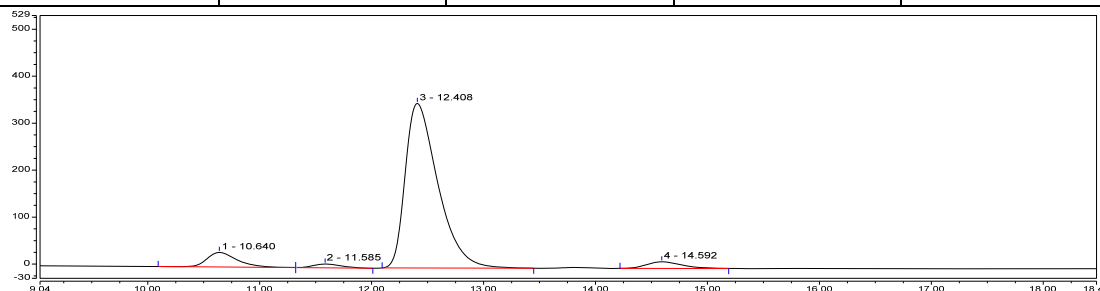

| Entry | Retention Time | Area     | Height | %Area |
|-------|----------------|----------|--------|-------|
| 1     | 10.640         | 9.6628   | 31.01  | 7.13  |
| 2     | 11.585         | 2.3622   | 8.23   | 1.74  |
| 3     | 12.408         | 118.2839 | 350.33 | 87.33 |
| 4     | 14.592         | 5.1429   | 14.12  | 3.80  |

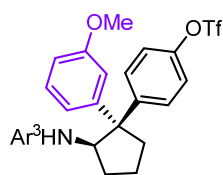

**13j**: yellow oil; 29.2 mg, 53% yield; 93% ee; dr = 6:1;  $[\alpha]_D^{22}$   $-9.4$  ( $c$  1.0,  $\text{CHCl}_3$ );  $^1\text{H NMR}$  (300 MHz,  $\text{Chloroform-}d$ )  $\delta$  7.39 – 7.31 (m, 2H), 7.28 – 7.15 (m, 4H), 7.14 – 7.08 (m, 1H), 6.76 (dd,  $J$  = 8.0, 3.0 Hz, 2H), 6.53 – 6.47 (m, 2H), 4.94 – 4.75 (m, 1H), 3.78 – 3.72 (m, 9H), 3.34 (s, 1H), 2.76 – 2.63 (m, 1H), 2.42 – 2.26 (m, 1H), 1.98 – 1.84 (m, 2H), 1.82 – 1.68 (m, 1H), 1.43 – 1.31 (m, 1H);  $^{13}\text{C NMR}$  (75 MHz,  $\text{CDCl}_3$ )  $\delta$  159.4, 150.9, 150.3, 147.8, 145.5, 131.1, 129.1, 126.4, 120.3, 120.1, 119.7, 118.7 (q,  $J$  = 320.8 Hz), 114.0, 110.7, 104.6, 60.7, 57.5, 55.8, 55.0, 38.2, 30.8, 19.5;  $^{19}\text{F NMR}$  (376 MHz,  $\text{CDCl}_3$ )  $\delta$   $-72.91$ ,  $-72.94$ ; HRMS (ESI)  $m/z$  552.1656 ( $\text{M}+\text{H}^+$ ), calc. for  $\text{C}_{27}\text{H}_{29}\text{F}_3\text{NO}_6\text{S}^+$  552.1662.

The ee was determined by HPLC analysis: CHIRAL INB (x 2) (4.6 mm i.d. x 250 mm); Hexane/2-propanol = 95/5; flow rate: 1.0 mL/min; 25 °C; 210 nm; retention time: 14.0 min (minor) and 14.8 min (major).

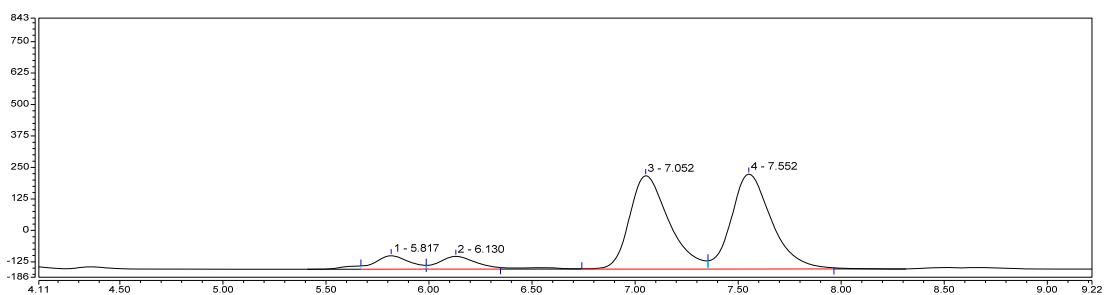

| Entry | Retention Time | Area    | Height | %Area |
|-------|----------------|---------|--------|-------|
| 1     | 5.817          | 10.0445 | 53.41  | 5.35  |
| 2     | 6.130          | 10.3423 | 50.76  | 5.51  |
| 3     | 7.052          | 82.1490 | 370.68 | 43.74 |
| 4     | 7.552          | 85.2685 | 377.25 | 45.40 |

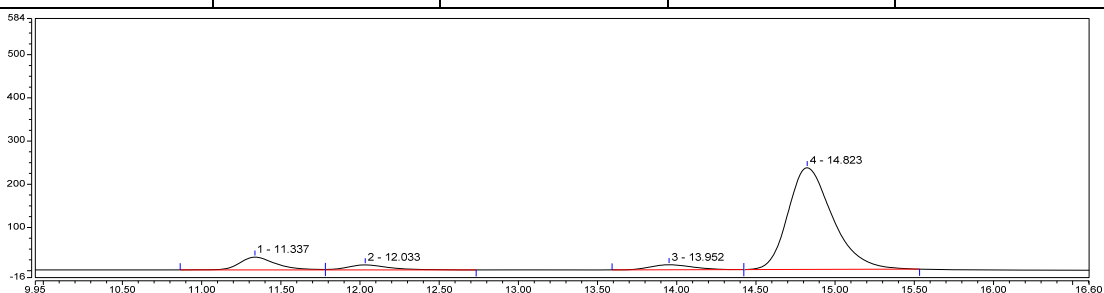

| Entry | Retention Time | Area    | Height | %Area |
|-------|----------------|---------|--------|-------|
| 1     | 11.337         | 7.7570  | 29.57  | 8.47  |
| 2     | 12.033         | 3.4658  | 11.63  | 3.78  |
| 3     | 13.952         | 3.6223  | 11.74  | 3.96  |
| 4     | 14.823         | 76.7374 | 235.56 | 83.79 |

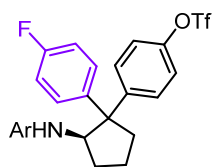

**13k**: white solid; Mp 58.6 - 59.8 °C; 50.4 mg, 82% yield; 91%/89% ee; dr = 1:1;  $[\alpha]_D^{22}$  -93.5 (*c* 1.0, CHCl<sub>3</sub>); <sup>1</sup>H NMR (300 MHz, Chloroform-*d*) δ 7.36 – 7.24 (m, 4H), 7.18 – 7.06 (m, 5H), 7.01 – 6.87 (m, 2H), 6.84 (d, *J* = 8.2 Hz, 1H), 6.77 – 6.66 (m, 2H), 6.38 (dd, *J* = 7.2, 2.7 Hz, 1H), 6.23 – 6.08 (m, 1H), 4.86 – 4.71 (m, 2H), 4.36 – 4.23 (m, 1H), 4.07 (s, 1H), 3.76 (d, *J* = 1.4 Hz, 3H), 2.76 – 2.57 (m, 1H), 2.33 – 2.07 (m, 2H), 2.00 – 1.84 (m, 1H), 1.84 – 1.70 (m, 1H), 1.41 – 1.28 (m, 1H); <sup>13</sup>C NMR (75 MHz, CDCl<sub>3</sub>) δ 161.4 (d, *J* = 246.5 Hz), 161.1 (d, *J* = 245.5 Hz), 155.1, 149.3, 147.9, 147.6, 144.6, 143.6, 143.5, 141.0 (d, *J* = 2.0 Hz), 138.9, 138.9, 138.2, 136.9, 136.8, 130.5, 130.4, 130.2, 129.1, 128.7, 128.6, 128.4, 128.4, 128.1, 128.0, 127.9, 127.6, 120.9, 120.7, 118.7 (q, *J* = 320.9 Hz), 118.6 (q, *J* = 320.7 Hz), 115.1 (d, *J* = 21.1 Hz), 115.0 (d, *J* = 21.0 Hz), 111.8, 98.5, 71.2, 71.1, 58.7, 58.5, 56.5, 56.2, 55.4, 38.2, 38.0, 29.6, 29.4, 19.8, 19.7; <sup>19</sup>F NMR (376 MHz, CDCl<sub>3</sub>) δ -72.9, -73.0, -115.6, -116.4; HRMS (ESI) *m/z* 616.1763 (M+H<sup>+</sup>), calc. for C<sub>32</sub>H<sub>30</sub>F<sub>4</sub>NO<sub>6</sub>S<sup>+</sup> 616.1775.

The ee was determined by HPLC analysis: CHIRALPAK MQ (x 2) (4.6 mm i.d. x 250 mm); Hexane/2-propanol = 99/1; flow rate: 1.0 mL/min; 25 °C; 210 nm; retention time: 8.9 min (major) and 11.5min (minor).

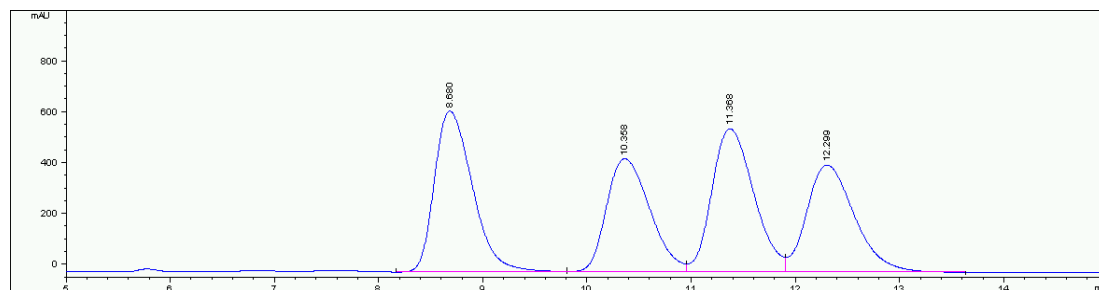

| Entry | Retention Time | Area    | Height | %Area  |
|-------|----------------|---------|--------|--------|
| 1     | 8.68           | 16134.4 | 633.3  | 27.591 |
| 2     | 10.358         | 12940.4 | 446.5  | 22.129 |
| 3     | 11.368         | 15885.1 | 564.5  | 27.164 |
| 4     | 12.299         | 13518.1 | 422.5  | 23.117 |

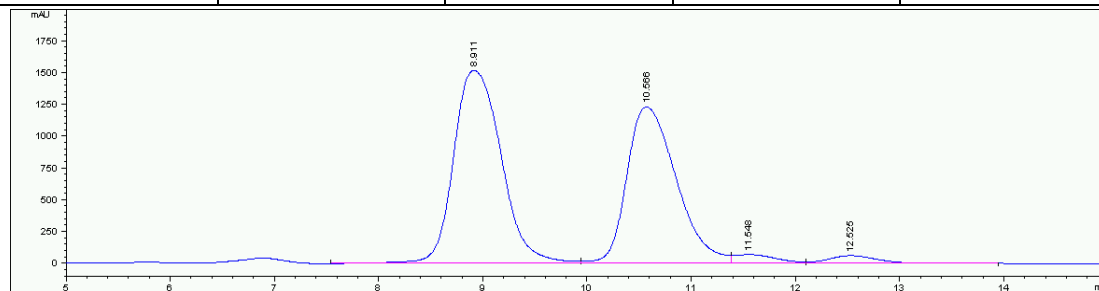



| Entry | Retention Time | Area    | Height | %Area  |
|-------|----------------|---------|--------|--------|
| 1     | 8.911          | 48620.7 | 1522.2 | 51.974 |
| 2     | 10.566         | 40817.7 | 1233.6 | 43.632 |
| 3     | 11.548         | 1988.9  | 70.8   | 2.126  |
| 4     | 12.525         | 2121.6  | 62.4   | 2.268  |

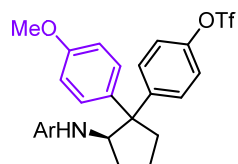

**131**: white solid; Mp 57.8 - 58.7 °C; 54.5 mg, 87% yield; 92%/88% ee; dr = 1:1;  $[\alpha]_D^{22}$  -49.5 (c 1.0, CHCl<sub>3</sub>); <sup>1</sup>H NMR (300 MHz, Chloroform-*d*) δ 7.38 – 7.31 (m, 4H), 7.22 – 7.12 (m, 5H), 6.99 (d, *J* = 8.7 Hz, 1H), 6.90 (d, *J* = 8.7 Hz, 1H), 6.84 – 6.72 (m, 2H), 6.66 (d, *J* = 8.7 Hz, 1H), 6.43 (dd, *J* = 10.5, 2.8 Hz, 1H), 6.24 – 6.12 (m, 1H), 4.95 – 4.80 (m, 2H), 4.39 – 4.28 (m, 1H), 3.82 (d, *J* = 1.5 Hz, 3H), 3.79 (s, 1.4H), 3.71 (s, 1.6H), 2.82 – 2.64 (m, 1H), 2.36 – 2.13 (m, 2H), 2.06 – 1.91 (m, 1H), 1.89 – 1.74 (m, 1H), 1.51 – 1.37 (m, 1H); <sup>13</sup>C NMR (75 MHz, CDCl<sub>3</sub>) δ 158.2, 157.8, 155.2, 155.1, 149.8, 147.8, 147.5, 145.2, 141.0, 140.9, 139.8, 138.4, 138.3, 137.0, 136.9, 135.2, 130.5, 129.8, 129.1, 128.4, 128.3, 128.0, 128.0, 127.8, 127.5, 120.8, 120.6, 113.7, 113.6, 112.2, 111.9, 98.6, 98.4, 71.2, 71.2, 59.0, 58.7, 56.6, 56.0, 55.5, 55.1, 55.1, 38.2, 37.8, 29.8, 29.4, 20.0, 19.8; <sup>19</sup>F NMR (376 MHz, CDCl<sub>3</sub>) δ -72.9, -73.0; HRMS (ESI) *m/z* 628.1968 (M+H<sup>+</sup>), calc. for C<sub>33</sub>H<sub>33</sub>F<sub>3</sub>NO<sub>6</sub>S<sup>+</sup> 628.1975.

The ee was determined by HPLC analysis: Lux i-Amylose-3 (4.6 mm i.d. x 250 mm) - Lux Amylose-1 (4.6 mm i.d. x 250 mm); Hexane/2-propanol = 85/15; flow rate: 1.0 mL/min; 25 °C; 210 nm; retention time: 11.2 min (major) and 11.7 min (minor).

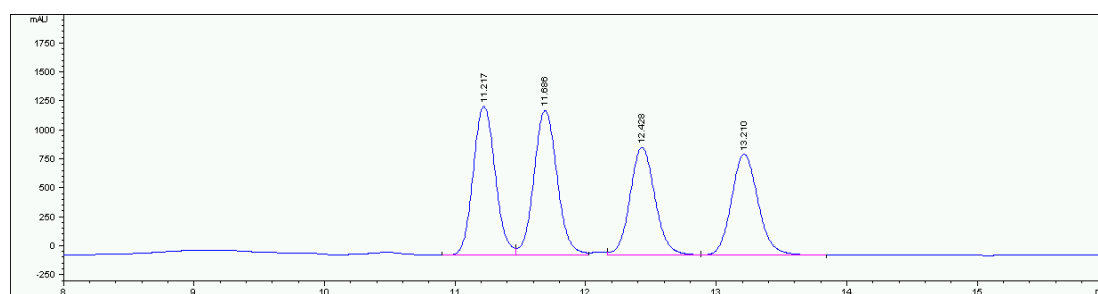

| Entry | Retention Time | Area    | Height | %Area  |
|-------|----------------|---------|--------|--------|
| 1     | 11.217         | 15108.9 | 1284.7 | 27.275 |
| 2     | 11.686         | 15490.7 | 1250.6 | 27.964 |
| 3     | 12.428         | 12407.8 | 932.5  | 22.399 |
| 4     | 13.21          | 12386.9 | 873.4  | 22.361 |

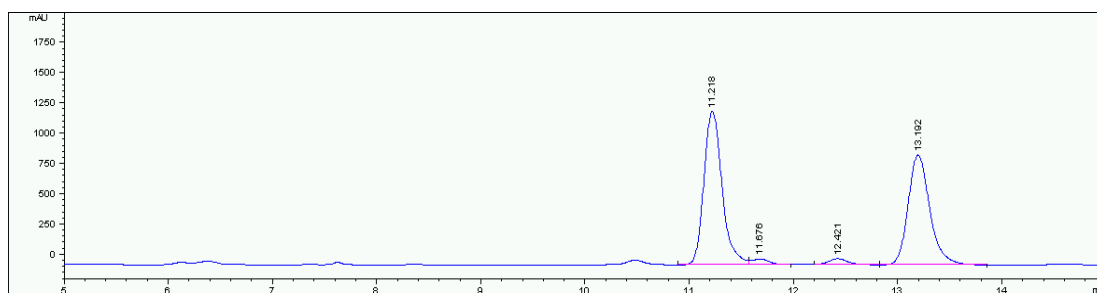

| Entry | Retention Time | Area    | Height | %Area  |
|-------|----------------|---------|--------|--------|
| 1     | 11.218         | 15455.2 | 1266.1 | 51.679 |
| 2     | 11.676         | 579.8   | 48.6   | 1.939  |
| 3     | 12.421         | 705.9   | 51.5   | 2.361  |
| 4     | 13.192         | 13165.1 | 907    | 44.022 |

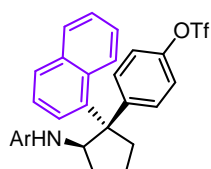

**13m**: white solid; Mp 72.6 - 73.8 °C; 38.8 mg, 60% yield; 92% ee; dr > 19:1;  $[\alpha]_D^{22}$  -6.0 (*c* 1.0, CHCl<sub>3</sub>); <sup>1</sup>H NMR (300 MHz, Chloroform-*d*) δ 7.64 (dd, *J* = 11.9, 8.1 Hz, 2H), 7.47 (d, *J* = 7.3 Hz, 1H), 7.30 (d, *J* = 7.7 Hz, 1H), 7.25 – 7.10 (m, 6H), 7.10 – 6.95 (m, 4H), 6.61 (d, *J* = 8.6 Hz, 1H), 6.35 (d, *J* = 2.8 Hz, 1H), 6.04 (dd, *J* = 8.6, 2.8 Hz, 1H), 4.76 – 4.61 (m, 2H), 4.49 – 4.33 (m, 1H), 3.98 – 3.84 (m, 1H), 3.70 (s, 3H), 3.19 – 3.05 (m, 1H), 2.34 – 2.21 (m, 1H), 2.13 – 1.92 (m, 2H), 1.83 – 1.70 (m, 1H), 1.34 – 1.21 (m, 1H); <sup>13</sup>C NMR (75 MHz, CDCl<sub>3</sub>) δ 155.2, 148.0, 144.9, 143.4, 140.9, 138.4, 136.8, 135.0, 131.5, 128.9, 128.4, 128.1, 128.1, 127.9, 126.8, 125.3, 125.0, 124.9, 124.0, 120.9, 111.7, 98.2, 98.0, 71.2, 58.8, 56.31, 55.5, 38.3, 28.7, 20.0; <sup>19</sup>F NMR (376 MHz, CDCl<sub>3</sub>) δ -73.0; HRMS (ESI) *m/z* 648.2023 (M+H<sup>+</sup>), calc. for C<sub>36</sub>H<sub>33</sub>F<sub>3</sub>NO<sub>5</sub>S<sup>+</sup> 648.2026.

The ee was determined by HPLC analysis: CHIRAL MQ (x 2) (4.6 mm i.d. x 250 mm); Hexane/2-propanol = 98/2; flow rate: 1.0 mL/min; 25 °C; 210 nm; retention time: 7.7 min (major) and 8.8 min (minor).

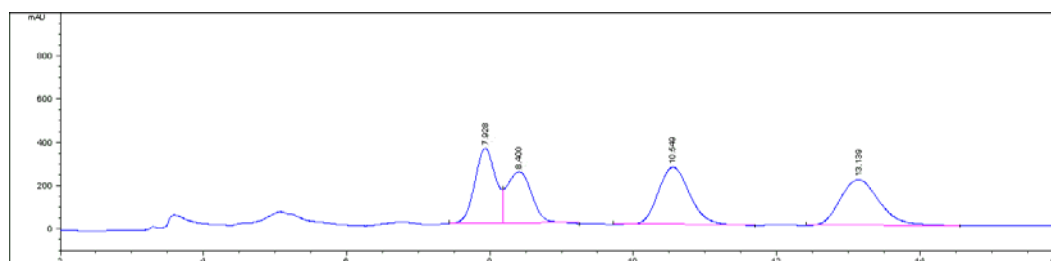

| Entry | Retention Time | Area | Height | %Area |
|-------|----------------|------|--------|-------|
|-------|----------------|------|--------|-------|

|   |        |        |       |        |
|---|--------|--------|-------|--------|
| 1 | 7.928  | 7150.5 | 347   | 24.650 |
| 2 | 8.4    | 5624.1 | 237.2 | 19.388 |
| 3 | 10.549 | 8114.5 | 266.3 | 27.973 |
| 4 | 13.139 | 8119.4 | 211.8 | 27.990 |

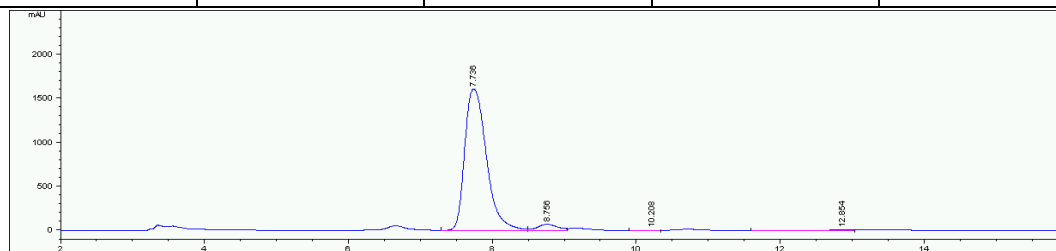

| Entry | Retention Time | Area    | Height | %Area  |
|-------|----------------|---------|--------|--------|
| 1     | 7.736          | 33973.5 | 1611   | 93.917 |
| 2     | 8.756          | 1533.1  | 74.8   | 4.238  |
| 3     | 10.208         | 147.9   | 7      | 0.409  |
| 4     | 12.854         | 519.6   | 9.7    | 1.436  |

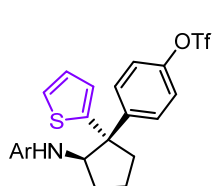

**13n**: yellow oil; 52.5 mg, 87% yield; 95%/65% ee; dr = 2:1;  $[\alpha]_D^{22}$   $-27.0$  (*c* 1.0,  $\text{CHCl}_3$ );  $^1\text{H}$  NMR (300 MHz,  $\text{CHloroform-}d$ )  $\delta$  7.49 (d,  $J = 8.5$  Hz, 1H), 7.41 – 7.30 (m, 4H), 7.29 – 7.24 (m, 1H), 7.23 – 7.10 (m, 3H), 7.03 – 6.91 (m, 2H), 6.83 – 6.78 (m, 1H), 6.75 (d,  $J = 8.5$  Hz, 0.5H), 6.62 (d,  $J = 3.6$  Hz, 0.5H), 6.41 (dd,  $J = 9.7, 2.7$  Hz, 1H), 6.26 – 6.15 (m, 1H), 5.00 – 4.81 (m, 2H), 4.65 – 4.20 (m, 2H), 3.82 (d,  $J = 1.8$  Hz, 3H), 2.87 – 2.65 (m, 1H), 2.60 – 2.36 (m, 1H), 2.35 – 2.21 (m, 1H), 2.18 – 1.82 (m, 2H), 1.72 – 1.53 (m, 1H);  $^{13}\text{C}$  NMR (75 MHz,  $\text{CDCl}_3$ )  $\delta$  155.2, 155.0, 151.8, 148.9, 148.0, 147.8, 147.8, 144.1, 140.8, 138.4, 138.2, 137.0, 137.0, 130.0, 129.0, 128.4, 128.3, 128.0, 127.7, 127.6, 127.5, 126.8, 126.7, 126.4, 124.6, 124.0, 123.8, 120.8, 120.8, 112.2, 112.1, 98.7, 98.6, 98.5, 98.4, 71.2, 71.1, 62.0, 59.2, 56.2, 55.5, 55.4, 54.6, 40.5, 38.0, 30.3, 29.4, 20.5, 19.4;  $^{19}\text{F}$  NMR (376 MHz,  $\text{CDCl}_3$ )  $\delta$   $-72.9, -73.0$ ; HRMS (ESI)  $m/z$  604.1428 ( $\text{M}+\text{H}^+$ ), calc. for  $\text{C}_{30}\text{H}_{29}\text{F}_3\text{NO}_5\text{S}_2^+$  604.1434.

The ee was determined by HPLC analysis: Lux Amylose-1 (4.6 mm i.d. x 250 mm) - CHIRAL MQ (x 2) (4.6 mm i.d. x 250 mm); Hexane/2-propanol = 95/5; flow rate: 1.0 mL/min; 25 °C; 210 nm; retention time: 16.7min (major) and 18.9min (minor).

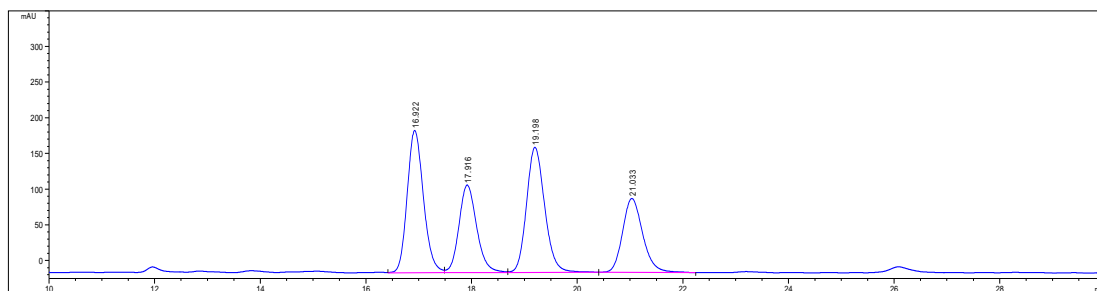

| Entry | Retention Time | Area   | Height | %Area  |
|-------|----------------|--------|--------|--------|
| 1     | 16.922         | 4240.1 | 199.1  | 30.243 |
| 2     | 17.916         | 2851.8 | 122.6  | 20.341 |
| 3     | 19.198         | 4192.6 | 175.3  | 29.904 |
| 4     | 21.033         | 2735.6 | 103.4  | 19.512 |

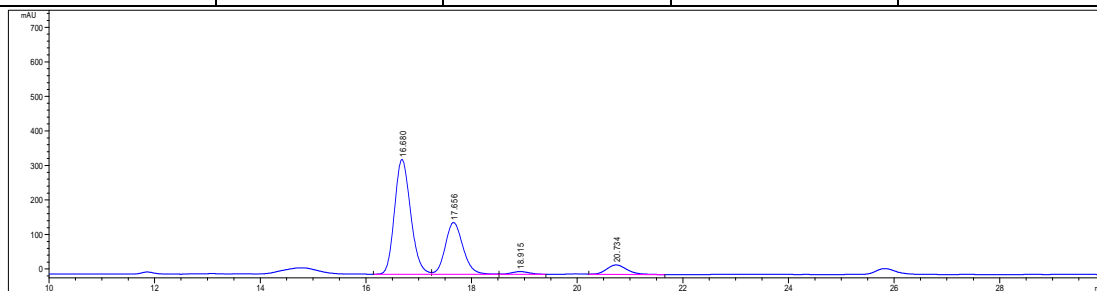

| Entry | Retention Time | Area   | Height | %Area  |
|-------|----------------|--------|--------|--------|
| 1     | 16.68          | 7063.5 | 332.1  | 61.741 |
| 2     | 17.656         | 3476.6 | 150    | 30.388 |
| 3     | 18.915         | 174.8  | 7.7    | 1.528  |
| 4     | 20.734         | 725.7  | 27.3   | 6.343  |

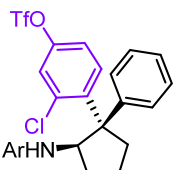
**13o**: white solid; Mp 56.7 - 57.8 °C; 40.4 mg, 64% yield; 89% ee; dr = 11:1;  $[\alpha]_D^{22}$  -20.2 (*c* 1.0, CHCl<sub>3</sub>); <sup>1</sup>H NMR (300 MHz, Chloroform-*d*) δ 7.61 (d, *J* = 8.8 Hz, 1H), 7.40 – 7.29 (m, 3H), 7.22 (d, *J* = 2.7 Hz, 1H), 7.20 – 7.11 (m, 4H), 7.11 – 7.03 (m, 2H), 6.97 (d, *J* = 7.5 Hz, 2H), 6.74 (d, *J* = 8.6 Hz, 1H), 6.42 (d, *J* = 2.8 Hz, 1H), 6.16 (dd, *J* = 8.6, 2.8 Hz, 1H), 4.93 – 4.75 (m, 2H), 4.34 – 4.21 (m, 1H), 4.09 (s, 1H), 3.81 (s, 3H), 3.45 – 3.30 (m, 1H), 2.30 (dt, *J* = 13.4, 7.1 Hz, 1H), 2.12 – 1.97 (m, 2H), 1.94 – 1.80 (m, 1H), 1.34 – 1.26 (m, 1H); <sup>13</sup>C NMR (75 MHz, CDCl<sub>3</sub>) δ 155.2, 147.5, 147.0, 141.3, 140.9, 138.2, 136.9, 136.1, 129.8, 128.4, 128.2, 127.9, 127.8, 127.8, 126.7, 124.0, 119.2, 118.7 (q, *J* = 321.0 Hz), 112.0, 98.3, 98.2, 71.2, 58.6, 56.1, 55.5, 35.4, 28.1, 19.4; <sup>19</sup>F NMR (376 MHz, CDCl<sub>3</sub>) δ -72.8, -72.9; HRMS (ESI) *m/z* 632.1473 (M+H<sup>+</sup>), calc. for C<sub>32</sub>H<sub>30</sub>ClF<sub>3</sub>NO<sub>5</sub>S<sup>+</sup> 632.1480.

The ee was determined by HPLC analysis: CHIRALPAK IF (x 2) (4.6 mm i.d. x 250 mm); Hexane/2-propanol = 97/3; flow rate: 1.0 mL/min; 25 °C; 210 nm; retention time: 11.4 min

(major) and 12.2 min (minor).

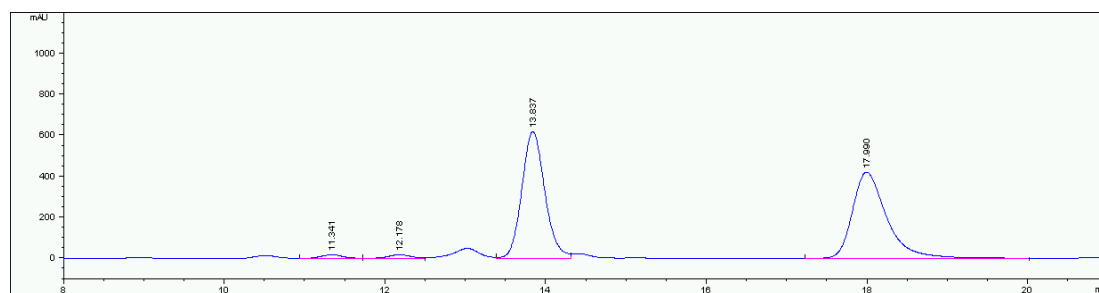

| Entry | Retention Time | Area    | Height | %Area  |
|-------|----------------|---------|--------|--------|
| 1     | 11.341         | 383.5   | 18.7   | 1.489  |
| 2     | 12.178         | 406.5   | 19.1   | 1.578  |
| 3     | 13.837         | 12374.7 | 619.6  | 48.036 |
| 4     | 17.99          | 12596.5 | 421.4  | 48.897 |

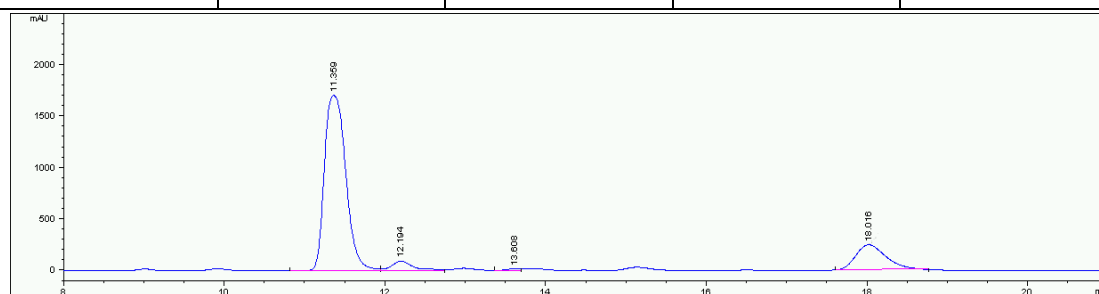

| Entry | Retention Time | Area    | Height | %Area  |
|-------|----------------|---------|--------|--------|
| 1     | 11.359         | 31415.6 | 1703.9 | 79.136 |
| 2     | 12.194         | 1760.2  | 92.8   | 4.434  |
| 3     | 13.608         | 221.5   | 16.9   | 0.558  |
| 4     | 18.016         | 6301    | 242.4  | 15.872 |

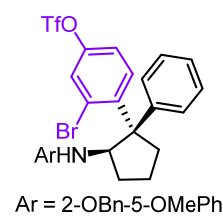

**13p**: white solid; Mp 83.1 - 84.9 °C; 45.2 mg, 67% yield; 92% ee; dr = 8:1;  $[\alpha]_D^{22}$  -13.2 (*c* 1.0, CHCl<sub>3</sub>); <sup>1</sup>H NMR (300 MHz, Chloroform-*d*) δ 7.58 (d, *J* = 8.9 Hz, 1H), 7.42 (d, *J* = 2.7 Hz, 1H), 7.37 – 7.28 (m, 3H), 7.21 (dd, *J* = 8.9, 2.6 Hz, 1H), 7.17 – 7.10 (m, 3H), 7.10 – 7.02 (m, 2H), 6.96 (d, *J* = 7.4 Hz, 2H), 6.73 (d, *J* = 8.6 Hz, 1H), 6.40 (d, *J* = 2.8 Hz, 1H), 6.15 (dd, *J* = 8.6, 2.8 Hz, 1H), 4.90 – 4.73 (m, 2H), 4.26 (s, 1H), 4.16 – 3.99 (m, 1H), 3.80 (s, 3H), 3.55 – 3.41 (m, 1H), 2.37 – 3.25 (m, 1H), 2.10 – 1.96 (m, 2H), 1.92 – 1.79 (m, 1H), 1.34 – 1.26 (m, 1H); <sup>13</sup>C NMR (75 MHz, CDCl<sub>3</sub>) δ 155.2, 148.4, 147.3, 141.2, 140.9, 138.2, 136.8, 130.1, 128.4, 128.2, 128.2, 127.8, 127.8, 127.5, 126.6, 125.3, 119.7, 112.0, 98.3, 98.2, 71.2, 58.7, 57.0, 55.5, 35.5, 28.1, 19.4; <sup>19</sup>F NMR (376 MHz, CDCl<sub>3</sub>) δ -72.8, -72.9; HRMS (ESI) *m/z* 676.0970 (M+H<sup>+</sup>), calc. for C<sub>32</sub>H<sub>30</sub>BrF<sub>3</sub>NO<sub>5</sub>S<sup>+</sup> 676.0975.

The ee was determined by HPLC analysis: CHIRAL INB (4.6 mm i.d. x 250 mm);

Hexane/2-propanol = 95/5; flow rate: 1.0 mL/min; 25 °C; 210 nm; retention time: 8.9 min (major) and 9.7 min (minor).

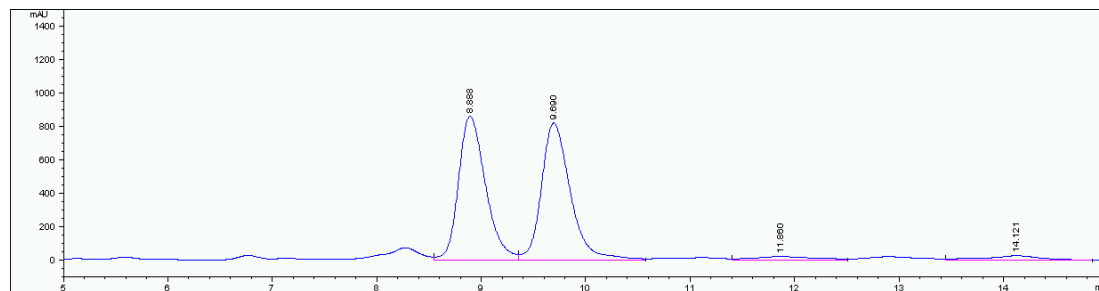

| Entry | Retention Time | Area    | Height | %Area  |
|-------|----------------|---------|--------|--------|
| 1     | 8.888          | 15609   | 862.4  | 46.175 |
| 2     | 9.69           | 15992.4 | 821.6  | 47.309 |
| 3     | 11.86          | 1020.2  | 23     | 3.018  |
| 4     | 14.121         | 1182.5  | 28.5   | 3.498  |

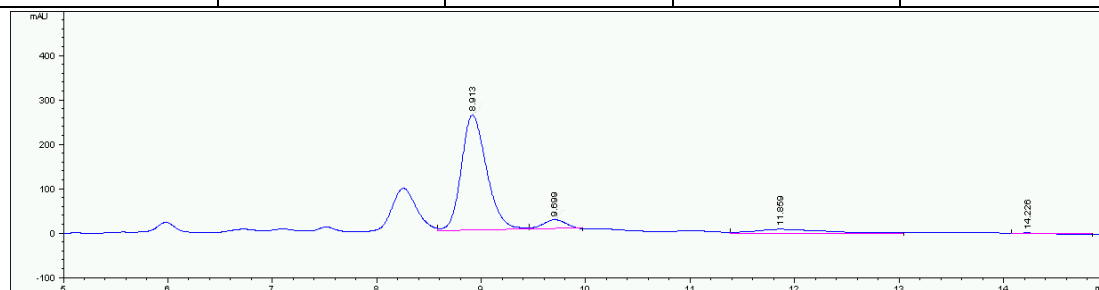

| Entry | Retention Time | Area   | Height | %Area  |
|-------|----------------|--------|--------|--------|
| 1     | 8.913          | 4413.5 | 260.1  | 81.629 |
| 2     | 9.699          | 332.7  | 21.3   | 6.154  |
| 3     | 11.859         | 611.3  | 10.9   | 11.305 |
| 4     | 14.226         | 49.3   | 2.5    | 0.912  |


**13q**: white solid; Mp 135.4 - 136.4 °C; 36.7 mg, 60% yield; 92% ee; dr > 19:1;  $[\alpha]_D^{22}$  -21.8 (*c* 1.0, CHCl<sub>3</sub>); <sup>1</sup>H NMR (300 MHz, Chloroform-*d*) δ 7.51 (d, *J* = 8.8 Hz, 1H), 7.32 (dd, *J* = 5.1, 2.0 Hz, 3H), 7.19 – 7.12 (m, 3H), 7.09 – 6.94 (m, 6H), 6.74 (d, *J* = 8.6 Hz, 1H), 6.43 (d, *J* = 2.8 Hz, 1H), 6.15 (dd, *J* = 8.6, 2.8 Hz, 1H), 4.90 – 4.75 (m, 2H), 4.38 – 4.25 (m, 1H), 3.81 (s, 3H), 3.10 – 2.94 (m, 6.1 Hz, 1H), 2.38 – 2.34 (m, 1H), 2.11 – 1.99 (m, 2H), 1.90 – 1.82 (m, 4H), 1.33 – 1.27 (m, 1H); <sup>13</sup>C NMR (75 MHz, CDCl<sub>3</sub>) δ 155.1, 147.6, 147.6, 142.3, 140.8, 140.4, 138.3, 136.9, 128.3, 128.2, 127.9, 127.8, 127.8, 126.6, 124.2, 118.7 (q, *J* = 320.7 Hz), 117.8, 111.8, 98.1, 97.8, 71.1, 58.7, 55.8, 55.4, 35.9, 28.0, 21.8, 19.5; <sup>19</sup>F NMR (376 MHz, CDCl<sub>3</sub>) δ -73.0; HRMS (ESI) *m/z* 612.2020 (M+H<sup>+</sup>), calc. for C<sub>33</sub>H<sub>33</sub>F<sub>3</sub>NO<sub>5</sub>S<sup>+</sup> 612.2026.

The ee was determined by HPLC analysis: Lux i-Amylose-1 (4.6 mm i.d. x 250 mm);

Hexane/2-propanol = 99/1; flow rate: 1.0 mL/min; 25 °C; 210 nm; retention time: 9.1 min (major) and 10.5 min (minor).

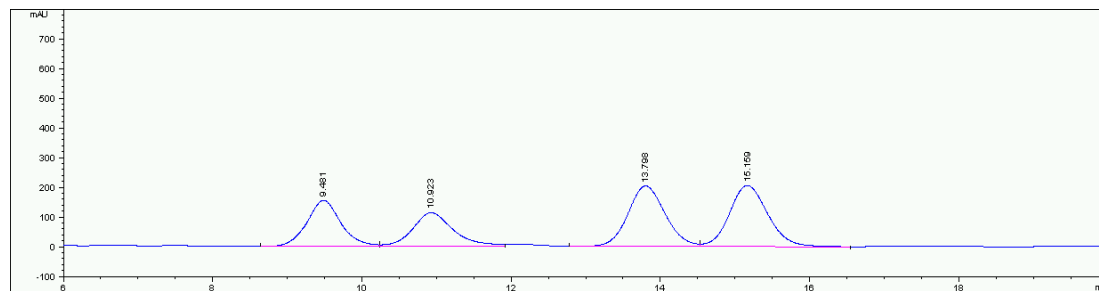

| Entry | Retention Time | Area    | Height | %Area  |
|-------|----------------|---------|--------|--------|
| 1     | 9.283          | 8161.4  | 248.1  | 21.527 |
| 2     | 10.569         | 7501.2  | 189    | 19.785 |
| 3     | 13.171         | 10965.2 | 306.5  | 28.922 |
| 4     | 14.874         | 11285.4 | 300    | 29.766 |

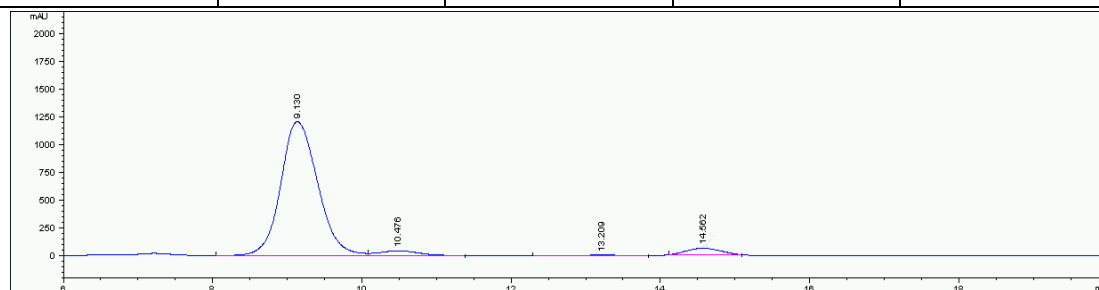

| Entry | Retention Time | Area    | Height | %Area  |
|-------|----------------|---------|--------|--------|
| 1     | 9.13           | 41728.3 | 1208.3 | 91.100 |
| 2     | 10.476         | 1741.4  | 45.3   | 3.802  |
| 3     | 13.209         | 263.1   | 6.5    | 0.574  |
| 4     | 14.562         | 2071.9  | 62.6   | 4.523  |

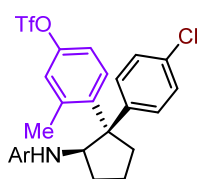

**13r**: white solid; Mp 79.1 - 80.2 °C; 54.8 mg, 85% yield; 93% ee; dr > 19:1;  $[\alpha]_D^{22}$  -32.2 (*c* 1.0, CHCl<sub>3</sub>); <sup>1</sup>H NMR (300 MHz, Chloroform-*d*) δ 7.49 (d, *J* = 8.8 Hz, 1H), 7.42 – 7.34 (m, 3H), 7.23 – 7.14 (m, 2H), 7.10 – 6.86 (m, 6H), 6.77 (d, *J* = 8.6 Hz, 1H), 6.45 (d, *J* = 2.8 Hz, 1H), 6.19 (dd, *J* = 8.6, 2.8 Hz, 1H), 4.94 – 4.77 (m, 2H), 4.30 (dd, *J* = 11.6, 6.3 Hz, 1H), 4.18 – 3.99 (m, 1H), 3.82 (s, 3H), 3.06 – 2.92 (m, 1H), 2.40 – 2.52 (m, 1H), 2.10 – 1.97 (m, 2H), 1.97 – 1.86 (m, 1H), 1.84 (s, 3H), 1.33 – 1.23 (m, 1H); <sup>13</sup>C NMR (75 MHz, CDCl<sub>3</sub>) δ 155.2, 147.8, 147.0, 141.0, 140.2, 138.0, 136.7, 132.6, 129.3, 128.5, 128.4, 128.3, 128.1, 127.8, 124.3, 118.8 (q, *J* = 320.6 Hz), 118.0, 111.8, 98.4, 98.3, 71.2, 58.8, 55.6, 55.5, 35.9, 28.2, 21.8, 19.4; <sup>19</sup>F NMR (376 MHz, CDCl<sub>3</sub>) δ -73.0; HRMS (ESI) *m/z* 646.1626 (M+H<sup>+</sup>), calc. for C<sub>33</sub>H<sub>32</sub>ClF<sub>3</sub>NO<sub>5</sub>S<sup>+</sup> 646.1636.

The ee was determined by HPLC analysis: Lux Amylose-1 (4.6 mm i.d. x 250 mm) - CHIRAL MQ (x 2) (4.6 mm i.d. x 250 mm); Hexane/2-propanol = 95/5; flow rate: 1.0 mL/min; 25 °C; 210 nm; retention time: 10.4 min (major) and 11.1 min (minor).

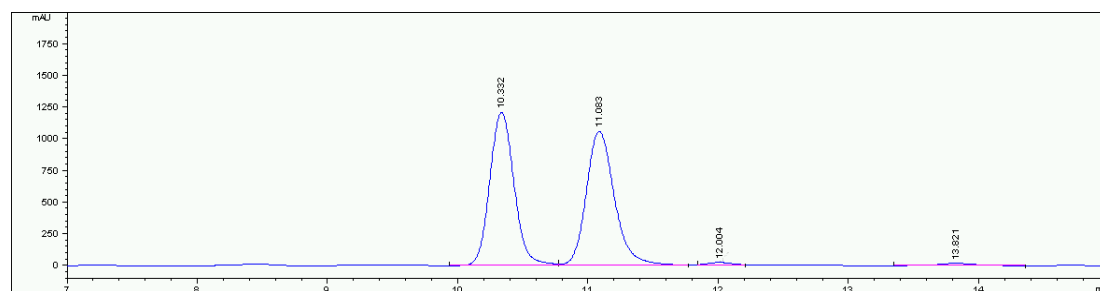

| Entry | Retention Time | Area    | Height | %Area  |
|-------|----------------|---------|--------|--------|
| 1     | 10.332         | 15735.1 | 1209.5 | 48.391 |
| 2     | 11.083         | 16039   | 1060.1 | 49.326 |
| 3     | 12.004         | 370.2   | 25.6   | 1.138  |
| 4     | 13.821         | 372.1   | 18.3   | 1.144  |

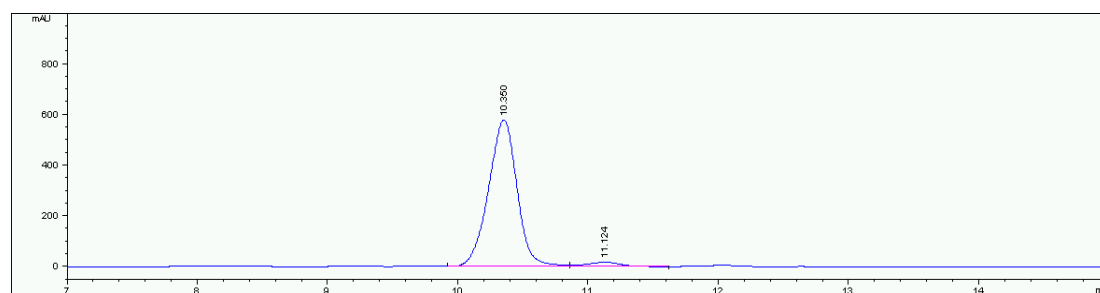

| Entry | Retention Time | Area   | Height | %Area  |
|-------|----------------|--------|--------|--------|
| 1     | 10.35          | 8873.2 | 580    | 96.295 |
| 2     | 11.124         | 341.4  | 18     | 3.705  |

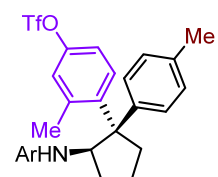

**13s**: white solid; Mp 71.7 - 72.8 °C; 42.5 mg, 68% yield; 92% ee; dr > 19:1;  $[\alpha]_D^{22}$  -26.8 (*c* 1.0, CHCl<sub>3</sub>); <sup>1</sup>H NMR (300 MHz, Chloroform-*d*) δ 7.50 (d, *J* = 8.8 Hz, 1H), 7.38 – 7.32 (m, 3H), 7.26 – 7.18 (m, 2H), 7.07 (dd, *J* = 8.7, 2.9 Hz, 1H), 6.97 (d, *J* = 2.9 Hz, 1H), 6.94 – 6.80 (m, 4H), 6.76 (d, *J* = 8.6 Hz, 1H), 6.47 (d, *J* = 2.8 Hz, 1H), 6.24 – 6.14 (m, 1H), 4.93 – 4.77 (m, 2H), 4.28 (dd, *J* = 11.4, 6.2 Hz, 1H), 3.83 (s, 3H), 3.10 – 2.98 (m, 1H), 2.34 – 2.28 (m, 1H), 2.25 (s, 3H), 2.09 – 1.97 (m, 2H), 1.90 – 1.80 (m, 4H), 1.41 – 1.30 (m, 1H); <sup>13</sup>C NMR (75 MHz, CDCl<sub>3</sub>) δ 155.2, 147.7, 147.6, 140.9, 140.5, 139.1, 138.1, 137.0, 136.1, 129.0, 128.3, 128.2, 127.9, 127.8, 127.8, 124.2, 118.7 (q, *J* = 320.6 Hz), 117.8, 112.1, 98.5, 98.3, 71.3, 59.0, 55.7, 55.5, 35.8, 28.1, 21.8, 20.9, 19.6; <sup>19</sup>F NMR (376 MHz, CDCl<sub>3</sub>) δ -73.0; HRMS (ESI) *m/z* 626.2175 (M+H<sup>+</sup>), calc. for C<sub>34</sub>H<sub>35</sub>F<sub>3</sub>NO<sub>5</sub>S<sup>+</sup> 626.2183.



The ee was determined by HPLC analysis: Lux i-Amylose-3 (4.6 mm i.d. x 250 mm) - CHIRAL MQ (x 2) (4.6 mm i.d. x 250 mm); Hexane/2-propanol = 98/2; flow rate: 1.0 mL/min; 25 °C; 210 nm; retention time: 15.3 min (major) and 17.0 min (minor).

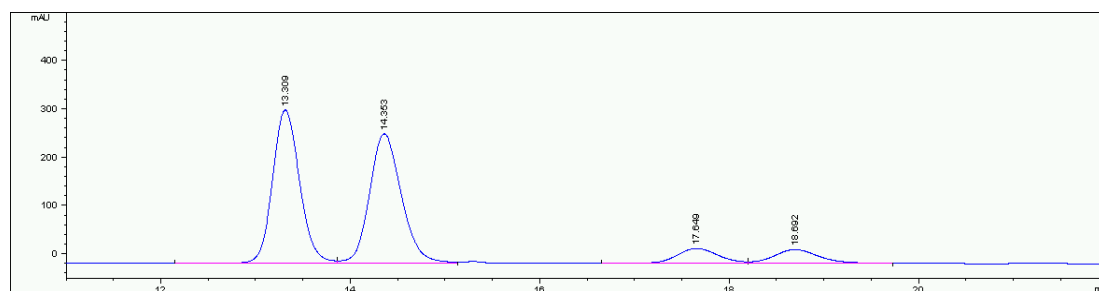

| Entry | Retention Time | Area   | Height | %Area  |
|-------|----------------|--------|--------|--------|
| 1     | 13.309         | 6335.7 | 317.5  | 43.507 |
| 2     | 14.353         | 6285.4 | 268.1  | 43.162 |
| 3     | 17.649         | 978.7  | 31.2   | 6.721  |
| 4     | 18.692         | 962.5  | 28.7   | 6.610  |

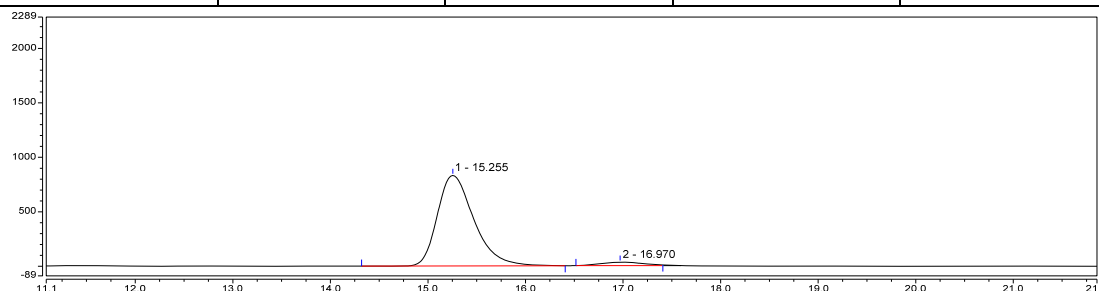

| Entry | Retention Time | Area     | Height | %Area |
|-------|----------------|----------|--------|-------|
| 1     | 15.255         | 360.3622 | 831.70 | 95.82 |
| 2     | 16.970         | 15.7195  | 31.22  | 4.18  |

**13t**: yellow oil; 46.8 mg, 73% yield; 90% ee; dr > 19:1;  $[\alpha]_D^{22}$  -16.3 (*c* 1.0, CHCl<sub>3</sub>); <sup>1</sup>H NMR (300 MHz, Chloroform-*d*) δ 7.49 (d, *J* = 8.8 Hz, 1H), 7.35 – 7.29 (m, 3H), 7.21 – 7.12 (m, 2H), 7.04 (dd, *J* = 8.8, 2.8 Hz, 1H), 6.98 – 6.80 (m, 3H), 6.74 (d, *J* = 8.6 Hz, 1H), 6.59 (d, *J* = 8.4 Hz, 2H), 6.42 (d, *J* = 2.8 Hz, 1H), 6.15 (dd, *J* = 8.6, 2.8 Hz, 1H), 4.84 (q, *J* = 11.2 Hz, 2H), 4.33 – 4.20 (m, 1H), 4.19 – 4.08 (m, 1H), 3.81 (s, 3H), 3.68 (s, 3H), 3.04 – 2.89 (m, 1H), 2.35 – 2.24 (m, 1H), 2.06 – 1.93 (m, 2H), 1.90 – 1.75 (m, 4H), 1.33 – 1.24 (m, 1H); <sup>13</sup>C NMR (75 MHz, CDCl<sub>3</sub>) δ 158.1, 155.3, 147.9, 147.6, 140.9, 140.5, 138.6, 137.0, 134.3, 129.0, 128.3, 128.2, 127.8, 127.6, 124.2, 118.7 (q, *J* = 320.7 Hz), 117.8, 113.7, 112.3, 98.2, 98.0, 71.3, 58.8, 55.5, 55.3, 55.1, 36.0, 28.2, 21.8, 19.5; <sup>19</sup>F NMR (565 MHz, CDCl<sub>3</sub>) δ -73.0; HRMS (ESI) *m/z* 664.1945 (M+Na<sup>+</sup>), calc. for C<sub>34</sub>H<sub>34</sub>F<sub>3</sub>NO<sub>6</sub>SNa<sup>+</sup> 664.1951.

The ee was determined by HPLC analysis: CHIRALPAK IC (4.6 mm i.d. x 250 mm) - Lux i-Cellulose-5 (4.6 mm i.d. x 250 mm); Hexane/2-propanol = 95/5; flow rate: 1.0 mL/min; 25 °C; 210 nm; retention time: 15.3 min (major) and 17min (minor).

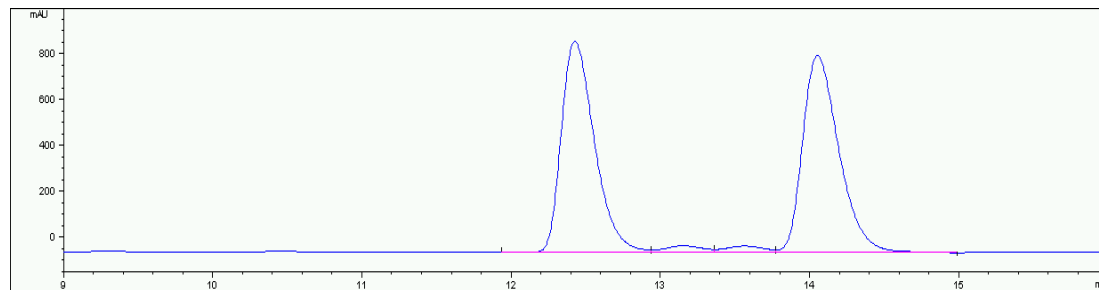

| Entry | Retention Time | Area    | Height | %Area  |
|-------|----------------|---------|--------|--------|
| 1     | 12.425         | 14209.6 | 920.9  | 47.749 |
| 2     | 13.149         | 503.8   | 29     | 1.693  |
| 3     | 13.56          | 494.2   | 28.2   | 1.661  |
| 4     | 14.051         | 14551.6 | 859.3  | 48.898 |

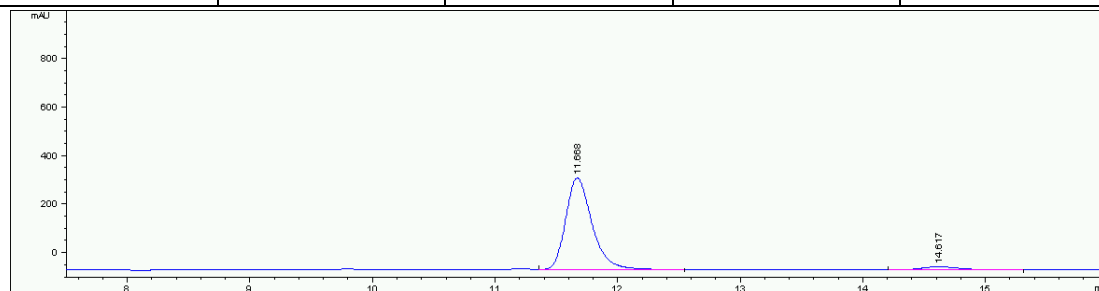

| Entry | Retention Time | Area   | Height | %Area  |
|-------|----------------|--------|--------|--------|
| 1     | 11.668         | 5740.3 | 378.9  | 95.015 |
| 2     | 14.617         | 301.2  | 13.2   | 4.985  |

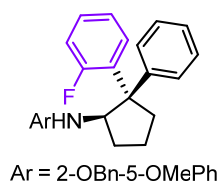

**13u**: white solid; Mp 80.6 - 81.8 °C; 15.4 mg, 61% yield; 91% ee; dr = 13:1;  $[\alpha]_D^{22}$  -26.3 (*c* 1.0, CHCl<sub>3</sub>); <sup>1</sup>H NMR (300 MHz, Methylene Chloride-*d*<sub>2</sub>) δ 7.52 – 7.44 (m, 1H), 7.36 – 7.26 (m, 4H), 7.19 – 7.03 (m, 8H), 6.96 – 6.86 (m, 1H), 6.76 – 6.63 (m, 1H), 6.47 – 6.31 (m, 1H), 6.17 – 6.05 (m, 1H), 4.88 – 4.73 (m, 2H), 4.41 – 4.23 (m, 1H), 4.08 (d, *J* = 9.5 Hz, 1H), 3.76 (s, 3H), 3.12 – 2.92 (m, 1H), 2.34 – 2.22 (m, 1H), 2.17 – 1.93 (m, 2H), 1.88 – 1.73 (m, 1H), 1.31 – 1.23 (m, 1H); <sup>13</sup>C NMR (75 MHz, CDCl<sub>3</sub>) δ 164.3, 161.0, 156.8, 144.6, 142.2, 140.1, 138.7, 137.8, 137.6, 129.9, 129.8, 129.7, 129.6, 129.4, 129.3, 129.2, 128.7, 128.0, 125.3, 125.3, 117.6, 117.3, 113.5, 99.6, 99.5, 72.5, 59.6, 56.9, 55.5, 55.4, 37.9, 37.8, 30.1, 21.2; <sup>19</sup>F NMR (565 MHz, CDCl<sub>3</sub>) δ -109.1, -109.4; HRMS (ESI) *m/z* 468.2329 (M+H<sup>+</sup>), calc. for C<sub>34</sub>H<sub>35</sub>F<sub>3</sub>NO<sub>6</sub>S<sup>+</sup> 4682333.

The ee was determined by HPLC analysis: Lux i-Amylose-3 (4.6 mm i.d. x 250 mm) -

CHIRALPAK IG (4.6 mm i.d. x 250 mm); Hexane/2-propanol = 97/3; flow rate: 1.0 mL/min; 25 °C; 210 nm; retention time: 19.2 min (minor) and 22.0 min (major).

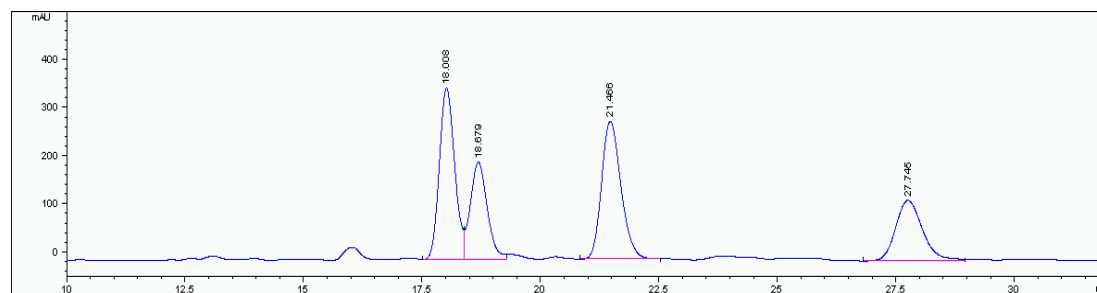

| Entry | Retention Time | Area   | Height | %Area  |
|-------|----------------|--------|--------|--------|
| 1     | 18.008         | 8040.7 | 356.8  | 30.643 |
| 2     | 18.679         | 5046.8 | 202.6  | 19.234 |
| 3     | 21.466         | 8127.4 | 286.2  | 30.974 |
| 4     | 27.745         | 5024.6 | 126.1  | 19.149 |

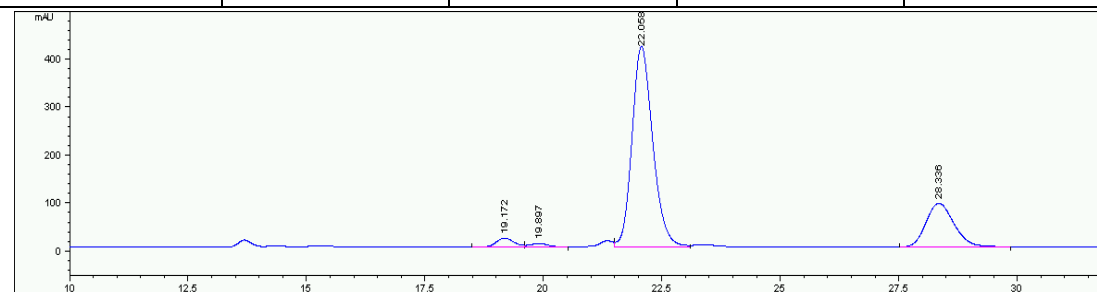

| Entry | Retention Time | Area    | Height | %Area  |
|-------|----------------|---------|--------|--------|
| 1     | 19.172         | 524.6   | 19.3   | 3.013  |
| 2     | 19.897         | 223.6   | 8      | 1.284  |
| 3     | 22.058         | 12862.7 | 419.4  | 73.877 |
| 4     | 28.336         | 3800.2  | 91.2   | 21.826 |

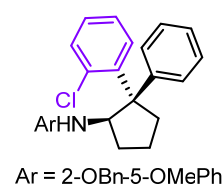

**13v**: white solid; Mp 164.7 - 166.1 °C; 25.6 mg, 53% yield; 72% ee; dr = 10:1;  $[\alpha]_D^{22}$  -26.2 (c 1.0, CHCl<sub>3</sub>); <sup>1</sup>H NMR (300 MHz, Methylene Chloride-d<sub>2</sub>) δ 7.51 (dd, *J* = 7.7, 1.7 Hz, 1H), 7.32 – 7.24 (m, 5H), 7.23 – 7.16 (m, 2H), 7.16 – 7.10 (m, 3H), 7.08 – 6.99 (m, 3H), 6.70 (d, *J* = 8.6 Hz, 1H), 6.41 (d, *J* = 2.8 Hz, 1H), 6.10 (dd, *J* = 8.6, 2.8 Hz, 1H), 4.88 – 4.68 (m, 2H), 4.40 – 4.26 (m, 1H), 4.07 (d, *J* = 9.9 Hz, 1H), 3.75 (s, 3H), 3.42 – 3.29 (m, 1H), 2.32 – 2.22 (m, 1H), 2.13 – 1.95 (m, 2H), 1.91 – 1.80 (m, 1H), 1.30 – 1.25 (m, 1H); <sup>13</sup>C NMR (75 MHz, CDCl<sub>3</sub>) δ 155.2, 146.1, 142.4, 140.8, 138.6, 137.0, 134.8, 131.2, 128.4, 128.3, 128.0, 127.7, 127.5, 126.5, 126.2, 112.0, 98.1, 97.7, 71.1, 58.4, 56.4, 55.5, 35.8, 28.2, 19.6; HRMS (ESI) *m/z* 506.1852 (M+Na<sup>+</sup>), calc. for C<sub>31</sub>H<sub>30</sub>ClNO<sub>2</sub>Na<sup>+</sup> 506.1857.

The ee was determined by HPLC analysis: CHIRAL MQ (x 2) (4.6 mm i.d. x 250 mm);

Hexane/2-propanol = 95/5; flow rate: 1.0 mL/min; 25 °C; 210 nm; retention time: 5.2 min (major) and 6.0 min (minor).

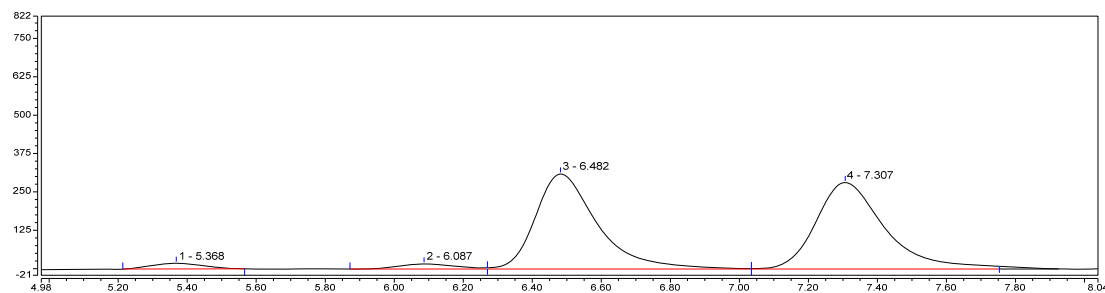

| Entry | Retention Time | Area    | Height | %Area |
|-------|----------------|---------|--------|-------|
| 1     | 5.368          | 3.1554  | 18.38  | 2.33  |
| 2     | 6.087          | 3.0896  | 16.28  | 2.29  |
| 3     | 6.482          | 64.1915 | 309.21 | 47.49 |
| 4     | 7.307          | 64.7347 | 281.27 | 47.89 |

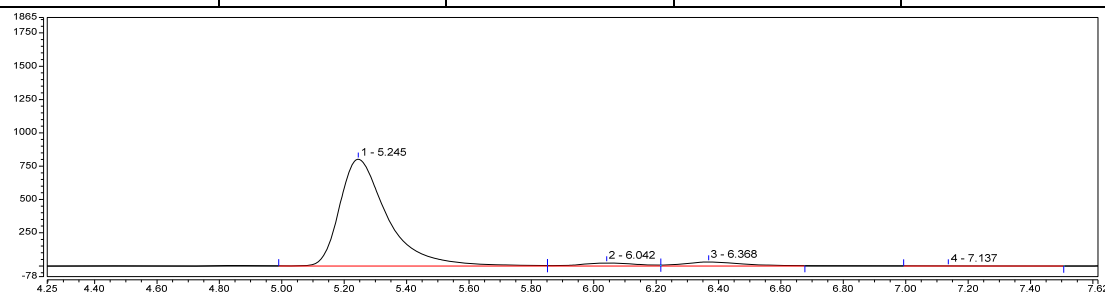

| Entry | Retention Time | Area     | Height | %Area |
|-------|----------------|----------|--------|-------|
| 1     | 5.245          | 142.5618 | 801.89 | 92.12 |
| 2     | 6.042          | 4.7773   | 23.73  | 3.09  |
| 3     | 6.368          | 6.9584   | 30.83  | 4.50  |
| 4     | 7.137          | 0.4646   | 1.53   | 0.30  |

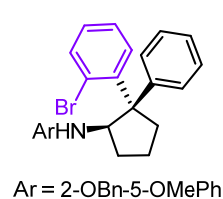

**13w**: white solid; Mp 123.6 - 124.8 °C; 28.4 mg, 54% yield; 89% ee; dr = 6:1;  $[\alpha]_D^{22}$  -8.0 (*c* 1.0, CHCl<sub>3</sub>); <sup>1</sup>H NMR (300 MHz, Chloroform-*d*) δ 7.66 - 7.43 (m, 2H), 7.39 - 7.24 (m, 5H), 7.19 - 7.10 (m, 4H), 7.08 - 6.99 (m, 3H), 6.72 (d, *J* = 8.6 Hz, 1H), 6.48 - 6.40 (m, 1H), 6.13 (dd, *J* = 8.6, 2.8 Hz, 1H), 4.90 - 4.75 (m, 2H), 4.42 - 4.29 (m, 1H), 4.17 (s, 1H), 3.81 (d, *J* = 1.8 Hz, 3H), 3.64 - 3.35 (m, 1H), 2.38 - 2.28 (m, 1H), 2.15 - 1.97 (m, 2H), 1.97 - 1.75 (m, 1H), 1.43 - 1.28 (m, 1H); <sup>13</sup>C NMR (75 MHz, CDCl<sub>3</sub>) δ 155.2, 148.7, 147.7, 144.4, 142.4, 140.8, 140.8, 138.6, 137.2, 137.0, 135.0, 128.9, 128.8, 128.4, 128.4, 128.2, 128.1, 128.0, 127.8, 127.7, 127.6, 127.2, 127.2, 126.3, 125.9, 124.9, 112.0, 112.0, 98.2, 97.6, 71.1, 71.0, 58.6, 58.5, 57.5, 57.4, 55.5, 37.8, 36.0, 29.7, 28.3, 20.2, 19.7; HRMS (ESI) *m/z* 528.1526 (M+H<sup>+</sup>), calc. for C<sub>31</sub>H<sub>31</sub>BrNO<sub>2</sub><sup>+</sup> 528.1533.

The ee was determined by HPLC analysis: CHIRAL INA (x 2) (4.6 mm i.d. x 250 mm); Hexane/2-propanol = 98/2; flow rate: 1.0 mL/min; 25 °C; 210 nm; retention time: 13.7 min (minor) and 15.1 min (major).

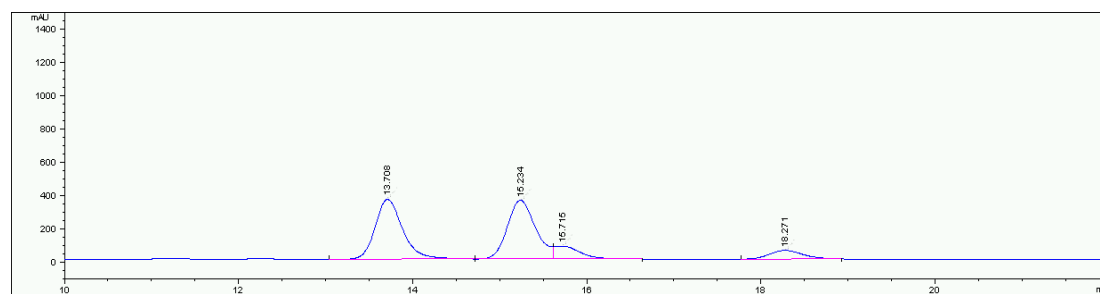

| Entry | Retention Time | Area   | Height | %Area  |
|-------|----------------|--------|--------|--------|
| 1     | 13.708         | 8053.4 | 361.3  | 42.147 |
| 2     | 15.234         | 8025.8 | 353.8  | 42.002 |
| 3     | 15.715         | 1541.1 | 77.9   | 8.065  |
| 4     | 18.271         | 1487.9 | 53.5   | 7.787  |

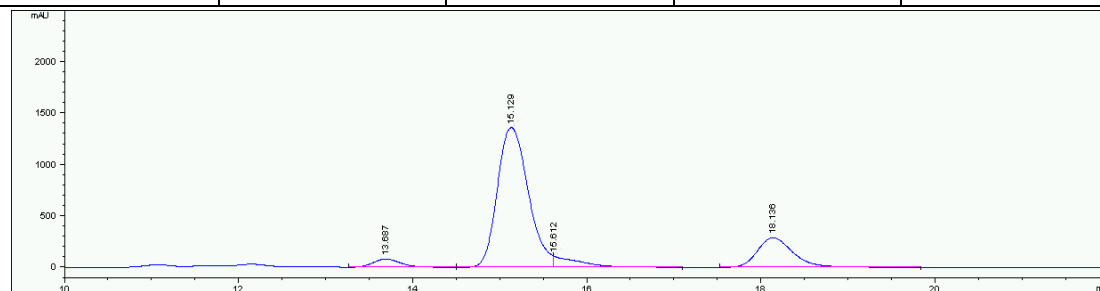

| Entry | Retention Time | Area    | Height | %Area  |
|-------|----------------|---------|--------|--------|
| 1     | 13.687         | 1932.7  | 82.6   | 4.186  |
| 2     | 15.129         | 33604.9 | 1359.3 | 72.782 |
| 3     | 15.612         | 2337.9  | 113.4  | 5.064  |
| 4     | 18.136         | 8296.2  | 288.4  | 17.968 |

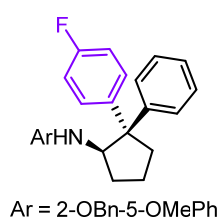

**13x**: yellow oil; 31.3 mg, 67% yield; 91% ee; dr = 3:1;  $[\alpha]_D^{22}$  -8.7 (*c* 1.0, CHCl<sub>3</sub>); <sup>1</sup>H NMR (300 MHz, Chloroform-*d*) δ 7.44 – 7.34 (m, 3H), 7.34 – 7.23 (m, 4H), 7.23 – 7.06 (m, 5H), 7.03 – 6.68 (m, 3H), 6.46 (t, *J* = 2.5 Hz, 1H), 6.19 (dd, *J* = 8.6, 3.1 Hz, 1H), 4.96 – 4.78 (m, 2H), 4.47 – 4.32 (m, 1H), 4.19 (s, 1H), 3.85 (d, *J* = 1.7 Hz, 3H), 2.83 – 2.66 (m, 1H), 2.43 – 2.19 (m, 2H), 2.09 – 1.94 (m, 1H), 1.89 – 1.74 (m, 1H), 1.58 – 1.44 (m, 1H); <sup>13</sup>C NMR (75 MHz, CDCl<sub>3</sub>) δ 161.2 (d, *J* = 245.5 Hz), 155.1, 148.4, 140.9, 140.1 (d, *J* = 3.3 Hz), 138.7, 137.0, 130.3 (d, *J* = 7.8 Hz), 128.7, 128.4, 128.2, 127.5, 127.1, 125.9, 114.8 (d, *J* = 20.9 Hz), 111.8, 98.2, 97.9, 71.0, 58.5, 56.9, 55.5, 38.0, 29.8, 20.0; <sup>19</sup>F NMR (565 MHz, CDCl<sub>3</sub>) δ -116.4, -117.2; HRMS (ESI) *m/z* 468.2325 (M+H<sup>+</sup>), calc. for C<sub>34</sub>H<sub>35</sub>F<sub>3</sub>NO<sub>6</sub>S<sup>+</sup> 468.2333.

The ee was determined by HPLC analysis: Lux i-Amylose-3 (4.6 mm i.d. x 250 mm) - CHIRALPAK IG (4.6 mm i.d. x 250 mm); Hexane/2-propanol = 97/3; flow rate: 1.0 mL/min; 25 °C; 210 nm; retention time: 19.2 min (minor) and 22.0 min (major).

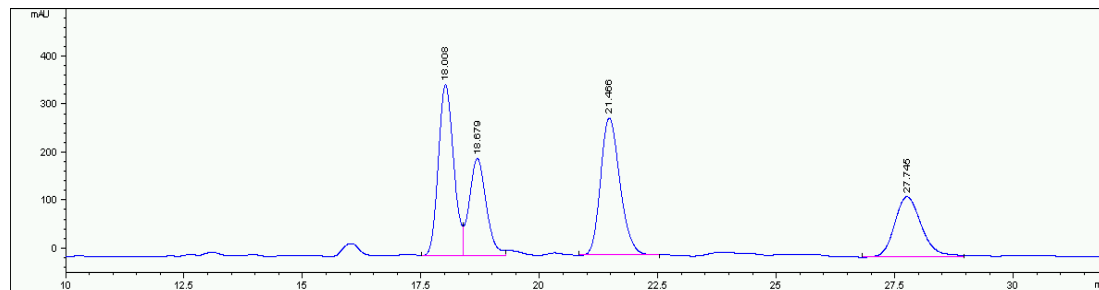

| Entry | Retention Time | Area   | Height | %Area  |
|-------|----------------|--------|--------|--------|
| 1     | 18.008         | 8040.7 | 356.8  | 30.643 |
| 2     | 18.679         | 5046.8 | 202.6  | 19.234 |
| 3     | 21.466         | 8127.4 | 286.2  | 30.974 |
| 4     | 27.745         | 5024.6 | 126.1  | 19.149 |

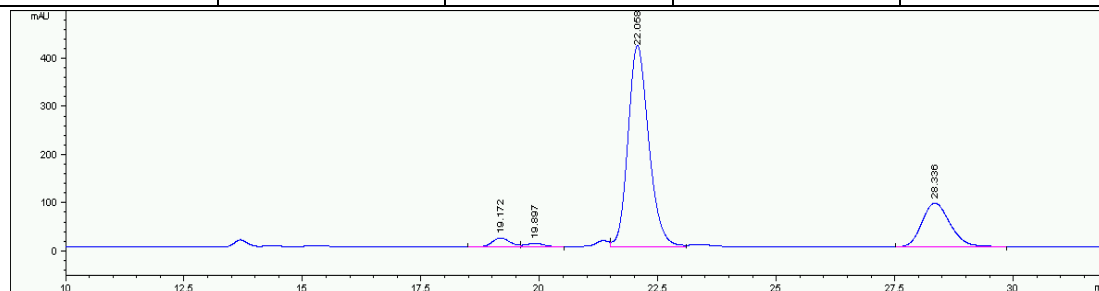

| Entry | Retention Time | Area    | Height | %Area  |
|-------|----------------|---------|--------|--------|
| 1     | 19.172         | 524.6   | 19.3   | 3.013  |
| 2     | 19.897         | 223.6   | 8      | 1.284  |
| 3     | 22.058         | 12862.7 | 419.4  | 73.877 |
| 4     | 28.336         | 3800.2  | 91.2   | 21.826 |

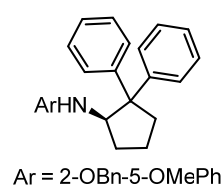

**13y**: white solid; Mp 154.6 - 156.2 °C; 16.2 mg, 36% yield; 88% ee;  $[\alpha]_D^{22}$  -9.9 (*c* 1.0, CHCl<sub>3</sub>); <sup>1</sup>H NMR (300 MHz, Chloroform-*d*) δ 7.36 – 7.27 (m, 5H), 7.19 – 7.02 (m, 7H), 6.95 (dd, *J* = 6.8, 3.0 Hz, 1H), 6.73 (d, *J* = 8.6 Hz, 1H), 6.41 (d, *J* = 2.8 Hz, 1H), 6.14 (dd, *J* = 8.6, 2.8 Hz, 1H), 4.95 – 4.74 (m, 2H), 4.27 (s, 1H), 4.15 – 4.02 (m, 1H), 3.82 (d, *J* = 4.9 Hz, 6H), 3.35 – 3.22 (m, 1H), 2.38 – 3.25 (m, 1H), 2.17 – 2.03 (m, 2H), 1.96 – 1.82 (m, 1H), 1.60 – 1.49 (m, 1H); <sup>13</sup>C NMR (75 MHz, CDCl<sub>3</sub>) δ 155.2, 150.8, 143.4, 141.1, 140.8, 138.4, 138.3, 136.9, 128.4, 128.3, 128.1, 127.7, 127.7, 126.9, 120.3, 112.0, 111.3, 98.2, 97.8, 71.1, 59.1, 55.5, 55.5, 54.4, 36.2, 28.2, 19.7; HRMS (ESI) *m/z* 450.2426 (M+H<sup>+</sup>), calc. for C<sub>31</sub>H<sub>32</sub>NO<sub>2</sub><sup>+</sup> 450.2428.

The ee was determined by HPLC analysis: CHIRALPAK IG (4.6 mm i.d. x 250 mm);

Hexane/2-propanol = 95/5; flow rate: 1.0 mL/min; 25 °C; 210 nm; retention time: 8.4 min (minor) and 10.8 min (major).

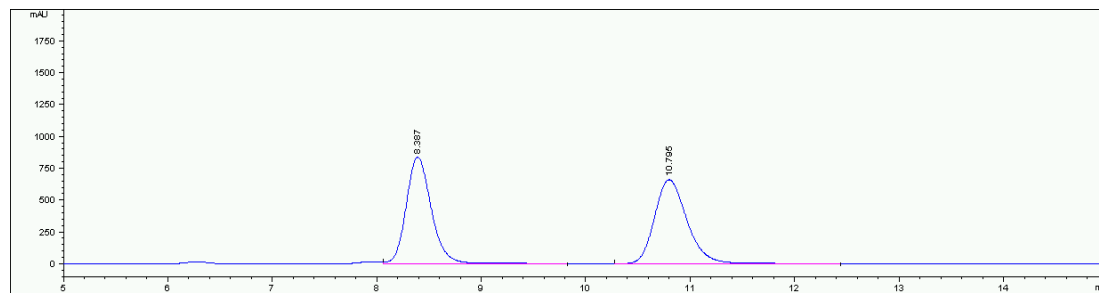

| Entry | Retention Time | Area    | Height | %Area  |
|-------|----------------|---------|--------|--------|
| 1     | 8.387          | 14428.3 | 840    | 49.598 |
| 2     | 10.795         | 14662.3 | 662.8  | 50.402 |

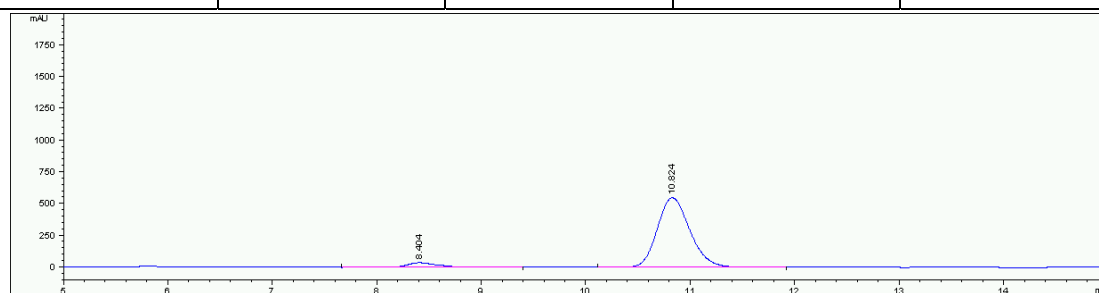

| Entry | Retention Time | Area    | Height | %Area  |
|-------|----------------|---------|--------|--------|
| 1     | 8.404          | 792.7   | 37.1   | 6.229  |
| 2     | 10.824         | 11933.1 | 549.1  | 93.771 |

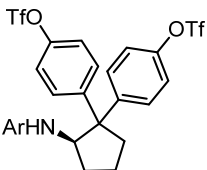
**13z**: white solid; Mp 53.5 - 54.7 °C; 59.6 mg, 80% yield; 95% ee;  $[\alpha]_D^{22}$  -34.6 (*c* 1.0, CHCl<sub>3</sub>); <sup>1</sup>H NMR (300 MHz, Chloroform-*d*) δ 7.39 – 7.29 (m, 4H), 7.28 (d, *J* = 2.3 Hz, 1H), 7.23 – 7.14 (m, 4H), 7.13 – 6.99 (m, 2H), 6.94 – 6.81 (m, 2H), 6.75 (d, *J* = 8.7 Hz, 1H), 6.38 (d, *J* = 2.8 Hz, 1H), 6.18 (dd, *J* = 8.6, 2.8 Hz, 1H), 4.93 – 4.75 (m, 2H), 4.31 (q, *J* = 9.0 Hz, 1H), 3.93 (d, *J* = 9.5 Hz, 1H), 3.80 (s, 3H), 2.82 – 2.63 (m 1H), 2.39 – 2.15 (m, 2H), 2.05 – 1.78 (m, 2H), 1.36 – 1.27 (m, 1H); <sup>13</sup>C NMR (75 MHz, CDCl<sub>3</sub>) δ 155.1, 148.6, 148.0, 147.8, 143.7, 140.9, 138.0, 136.8, 130.5, 129.2, 128.5, 128.2, 128.0, 121.2, 120.9, 118.7 (q, *J* = 320.8 Hz), 118.6 (q, *J* = 320.7 Hz), 111.7, 98.4, 98.3, 71.2, 58.3, 56.3, 55.5, 38.0, 29.4, 19.6; <sup>19</sup>F NMR (376 MHz, CDCl<sub>3</sub>) δ -72.9, -73.0; HRMS (ESI) *m/z* 746.1298 (M+H<sup>+</sup>), calc. for C<sub>34</sub>H<sub>30</sub>F<sub>6</sub>NO<sub>8</sub>S<sup>+</sup> 746.1312.

The ee was determined by HPLC analysis: CHIRALCEL OD-H (4.6 mm i.d. x 250 mm); Hexane/2-propanol = 90/10; flow rate: 1.0 mL/min; 25 °C; 210 nm; retention time: 6.6 min (minor) and 8.5 min (major).

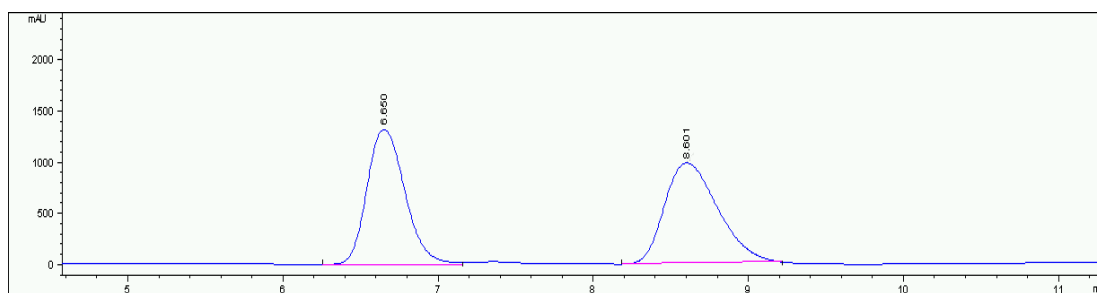

| Entry | Retention Time | Area    | Height | %Area  |
|-------|----------------|---------|--------|--------|
| 1     | 6.65           | 22759.2 | 1322.6 | 49.275 |
| 2     | 8.601          | 23429   | 982.9  | 50.725 |

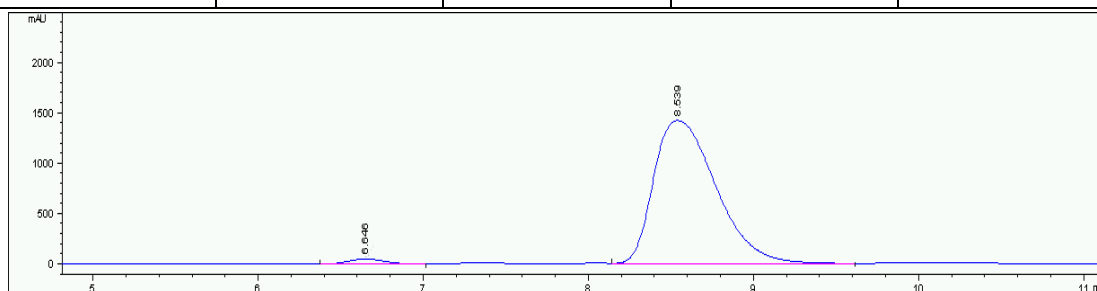

| Entry | Retention Time | Area  | Height | %Area  |
|-------|----------------|-------|--------|--------|
| 1     | 6.646          | 927.4 | 55     | 2.379  |
| 2     | 8.539          | 38063 | 1429.9 | 97.621 |

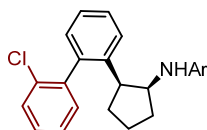

Ar = 2-OCH<sub>2</sub>-(2,6-Me<sub>2</sub>-Ph)-5-OMePh

**15**: yellow oil; 43.4 mg, 85% yield; 80% ee; dr = 6:1;  $[\alpha]_D^{22} +15.6$  (*c* 1.0, CHCl<sub>3</sub>); <sup>1</sup>H NMR (300 MHz, CDCl<sub>3</sub>) δ 7.41 (d, *J* = 7.4 Hz, 1H), 7.26 – 7.14 (m, 4H), 7.13 – 7.02 (m, 3H), 7.00 – 6.78 (m, 3H), 6.70 (d, *J* = 8.7 Hz, 1H), 6.18 – 5.92 (m, 2H), 4.83 (q, *J* = 10.1 Hz, 2H), 3.72 (d, *J* = 4.1 Hz, 3H), 3.37 – 3.24 (m, 1H), 3.16 – 3.00 (m, 1H), 2.23 (d, *J* = 5.8 Hz, 6H), 2.07 – 1.89 (m, 3H), 1.77 – 1.57 (m, 2H); <sup>13</sup>C NMR (75 MHz, CDCl<sub>3</sub>) δ 154.7, 141.0, 140.4, 139.8, 138.4, 138.2, 133.3, 133.0, 131.7, 129.4, 128.9, 128.5, 128.2, 128.1, 128.1, 127.8, 127.0, 126.5, 126.2, 110.6, 97.8, 97.2, 65.2, 55.6, 55.4, 45.7, 33.3, 30.4, 23.2, 19.5; HRMS (ESI) *m/z* 512.2343 (M+H<sup>+</sup>), calc. for C<sub>33</sub>H<sub>35</sub>ClNO<sub>2</sub><sup>+</sup> 512.2351.

The ee was determined by HPLC analysis: Lux Cellulose-1 (4.6 mm i.d. x 250 mm); Hexane/2-propanol = 98/2; flow rate: 1.0 mL/min; 25 °C; 210 nm; retention time: 6.6 min (minor) and 8.5 min (major).



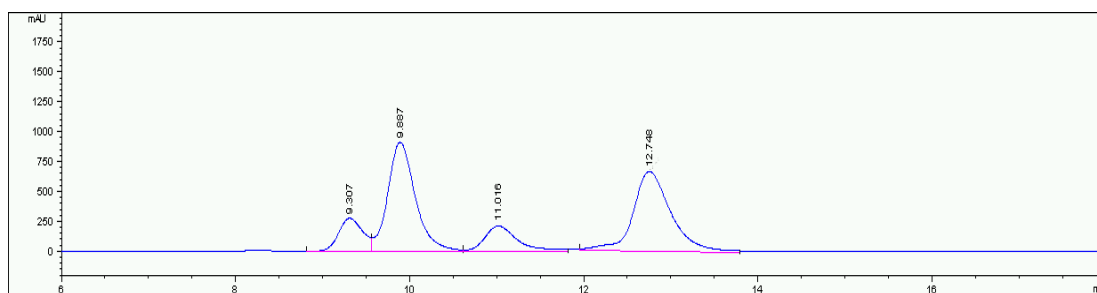

| Entry | Retention Time | Area    | Height | %Area  |
|-------|----------------|---------|--------|--------|
| 1     | 9.307          | 5770    | 284.8  | 10.793 |
| 2     | 9.887          | 20597.4 | 919.7  | 38.528 |
| 3     | 11.016         | 6197    | 220.3  | 11.592 |
| 4     | 12.748         | 20896.7 | 673.6  | 39.088 |

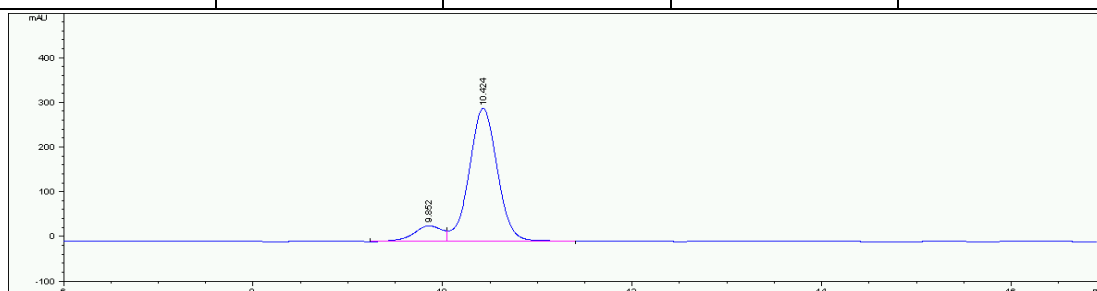

| Entry | Retention Time | Area   | Height | %Area  |
|-------|----------------|--------|--------|--------|
| 1     | 9.852          | 771.5  | 35.7   | 11.014 |
| 2     | 10.424         | 6233.2 | 298.7  | 88.986 |

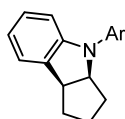

Ar = 2-OCH<sub>2</sub>(2,6-Me<sub>2</sub>-Ph)-5-OMePh

**16**: yellow oil; 34.3 mg, 86% yield; 84% ee;  $[\alpha]_D^{22} +21.4$  (c 1.0, CHCl<sub>3</sub>); <sup>1</sup>H NMR (300 MHz, CDCl<sub>3</sub>) δ 7.28 – 7.06 (m, 7H), 6.87 – 6.61 (m, 3H), 5.17 – 4.90 (m, 3H), 3.87 (s, 3H), 3.85 – 3.74 (m, 1H), 2.43 (s, 6H), 3.16 – 1.78 (m, 3H), 1.74 – 1.50 (m, 3H); <sup>13</sup>C NMR (75 MHz, CDCl<sub>3</sub>) δ 154.4, 149.4, 148.4, 138.0, 134.1, 133.6, 133.1, 128.2, 128.0, 127.0, 124.4, 117.5, 116.9, 111.6, 109.6, 107.3, 68.1, 66.6, 55.5, 45.7, 35.4, 32.9, 24.0, 19.4; HRMS (ESI) m/z 400.2263 (M+H<sup>+</sup>), calc. for C<sub>27</sub>H<sub>30</sub>NO<sub>2</sub><sup>+</sup> 400.2271.

The ee was determined by HPLC analysis: Lux Cellulose-1 (4.6 mm i.d. x 250 mm); Hexane/2-propanol = 98/2; flow rate: 1.0 mL/min; 25 °C; 210 nm; retention time: 6.6 min (major) and 8.5 min (minor).

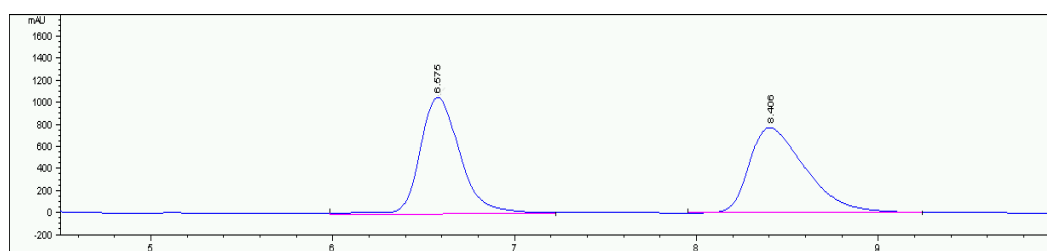

| Entry | Retention Time | Area | Height | %Area |
|-------|----------------|------|--------|-------|
|-------|----------------|------|--------|-------|

|   |       |         |        |        |
|---|-------|---------|--------|--------|
| 1 | 6.575 | 16909.9 | 1069.8 | 50.090 |
| 2 | 8.406 | 16849.3 | 774.1  | 49.910 |

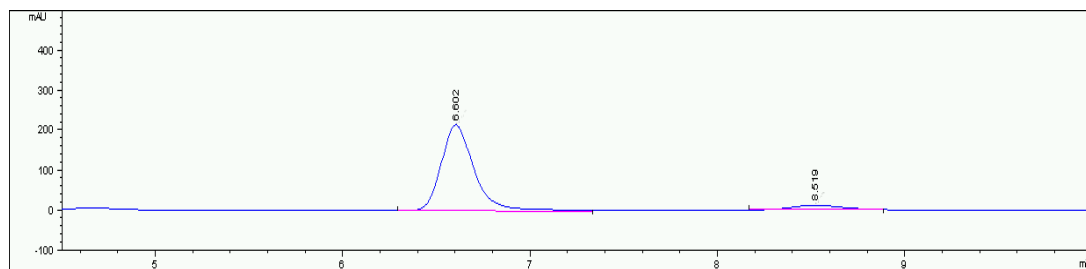

| Entry | Retention Time | Area   | Height | %Area  |
|-------|----------------|--------|--------|--------|
| 1     | 6.602          | 2743.6 | 216.4  | 91.898 |
| 2     | 8.519          | 241.9  | 11.8   | 8.102  |

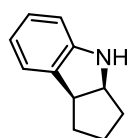

**17**: yellow oil; 40.7 mg, 64% yield; 84% ee; dr > 19:1;  $[\alpha]_D^{22} +16.1$  (*c* 1.0, CHCl<sub>3</sub>); <sup>1</sup>H NMR (300 MHz, CDCl<sub>3</sub>) δ 7.10 – 6.95 (m, 2H), 6.69 (t, *J* = 7.3 Hz, 1H), 6.55 (d, *J* = 7.8 Hz, 1H), 4.41 – 4.33 (m, 1H), 3.84 – 3.74 (m, 1H), 3.39 (s, 1H), 2.02 – 1.90 (m, 1H), 1.81 – 1.52 (m, 5H); <sup>13</sup>C NMR (75 MHz, CDCl<sub>3</sub>) δ 151.1, 133.4, 127.3, 124.5, 118.4, 108.6, 63.3, 47.2, 36.8, 34.8, 24.4; HRMS (ESI) *m/z* 160.1119 (M+H<sup>+</sup>), calc. for C<sub>11</sub>H<sub>14</sub>N<sup>+</sup> 160.1121.

The ee was determined by HPLC analysis: Lux Amylose-1 (4.6 mm i.d. x 250 mm); Hexane/2-propanol = 95/5; flow rate: 1.0 mL/min; 25 °C; 210 nm; retention time: 6.3 min (major) and 7.2 min (minor).

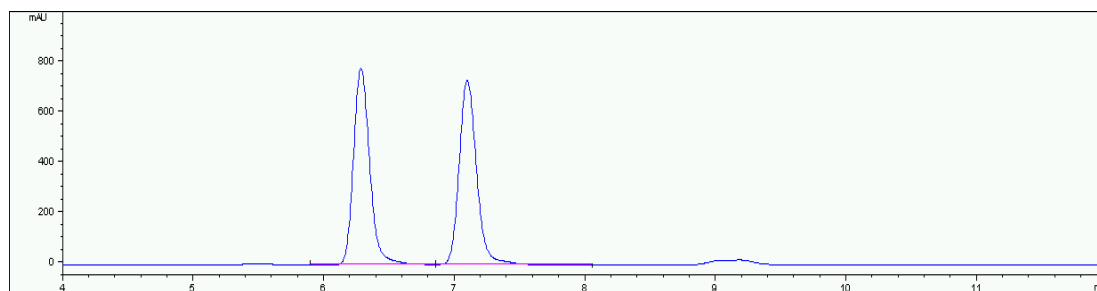

| Entry | Retention Time | Area   | Height | %Area  |
|-------|----------------|--------|--------|--------|
| 1     | 6.283          | 6809.8 | 784.1  | 49.705 |
| 2     | 7.097          | 6890.7 | 735.1  | 50.295 |

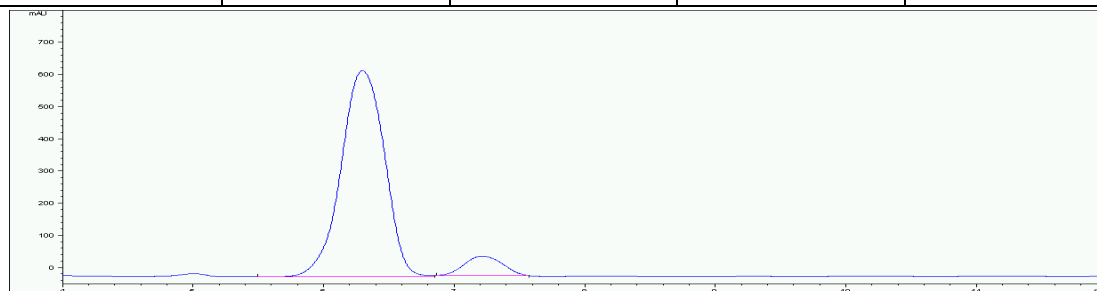

| Entry | Retention Time | Area | Height | %Area |
|-------|----------------|------|--------|-------|
|-------|----------------|------|--------|-------|

|   |       |         |       |        |
|---|-------|---------|-------|--------|
| 1 | 6.294 | 14932.2 | 641.9 | 92.025 |
| 2 | 7.213 | 1294.1  | 62.1  | 7.975  |

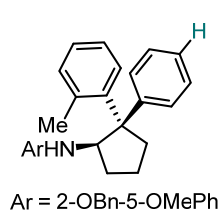

**18**: yellow oil; 36.3 mg, 78% yield; 94% ee; dr > 19:1;  $[\alpha]_D^{22}$  -13.7 (*c* 1.0, CHCl<sub>3</sub>); <sup>1</sup>H NMR (300 MHz, CDCl<sub>3</sub>) δ 7.55 – 7.46 (m, 1H), 7.40 – 7.26 (m, 4H), 7.23 – 7.16 (m, 4H), 7.13 – 7.00 (m, 5H), 6.74 (d, *J* = 8.6 Hz, 1H), 6.48 (d, *J* = 2.8 Hz, 1H), 6.15 (dd, *J* = 8.6, 2.8 Hz, 1H), 4.84 (q, *J* = 11.2 Hz, 2H), 4.47 – 4.34 (m, 1H), 4.20 (s, 1H), 3.84 (s, 3H), 3.16 – 3.01 (m, 1H), 2.41 – 2.28 (m, 1H), 2.17 – 1.99 (m, 2H), 1.91 – 1.80 (m, 4H), 1.44 – 1.33 (m, 1H); <sup>13</sup>C NMR (75 MHz, CDCl<sub>3</sub>) δ 155.1, 147.1, 143.4, 140.7, 138.7, 137.2, 137.0, 132.0, 128.3, 128.0, 127.7, 127.6, 126.4, 126.2, 126.2, 125.6, 111.8, 98.0, 97.4, 71.0, 58.5, 56.3, 55.4, 36.3, 28.2, 21.7, 19.7; HRMS (ESI) *m/z* 464.2578 (M+H<sup>+</sup>), calc. for C<sub>32</sub>H<sub>34</sub>NO<sub>2</sub><sup>+</sup> 464.2584.

The ee was determined by HPLC analysis: Lux i-Amylose-3 (4.6 mm i.d. x 250 mm); Hexane/2-propanol = 98/2; flow rate: 1.0 mL/min; 25 °C; 210 nm; retention time: 9.6 min (minor) and 11.1 min (major).

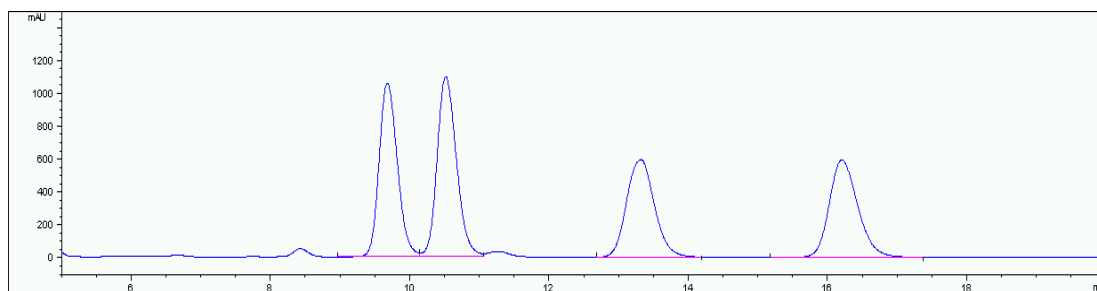

| Entry | Retention Time | Area    | Height | %Area  |
|-------|----------------|---------|--------|--------|
| 1     | 9.674          | 19401.8 | 1056.9 | 26.116 |
| 2     | 10.513         | 21339.5 | 1097.8 | 28.724 |
| 3     | 13.316         | 16570.6 | 595    | 22.305 |
| 4     | 16.201         | 16979.8 | 593.1  | 22.856 |

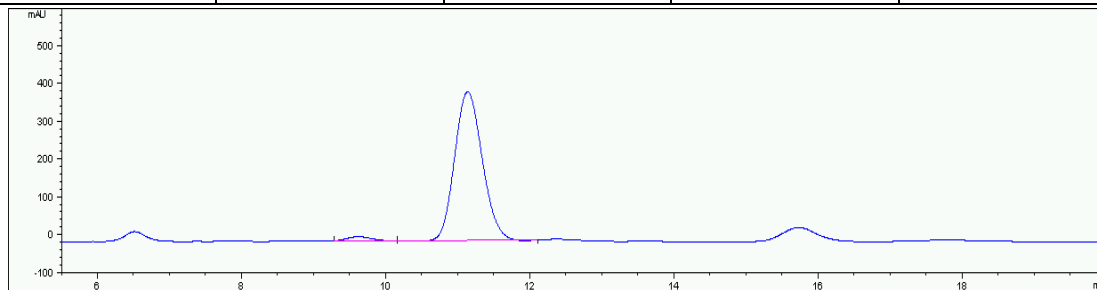

| Entry | Retention Time | Area    | Height | %Area  |
|-------|----------------|---------|--------|--------|
| 1     | 9.615          | 313.9   | 12.3   | 2.876  |
| 2     | 11.133         | 10599.1 | 395.6  | 97.124 |

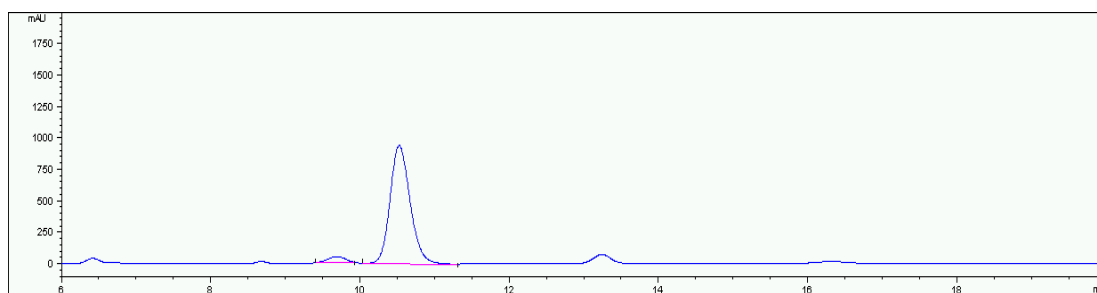

| Entry | Retention Time | Area  | Height | %Area  |
|-------|----------------|-------|--------|--------|
| 1     | 9.688          | 913.4 | 52.2   | 4.874  |
| 2     | 10.521         | 17828 | 942.8  | 95.126 |

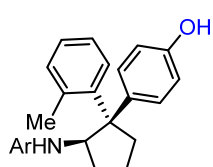

**19**: white solid; Mp 73.7 - 74.9 °C; 27.8 mg, 58% yield; 94% ee; dr > 19:1;  $[\alpha]_D^{22} +18.4$  (*c* 1.0, CHCl<sub>3</sub>); <sup>1</sup>H NMR (300 MHz, CD<sub>2</sub>Cl<sub>2</sub>) δ 7.41 – 7.36 (m, 1H), 7.35 – 7.25 (m, 3H), 7.20 – 7.14 (m, 2H), 7.12 – 7.06 (m, 2H), 7.06 – 7.00 (m, 1H), 6.85 (d, *J* = 7.5 Hz, 2H), 6.69 (d, *J* = 8.6 Hz, 1H), 6.46 (d, *J* = 8.0 Hz, 2H), 6.41 (d, *J* = 2.8 Hz, 1H), 6.09 (dd, *J* = 8.6, 2.8 Hz, 1H), 4.94 – 4.72 (m, 3H), 4.38 – 4.23 (m, 1H), 4.09 (d, *J* = 9.6 Hz, 1H), 3.75 (s, 3H), 3.03 – 2.89 (m, 1H), 2.31 – 2.18 (m, 1H), 2.10 – 1.91 (m, 2H), 1.88 – 1.72 (m, 4H), 1.29 – 1.20 (m, 1H); <sup>13</sup>C NMR (75 MHz, CD<sub>2</sub>Cl<sub>2</sub>) δ 155.0, 153.7, 147.0, 140.2, 138.4, 136.9, 135.2, 131.6, 129.0, 127.9, 127.4, 127.2, 125.8, 125.7, 125.0, 114.4, 111.7, 97.6, 97.5, 70.7, 58.1, 55.4, 55.0, 36.1, 28.04, 21.06, 19.2; HRMS (ESI) *m/z* 480.2525 (M+H<sup>+</sup>), calc. for C<sub>32</sub>H<sub>34</sub>NO<sub>3</sub><sup>+</sup> 480.2533.

The ee was determined by HPLC analysis: Lux Amylose-1 (4.6 mm i.d. x 250 mm); Hexane/2-propanol = 85/15; flow rate: 1.0 mL/min; 25 °C; 210 nm; retention time: 6.6 min (minor) and 9.4 min (major).

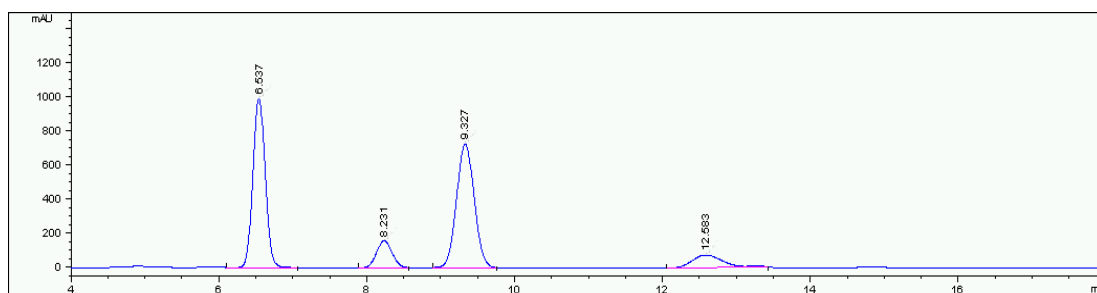

| Entry | Retention Time | Area    | Height | %Area  |
|-------|----------------|---------|--------|--------|
| 1     | 6.537          | 11733.2 | 996.7  | 40.951 |
| 2     | 8.231          | 2509.3  | 163.2  | 8.758  |
| 3     | 9.327          | 12263.5 | 729.4  | 42.802 |
| 4     | 12.583         | 2145.5  | 74.6   | 7.488  |

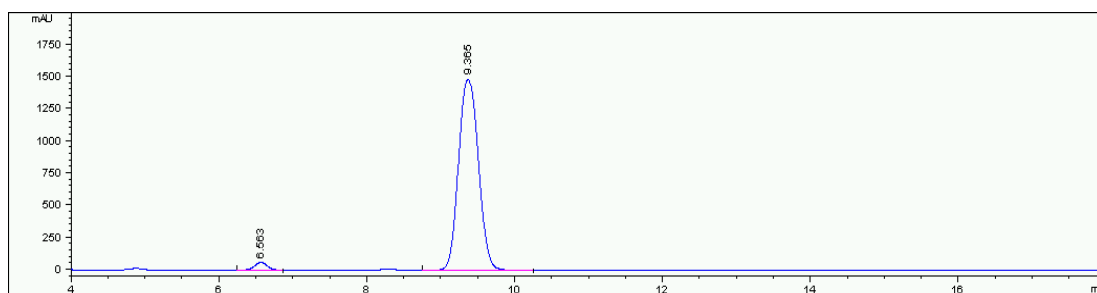

| Entry | Retention Time | Area    | Height | %Area  |
|-------|----------------|---------|--------|--------|
| 1     | 6.563          | 795.3   | 61.6   | 2.773  |
| 2     | 9.365          | 27881.3 | 1485.6 | 97.227 |

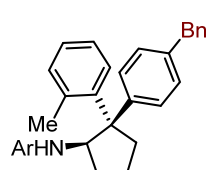

**20**: white solid; Mp 86.4 - 87.5 °C; 50.3 mg, 91% yield; 94% ee; dr > 19:1;  $[\alpha]_D^{22} +31.4$  (*c* 1.0, CHCl<sub>3</sub>); <sup>1</sup>H NMR (300 MHz, CDCl<sub>3</sub>) δ 7.53 – 7.46 (m, 1H), 7.39 – 7.27 (m, 6H), 7.25 – 7.15 (m, 6H), 7.13 – 7.07 (m, 1H), 7.06 – 6.96 (m, 2H), 6.95 – 6.86 (m, 2H), 6.76 (d, *J* = 8.6 Hz, 1H), 6.48 (d, *J* = 2.7 Hz, 1H), 6.17 (dd, *J* = 8.6, 2.7 Hz, 1H), 4.86 (q, *J* = 11.3 Hz, 2H), 4.44 – 4.25 (m, 2H), 3.90 (s, 2H), 3.86 (s, 3H), 3.12 – 3.00 (m, 1H), 2.43 – 2.27 (m, 1H), 2.16 – 1.98 (m, 2H), 1.92 – 1.82 (m, 4H), 1.47 – 1.37 (m, 1H); <sup>13</sup>C NMR (75 MHz, CDCl<sub>3</sub>) δ 155.2, 147.1, 141.2, 141.0, 140.7, 138.8, 138.8, 137.2, 137.1, 132.0, 128.9, 128.6, 128.3, 128.3, 128.2, 127.8, 127.7, 126.4, 126.1, 126.0, 125.6, 112.2, 98.0, 97.4, 71.2, 58.5, 56.0, 55.4, 41.2, 36.2, 28.2, 21.8, 19.7; HRMS (ESI) *m/z* 554.3041 (M+H<sup>+</sup>), calc. for C<sub>39</sub>H<sub>40</sub>NO<sub>2</sub><sup>+</sup> 554.3054.

The ee was determined by HPLC analysis: Lux Cellulose-1 (4.6 mm i.d. x 250 mm); Hexane/2-propanol = 95/5; flow rate: 1.0 mL/min; 25 °C; 210 nm; retention time: 11.7 min (minor) and 20.7 min (major).

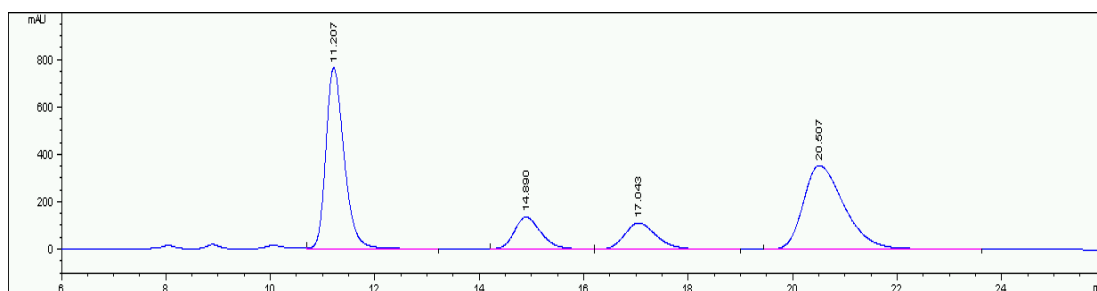

| Entry | Retention Time | Area    | Height | %Area  |
|-------|----------------|---------|--------|--------|
| 1     | 11.207         | 19160.8 | 766.3  | 39.167 |
| 2     | 14.89          | 5100.3  | 138.1  | 10.426 |
| 3     | 17.043         | 4984.5  | 113.2  | 10.189 |
| 4     | 20.507         | 19675   | 355.9  | 40.218 |

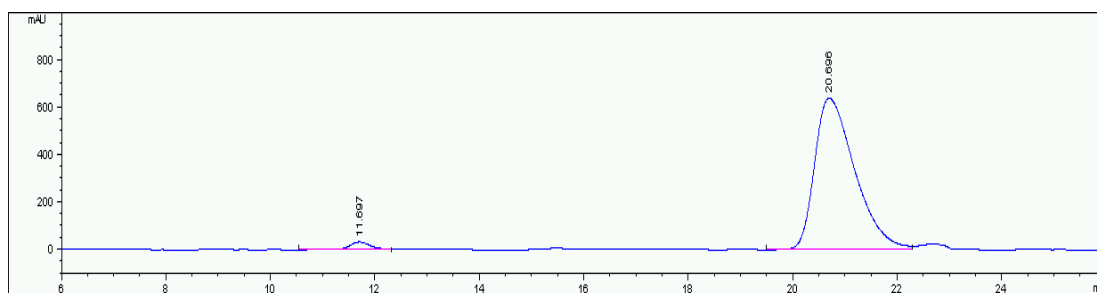

| Entry | Retention Time | Area    | Height | %Area  |
|-------|----------------|---------|--------|--------|
| 1     | 11.697         | 993.5   | 33.3   | 2.809  |
| 2     | 20.696         | 34367.5 | 640    | 97.191 |

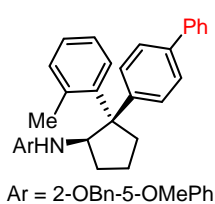

**21**: white solid; Mp 113.5 - 114.8 °C; 46.9 mg, 87% yield; 94% ee; dr > 19:1;  $[\alpha]_D^{22} +13.9$  (*c* 1.0, CHCl<sub>3</sub>); <sup>1</sup>H NMR (300 MHz, CDCl<sub>3</sub>) δ 7.53 – 7.33 (m, 7H), 7.25 – 7.21 (m, 1H), 7.19 – 7.04 (m, 10H), 6.73 (d, *J* = 8.6 Hz, 1H), 6.49 (d, *J* = 2.7 Hz, 1H), 6.14 (dd, *J* = 8.6, 2.7 Hz, 1H), 4.80 (q, *J* = 11.0 Hz, 2H), 4.42 – 4.35 (m, 1H), 3.82 (s, 3H), 3.16 – 3.03 (m, 1H), 2.39 – 2.30 (m, 1H), 2.15 – 2.01 (m, 2H), 1.89 – 1.80 (m, 4H), 1.42 – 1.34 (m, 1H). <sup>13</sup>C NMR (75 MHz, CDCl<sub>3</sub>) δ 155.2, 146.9, 142.5, 140.9, 140.5, 138.8, 138.5, 137.2, 136.8, 132.1, 128.6, 128.5, 128.2, 127.8, 127.8, 127.1, 127.0, 126.7, 126.4, 126.3, 125.6, 112.0, 98.3, 97.9, 71.2, 58.8, 56.2, 55.5, 36.1, 28.3, 21.8, 19.8; HRMS (ESI) *m/z* 540.2888 (M+H<sup>+</sup>), calc. for C<sub>38</sub>H<sub>38</sub>NO<sub>2</sub><sup>+</sup> 540.2897.

The ee was determined by HPLC analysis: Lux Amylose-1 (4.6 mm i.d. x 250 mm); Hexane/2-propanol = 98/2; flow rate: 1.0 mL/min; 25 °C; 210 nm; retention time: 6.1 min (major) and 6.7 min (minor).

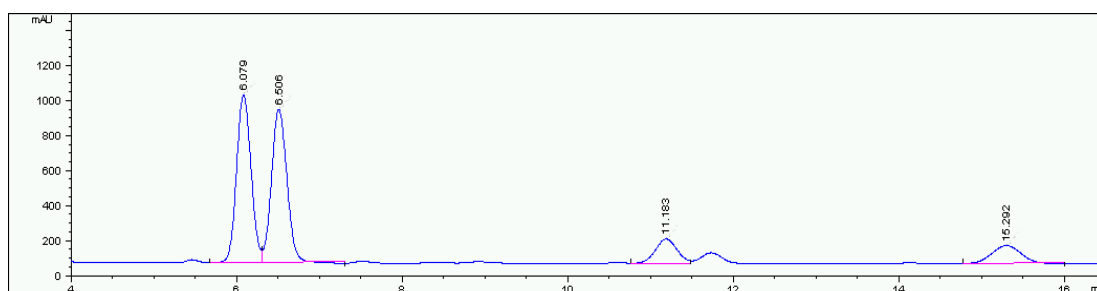

| Entry | Retention Time | Area    | Height | %Area  |
|-------|----------------|---------|--------|--------|
| 1     | 6.079          | 11733.7 | 959.4  | 41.334 |
| 2     | 6.506          | 11334.1 | 875    | 39.926 |
| 3     | 11.183         | 2731.6  | 143.3  | 9.623  |
| 4     | 15.292         | 2588.3  | 103.8  | 9.118  |

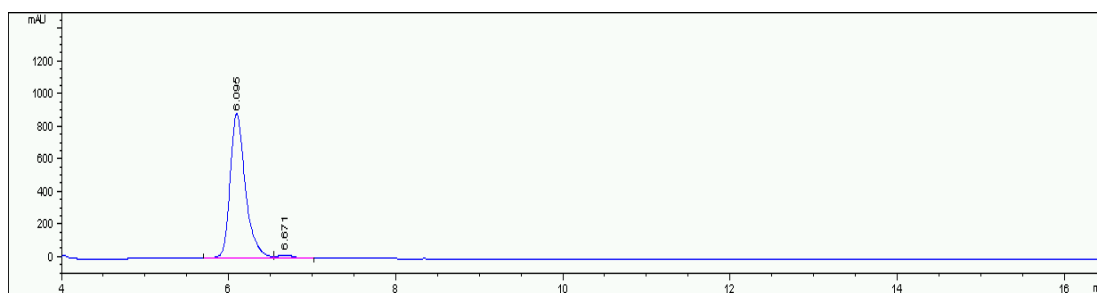

| Entry | Retention Time | Area    | Height | %Area  |
|-------|----------------|---------|--------|--------|
| 1     | 6.095          | 11509.3 | 884    | 96.840 |
| 2     | 6.671          | 375.6   | 25.5   | 3.160  |

### Determination of the relationship between the ee of CPA C3 and the ee of product 3e

The ee of **C3** was determined by HPLC analysis: CHIRALPAK QN-AX (4.6 mm i.d. x 150 mm); methanol/acetonitrile/acetic acid/triethylamine = 50/50/2/1.6; flow rate 0.5 mL/min; 25 °C; 254 nm; retention time: 4.8 min, 7.2 min. (upper spectrum)

The ee of **3e** was determined by HPLC analysis: CHIRALPAK IE (4.6 mm i.d. x 250 mm); hexane/2-propanol = 60/40; flow rate 1.0 mL/min; 25 °C; 210 nm; retention time: 7.4 min, 12.8 min. (below spectrum)

**A:**

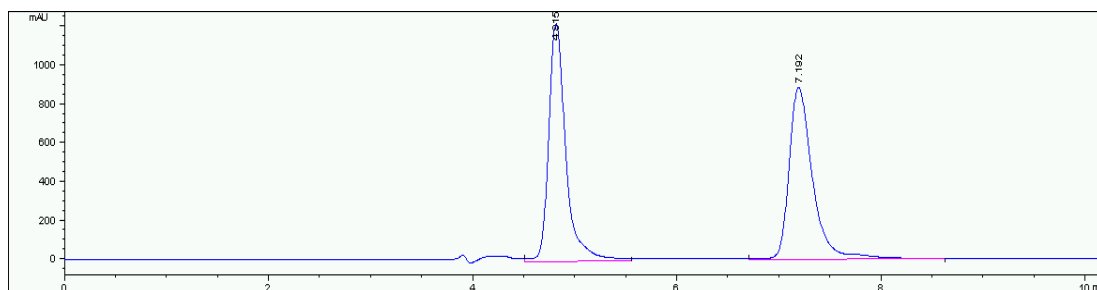

| Entry | Retention Time | Area    | Height | %Area  |
|-------|----------------|---------|--------|--------|
| 1     | 4.815          | 14663.9 | 1228.8 | 50.077 |
| 2     | 7.192          | 14619   | 891    | 49.923 |

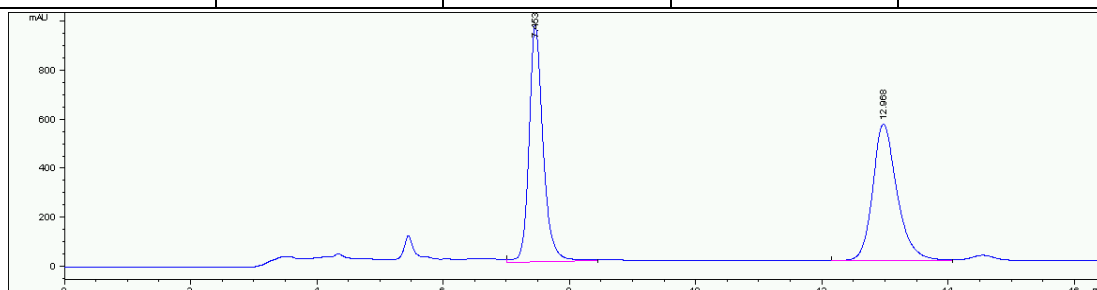

| Entry | Retention Time | Area    | Height | %Area  |
|-------|----------------|---------|--------|--------|
| 1     | 7.453          | 15246.5 | 969.7  | 50.396 |
| 2     | 12.968         | 15007   | 556.9  | 49.604 |

**B:**

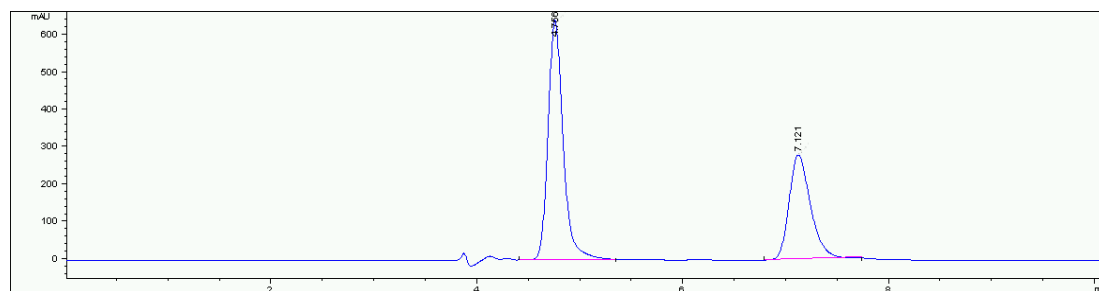

| Entry | Retention Time | Area   | Height | %Area  |
|-------|----------------|--------|--------|--------|
| 1     | 4.756          | 6541.2 | 640.6  | 62.241 |
| 2     | 7.121          | 3968.4 | 278    | 37.759 |

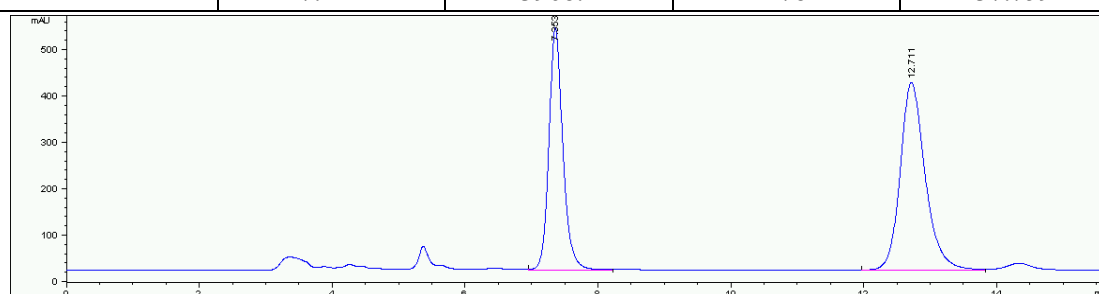

| Entry | Retention Time | Area    | Height | %Area  |
|-------|----------------|---------|--------|--------|
| 1     | 7.353          | 7681.1  | 523    | 41.964 |
| 2     | 12.711         | 10622.9 | 404.9  | 58.036 |

**C:**

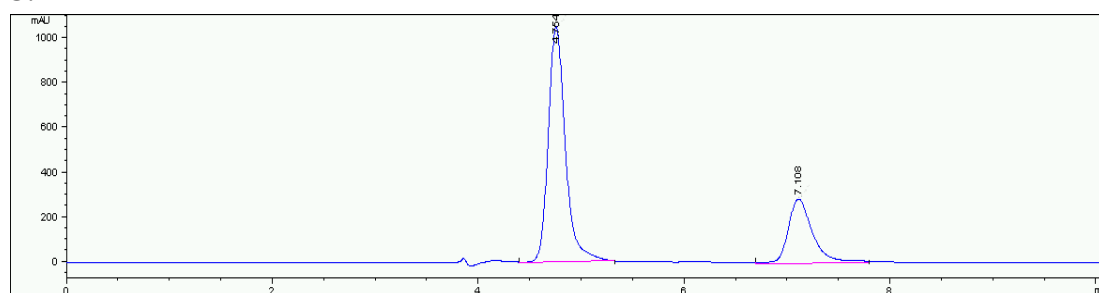

| Entry | Retention Time | Area    | Height | %Area  |
|-------|----------------|---------|--------|--------|
| 1     | 4.754          | 12259.8 | 1055.6 | 71.442 |
| 2     | 7.108          | 4900.6  | 290    | 28.558 |

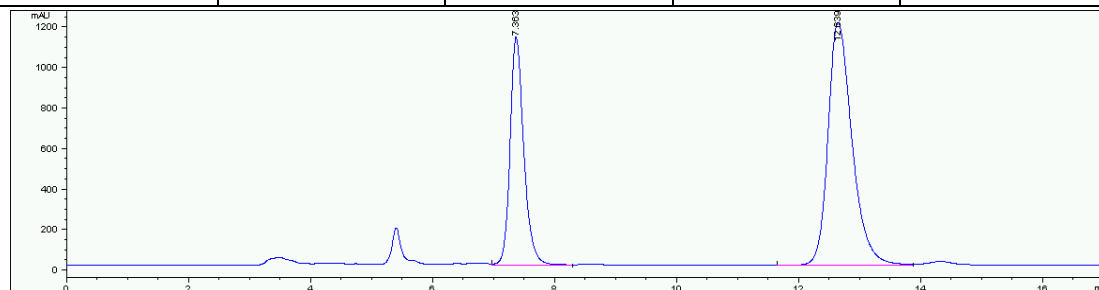

| Entry | Retention Time | Area    | Height | %Area  |
|-------|----------------|---------|--------|--------|
| 1     | 7.363          | 17728.4 | 1128   | 34.987 |
| 2     | 12.639         | 32943.3 | 1198.9 | 65.013 |



**D:**

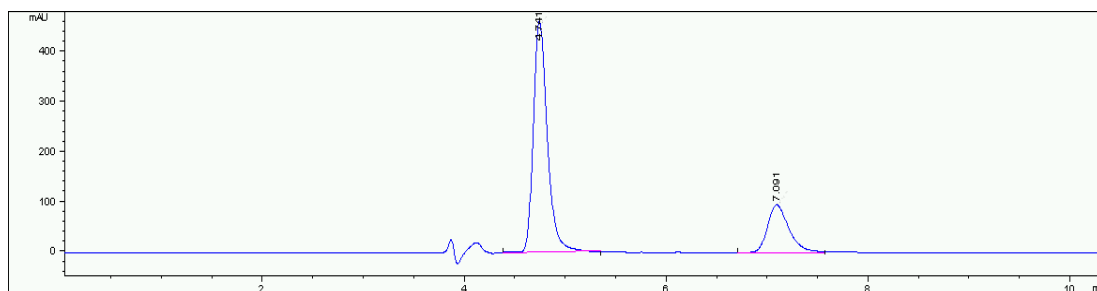

| Entry | Retention Time | Area   | Height | %Area  |
|-------|----------------|--------|--------|--------|
| 1     | 4.741          | 4479.2 | 464.3  | 75.583 |
| 2     | 7.091          | 1447   | 96.1   | 24.417 |

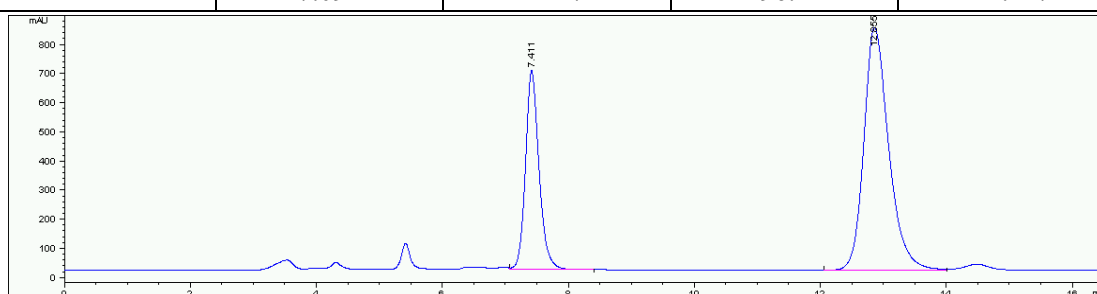

| Entry | Retention Time | Area    | Height | %Area  |
|-------|----------------|---------|--------|--------|
| 1     | 7.411          | 10353.8 | 685.6  | 31.169 |
| 2     | 12.855         | 22865   | 833.1  | 68.831 |

**E:**

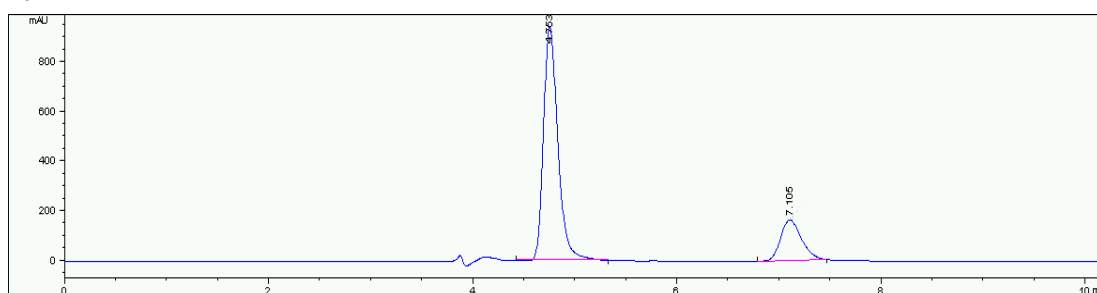

| Entry | Retention Time | Area   | Height | %Area  |
|-------|----------------|--------|--------|--------|
| 1     | 4.753          | 9231.8 | 942.5  | 79.260 |
| 2     | 7.105          | 2415.7 | 166.6  | 20.740 |

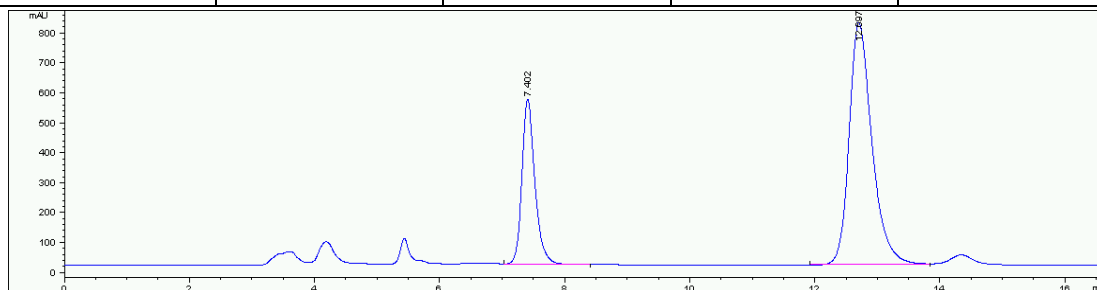

| Entry | Retention Time | Area    | Height | %Area  |
|-------|----------------|---------|--------|--------|
| 1     | 7.402          | 8087.2  | 552.6  | 28.053 |
| 2     | 12.697         | 20741.7 | 810.4  | 71.947 |

**F:**

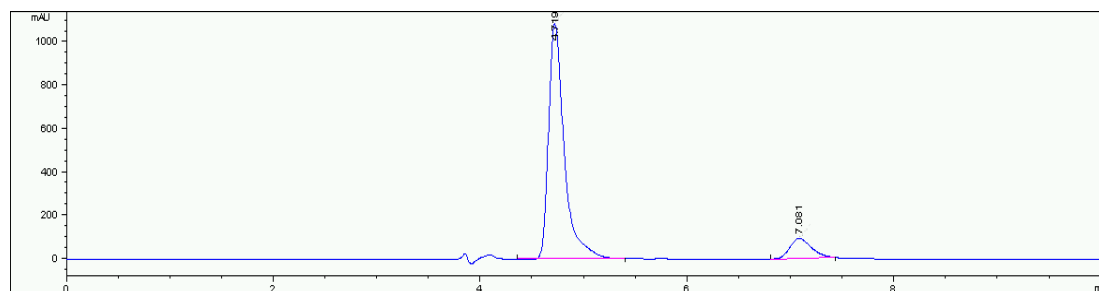

| Entry | Retention Time | Area   | Height | %Area  |
|-------|----------------|--------|--------|--------|
| 1     | 4.719          | 11547  | 1089.2 | 88.936 |
| 2     | 7.081          | 1436.4 | 95.3   | 11.064 |

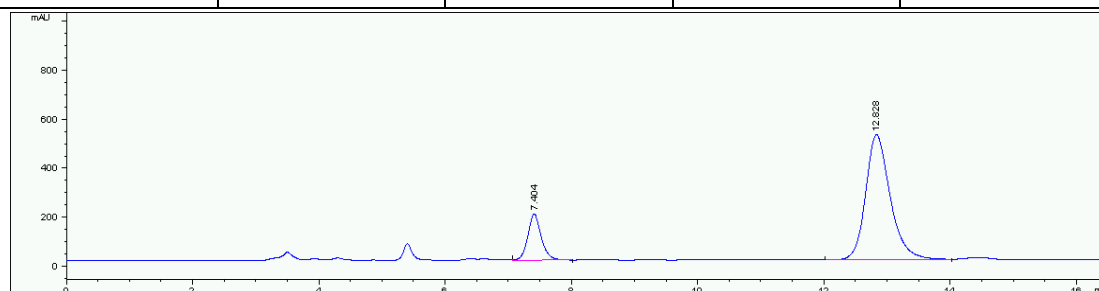

| Entry | Retention Time | Area    | Height | %Area  |
|-------|----------------|---------|--------|--------|
| 1     | 7.404          | 2873.6  | 189.6  | 16.997 |
| 2     | 12.828         | 14033.3 | 511.8  | 83.003 |

**G:**

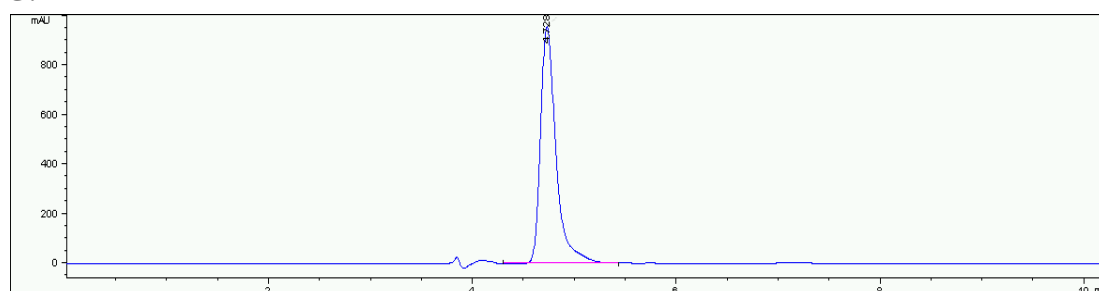

| Entry | Retention Time | Area    | Height | %Area   |
|-------|----------------|---------|--------|---------|
| 1     | 4.728          | 10128.9 | 957    | 100.000 |

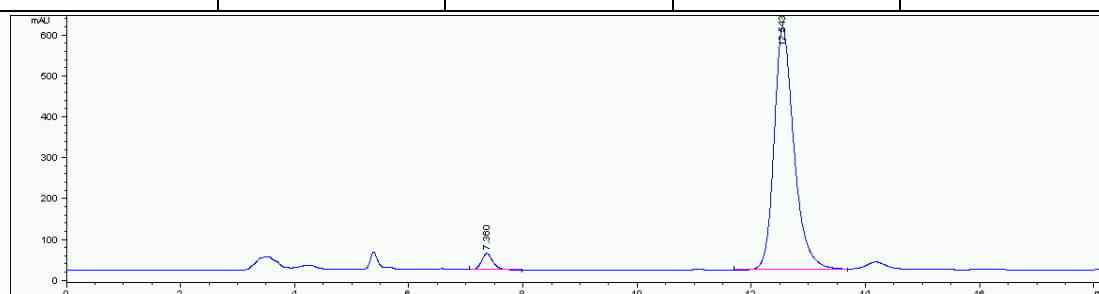

| Entry | Retention Time | Area    | Height | %Area  |
|-------|----------------|---------|--------|--------|
| 1     | 7.36           | 577.7   | 40.6   | 3.820  |
| 2     | 12.543         | 14543.9 | 593.4  | 96.180 |

## 8. Copies of NMR spectra

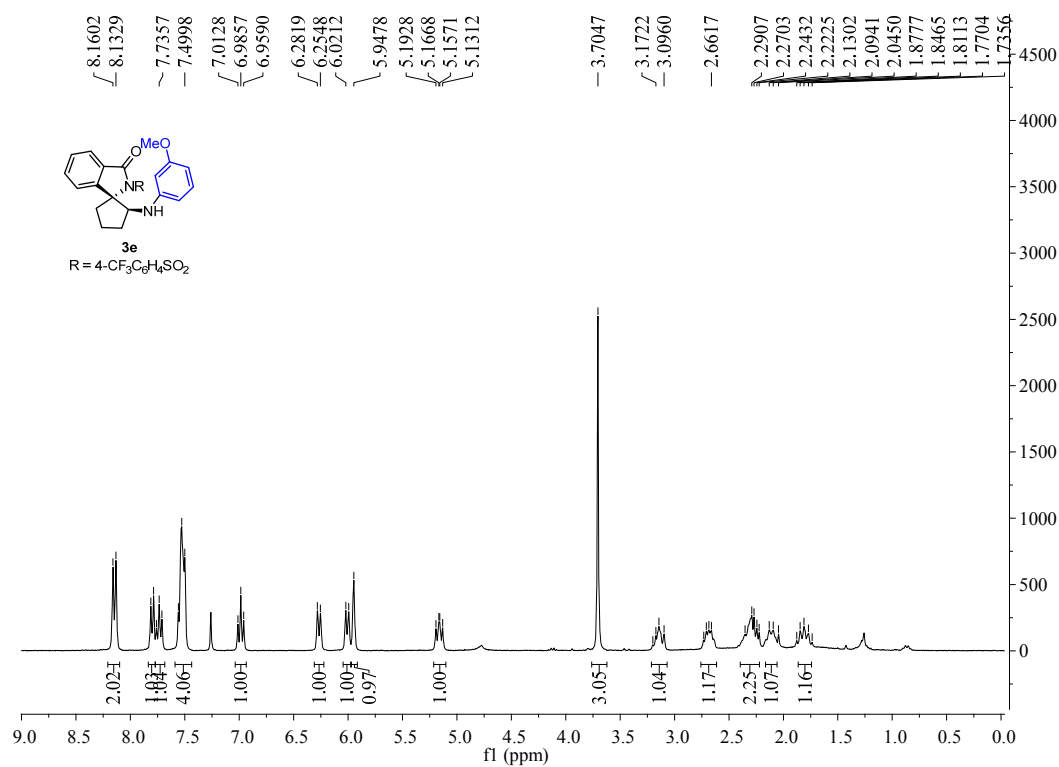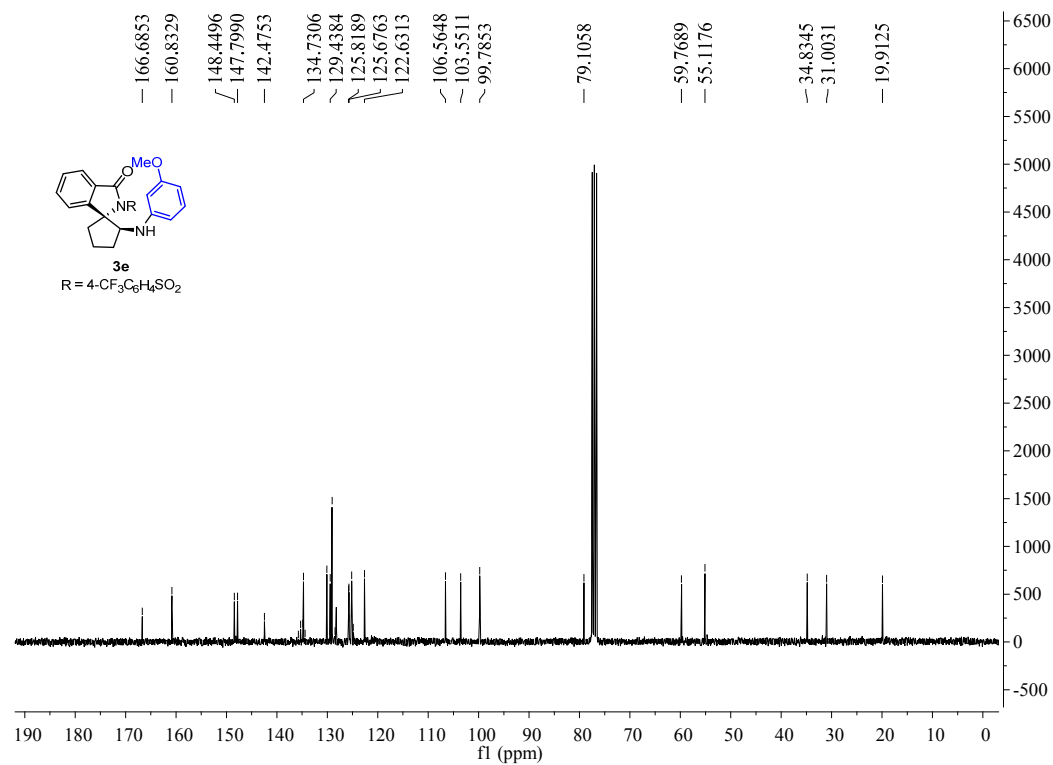

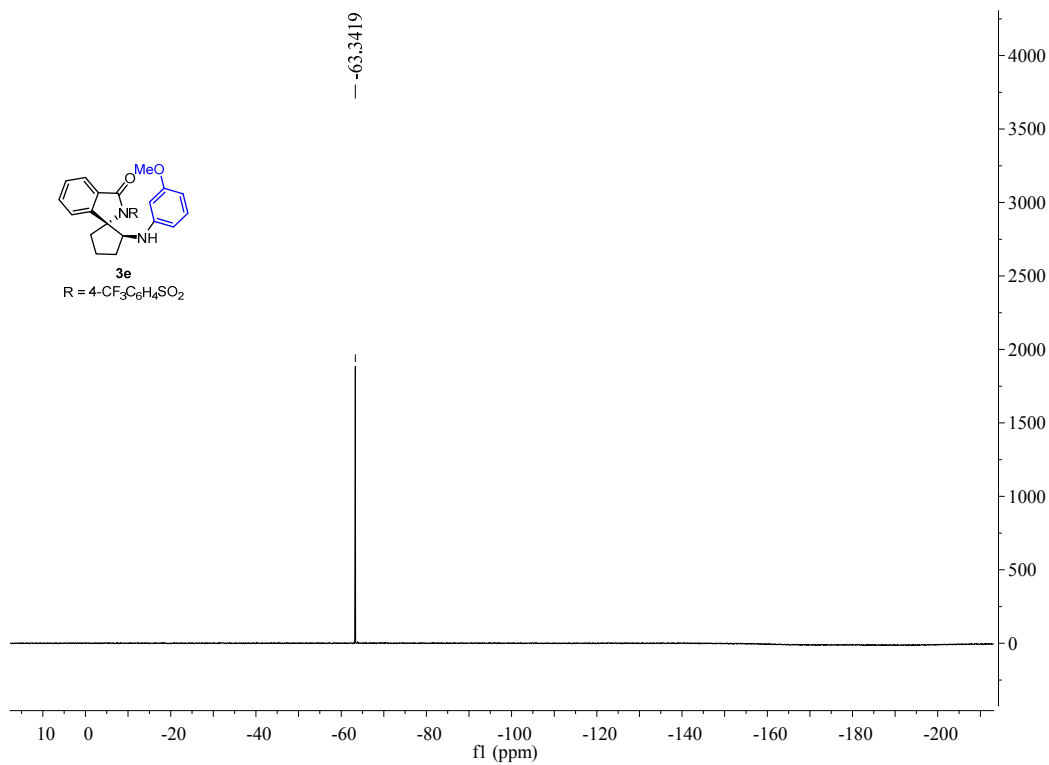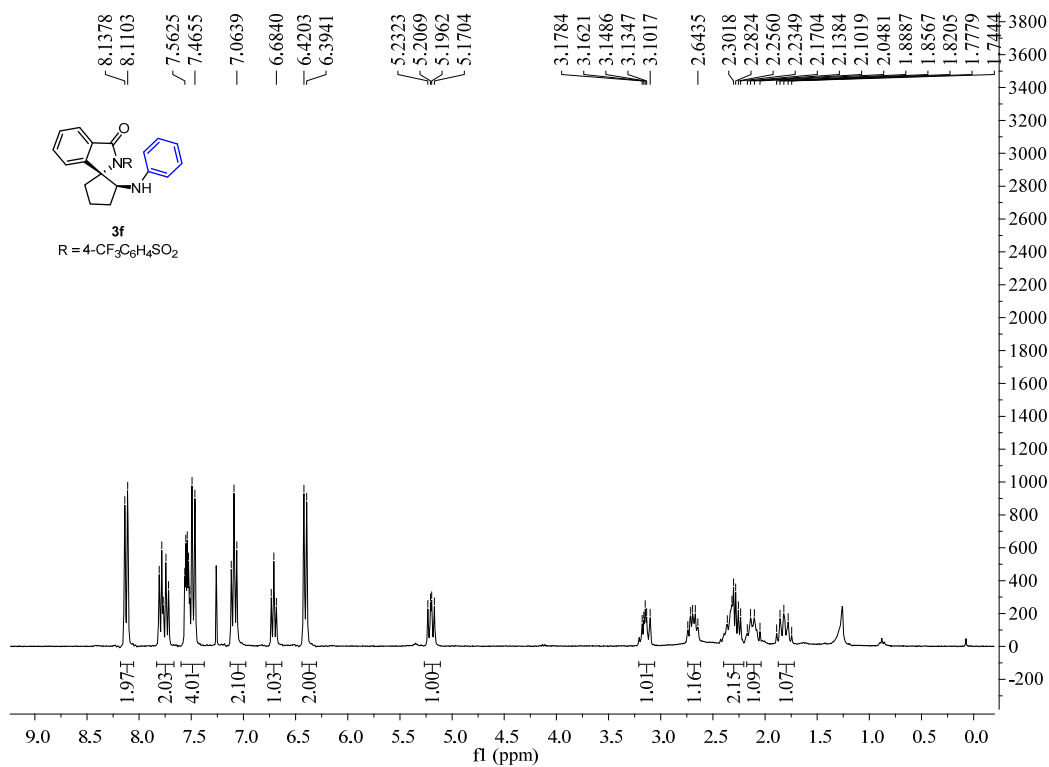

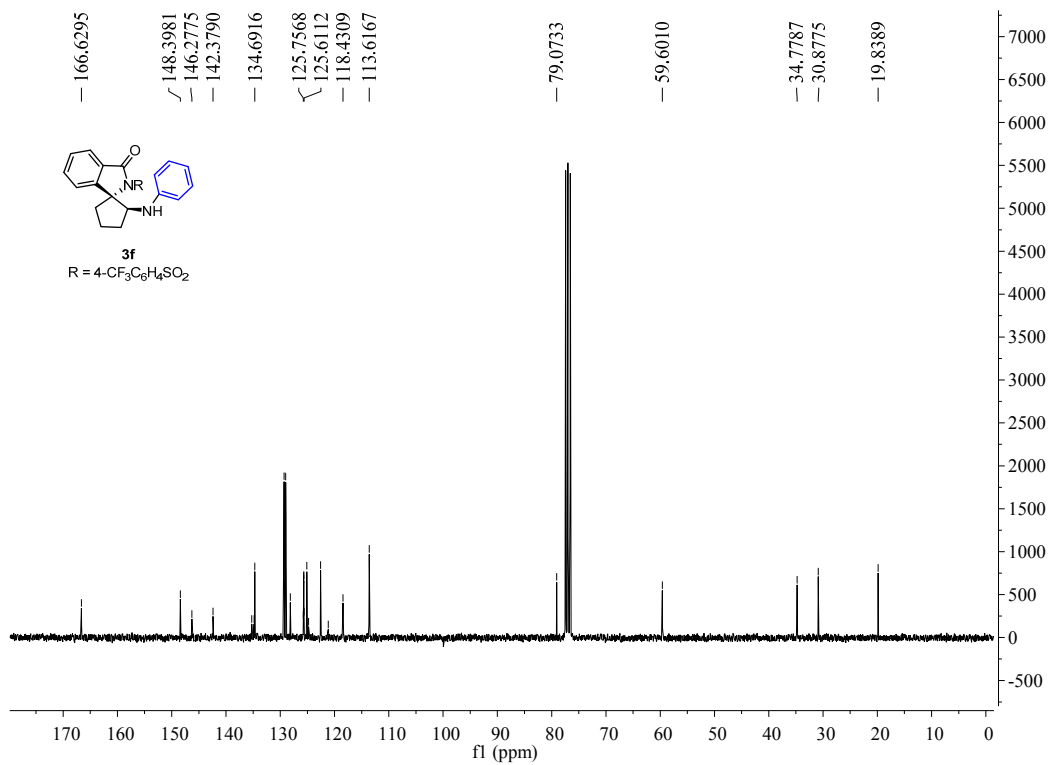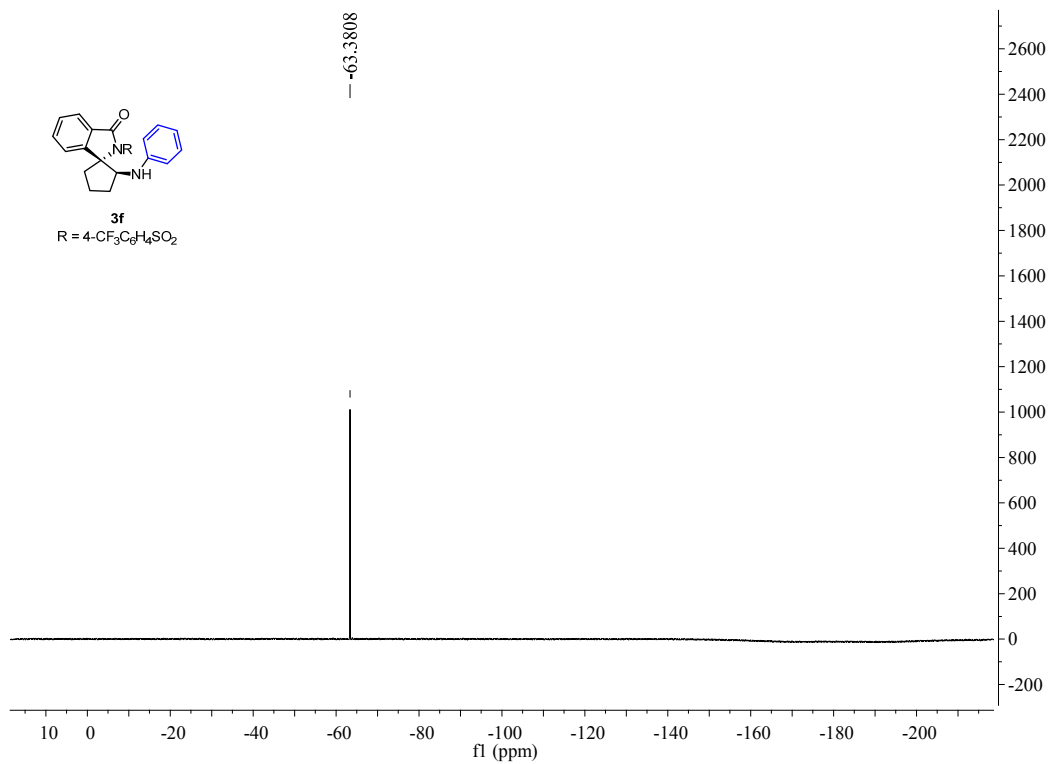

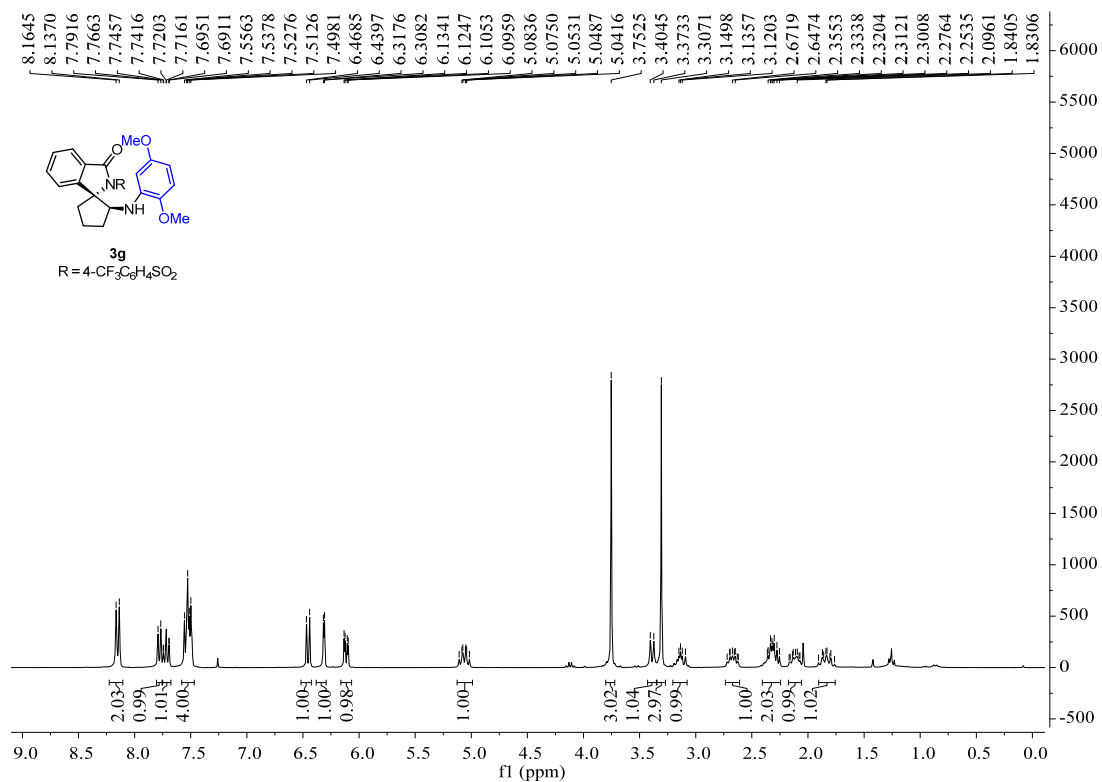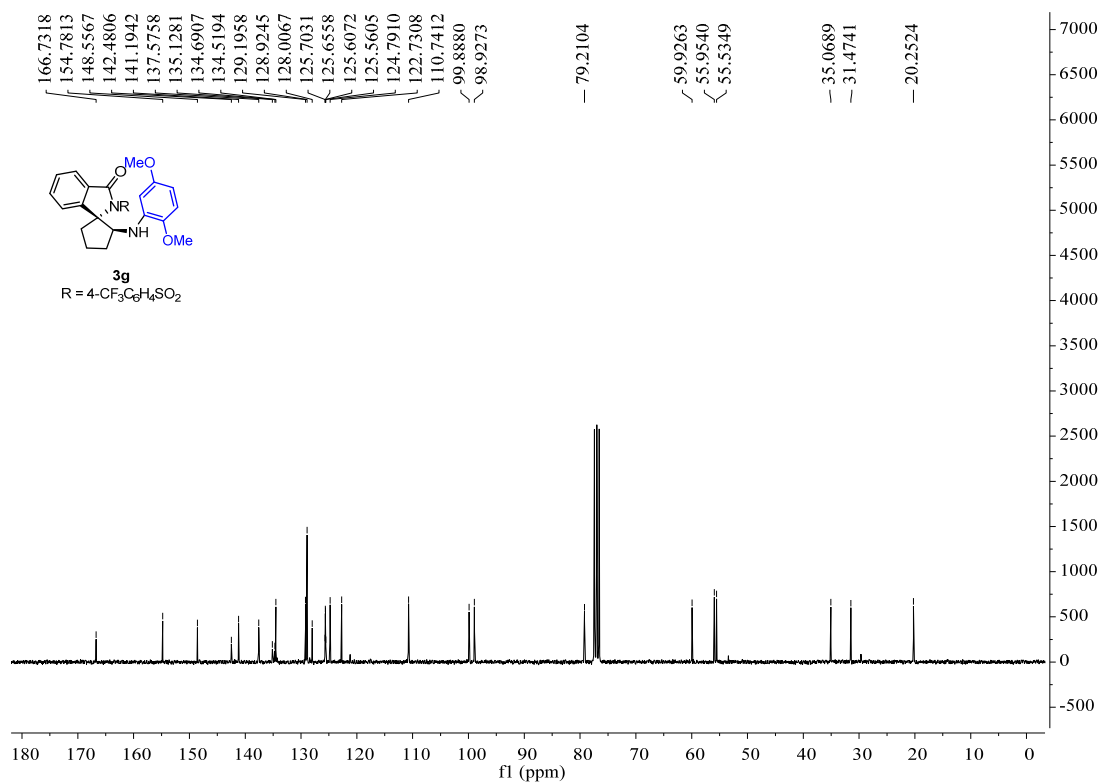

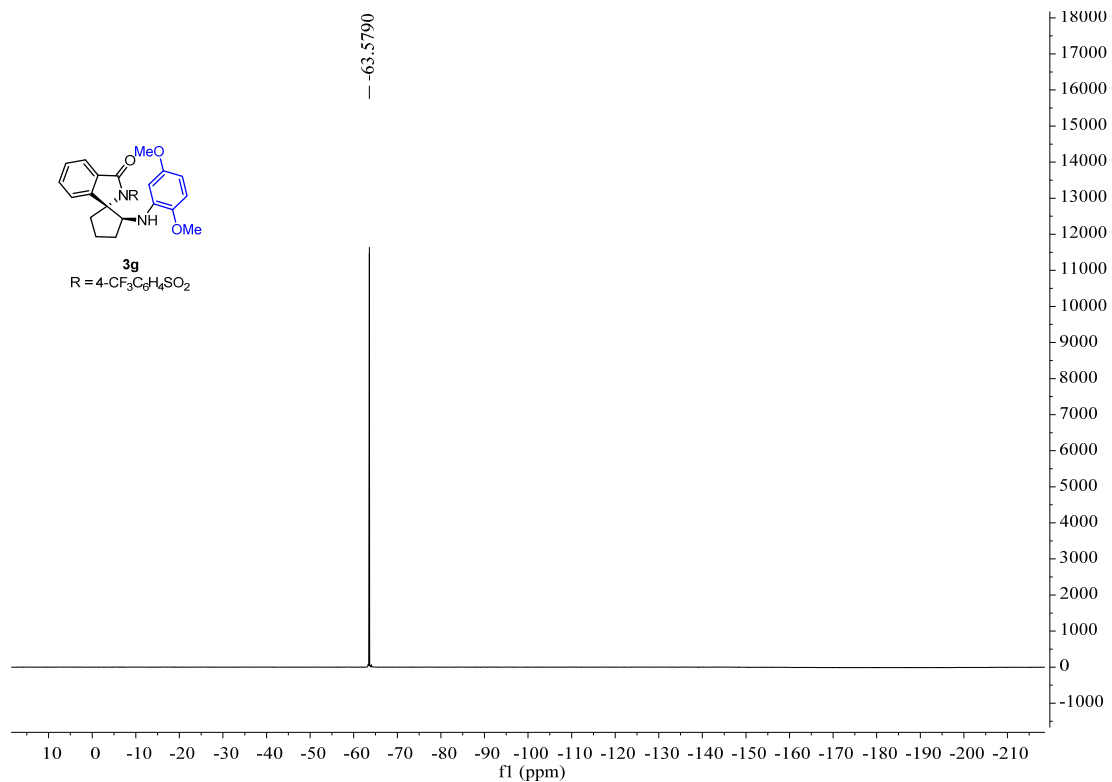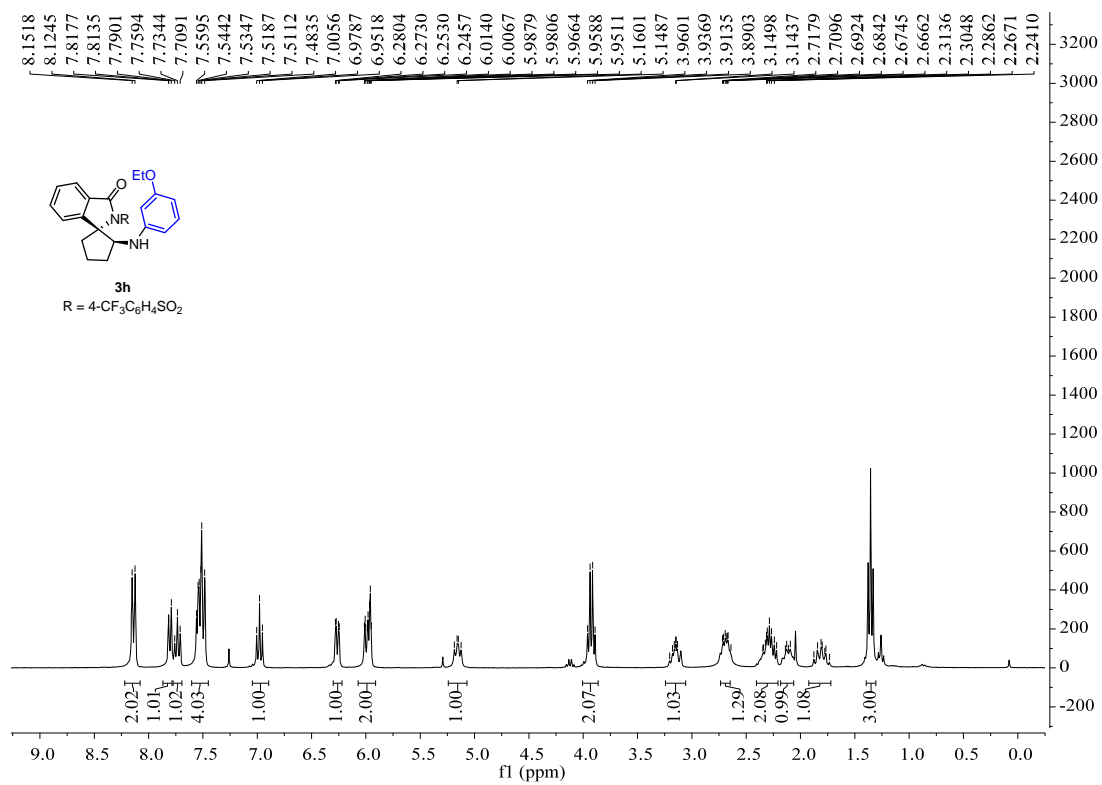

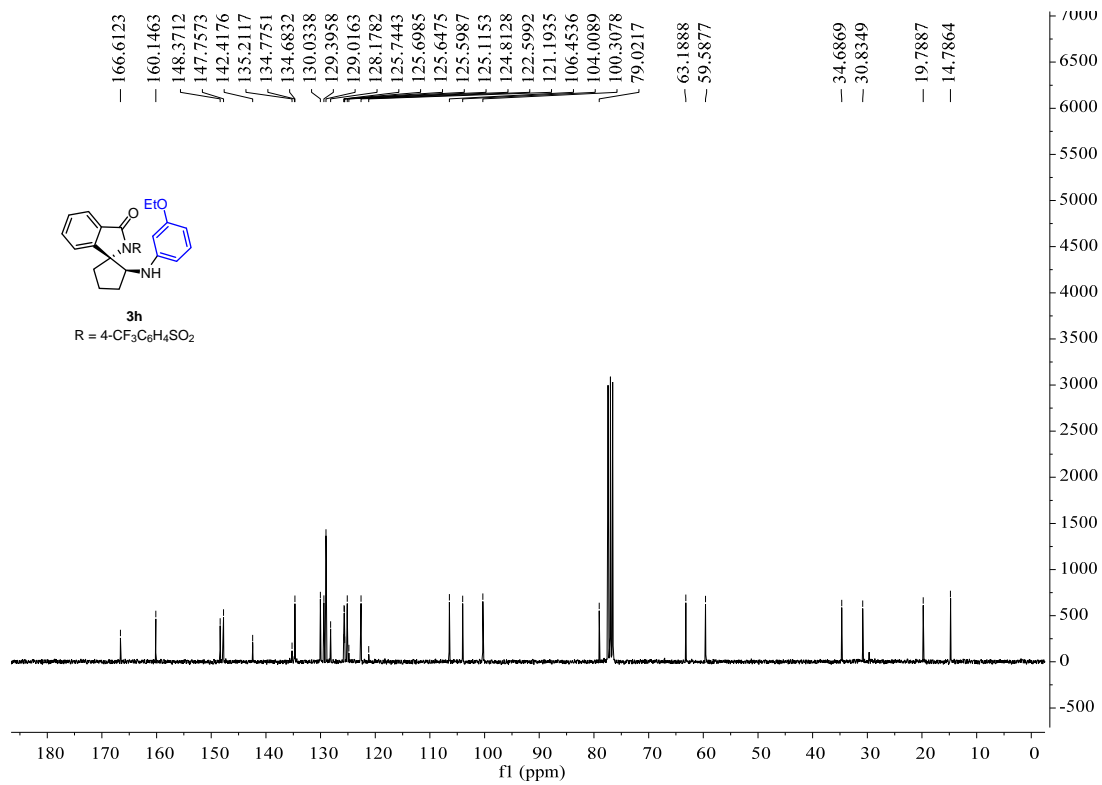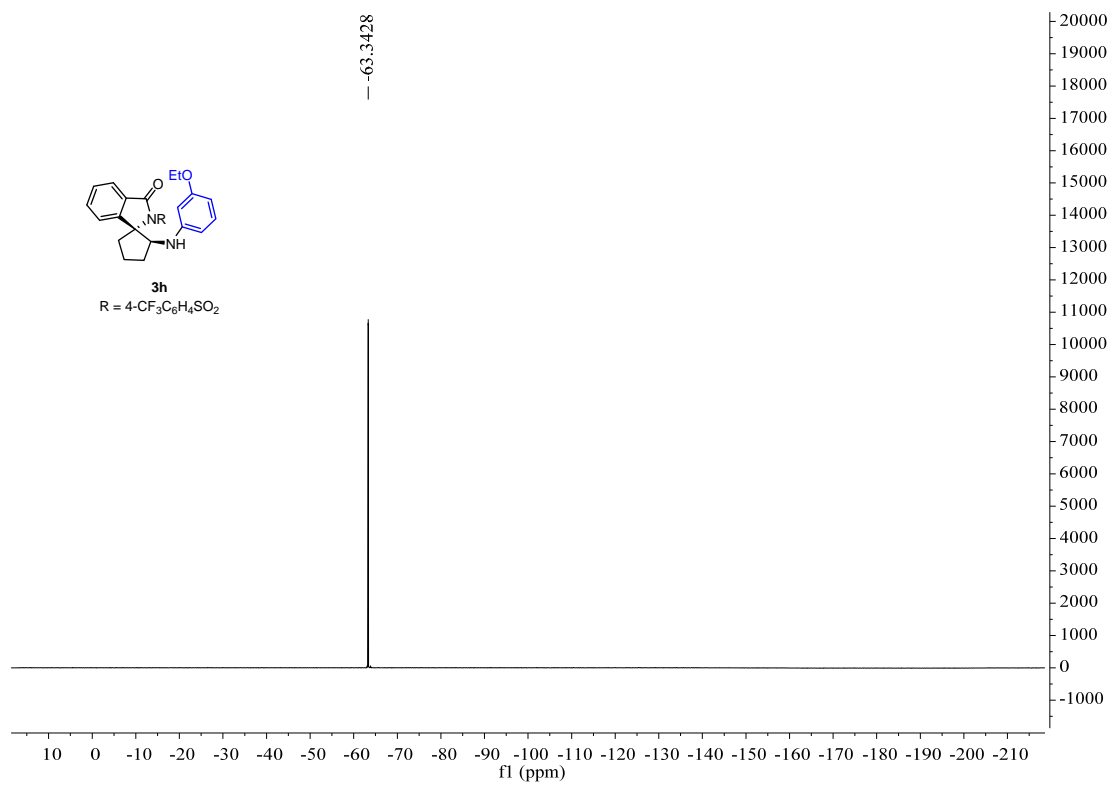



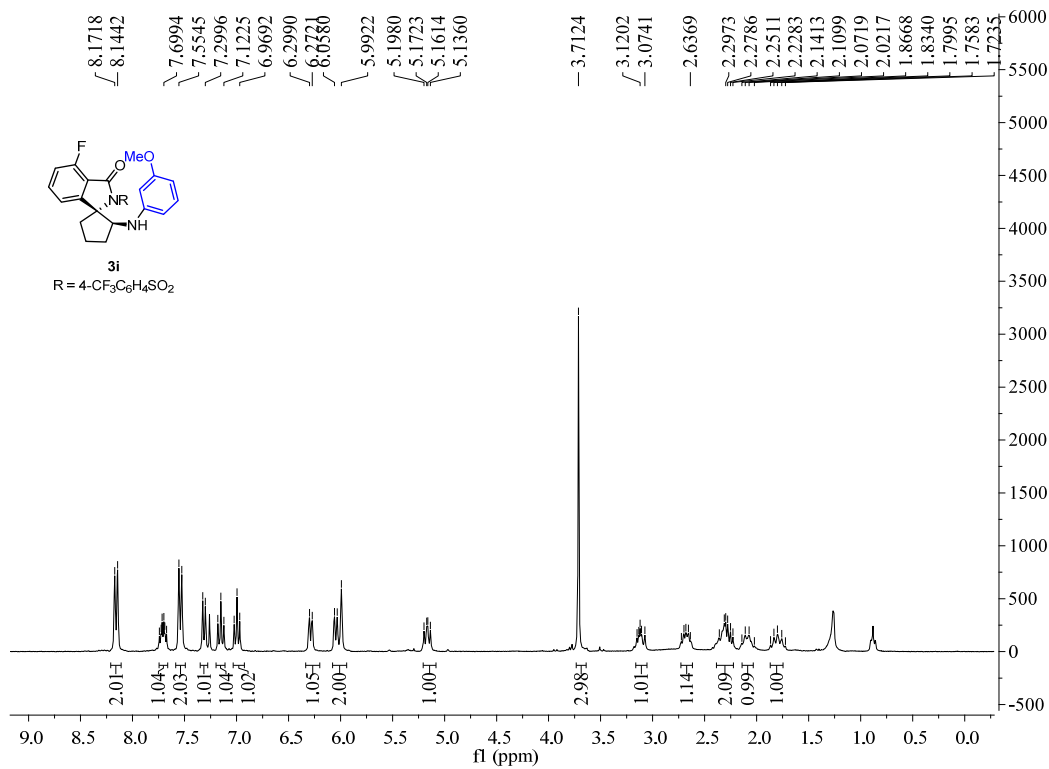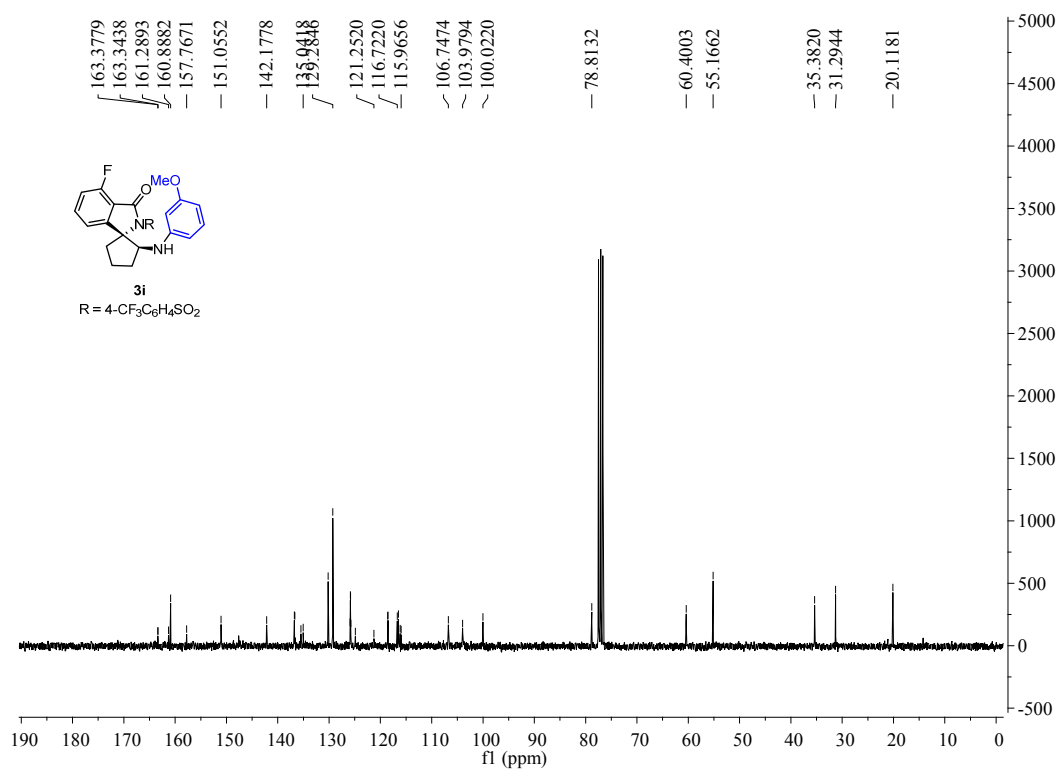

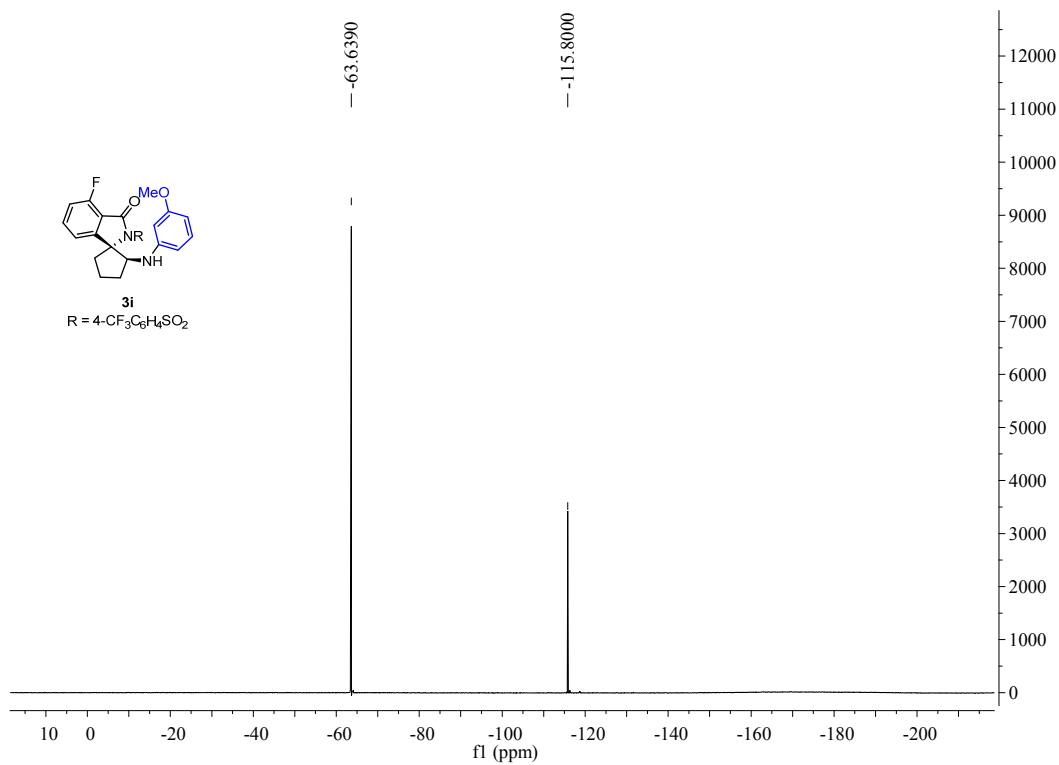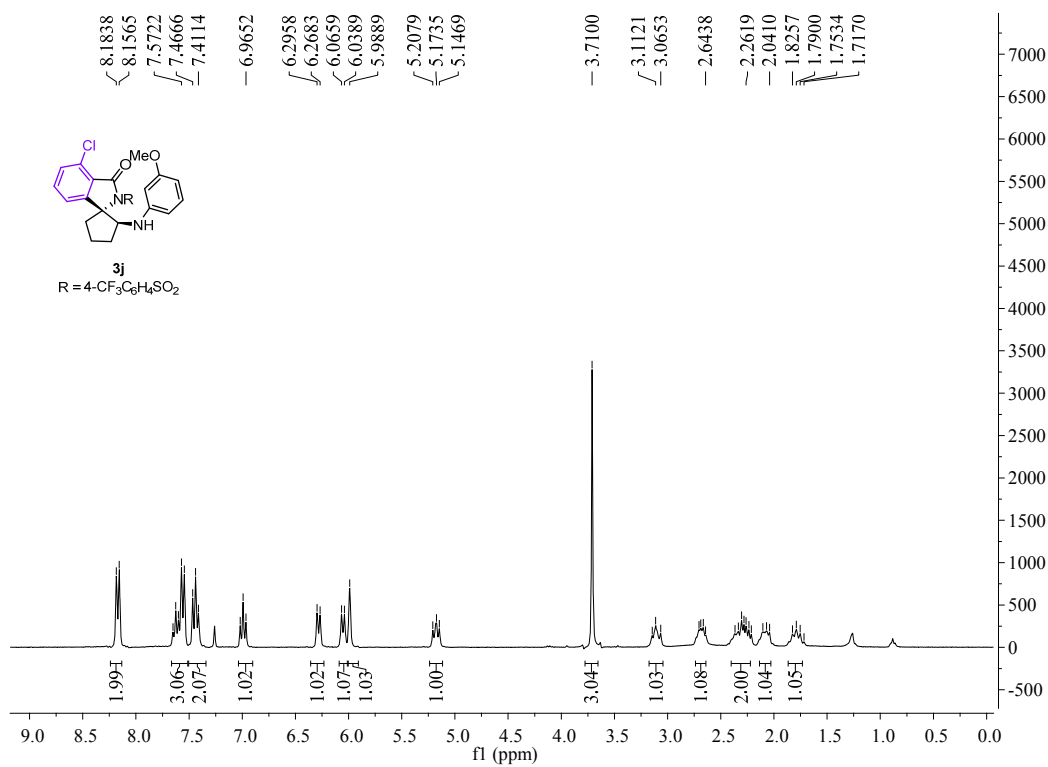

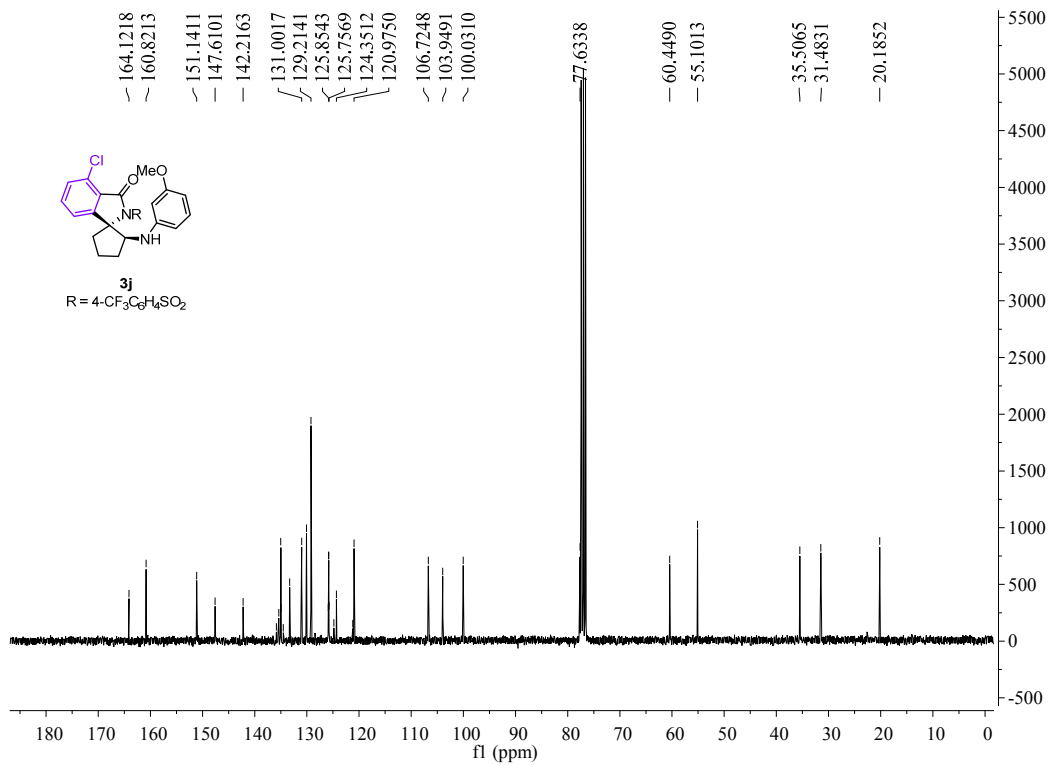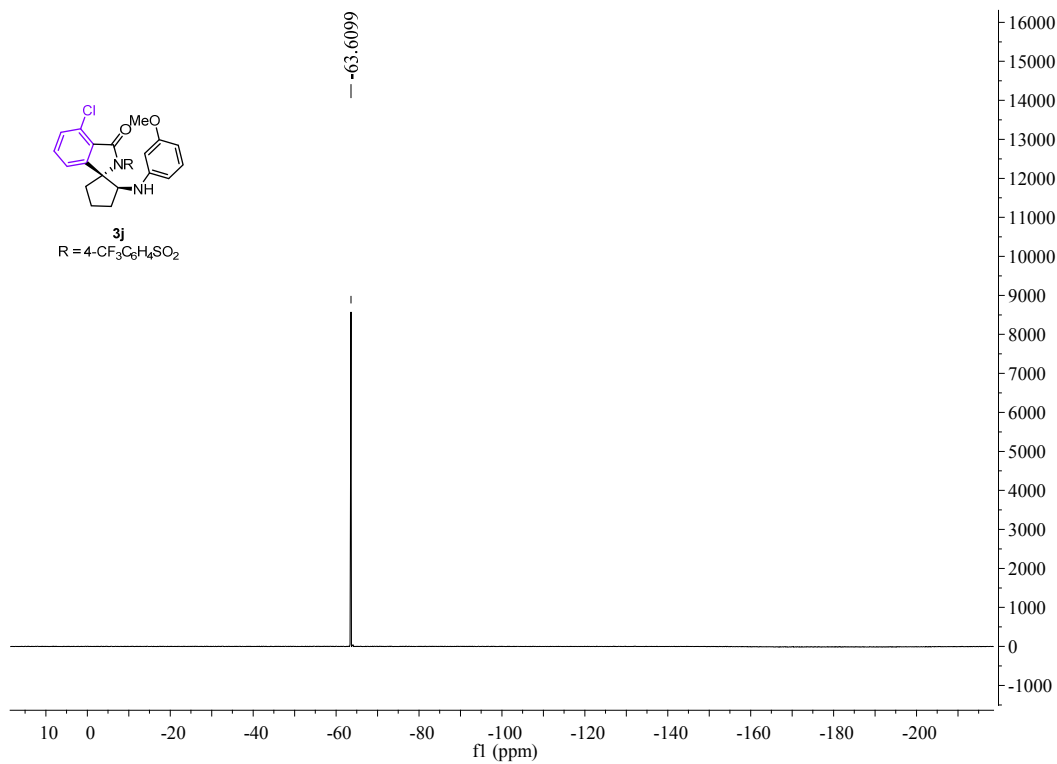

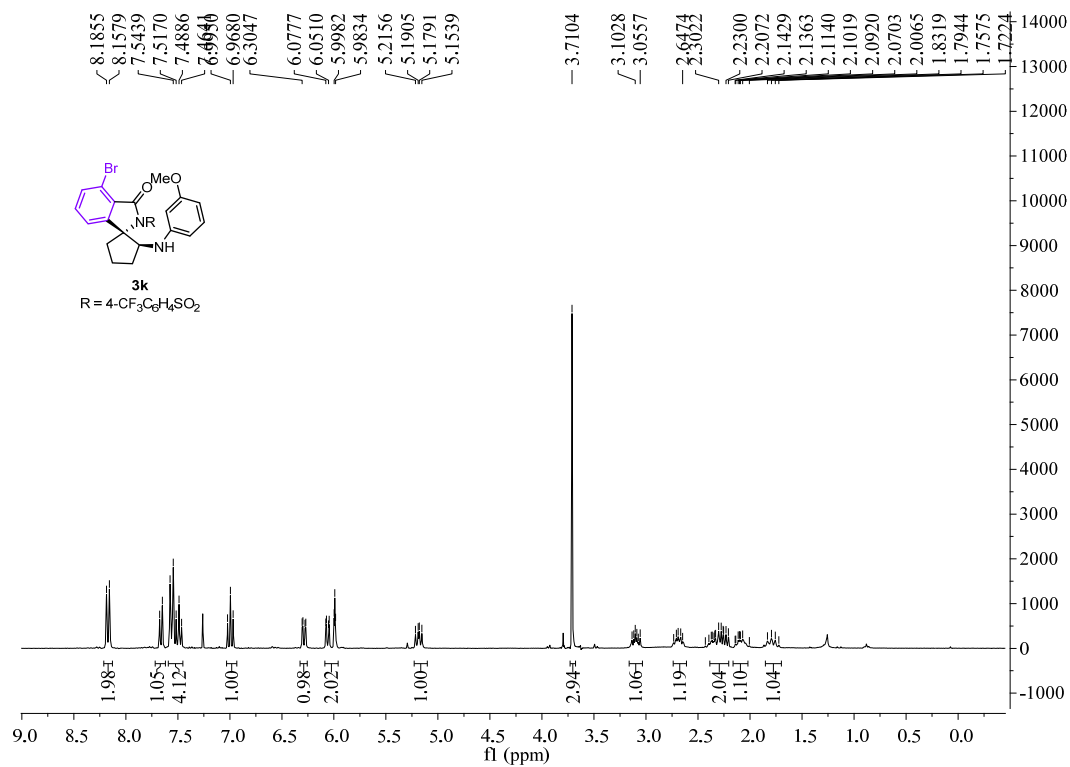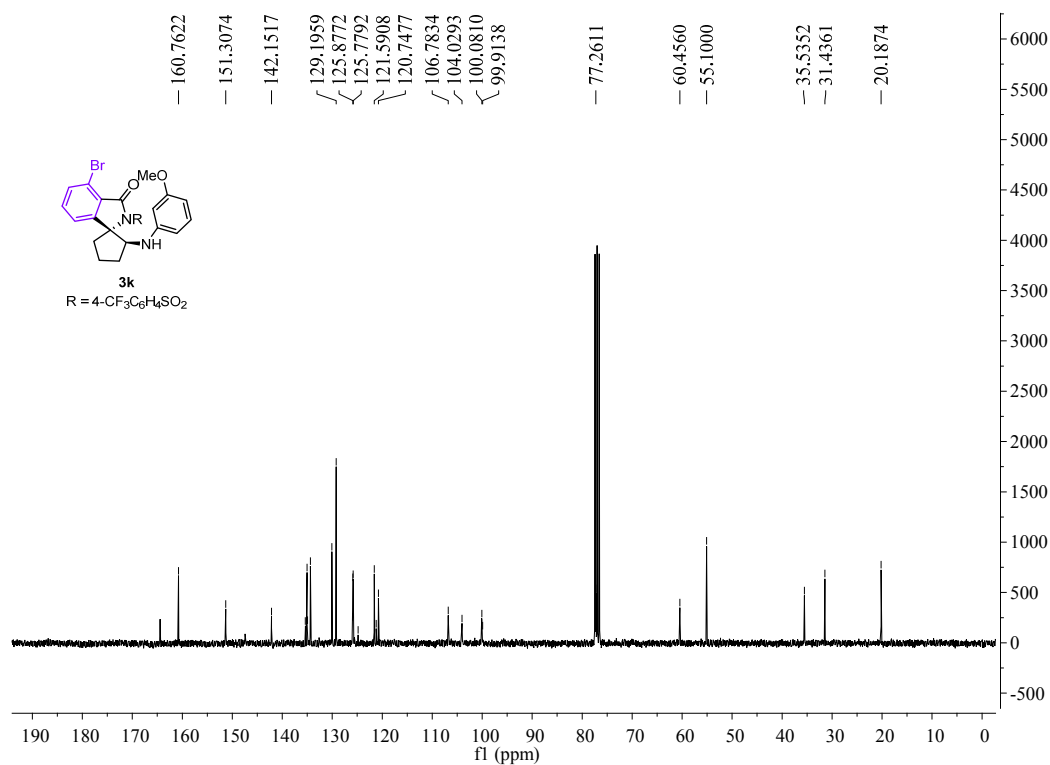

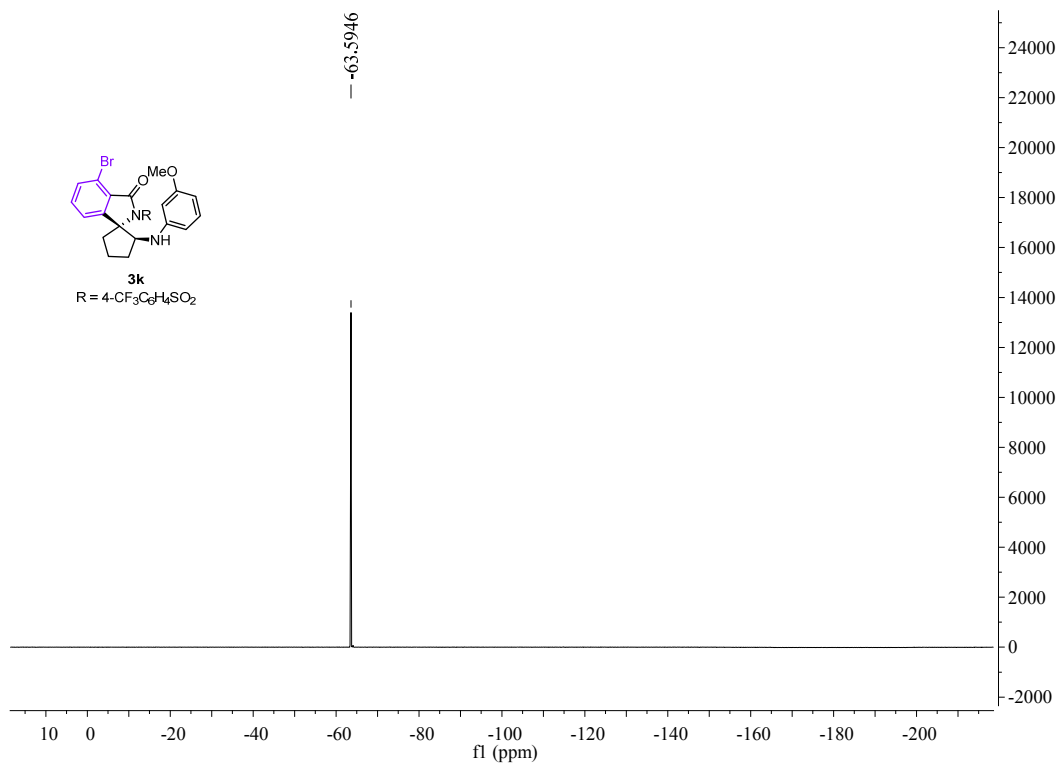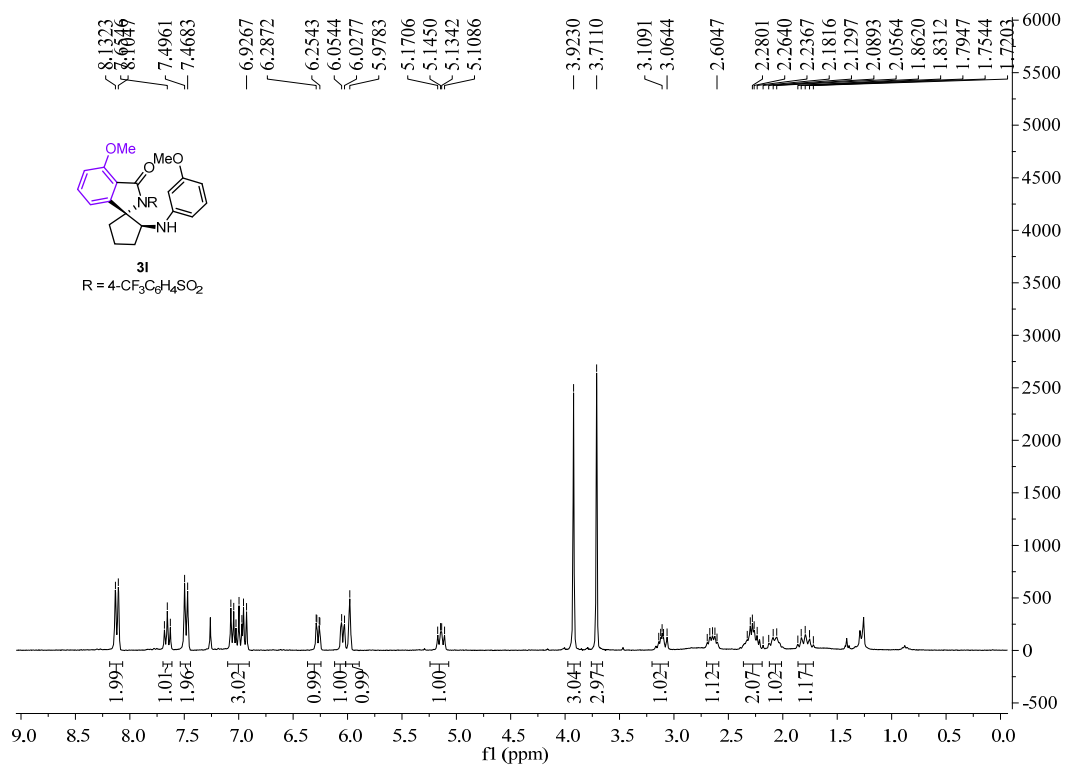

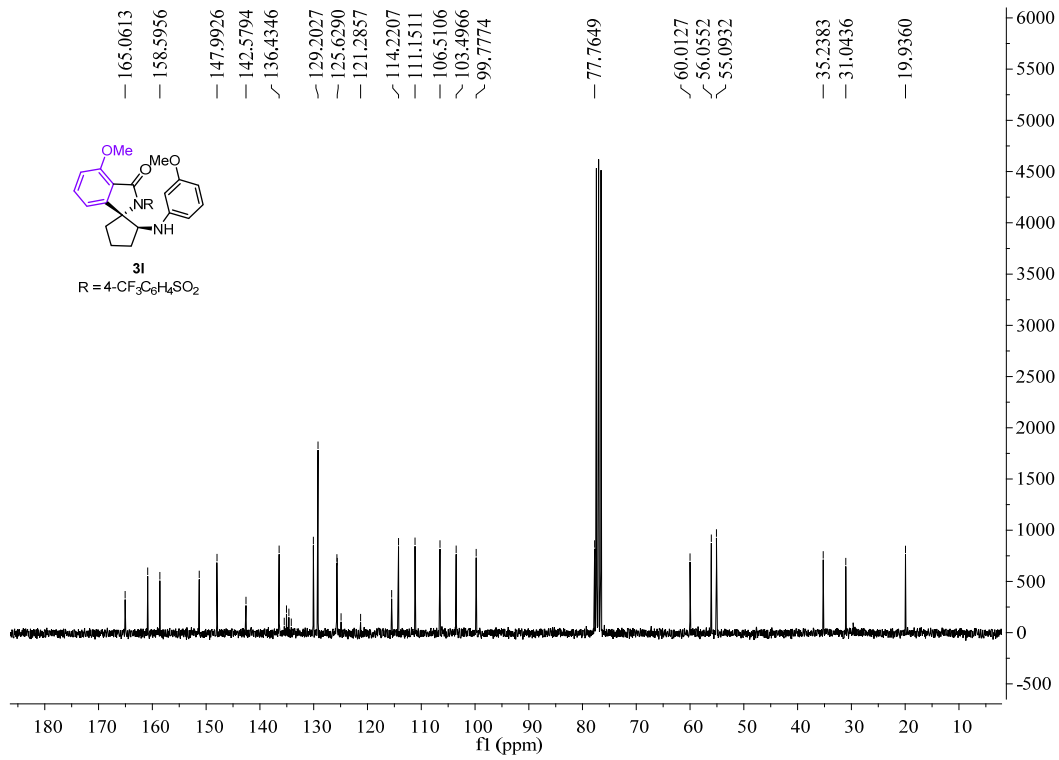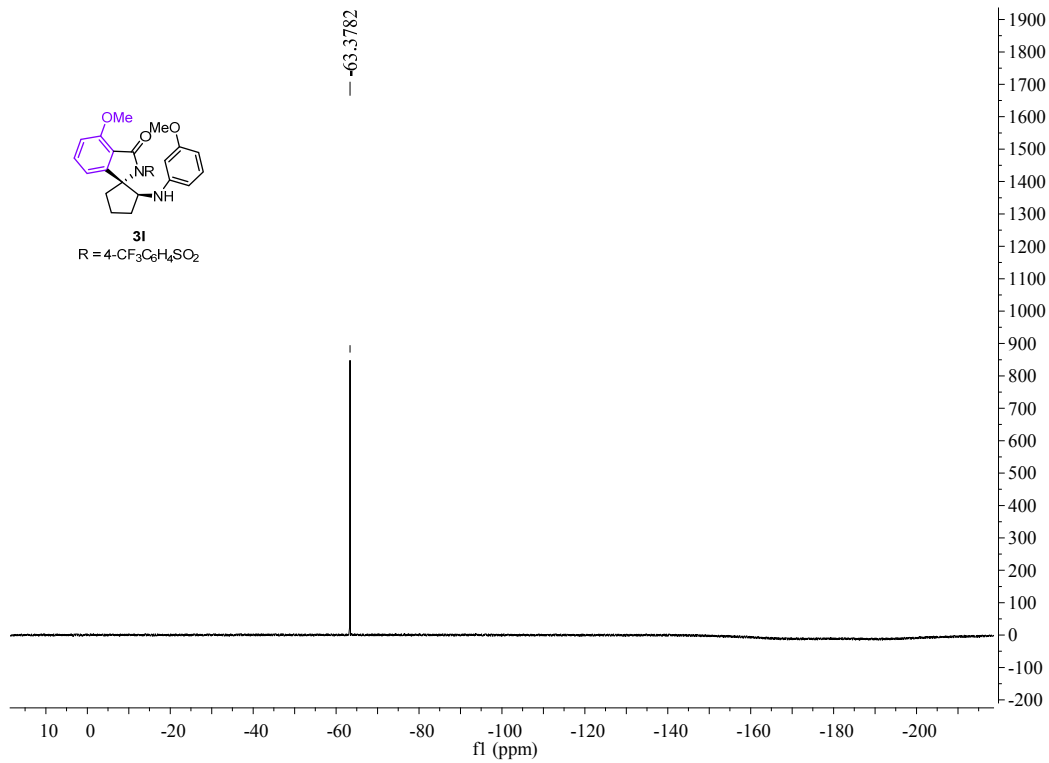

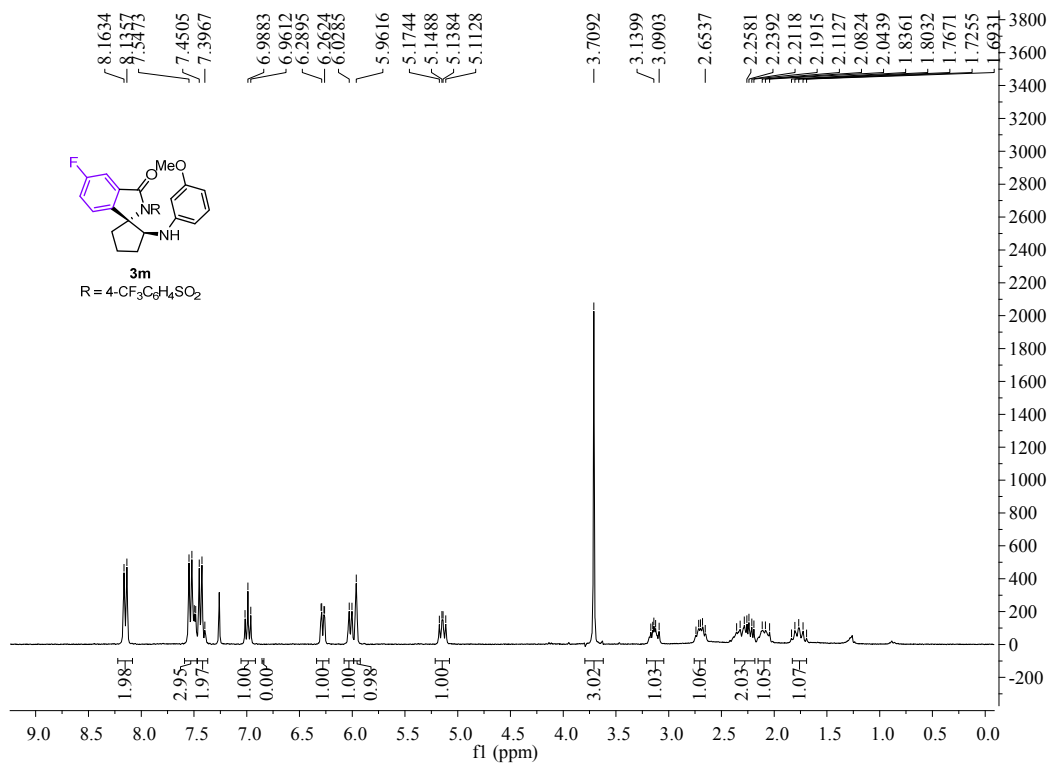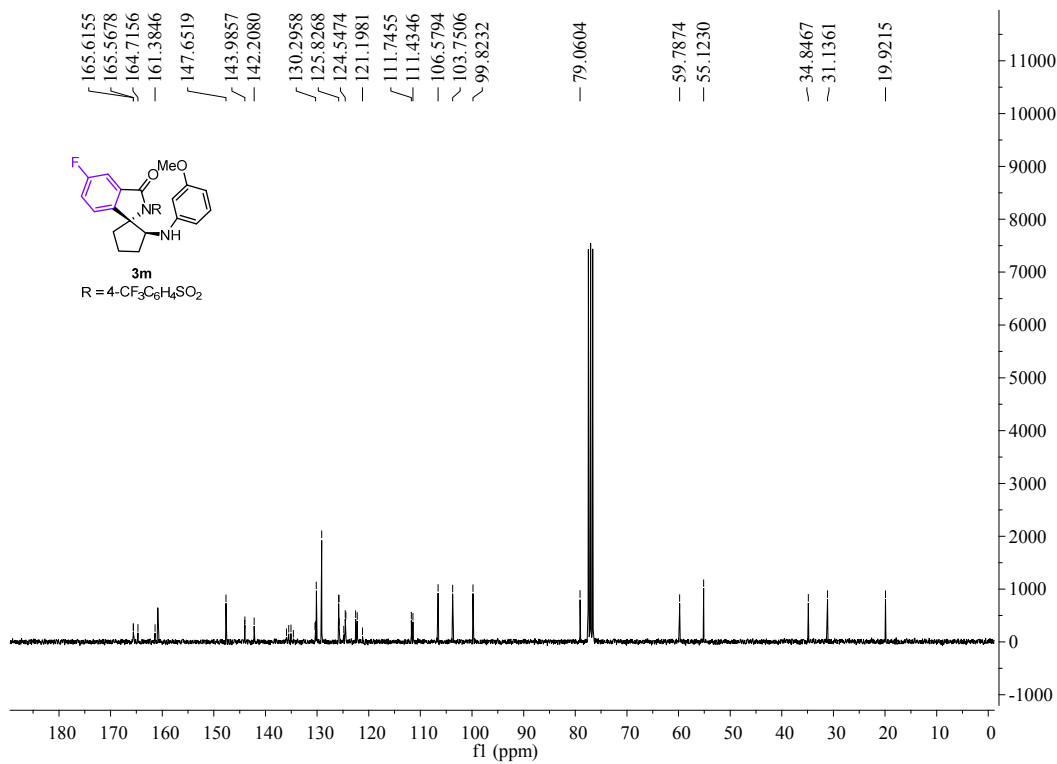

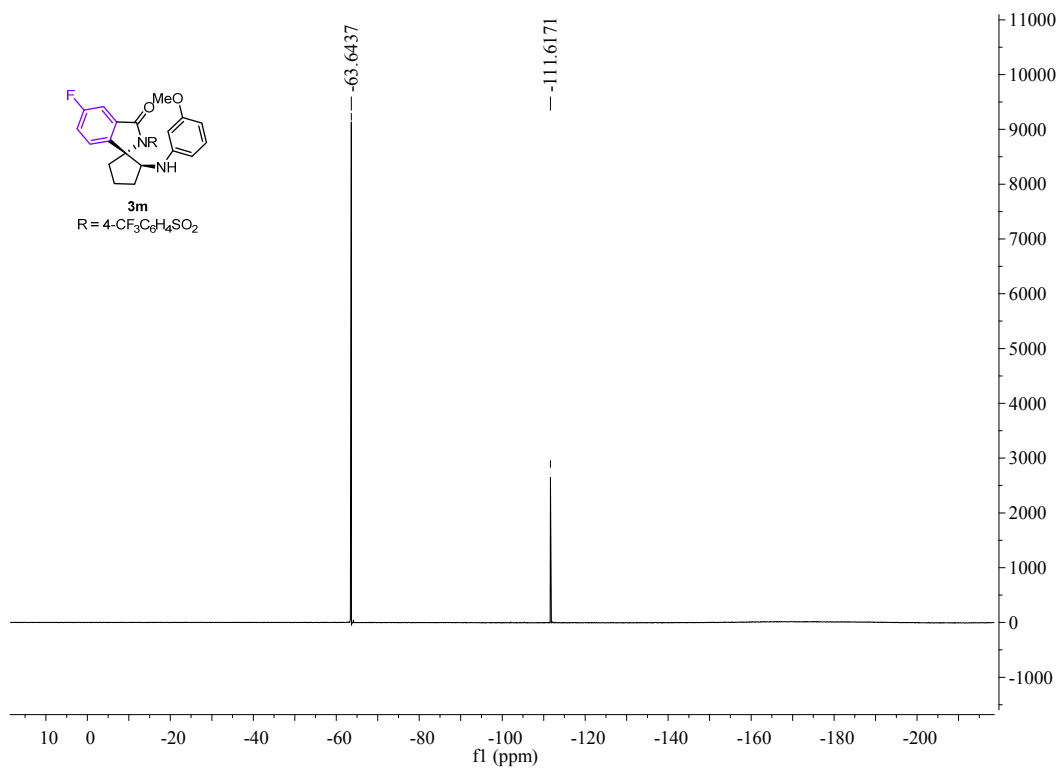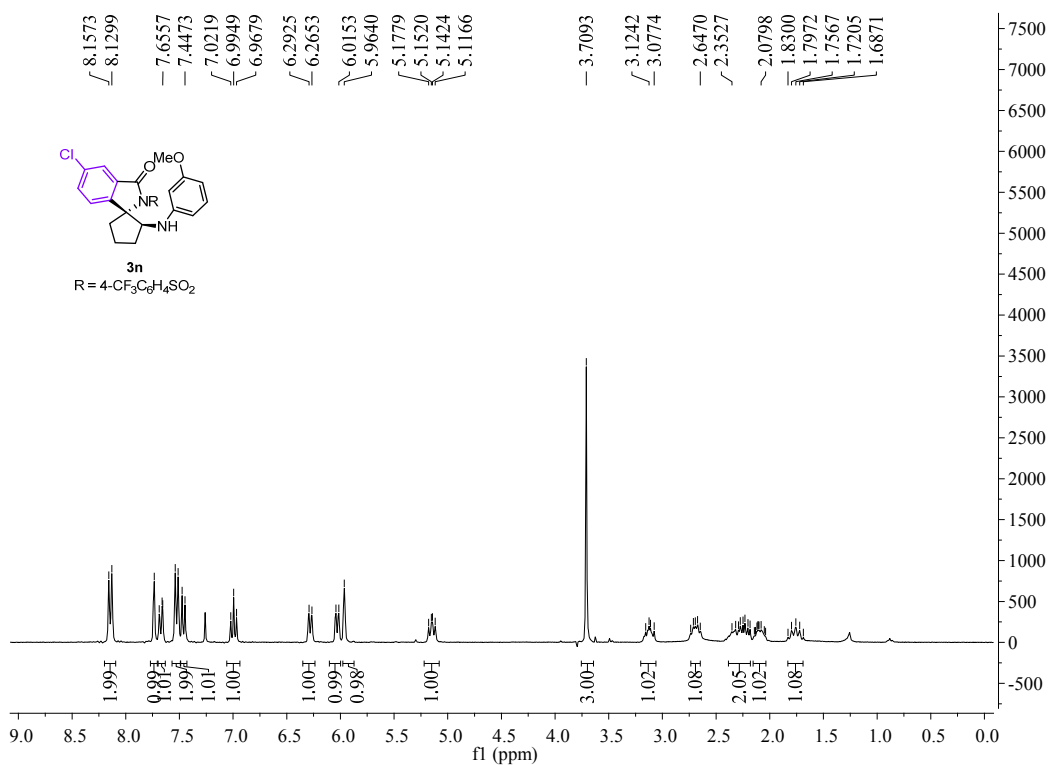



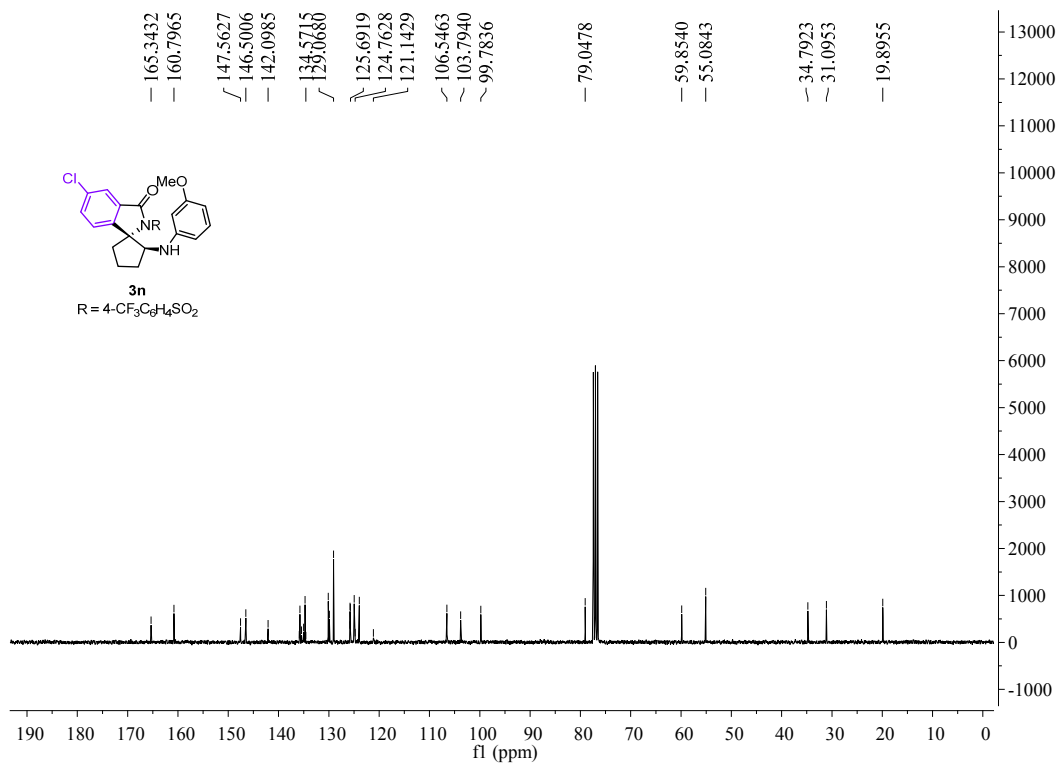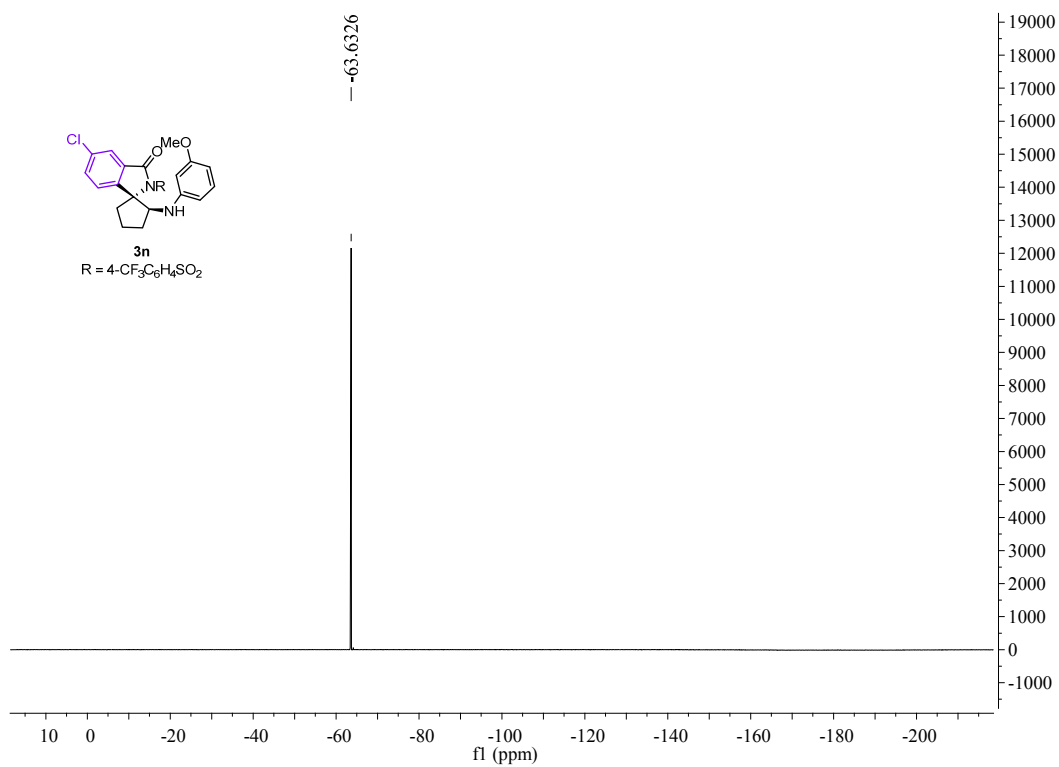

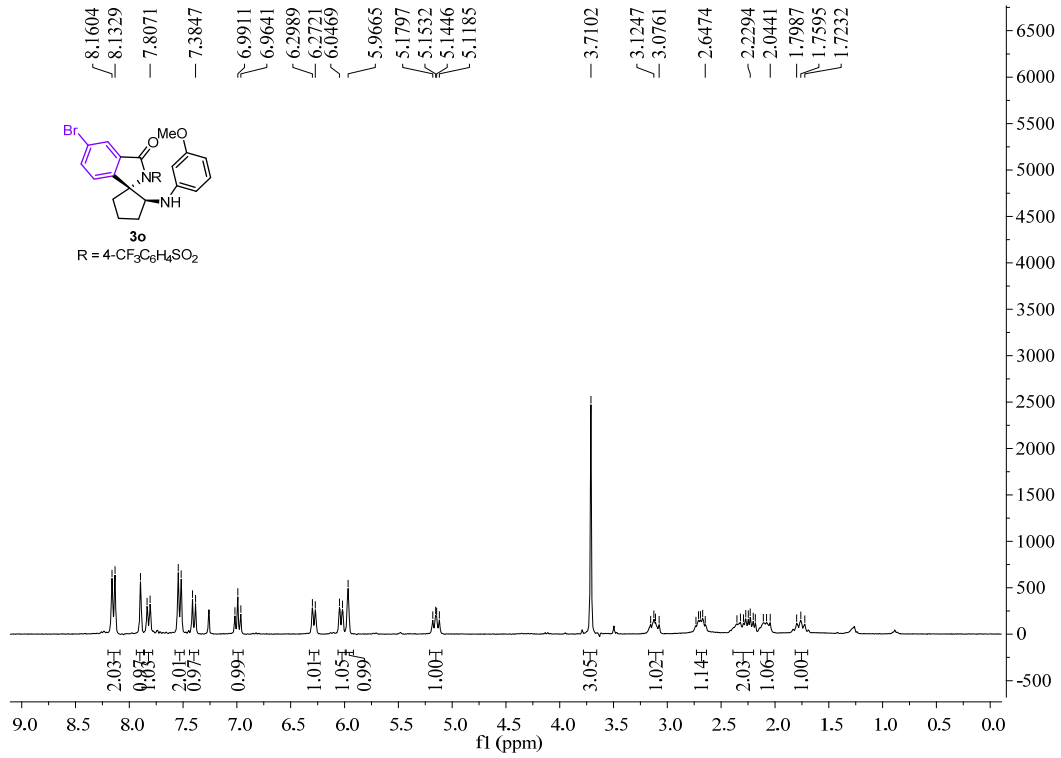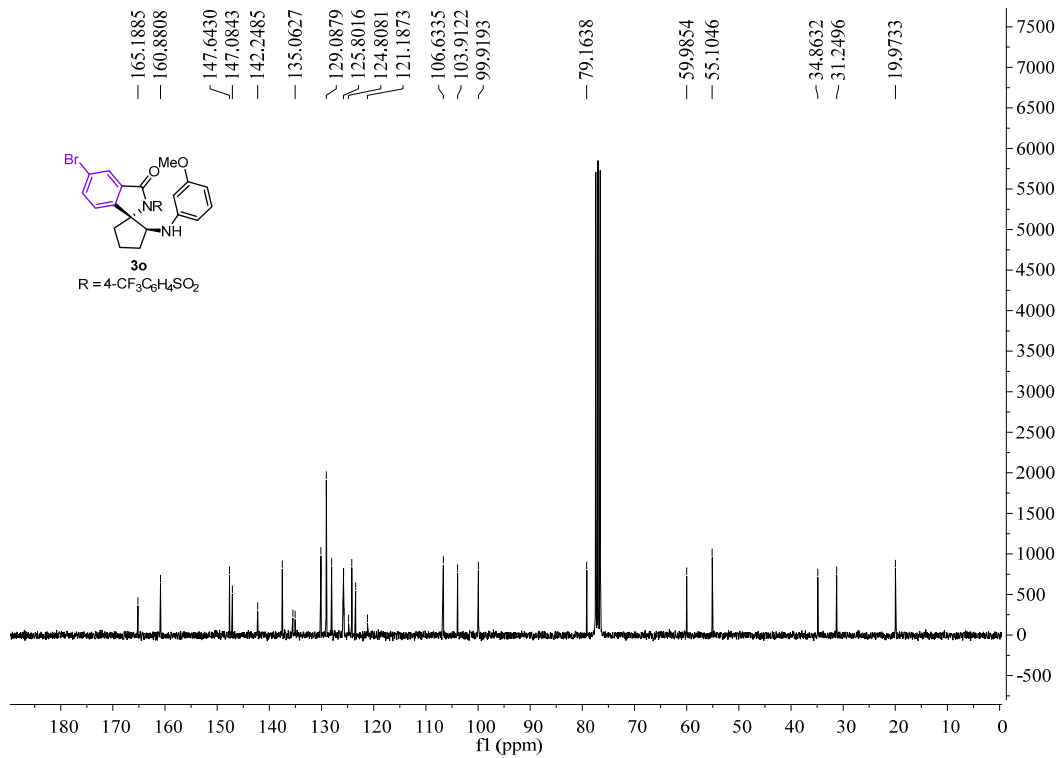

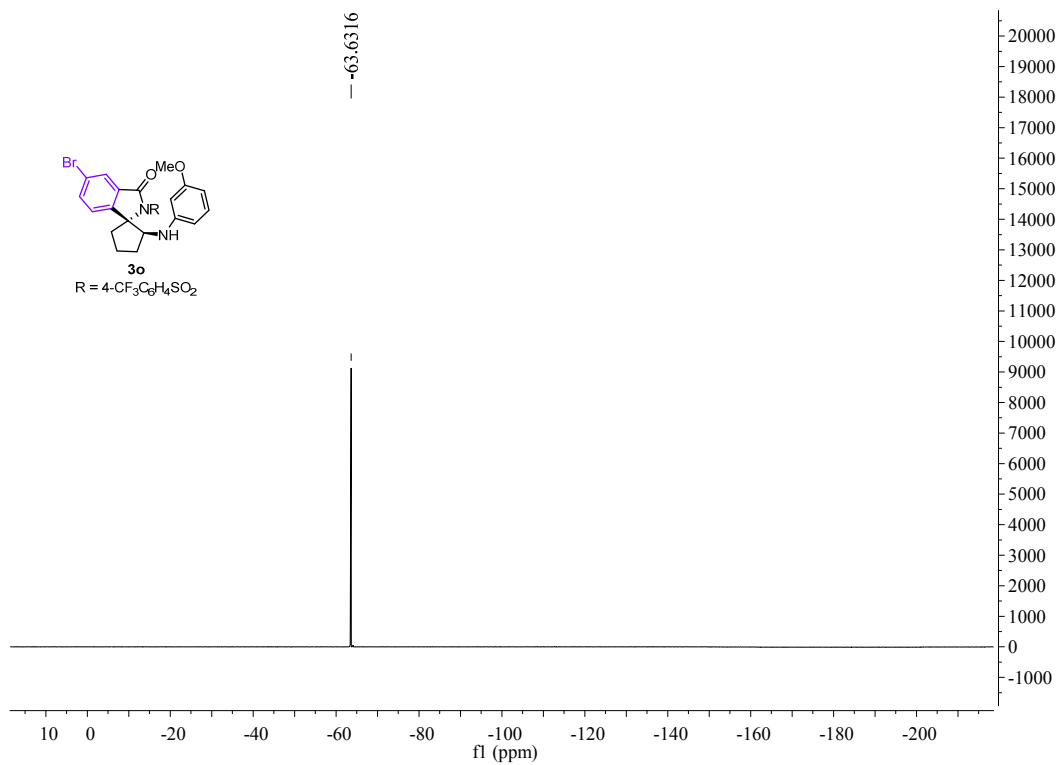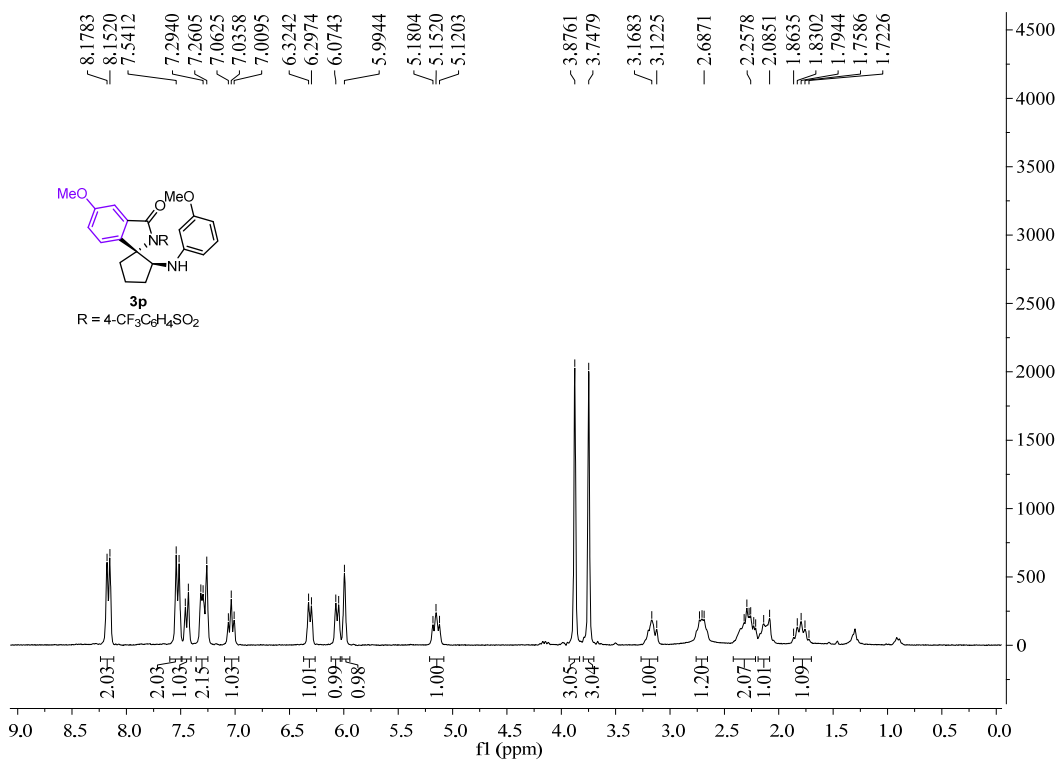

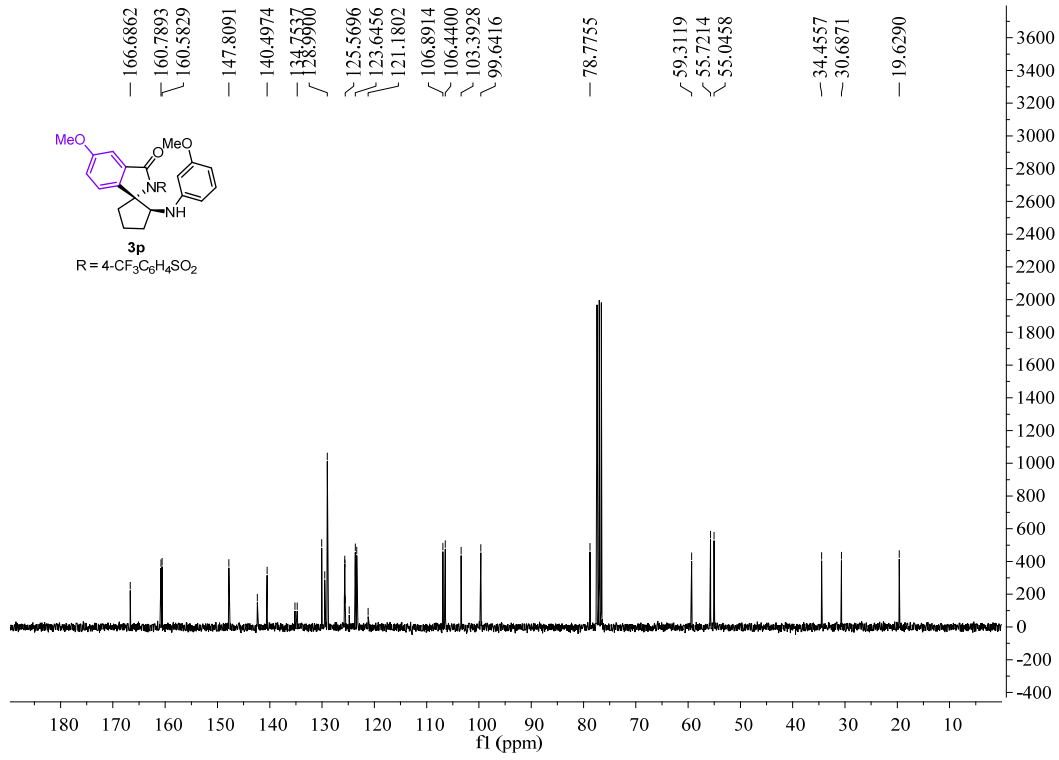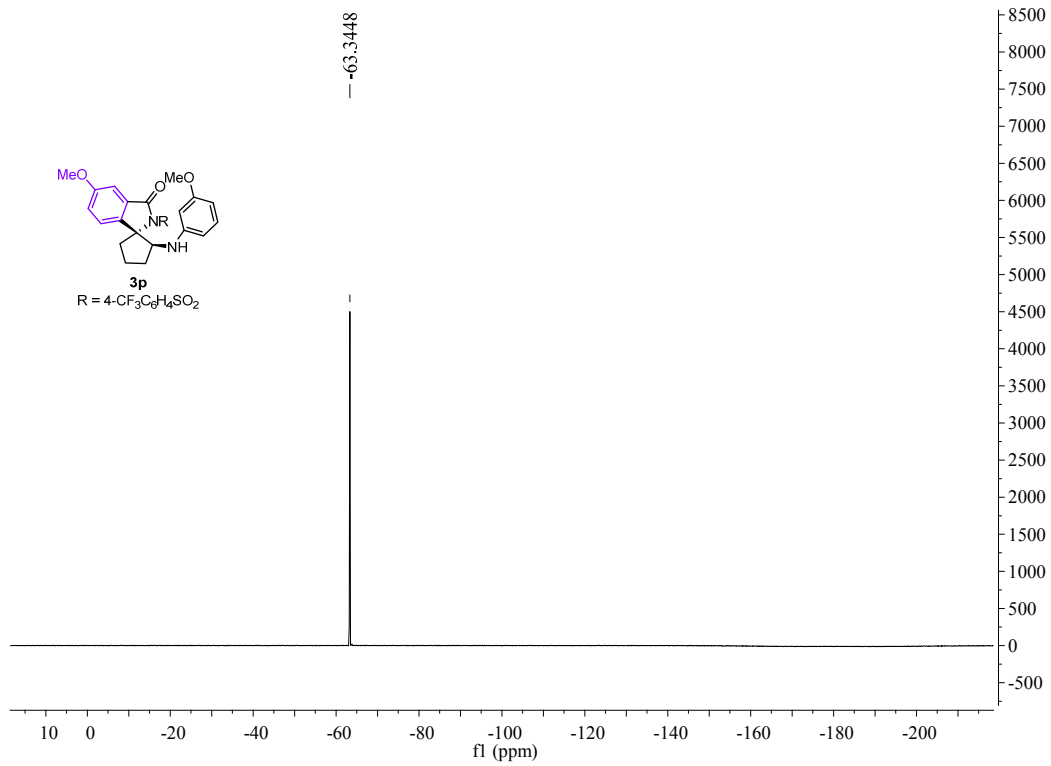

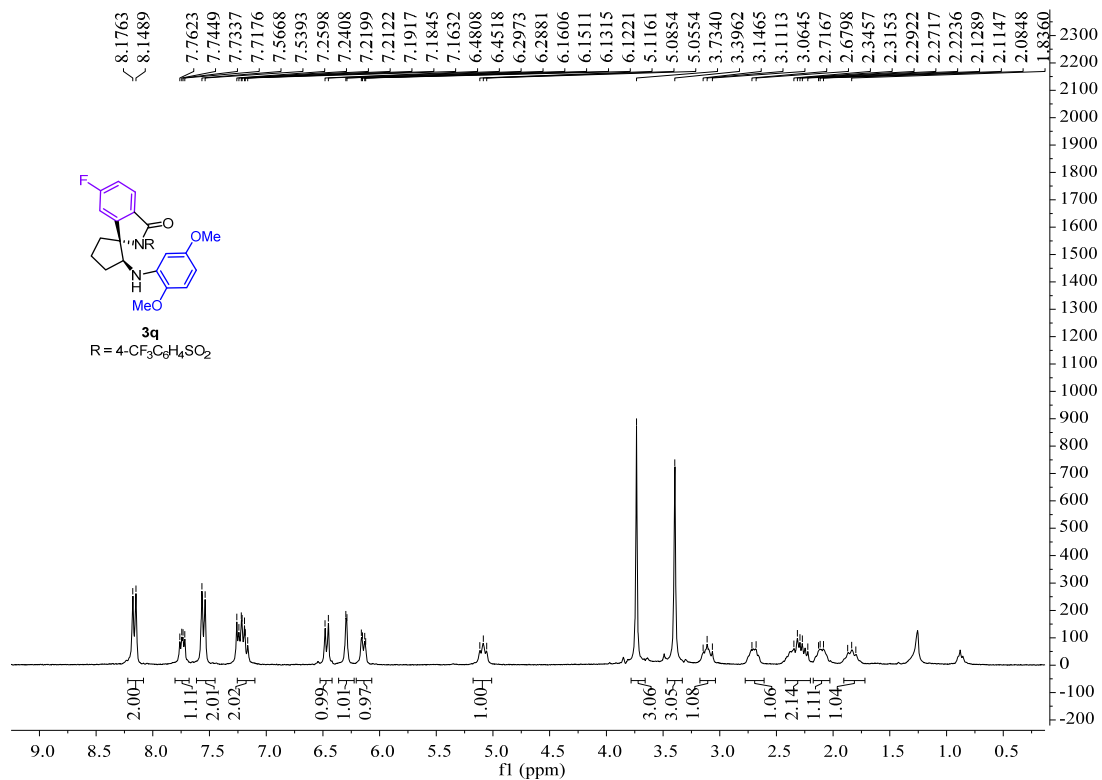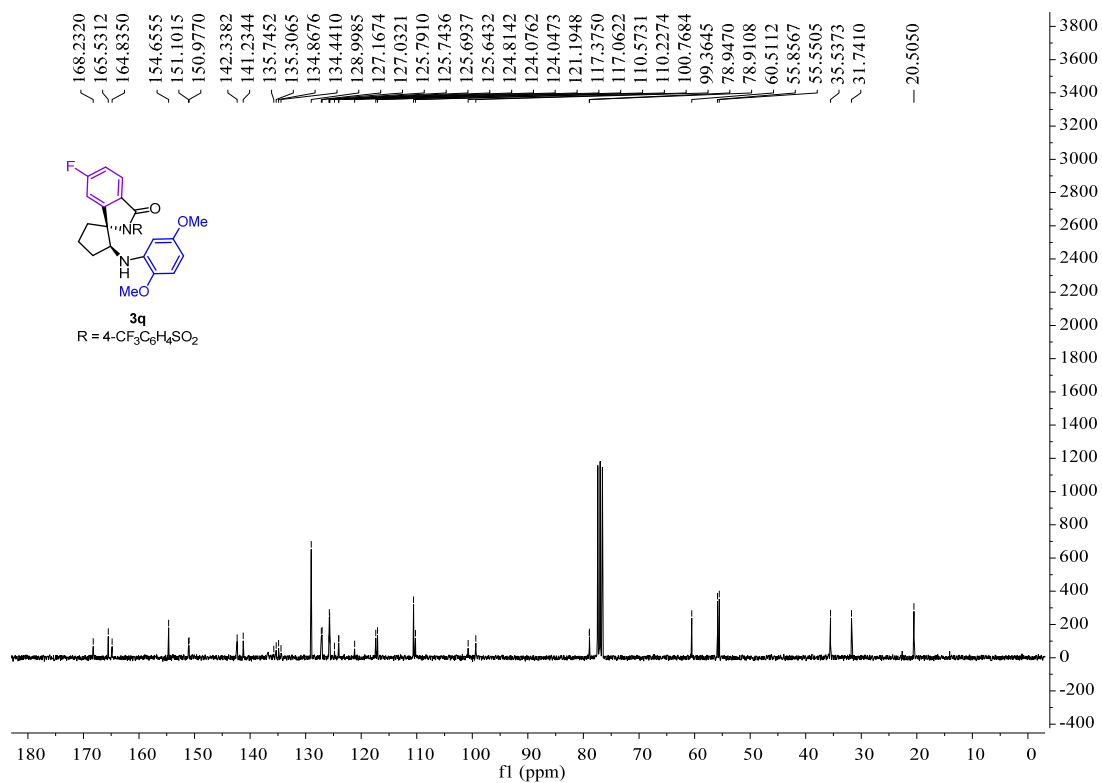

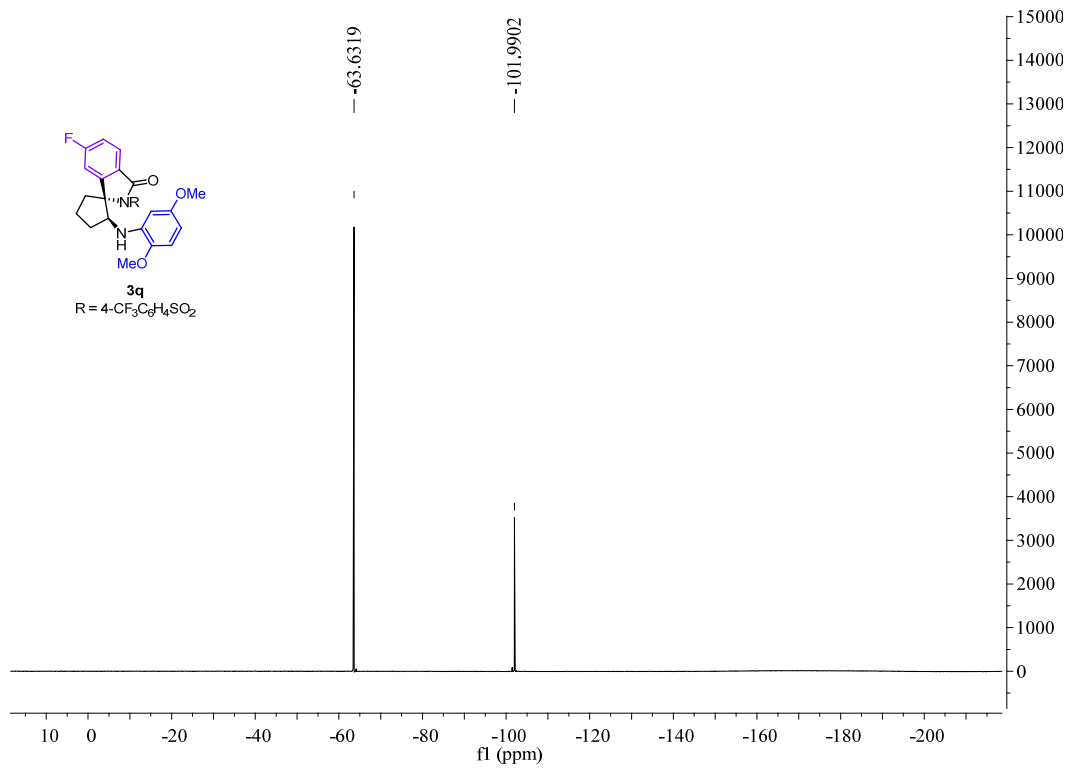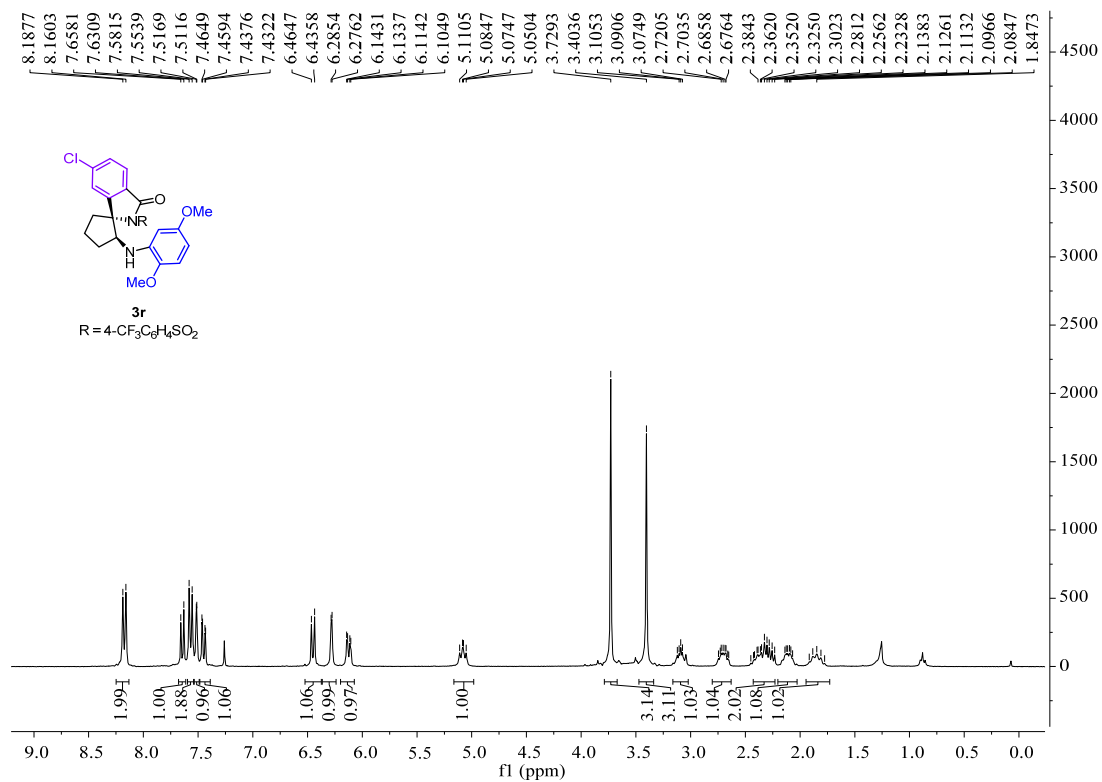

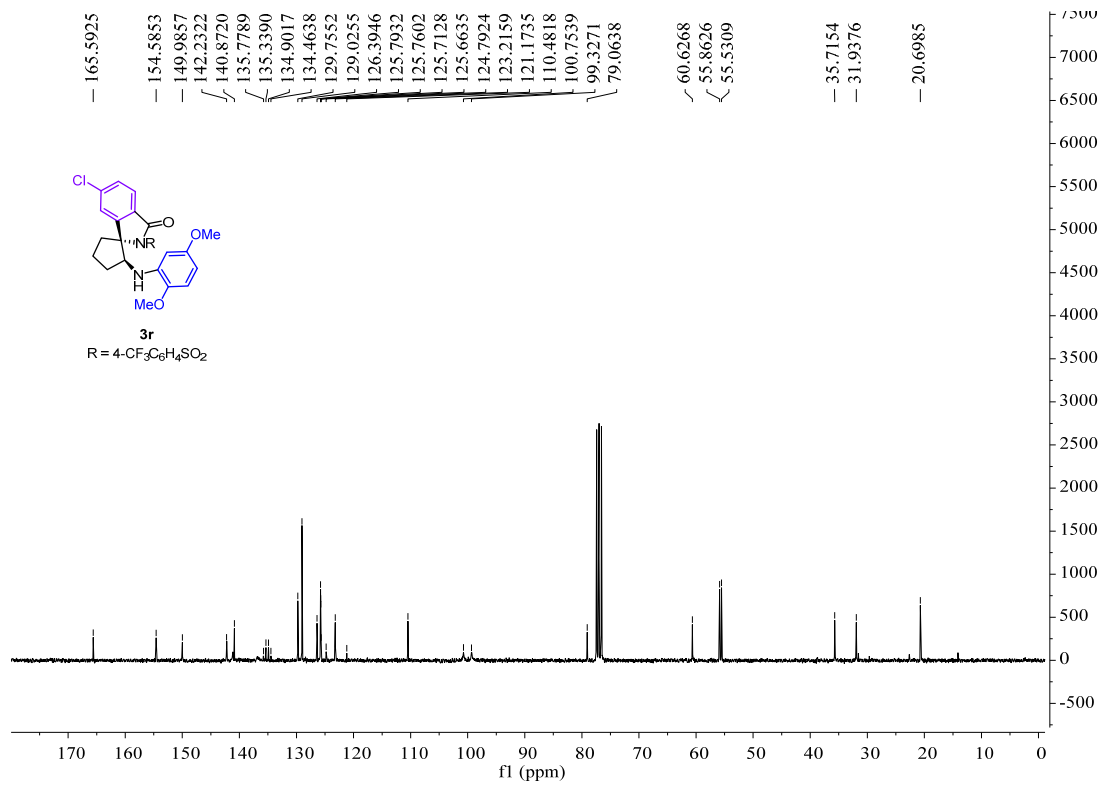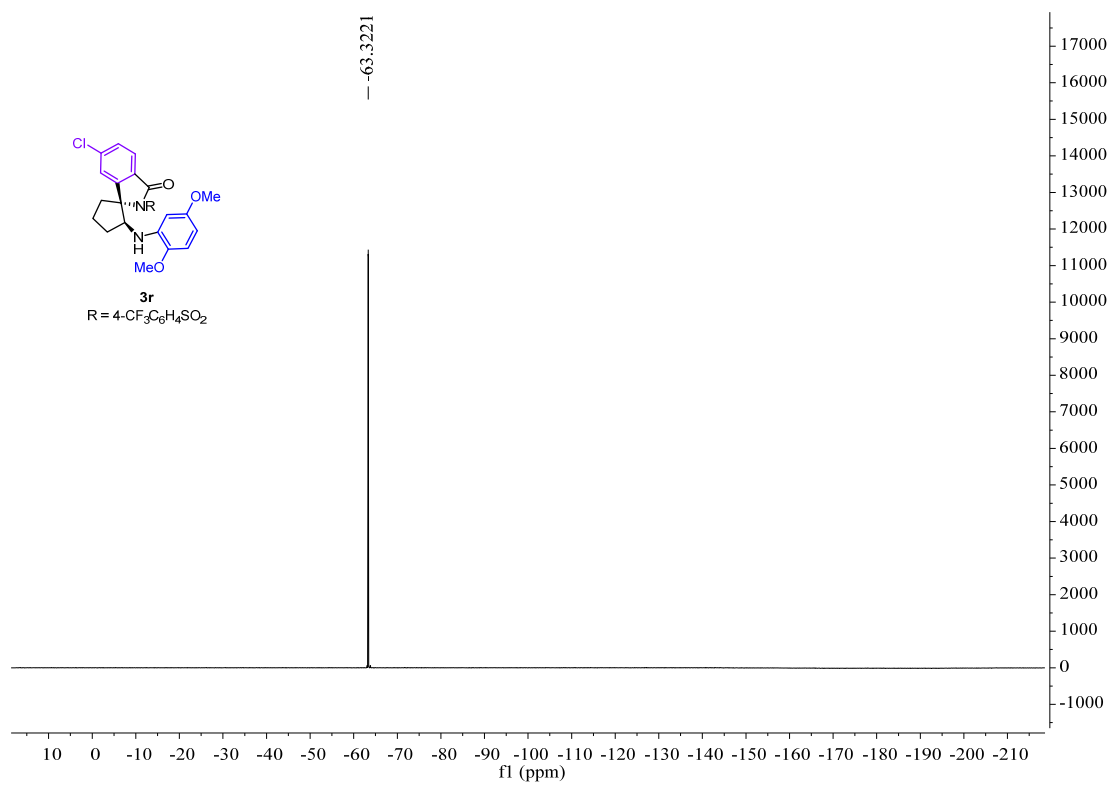

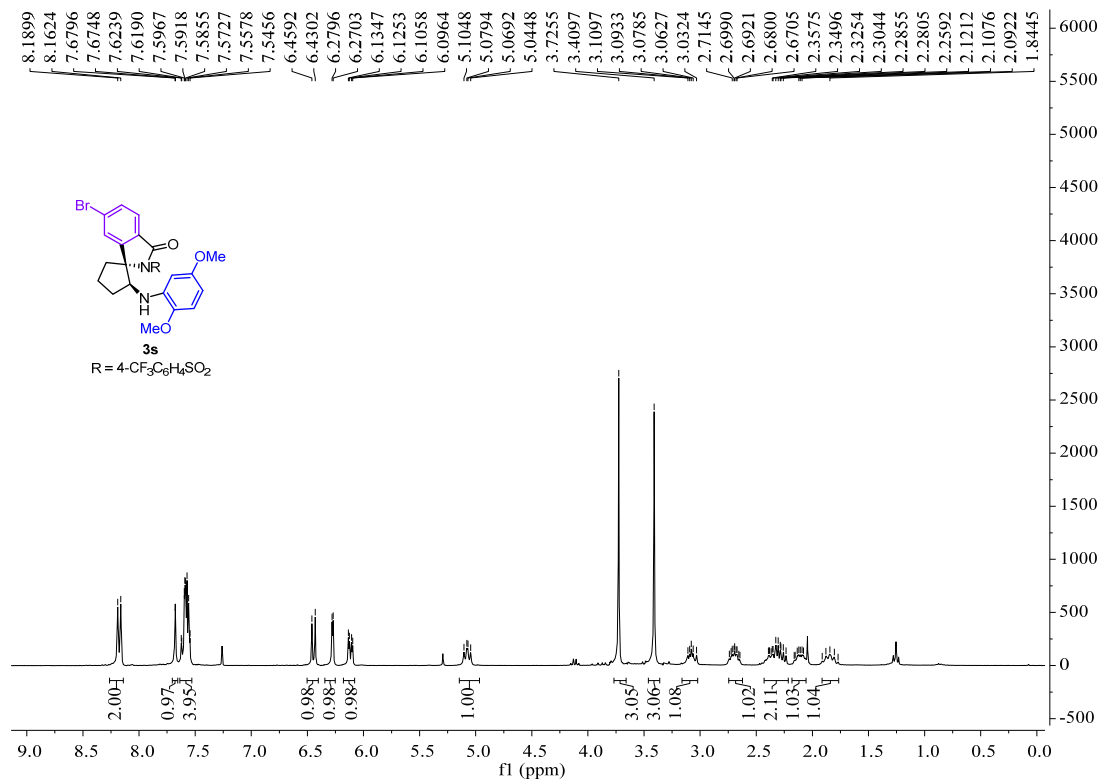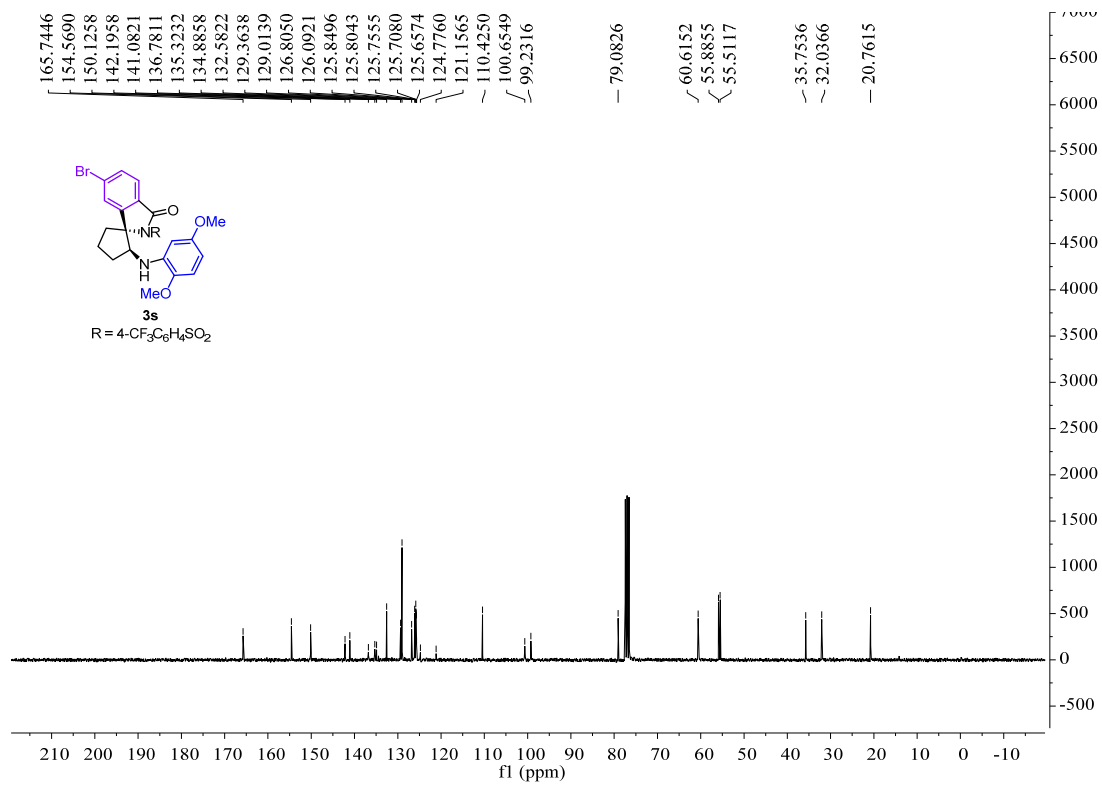



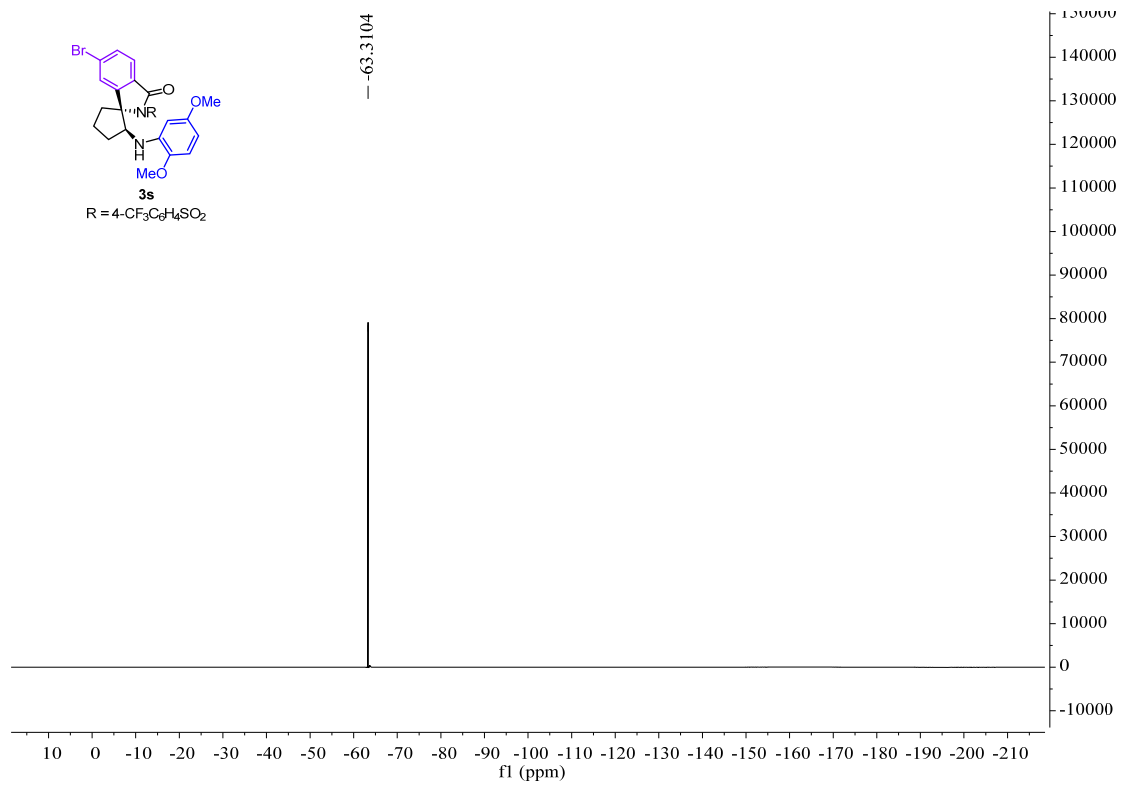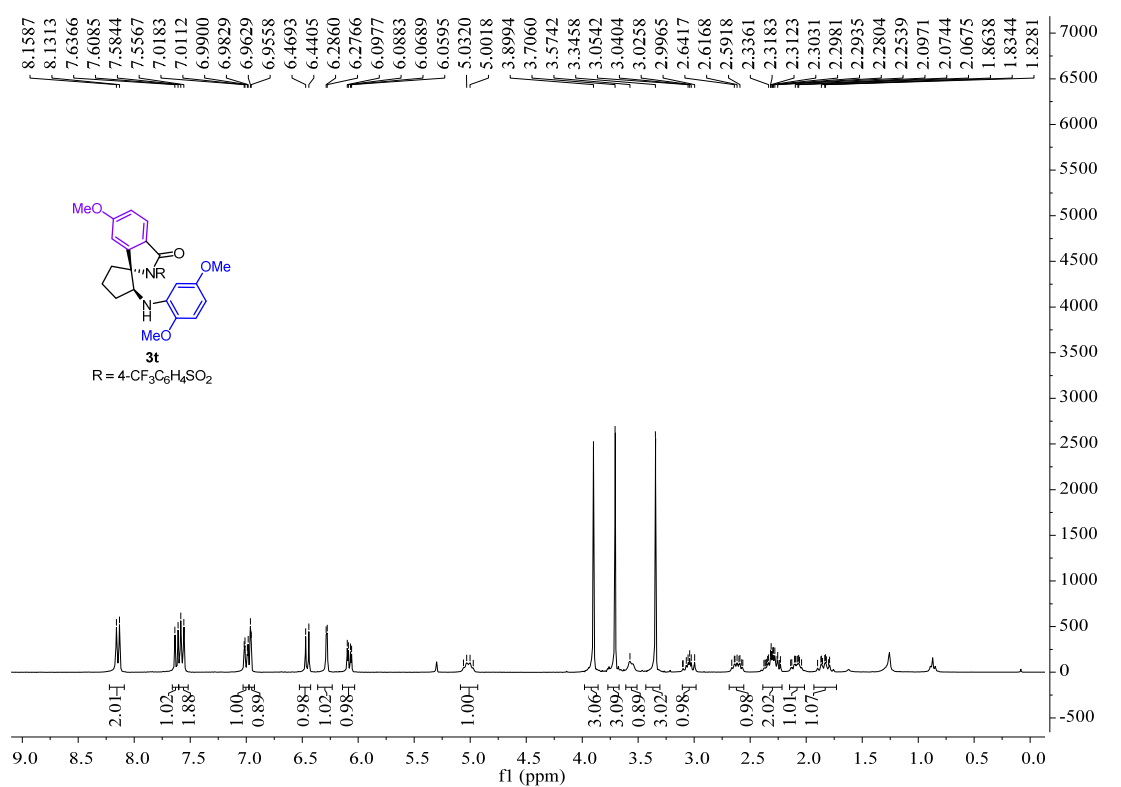

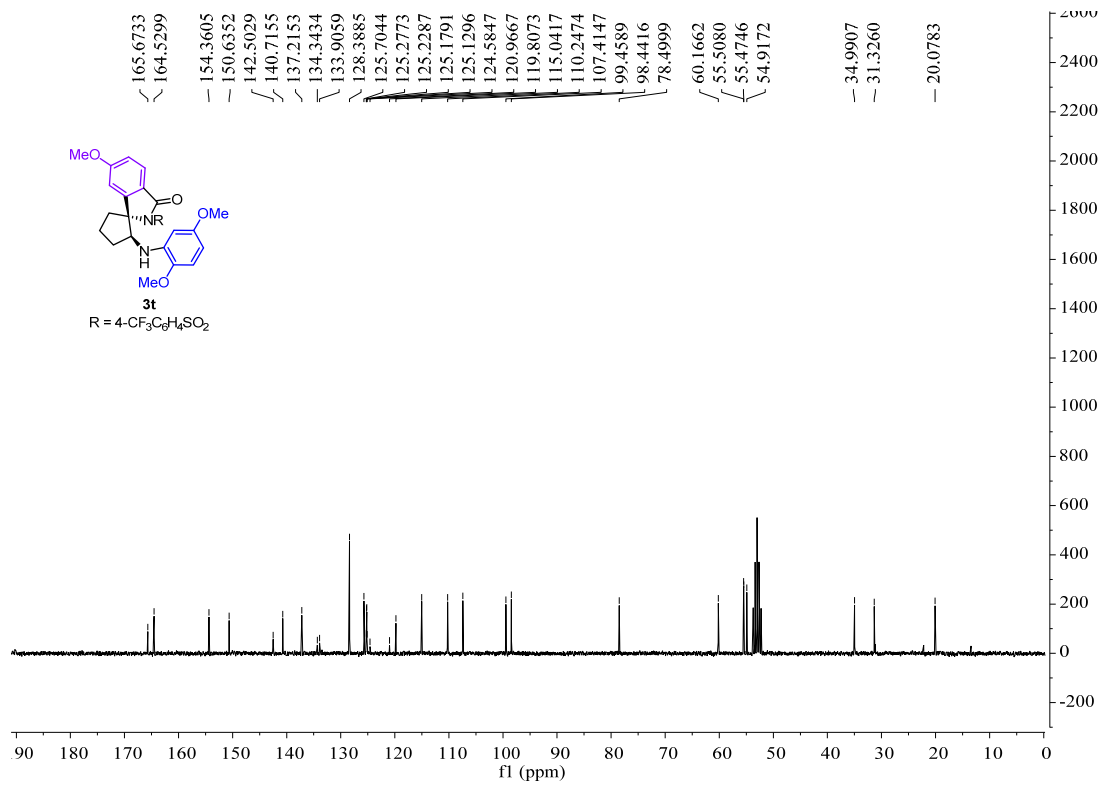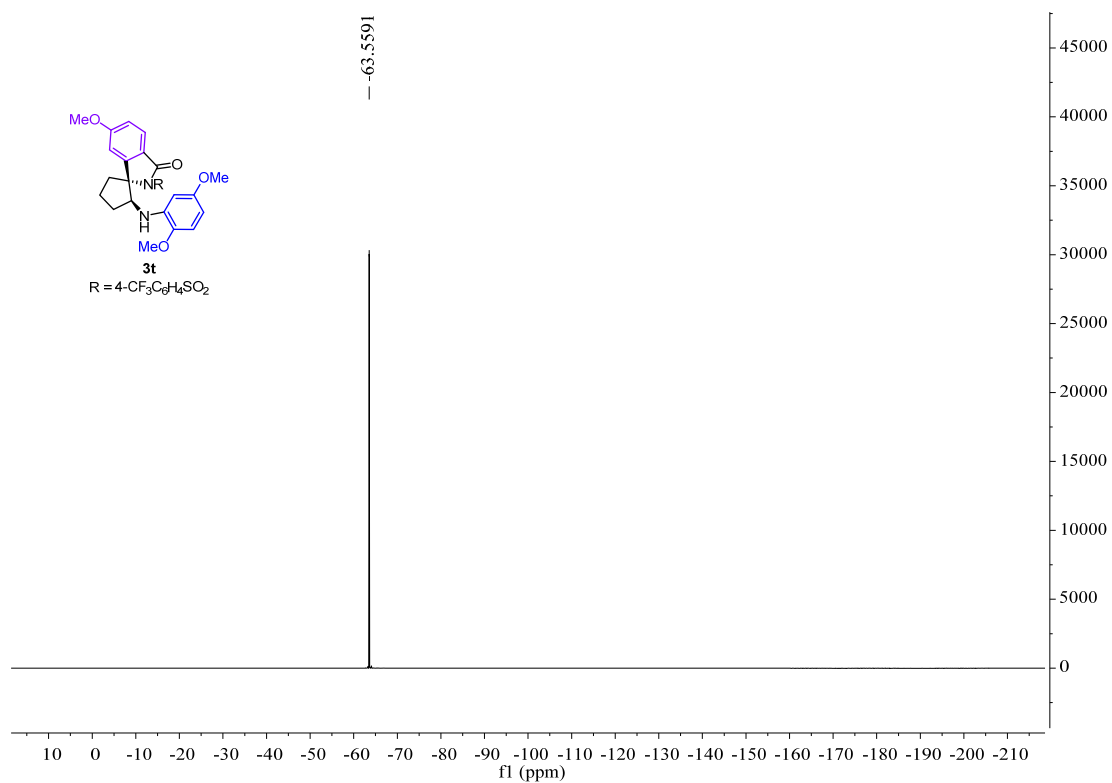

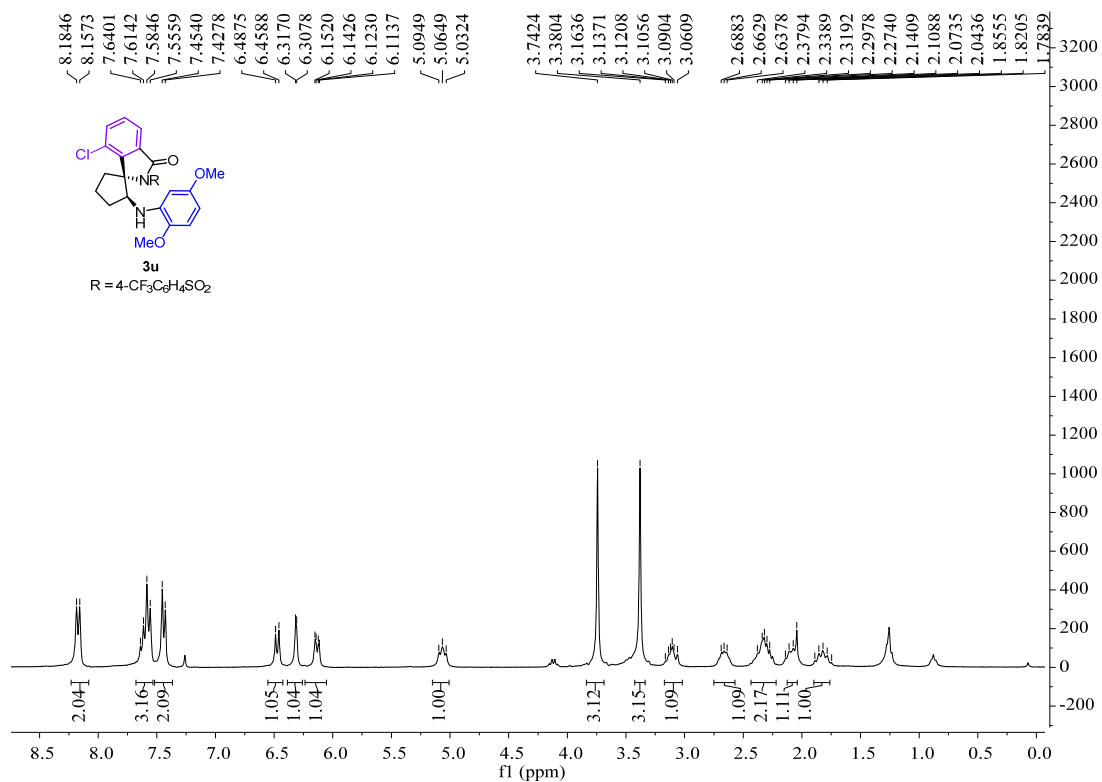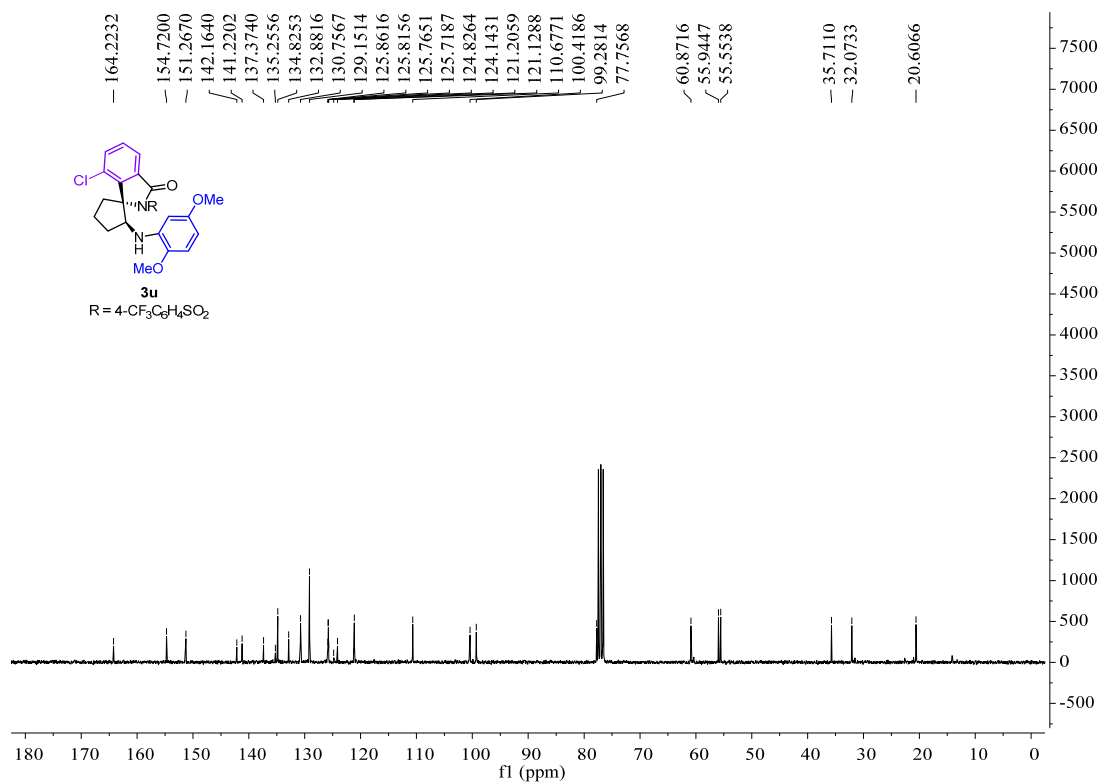

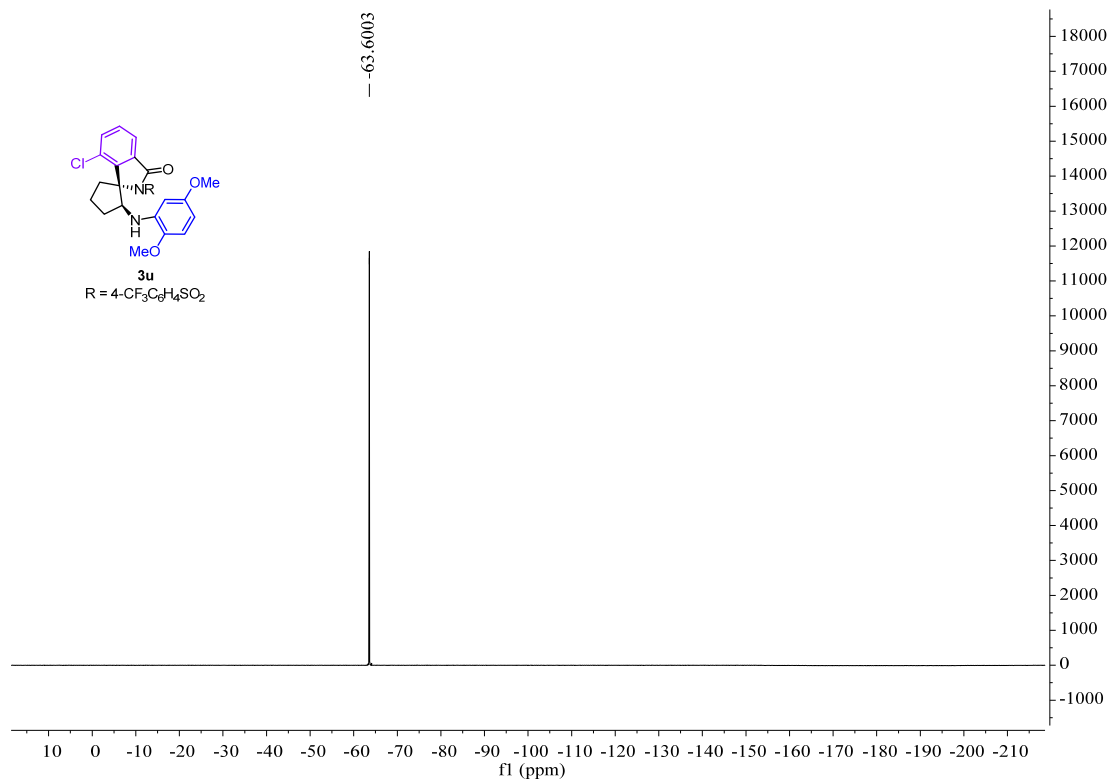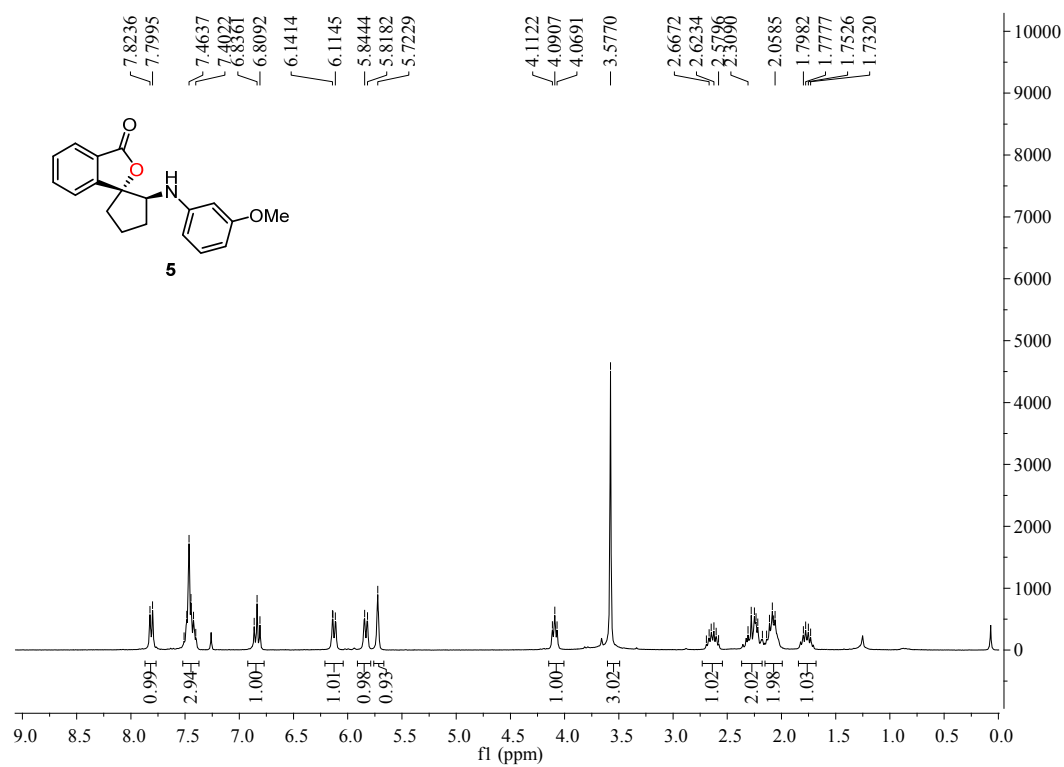



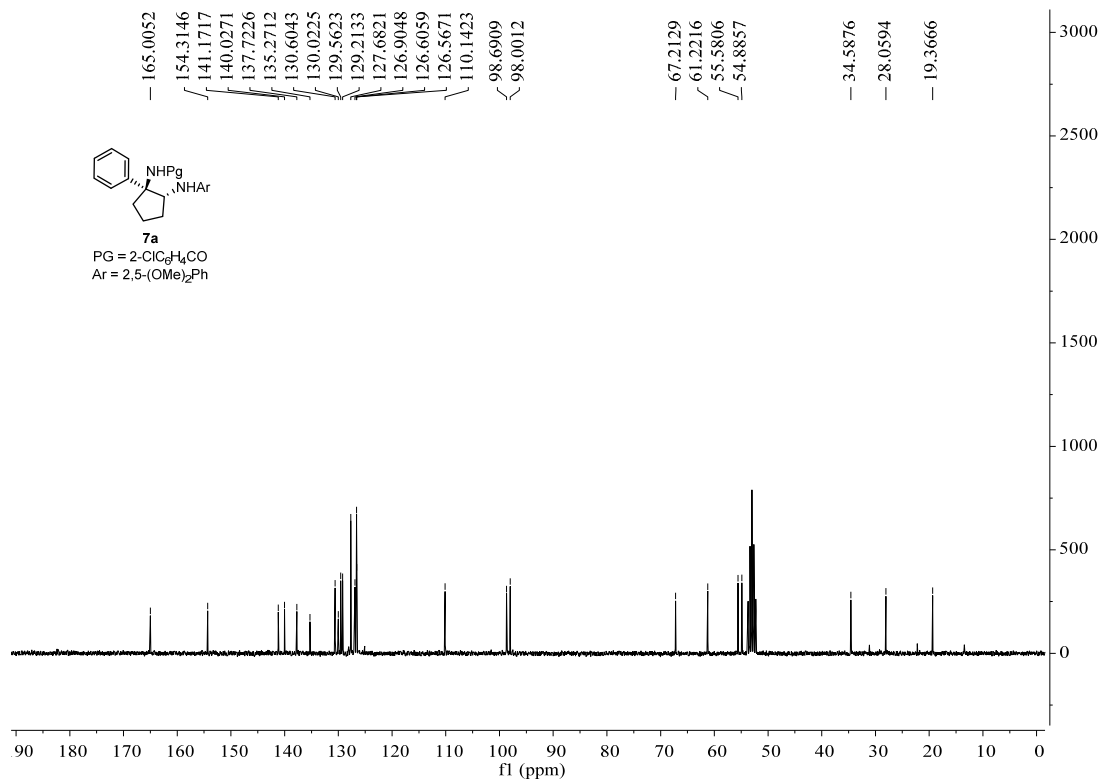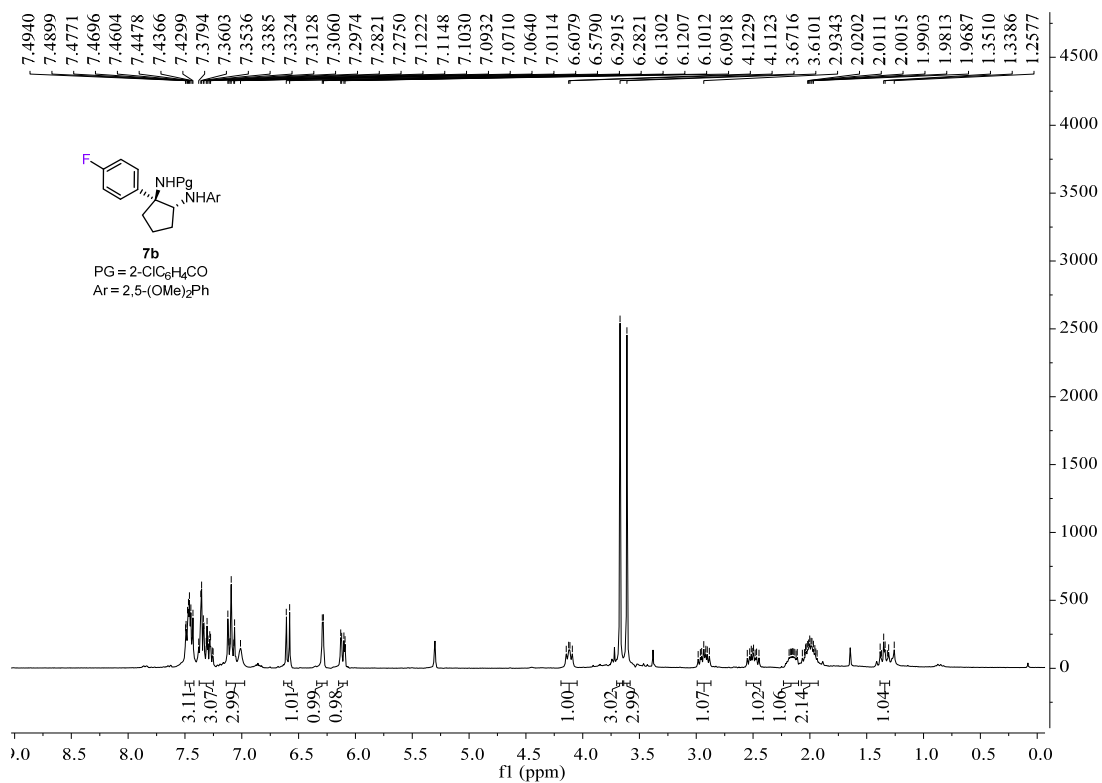

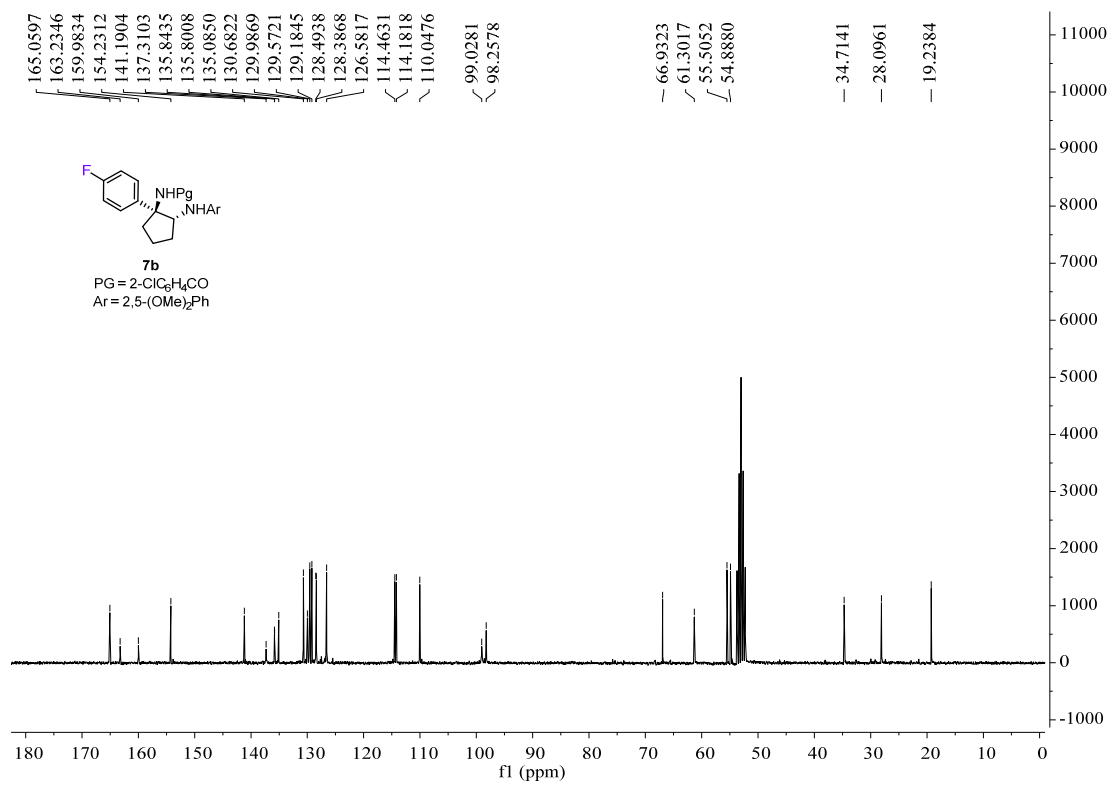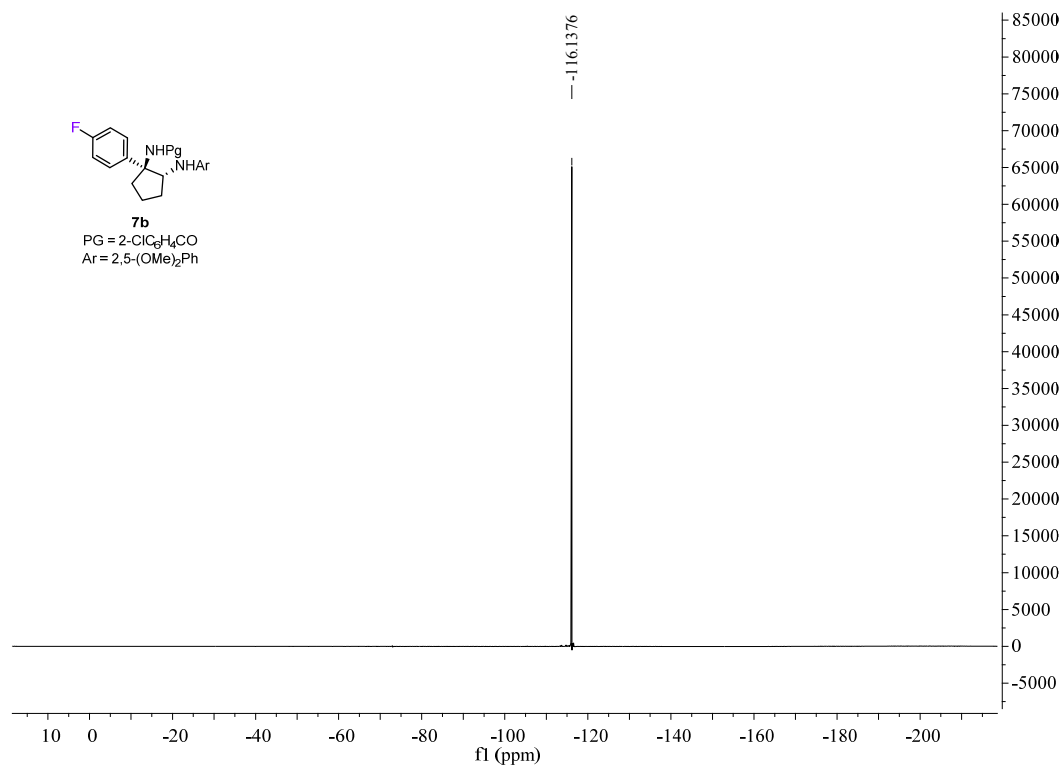

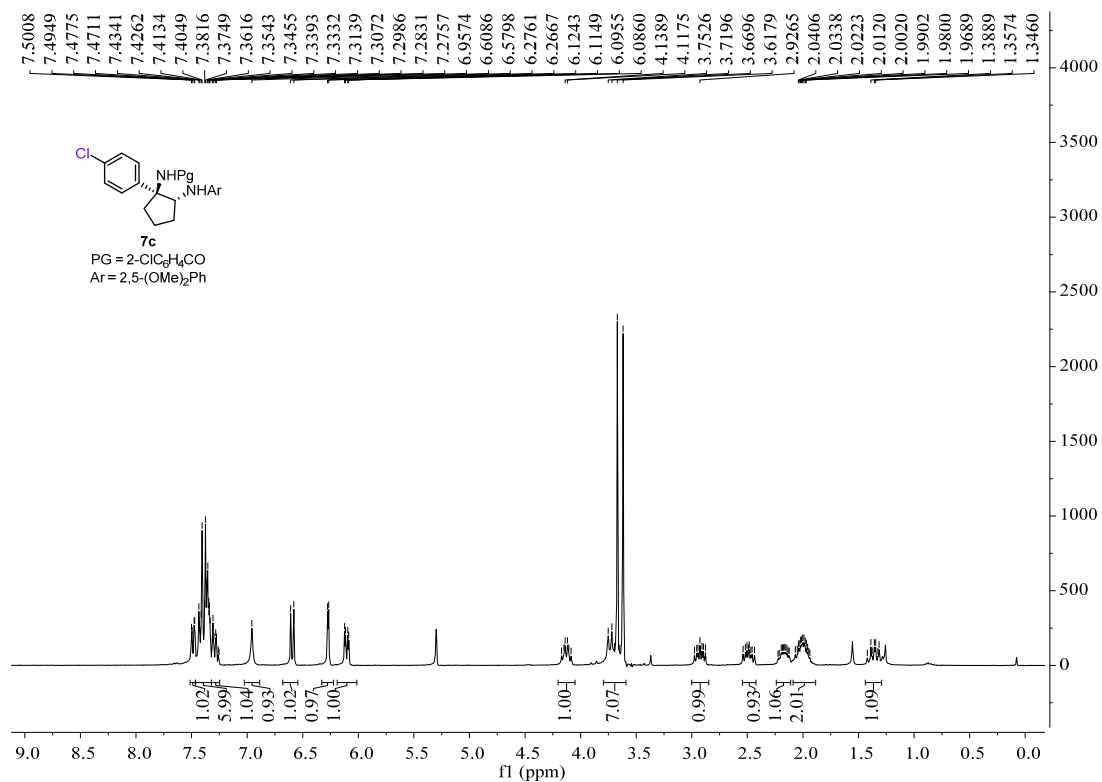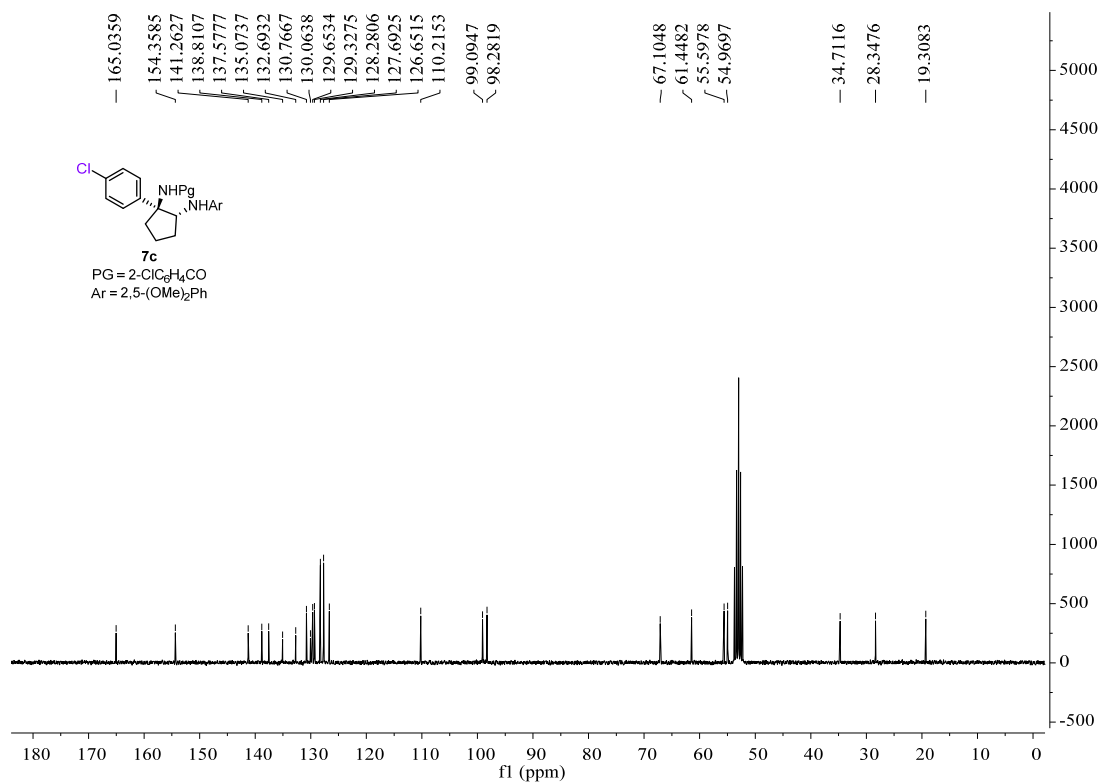





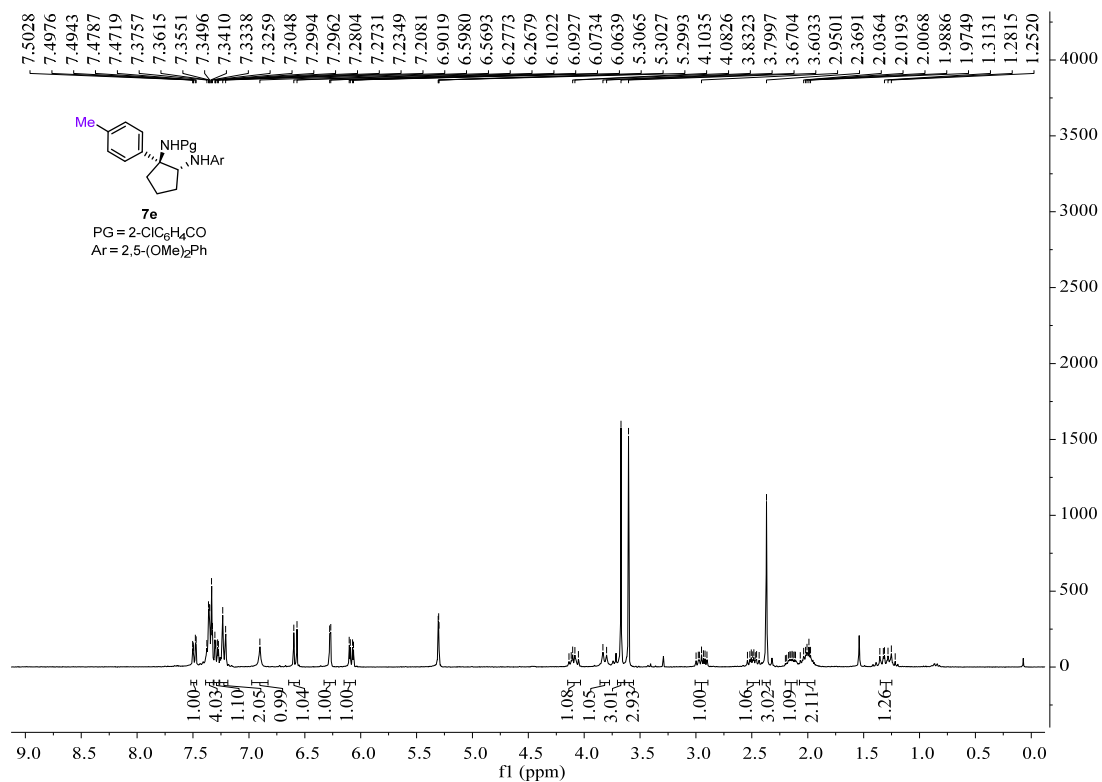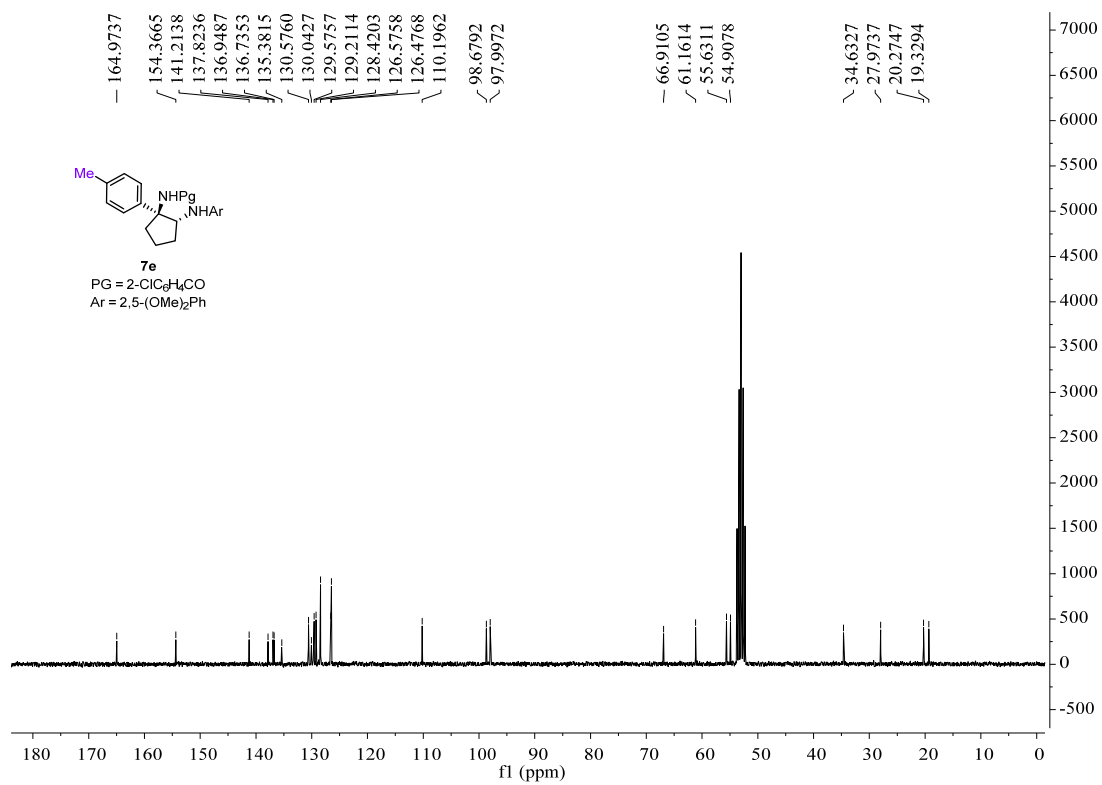

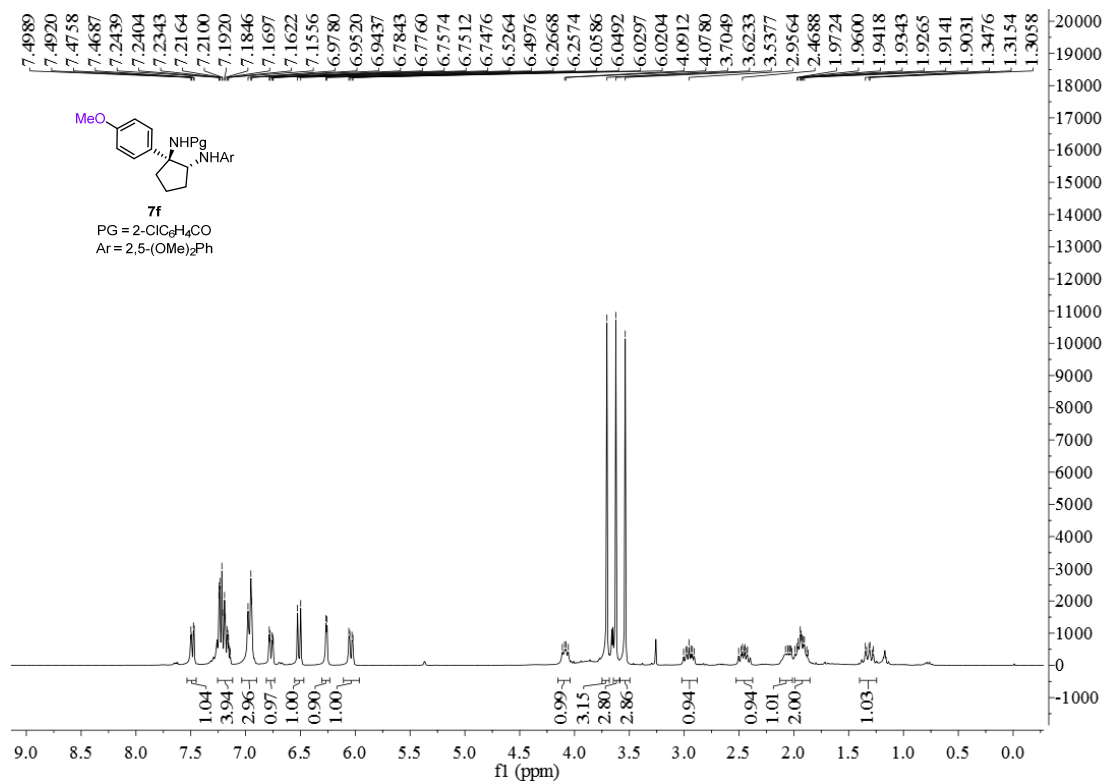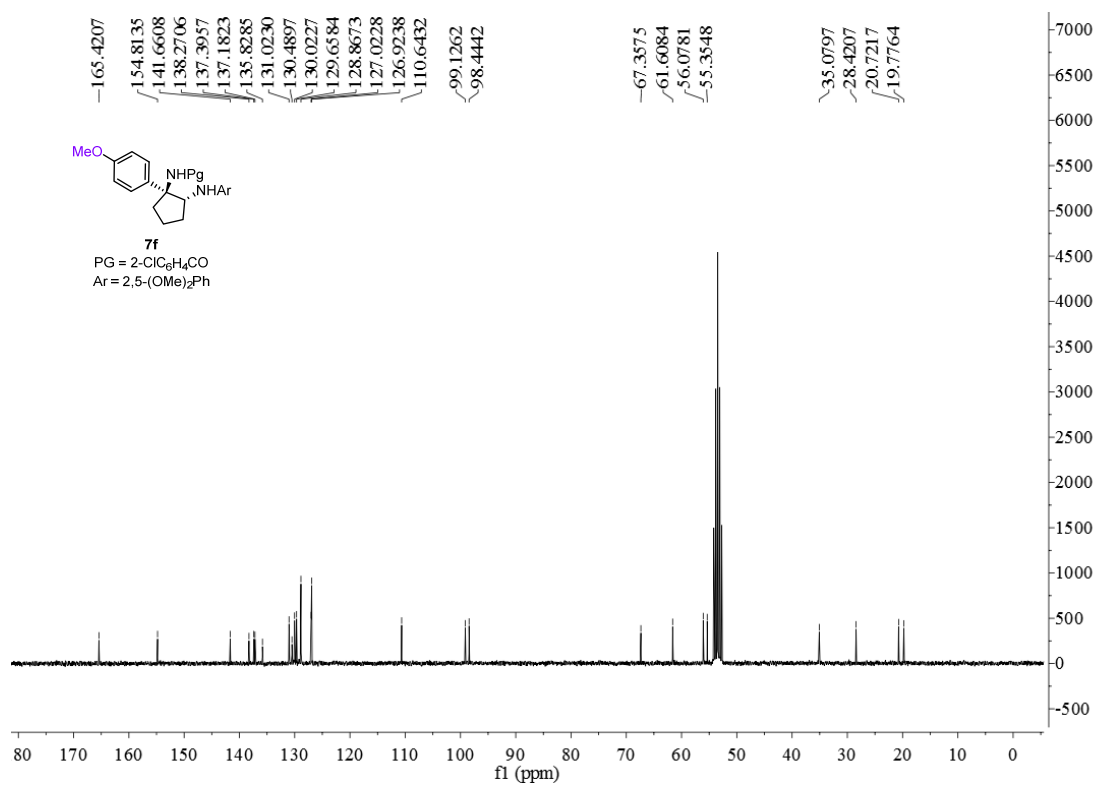

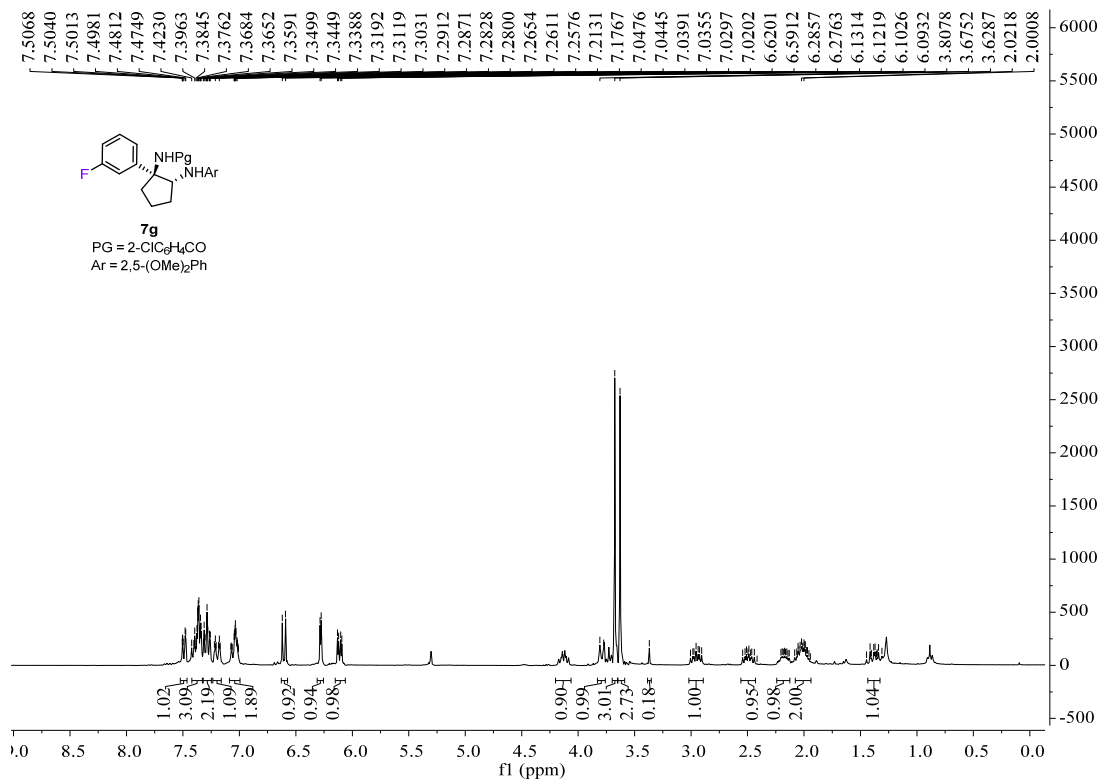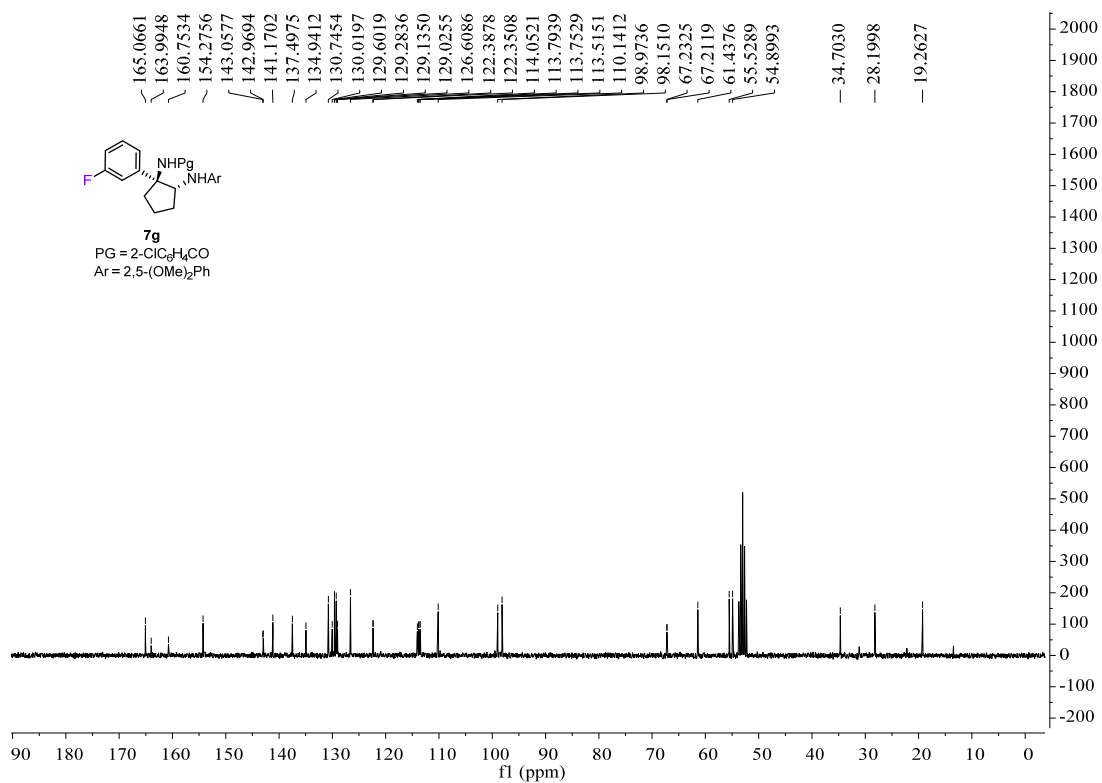

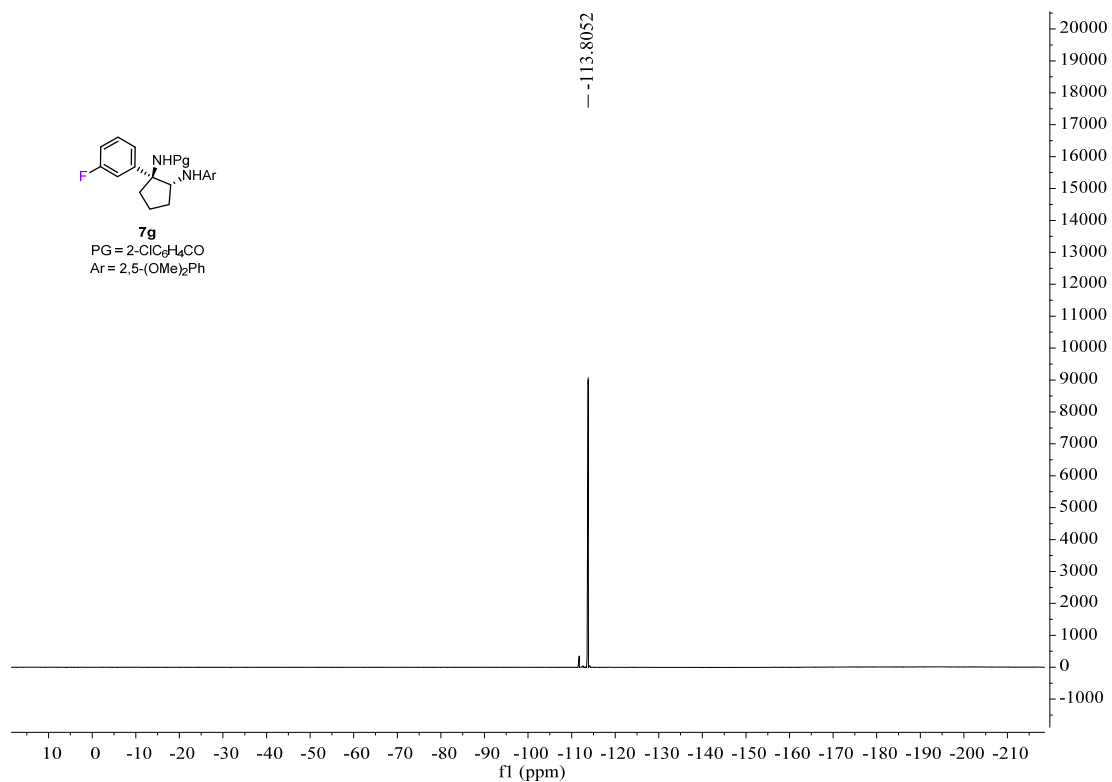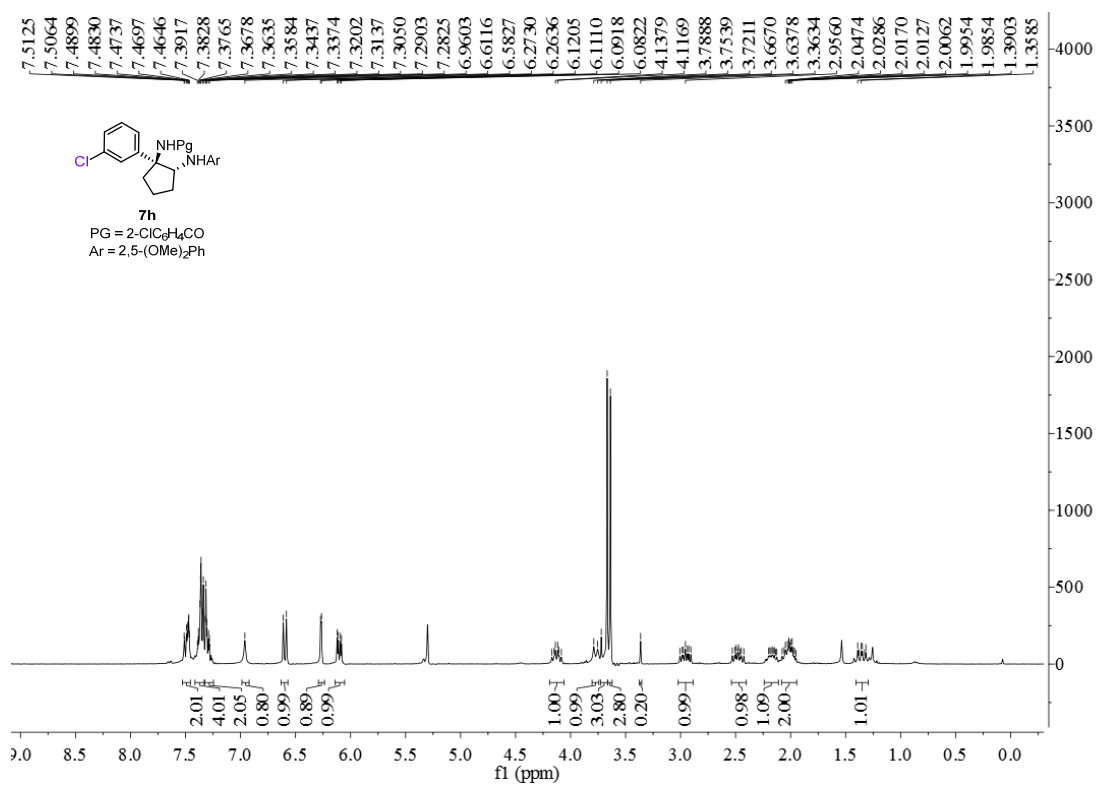

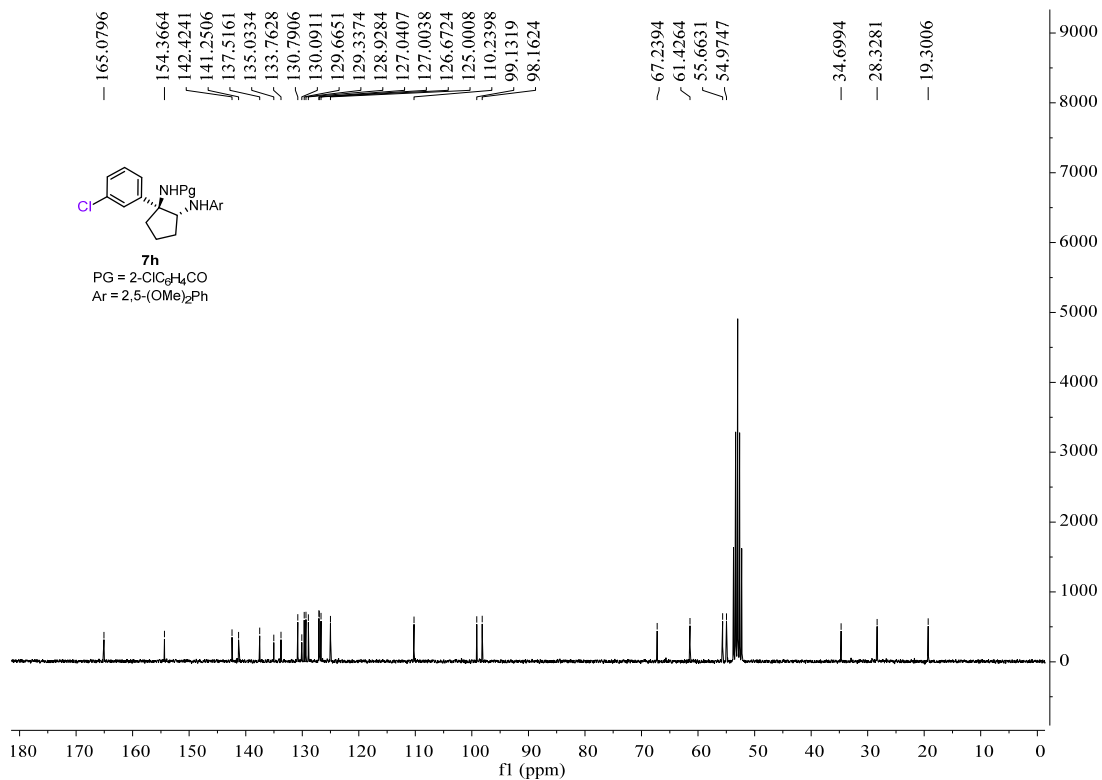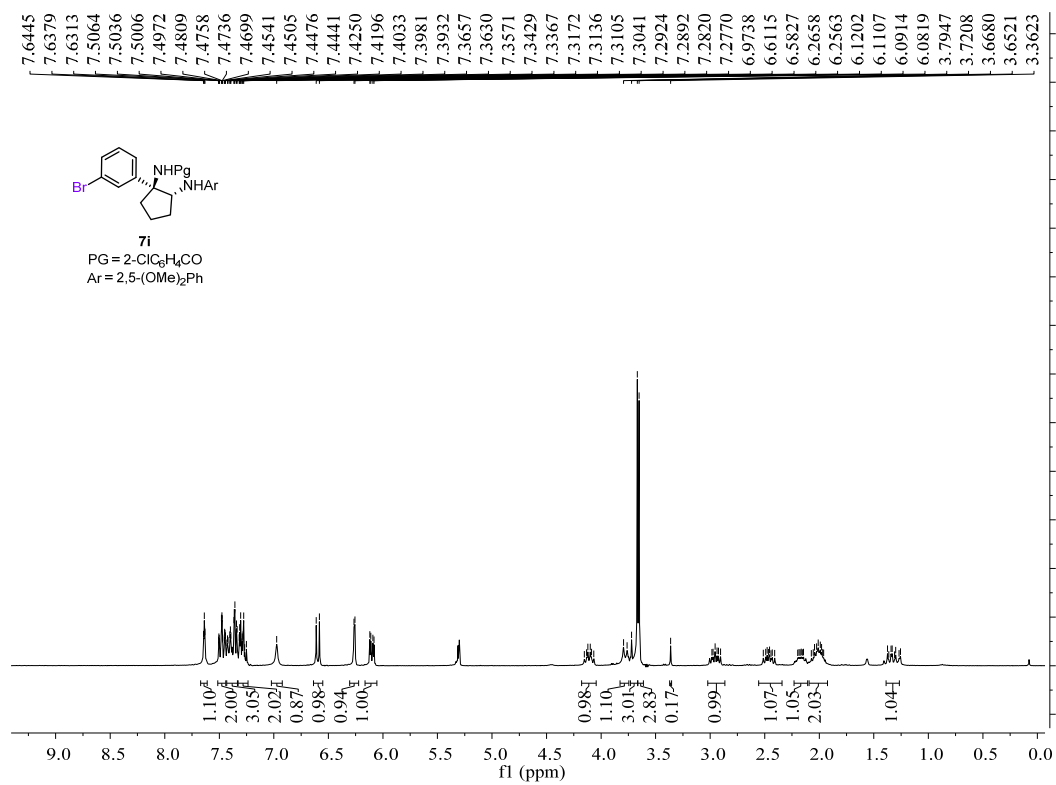



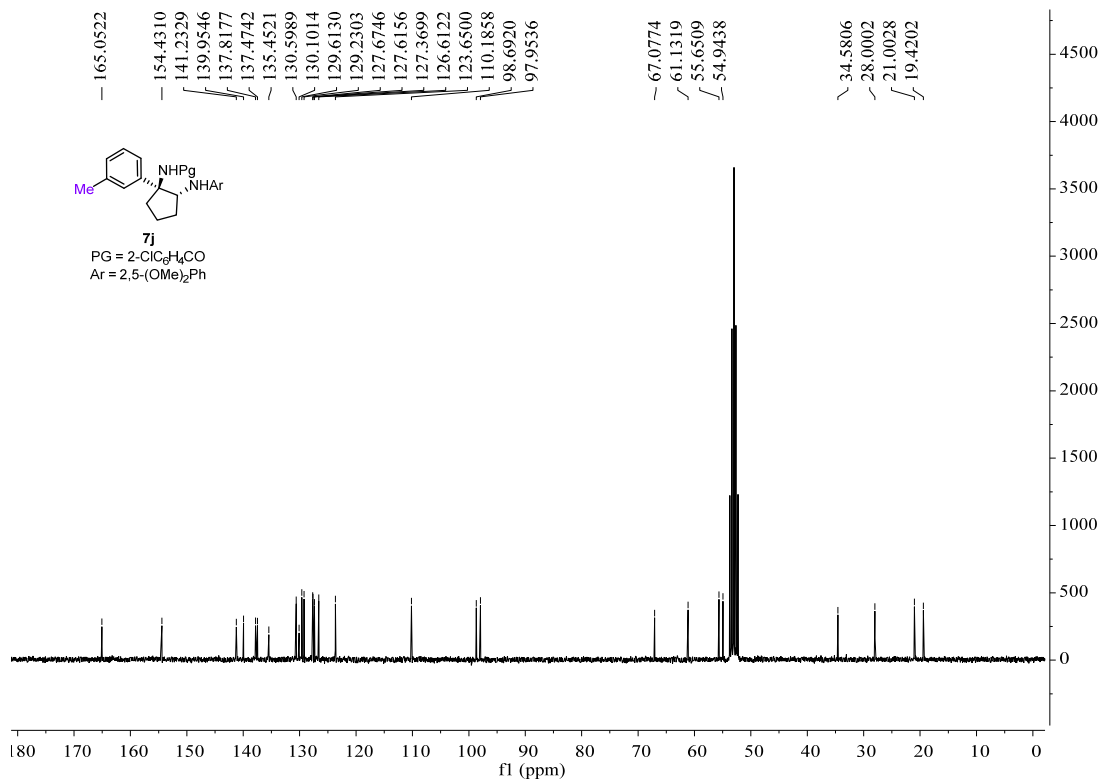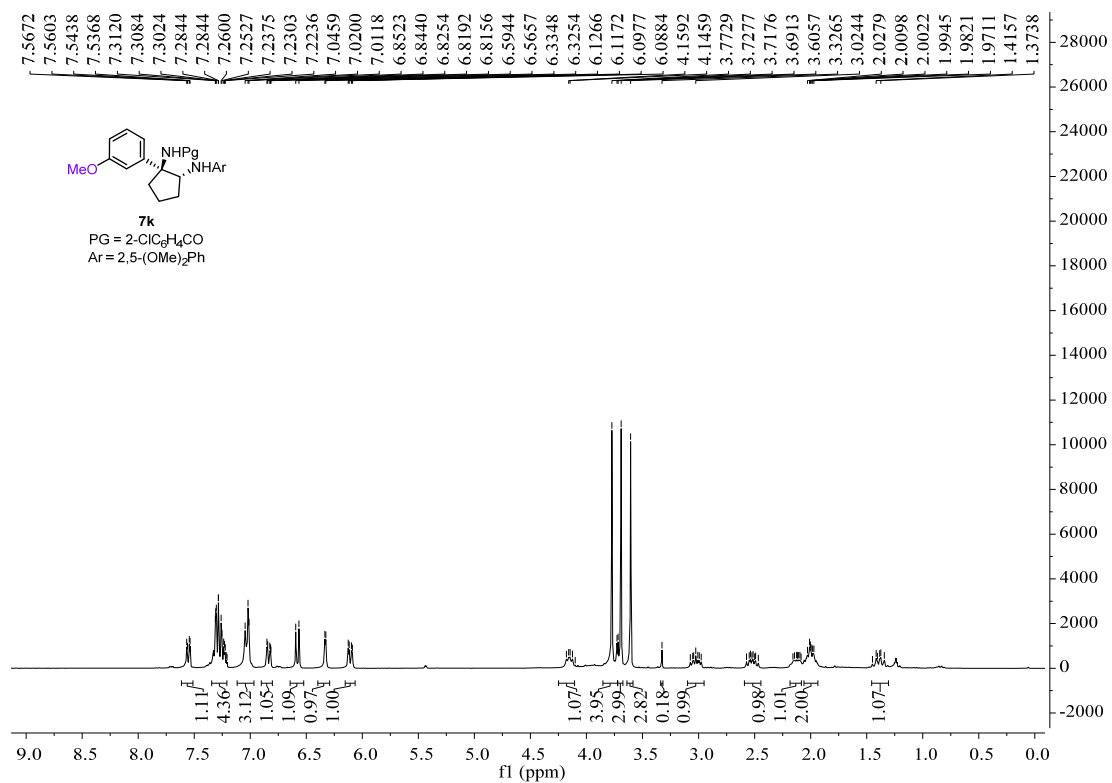



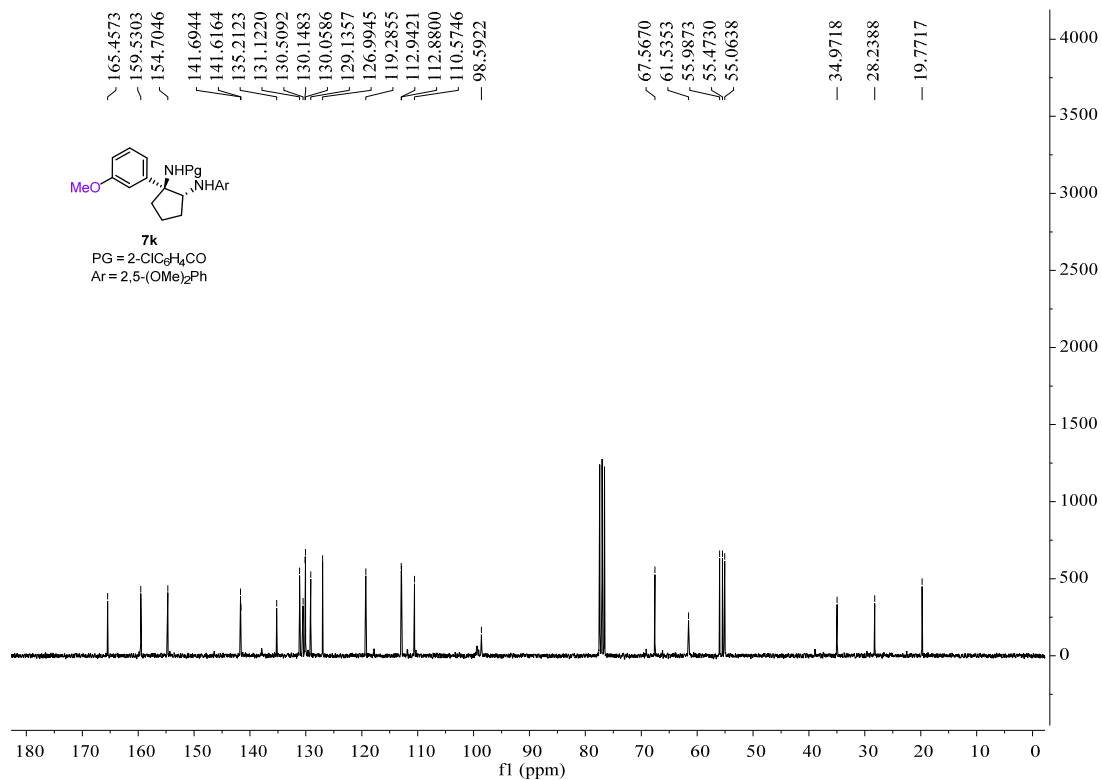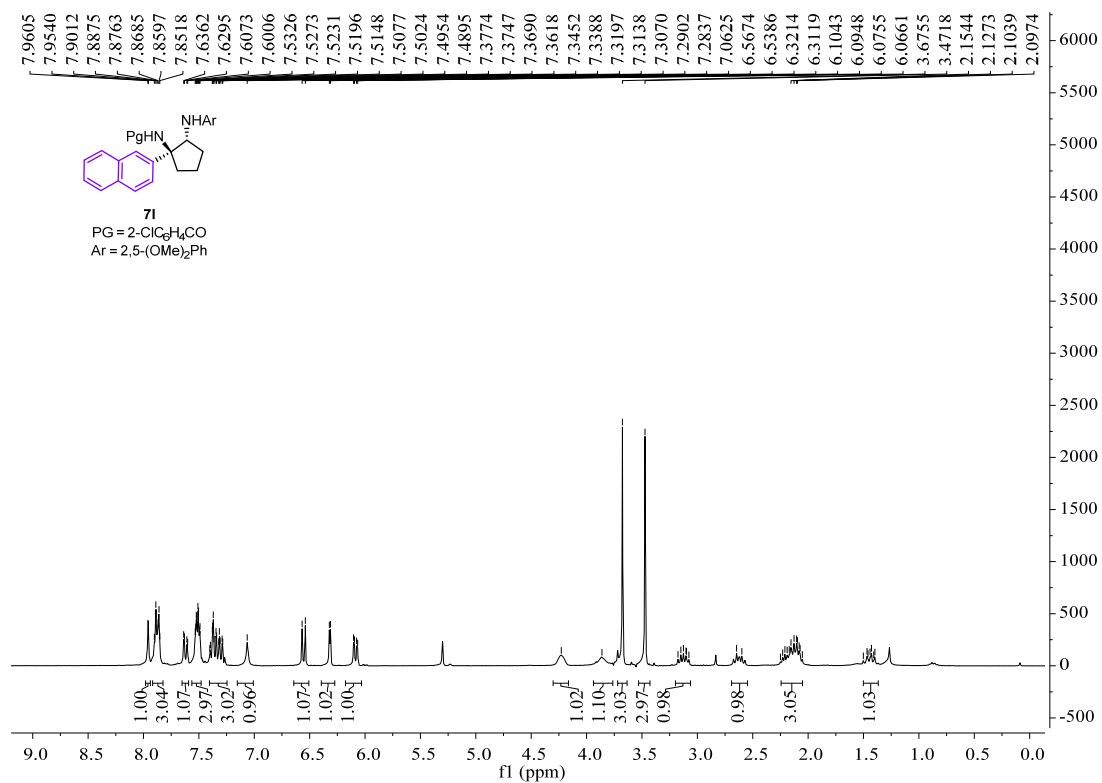

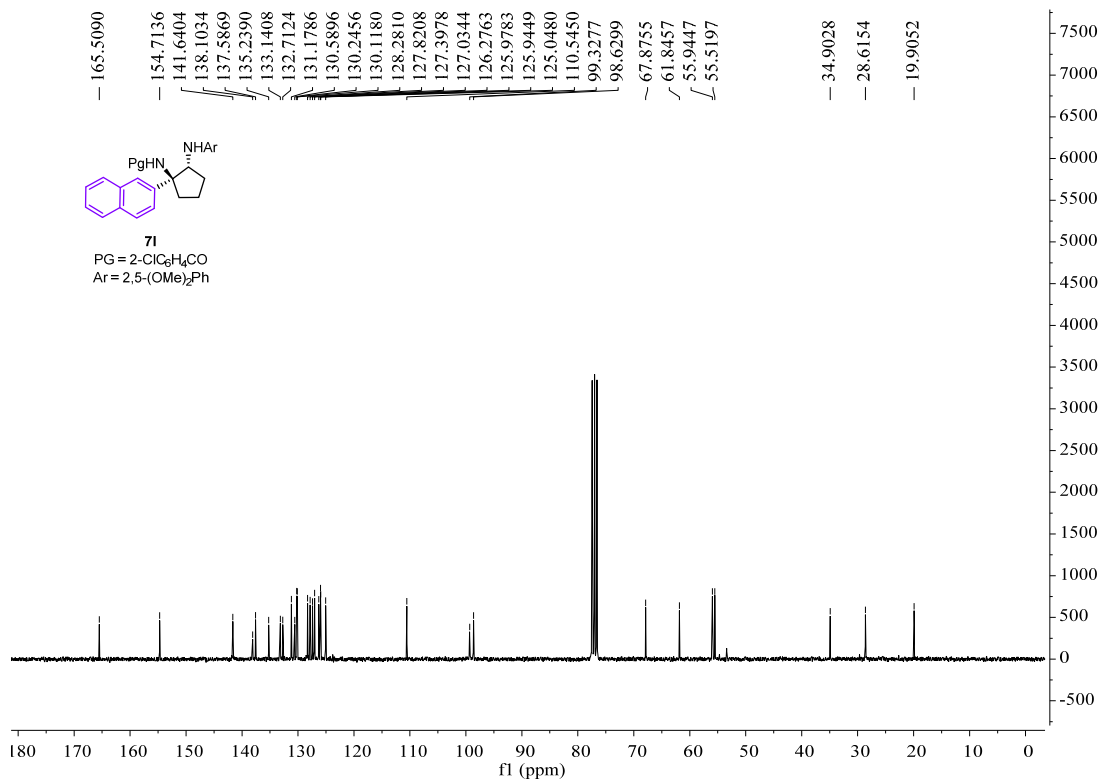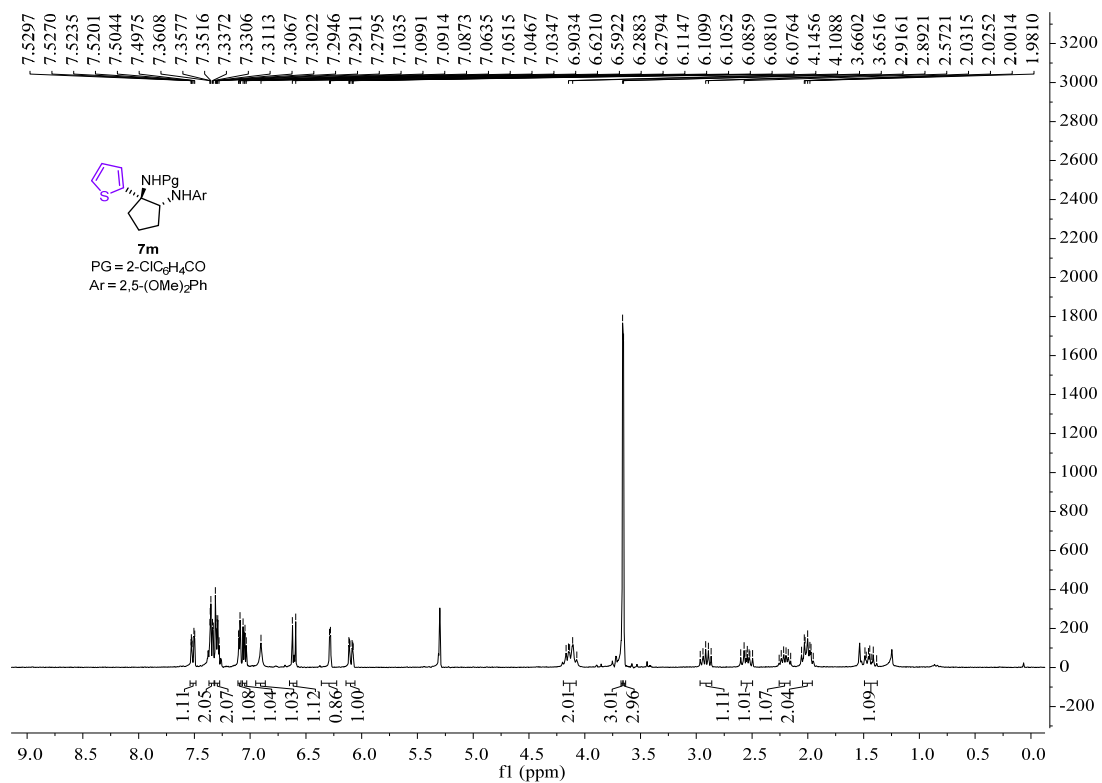

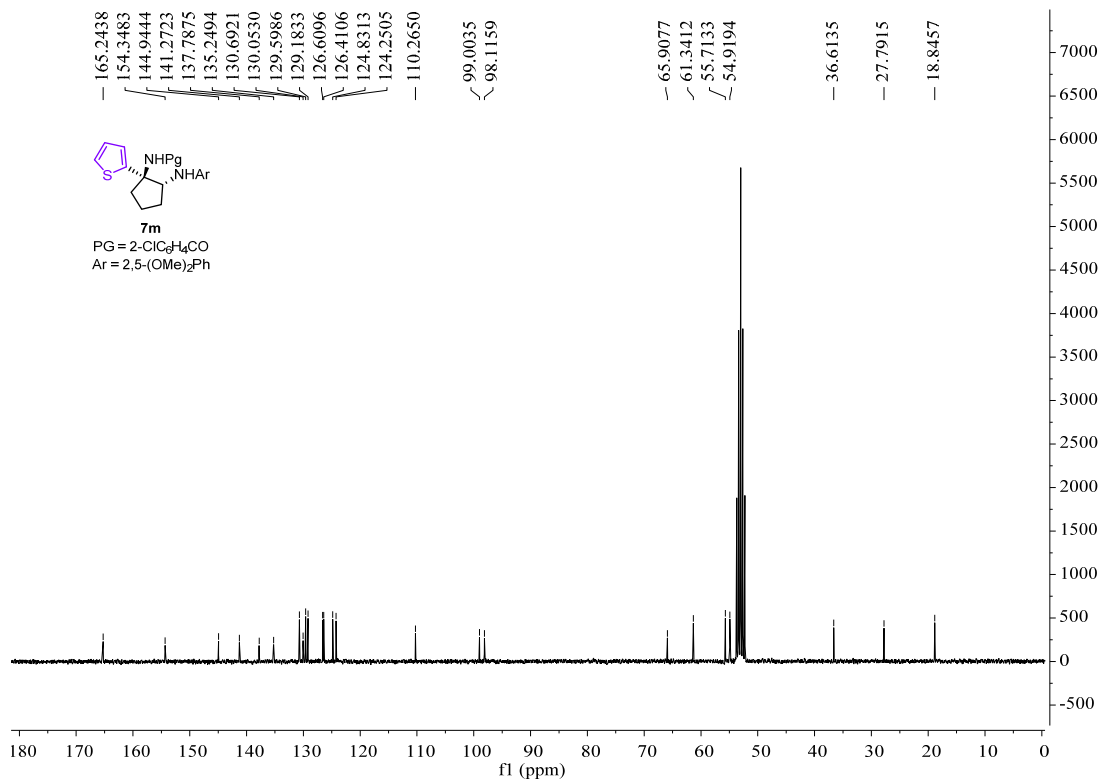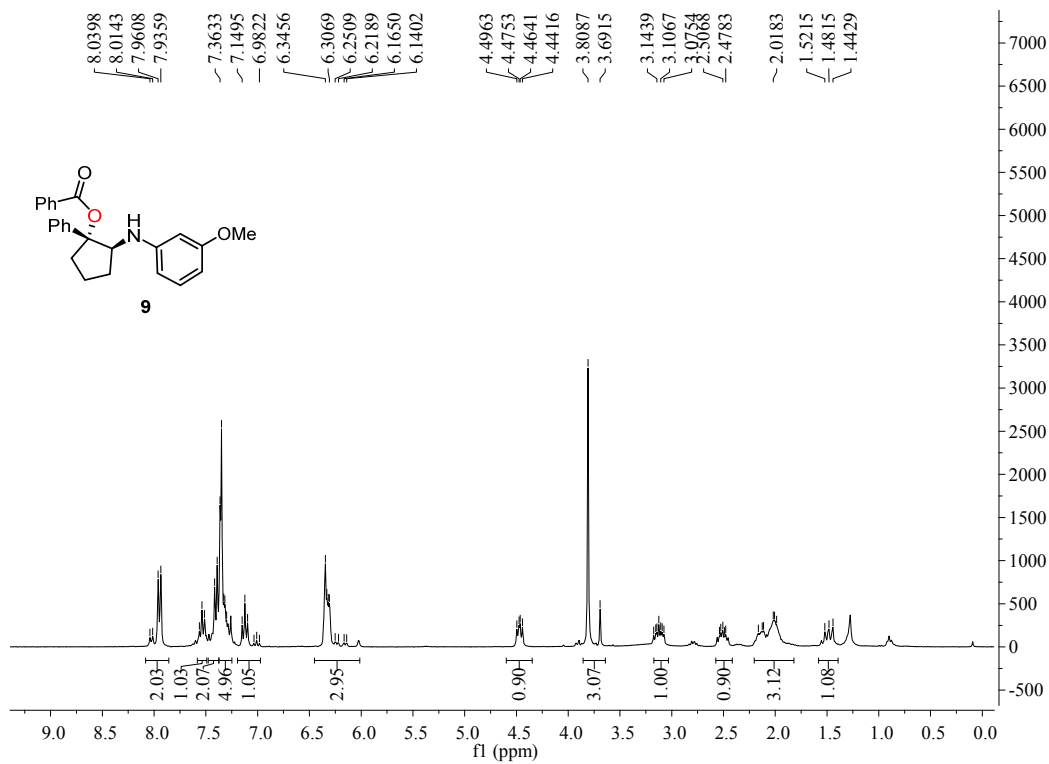

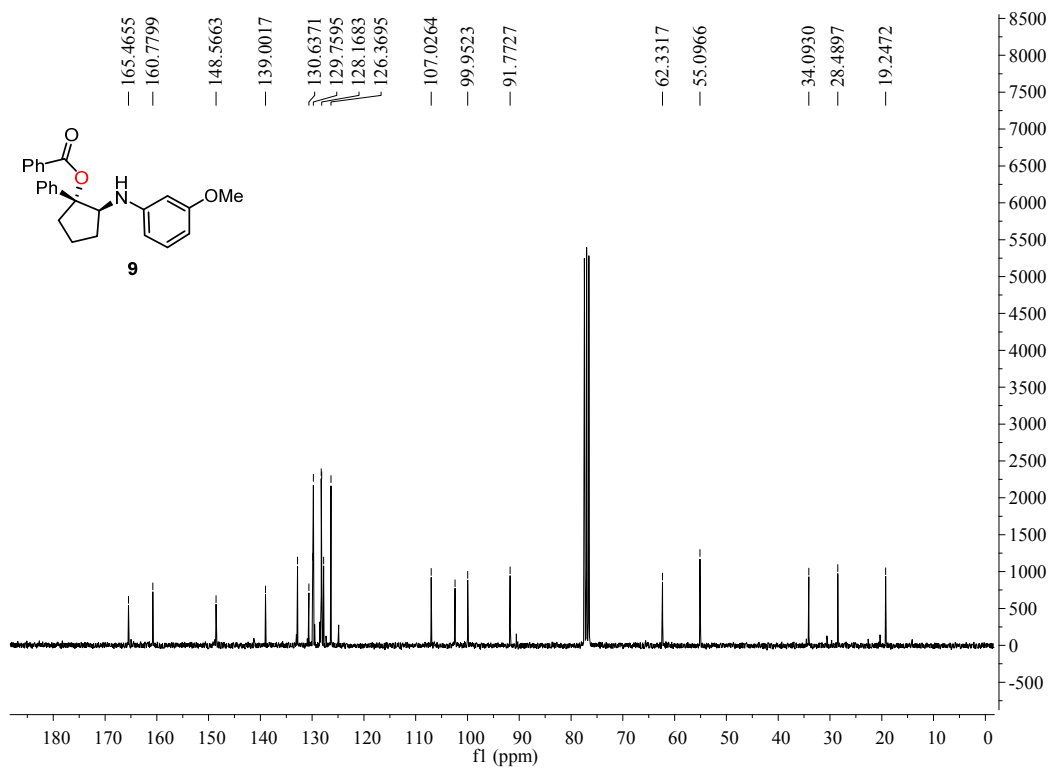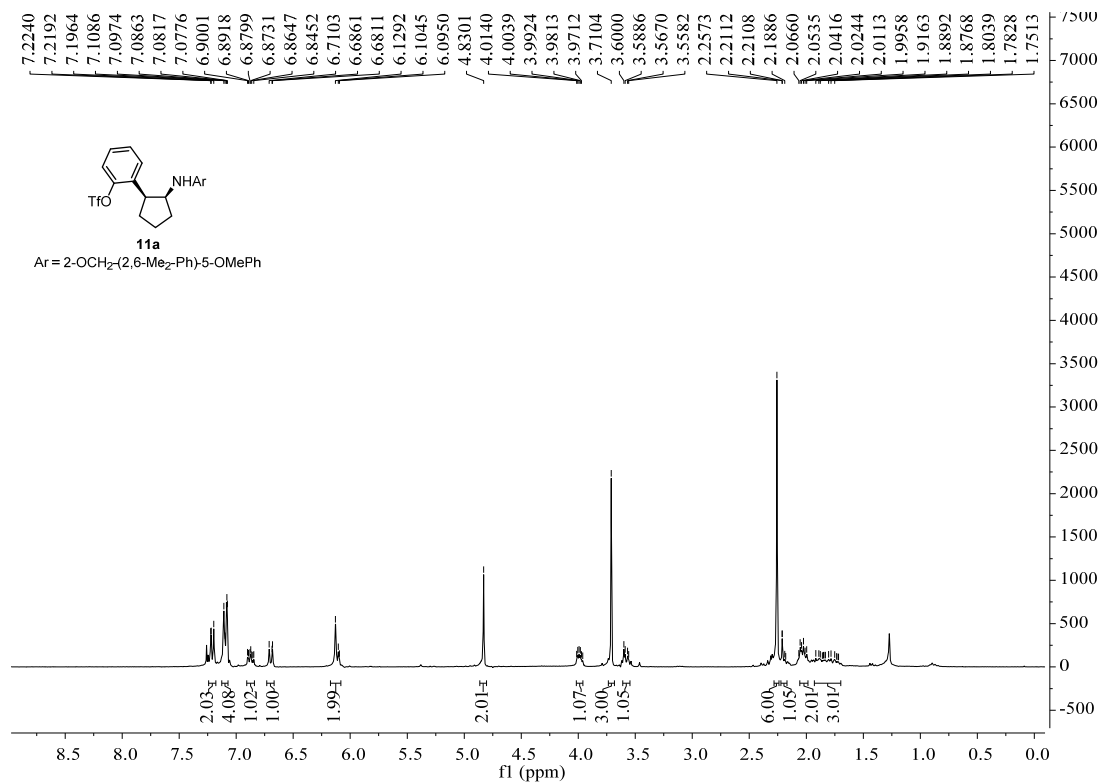

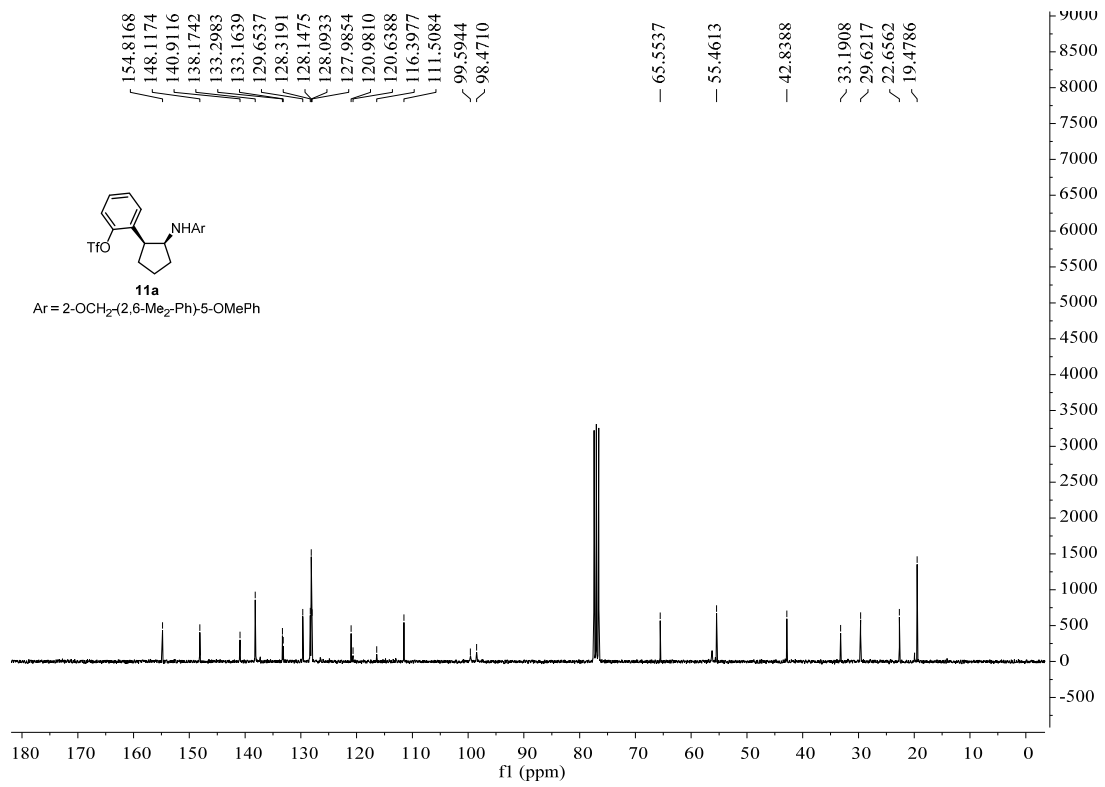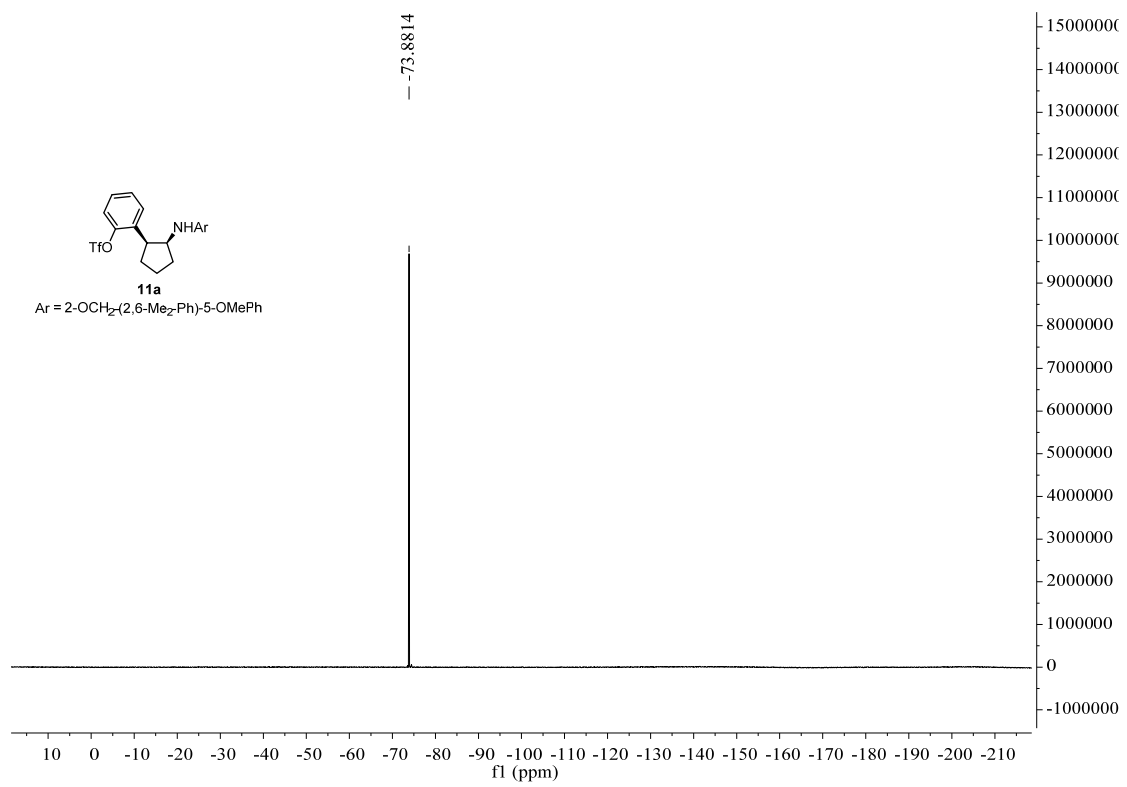

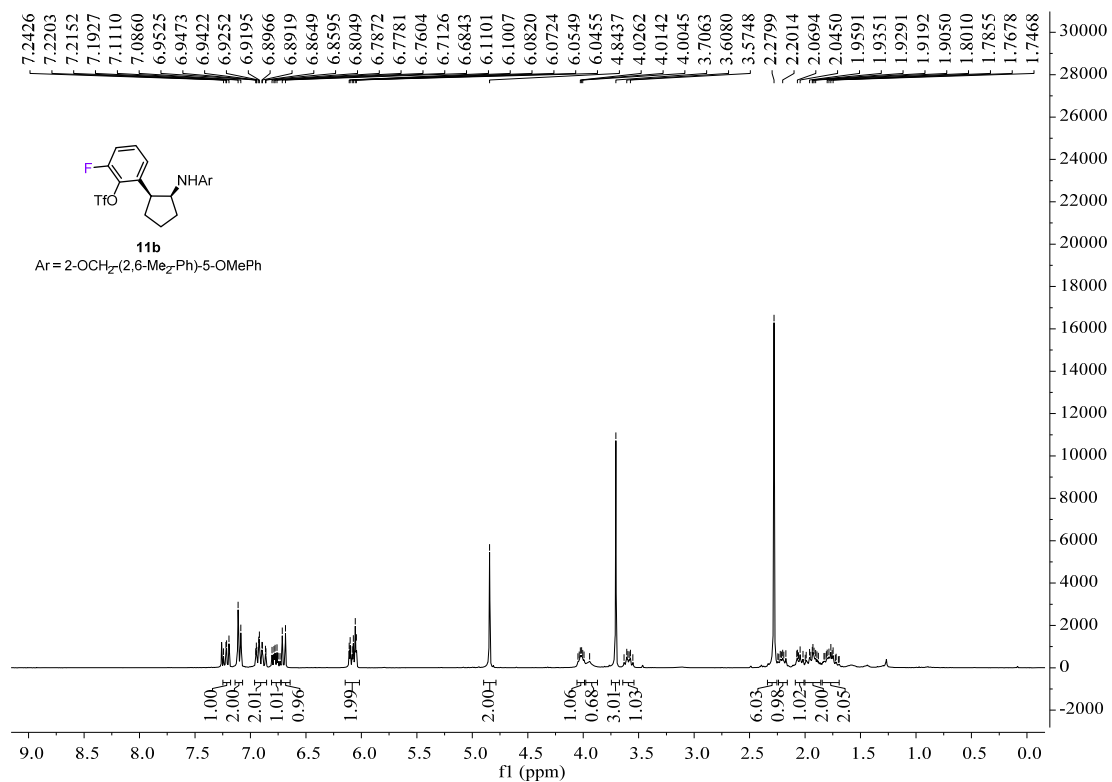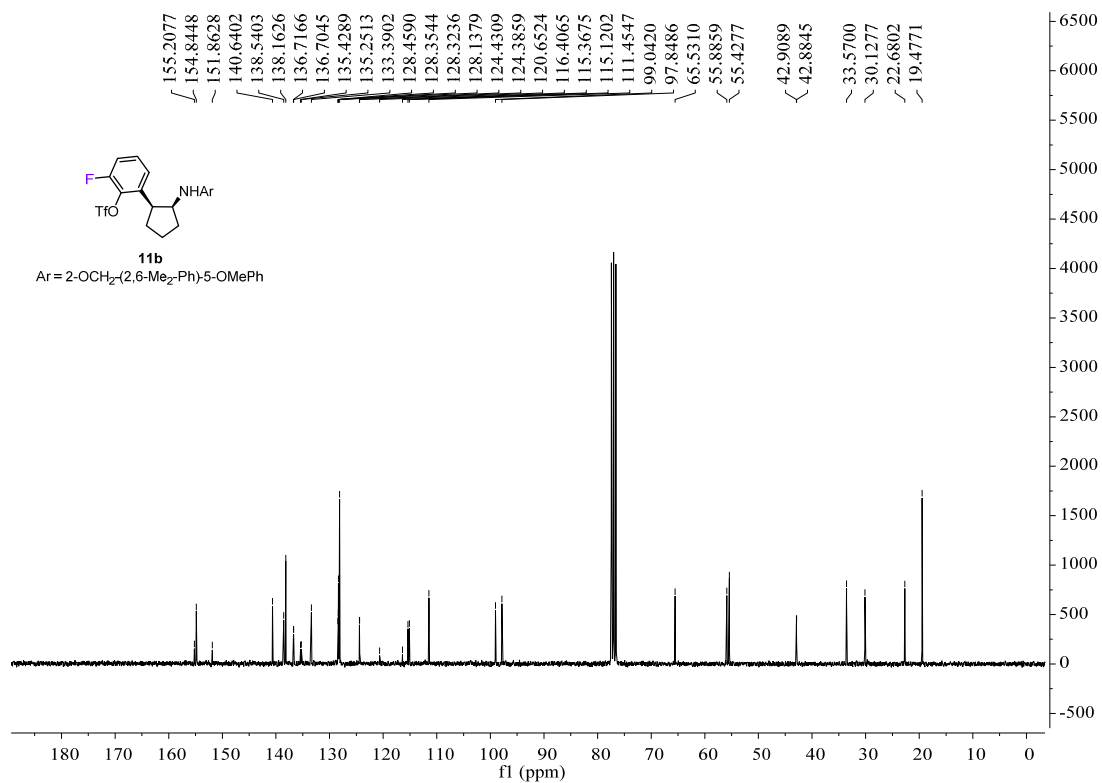

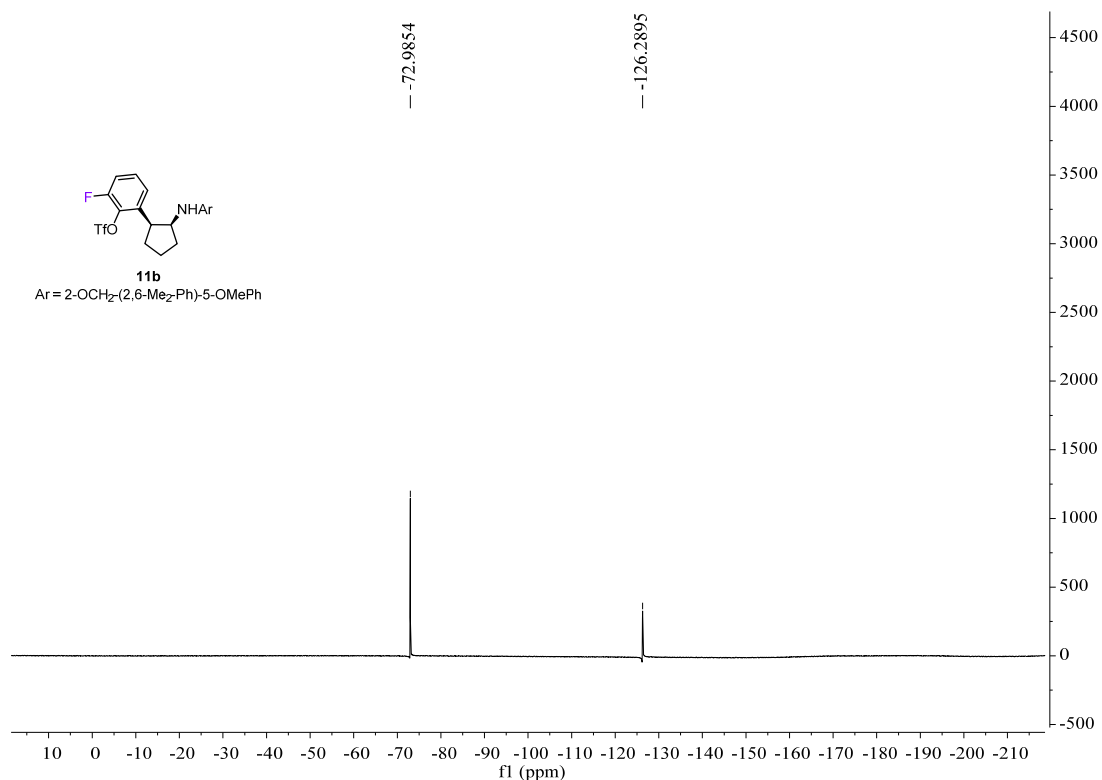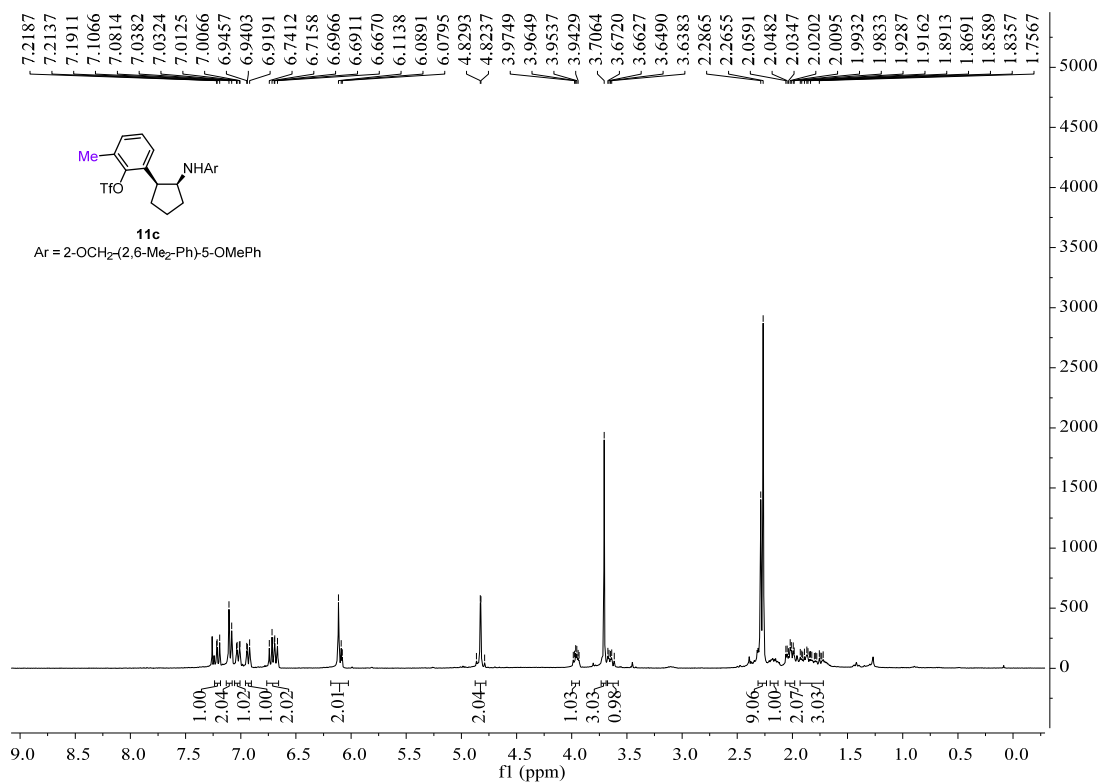

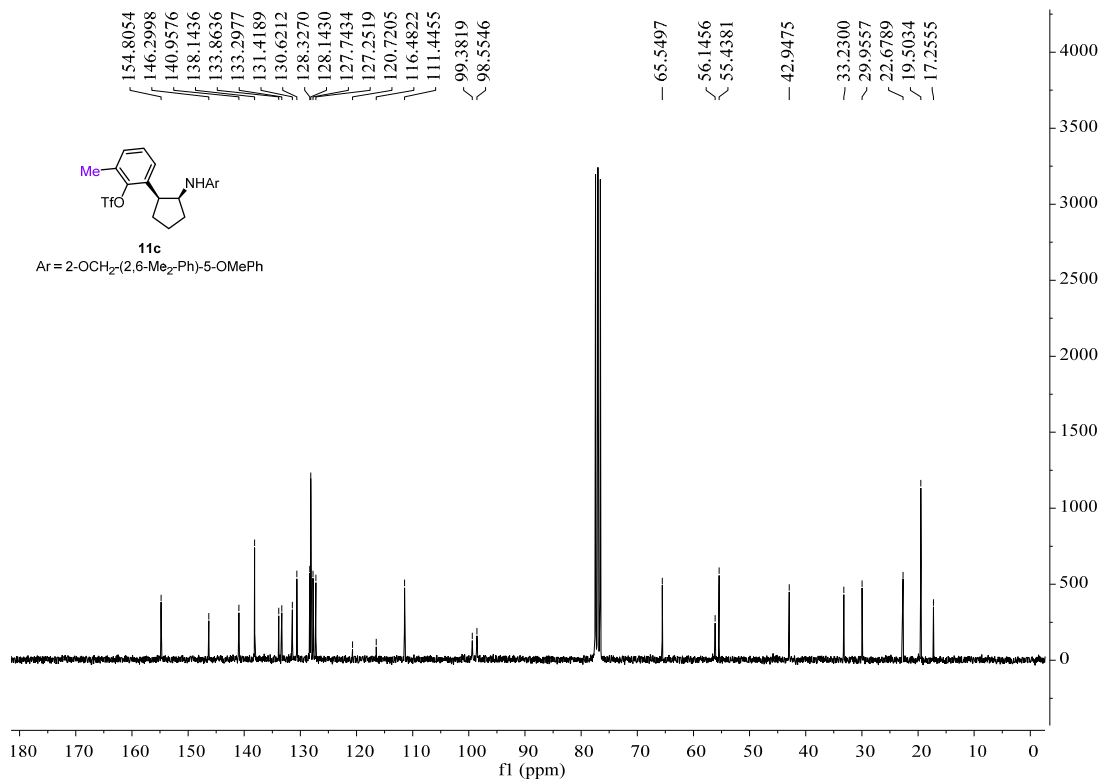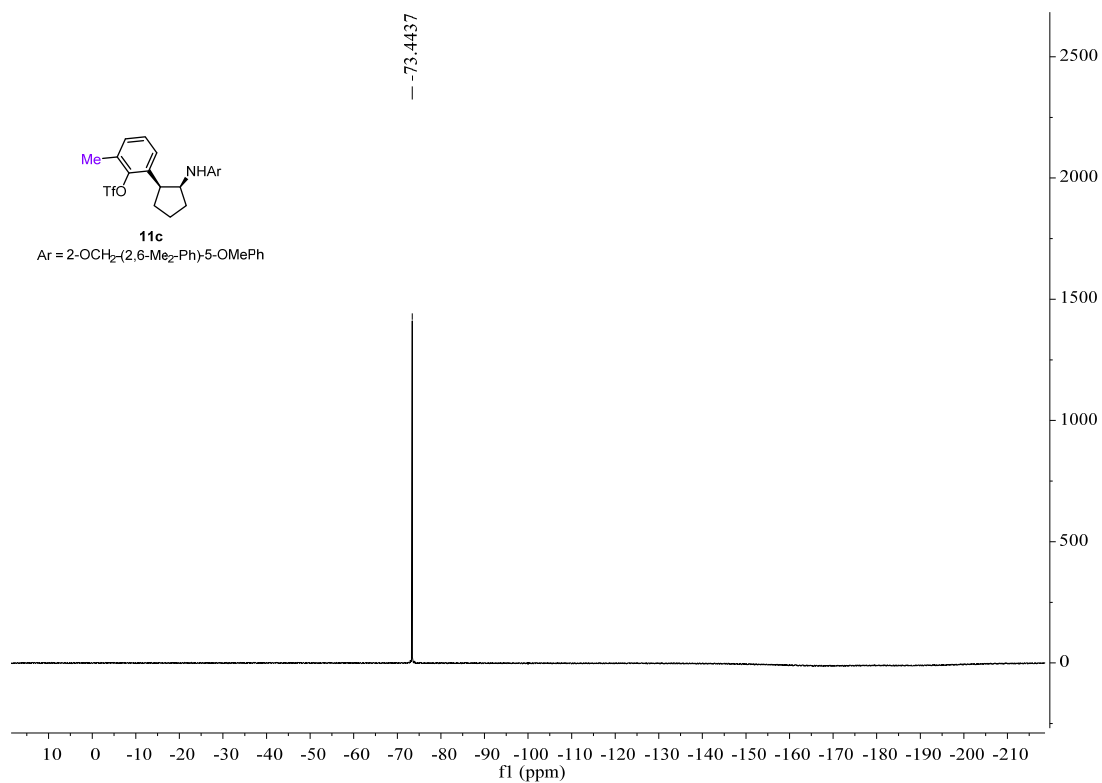



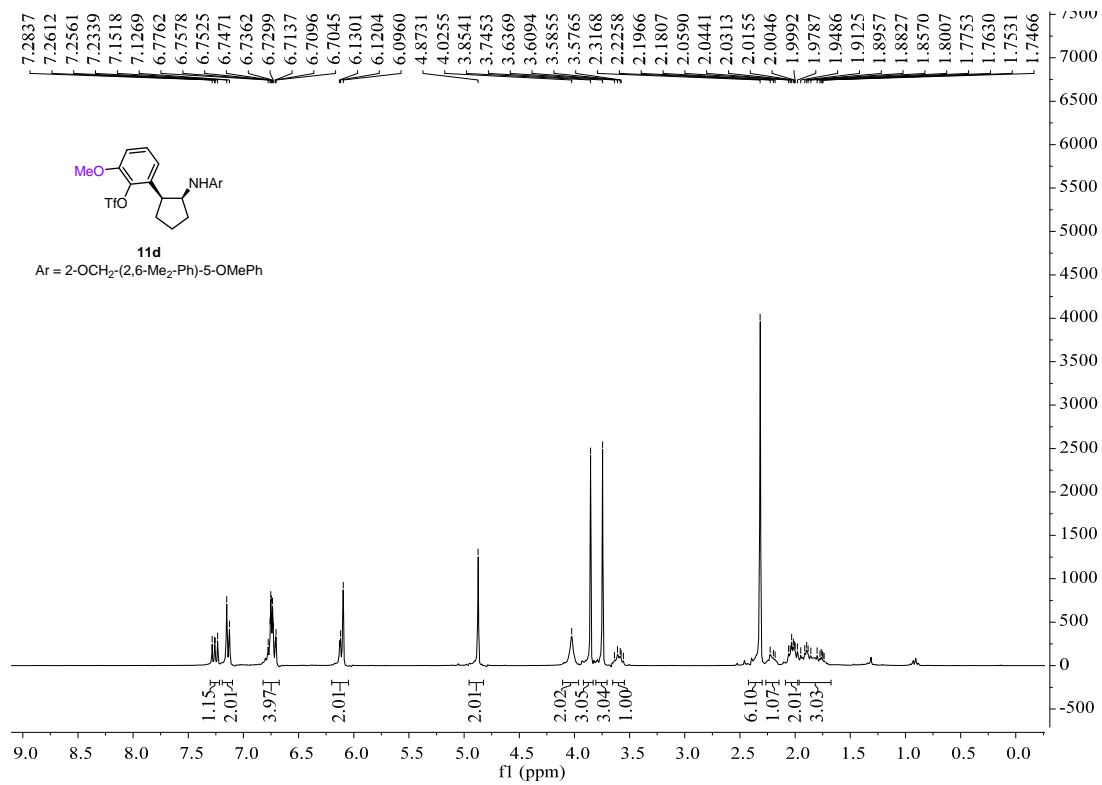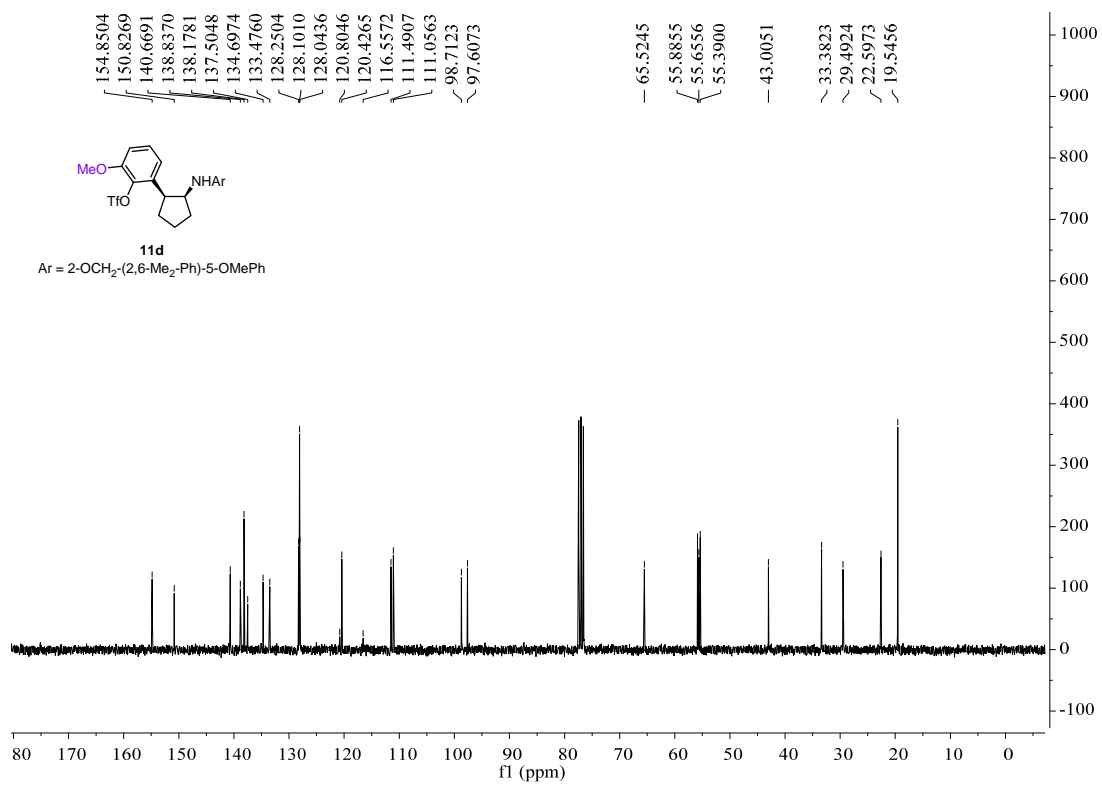

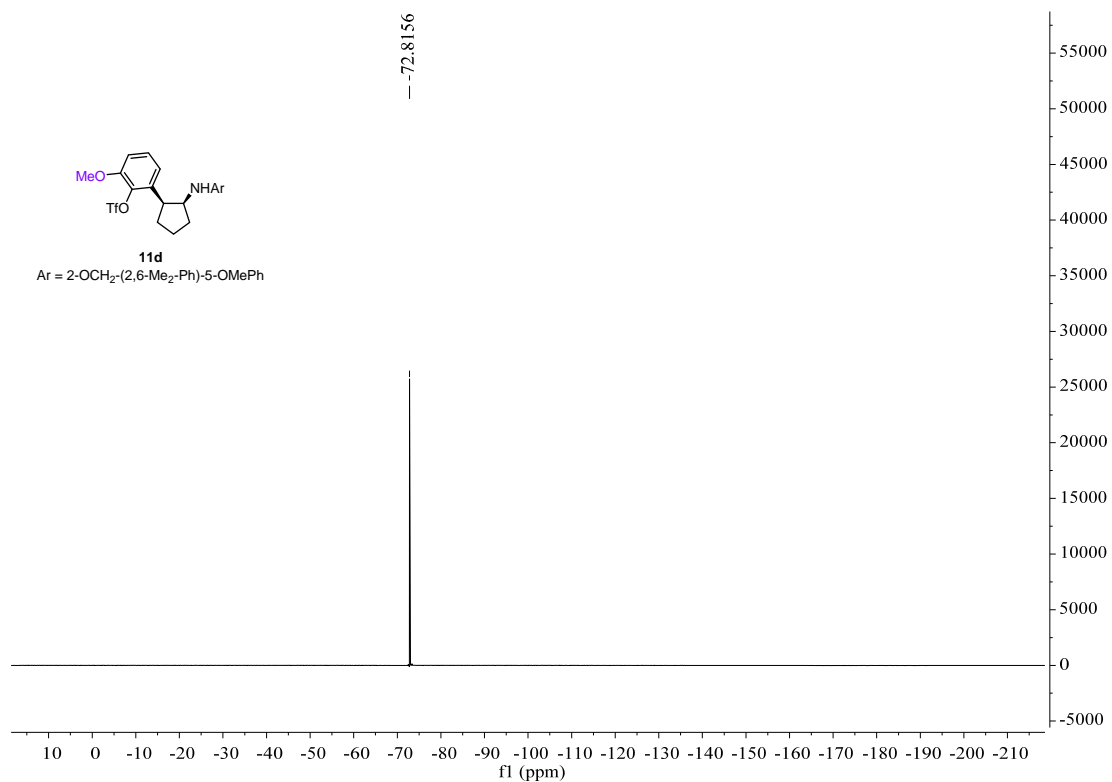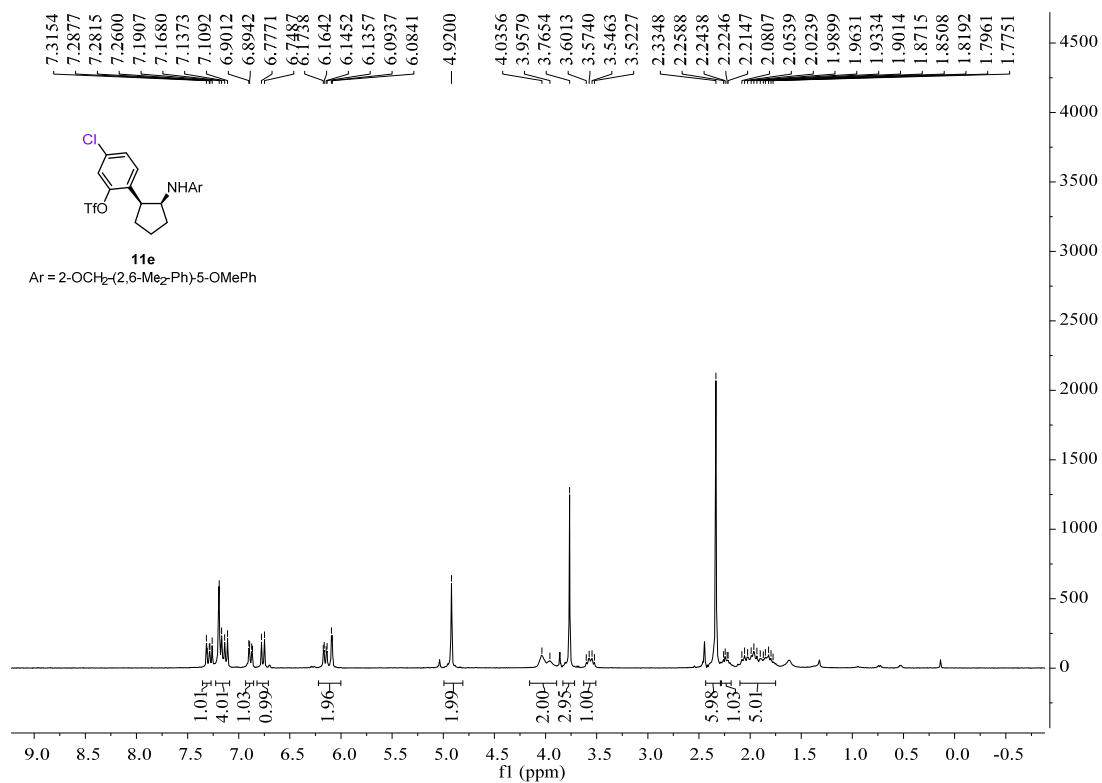

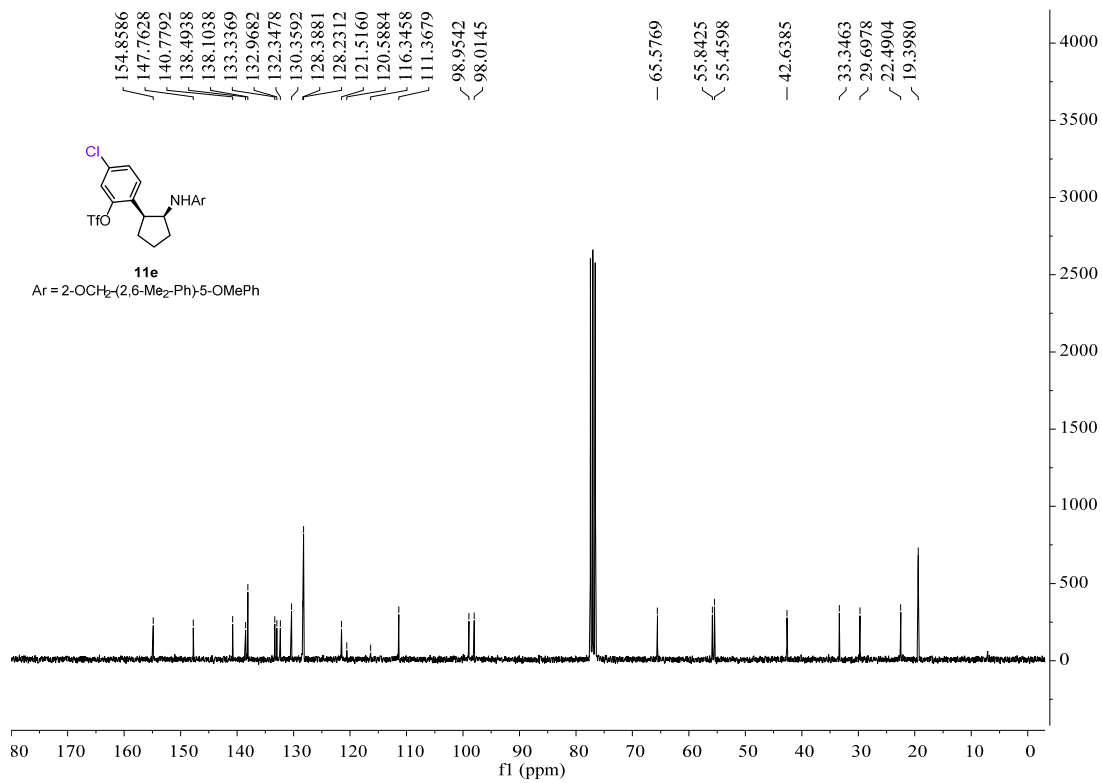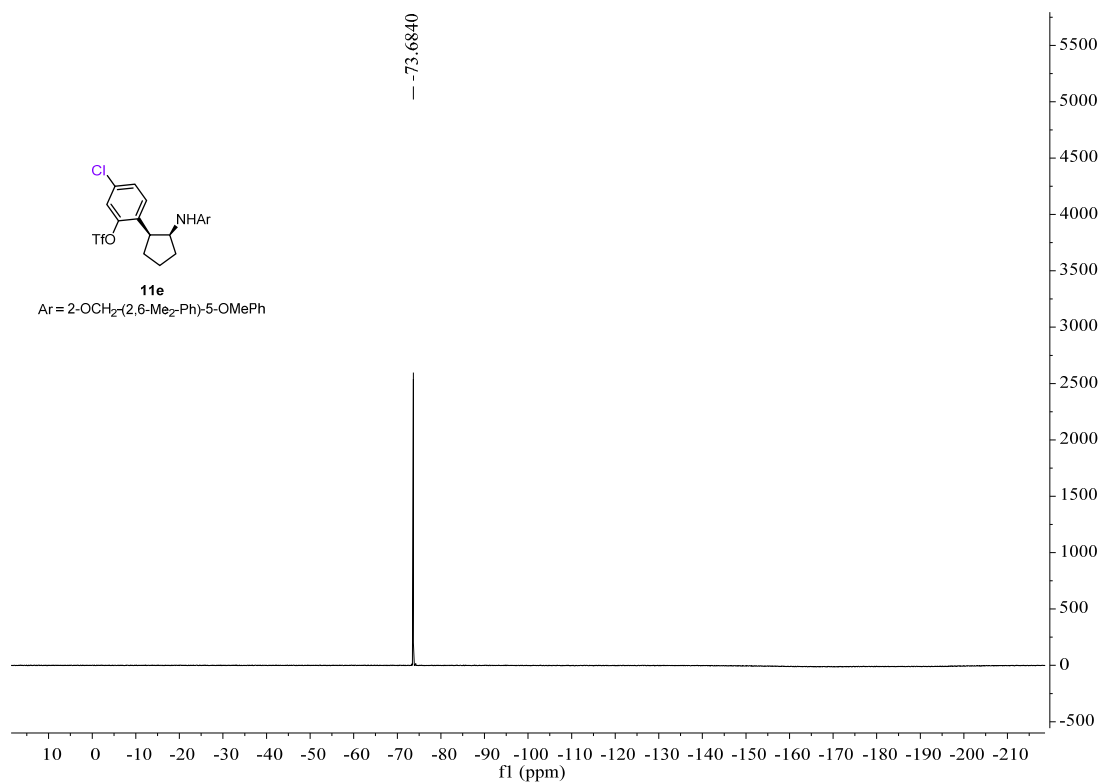



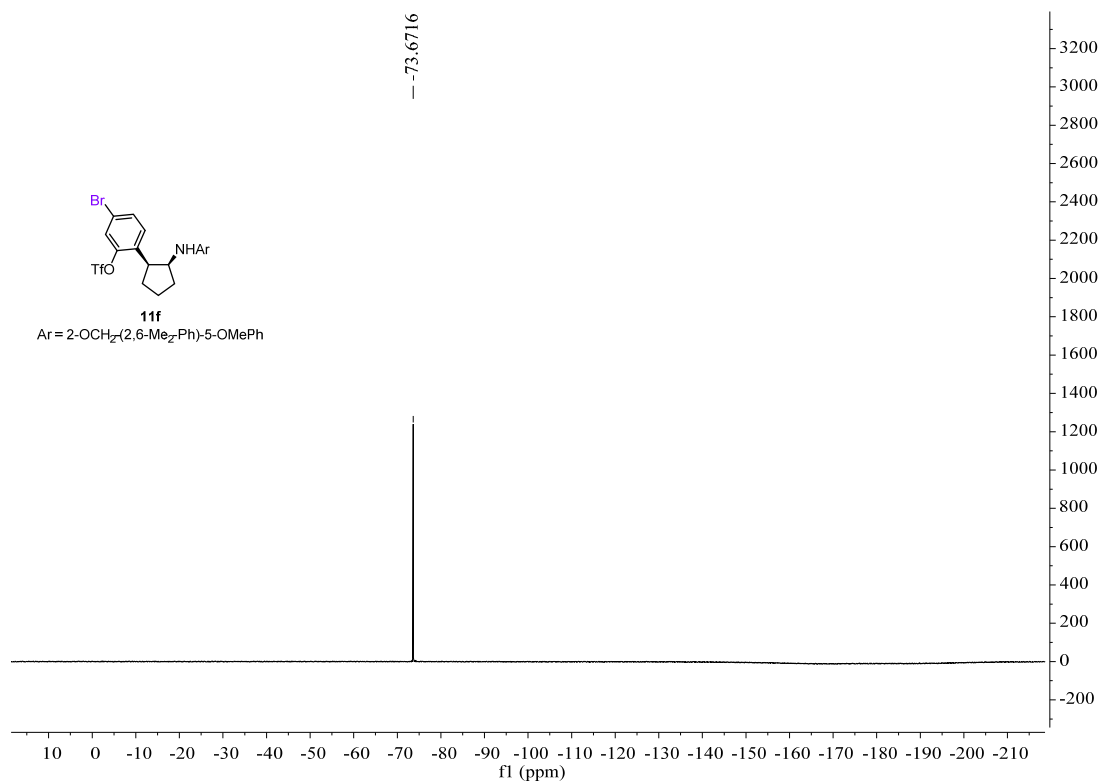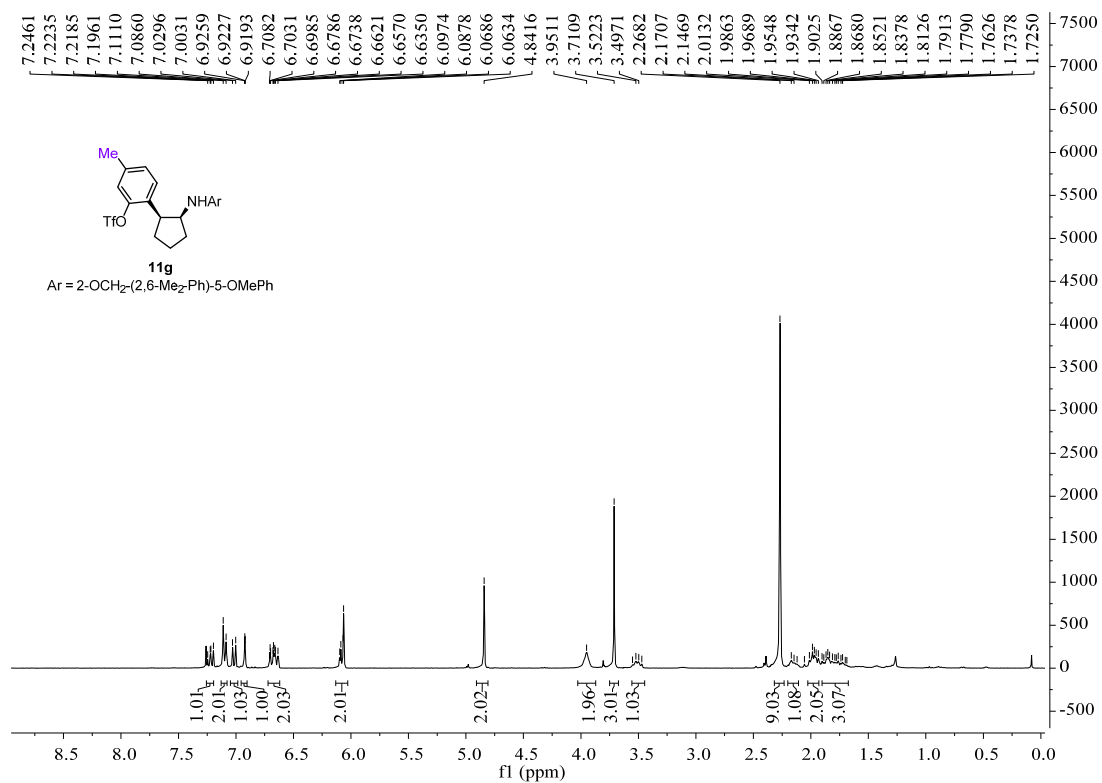

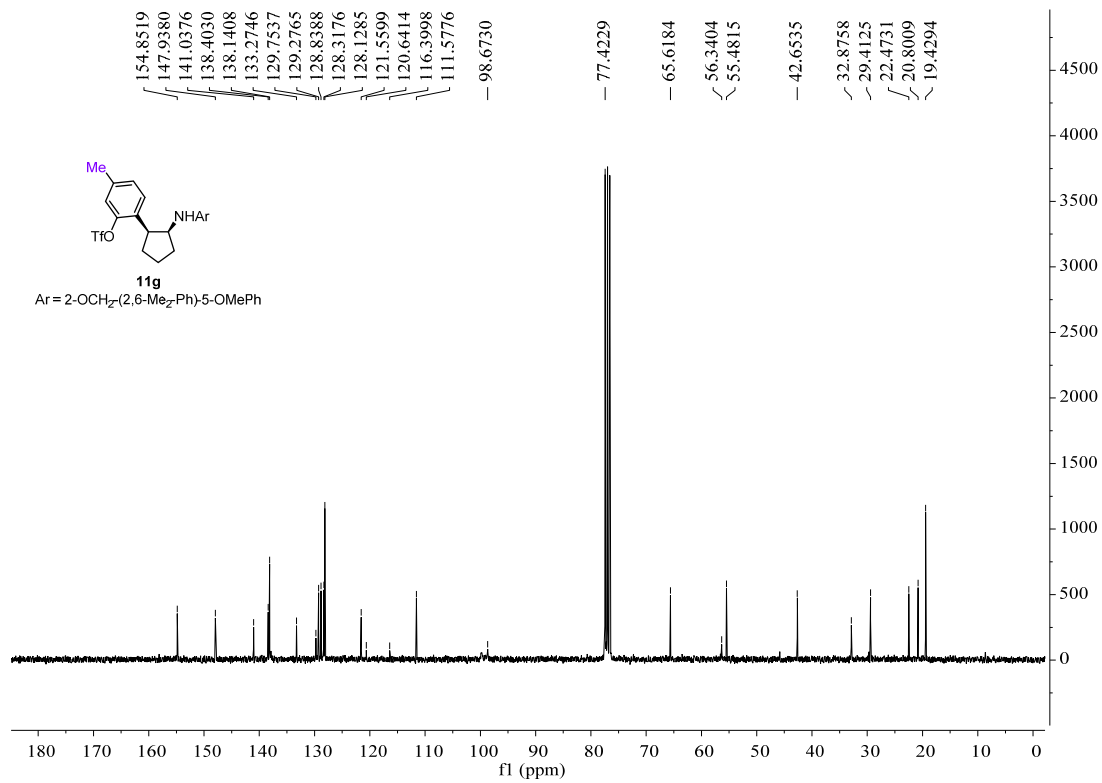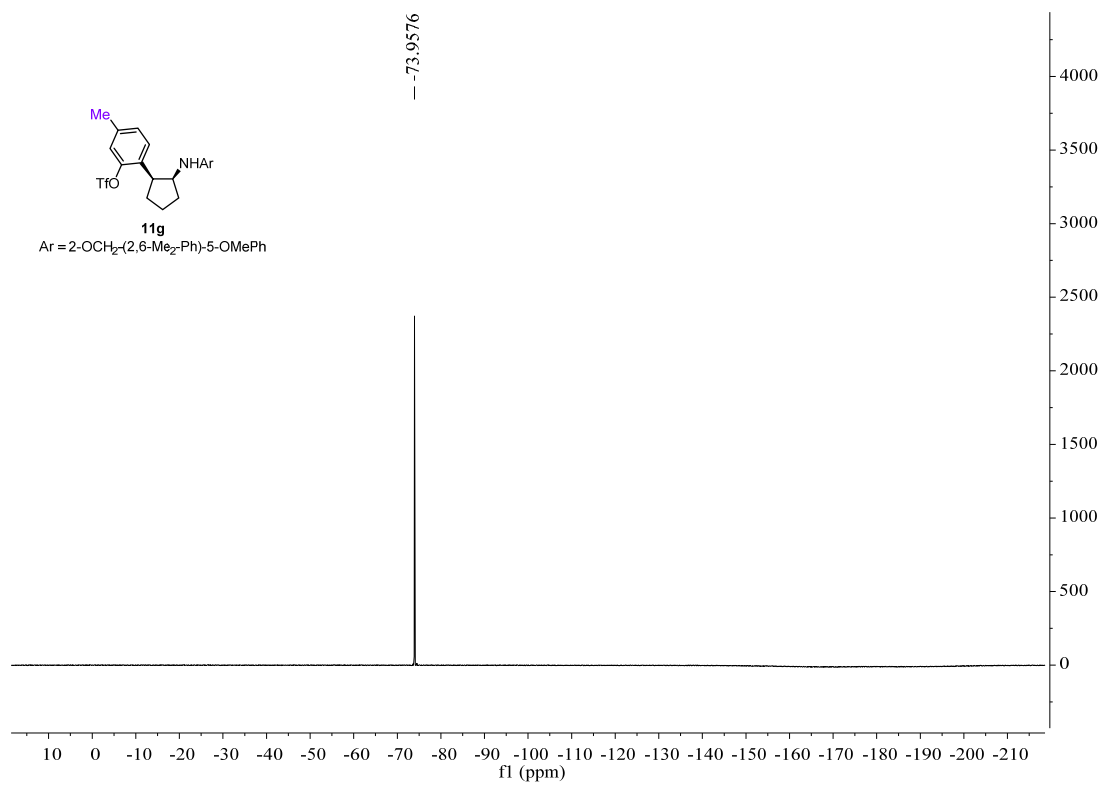

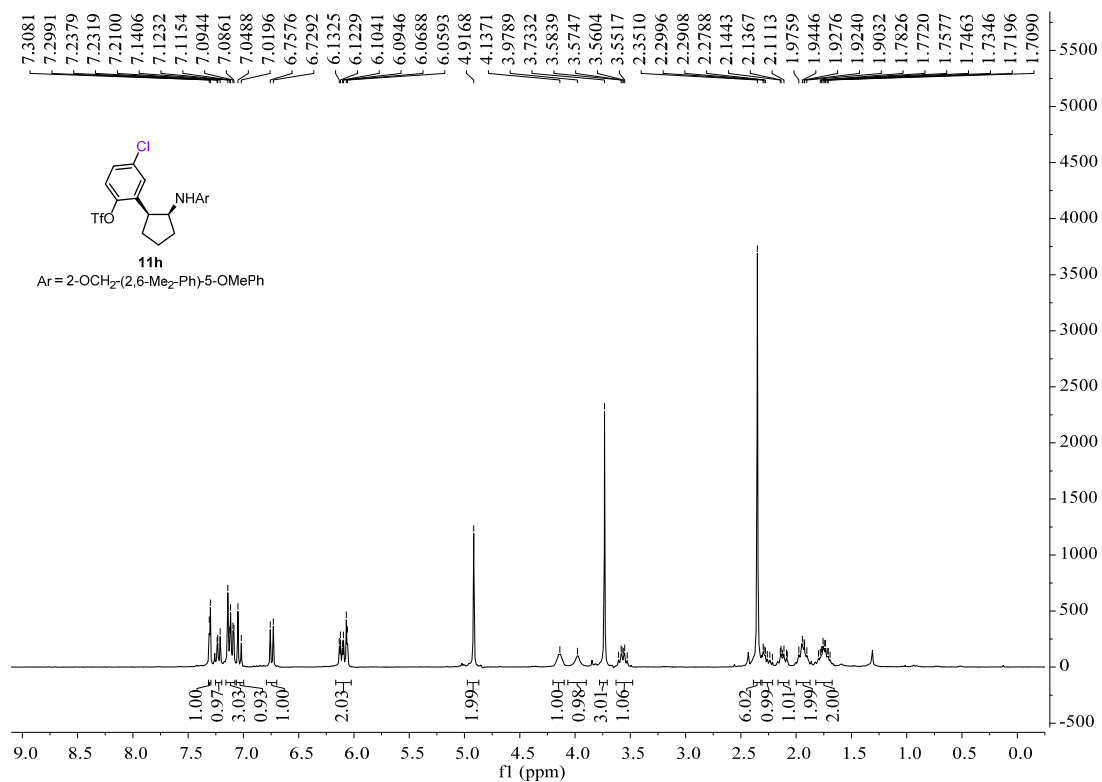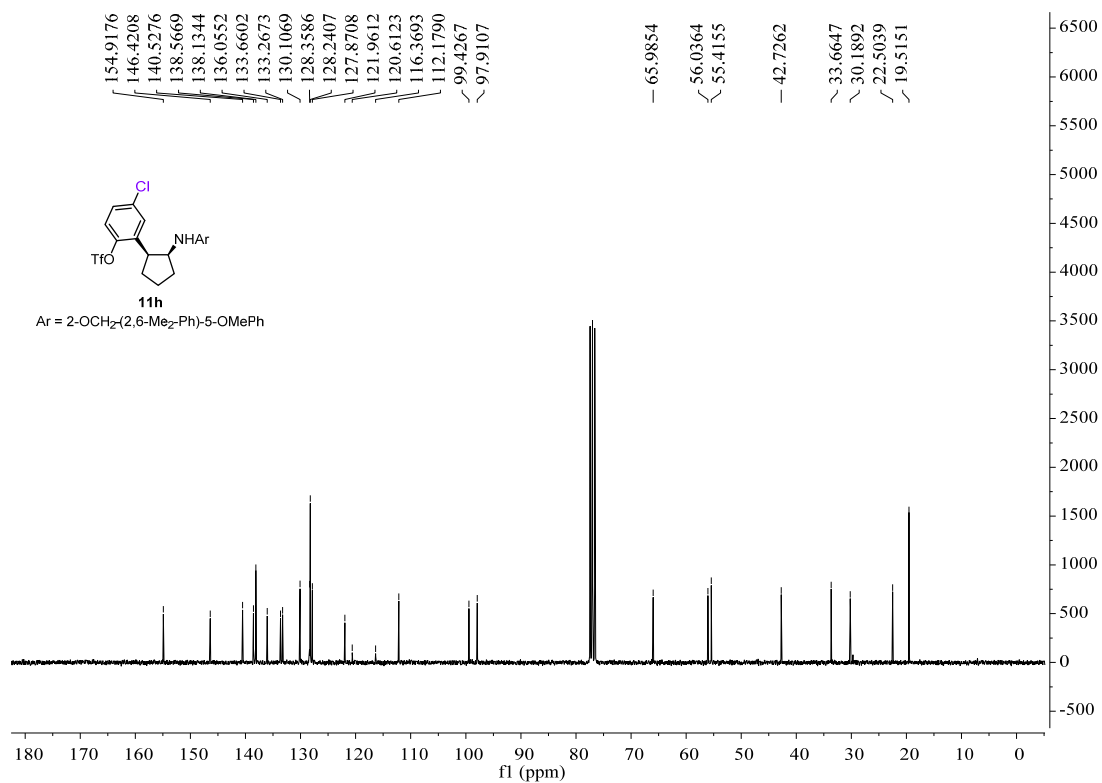

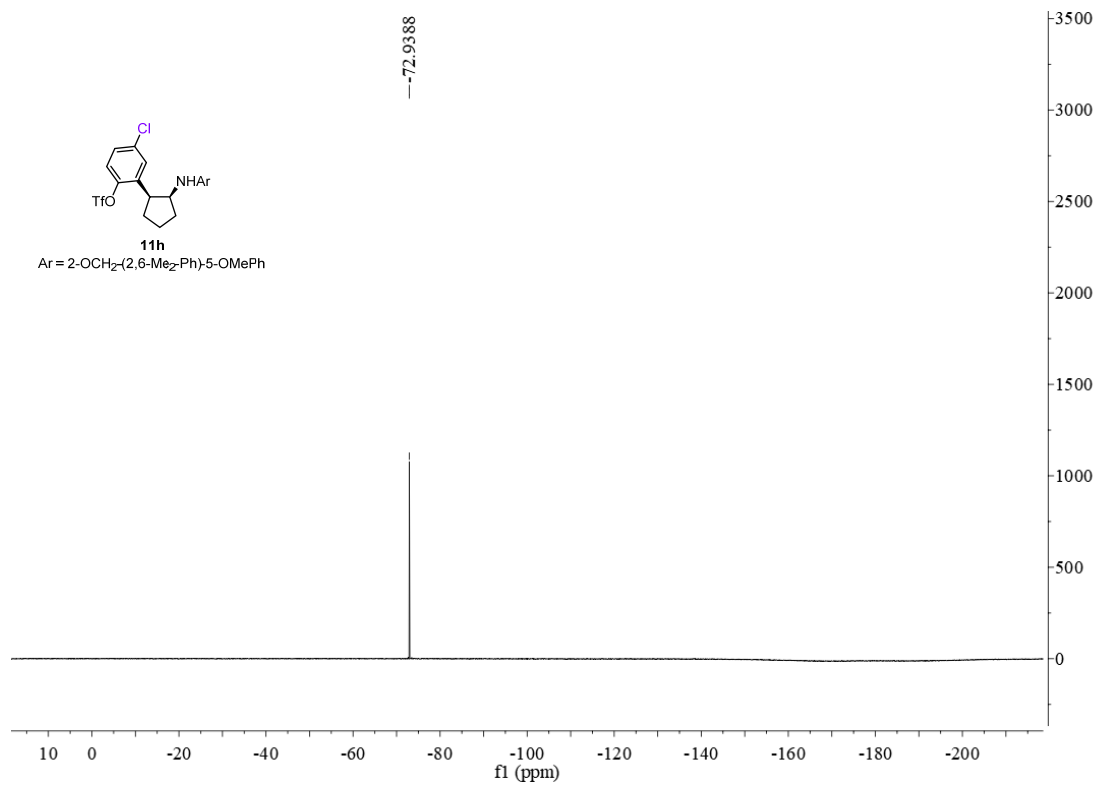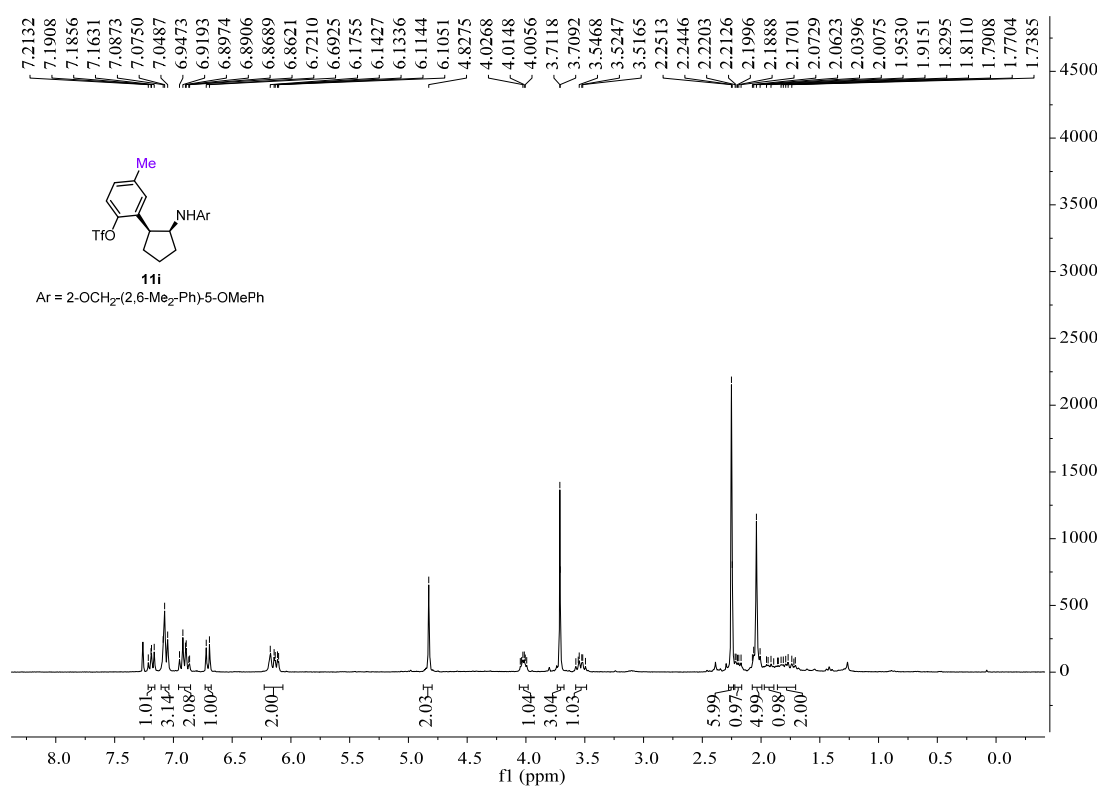



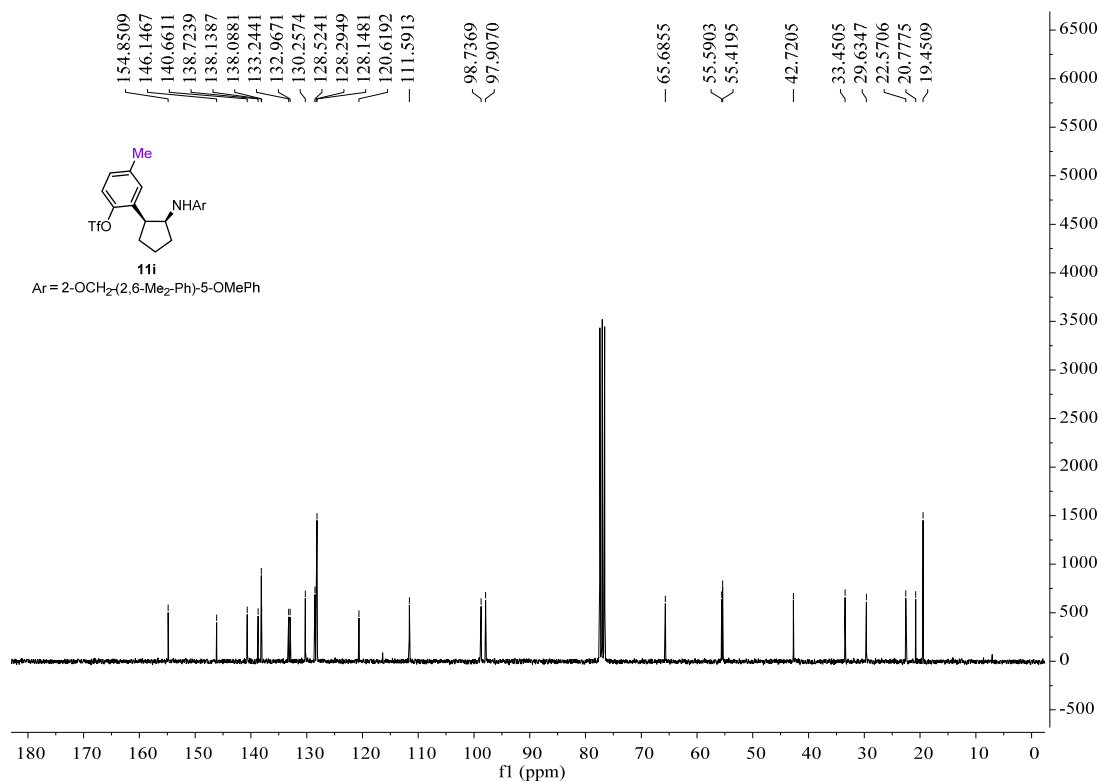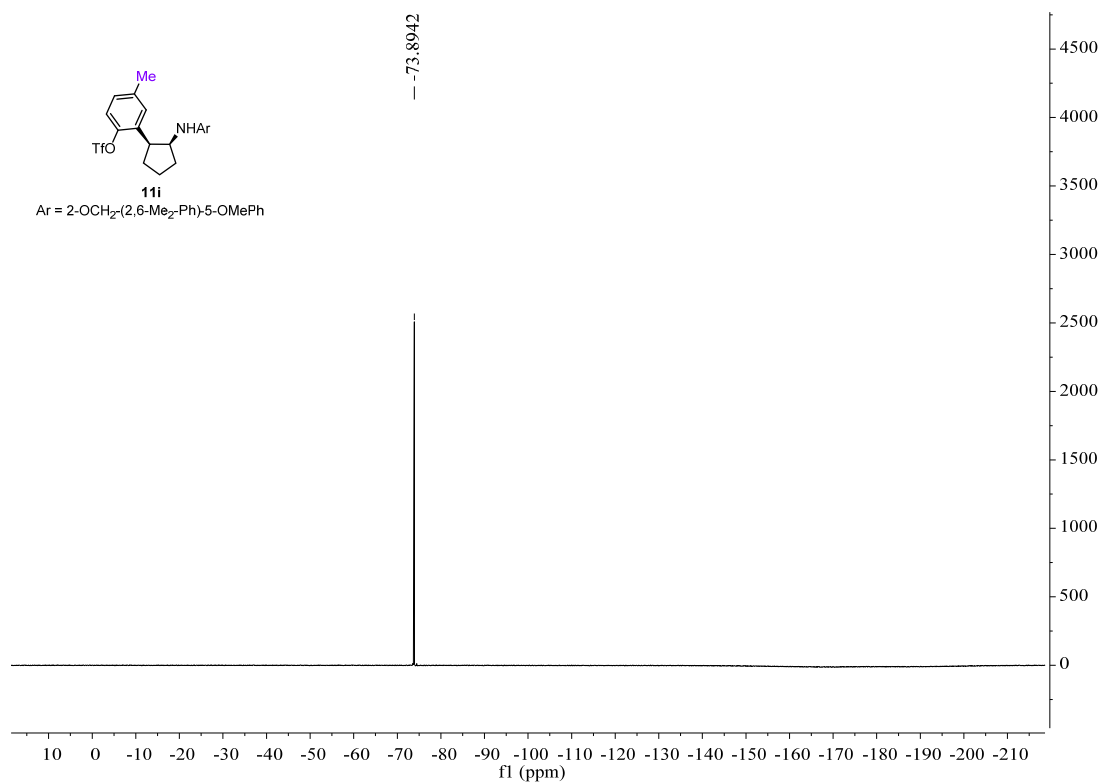

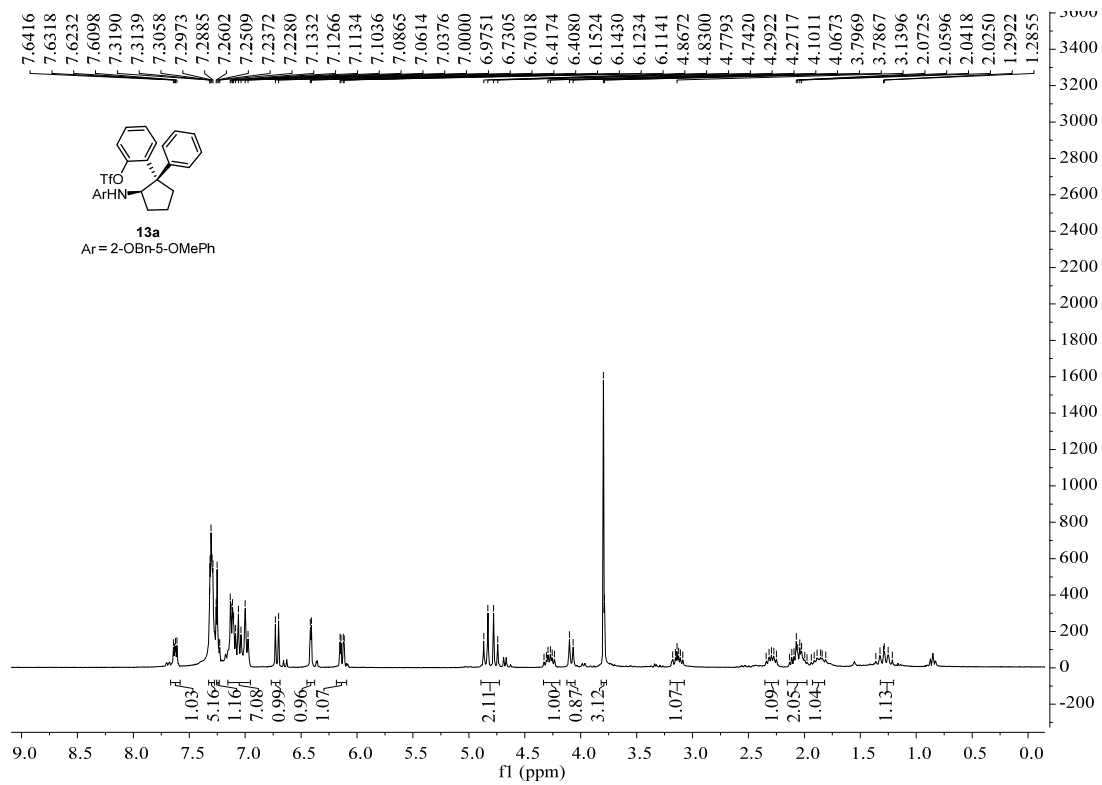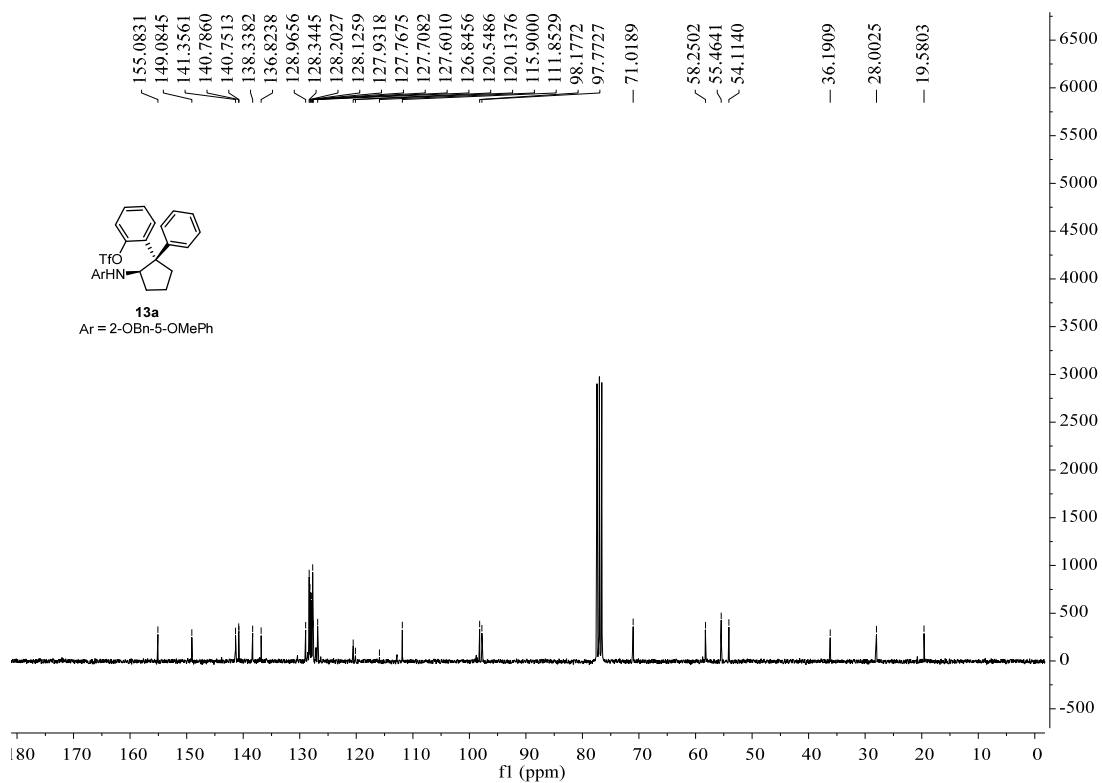

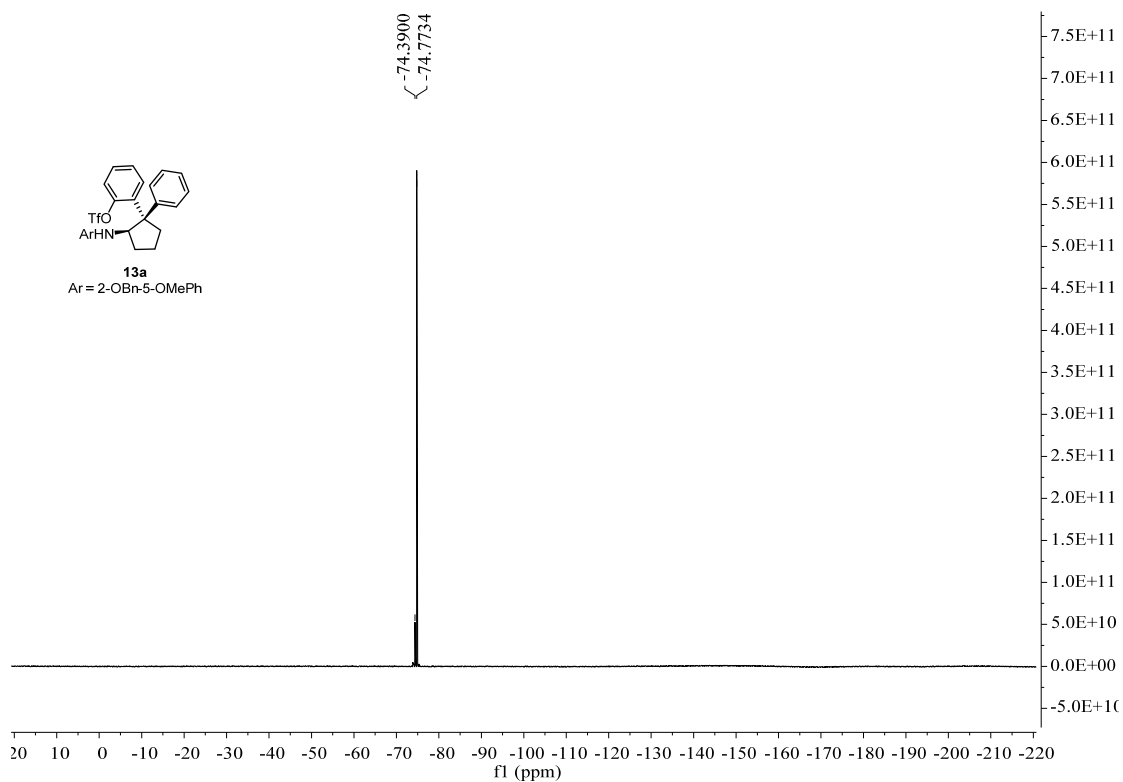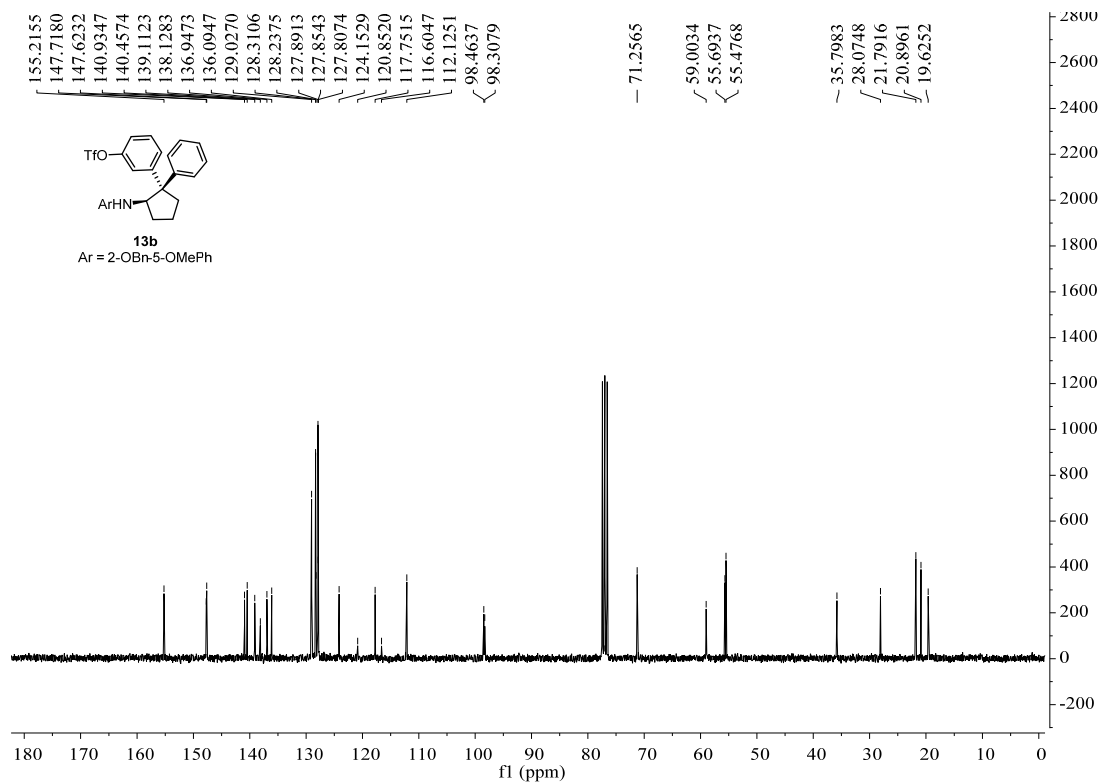

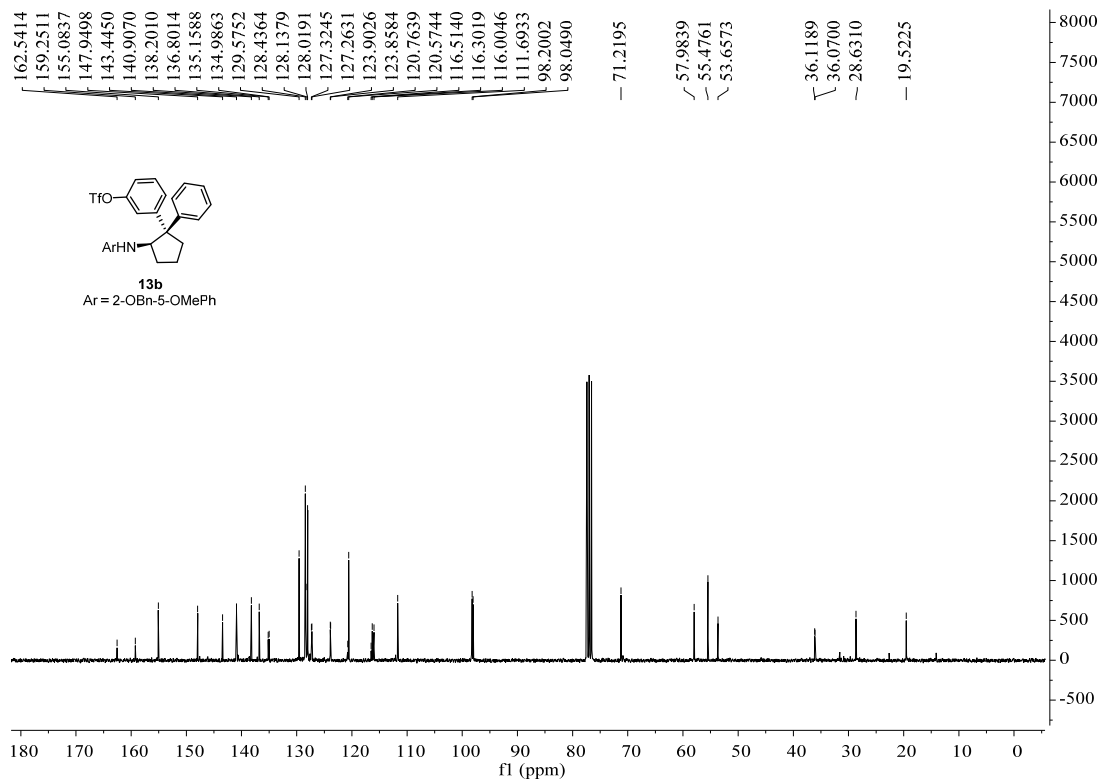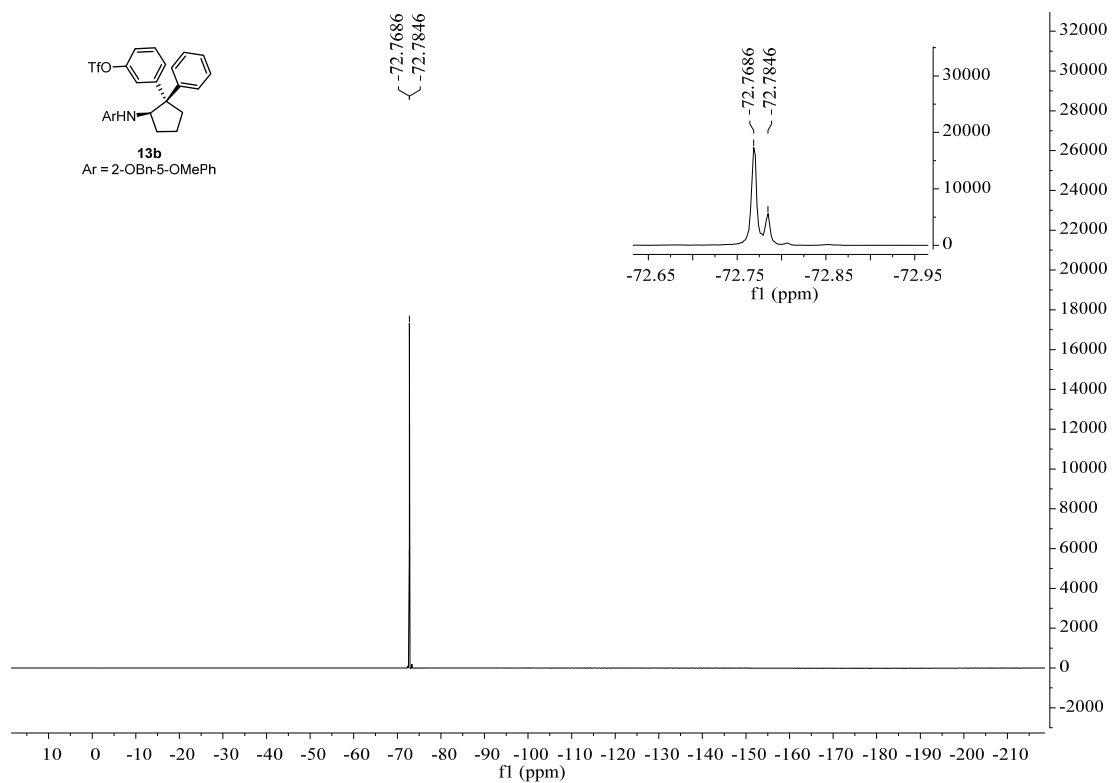

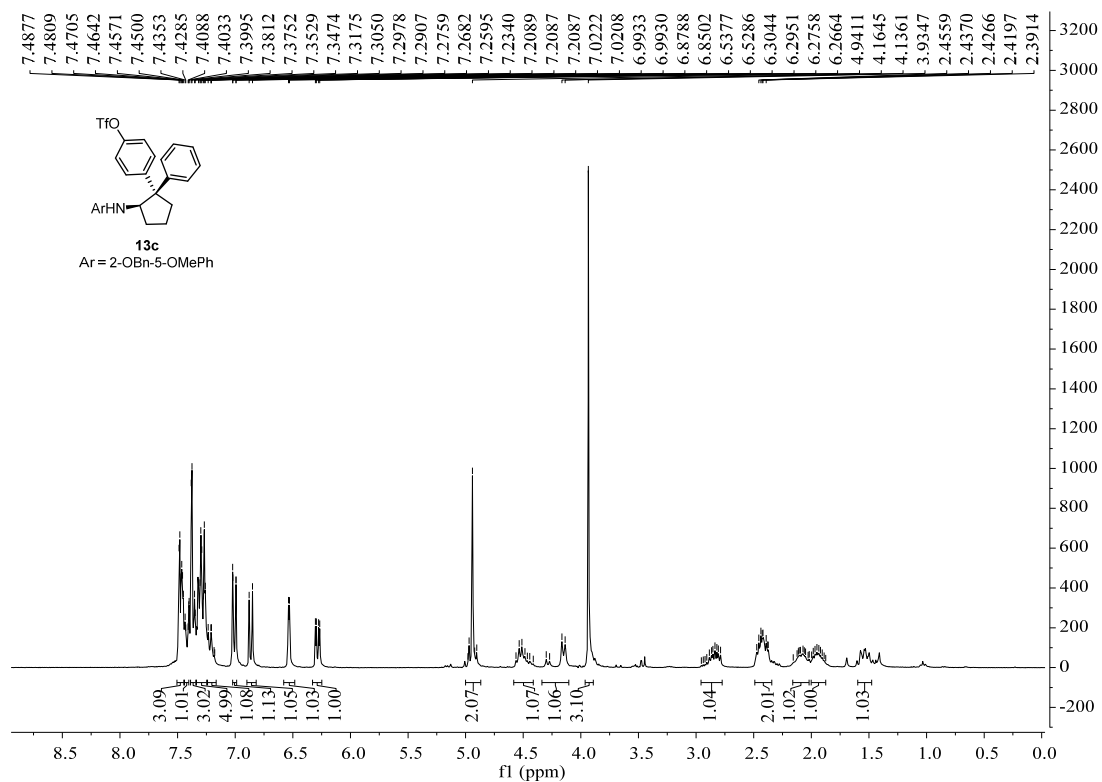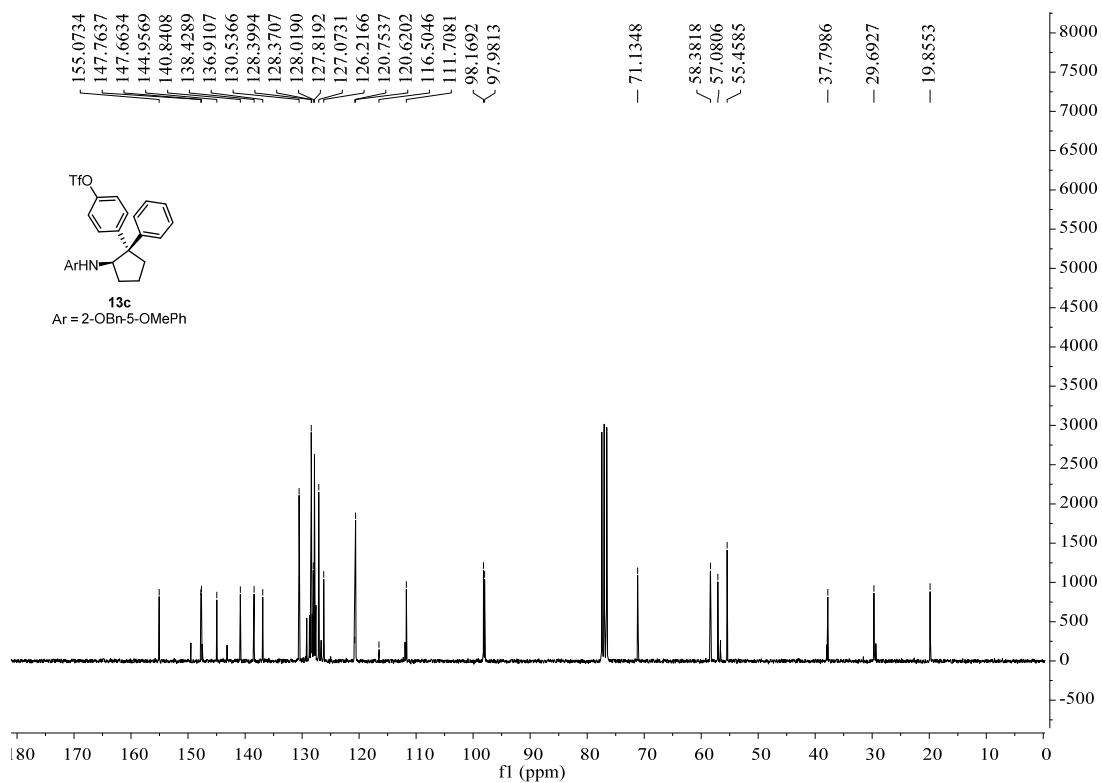

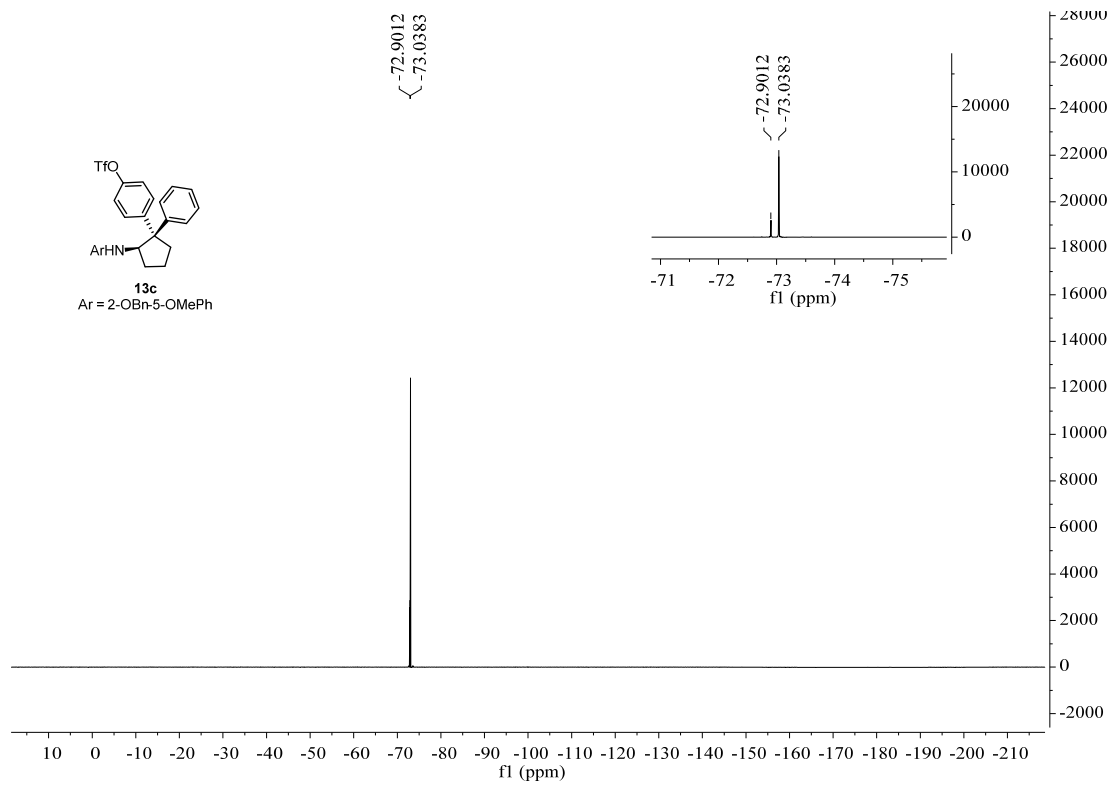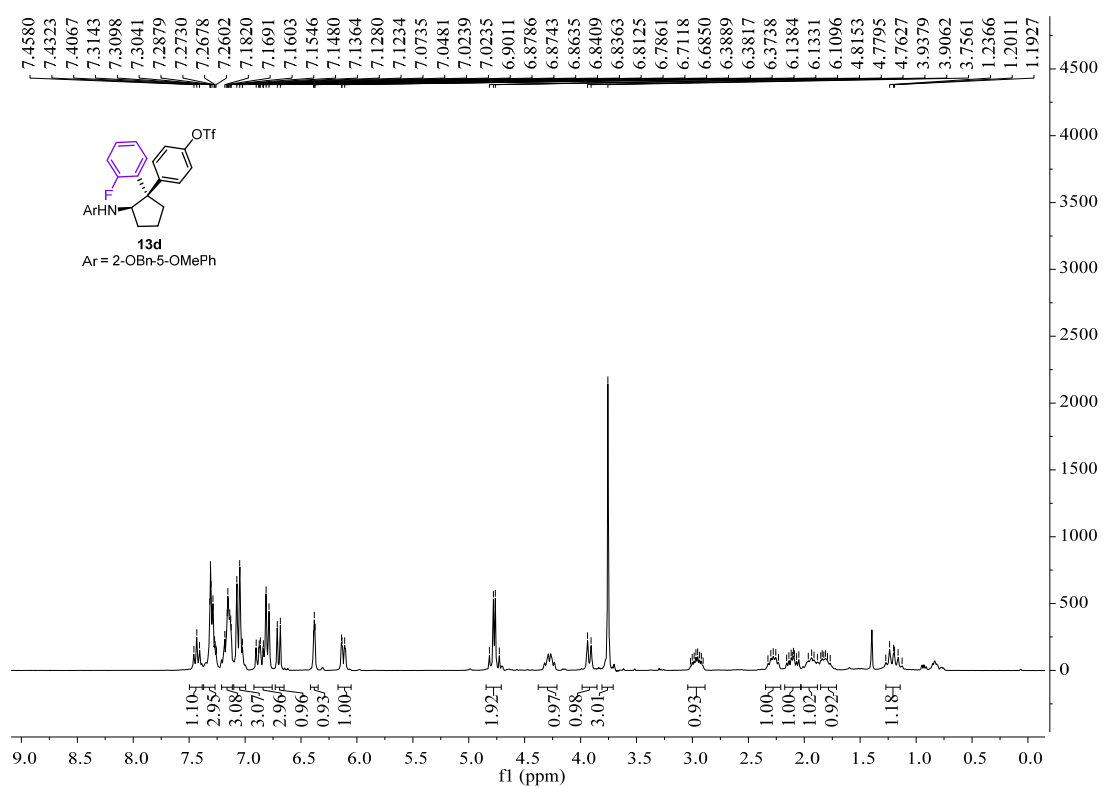

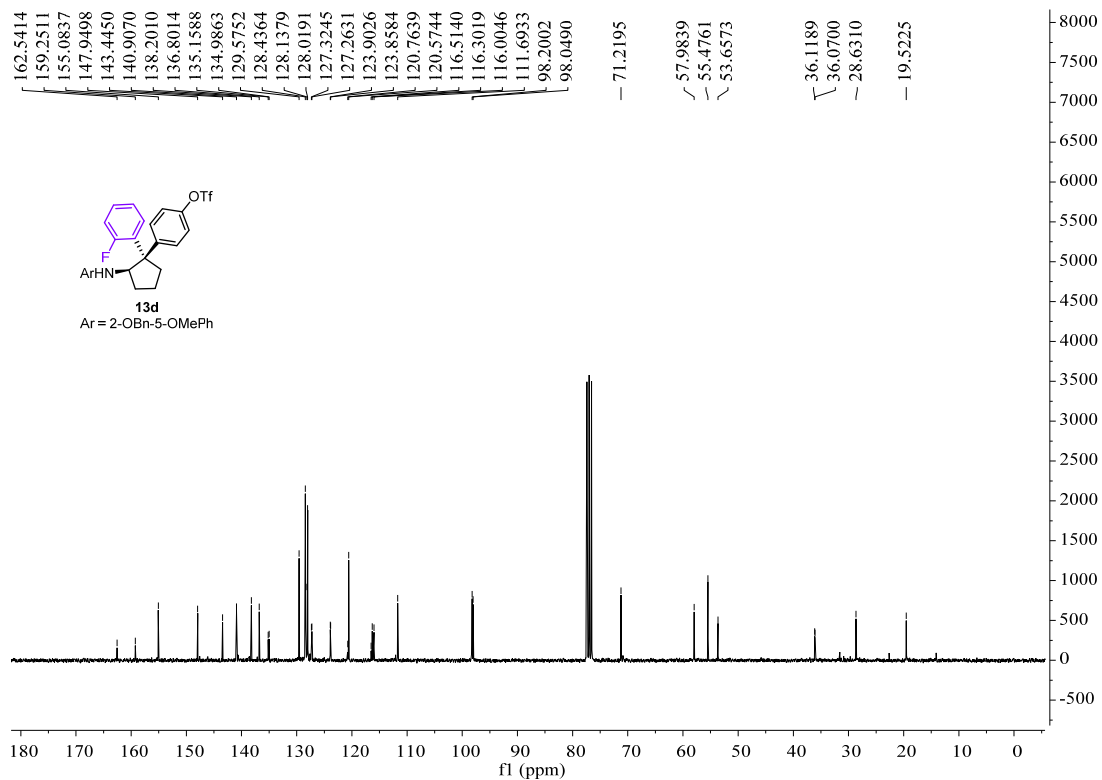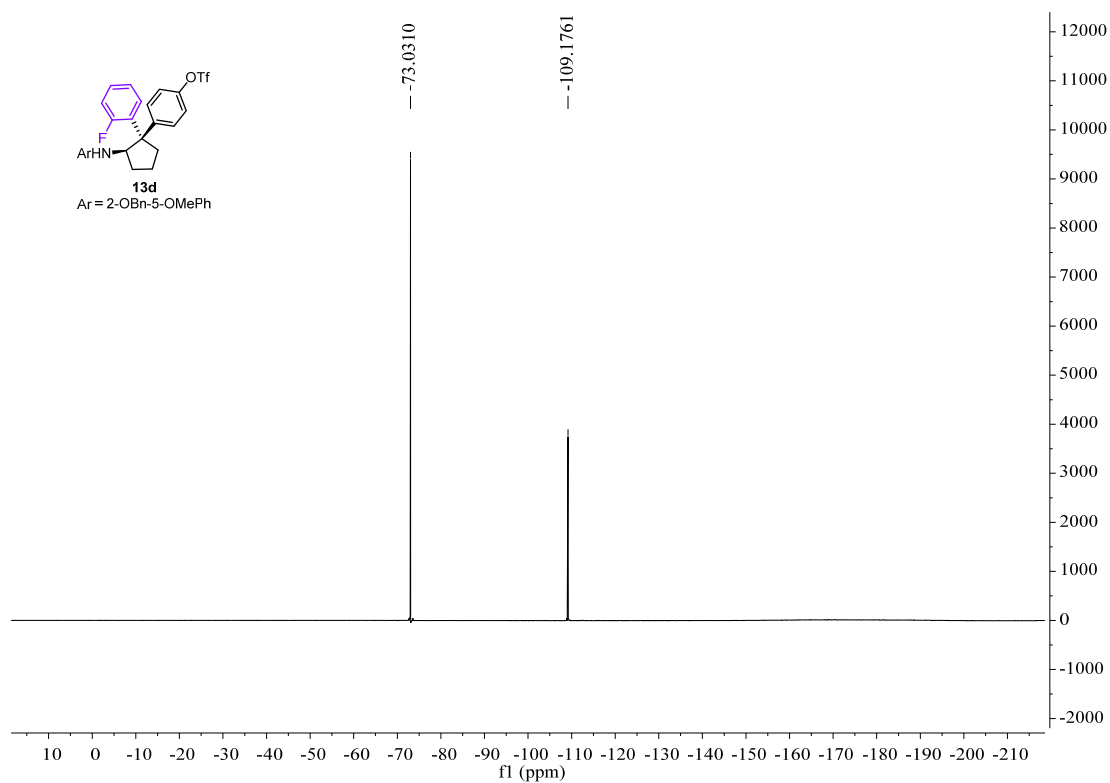

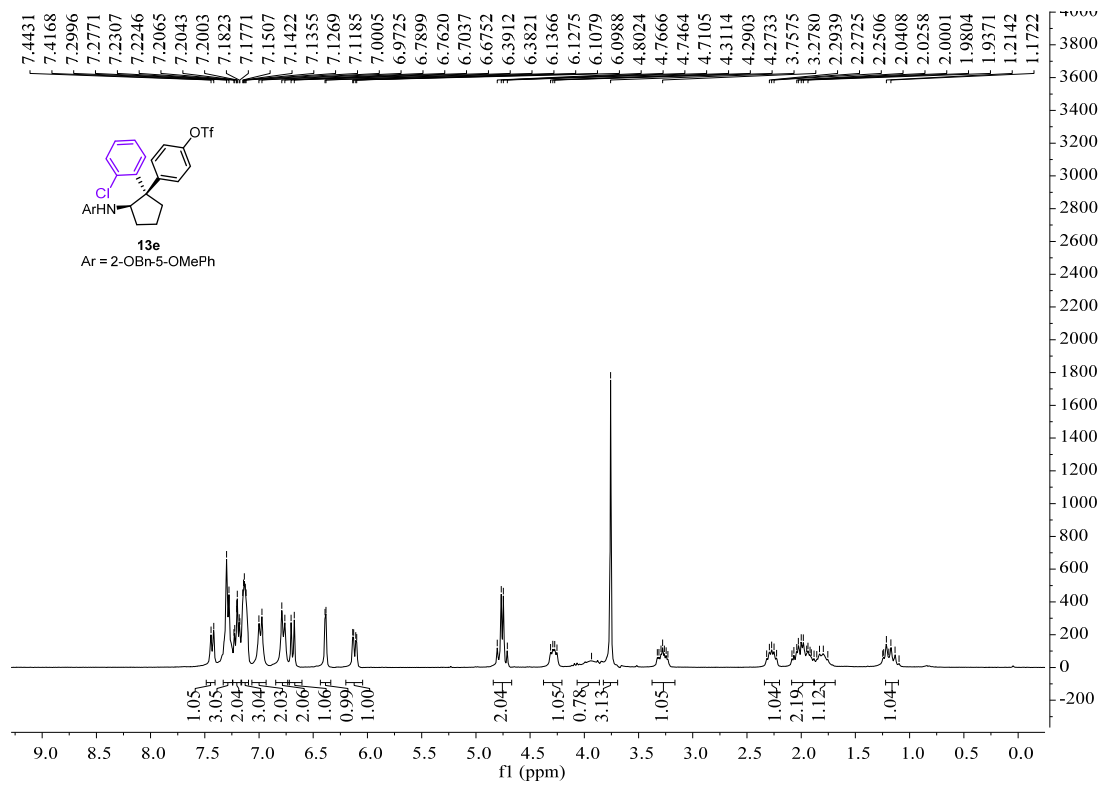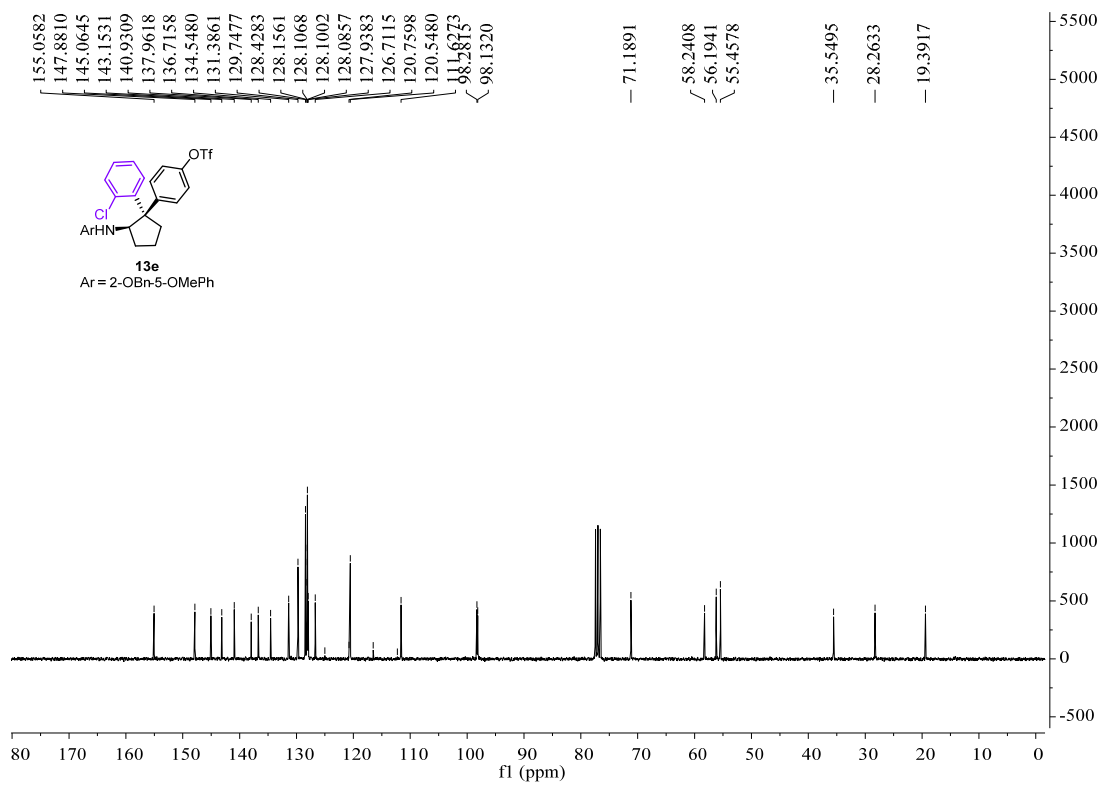



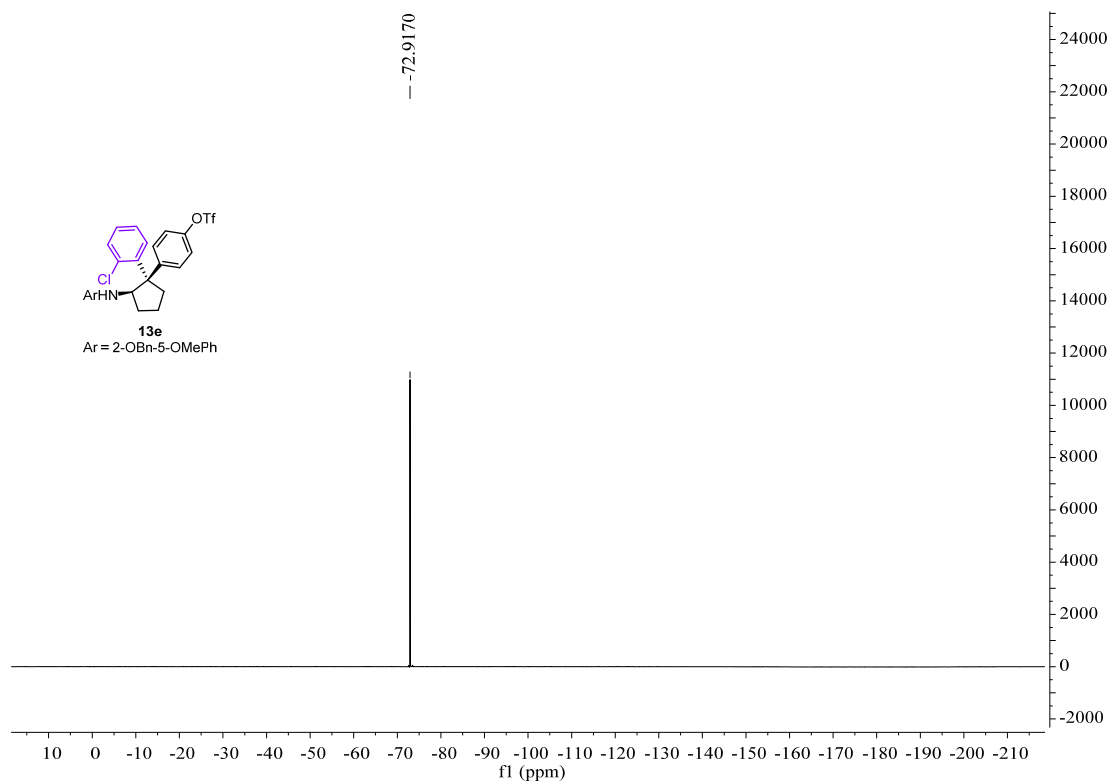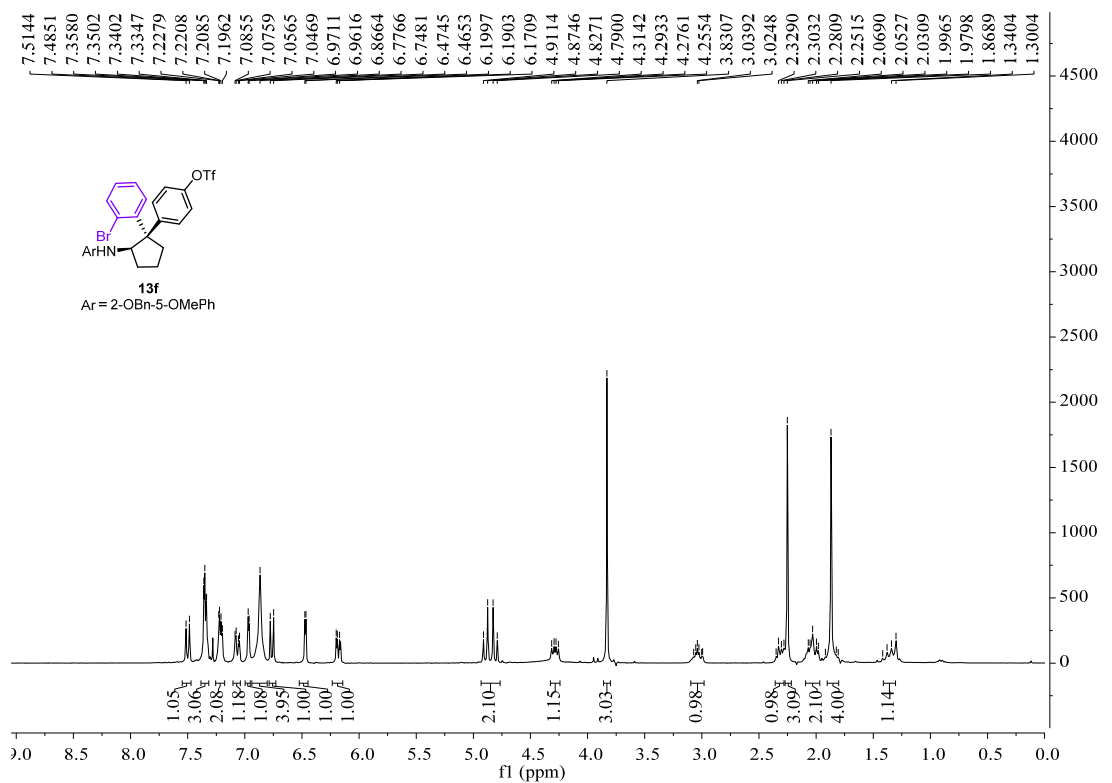

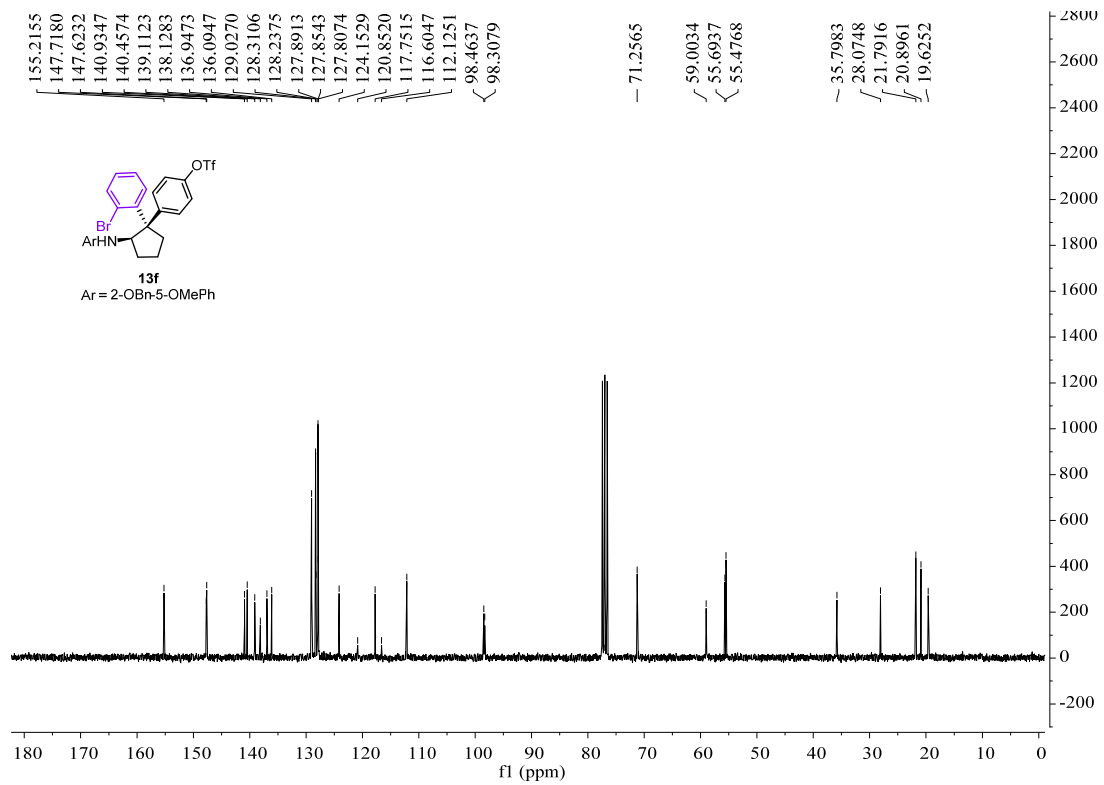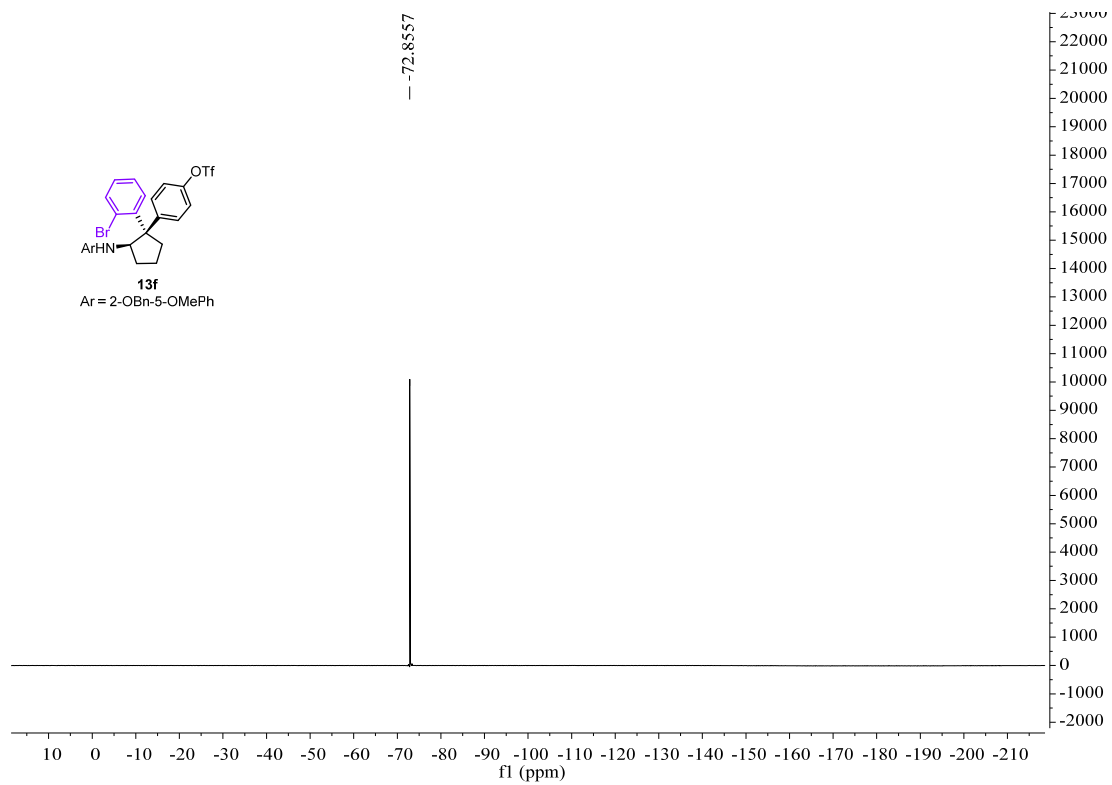

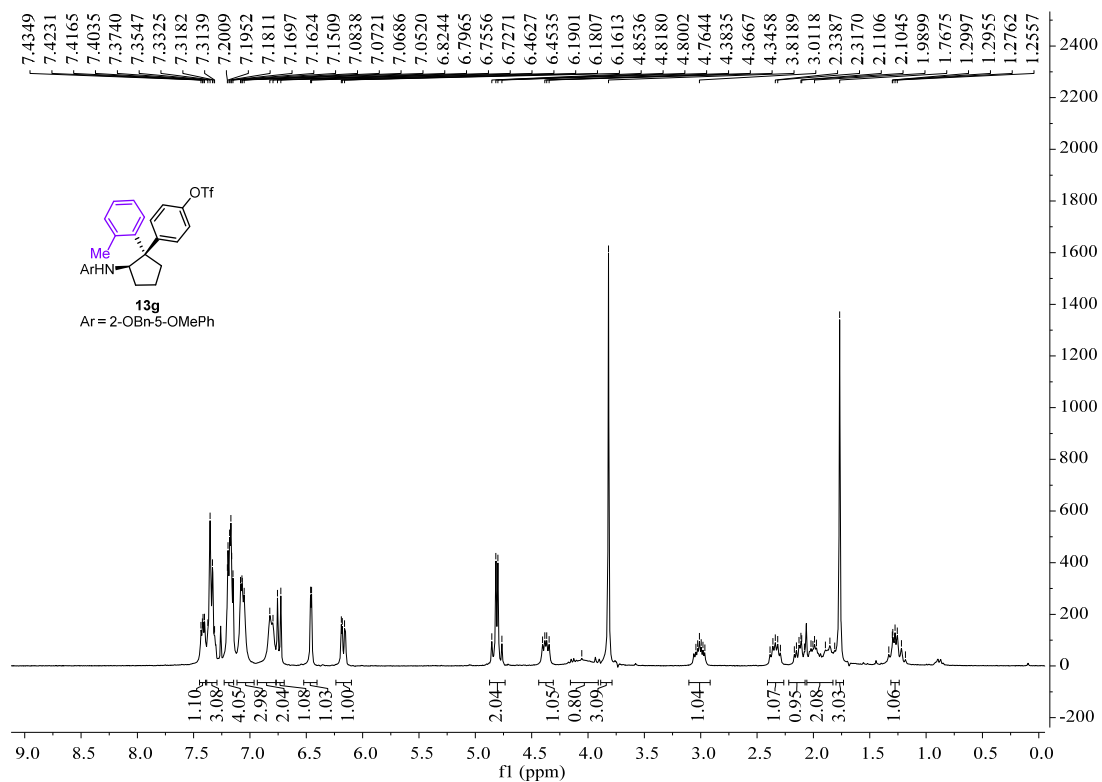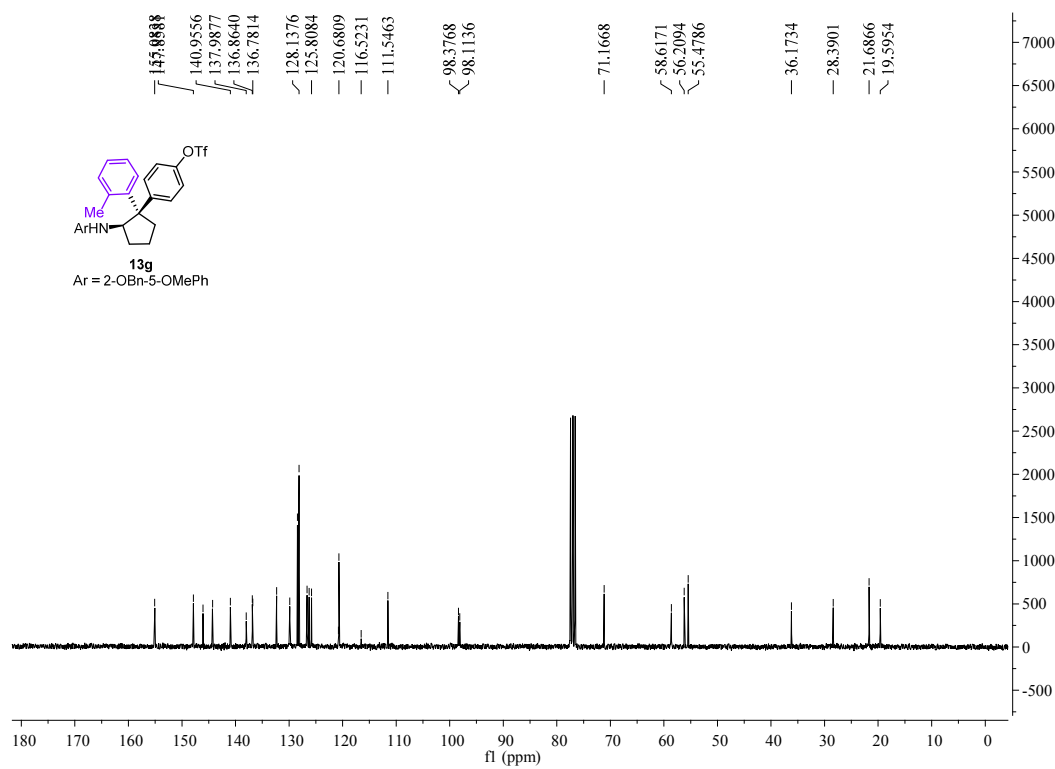

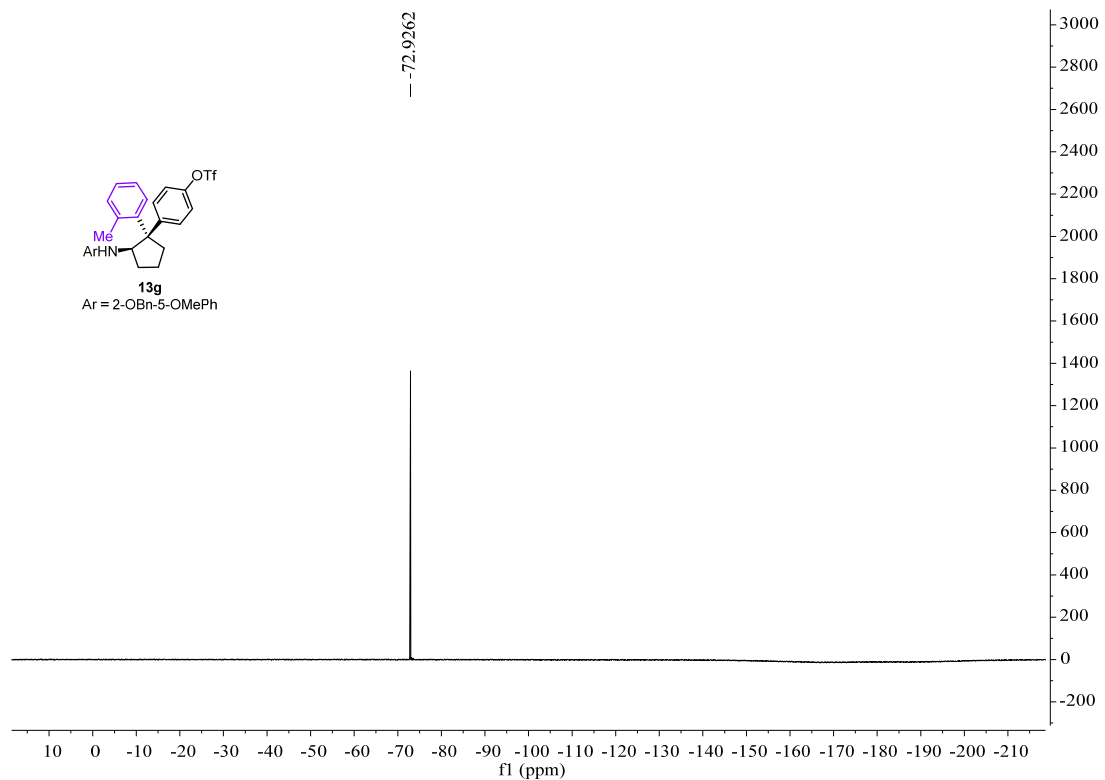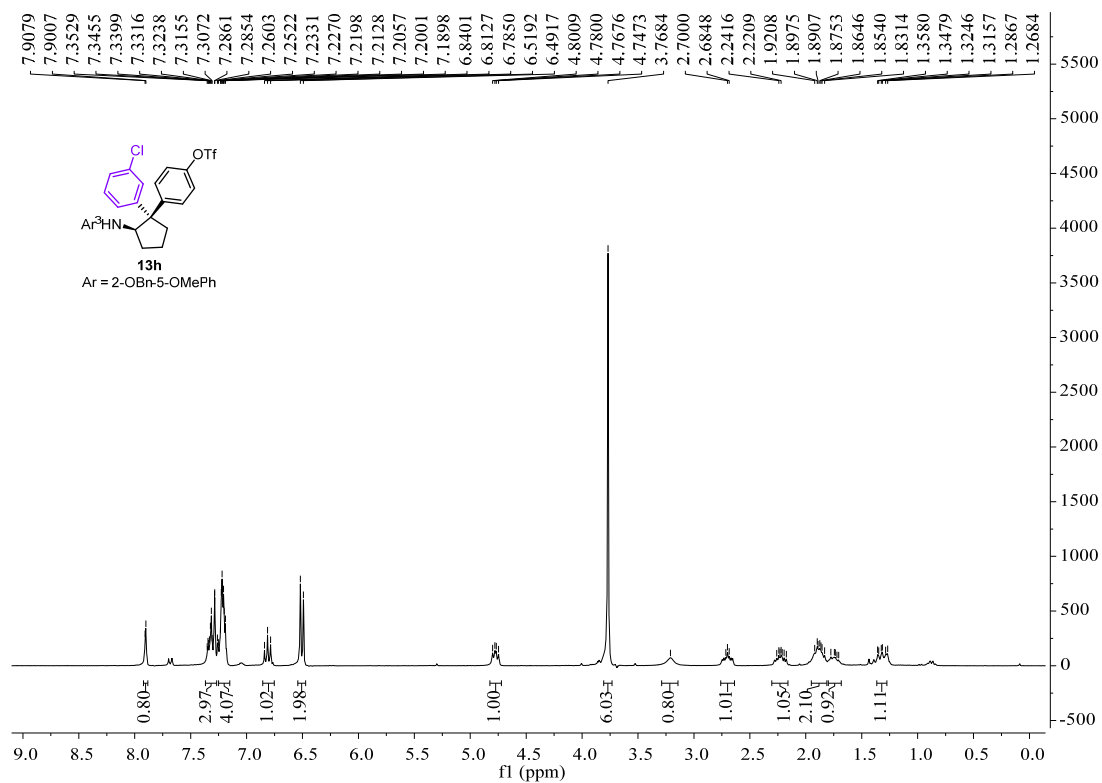

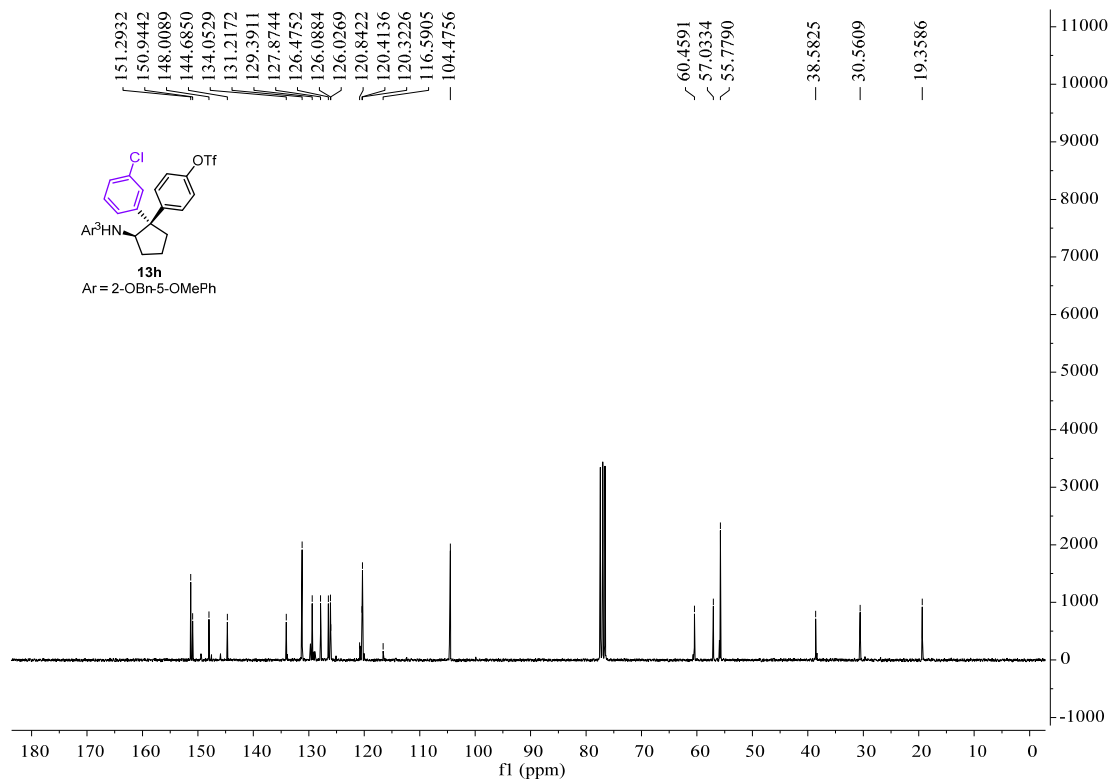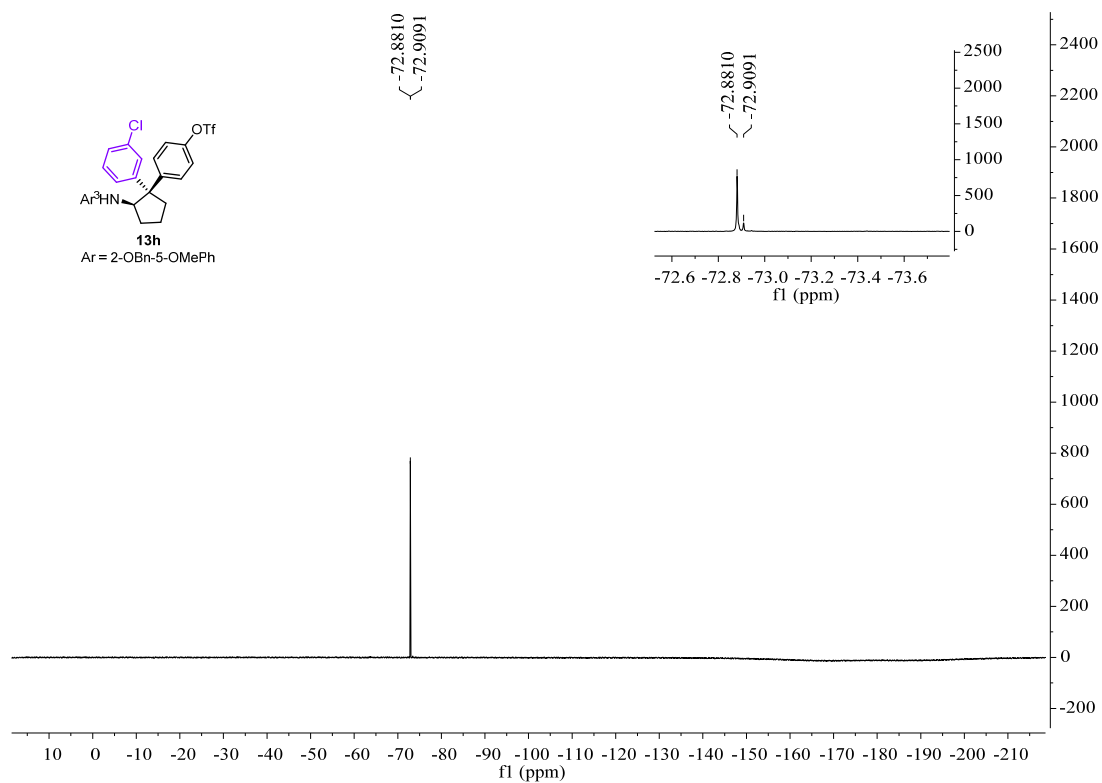

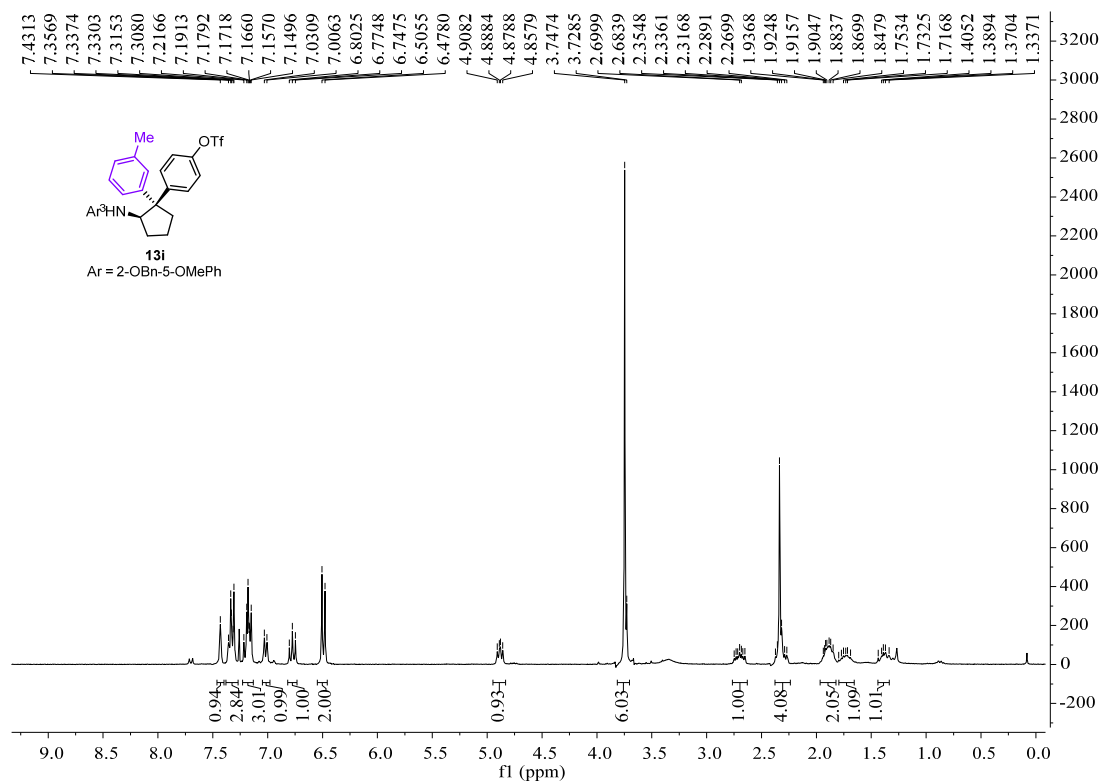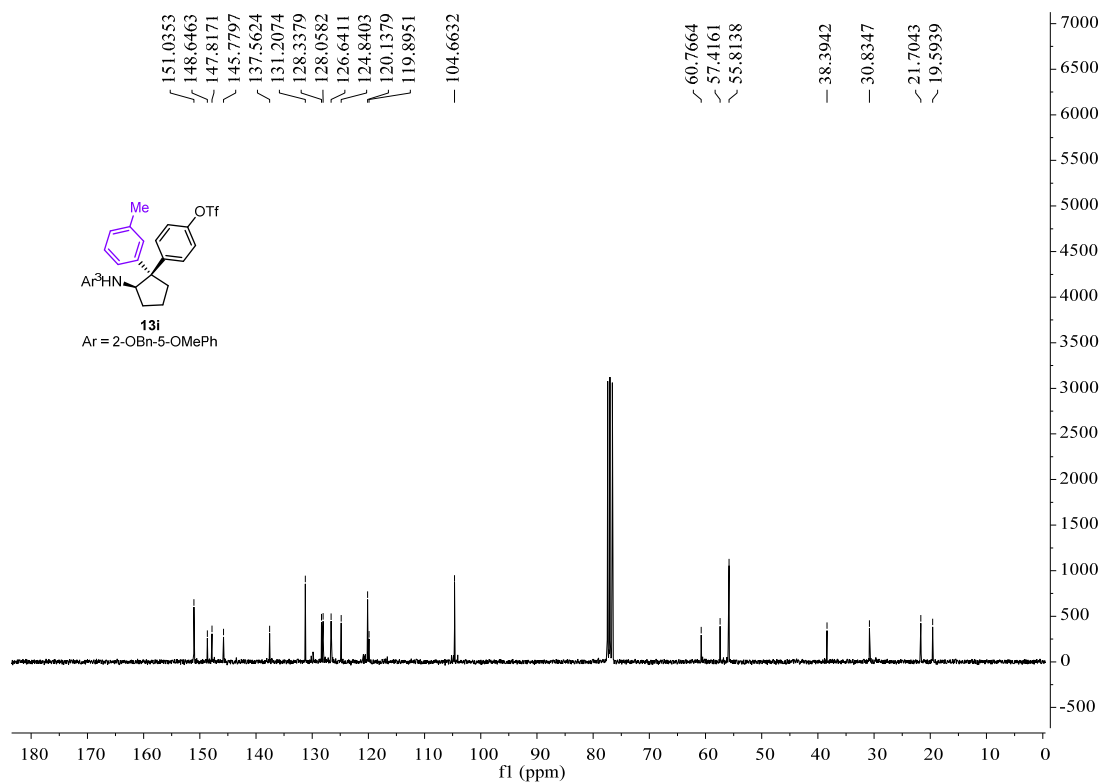

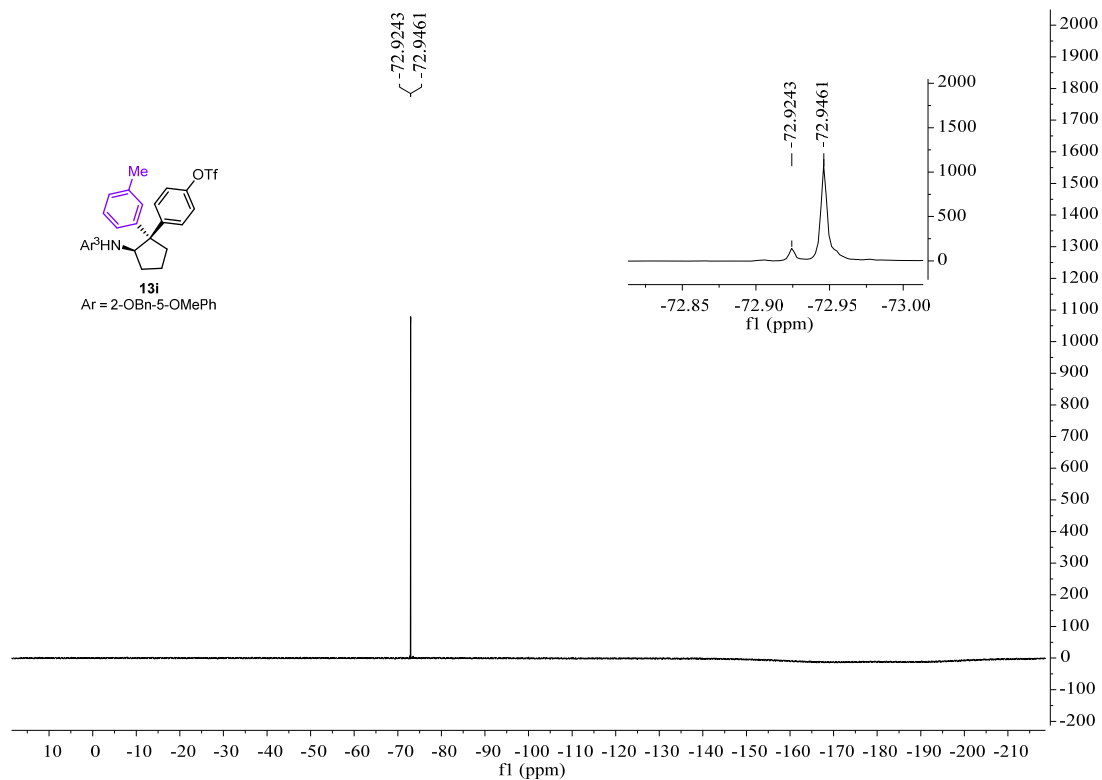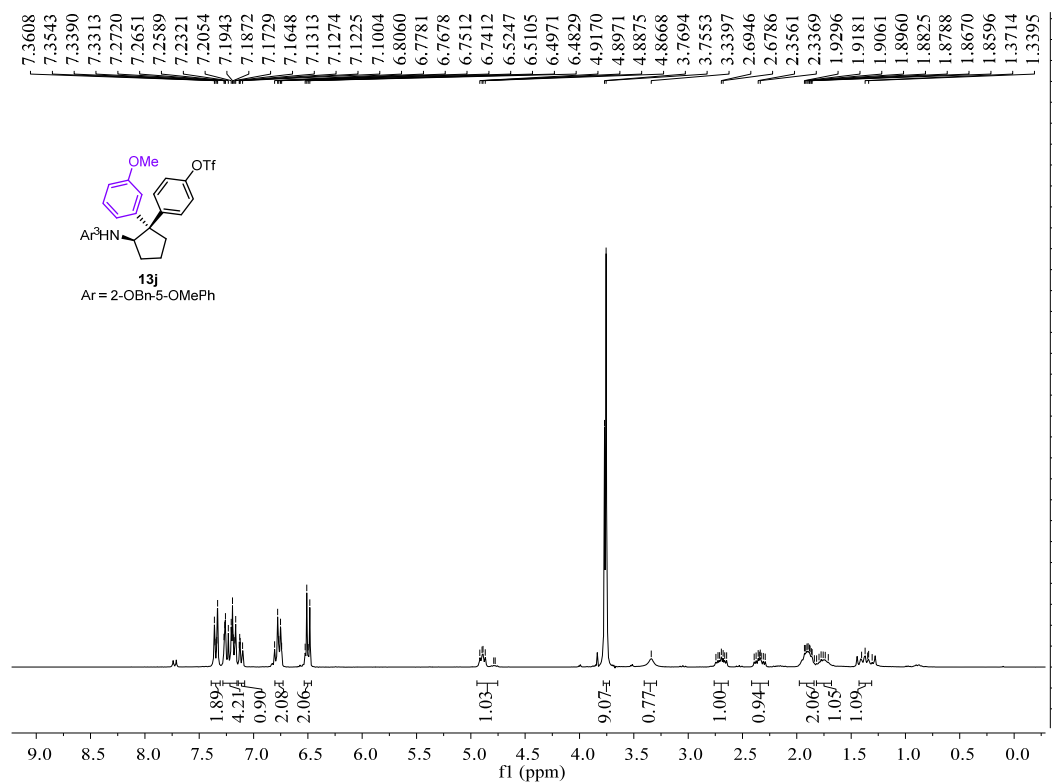

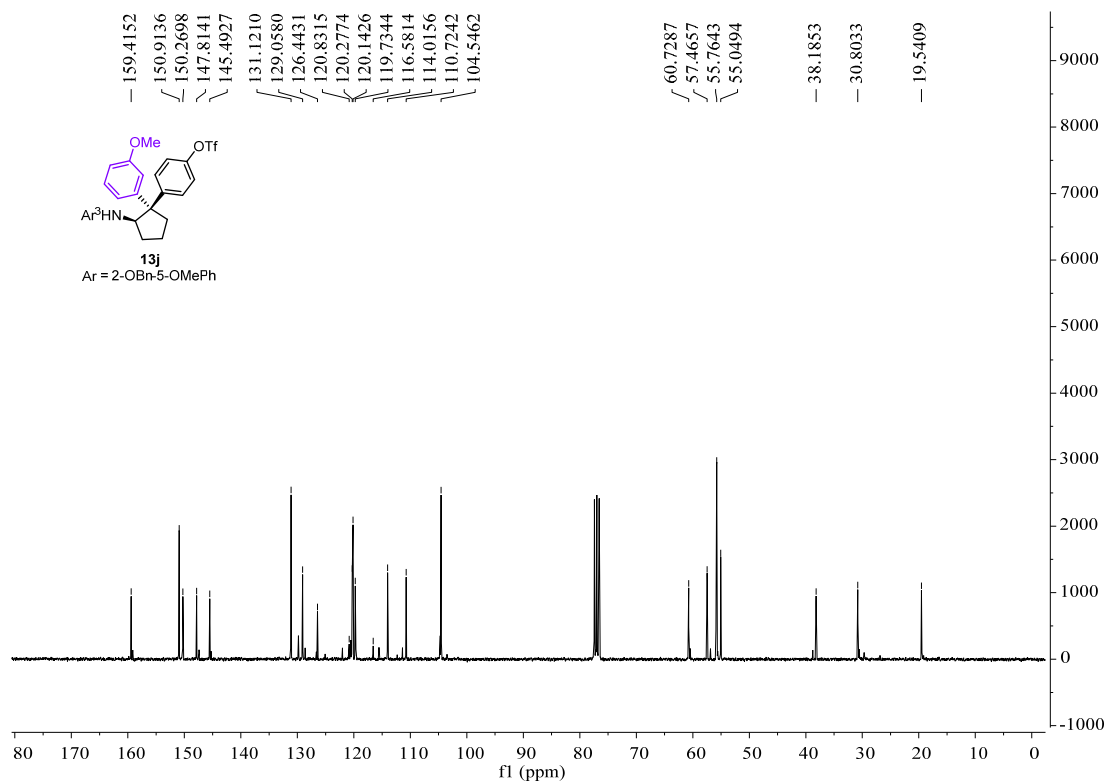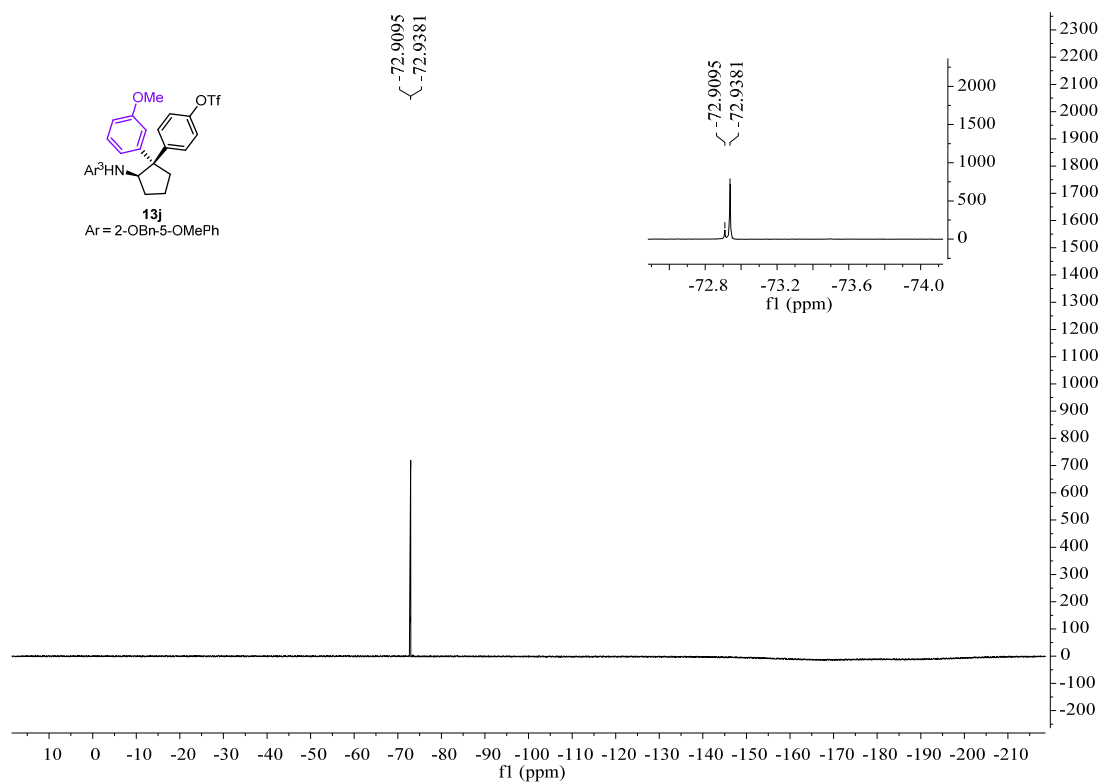



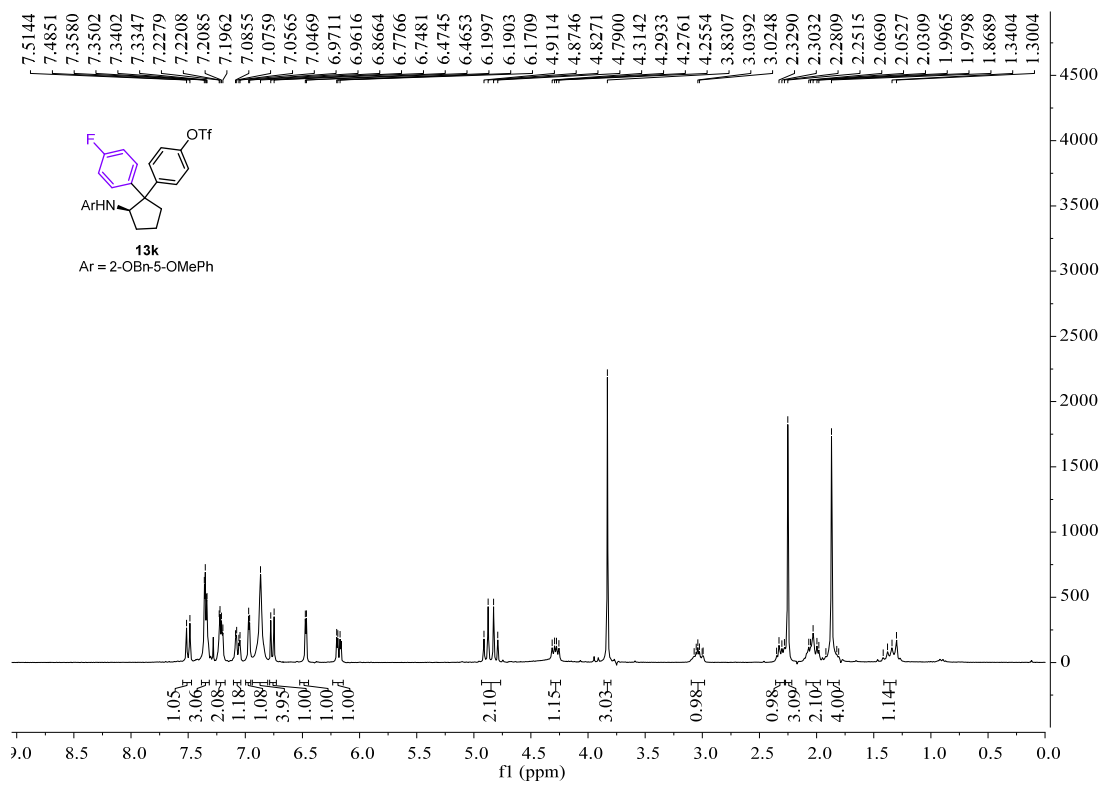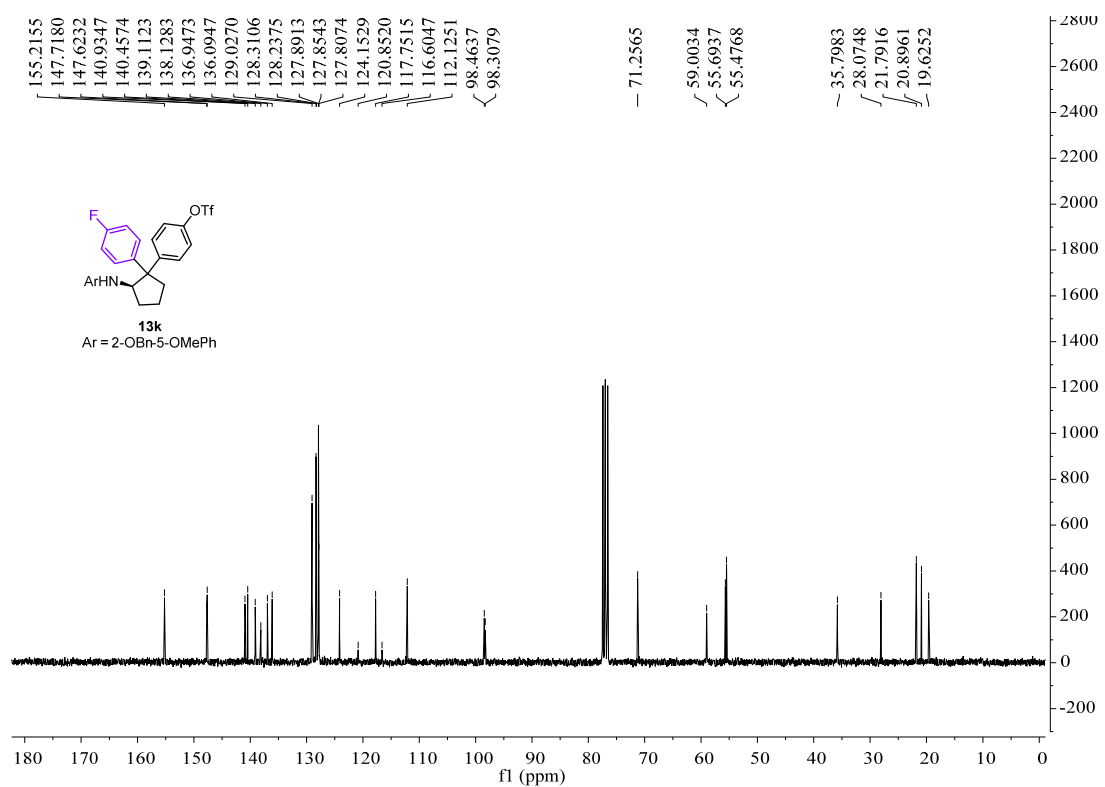

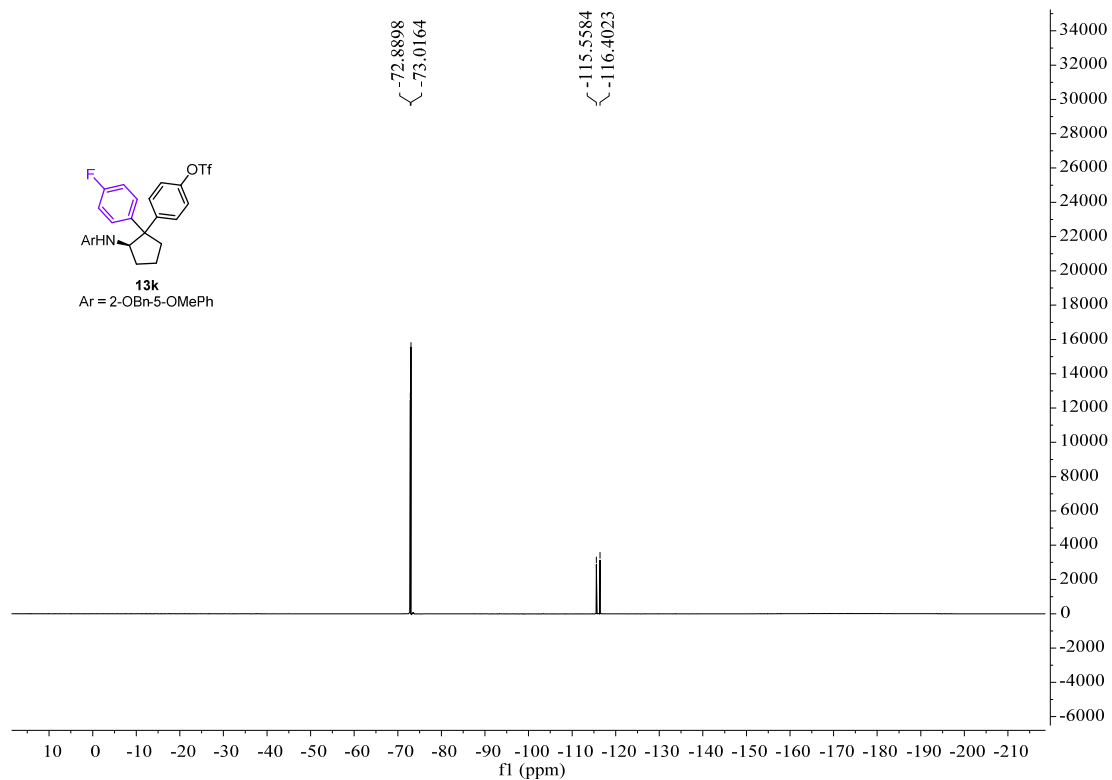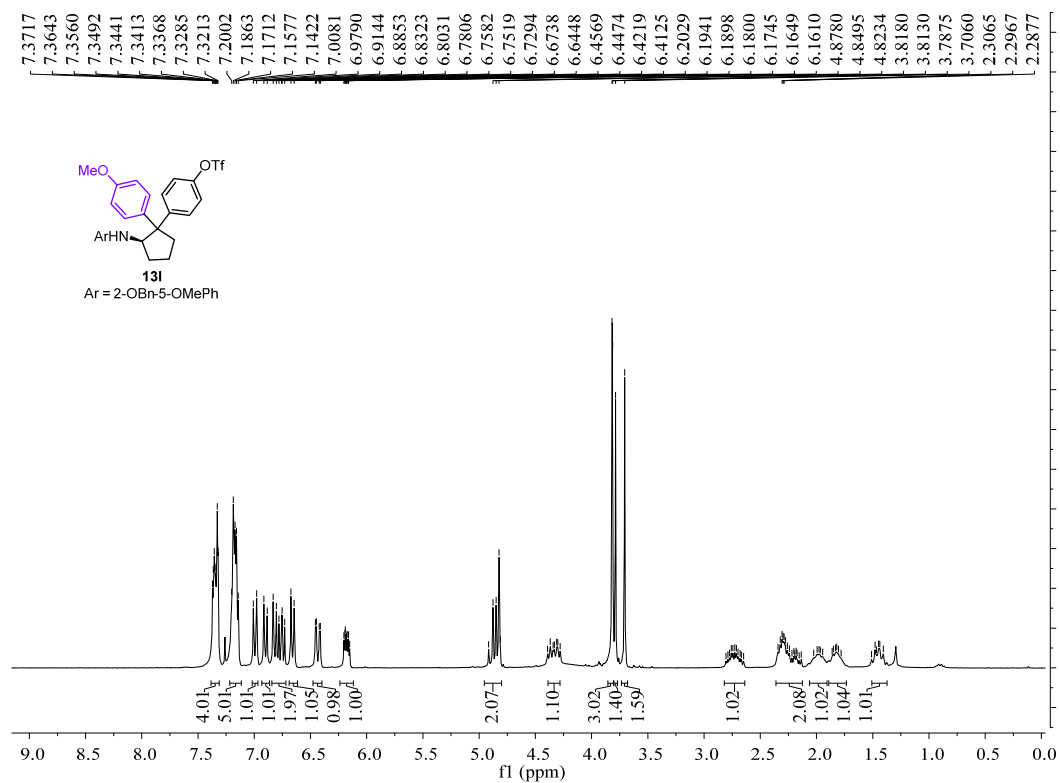

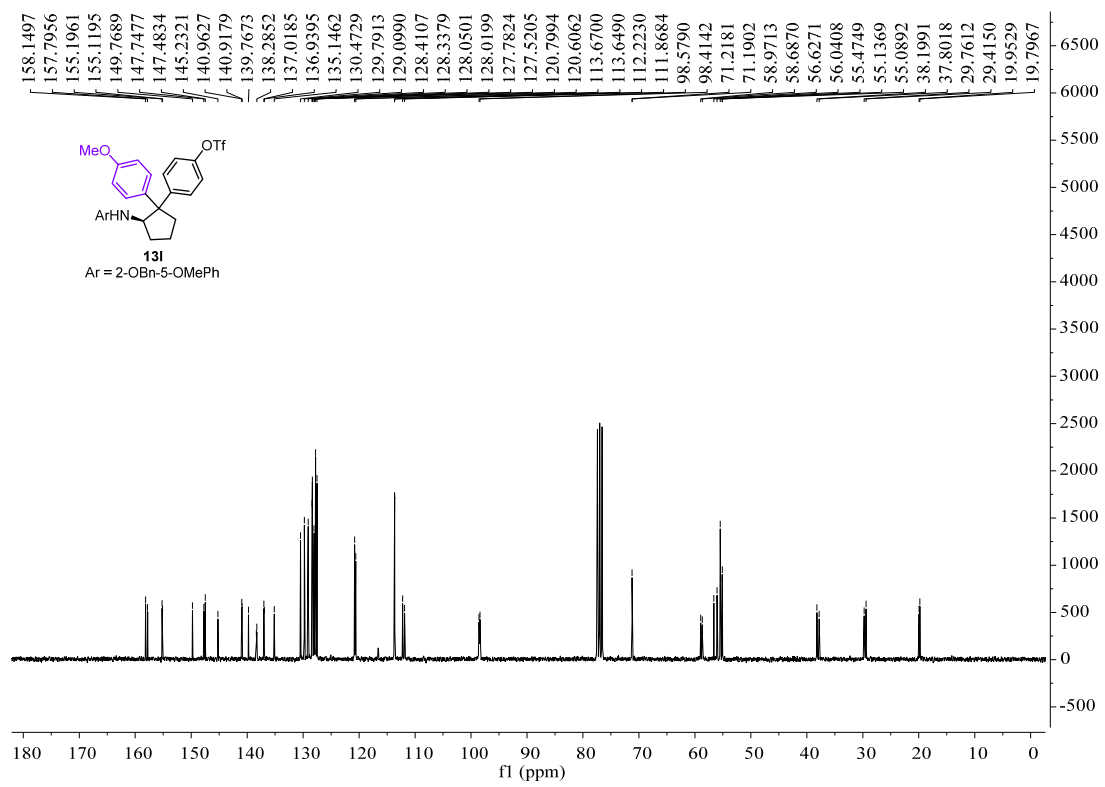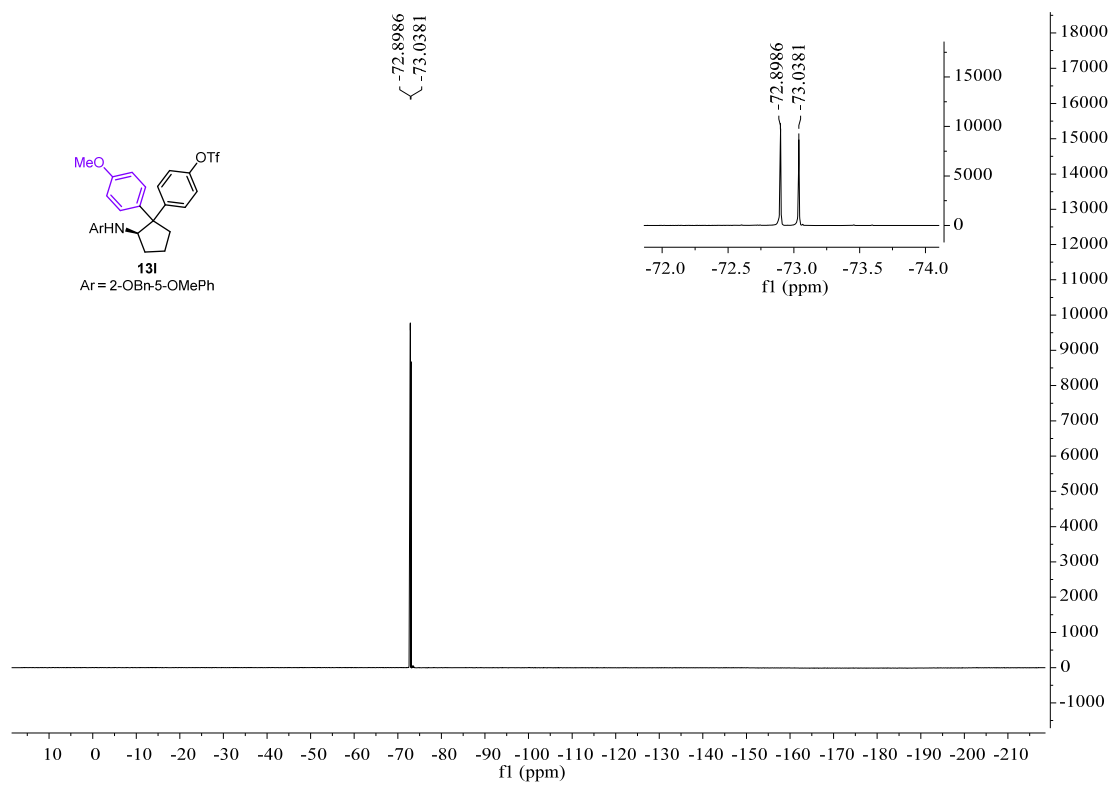

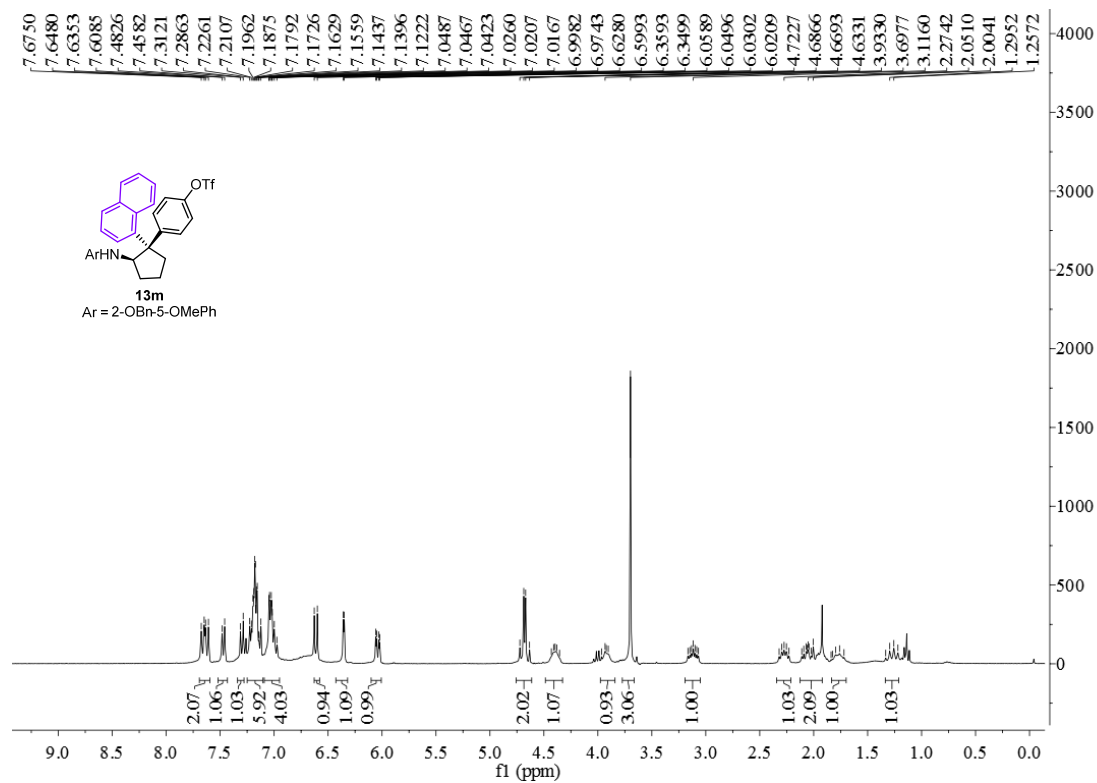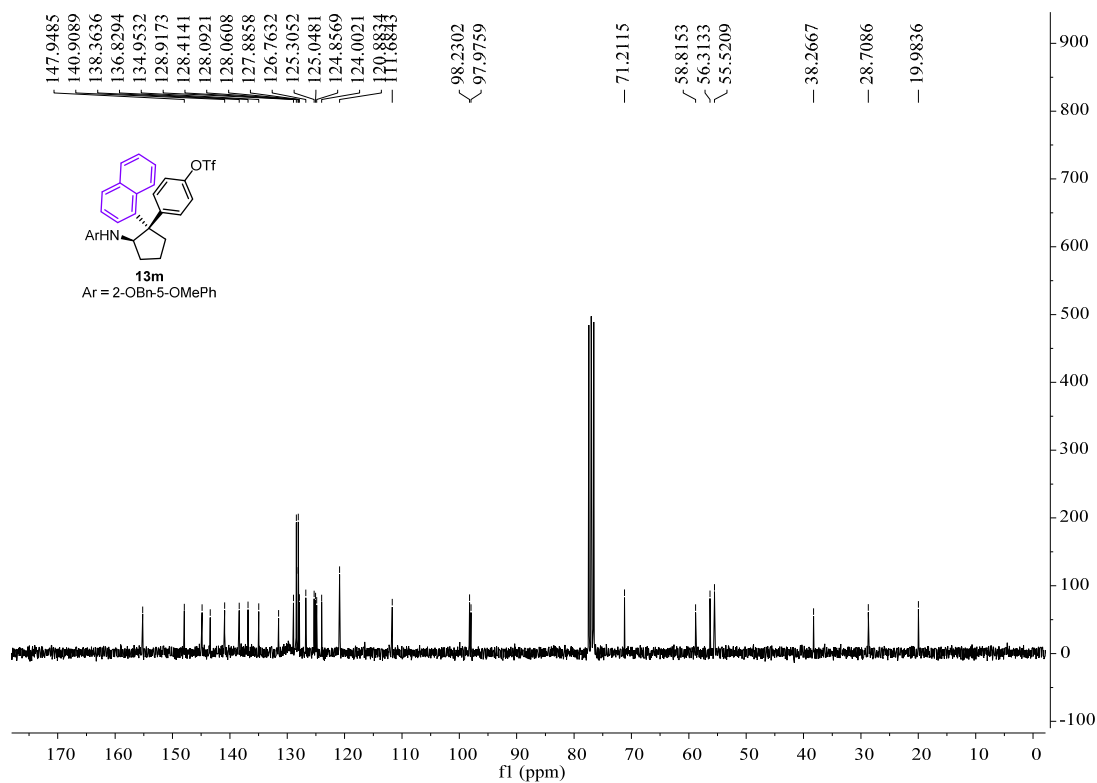

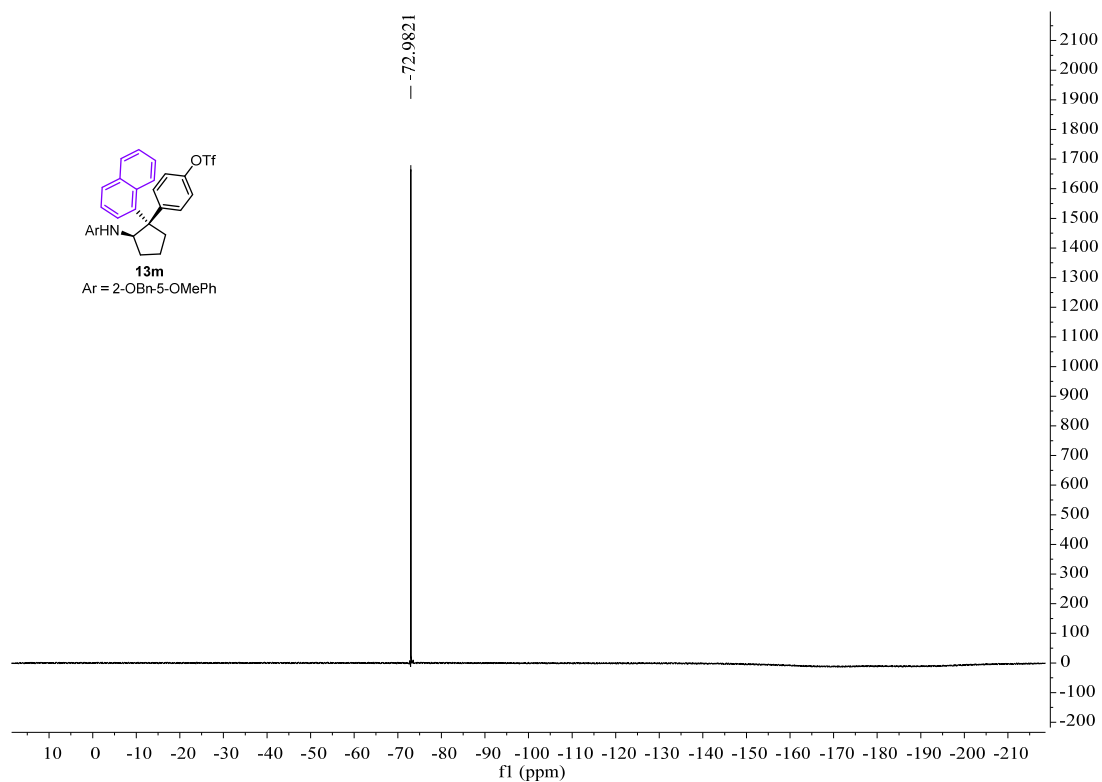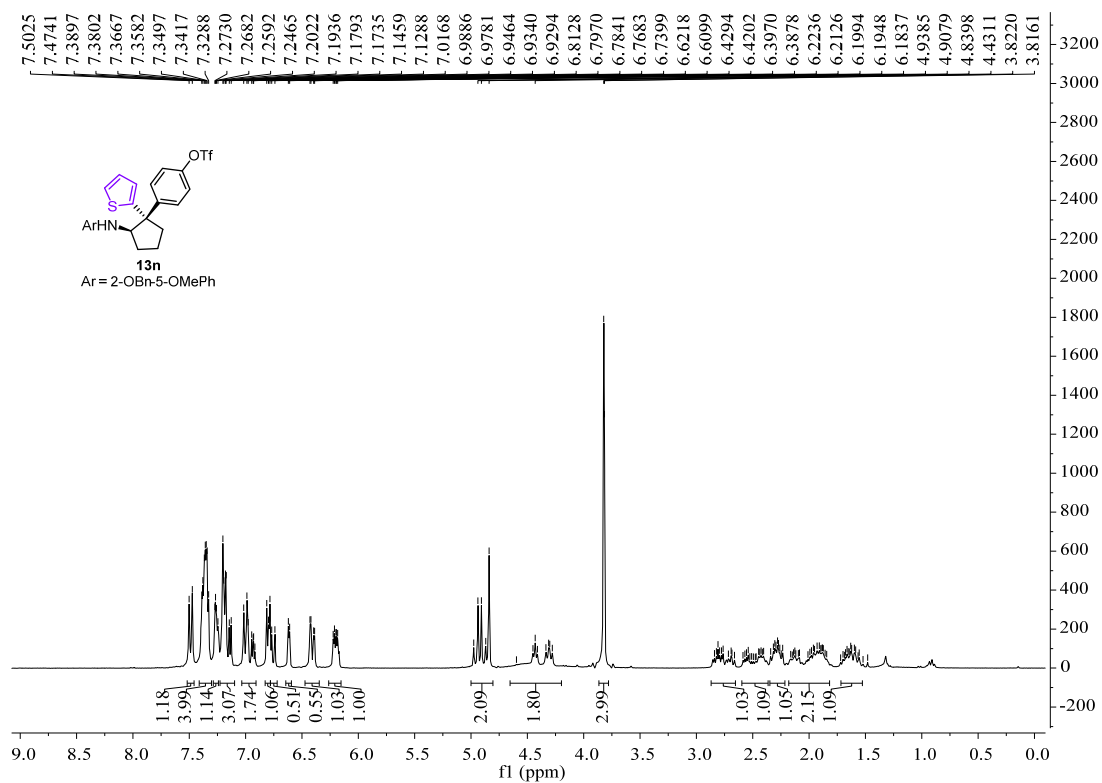

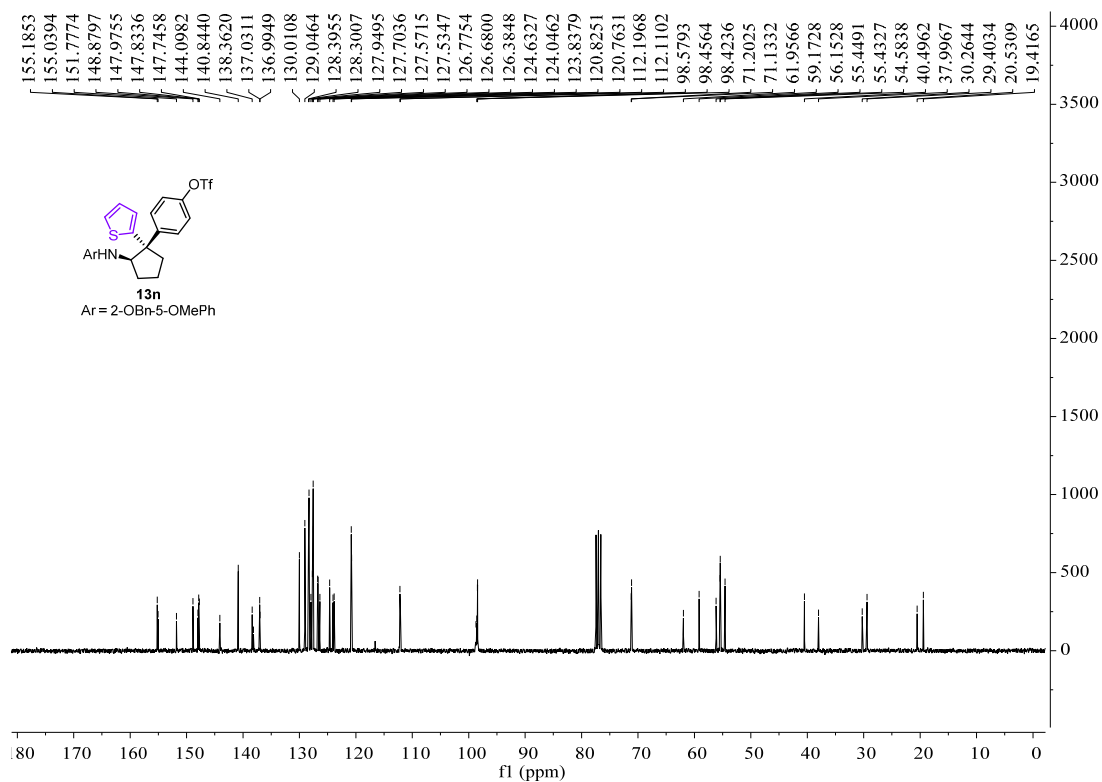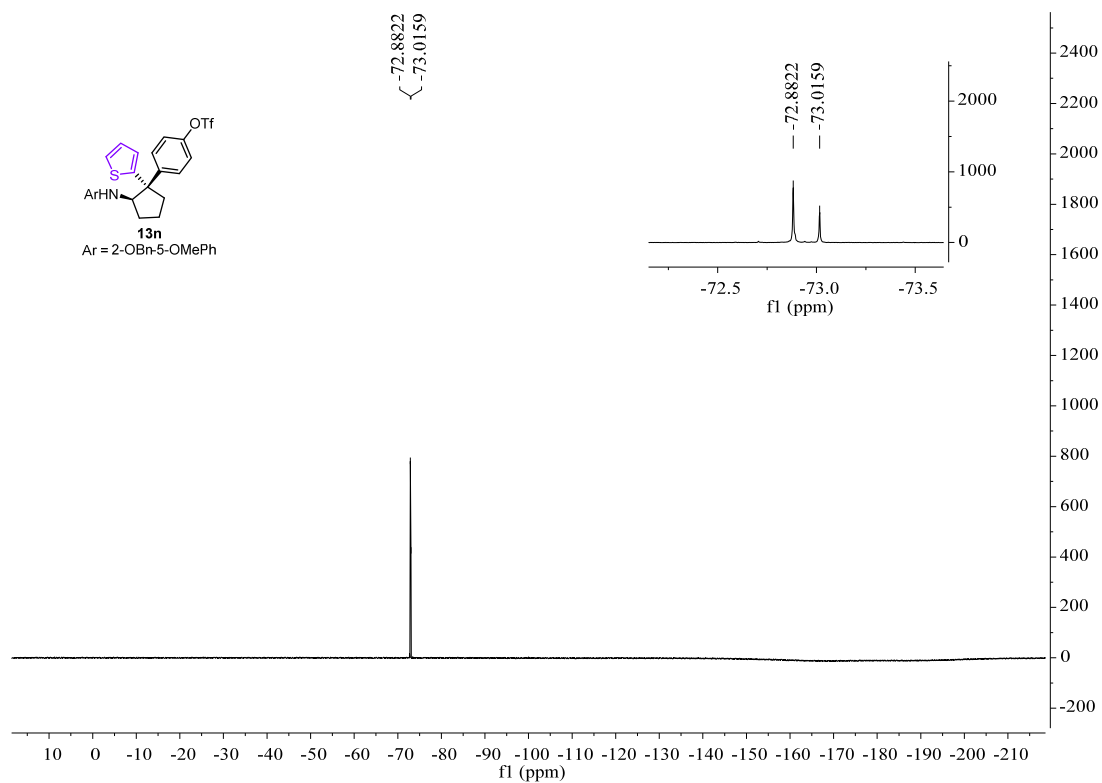

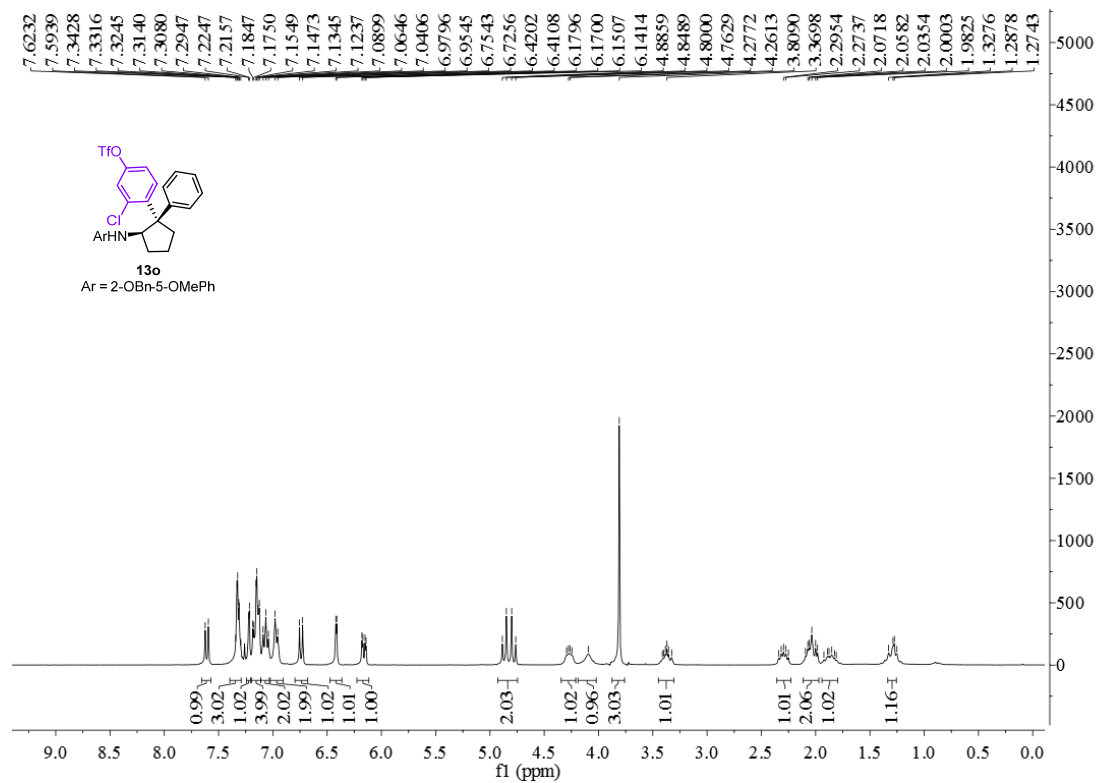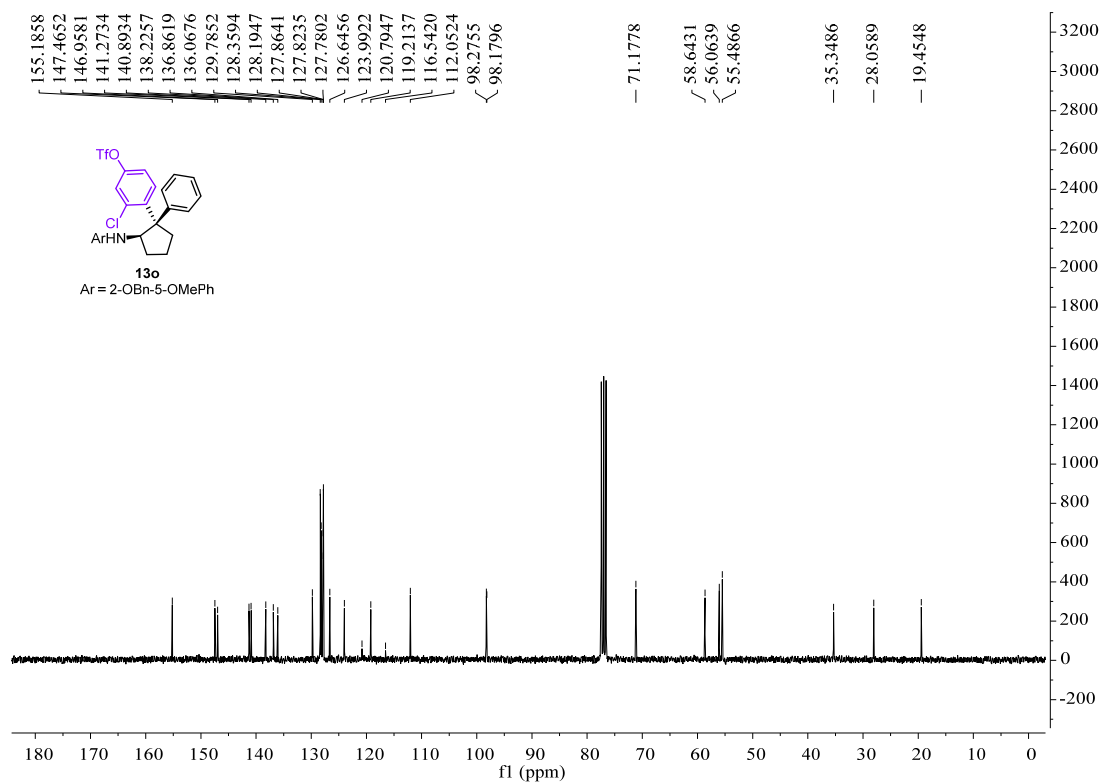

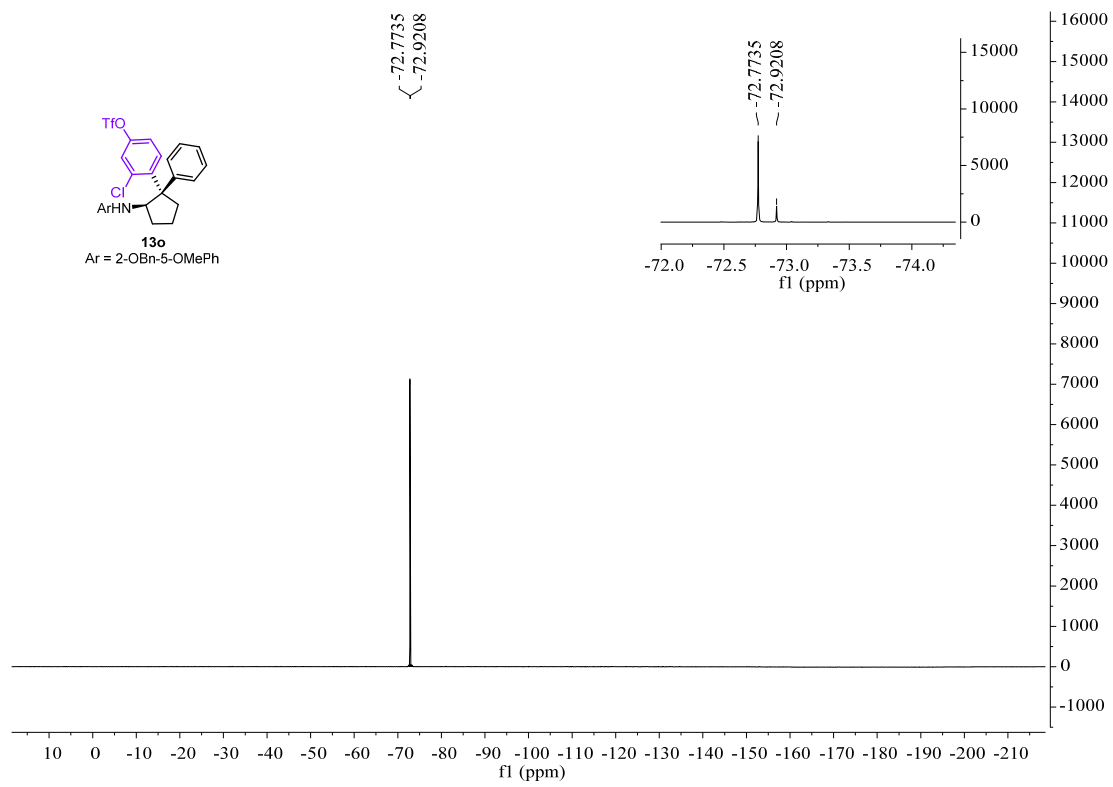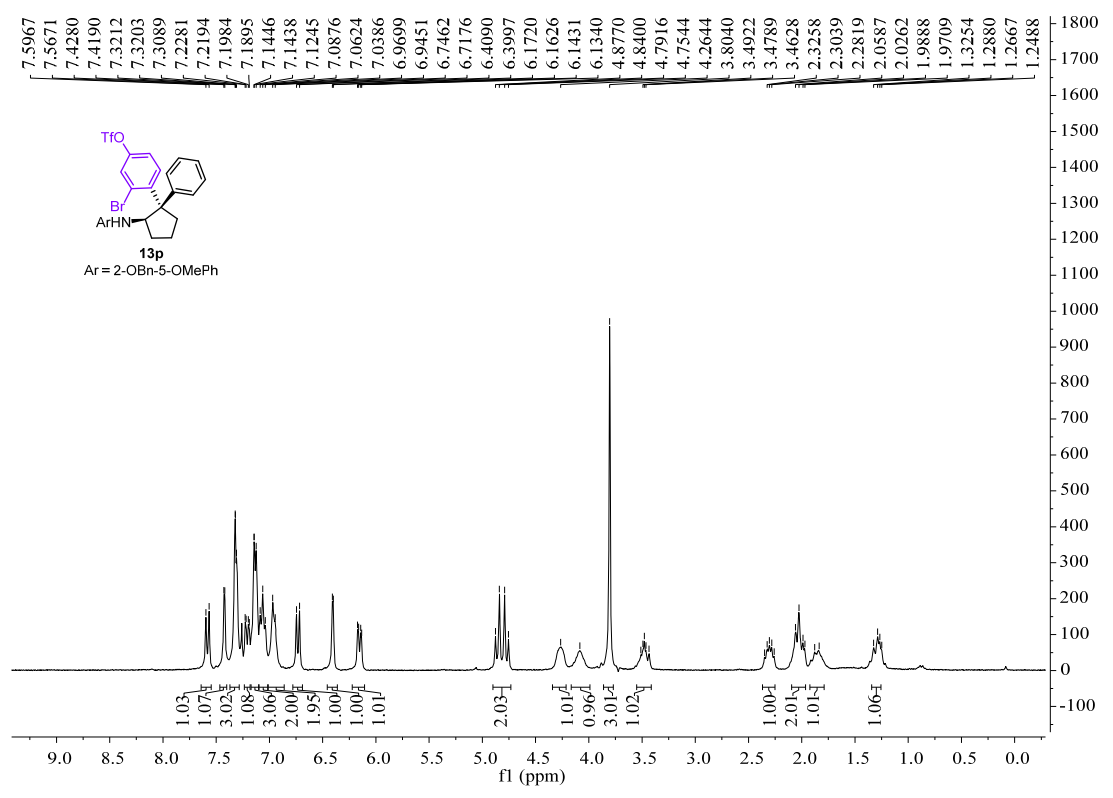



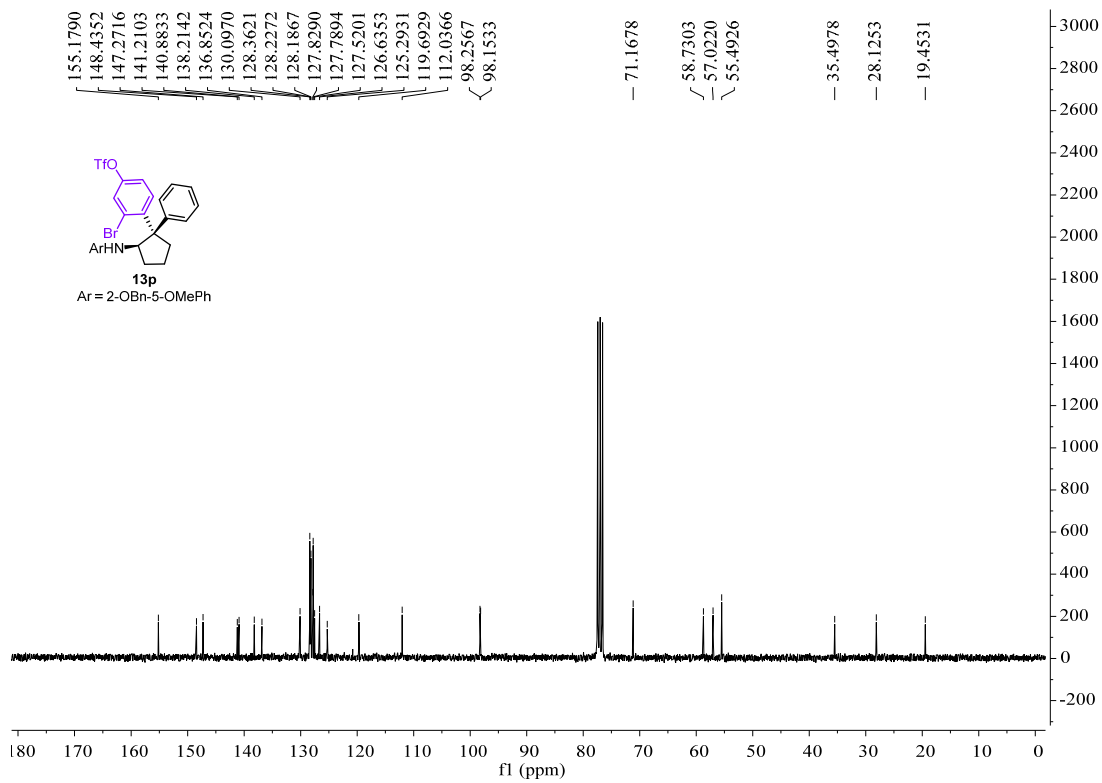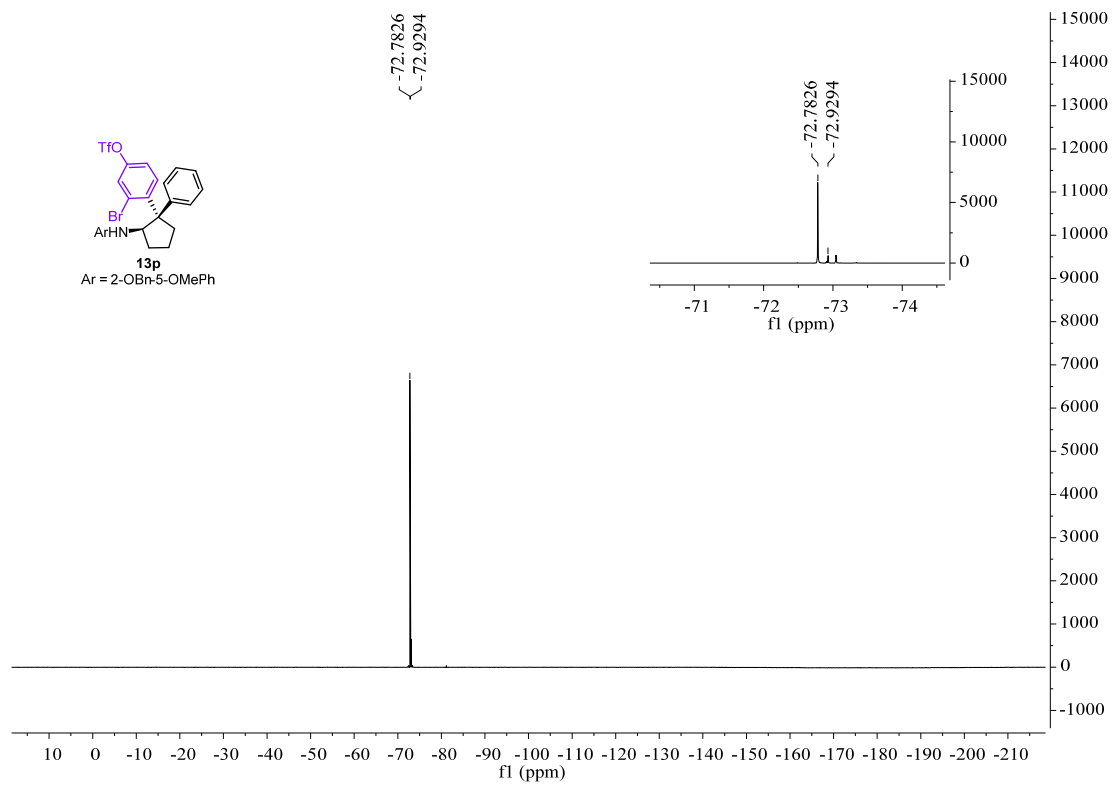

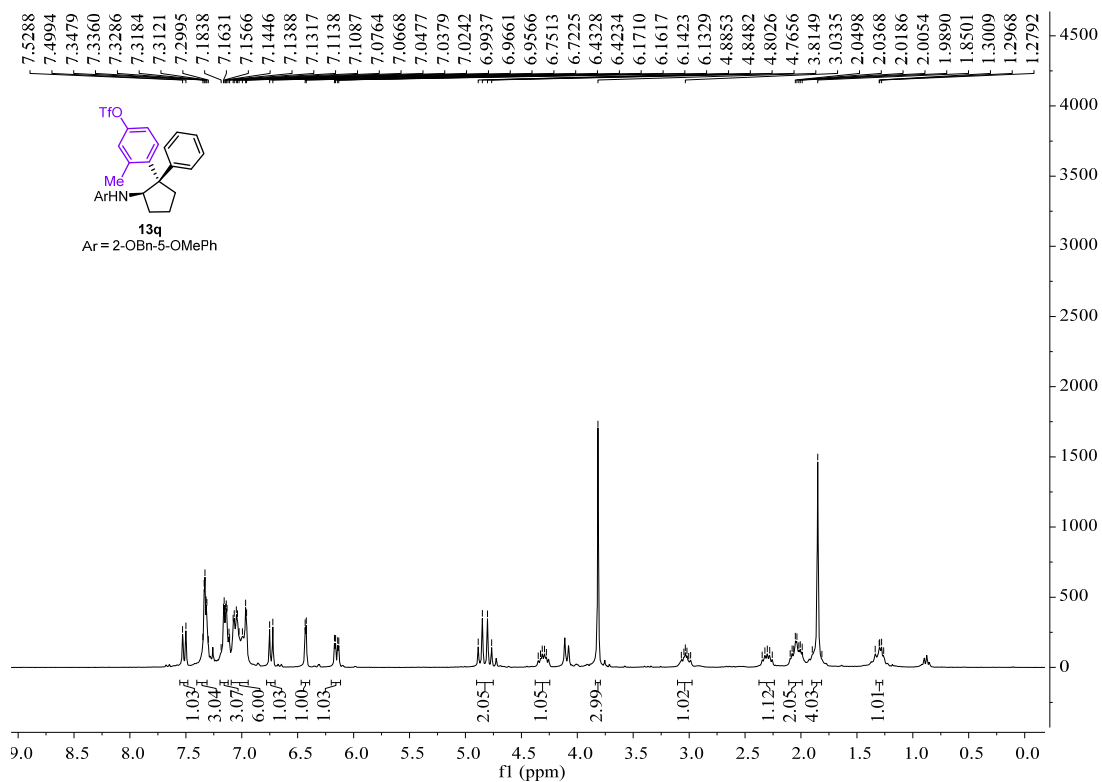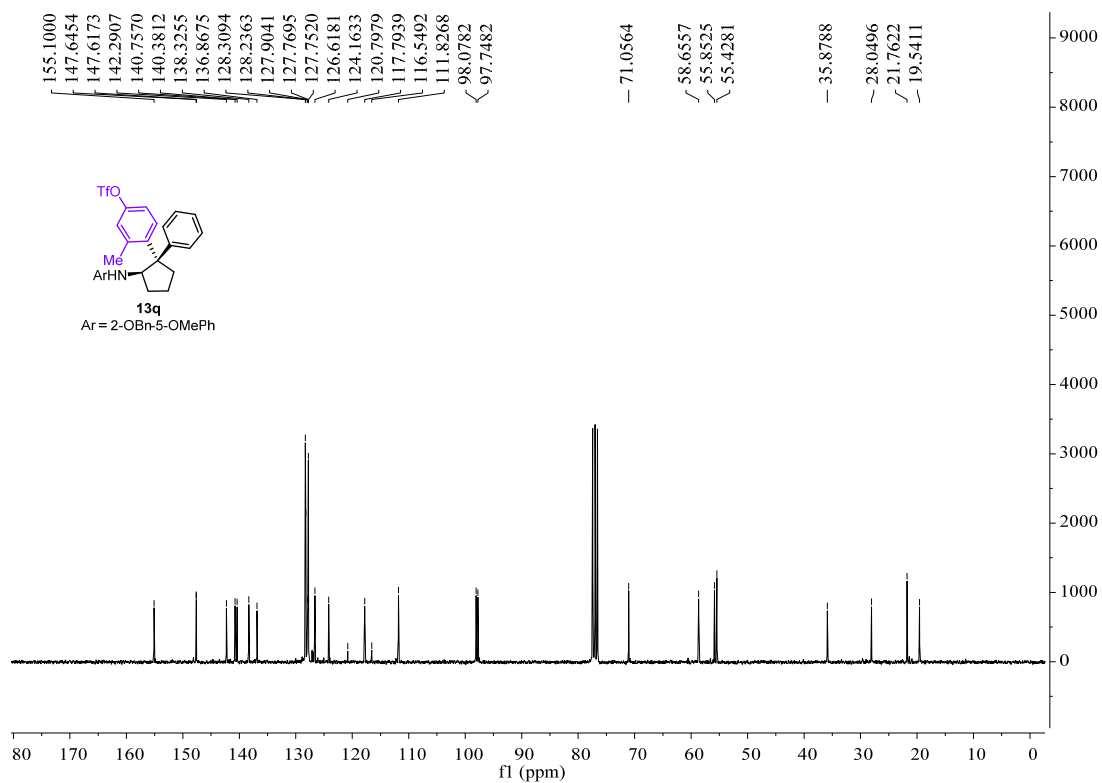

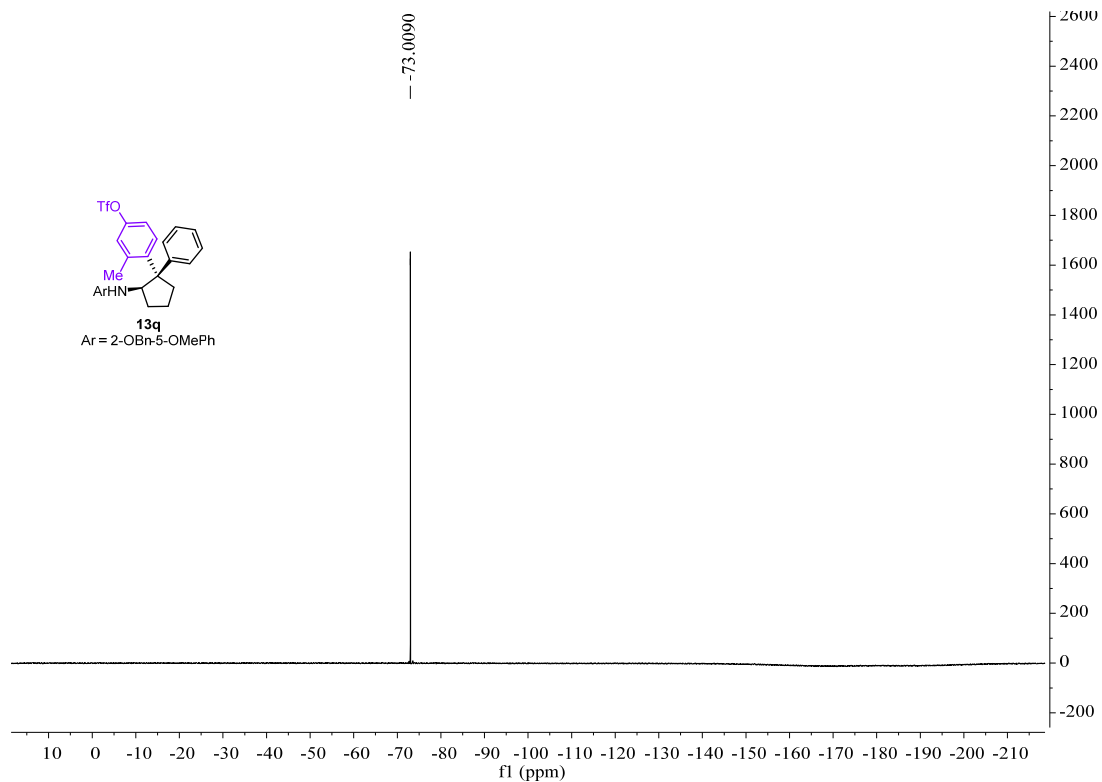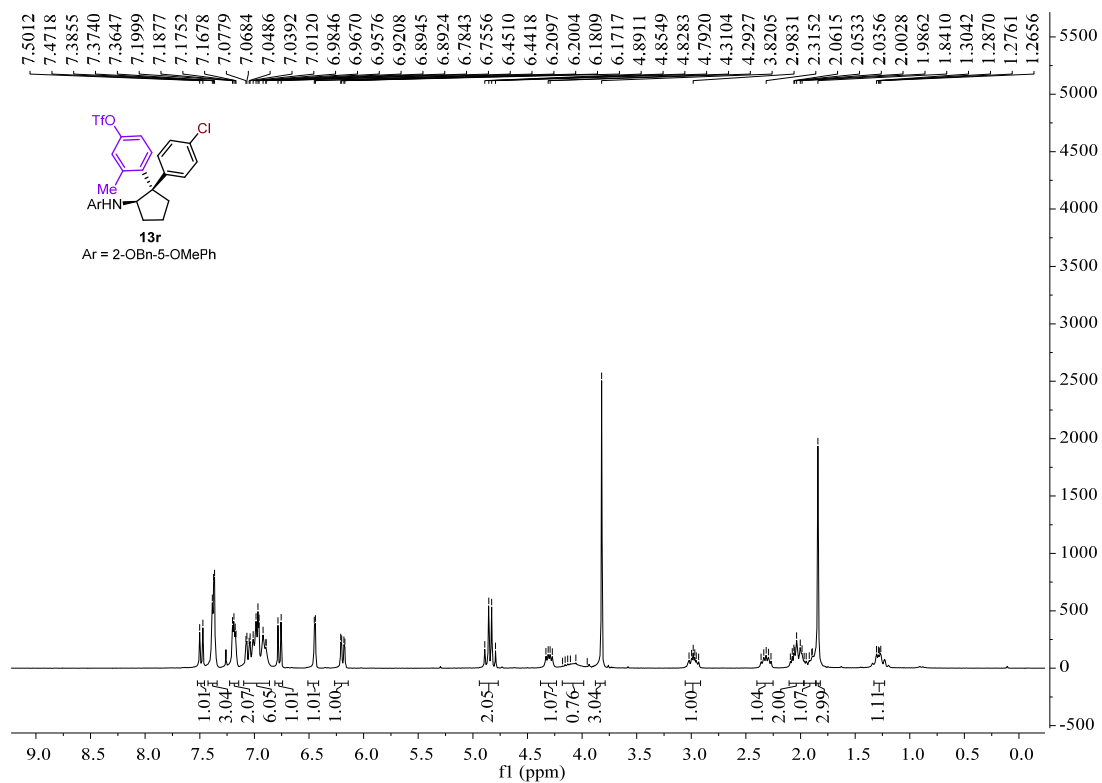

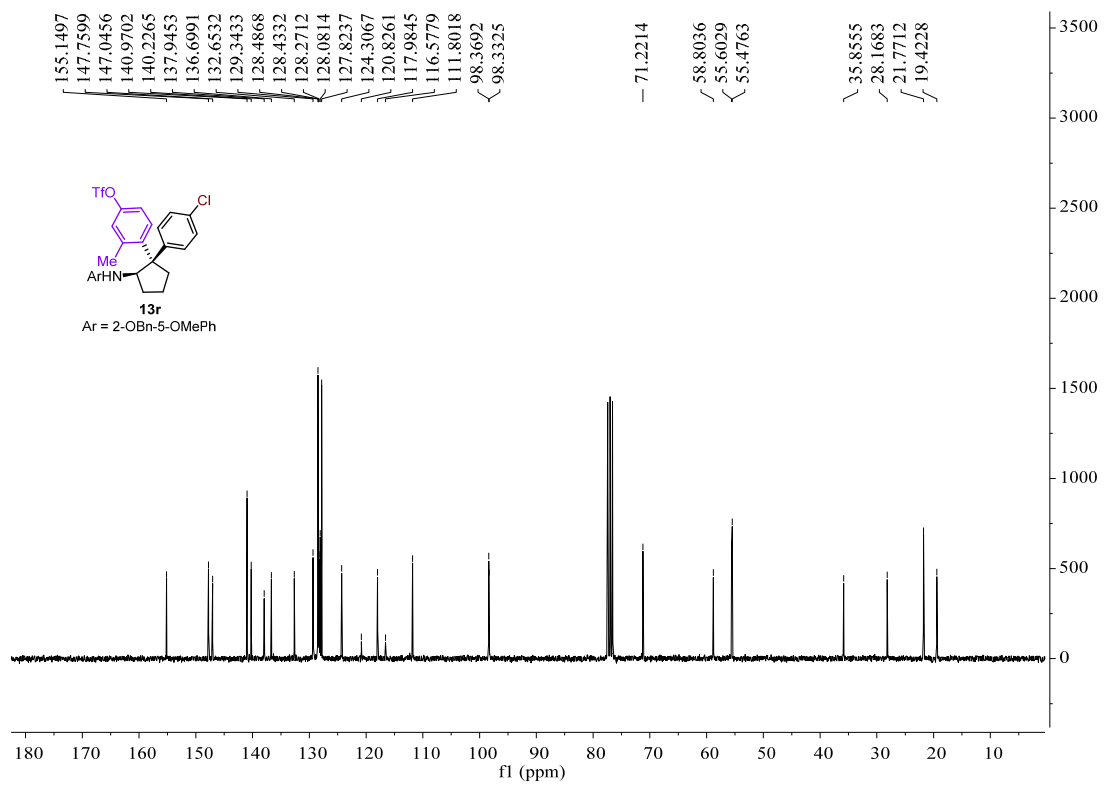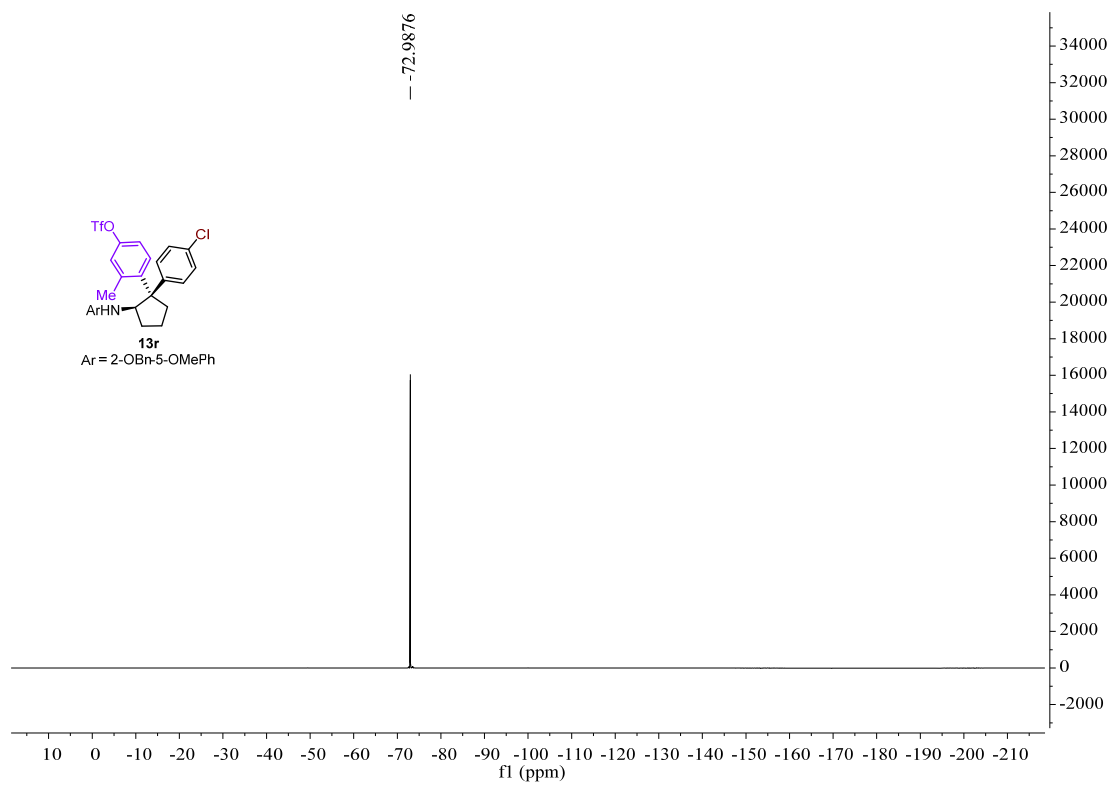

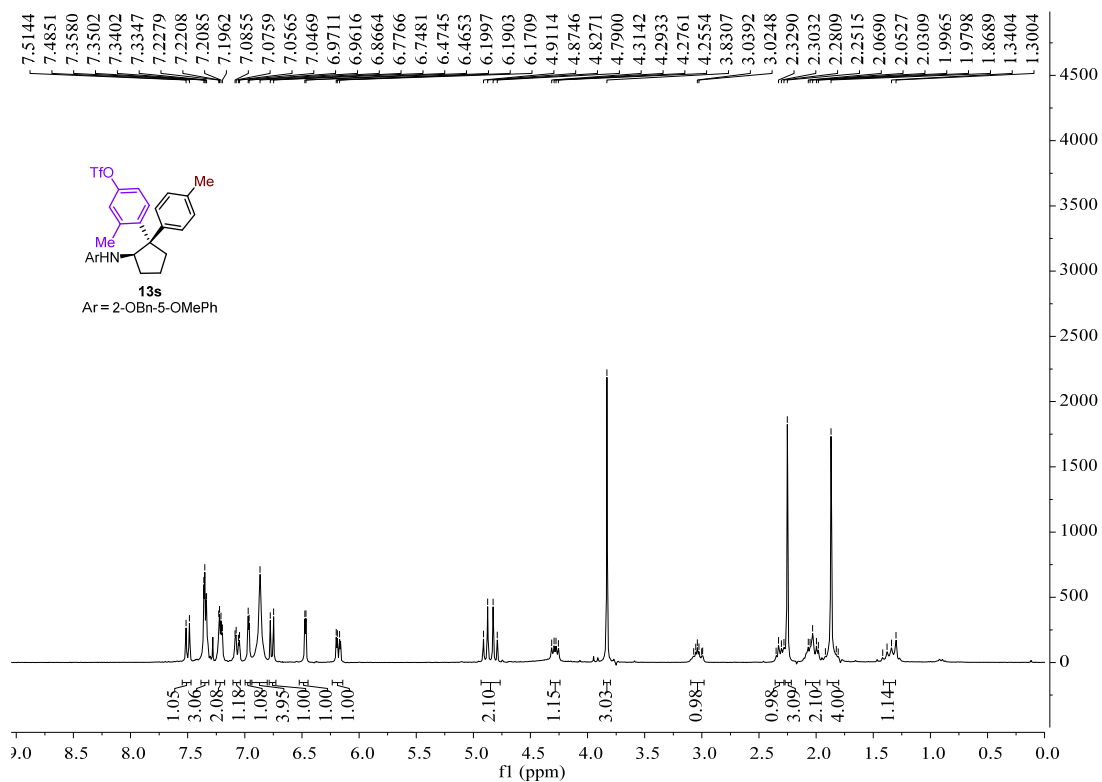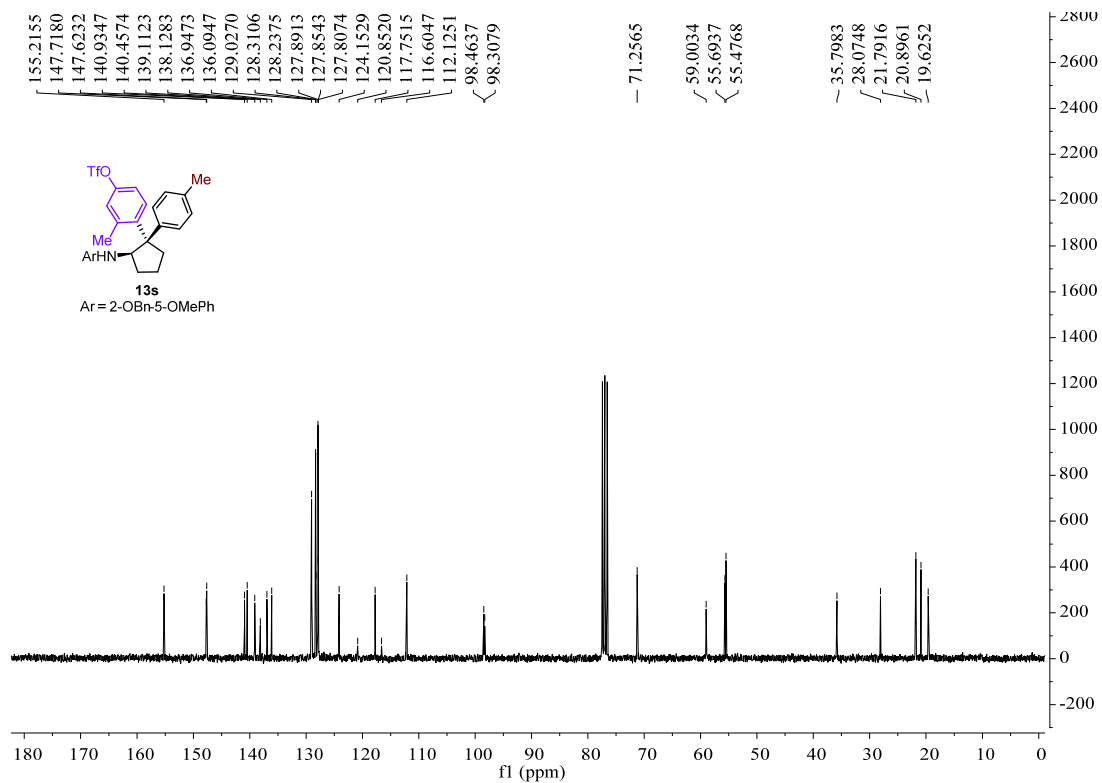

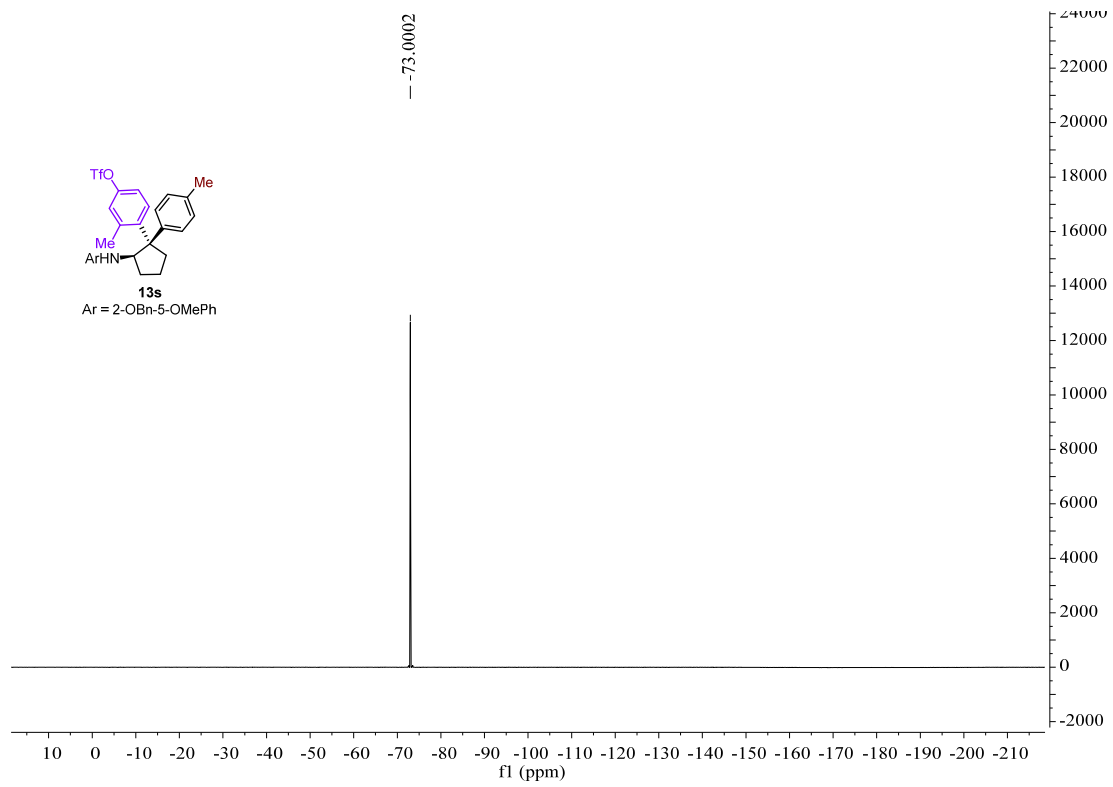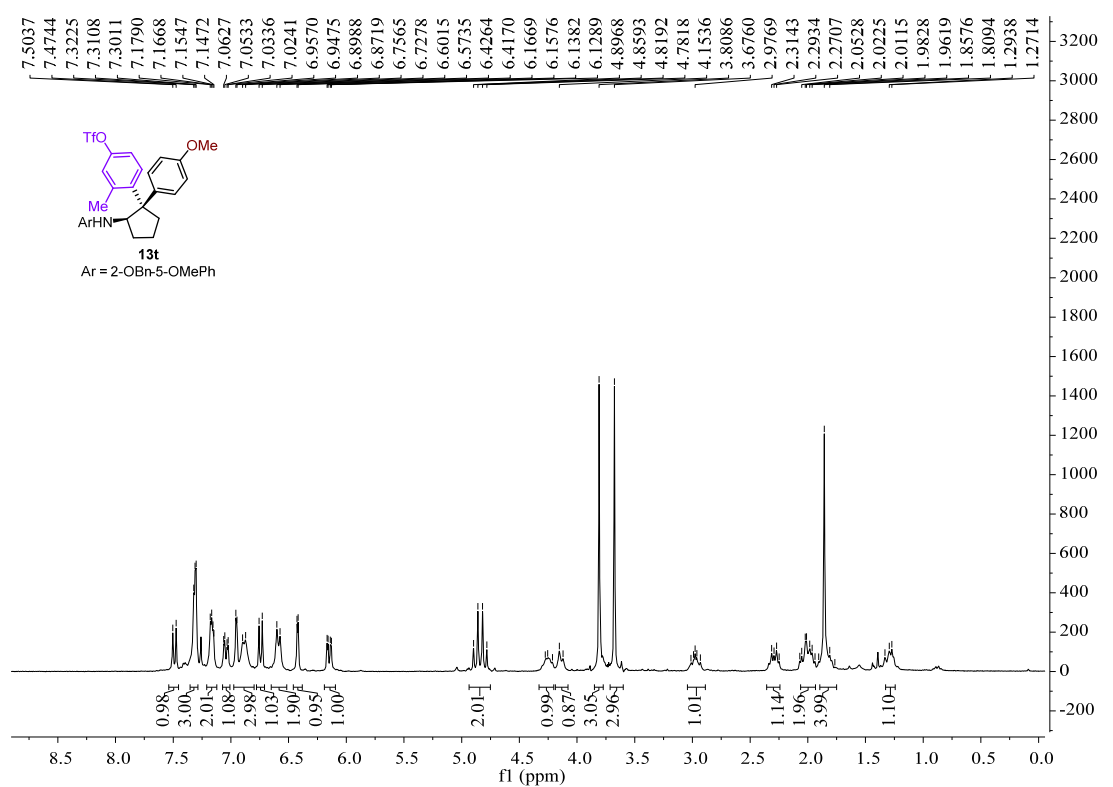

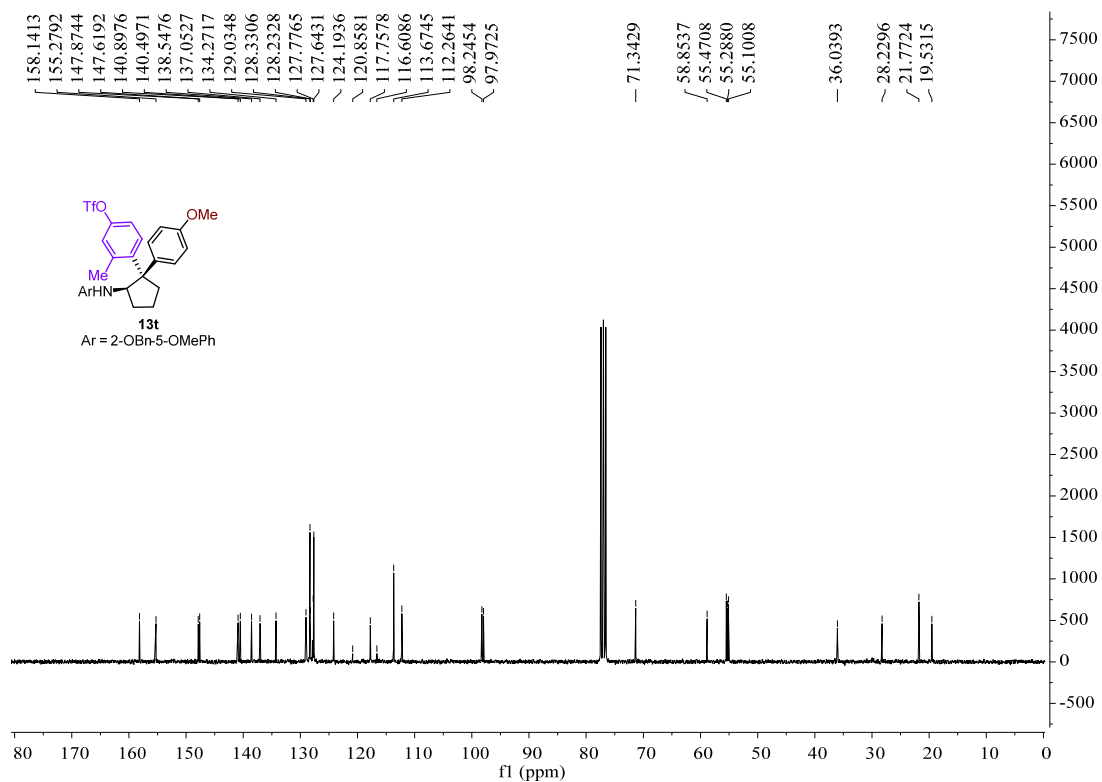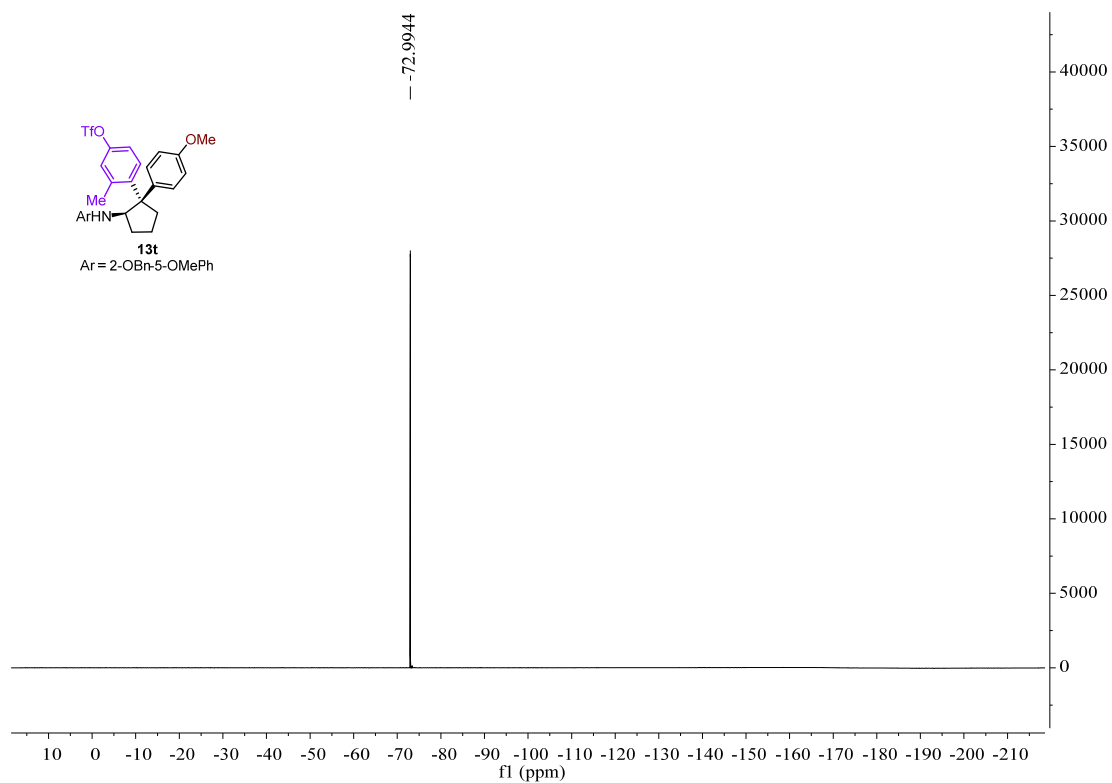

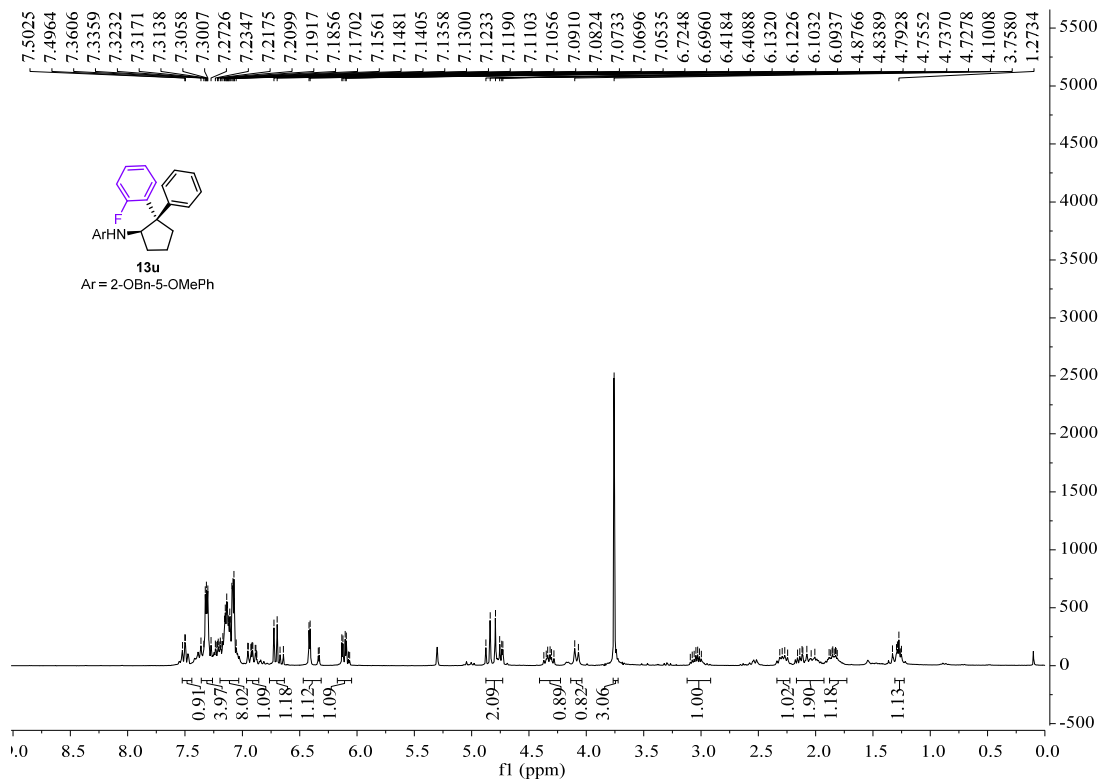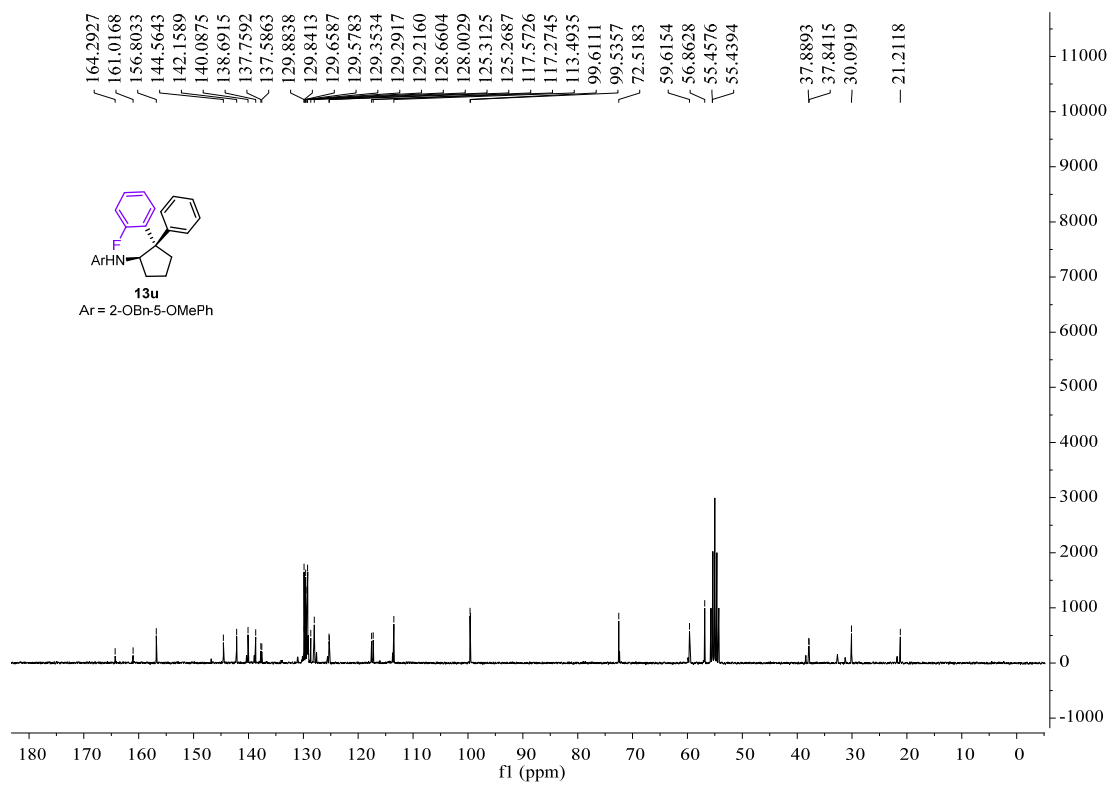



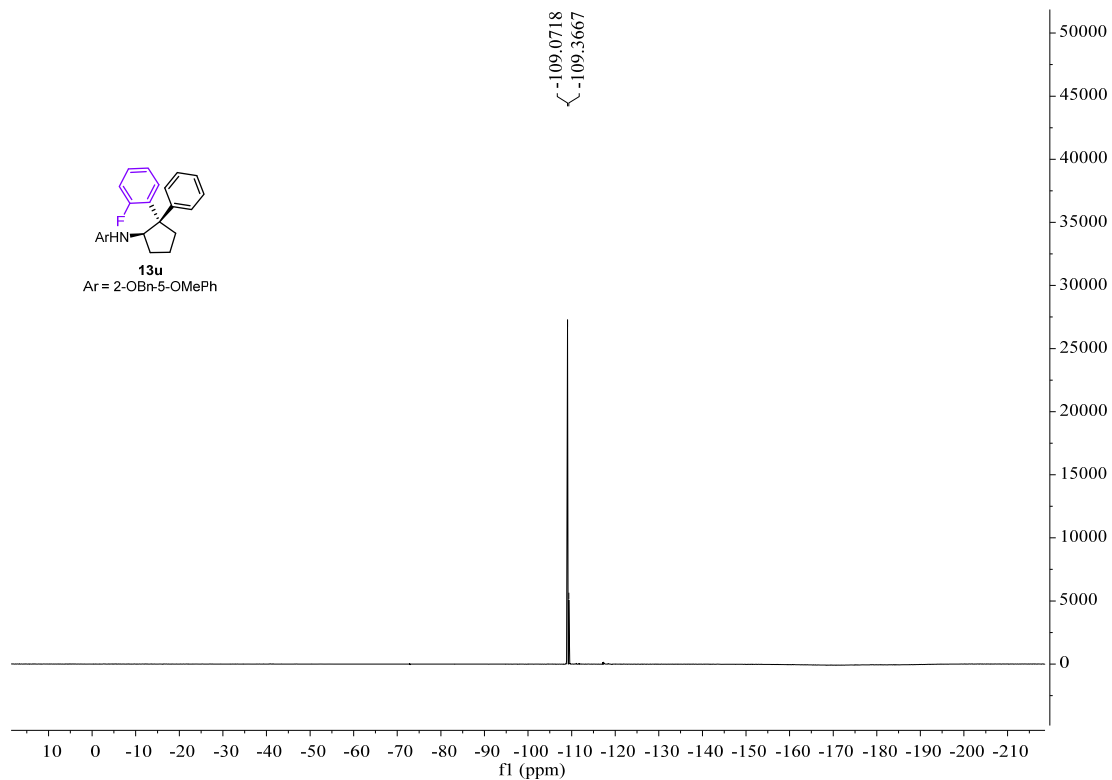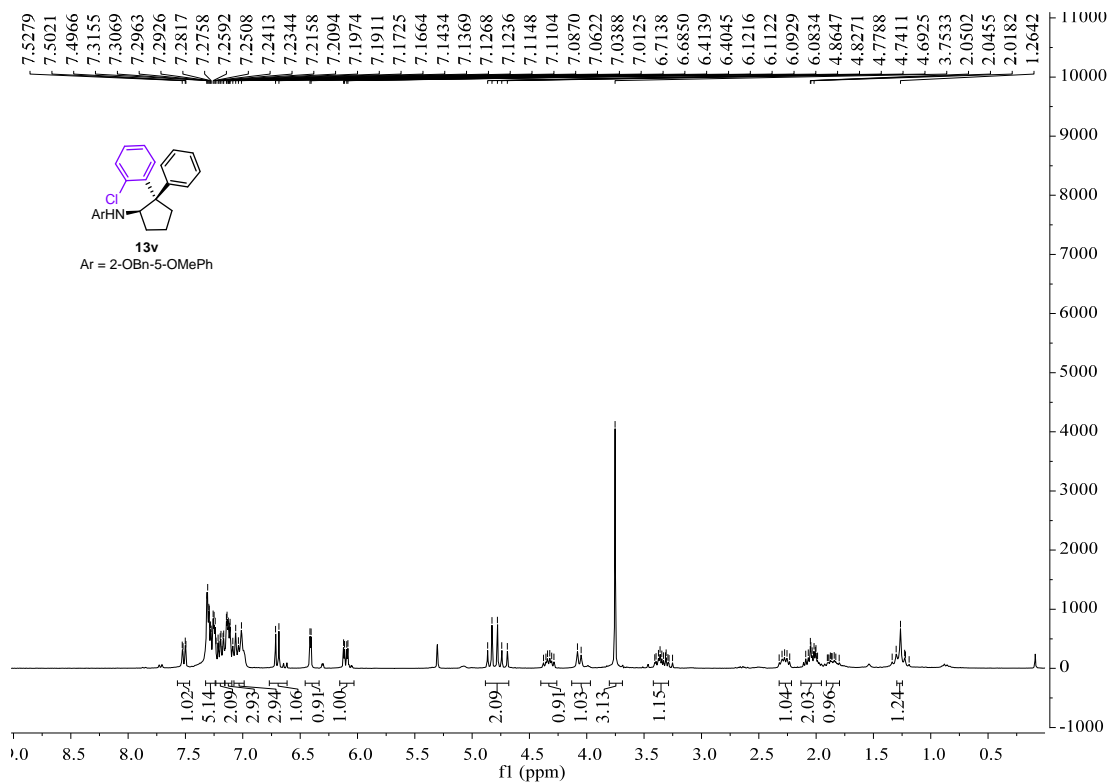

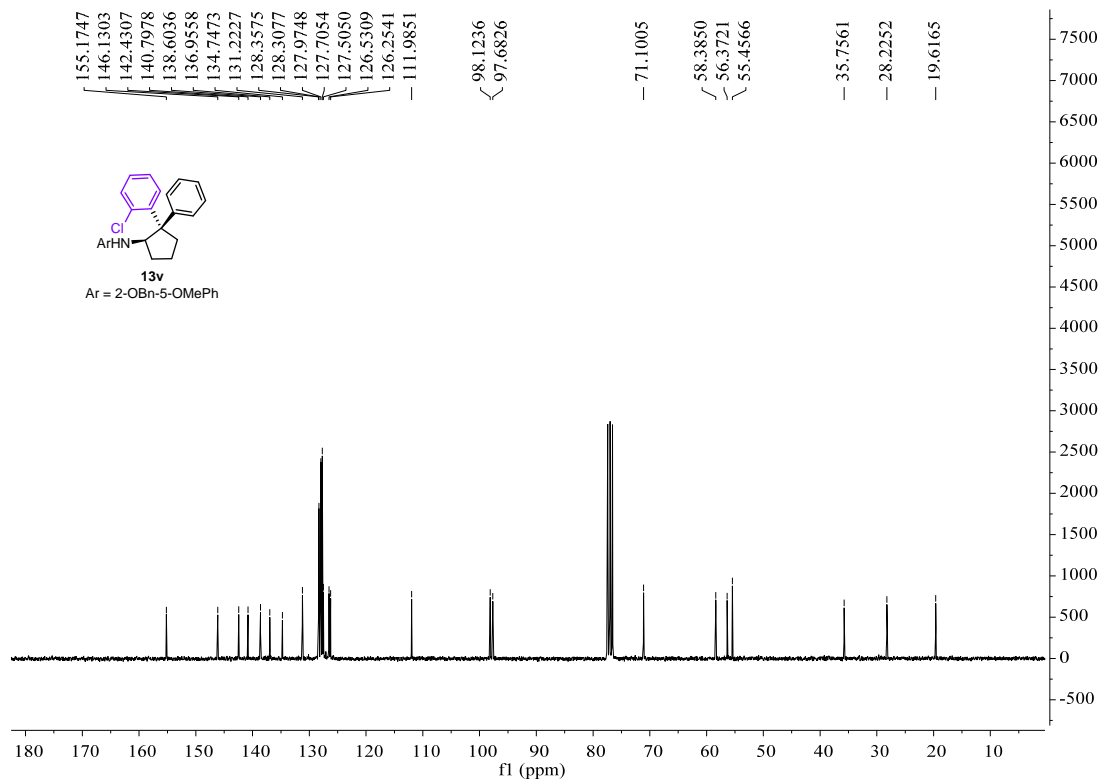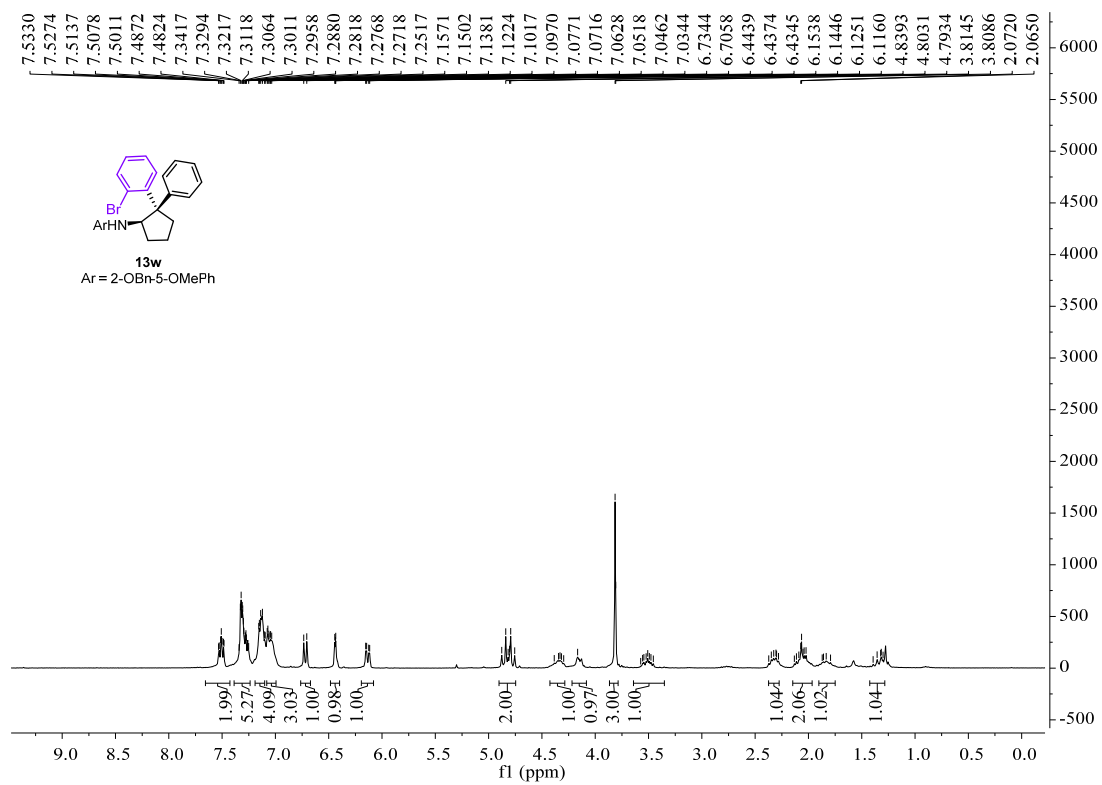

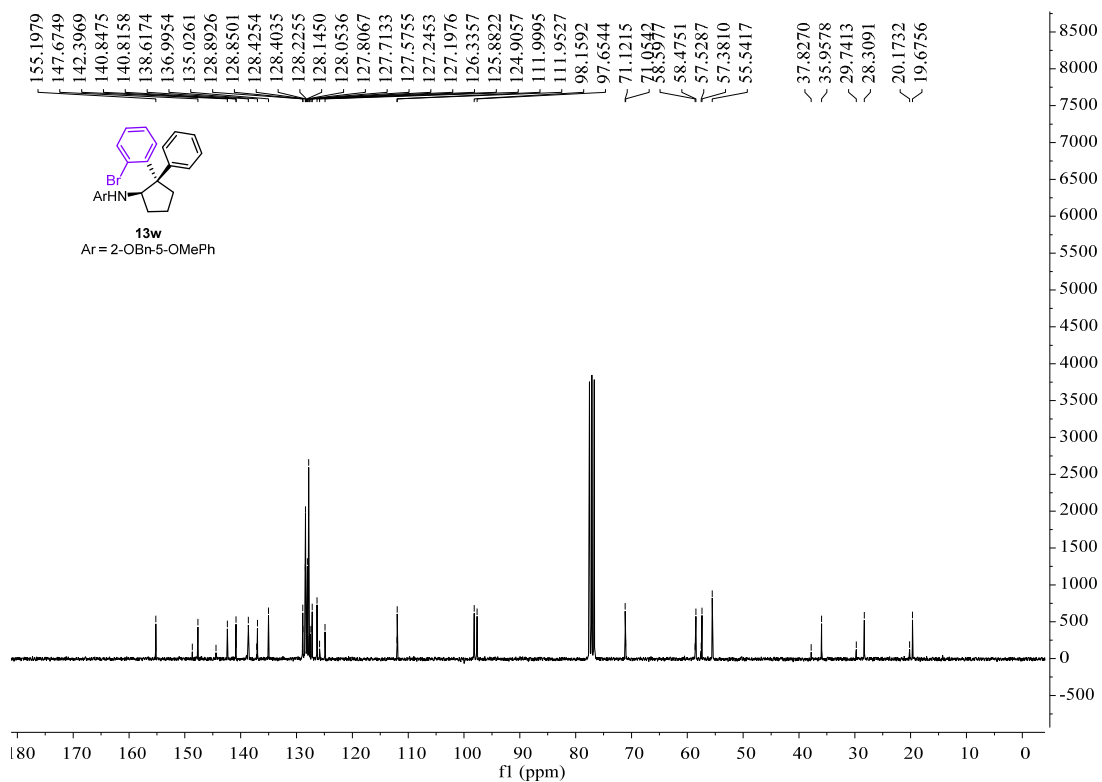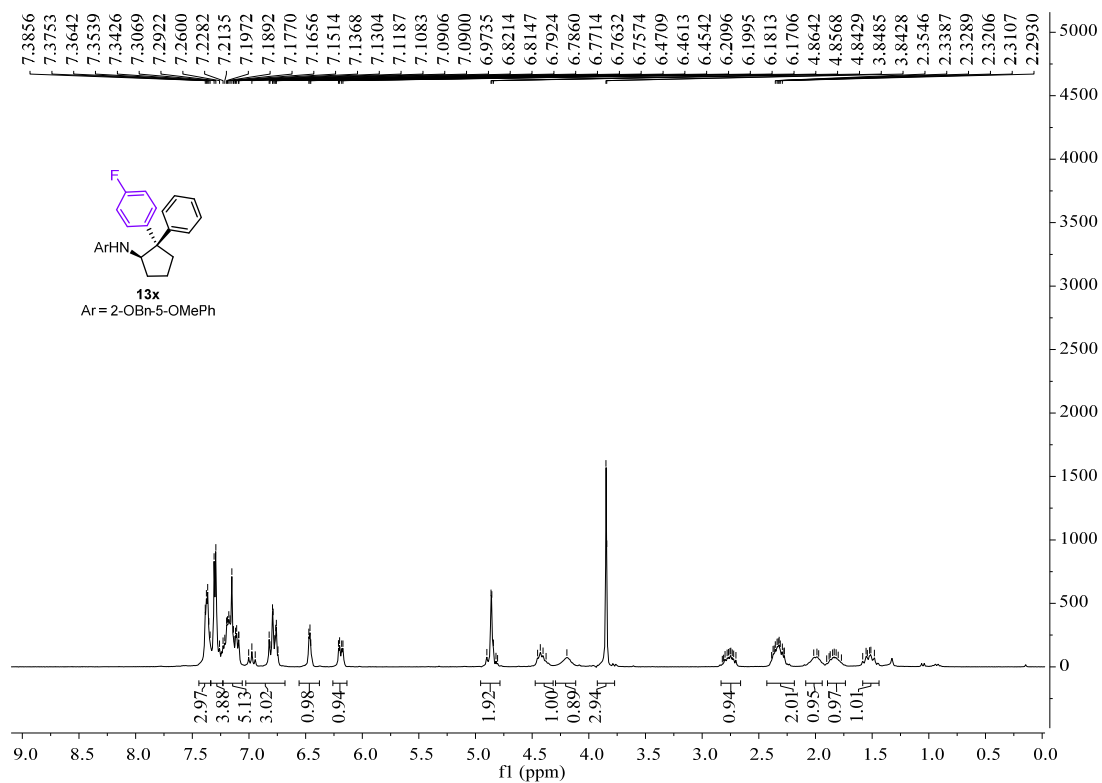

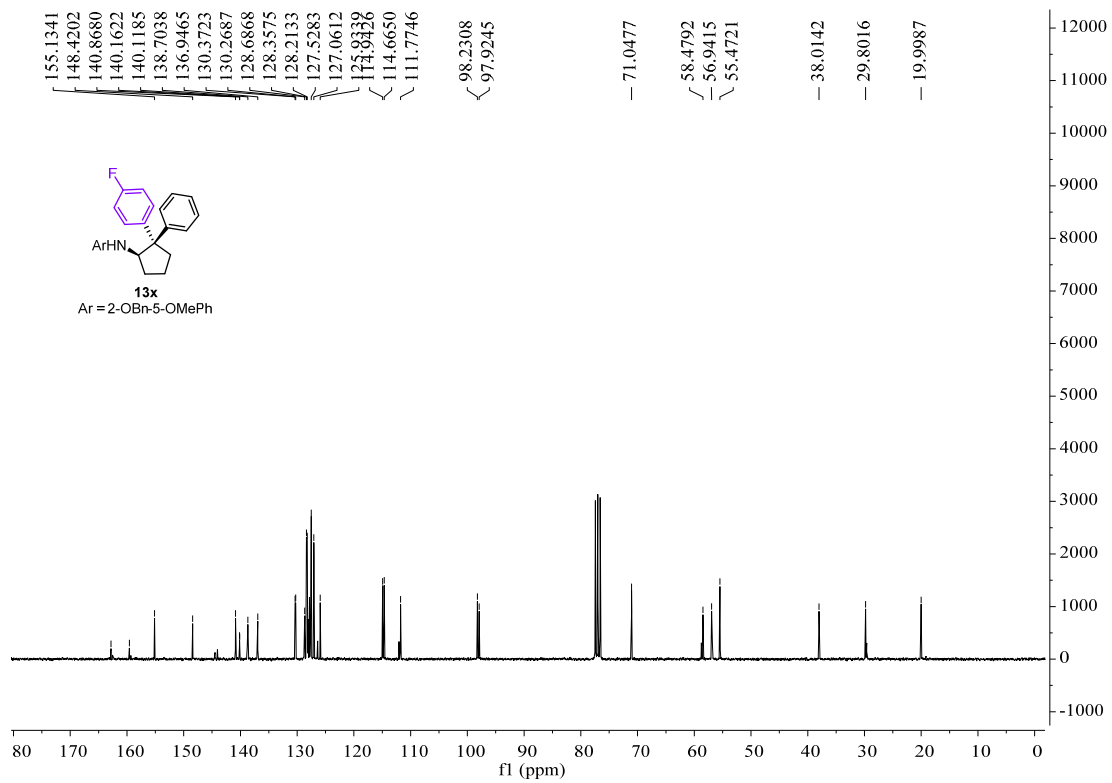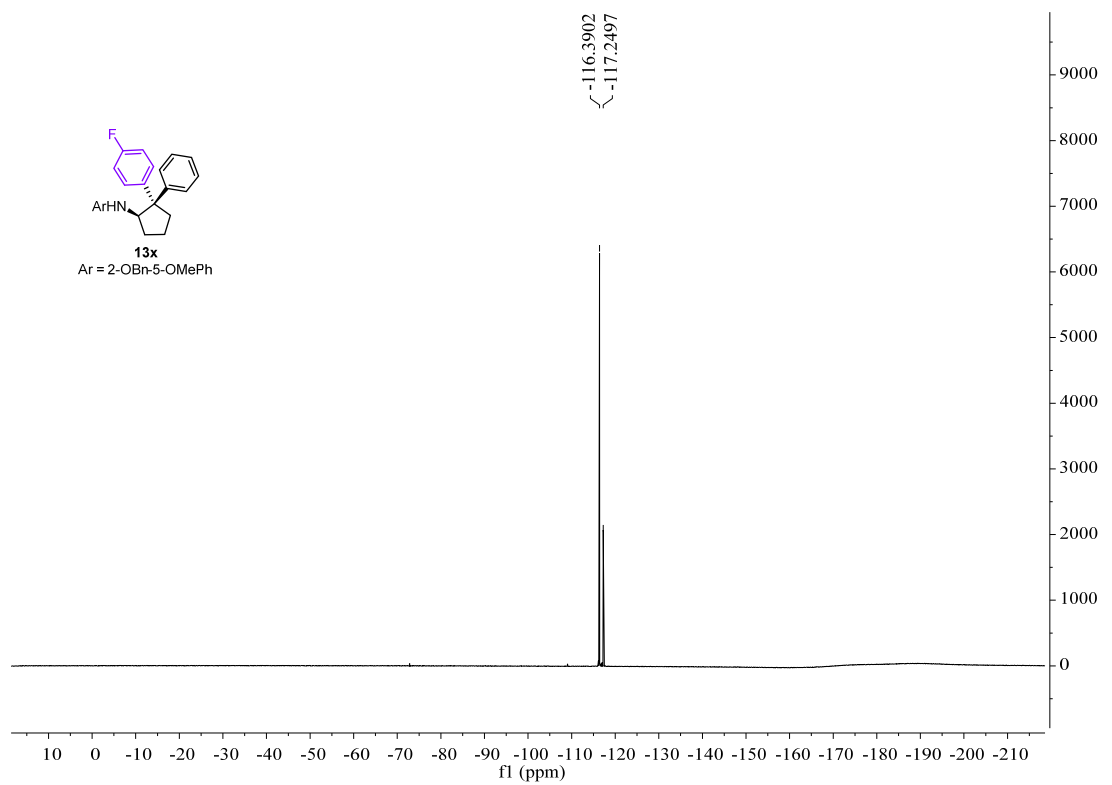

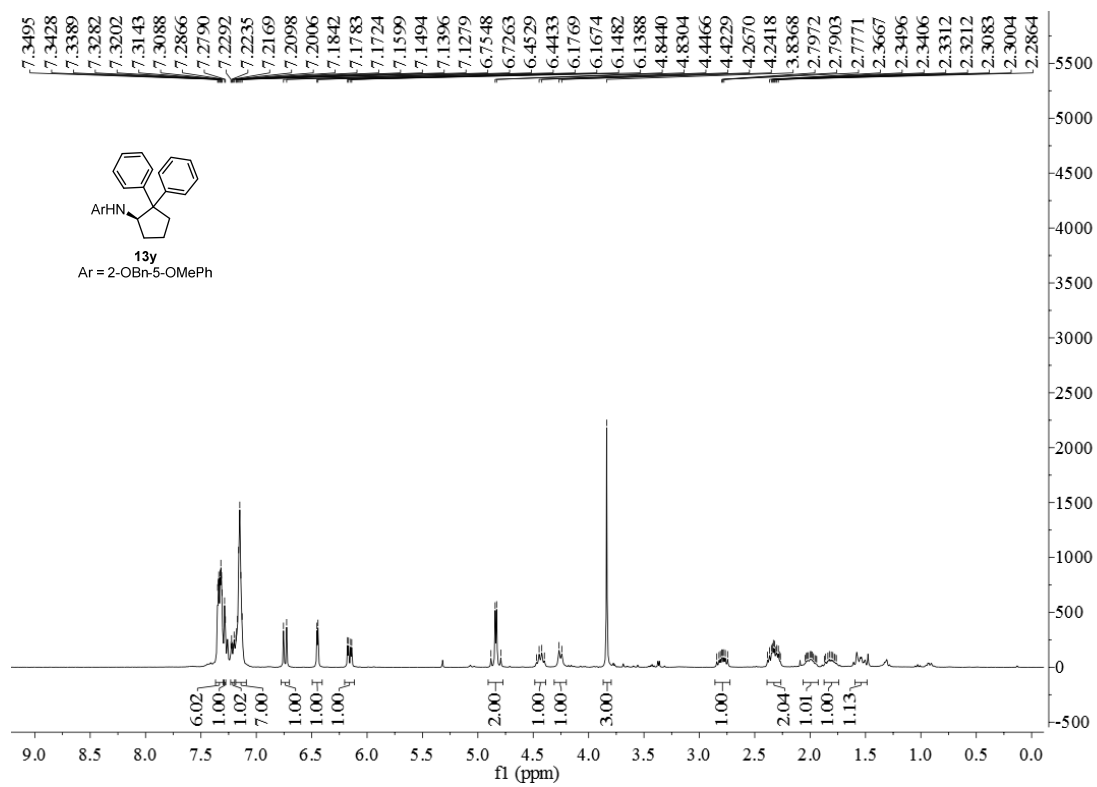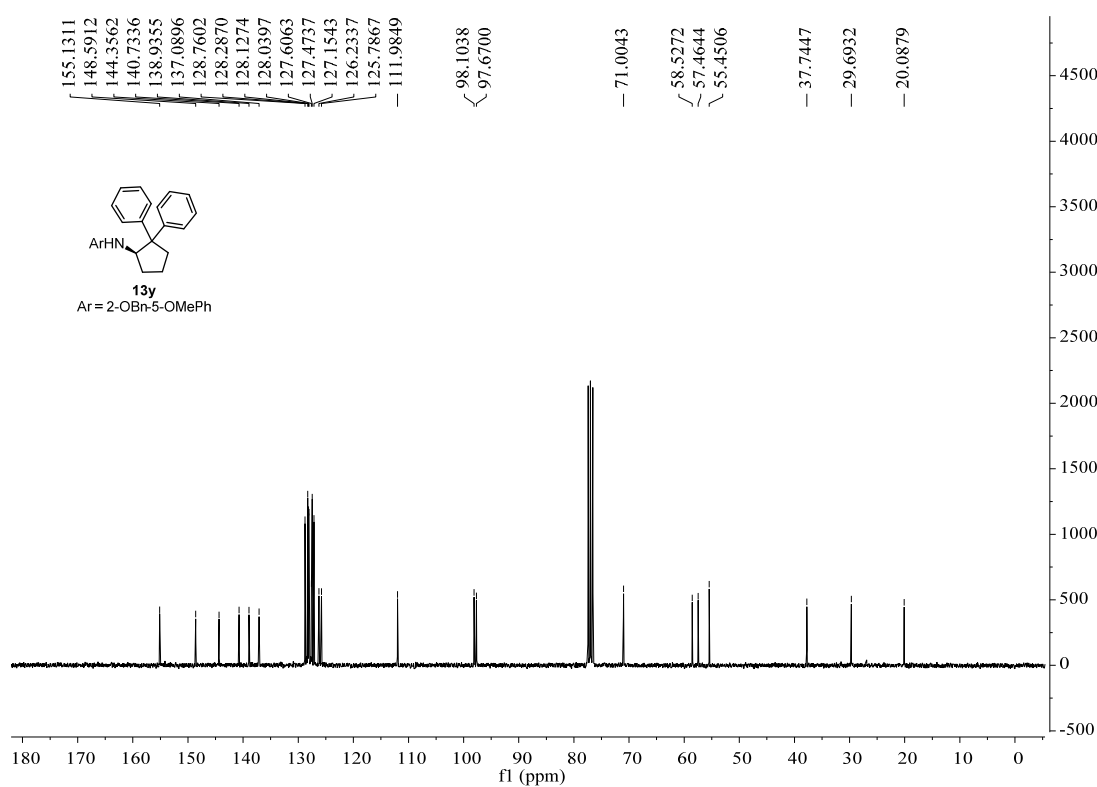

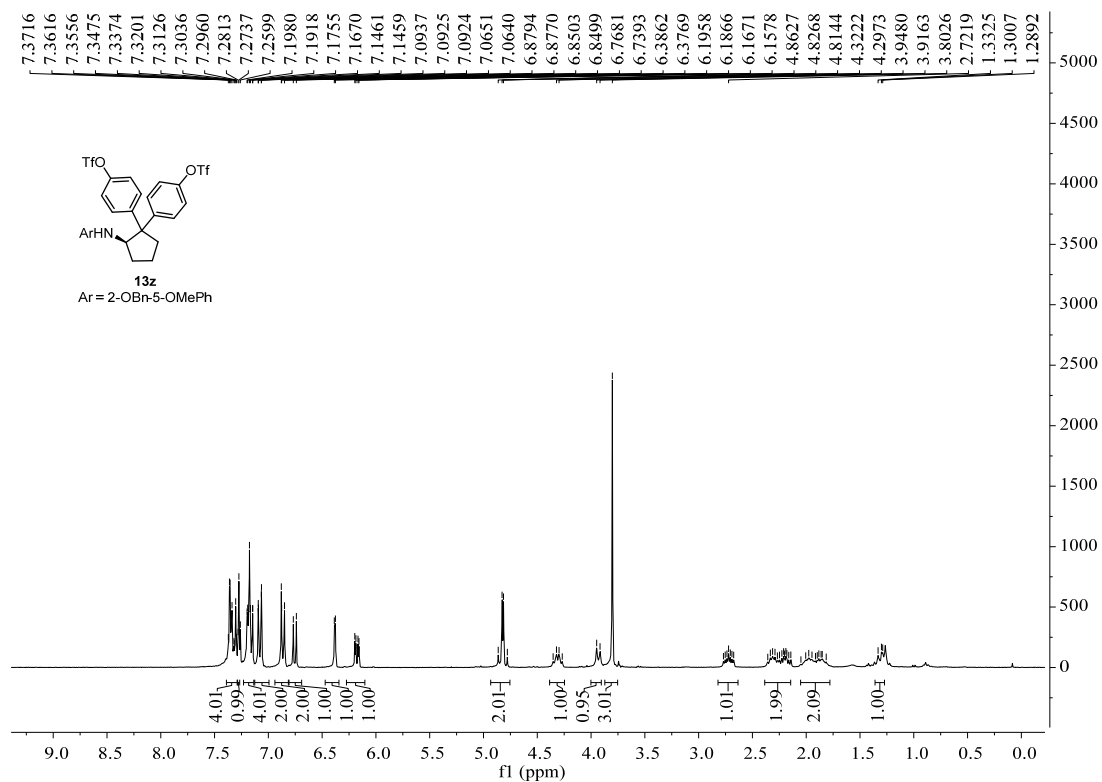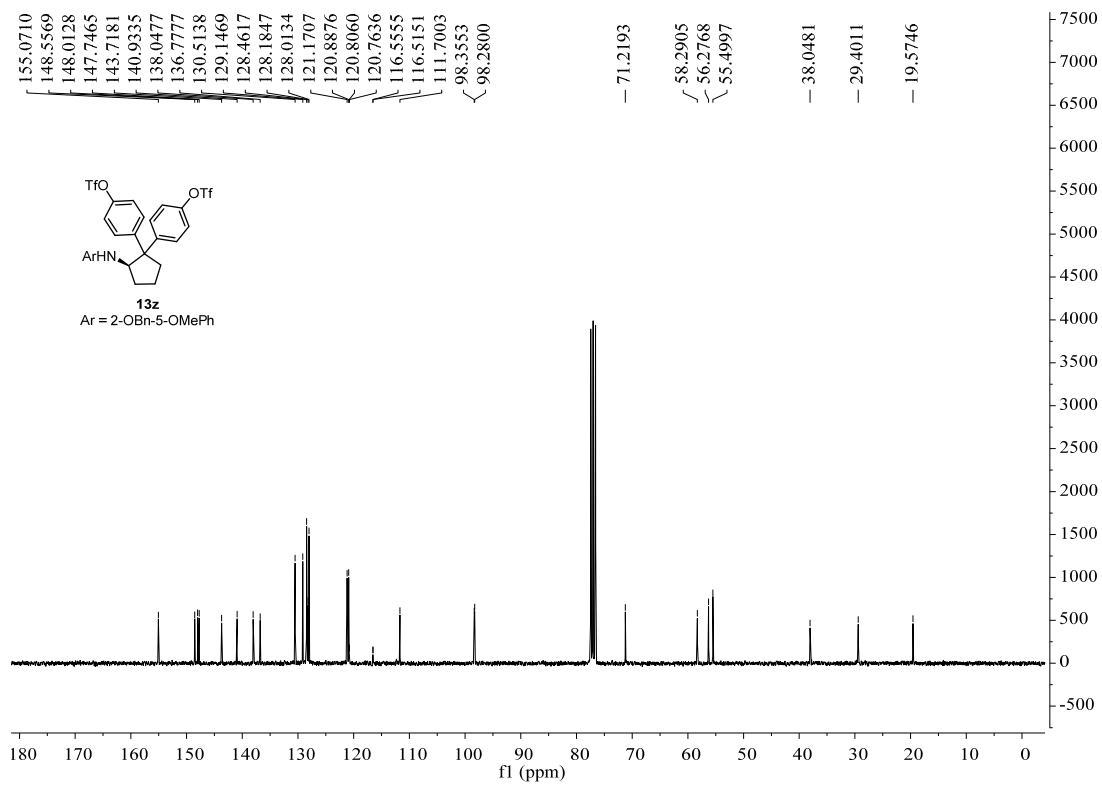

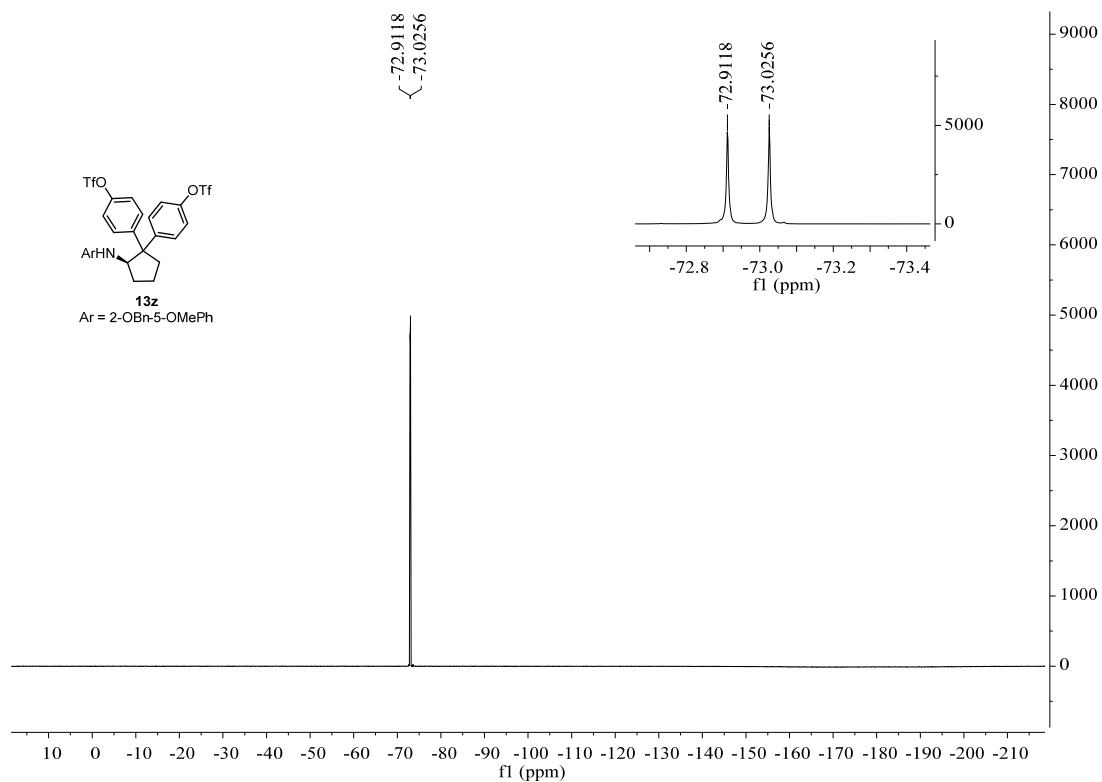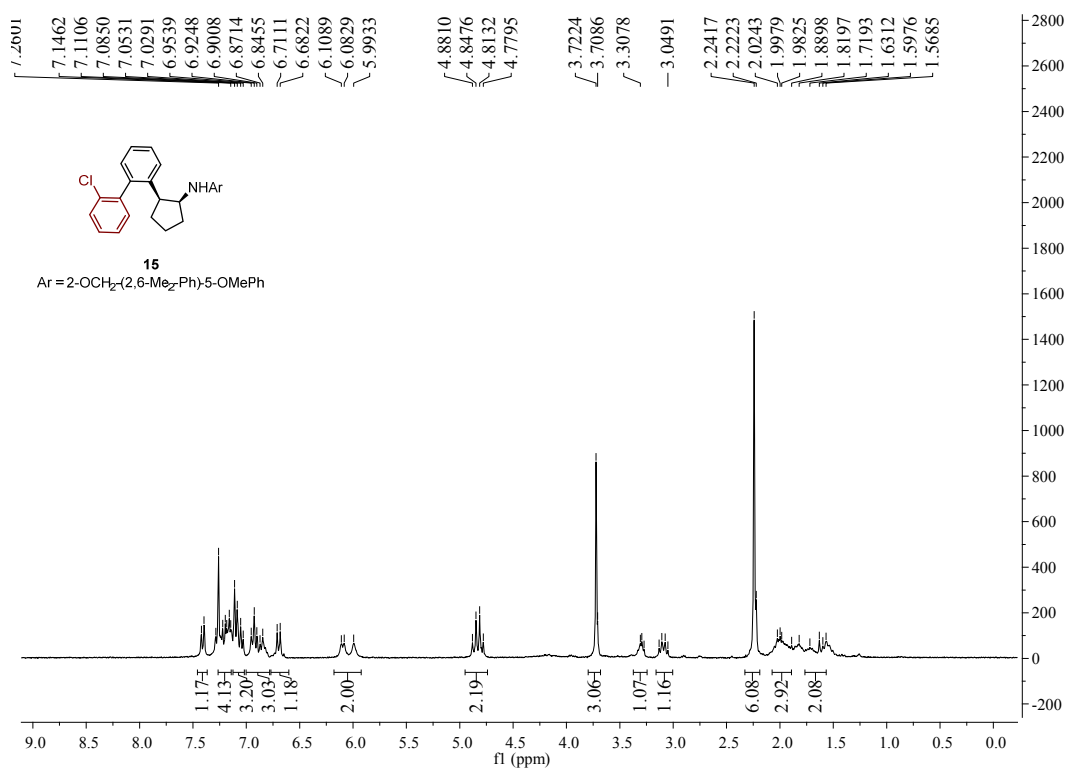

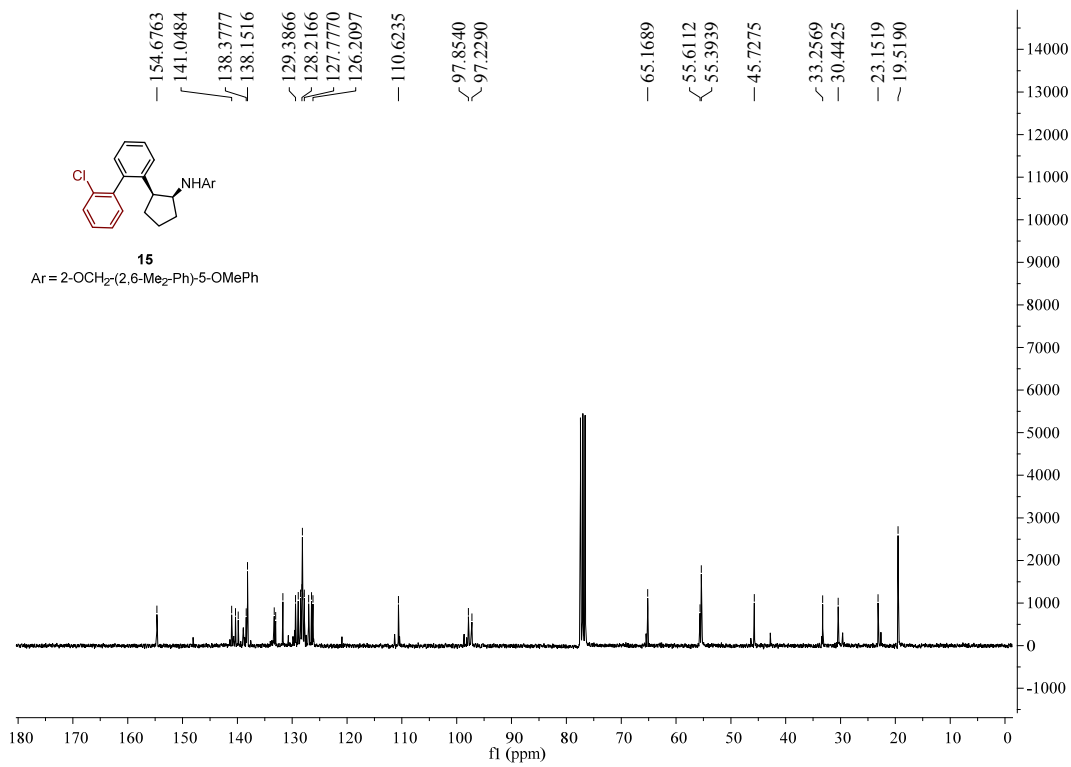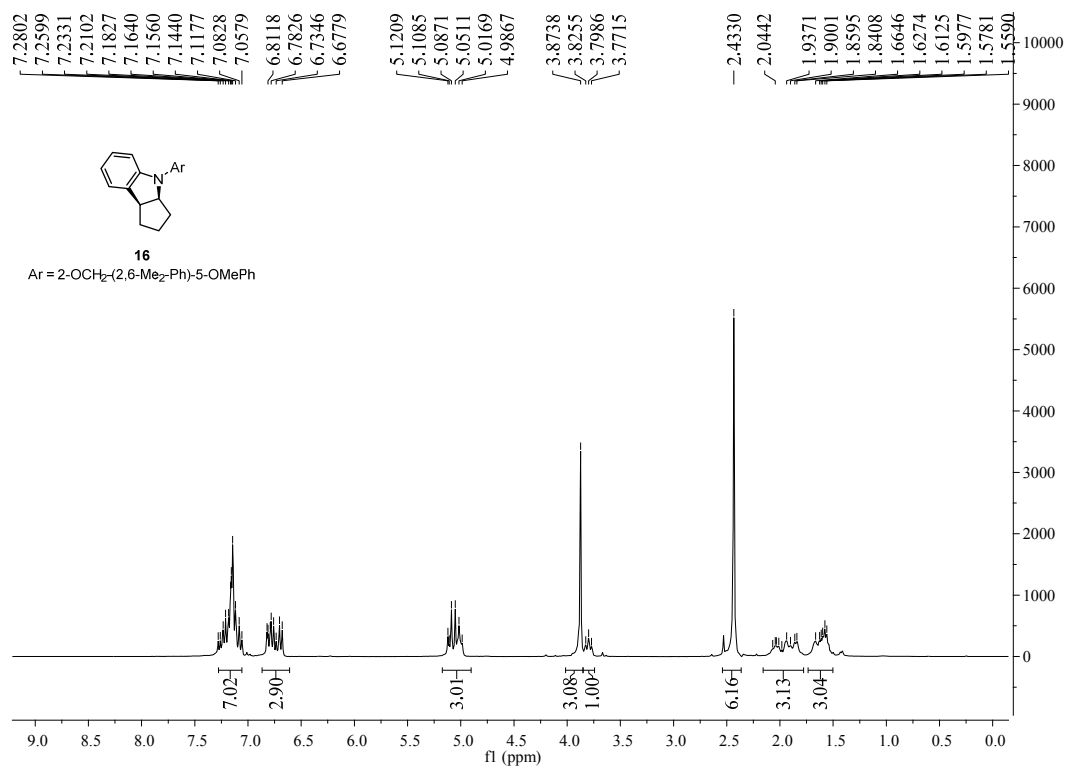



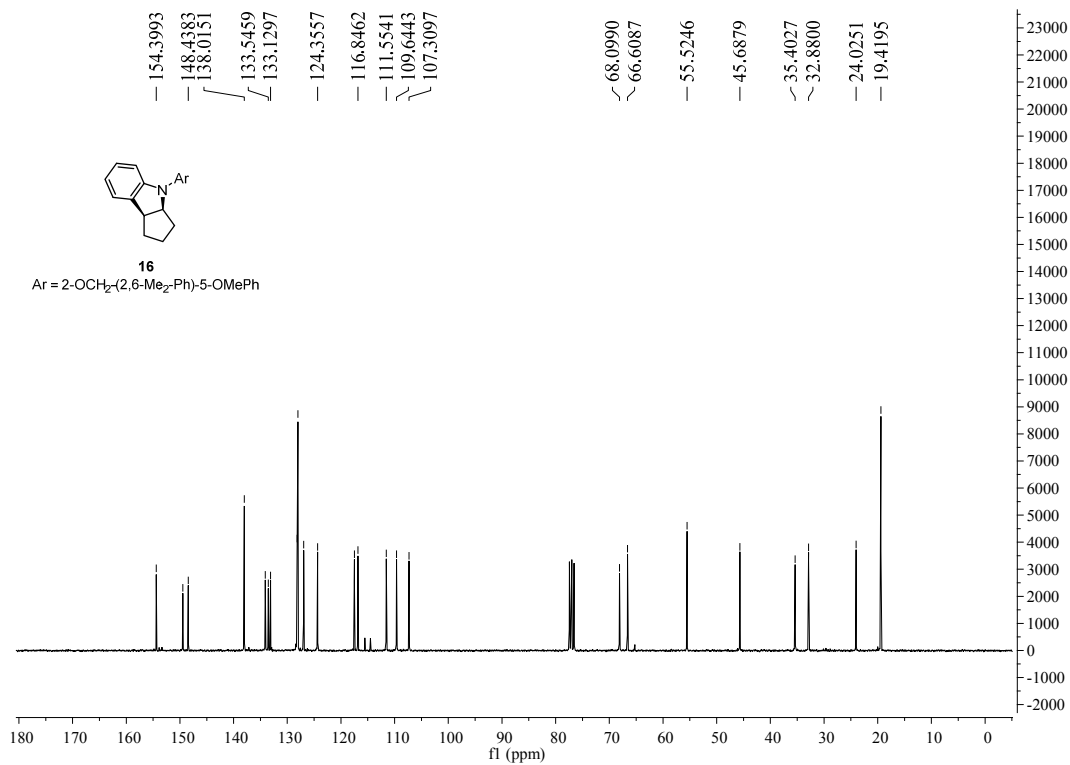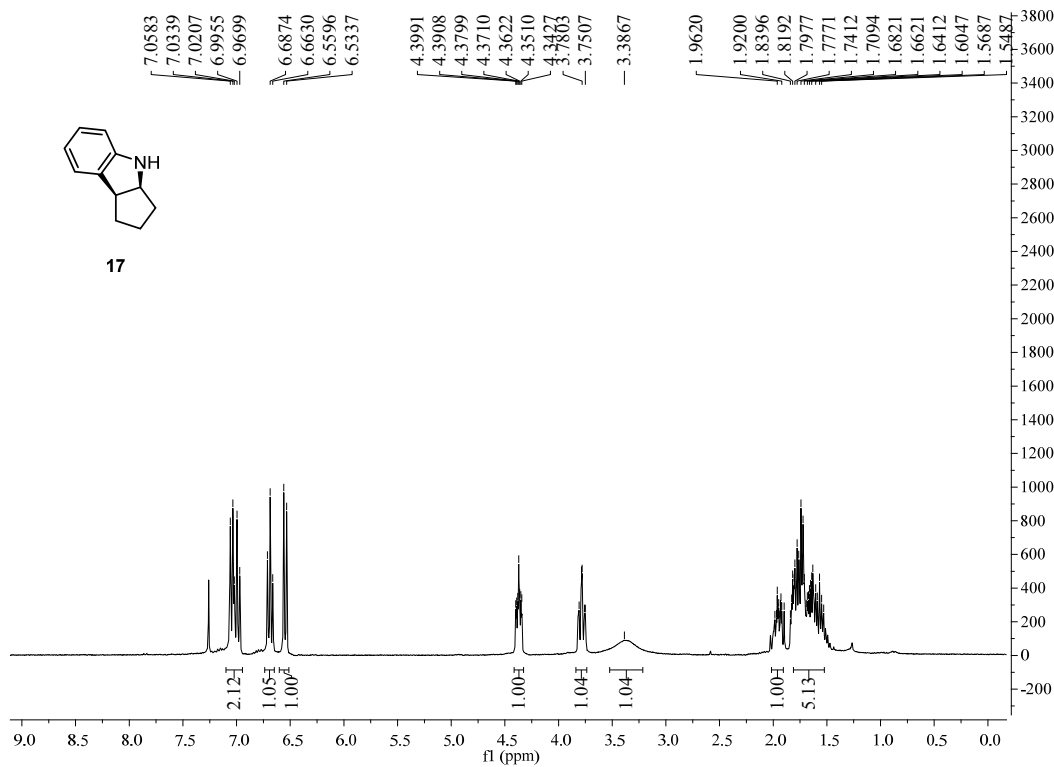

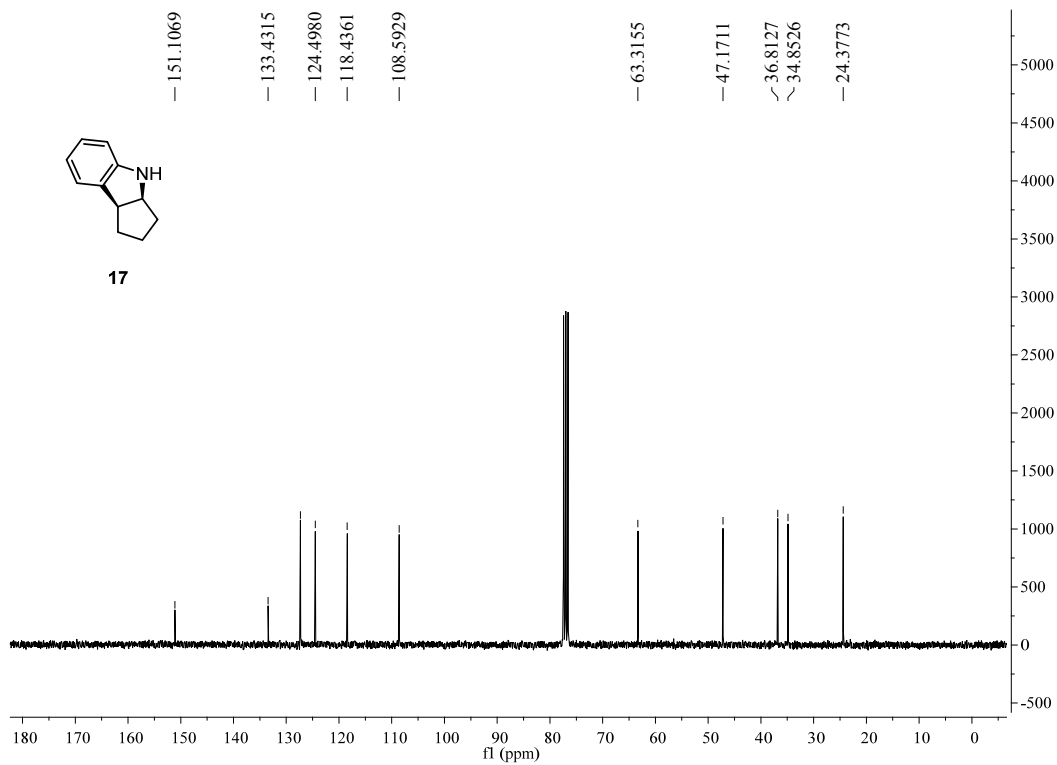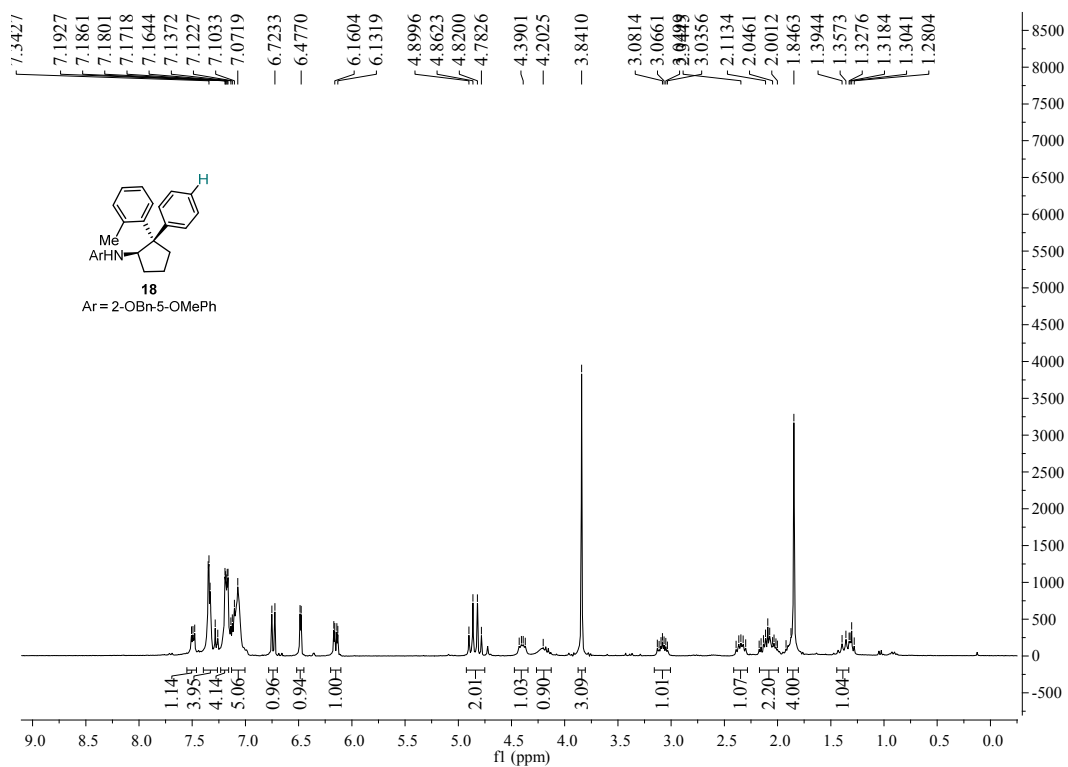

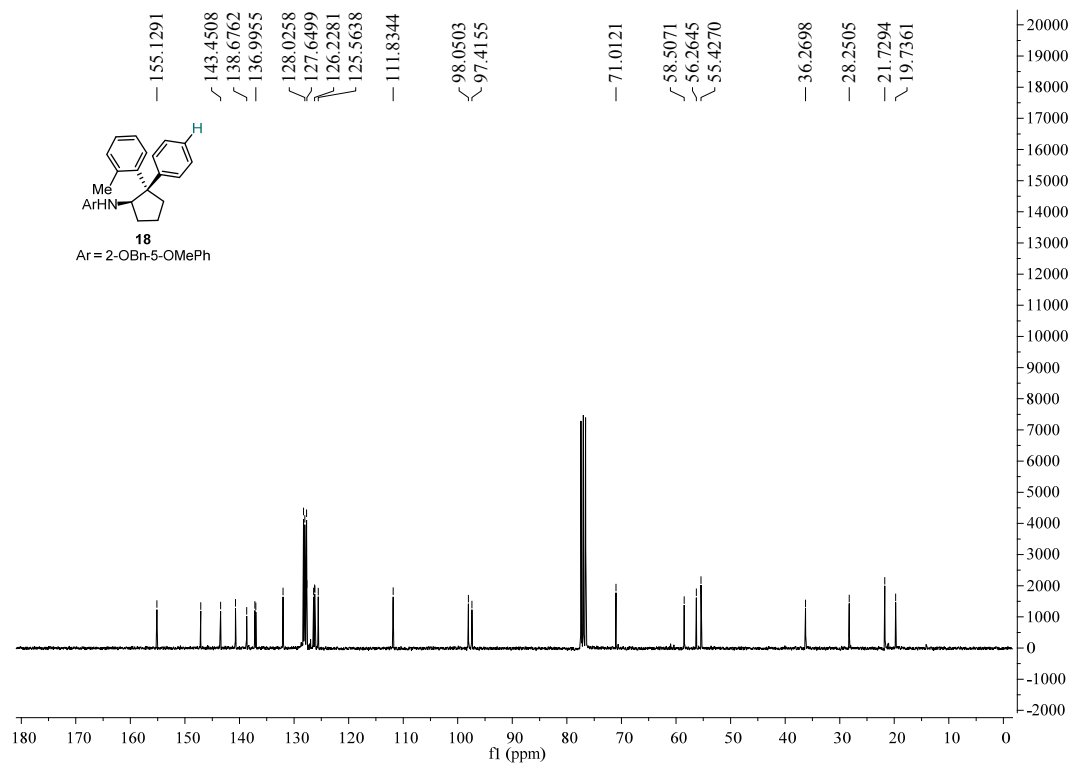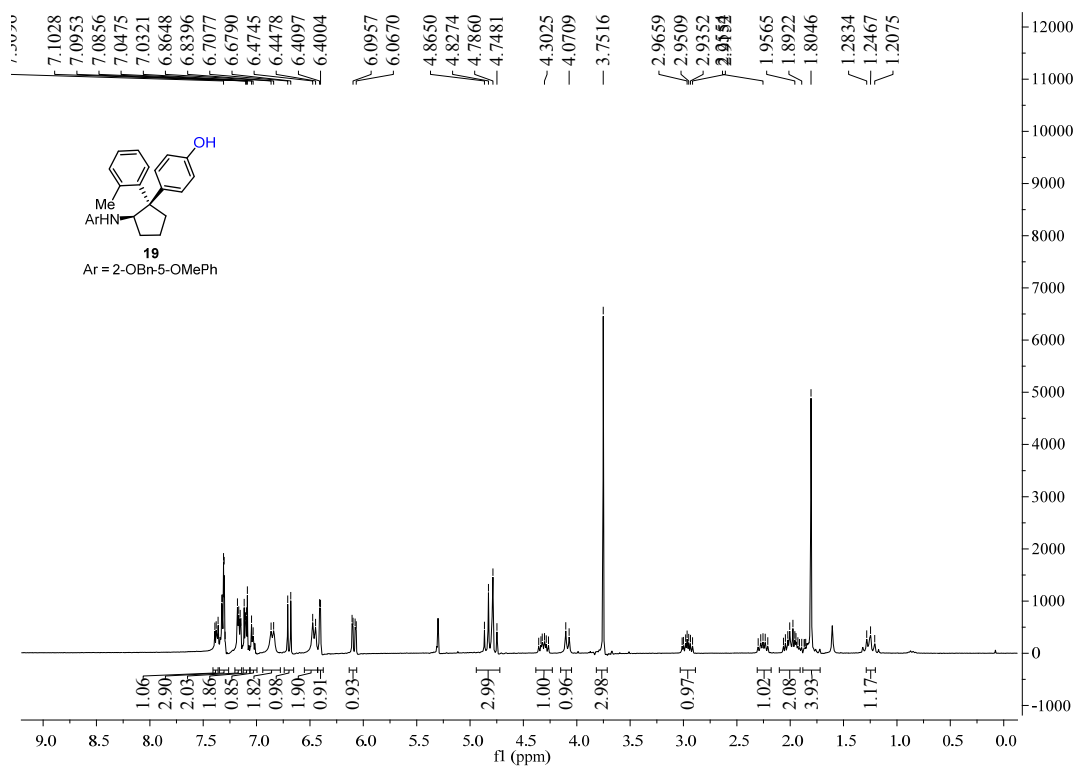

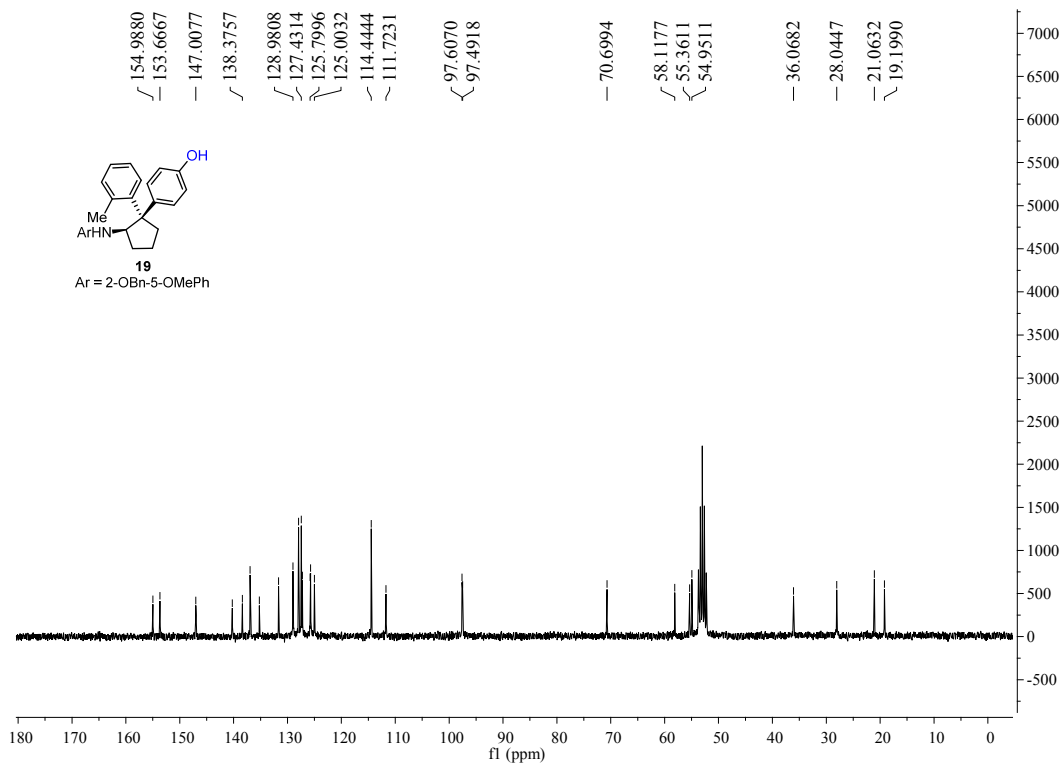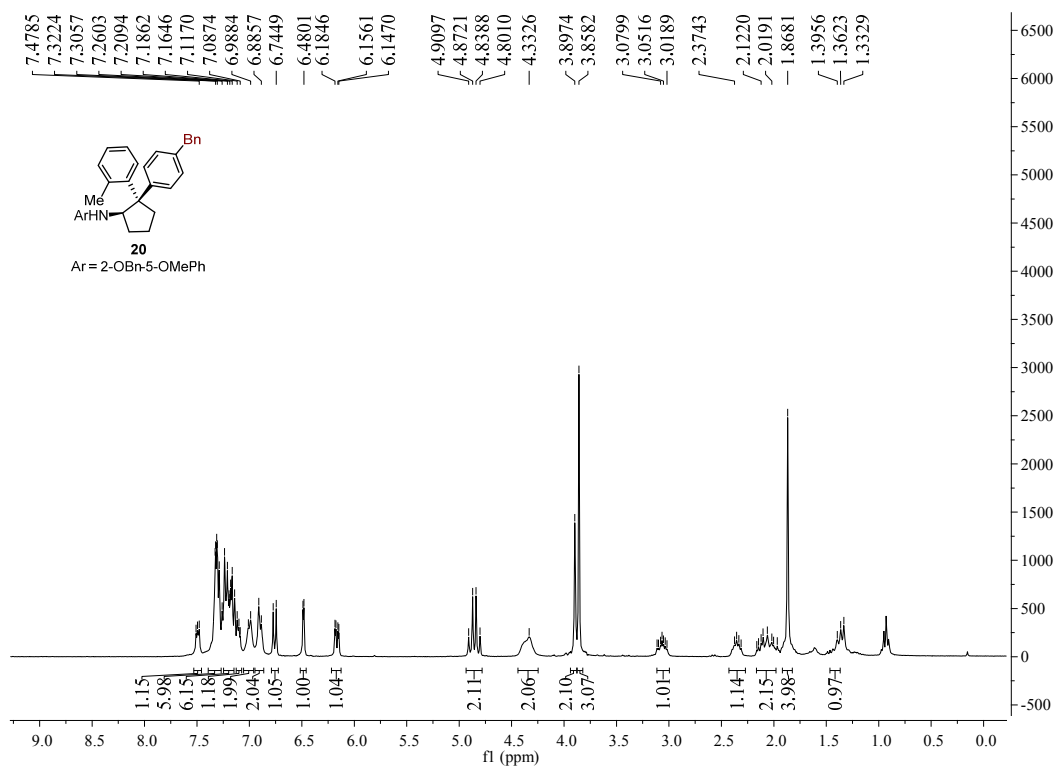

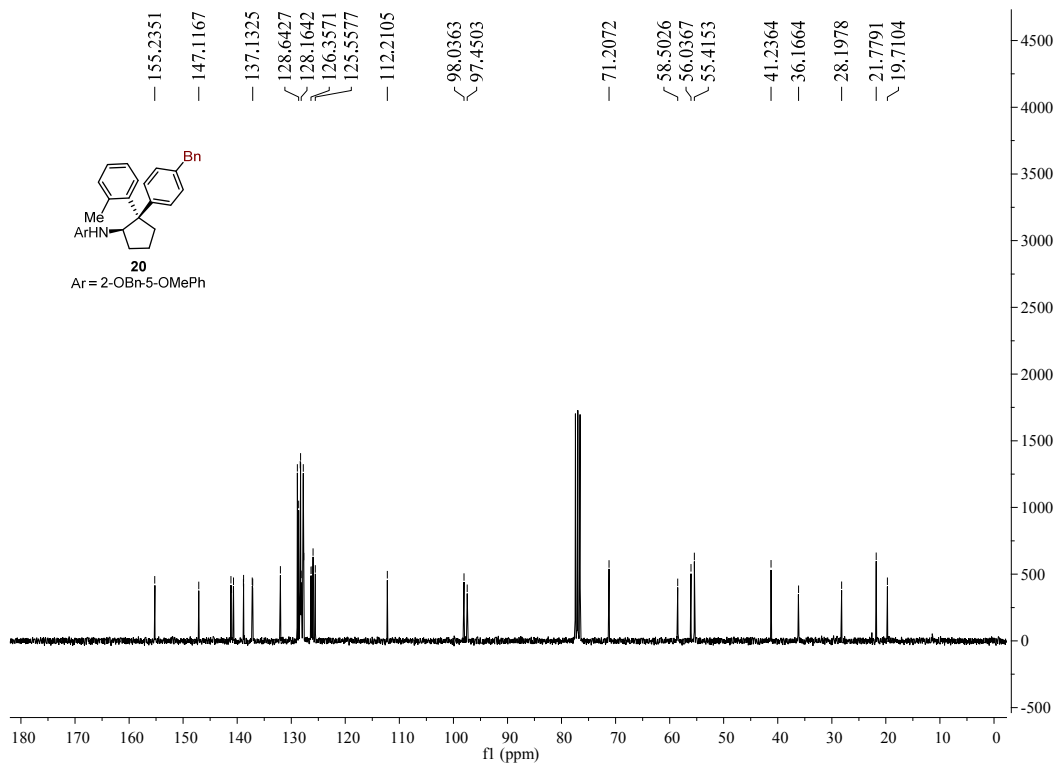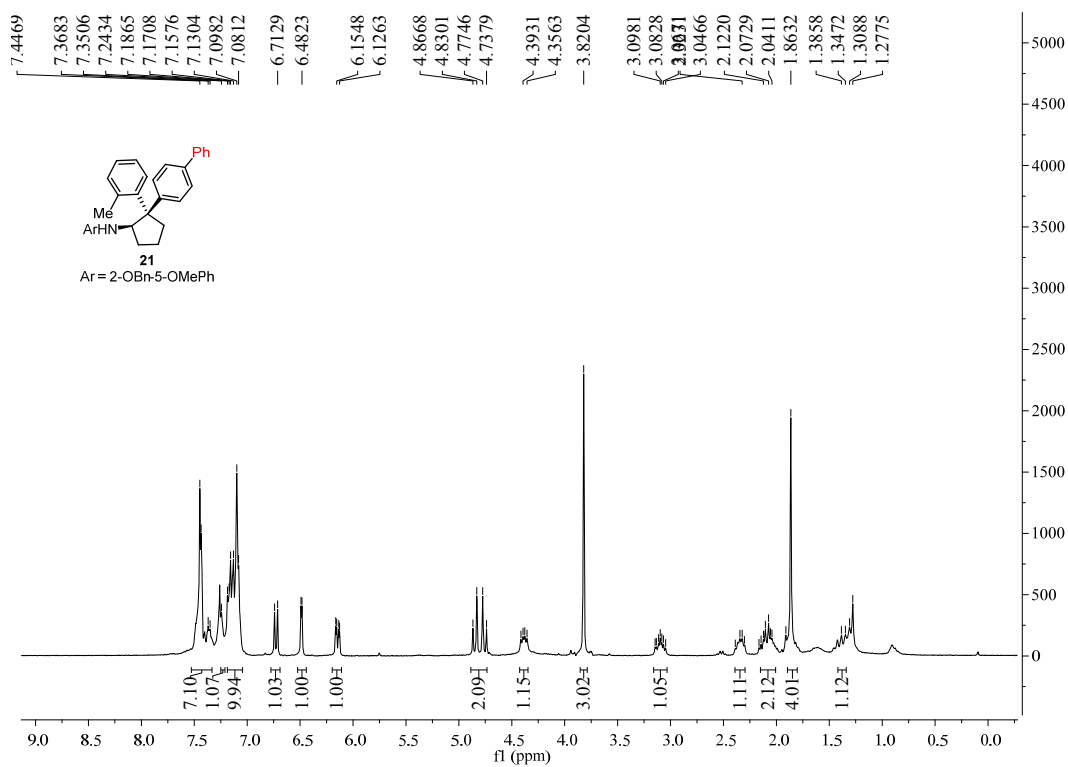

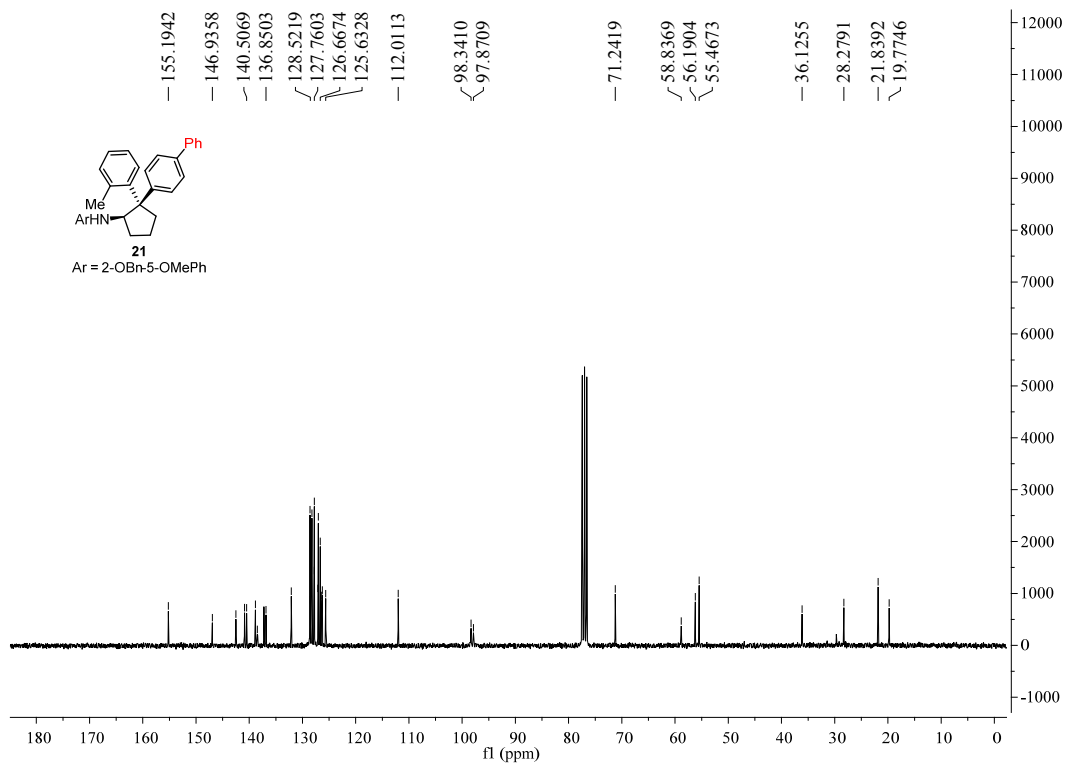

## 9. Other attempted substrates

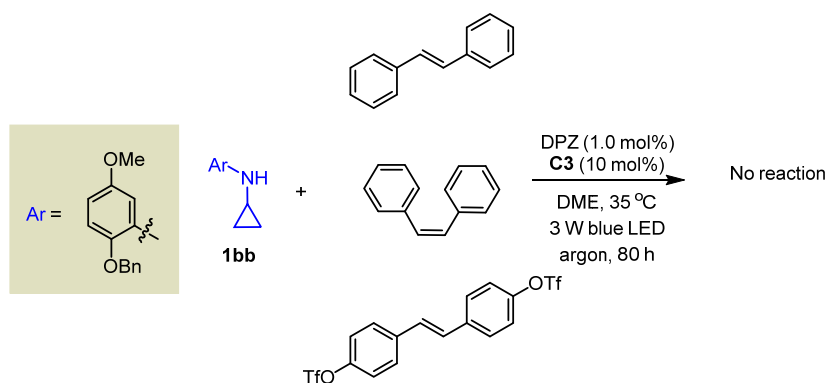

Comments: We carried out a series of transformations between **1bb** with *trans*-stilbene, *cis*-stilbene, and *trans*-stilbene that features OTf group on the aromatic rings under the established reaction conditions. However, no reaction was observed (please read the below figure). We suggest that the higher steric hindrance of such nonterminal olefins leads to the failure of the transformations.
